# Supplementary material for: Sulforaphane suppresses metastasis of triple-negative breast cancer cells by targeting the RAF/MEK/ERK pathway
Source: PubMed Central journal article supplement (PMC8948359; doi:10.1038/s41523-022-00402-4), 2022-03-24

Supplementary Table S1 The results of proteomic analysis

| Protein ID | Protein names                                                    | Gene names | Unique peptides | Sequence coverage [%] | Q-value | Score | Ratio of TGF- $\beta$ 1+SFN | Ratio of TGF- $\beta$ 1+SFN | Ratio of TGF- $\beta$ 1+SFN | Ratio of SFN / Con_1 | Ratio of SFN / Con_2 | Ratio of SFN / Con_3 | Ratio of TGF- $\beta$ 1/ Con 1 | Ratio of TGF- $\beta$ 1/ Con 2 | Ratio of TGF- $\beta$ 1/ Con 3 |
|------------|------------------------------------------------------------------|------------|-----------------|-----------------------|---------|-------|-----------------------------|-----------------------------|-----------------------------|----------------------|----------------------|----------------------|--------------------------------|--------------------------------|--------------------------------|
| A0A2R8YD12 | Serpin B6                                                        | SERPINB6   | 9               | 38.6                  | 0       | 77.31 | 1.23                        | 1.36                        | 1.18                        | 1.15                 | 0.92                 | 1.19                 | 1.11                           | 1.24                           | 1.13                           |
| A0A024R4E5 | Vigilin                                                          | HDLBP      | 15              | 16.7                  | 0       | 33.19 | 1.00                        | 1.25                        | NaN                         | NaN                  | 0.85                 | 0.93                 | NaN                            | 0.97                           | 0.79                           |
| A0A024R4M0 | 40S ribosomal protein S9<br>Proteasome subunit alpha             | RPS9       | 15              | 57.7                  | 0       | 32.79 | 0.74                        | 0.75                        | 0.73                        | 0.77                 | 0.95                 | 0.80                 | 0.85                           | 0.68                           | 0.75                           |
| A0A024RA52 | type;Proteasome subunit alpha<br>type-2                          | PSMA2      | 10              | 53.4                  | 0       | 39.83 | 0.95                        | 1.12                        | 1.03                        | 1.06                 | 0.88                 | 1.04                 | 1.05                           | 0.93                           | 0.89                           |
| E9PKG6     | Nucleobindin-2;Nesfatin-1                                        | NUCB2      | 4               | 15.1                  | 0       | 3.55  | 0.92                        | 0.85                        | 0.93                        | 0.77                 | 0.77                 | 0.91                 | 0.79                           | 0.89                           | NaN                            |
| A0A087WSW9 | Thioredoxin reductase 1,<br>cytoplasmic                          | TXNRD1     | 15              | 51.1                  | 0       | 322.7 | 1.42                        | 1.38                        | 1.38                        | 1.24                 | 1.65                 | 1.45                 | 1.02                           | 1.01                           | 0.88                           |
| A0A087WT44 | Heme oxygenase 2                                                 | HMOX2      | 3               | 11.6                  | 0       | 6.981 | NaN                         | NaN                         | NaN                         | 0.80                 | NaN                  | 0.61                 | NaN                            | 0.51                           | 0.63                           |
| A0A087WTP3 | Far upstream element-binding<br>protein 2                        | KHSRP      | 22              | 40.2                  | 0       | 323.3 | 1.16                        | 1.19                        | 1.11                        | 1.00                 | 1.17                 | 1.27                 | 1.14                           | 0.84                           | 1.07                           |
| A0A087WU07 | MICOS complex subunit MIC10                                      | MINOS1     | 2               | 24.2                  | 0.009   | 1.412 | 1.33                        | 1.33                        | 1.09                        | NaN                  | NaN                  | 1.12                 | NaN                            | NaN                            | 0.91                           |
| A0A087WUB9 | Beta-catenin-like protein 1                                      | CTNNBL1    | 4               | 6.5                   | 0       | 3.143 | 0.91                        | 1.10                        | 1.04                        | NaN                  | 1.13                 | 0.96                 | 1.14                           | 1.25                           | 0.54                           |
| E9PL01     | Signal peptidase complex subunit<br>2                            | SPCS2      | 3               | 26.1                  | 0       | 112.1 | 1.13                        | 1.27                        | 1.23                        | 1.14                 | 1.12                 | NaN                  | NaN                            | 1.35                           | 1.22                           |
| A0A087WUD3 | Oligosaccharyltransferase<br>complex subunit OSTC                | OSTC       | 1               | 14.5                  | 0.002   | 1.956 | 1.05                        | 1.06                        | 0.94                        | 0.91                 | NaN                  | 0.93                 | 0.98                           | NaN                            | 0.99                           |
| A0A087WUK2 | Heterogeneous nuclear<br>ribonucleoprotein D-like                | HNRNPDL    | 7               | 23.7                  | 0       | 185.9 | 0.79                        | 0.83                        | 0.82                        | NaN                  | 0.77                 | 0.81                 | 0.94                           | 0.95                           | 0.78                           |
| A0A087WZG9 | Retrotransposon-derived protein<br>PEG10                         | PEG10      | 2               | 6.7                   | 1E-03   | 2.249 | 1.68                        | 1.72                        | 1.69                        | 1.46                 | 1.53                 | 2.05                 | NaN                            | 1.48                           | 1.38                           |
| A0A087WUN7 | SRA stem-loop-interacting RNA-<br>binding protein, mitochondrial | SLIRP      | 4               | 55.4                  | 0       | 24.8  | 0.90                        | 1.49                        | 0.79                        | 0.64                 | 0.77                 | 0.80                 | 0.69                           | 0.68                           | NaN                            |
| A0A087WUQ6 | Glutathione<br>peroxidase;Glutathione<br>peroxidase 1            | GPX1       | 3               | 22.8                  | 0       | 5.291 | 1.17                        | NaN                         | 0.96                        | NaN                  | NaN                  | NaN                  | NaN                            | NaN                            | NaN                            |
| E7ETK0     | 40S ribosomal protein S24                                        | RPS24      | 4               | 26.7                  | 0       | 49.47 | 0.74                        | 0.78                        | 0.90                        | 0.94                 | 0.82                 | 0.74                 | 0.74                           | 0.74                           | 0.67                           |
| A0A087WUT6 | Eukaryotic translation initiation<br>factor 5B                   | EIF5B      | 18              | 21.7                  | 0       | 38.88 | 1.31                        | 0.93                        | 1.03                        | 1.16                 | 0.77                 | 0.91                 | NaN                            | 0.98                           | 0.99                           |
| A0A087WV05 | C-Myc-binding protein                                            | MYCBP      | 2               | 28.2                  | 0       | 7.662 | NaN                         | NaN                         | 0.75                        | NaN                  | 1.17                 | NaN                  | NaN                            | 0.99                           | 1.18                           |
| A0A087WVQ6 | Clathrin heavy chain;Clathrin<br>heavy chain 1                   | CLTC       | 58              | 51.7                  | 0       | 323.3 | 1.05                        | 1.01                        | 1.06                        | 1.01                 | 1.01                 | 1.05                 | 0.97                           | 0.99                           | 1.00                           |
| A0A087WW4  | Endophilin-B1                                                    | SH3GLB1    | 7               | 28.4                  | 0       | 28.76 | 1.16                        | NaN                         | 1.80                        | 2.06                 | 0.71                 | 0.77                 | 0.91                           | 2.76                           | 0.98                           |
| A0A087WWJ1 | DNA mismatch repair protein                                      | MSH6       | 4               | 4.6                   | 0       | 3.205 | NaN                         | NaN                         | NaN                         | 0.73                 | 0.67                 | 0.59                 | 0.76                           | 0.77                           | NaN                            |
| A0A087WWU  |                                                                  | TPM3       | 0               | 81.1                  | 0       | 323.3 | 1.03                        | 1.00                        | 1.02                        | 0.99                 | 1.08                 | 0.97                 | 0.99                           | 1.07                           | 0.98                           |
| Q8IXW7     | Fragile X mental retardation<br>protein 1                        | FMR1       | 1               | 7.4                   | 1E-03   | 2.234 | 1.13                        | 1.76                        | 1.32                        | NaN                  | NaN                  | NaN                  | NaN                            | NaN                            | NaN                            |
| A0A087WXM  | 60S ribosomal protein L17                                        | RPL17      | 7               | 37.9                  | 0       | 97.17 | 0.81                        | 0.68                        | 0.88                        | 0.89                 | 0.83                 | 0.83                 | 0.79                           | 0.86                           | 1.12                           |

|            |                                                                                                    |         |    |      |       |       |      |      |      |      |      |      |      |      |      |
|------------|----------------------------------------------------------------------------------------------------|---------|----|------|-------|-------|------|------|------|------|------|------|------|------|------|
| A0A087WXR5 | NADH dehydrogenase [ubiquinone] 1 alpha subcomplex subunit 5                                       | NDUFA5  | 1  | 33.8 | 0     | 54.98 | 0.97 | 1.01 | 1.05 | NaN  | NaN  | 0.86 | NaN  | NaN  | 1.18 |
| A0A087WY55 | Vacuolar protein sorting-associated protein VTA1                                                   | VTA1    | 5  | 27.9 | 0     | 10.58 | NaN  | 0.94 | 0.70 | 1.11 | NaN  | 0.93 | 1.09 | NaN  | 0.90 |
| A0A087WY71 | AP-2 complex subunit mu                                                                            | AP2M1   | 6  | 15.2 | 0     | 27.73 | 0.76 | 0.86 | 0.83 | 0.96 | NaN  | 0.91 | 1.23 | 1.12 | 1.16 |
| A0A087WYN9 | ATP-dependent RNA helicase DHX29                                                                   | DHX29   | 1  | 1.1  | 5E-04 | 2.859 | 0.63 | 0.58 | NaN  | NaN  | NaN  | NaN  | NaN  | NaN  | NaN  |
| A0A087WYS1 | UTP--glucose-1-phosphate uridylyltransferase                                                       | UGP2    | 9  | 38   | 0     | 145   | 0.90 | 0.96 | 0.85 | 0.97 | 0.94 | 0.95 | 0.92 | 1.34 | 1.05 |
| A0A087WZF1 | Lipoma-preferred partner                                                                           | LPP     | 6  | 19.8 | 0     | 92.35 | 1.11 | NaN  | 1.35 | 1.12 | 1.32 | 1.00 | 0.99 | 0.97 | 1.62 |
| A0A087X020 | Ribosome maturation protein SBDS                                                                   | SBDS    | 11 | 39.6 | 0     | 30.45 | 1.00 | 0.99 | 1.09 | 1.49 | 1.08 | 1.15 | 1.59 | 1.12 | 0.90 |
| J3KN36     | Nodal modulator 1;Nodal modulator 3;Nodal modulator 2                                              | NOMO3   | 5  | 5.6  | 0     | 4.633 | NaN  | NaN  | 0.54 | 0.50 | 0.36 | 0.83 | 0.71 | 0.79 | 0.55 |
| J3QT73     | COP9 signalosome complex subunit 7b                                                                | COPS7B  | 1  | 5.2  | 0.006 | 1.706 | 1.00 | 1.43 | 0.60 | 1.43 | NaN  | NaN  | NaN  | 1.14 | 0.13 |
| A0A087X1Z3 | Proteasome activator complex subunit 2                                                             | PSME2   | 13 | 61   | 0     | 142   | 1.11 | 1.15 | 1.25 | 1.12 | 1.03 | 1.24 | 1.08 | 1.17 | 1.11 |
| A0A087X2D8 | C-Jun-amino-terminal kinase-interacting protein 4                                                  | SPAG9   | 7  | 8.1  | 0     | 6.925 | NaN  | 0.77 | 0.74 | NaN  | NaN  | NaN  | NaN  | NaN  | NaN  |
| F1T0B3     | ATP-dependent RNA helicase DDX1                                                                    | DDX1    | 11 | 23.1 | 0     | 42.57 | 0.89 | 0.72 | 0.89 | 0.87 | 0.52 | 0.63 | 1.22 | 0.82 | 0.75 |
| A0A087X211 | 26S protease regulatory subunit 10B                                                                | PSMC6   | 15 | 48.6 | 0     | 79.13 | 1.16 | 1.10 | 1.15 | 1.05 | 1.22 | 1.03 | 1.07 | 1.09 | 1.03 |
| A0A0A0MR02 | Voltage-dependent anion-selective channel protein 2                                                | VDAC2   | 12 | 51.1 | 0     | 323.3 | 1.08 | 1.22 | 1.02 | 1.00 | 1.06 | 1.03 | 1.05 | 1.03 | 1.24 |
| B9ZVX7     | 4;Glutathione S-transferase Mu 1;Glutathione S-transferase Mu 5                                    | GSTM1   | 2  | 28.2 | 0     | 8.262 | 0.49 | 0.60 | 0.43 | NaN  | 0.62 | 0.77 | NaN  | 1.25 | 0.77 |
| A0A0A0MRA5 | Heterogeneous nuclear ribonucleoprotein U-like protein 1                                           | HNRNPUL | 14 | 22.3 | 0     | 33.05 | 0.82 | 0.94 | 0.96 | 1.04 | 0.91 | 0.79 | 0.98 | 1.08 | 0.96 |
| A0A0A0MRF9 | Phosphoinositide phospholipase C;1-phosphatidylinositol 4,5-bisphosphate phosphodiesterase gamma-2 | PLCG2   | 1  | 1    | 0.008 | 1.522 | 1.38 | 1.32 | 1.26 | NaN  | 1.26 | 1.20 | NaN  | 1.88 | 1.54 |
| A0A0A0MRI2 | Sorting nexin-6;Sorting nexin-6, N-terminally processed                                            | SNX6    | 5  | 11.7 | 0     | 5.436 | NaN  | 0.90 | 0.91 | 0.70 | 1.33 | NaN  | NaN  | 0.92 | 1.03 |
| F6S8N6     | Protein-L-isoaspartate O-methyltransferase;Protein-L-isoaspartate(D-aspartate) O-methyltransferase | PCMT1   | 8  | 54   | 0     | 98.42 | 1.02 | 1.09 | 1.13 | 1.22 | 1.13 | 0.99 | 1.61 | 1.78 | 1.02 |
| A0A0A0MRM  | Unconventional myosin-VI                                                                           | MYO6    | 15 | 18.8 | 0     | 43.09 | 2.03 | 0.97 | 1.89 | 1.42 | 1.43 | 1.03 | 0.63 | 0.95 | 0.76 |
| A0A0A0MRR7 | U1 small nuclear ribonucleoprotein C                                                               | SNRPC   | 3  | 21.7 | 0     | 34.23 | 1.08 | 0.96 | 1.16 | 0.96 | 0.96 | 0.90 | 1.08 | 1.09 | 0.99 |
| J3KNW4     | Four and a half LIM domains protein 2                                                              | FHL2    | 7  | 21.3 | 0     | 32.29 | 1.06 | 1.10 | 0.96 | 1.24 | 0.89 | 1.49 | 1.13 | 0.87 | NaN  |

|            |                                                                               |          |    |      |       |       |      |      |      |      |      |      |      |      |      |
|------------|-------------------------------------------------------------------------------|----------|----|------|-------|-------|------|------|------|------|------|------|------|------|------|
| A0A0G2JKZ1 | Tapasin                                                                       | TAPBP    | 5  | 16.7 | 0     | 7.431 | 0.74 | 0.72 | 0.80 | 0.98 | 0.99 | 1.19 | 0.90 | NaN  | 0.89 |
| B3KYB6     | Phosphatidylinositol transfer protein beta isoform                            | PITPNB   | 4  | 38.3 | 0     | 5.232 | 1.02 | 0.94 | NaN  | NaN  | NaN  | 1.44 | NaN  | NaN  | 1.28 |
| A0A0A0MTH3 | Integrin-linked protein kinase                                                | ILK      | 9  | 23.6 | 0     | 15.01 | NaN  | NaN  | 1.94 | NaN  | 0.83 | 0.80 | NaN  | NaN  | 1.21 |
| A0A0R4J2G3 | Neutral cholesterol ester hydrolase 1                                         | NCEH1    | 6  | 21.4 | 0     | 69.66 | 1.04 | 0.75 | 0.95 | 1.07 | 1.10 | 0.78 | 0.75 | 0.88 | 0.84 |
| Q5T2B5     | Cullin-2 Hydroxypyruvate                                                      | CUL2     | 3  | 5.7  | 0.008 | 1.484 | NaN  | 0.68 | NaN  | 0.69 | 1.06 | NaN  | NaN  | NaN  | NaN  |
| F6UJY9     | isomerase;Putative hvdroxypyruvate isomerase                                  | HYI      | 4  | 38.5 | 0     | 23.56 | 1.27 | NaN  | NaN  | 0.64 | 0.39 | NaN  | 0.95 | 1.22 | 0.81 |
| A0A0A0MTS2 | Glucose-6-phosphate isomerase                                                 | GPI      | 22 | 44.9 | 0     | 323.3 | 0.94 | 0.98 | 0.98 | 1.04 | 1.01 | 1.08 | 0.95 | 1.01 | 1.06 |
| A0A0A0MTS7 | Titin                                                                         | TTN      | 7  | 0.3  | 5E-04 | 2.855 | 2.48 | 1.85 | 1.48 | NaN  | 1.37 | NaN  | NaN  | 1.45 | 1.08 |
| A0A0A6YYL4 | Coronin;Coronin-7                                                             | CORO7-P/ | 4  | 7.8  | 0     | 4.627 | 0.85 | NaN  | NaN  | 0.49 | 0.88 | 0.95 | NaN  | NaN  | NaN  |
| A0A0B4J1Z1 | Serine/arginine-rich splicing factor 7                                        | SRSF7    | 7  | 54.7 | 0     | 12.37 | 1.11 | 1.03 | 1.02 | 0.74 | 0.77 | 1.16 | NaN  | 0.79 | 1.04 |
| A0A0C4DFT3 | Disks large homolog 1                                                         | DLG1     | 6  | 10.1 | 0     | 16.77 | 1.73 | 0.77 | 1.43 | 0.88 | NaN  | 1.01 | NaN  | NaN  | 1.06 |
| A0A0C4DFV9 | Protein SET;Protein SETSIP                                                    | SET      | 6  | 27.8 | 0     | 323.3 | 1.11 | 1.08 | 1.04 | 1.14 | 1.07 | 1.10 | 1.05 | 1.09 | 1.07 |
| C9J9K3     | 40S ribosomal protein SA                                                      | RPSA     | 6  | 65.8 | 0     | 323.3 | 1.05 | 1.11 | 1.23 | 0.95 | 1.03 | 1.02 | 1.14 | 0.96 | 1.05 |
| E7ENN3     | Nesprin-1                                                                     | SYNE1    | 3  | 0.6  | 0.008 | 1.526 | 0.88 | 1.10 | 1.77 | NaN  | NaN  | 1.03 | NaN  | NaN  | NaN  |
| A0A0C4DG44 | Serine protease HTRA2, mitochondrial                                          | HTRA2    | 1  | 5.7  | 0     | 5.089 | 1.65 | 1.58 | 1.34 | NaN  | 1.10 | NaN  | NaN  | NaN  | 1.21 |
| A0A0C4DG49 | Poliovirus receptor                                                           | PVR      | 1  | 3.4  | 0     | 64.55 | 1.47 | 1.59 | 1.38 | 0.99 | 1.13 | NaN  | NaN  | 1.06 | 1.06 |
| A0A0C4DG89 | Probable ATP-dependent RNA helicase DDX46                                     | DDX46    | 8  | 10.1 | 0     | 10.61 | 1.38 | 0.80 | 1.33 | 0.56 | 0.72 | 1.94 | NaN  | NaN  | 0.83 |
| A0A0C4DGA2 | Enoyl-CoA delta isomerase 2, mitochondrial                                    | ECI2     | 8  | 30.2 | 0     | 14.07 | 1.03 | 0.51 | NaN  | 0.60 | 0.72 | 1.12 | NaN  | NaN  | NaN  |
| A0A0C4DGB0 | Short coiled-coil protein                                                     | SCOC     | 1  | 22   | 0     | 22.86 | 0.97 | 1.31 | 1.09 | NaN  | NaN  | 1.13 | NaN  | NaN  | 1.10 |
| A0A0C4DGB5 | Calpastatin                                                                   | CAST     | 16 | 54   | 0     | 323.3 | 0.88 | 0.90 | 0.88 | 1.11 | 1.12 | 1.07 | 1.01 | 1.00 | 0.91 |
| A0A2R8Y8B3 | Chromodomains-helicase-DNA-binding protein 4                                  | CHD4     | 3  | 4.9  | 0     | 7.371 | 0.67 | 0.93 | 0.87 | NaN  | NaN  | NaN  | 1.55 | NaN  | 1.28 |
| A0A0C4DGQ  | Calpain small subunit 1                                                       | CAPNS1   | 8  | 51.9 | 0     | 323.3 | 1.00 | 0.93 | 0.98 | 1.02 | 1.10 | 1.07 | 1.16 | 1.36 | 1.09 |
| A0A0C4DGS1 | Dolichyl-diphosphooligosaccharide--protein glycosyltransferase 48 kDa subunit | DDOST    | 7  | 24.4 | 0     | 36.77 | 1.08 | 0.92 | 1.13 | 1.04 | 0.90 | 1.15 | 0.99 | 0.99 | 0.99 |
| F6S8Q4     | ATP-dependent RNA helicase DDX3X;ATP-dependent RNA helicase DDX3Y             | DDX3X    | 19 | 40.1 | 0     | 70.33 | 1.00 | 1.09 | 1.08 | 0.78 | 1.08 | 0.97 | 1.02 | 0.92 | 0.96 |
| A0A0D9SFK2 | Unconventional myosin-XVIIIa                                                  | MYO18A   | 5  | 3    | 0     | 17.1  | 0.93 | 1.06 | 0.95 | 1.07 | 0.78 | 0.92 | NaN  | 1.02 | 0.98 |
| A0A0D9SFM0 | E3 ubiquitin-protein ligase                                                   | SHPRH    | 3  | 2.3  | 0.008 | 1.521 | 1.21 | NaN  | 1.22 | 1.54 | NaN  | 1.07 | NaN  | NaN  | 1.11 |
| A0A1W2PNM1 | Hydroxyacyl-coenzyme A dehydrogenase, mitochondrial                           | HADH     | 5  | 26.2 | 0     | 43.04 | 0.81 | 0.91 | NaN  | 1.14 | 1.18 | 0.96 | 1.14 | 0.85 | NaN  |
| A0A1B0GWF  | Syntaxin-binding protein 1                                                    | STXBP1   | 3  | 12.2 | 0     | 4.767 | NaN  | 1.68 | 1.11 | NaN  | NaN  | 0.95 | NaN  | NaN  | NaN  |
| A0A140T8Z0 | Protein diaphanous homolog 1                                                  | DIAPH1   | 16 | 16.6 | 0     | 18.03 | 0.91 | 0.75 | 0.96 | 1.00 | NaN  | 0.77 | 0.99 | 0.75 | 1.03 |
| A0A0G2JHC2 | Phostensin                                                                    | PPP1R18  | 2  | 4.2  | 0     | 14.06 | 0.78 | NaN  | 1.21 | NaN  | NaN  | NaN  | NaN  | NaN  | NaN  |
| A0A0G2JIW1 | Heat shock 70 kDa protein 1B;Heat shock 70 kDa protein 1A                     | HSPA1B   | 19 | 68.7 | 0     | 323.3 | 2.70 | 3.13 | 2.66 | 2.64 | 2.57 | 2.59 | 0.91 | 0.92 | 0.91 |

|            |                                                                                                                                                                                                                                     |          |    |      |       |       |      |      |      |      |      |      |      |      |      |
|------------|-------------------------------------------------------------------------------------------------------------------------------------------------------------------------------------------------------------------------------------|----------|----|------|-------|-------|------|------|------|------|------|------|------|------|------|
| A0A0J9YYL3 | Poly(U)-binding-splicing factor PUF60                                                                                                                                                                                               | PUF60    | 10 | 30.9 | 0     | 18.7  | 1.11 | 1.24 | NaN  | 0.82 | NaN  | 1.17 | NaN  | 2.57 | NaN  |
| C9JB42     | DnaJ homolog subfamily B member 3;DnaJ homolog subfamily B member 6                                                                                                                                                                 | DNAJB6   | 1  | 19.7 | 0     | 28.37 | 2.28 | NaN  | 2.53 | NaN  | NaN  | NaN  | NaN  | NaN  | NaN  |
| A0A0R4J2E8 | Matrin-3                                                                                                                                                                                                                            | MATR3    | 26 | 37.8 | 0     | 207.3 | 1.08 | 0.86 | 1.00 | 1.06 | 1.01 | 1.04 | 0.94 | 0.77 | 0.69 |
| A0A0R4J2F3 |                                                                                                                                                                                                                                     |          | 1  | 18.1 | 5E-04 | 2.832 | 0.90 | NaN  | 0.61 | NaN  | NaN  | NaN  | NaN  | NaN  | NaN  |
| A0A0U1RQC9 | Cellular tumor antigen p53<br>Histone H2A type 1-J;Histone H2A type 1-H;Histone H2A.J;Histone H2A type 2-C;Histone H2A type 2-A;Histone H2A type 1-D;Histone H2A type 1;Histone H2A;Histone H2A type 1-C;Histone H2A type 3;Histone | TP53     | 6  | 19.5 | 0     | 25.15 | 0.34 | NaN  | 0.30 | NaN  | NaN  | NaN  | NaN  | NaN  | 1.40 |
| A0A0U1RR32 |                                                                                                                                                                                                                                     | HIST1H2A | 2  | 27.2 | 0     | 246.9 | 0.63 | 0.61 | 0.68 | 1.14 | 0.94 | 0.74 | 0.43 | NaN  | NaN  |
| A0A0U1RRL7 |                                                                                                                                                                                                                                     |          | 3  | 87.3 | 0     | 40.97 | 1.32 | 1.16 | 1.13 | 1.18 | 0.91 | 1.30 | 1.43 | 1.32 | 1.38 |
| A0A0U1RRM4 | Polypyrimidine tract-binding protein 1                                                                                                                                                                                              | PTBP1    | 2  | 52.2 | 0     | 323.3 | 0.99 | 1.06 | 1.08 | 0.94 | 1.00 | 0.94 | 0.77 | 0.91 | 0.95 |
| A0A0U1RRM  | Fermitin family homolog 2<br>HLA class I histocompatibility antigen, A-2 alpha chain;HLA class I histocompatibility antigen, A-74 alpha chain                                                                                       | FERMT2   | 3  | 8.8  | 0     | 61    | NaN  | NaN  | 1.44 | NaN  | 1.41 | 1.33 | NaN  | NaN  | 1.06 |
| A0A140T9I0 | Proteasome subunit beta type-8                                                                                                                                                                                                      | HLA-A    | 0  | 54   | 0     | 323.3 | 0.97 | 0.97 | 1.04 | 1.06 | 1.08 | 1.15 | 1.00 | 0.95 | 0.98 |
| Q5JNW7     |                                                                                                                                                                                                                                     | PSMB8    | 2  | 10.3 | 0     | 4.054 | 1.08 | NaN  | 1.03 | 1.03 | NaN  | 0.75 | 1.07 | NaN  | 0.77 |
| A0A140T9R1 | Flotillin-1                                                                                                                                                                                                                         | FLOT1    | 6  | 21.6 | 0     | 61.35 | 0.91 | 0.75 | 1.39 | 0.82 | 0.75 | NaN  | 0.91 | 1.01 | NaN  |
| A0A1B0GTG2 | Alpha-aminoadipic semialdehyde dehydrogenase                                                                                                                                                                                        | ALDH7A1  | 16 | 43.3 | 0     | 69.66 | 0.94 | 0.83 | 1.04 | 0.64 | 0.97 | 0.95 | 0.81 | 0.76 | 0.95 |
| A0A1B0GWJ0 | Adenylosuccinate lyase                                                                                                                                                                                                              | ADSL     | 10 | 34.6 | 0     | 57.49 | 1.31 | 0.90 | 0.91 | 0.82 | 1.00 | 1.25 | 0.84 | 1.03 | 1.13 |
| F5GZ78     | Paxillin                                                                                                                                                                                                                            | PXN      | 9  | 21.2 | 0     | 159.8 | 1.29 | 1.76 | 1.72 | 1.32 | 1.33 | 1.36 | 1.30 | 0.99 | 1.73 |
| A0A1B0GUA3 | KIF1-binding protein                                                                                                                                                                                                                | KIAA1279 | 1  | 2.9  | 0     | 8.056 | 1.75 | 1.54 | NaN  | NaN  | NaN  | 1.47 | NaN  | NaN  | 1.71 |
| A0A1B0GVD5 | Cathepsin D;Cathepsin D light chain;Cathepsin D heavy chain                                                                                                                                                                         | CTSD     | 18 | 50.4 | 0     | 236.5 | 0.92 | 0.94 | 0.87 | 1.11 | 1.06 | 1.15 | 0.93 | 0.87 | 0.96 |
| A0A1C7CYX9 | Dihydropyrimidinase-related protein 2<br>DNA-directed RNA                                                                                                                                                                           | DPYSL2   | 24 | 52.4 | 0     | 323.3 | 0.88 | 0.68 | 0.74 | 0.94 | 0.96 | 0.76 | 0.61 | 0.75 | 0.74 |
| C9J4M6     | polymerase;DNA-directed RNA polymerase II subunit RPB2                                                                                                                                                                              | POLR2B   | 4  | 5.5  | 0     | 5.379 | NaN  | NaN  | NaN  | NaN  | NaN  | NaN  | 0.19 | 0.18 | NaN  |
| A0A1W2PPZ5 | Transcription elongation factor A protein 1                                                                                                                                                                                         | TCEA1    | 3  | 12   | 0     | 4.836 | 0.91 | 0.82 | 1.25 | NaN  | NaN  | 1.25 | 1.08 | 1.24 | 1.04 |
| E9PJA7     | Bcl-2-associated transcription factor 1                                                                                                                                                                                             | BCLAF1   | 4  | 12.8 | 0     | 48.17 | 1.10 | 0.99 | 1.22 | 0.71 | 1.02 | 1.11 | 1.07 | 0.81 | 1.03 |
| A0A1X7SBZ2 | Probable ATP-dependent RNA helicase DDX17                                                                                                                                                                                           | DDX17    | 15 | 36.6 | 0     | 134.6 | 0.85 | 0.91 | 0.83 | 0.68 | 0.79 | 0.90 | 0.83 | 0.79 | 1.19 |
| C9JP51     | Protein FAM131A                                                                                                                                                                                                                     | FAM131A  | 1  | 6.1  | 0     | 2.987 | 1.44 | 1.98 | 1.63 | NaN  | 2.02 | 1.61 | NaN  | NaN  | NaN  |

|            |                                                                                                                                                                                                                       |         |    |      |       |       |      |      |      |      |      |      |      |      |      |
|------------|-----------------------------------------------------------------------------------------------------------------------------------------------------------------------------------------------------------------------|---------|----|------|-------|-------|------|------|------|------|------|------|------|------|------|
| A0A1W2PQV2 | Glycine cleavage system H protein, mitochondrial Phosphatidylinositol 3-                                                                                                                                              | GCSH    | 2  | 30   | 0     | 3.652 | NaN  | NaN  | NaN  | 1.25 | 1.29 | NaN  | 1.55 | 0.86 | NaN  |
| A8MYT4     | kinase;Phosphatidylinositol 3-kinase catalytic subunit type 3 Dynamin-like 120 kDa protein,                                                                                                                           | PIK3C3  | 1  | 1    | 0.009 | 1.455 | 1.04 | 1.14 | 1.10 | 1.07 | 0.98 | 1.13 | 1.11 | 1.12 | 1.37 |
| A0A2R8Y3X5 | mitochondrial;Dynamin-like 120 kDa protein, form S1                                                                                                                                                                   | OPA1    | 8  | 13.7 | 0     | 19.31 | 0.30 | 0.95 | NaN  | NaN  | NaN  | 1.46 | NaN  | NaN  | NaN  |
| A0A2R8Y430 | Glutathione synthetase                                                                                                                                                                                                | GSS     | 15 | 45.1 | 0     | 80.66 | 1.15 | 0.94 | 0.97 | 1.01 | 1.10 | 0.96 | 1.07 | 1.08 | 0.99 |
| A6NNI4     | Tetraspanin;CD9 antigen                                                                                                                                                                                               | CD9     | 5  | 34   | 0     | 11.58 | 1.09 | 1.04 | 1.13 | 1.00 | 1.07 | 0.79 | 0.66 | 0.88 | 1.47 |
| A0A2R8Y484 | Leukocyte surface antigen CD47 SWI/SNF-related matrix-associated actin-dependent regulator of chromatin subfamily E member 1                                                                                          | CD47    | 3  | 15.3 | 0     | 3.662 | 0.85 | 1.55 | 1.73 | 1.06 | 1.61 | 0.85 | 0.90 | 1.39 | 0.94 |
| H7C048     | DNA-directed RNA polymerases I and III subunit RPAC1                                                                                                                                                                  | SMARCE1 | 1  | 8.3  | 0.009 | 1.431 | 0.96 | NaN  | 1.14 | NaN  | NaN  | NaN  | NaN  | NaN  | 0.77 |
| A0A2R8YEZ4 | Tubulin-specific chaperone E                                                                                                                                                                                          | POLR1C  | 2  | 10.1 | 0     | 15.31 | 0.98 | 1.29 | NaN  | NaN  | 1.02 | NaN  | 0.95 | 1.13 | NaN  |
| A0A2R8Y7E7 | Radixin                                                                                                                                                                                                               | TBCE    | 5  | 11.1 | 0     | 4.228 | 0.74 | 0.86 | 1.43 | NaN  | 1.03 | NaN  | NaN  | NaN  | 0.77 |
| A0A2R8Y5S7 |                                                                                                                                                                                                                       | RDX     | 13 | 45.9 | 0     | 67.06 | NaN  | 1.25 | 1.39 | 1.20 | 1.89 | NaN  | 0.97 | 0.75 | 0.91 |
| A0A2R8Y793 | Ribose-phosphate pyrophosphokinase 1                                                                                                                                                                                  |         | 1  | 90   | 0.003 | 1.862 | NaN  | 0.85 | NaN  | NaN  | NaN  | 0.91 | 0.70 | 0.92 | 0.91 |
| B1ALA9     | 40S ribosomal protein S14                                                                                                                                                                                             | PRPS1   | 2  | 35.4 | 0     | 15.4  | 0.71 | 0.84 | 1.00 | 0.53 | 0.98 | 1.05 | 0.86 | 0.75 | 0.90 |
| A0A2R8Y811 | Tripeptidyl-peptidase 1                                                                                                                                                                                               | RPS14   | 8  | 41.3 | 0     | 55.93 | 0.95 | 0.91 | 0.98 | 0.86 | 0.97 | 0.82 | 0.95 | 1.02 | 0.90 |
| A0A2R8YGD1 | Peroxisomal multifunctional enzyme type 2;(3R)-hydroxyacyl-CoA dehydrogenase;Enoyl-CoA hydratase 2                                                                                                                    | TPP1    | 3  | 9.8  | 0     | 5.059 | 0.81 | NaN  | NaN  | NaN  | 0.84 | 1.10 | NaN  | NaN  | 0.73 |
| A0A2R8YD50 | Casein kinase II subunit alpha 3;Casein kinase II subunit alpha                                                                                                                                                       | HSD17B4 | 7  | 14.8 | 0     | 12.18 | 1.06 | 1.01 | 1.49 | NaN  | NaN  | NaN  | NaN  | NaN  | NaN  |
| A0A2R8YF43 | Flavin reductase (NADPH)                                                                                                                                                                                              | CSNK2A1 | 5  | 23.1 | 0     | 23.85 | 1.27 | 1.04 | 1.04 | 1.16 | 1.22 | 1.40 | 0.84 | 0.80 | 1.38 |
| A0A2R8YEA7 | Protein transport protein Sec23B                                                                                                                                                                                      |         | 2  | 76.4 | 0     | 92.95 | 1.76 | 1.63 | 1.69 | 1.66 | 1.73 | 1.88 | 1.90 | 1.89 | 1.37 |
| A0A2R8YEP4 | Elongation factor 1-alpha 2                                                                                                                                                                                           | BLVRB   | 5  | 31.4 | 0     | 54.92 | 1.25 | 1.38 | 0.94 | 1.03 | 1.24 | 1.17 | 1.20 | 1.20 | 0.83 |
| A0A2R8YFH5 | CD59 glycoprotein                                                                                                                                                                                                     | SEC23B  | 4  | 12.1 | 0     | 6.65  | NaN  | 0.91 | 1.07 | 0.90 | NaN  | NaN  | NaN  | 1.27 | 1.15 |
| A0A2U3TZH3 | C-1-tetrahydrofolate synthase, cytoplasmic;Methylenetetrahydrofolate dehydrogenase;Methenyltetrahydrofolate cyclohydrolase;Formyltetrahydrofolate synthetase;C-1-tetrahydrofolate synthase, cytoplasmic, N-terminally | EEF1A2  | 3  | 44   | 0     | 11    | 0.28 | 0.29 | NaN  | 0.94 | NaN  | 0.44 | NaN  | NaN  | 0.20 |
| E9PNW4     | CTP synthase 1;CTP synthase                                                                                                                                                                                           | CD59    | 4  | 29.6 | 0     | 55.51 | 1.06 | 1.04 | 1.09 | 1.07 | 0.96 | 1.03 | 1.16 | 1.19 | 1.05 |
| V9GYY3     |                                                                                                                                                                                                                       | MTHFD1  | 35 | 46.4 | 0     | 140.7 | 0.67 | 0.72 | 0.76 | 0.73 | 0.87 | 0.79 | 0.79 | 0.78 | 0.67 |
| A0A3B3IRI2 |                                                                                                                                                                                                                       | CTPS1   | 11 | 25.2 | 0     | 31.69 | 1.03 | 1.16 | 1.09 | 1.03 | 0.84 | 0.90 | 1.21 | 1.16 | 1.10 |

|            |                                                              |         |    |      |       |       |      |      |      |      |      |      |      |      |      |
|------------|--------------------------------------------------------------|---------|----|------|-------|-------|------|------|------|------|------|------|------|------|------|
| A0A3B3IRK6 | Mannosyl-oligosaccharide glucosidase                         | MOGS    | 11 | 20.6 | 0     | 27.05 | 1.20 | 1.06 | 1.11 | 1.14 | 0.82 | 1.07 | 0.91 | 1.02 | 0.97 |
| A0A3B3IRT8 | Translocon-associated protein subunit alpha                  | SSR1    | 4  | 20.8 | 0     | 46.35 | 0.79 | 0.88 | 0.91 | 0.92 | 0.90 | 0.86 | 1.02 | 1.03 | 1.11 |
| A0A3B3IS06 | Treacle protein                                              | TCOF1   | 5  | 4.1  | 0     | 6.04  | 1.18 | 1.08 | 0.92 | 0.81 | NaN  | 1.58 | 0.94 | 0.82 | 1.08 |
| A0A3B3IS84 | Coatomer subunit alpha;Xenin;Proxenin                        | COPA    | 32 | 35.9 | 0     | 323.3 | 0.82 | 0.75 | 0.81 | 0.73 | 0.77 | 0.78 | 0.97 | 0.84 | 0.90 |
| B4DKB2     | Endothelin-converting enzyme 1                               | ECE1    | 3  | 7.3  | 0     | 40.4  | 0.80 | NaN  | 0.68 | NaN  | NaN  | NaN  | NaN  | NaN  | 0.92 |
| A0A3B3ISG5 | Insulin-degrading enzyme                                     | IDE     | 3  | 5.7  | 0     | 5.832 | 0.48 | NaN  | NaN  | NaN  | NaN  | 0.77 | NaN  | 0.75 | 0.89 |
| A0A3B3ISV4 | Vitamin K epoxide reductase complex subunit 1-like protein 1 | VKORC1L | 1  | 4.9  | 0.001 | 2.745 | 1.05 | 1.02 | 0.99 | 1.23 | 0.98 | 2.02 | 0.78 | 1.44 | 1.08 |
| A0A3B3IUC9 | Acylglycerol kinase, DNA replication licensing factor        | AGK     | 2  | 27.6 | 0.007 | 1.613 | 0.89 | NaN  | 1.15 | 0.73 | NaN  | 0.99 | NaN  | NaN  | 0.62 |
| A0A3B3IT92 | MCM4                                                         | MCM4    | 10 | 17.7 | 0     | 20.16 | NaN  | 0.63 | NaN  | NaN  | 1.03 | 0.72 | NaN  | NaN  | 0.67 |
| A0A3B3ITF0 | m7GpppX diphosphatase                                        | DCPS    | 3  | 17.2 | 0     | 3.726 | 0.91 | 0.92 | 1.02 | 0.57 | 0.71 | NaN  | 1.00 | 0.60 | 3.48 |
| A0A3B3ITN8 | Retinoic acid-induced protein 3                              | GPRC5A  | 4  | 12.4 | 0     | 7.827 | NaN  | NaN  | NaN  | 0.80 | 0.82 | 0.66 | NaN  | NaN  | 0.81 |
| A0A3B3ITT5 | 60S ribosomal protein L29                                    | RPL29   | 2  | 13.8 | 0     | 36.32 | 1.24 | 1.59 | 1.18 | 1.14 | 1.32 | 1.28 | 1.18 | 1.11 | 1.20 |
| E9PN17     | ATP synthase subunit g, mitochondrial                        | ATP5L   | 2  | 31.6 | 0     | 4.062 | 1.54 | 1.19 | 1.16 | 0.94 | 1.54 | 1.69 | 1.10 | 0.76 | 1.94 |
| A0A3B3ITZ9 | Thyroid hormone receptor-associated protein 3                | THRAP3  | 9  | 13.8 | 0     | 17.51 | 1.25 | NaN  | 1.11 | 1.27 | 0.98 | 0.90 | 1.31 | 1.33 | 1.33 |
| A0A3B3IUA2 |                                                              | NHP2L1  | 2  | 16.9 | 0     | 77.82 | 0.94 | 1.06 | 0.97 | 1.30 | 1.15 | 1.24 | 0.89 | 1.04 | 1.09 |
| A0A3B3IUB1 | Translation initiation factor eIF-2B subunit epsilon         | EIF2B5  | 2  | 3    | 0     | 3.485 | 1.13 | 1.00 | 0.85 | 1.32 | 1.13 | 0.89 | 1.09 | NaN  | 0.96 |
| A0A3B3IUB5 | Minor histocompatibility antigen H13                         | HM13    | 7  | 20.7 | 0     | 111.4 | 1.02 | 0.91 | 0.91 | 1.36 | 1.15 | 1.04 | 1.28 | NaN  | 1.66 |
| A0A3F2YNY6 | Pre-mRNA-processing factor 40 homolog A                      | PRPF40A | 6  | 8.4  | 0     | 14.71 | 0.51 | 0.80 | 0.49 | 0.91 | 2.07 | NaN  | NaN  | 0.83 | 0.71 |
| A0A494C017 | Myeloid-associated differentiation marker                    | MYADM   | 2  | 27   | 0     | 323.3 | 1.12 | 0.94 | 0.89 | 0.87 | 1.27 | 0.87 | 3.59 | 3.89 | 1.04 |
| H0Y993     | Protein DEK                                                  | DEK     | 9  | 24.2 | 0     | 26.45 | 0.66 | 0.79 | 1.01 | 0.75 | 0.76 | 1.08 | 0.91 | 0.82 | 0.65 |
| A0A494C039 | Hypoxia up-regulated protein 1                               | HYOU1   | 28 | 36.9 | 0     | 209.8 | 0.84 | 0.88 | 0.83 | 0.95 | 0.90 | 0.98 | 0.97 | 0.91 | 0.85 |
| A0A494C0B4 | UV excision repair protein RAD23 homolog A                   | RAD23A  | 4  | 20.9 | 0     | 3.135 | 0.90 | 1.02 | NaN  | 1.15 | 0.84 | 0.97 | 1.17 | NaN  | NaN  |
| A0A494C128 | Nucleolar protein 56                                         | NOP56   | 3  | 8.6  | 0     | 9.37  | NaN  | NaN  | 0.82 | 1.33 | 1.12 | NaN  | 1.18 | 1.22 | 1.06 |
| A0A494C1F2 | Nuclear pore complex protein Nup214                          | NUP214  | 4  | 2.3  | 0     | 3.742 | 1.60 | 1.64 | 1.92 | 1.46 | NaN  | NaN  | NaN  | NaN  | 1.47 |
| A0A494C1K3 | General transcription factor II-I                            | GTF2I   | 8  | 9.5  | 0     | 9.474 | NaN  | NaN  | NaN  | NaN  | 1.00 | 1.01 | NaN  | NaN  | NaN  |
| A0A494C1L1 | Lamin-B receptor                                             | LBR     | 5  | 14.4 | 0     | 41.92 | 0.99 | 0.84 | NaN  | NaN  | 0.94 | 0.87 | 0.84 | NaN  | NaN  |
| A0A494C1N0 | Peptidyl-prolyl cis-trans isomerase FKBP2                    | FKBP2   | 2  | 15.8 | 0     | 3.199 | NaN  | NaN  | NaN  | 1.79 | 0.98 | NaN  | NaN  | NaN  | NaN  |
| A0A499FIX8 | Extended synaptotagmin-2                                     | ESYT2   | 15 | 25.6 | 0     | 111.8 | 0.93 | 0.87 | 1.01 | 0.67 | 0.86 | 0.99 | 0.91 | 0.78 | 1.02 |
| H3BUX2     | Cytochrome b5 type B                                         | CYB5B   | 3  | 22.9 | 0     | 9.274 | 0.71 | 1.07 | 0.89 | NaN  | NaN  | 0.97 | NaN  | NaN  | NaN  |
| A0AVT1     | Ubiquitin-like modifier-activating enzyme 6                  | UBA6    | 15 | 18.4 | 0     | 19.74 | NaN  | NaN  | 0.69 | NaN  | 0.66 | 0.56 | NaN  | 1.84 | NaN  |
| M0R026     | Acetolactate synthase-like                                   | ILVBL   | 4  | 14.5 | 0     | 28.02 | NaN  | 1.60 | 1.37 | NaN  | 0.69 | NaN  | NaN  | NaN  | NaN  |
| A2A274     | Aconitate hydratase,                                         | ACO2    | 12 | 24.2 | 0     | 44.06 | 0.74 | 0.52 | 0.84 | NaN  | 0.81 | 0.82 | NaN  | NaN  | NaN  |

|        |                                                                                                                                                                                                                                                                                                                                                            |          |    |      |       |       |      |      |      |      |      |      |      |      |      |
|--------|------------------------------------------------------------------------------------------------------------------------------------------------------------------------------------------------------------------------------------------------------------------------------------------------------------------------------------------------------------|----------|----|------|-------|-------|------|------|------|------|------|------|------|------|------|
| A2A2V1 | Major prion protein<br>Microtubule-associated proteins                                                                                                                                                                                                                                                                                                     | PRNP     | 1  | 4.8  | 0     | 6.304 | 1.48 | 1.17 | 1.02 | NaN  | NaN  | 1.02 | NaN  | NaN  | 0.95 |
| H3BTL1 | 1A/1B light chain 3B;Microtubule-associated proteins 1A/1B light chain 3 beta 2<br>Host cell factor 1;HCF N-terminal chain 1;HCF N-terminal chain 2;HCF N-terminal chain 3;HCF N-terminal chain 4;HCF N-terminal chain 5;HCF N-terminal chain 6;HCF C-terminal chain 1;HCF C-terminal chain 2;HCF C-terminal chain 3;HCF C-terminal chain 4;HCF C-terminal | MAP1LC3E | 1  | 18.7 | 0     | 7.386 | 1.00 | 1.54 | NaN  | NaN  | NaN  | NaN  | NaN  | NaN  | 0.56 |
| A6NEM2 | ADP-sugar pyrophosphatase Hematological and neurological expressed 1-like protein                                                                                                                                                                                                                                                                          | HCFC1    | 2  | 1.6  | 0     | 3.005 | NaN  | NaN  | NaN  | NaN  | 1.54 | NaN  | 0.78 | 0.88 | NaN  |
| A6NFX8 | rRNA/tRNA 2-O-methyltransferase fibrillar-like                                                                                                                                                                                                                                                                                                             | NUDT5    | 8  | 33.2 | 0     | 59.09 | 0.91 | 0.92 | 0.72 | 1.50 | 1.29 | 1.20 | NaN  | NaN  | NaN  |
| A6NGP5 | Structural maintenance of chromosomes flexible hinge domain-containing protein 1                                                                                                                                                                                                                                                                           | HN1L     | 7  | 61.2 | 0     | 77.31 | 1.17 | 1.46 | 1.42 | 0.95 | 1.03 | 1.09 | 1.06 | 1.81 | 1.38 |
| A6NHQ2 | Protein cornichon homolog 4                                                                                                                                                                                                                                                                                                                                | FBLL1    | 1  | 6.6  | 0.001 | 2.363 | NaN  | 0.98 | NaN  | 0.79 | 1.04 | NaN  | 0.75 | 0.97 | NaN  |
| J3KTL8 | Tetraspanin;CD81 antigen                                                                                                                                                                                                                                                                                                                                   | SMCHD1   | 1  | 0.7  | 0.002 | 1.953 | 0.78 | 0.85 | 0.75 | NaN  | NaN  | 0.77 | NaN  | NaN  | 0.97 |
| A6NLH6 | Alpha-endosulfine                                                                                                                                                                                                                                                                                                                                          | CNIH4    | 1  | 14.6 | 0     | 15.56 | NaN  | 0.68 | NaN  | 1.24 | 1.09 | 1.17 | NaN  | NaN  | NaN  |
| E9PJK1 | Serine/threonine-protein phosphatase 2A activator                                                                                                                                                                                                                                                                                                          | CD81     | 3  | 35.8 | 0     | 40.33 | 1.09 | 1.02 | 1.07 | NaN  | NaN  | 1.26 | 0.85 | 0.74 | 1.19 |
| A6NMQ3 | Mesencephalic astrocyte-derived neurotrophic factor                                                                                                                                                                                                                                                                                                        | ENSA     | 3  | 32.9 | 0     | 180   | NaN  | NaN  | 1.27 | NaN  | NaN  | 1.54 | NaN  | 1.62 | 4.03 |
| Q5T949 | Mesencephalic astrocyte-derived neurotrophic factor                                                                                                                                                                                                                                                                                                        | PPP2R4   | 3  | 17.6 | 0.001 | 2.754 | 1.18 | NaN  | NaN  | NaN  | 1.59 | 1.13 | 1.04 | 1.41 | 0.94 |
| A8K878 | Small ubiquitin-related modifier 3                                                                                                                                                                                                                                                                                                                         | MANF     | 7  | 41.1 | 0     | 11.72 | 1.71 | 1.19 | 2.74 | 1.15 | 1.02 | 1.31 | 0.88 | NaN  | 1.59 |
| A8MUA9 | Small nuclear ribonucleoprotein G;Putative small nuclear ribonucleoprotein G-like protein                                                                                                                                                                                                                                                                  | SUMO3    | 1  | 15.6 | 1E-03 | 2.3   | NaN  | 0.91 | 1.12 | 0.85 | 1.06 | 0.74 | 0.89 | 0.96 | 1.13 |
| P62308 | Developmentally-regulated GTP-binding protein 2                                                                                                                                                                                                                                                                                                            | SNRPG    | 3  | 35.5 | 0     | 24.09 | 0.97 | 1.08 | 0.98 | 1.17 | 1.08 | 1.27 | 1.20 | 0.85 | 1.06 |
| J3QRI9 | Pituitary tumor-transforming gene 1 protein-interacting protein                                                                                                                                                                                                                                                                                            | DRG2     | 3  | 25.6 | 0     | 7.428 | 0.91 | 1.00 | 1.08 | NaN  | 1.12 | 0.82 | NaN  | NaN  | 1.00 |
| A8MZH8 | Eukaryotic translation initiation factor 3 subunit L                                                                                                                                                                                                                                                                                                       | PTTG1IP  | 2  | 23.4 | 0     | 3.994 | 1.14 | 1.53 | 1.30 | 1.10 | 1.53 | 1.35 | NaN  | 1.00 | 1.38 |
| B0QY89 | RNA-binding protein EWS                                                                                                                                                                                                                                                                                                                                    | EIF3L    | 15 | 31.3 | 0     | 184.3 | 1.09 | 1.13 | 0.98 | 1.06 | 1.03 | 0.96 | NaN  | 0.78 | 0.96 |
| B0QYK0 | SUMO-conjugating enzyme                                                                                                                                                                                                                                                                                                                                    | EWSR1    | 6  | 14.6 | 0     | 44.06 | 0.94 | 0.98 | 1.01 | 1.07 | 1.03 | 1.00 | 0.73 | 0.99 | 0.93 |
| H3BQQ9 | mRNA export factor                                                                                                                                                                                                                                                                                                                                         | UBE2I    | 5  | 51.1 | 0     | 11.52 | 0.73 | 0.74 | NaN  | NaN  | 0.85 | 0.71 | 0.79 | NaN  | 0.50 |
| B0QZ36 | Coatomer subunit delta                                                                                                                                                                                                                                                                                                                                     | RAE1     | 3  | 38.7 | 0     | 7.664 | 1.18 | 1.20 | NaN  | NaN  | NaN  | 1.41 | NaN  | NaN  | 1.49 |
| B0YIW6 | DNA helicase;DNA replication licensing factor MCM5                                                                                                                                                                                                                                                                                                         | ARCN1    | 21 | 43.7 | 0     | 114.8 | 0.89 | 0.93 | 1.00 | 0.96 | 1.02 | 0.90 | 1.04 | 1.03 | 0.86 |
| B1AHB1 |                                                                                                                                                                                                                                                                                                                                                            | MCM5     | 9  | 16.6 | 0     | 6.905 | 0.62 | 0.72 | 0.67 | 1.01 | 0.85 | 0.86 | NaN  | 0.83 | 0.77 |

|        |                                                                                                                                                  |         |    |      |       |       |      |      |      |      |      |      |      |      |      |
|--------|--------------------------------------------------------------------------------------------------------------------------------------------------|---------|----|------|-------|-------|------|------|------|------|------|------|------|------|------|
| B1AJY7 | 26S proteasome non-ATPase regulatory subunit 10                                                                                                  | PSMD10  | 4  | 32.6 | 0     | 170.7 | NaN  | NaN  | NaN  | NaN  | 1.09 | NaN  | NaN  | 1.15 | 3.07 |
| B1AK87 |                                                                                                                                                  | CAPZB   | 3  | 56.5 | 0     | 158.2 | 1.07 | 1.09 | 1.03 | 0.99 | 0.92 | 1.04 | 1.10 | 0.85 | 1.00 |
| B1AKD8 | Rootletin                                                                                                                                        | CROCC   | 1  | 0.6  | 0.009 | 1.407 | 1.03 | 0.97 | 1.02 | 0.99 | 0.96 | 1.02 | 0.93 | 0.06 | 0.95 |
| B1AKJ5 | Nardilysin                                                                                                                                       | NRD1    | 3  | 3.3  | 0     | 3.554 | NaN  | 0.54 | 0.47 | NaN  | 0.55 | NaN  | NaN  | NaN  | NaN  |
| B3KT28 | FAS-associated factor 1<br>Polyadenylate-binding                                                                                                 | FAF1    | 1  | 1.9  | 0.004 | 1.774 | 0.63 | 1.30 | NaN  | NaN  | NaN  | NaN  | NaN  | NaN  | NaN  |
| B1ANR0 | protein;Polyadenylate-binding protein 4                                                                                                          | PABPC4  | 6  | 28.9 | 0     | 8.143 | NaN  | 1.08 | 0.56 | 0.86 | NaN  | 1.95 | NaN  | 0.81 | 2.04 |
| H3BLV0 | Complement decay-accelerating factor                                                                                                             | CD55    | 9  | 31.9 | 0     | 30.26 | NaN  | 1.21 | 1.10 | 0.99 | 1.11 | 1.24 | 0.90 | 0.98 | 1.00 |
| B4DG22 | Ribosomal protein S6 kinase alpha-3;Ribosomal protein S6 kinase alpha-2;Ribosomal protein S6 kinase alpha-1                                      | RPS6KA3 | 3  | 5.5  | 0.001 | 2.448 | 1.62 | 1.03 | 0.83 | NaN  | NaN  | 0.92 | NaN  | NaN  | 1.54 |
| G3V4W0 | Heterogeneous nuclear ribonucleoproteins C1/C2;Heterogeneous nuclear ribonucleoprotein C-like 1;Heterogeneous nuclear ribonucleoprotein C-like 2 | HNRNPC  | 22 | 55   | 0     | 323.3 | 0.80 | 0.82 | 0.79 | 0.75 | 0.83 | 0.82 | 0.89 | 0.94 | 0.89 |
| B3KS98 | Eukaryotic translation initiation factor 3 subunit H                                                                                             | EIF3H   | 6  | 34.4 | 0     | 323.3 | 1.20 | 1.10 | 1.09 | 1.12 | 1.19 | 0.92 | 0.91 | 1.14 | 0.66 |
| M0QZP4 | Branched-chain-amino-acid aminotransferase;Branched-chain-amino-acid aminotransferase, mitochondrial                                             | BCAT2   | 4  | 17.9 | 0     | 17.89 | 1.28 | 0.86 | 1.12 | 0.90 | 1.00 | 0.89 | 1.19 | 1.02 | 1.27 |
| B4DDD8 | Histidine--tRNA ligase,                                                                                                                          | HARS    | 12 | 33.8 | 0     | 30.35 | 0.79 | 0.68 | 0.63 | NaN  | 0.74 | 0.68 | NaN  | NaN  | 0.76 |
| B4DDF4 | Calponin;Calponin-2                                                                                                                              | CNN2    | 12 | 55.4 | 0     | 323.3 | 1.16 | 1.03 | 1.16 | 1.07 | 1.14 | 1.08 | 1.14 | 1.01 | 1.12 |
| U3KQP3 | NADH dehydrogenase [ubiquinone] 1 alpha subcomplex subunit 13                                                                                    | NDUFA13 | 1  | 18.7 | 0.008 | 1.546 | 0.56 | 0.56 | 0.66 | NaN  | 0.57 | 0.56 | 0.82 | 1.06 | 0.64 |
| H0YKU5 | COP9 signalosome complex subunit 2                                                                                                               | COPS2   | 3  | 12.5 | 0     | 3.914 | NaN  | NaN  | NaN  | NaN  | 1.78 | 0.68 | NaN  | 1.25 | 0.88 |
| B4DJ81 | NADH-ubiquinone oxidoreductase 75 kDa subunit,                                                                                                   | NDUFS1  | 9  | 24.5 | 0     | 13.34 | 1.12 | 0.83 | 0.72 | NaN  | 0.63 | NaN  | NaN  | NaN  | NaN  |
| B4DJV2 | Citrate synthase;Citrate synthase, mitochondrial                                                                                                 | CS      | 11 | 41.1 | 0     | 306.5 | 1.14 | 1.06 | 1.14 | 0.97 | 1.10 | 1.05 | 0.95 | 0.95 | 0.99 |
| B4DKY1 | Cysteine--tRNA ligase, cytoplasmic                                                                                                               | CARS    | 6  | 10.1 | 0     | 6.645 | 0.69 | 0.69 | 1.00 | NaN  | NaN  | NaN  | NaN  | NaN  | NaN  |
| B4DLN1 | 39S ribosomal protein L12, mitochondrial                                                                                                         | MRPL12  | 7  | 22.2 | 0     | 56.66 | 0.80 | 0.90 | 0.84 | 1.08 | 1.16 | 0.84 | 1.04 | 0.95 | 0.97 |
| B4DR61 | Protein transport protein Sec61 subunit alpha isoform 1                                                                                          | SEC61A1 | 5  | 10.4 | 0     | 7.812 | NaN  | 0.67 | NaN  | 1.20 | 0.85 | 1.21 | 0.89 | 0.58 | NaN  |



|        |                                                                                                                                        |         |    |      |       |       |      |      |      |      |      |      |      |      |      |
|--------|----------------------------------------------------------------------------------------------------------------------------------------|---------|----|------|-------|-------|------|------|------|------|------|------|------|------|------|
| H0Y630 | Serine/threonine-protein kinase 24;Serine/threonine-protein kinase 24 36 kDa subunit;Serine/threonine-protein kinase 24 12 kDa subunit | STK24   | 5  | 22   | 0     | 7.651 | 1.00 | 1.06 | 0.87 | 0.91 | 0.82 | 0.79 | 0.76 | 0.68 | 1.13 |
| B4DY09 | Interleukin enhancer-binding factor 2                                                                                                  | ILF2    | 17 | 66.8 | 0     | 121.4 | 0.95 | 0.90 | 0.96 | 0.90 | 0.89 | 0.96 | 1.00 | 1.00 | 0.94 |
| B4E0K5 | Mitogen-activated protein kinase 14                                                                                                    | MAPK14  | 4  | 15.5 | 0     | 5.133 | 0.94 | NaN  | 0.73 | NaN  | NaN  | 0.99 | 0.69 | NaN  | 1.14 |
| B5MBZ0 | Echinoderm microtubule-associated protein-like 4                                                                                       | EML4    | 2  | 2.8  | 1E-03 | 2.285 | NaN  | NaN  | NaN  | 0.60 | NaN  | NaN  | 0.97 | 0.60 | NaN  |
| B5MBZ8 | Protein phosphatase 1 regulatory subunit 7                                                                                             | PPP1R7  | 3  | 17.9 | 0     | 19.14 | NaN  | NaN  | NaN  | NaN  | NaN  | NaN  | 1.37 | NaN  | 0.78 |
| B5MC59 | Replication protein A 14 kDa subunit                                                                                                   | RPA3    | 3  | 52.4 | 0     | 5.935 | 1.17 | 1.26 | 1.30 | 1.65 | NaN  | 1.59 | NaN  | 0.51 | 1.07 |
| B5MDF5 | GTP-binding nuclear protein Ran                                                                                                        | RAN     | 10 | 41.2 | 0     | 151.3 | 1.03 | 0.93 | 0.94 | 0.93 | 0.94 | 0.92 | 0.92 | 0.97 | 0.90 |
| E7EW69 | Septin-10                                                                                                                              | SEPT10  | 5  | 24.4 | 0     | 70.93 | NaN  | 1.29 | 0.93 | 1.10 | 0.94 | 1.21 | 0.80 | 0.77 | 1.49 |
| B7Z4M1 | Reticulon                                                                                                                              | RTN3    | 1  | 12.2 | 0     | 67.28 | 0.98 | 1.29 | 1.02 | NaN  | 1.26 | 1.15 | NaN  | NaN  | 1.36 |
| B7Z7F3 | Ran-binding protein 3                                                                                                                  | RANBP3  | 3  | 9.9  | 0     | 2.945 | 1.15 | 1.26 | NaN  | NaN  | NaN  | 0.88 | NaN  | NaN  | NaN  |
| B7Z7P8 | Eukaryotic peptide chain release factor subunit 1                                                                                      | ETF1    | 9  | 25.8 | 0     | 16.54 | 1.26 | 0.83 | 1.11 | 0.92 | 1.18 | 0.94 | 0.99 | 0.99 | 0.92 |
| B7ZC38 | Endophilin-B2                                                                                                                          | SH3GLB2 | 6  | 22.8 | 0     | 20.72 | 1.01 | NaN  | 0.99 | 0.97 | 1.09 | 1.08 | 1.14 | 1.01 | NaN  |
| B8ZZN6 | Small ubiquitin-related modifier 1                                                                                                     | SUMO1   | 3  | 25.3 | 0     | 7.793 | 0.60 | NaN  | 0.67 | 0.60 | NaN  | 0.65 | 0.74 | 0.88 | 0.81 |
| B8ZZQ6 | Prothymosin alpha;Prothymosin alpha, N-terminally processed;Thymosin alpha-1                                                           | PTMA    | 7  | 37.4 | 0     | 323.3 | 0.97 | 1.06 | 1.01 | 0.97 | 0.99 | 0.91 | 1.00 | 1.06 | 0.98 |
| B8ZZU8 | Transcription elongation factor B polypeptide 2                                                                                        | TCEB2   | 5  | 79.6 | 0     | 51.56 | 1.08 | 0.83 | 1.12 | 1.01 | 1.13 | 1.06 | 0.86 | 0.97 | 1.01 |
| C9J0K6 | Sorcin                                                                                                                                 | SRI     | 7  | 55.5 | 0     | 43.71 | 1.01 | 1.15 | 1.03 | 1.17 | 1.24 | 1.40 | NaN  | 1.08 | 1.10 |
| D6RBD7 | Eukaryotic translation elongation factor 1 epsilon-1                                                                                   | EEF1E1  | 3  | 30.7 | 0     | 41.23 | NaN  | 1.08 | 0.93 | NaN  | NaN  | 0.88 | NaN  | 0.54 | 0.84 |
| C9J1Z8 | ADP-ribosylation factor 5                                                                                                              | ARF5    | 3  | 67.3 | 0     | 4.913 | 0.81 | 0.89 | 0.87 | 0.62 | 0.79 | 0.80 | 0.93 | 0.99 | 1.17 |
| C9J4Z3 | 60S ribosomal protein L37a                                                                                                             | RPL37A  | 4  | 69.1 | 0     | 18.85 | 0.82 | 0.73 | 0.73 | 0.80 | 0.92 | 0.78 | 0.91 | 0.63 | 0.83 |
| C9JA28 | Translocon-associated protein subunit gamma                                                                                            | SSR3    | 1  | 8    | 0     | 29.45 | NaN  | NaN  | 1.16 | 0.69 | NaN  | 0.98 | NaN  | 0.76 | 1.19 |
| C9JAF7 | Synaptosomal-associated protein 29                                                                                                     | SNAP29  | 2  | 15   | 0     | 2.948 | NaN  | NaN  | NaN  | 0.88 | 0.70 | NaN  | NaN  | NaN  | NaN  |
| C9JBI3 | Phosphoserine phosphatase                                                                                                              | PSPH    | 2  | 12.3 | 1E-03 | 2.167 | 1.32 | 1.31 | 1.33 | 1.65 | 1.52 | 1.46 | 0.78 | 0.96 | 0.91 |
| E9PNC7 | Dr1-associated corepressor                                                                                                             | DRAP1   | 2  | 14.8 | 0.001 | 2.632 | 0.97 | 0.98 | 1.12 | NaN  | 1.13 | 0.89 | NaN  | NaN  | 1.00 |
| C9JCD9 | Protein BUD31 homolog                                                                                                                  | BUD31   | 2  | 29.1 | 0.008 | 1.526 | 1.01 | 1.30 | 0.89 | 1.15 | 1.61 | 1.05 | 0.92 | 0.98 | 1.21 |
| C9JFE4 | COP9 signalosome complex subunit 1                                                                                                     | GPS1    | 6  | 18   | 0     | 25.62 | 0.73 | 1.11 | 0.89 | 0.90 | 0.70 | 0.75 | 1.12 | NaN  | 0.95 |
| C9JFM5 | Syntaxin-4                                                                                                                             | STX4    | 2  | 17.1 | 0     | 14.69 | 1.21 | 1.17 | NaN  | NaN  | 1.22 | 1.64 | NaN  | NaN  | 0.99 |
| C9JFR7 | Cytochrome c                                                                                                                           | CYCS    | 6  | 57.4 | 0     | 39.05 | 1.01 | 1.05 | 0.92 | 0.95 | 1.21 | 1.11 | 0.81 | 0.59 | 0.69 |
| C9JG08 |                                                                                                                                        |         | 2  | 0.6  | 0.008 | 1.485 | 1.29 | 1.02 | 1.14 | NaN  | 1.31 | 1.21 | NaN  | NaN  | NaN  |

|        |                                                                          |           |    |      |       |       |      |      |      |      |      |      |      |      |      |
|--------|--------------------------------------------------------------------------|-----------|----|------|-------|-------|------|------|------|------|------|------|------|------|------|
| C9JJT5 | ATP synthase subunit f, mitochondrial                                    | ATP5J2-P1 | 2  | 44.4 | 0     | 4.72  | 0.98 | NaN  | 1.08 | 1.07 | 1.01 | 1.04 | NaN  | 0.89 | 0.93 |
| C9JXB8 | 60S ribosomal protein L24                                                | RPL24     | 6  | 44.6 | 0     | 35.58 | 0.83 | 0.91 | 0.85 | 1.06 | 0.96 | 0.99 | 0.86 | 1.04 | 0.78 |
| C9JRR5 | Protein PTHB1                                                            | BBS9      | 1  | 15.8 | 1E-03 | 2.311 | 0.76 | 0.76 | 0.77 | 0.95 | 0.95 | 0.93 | 0.66 | 0.63 | 0.63 |
| C9JRZ6 | MICOS complex subunit MIC19                                              | CHCHD3    | 9  | 28.9 | 0     | 34.38 | 1.01 | 1.08 | 1.13 | 1.03 | 1.11 | 0.98 | 0.94 | 0.91 | 0.89 |
| C9JSF2 | Heat shock factor 2-binding protein                                      | HSF2BP    | 1  | 4.4  | 0.002 | 1.993 | 1.29 | 1.29 | 1.15 | 1.20 | 1.10 | 1.17 | 1.45 | 1.26 | 1.35 |
| C9K055 | Prenylcysteine oxidase 1<br>Ras-associated and pleckstrin                | PCYOX1    | 3  | 15.3 | 0     | 3.014 | 0.79 | 0.97 | 0.95 | 0.74 | 0.86 | 1.18 | 0.64 | 0.55 | 0.77 |
| C9K0J5 | homology domains-containing protein 1                                    | RAPH1     | 4  | 4.8  | 0     | 6.37  | NaN  | 1.72 | 1.46 | 0.70 | 0.61 | NaN  | 0.98 | NaN  | 0.87 |
| F6U1T9 | Calcineurin subunit B type 1                                             | PPP3R1    | 5  | 55.6 | 0     | 42.48 | 0.89 | 0.96 | 1.20 | 0.96 | 0.73 | 0.97 | 0.97 | NaN  | 0.77 |
| D3YTB1 | 60S ribosomal protein L32                                                | RPL32     | 7  | 45.1 | 0     | 55.43 | 0.75 | 0.77 | 0.89 | 1.00 | 0.90 | 0.85 | 1.08 | 1.04 | 0.91 |
| D6R967 | Inorganic pyrophosphatase 2, mitochondrial                               | PPA2      | 4  | 28.3 | 0     | 10.14 | 0.76 | 0.59 | NaN  | 1.32 | 1.18 | 1.02 | NaN  | NaN  | 1.15 |
| D6R9P3 | Heterogeneous nuclear ribonucleoprotein A/B                              | HNRNPAB   | 8  | 31.8 | 0     | 236.2 | 0.89 | 0.89 | 0.84 | 1.28 | 0.94 | 1.01 | 1.32 | 0.88 | 0.84 |
| D6RBQ9 | NADH dehydrogenase                                                       | HNRNPD    | 1  | 40   | 0     | 35.16 | 0.96 | 0.81 | 0.79 | 0.97 | 0.91 | 1.16 | 0.93 | 0.84 | 0.94 |
| D6RBT3 | [ubiquinone] iron-sulfur protein 6, mitochondrial                        | NDUFS6    | 1  | 8.7  | 0.004 | 1.782 | 1.32 | NaN  | 0.91 | NaN  | NaN  | 1.84 | NaN  | NaN  | 1.35 |
| D6RBV2 | Vesicular integral-membrane protein VIP36                                | LMAN2     | 5  | 26.2 | 0     | 5.502 | NaN  | 1.08 | 0.96 | NaN  | 1.12 | 1.04 | 1.00 | 1.24 | 1.14 |
| D6REM1 | Golgi phosphoprotein 3                                                   | GOLPH3    | 1  | 17.2 | 0     | 203.9 | 0.87 | 1.05 | 0.74 | 0.91 | NaN  | NaN  | NaN  | 0.89 | 1.02 |
| D6RGI3 | Septin-11                                                                | SEPT11    | 10 | 35.5 | 0     | 139.3 | 1.03 | 1.32 | 1.06 | 1.05 | 1.14 | 0.94 | 1.24 | 1.01 | 1.35 |
| D6REX3 | Protein transport protein Sec31A                                         | SEC31A    | 8  | 8    | 0     | 15.66 | 0.80 | 0.79 | NaN  | NaN  | 0.56 | 0.48 | 0.57 | 0.94 | 0.91 |
| D6RF11 | Drebrin                                                                  | DBN1      | 3  | 33.1 | 0     | 3.437 | 1.03 | 1.13 | 0.99 | 0.72 | NaN  | NaN  | NaN  | 0.81 | NaN  |
| D6RFM5 | Succinate dehydrogenase [ubiquinone] flavoprotein subunit, mitochondrial | SDHA      | 10 | 27.6 | 0     | 122.6 | 0.79 | 1.00 | 0.89 | 0.68 | 0.84 | 0.84 | 0.83 | 0.76 | 1.05 |
| D6RG15 | Twinfilin-2                                                              | TWF2      | 3  | 24   | 0     | 4.087 | NaN  | NaN  | 0.91 | NaN  | NaN  | NaN  | 1.12 | 0.86 | 1.67 |
| E5RFP0 | NudC domain-containing protein                                           | NUDCD2    | 1  | 8.3  | 5E-04 | 2.834 | NaN  | 1.32 | NaN  | 1.23 | 1.36 | 1.17 | NaN  | NaN  | NaN  |
| E5RGN3 | Copper transport protein ATOX1                                           | ATOX1     | 4  | 45.8 | 0     | 33.52 | 1.14 | 0.77 | 1.18 | NaN  | 0.92 | 0.88 | 1.70 | NaN  | 0.93 |
| E5RGS4 | Prefoldin subunit 1                                                      | PFDN1     | 3  | 23.9 | 0     | 3.332 | NaN  | 0.29 | NaN  | NaN  | 0.93 | 0.84 | 1.49 | 1.63 | NaN  |
| E5RGX5 | Stathmin;Stathmin-2                                                      | STMN2     | 1  | 16.7 | 0     | 70.07 | 0.83 | 0.87 | 0.85 | 0.86 | 0.91 | 0.86 | 0.94 | 0.90 | 0.97 |
| E5RHG8 | Transcription elongation factor B polypeptide 1                          | TCEB1     | 4  | 62.9 | 0     | 126.9 | 0.98 | 1.08 | 1.15 | 0.95 | 1.04 | 0.95 | 0.97 | NaN  | 0.91 |
| E5RHT6 | ADP-ribosylation factor GTPase-activating protein 1                      | ARFGAP1   | 3  | 19.7 | 0     | 4.239 | 1.07 | 0.85 | NaN  | NaN  | NaN  | NaN  | NaN  | NaN  | NaN  |
| E5RIW3 | Tubulin-specific chaperone A                                             | TBCA      | 10 | 76.2 | 0     | 88.15 | 1.03 | 1.11 | 1.23 | 0.91 | 0.98 | 1.01 | 0.73 | 0.61 | 0.94 |
| E5RJR5 | S-phase kinase-associated protein 1                                      | SKP1      | 5  | 38.7 | 0     | 73.37 | 1.20 | 1.37 | 1.47 | 0.96 | 1.12 | 1.08 | 0.99 | 0.77 | 2.10 |
| E7EM64 | COP9 signalosome complex subunit 6                                       | COPS6     | 3  | 13.8 | 0     | 3.158 | NaN  | NaN  | NaN  | NaN  | 1.00 | 1.84 | NaN  | NaN  | 0.90 |
| J3QLD9 | Flotillin-2                                                              | FLOT2     | 10 | 29.7 | 0     | 27.28 | 0.66 | 0.70 | 0.71 | 0.73 | 0.77 | 0.98 | 0.81 | 0.73 | 0.73 |
| J3KMY5 | Epididymal secretory protein E1                                          | NPC2      | 5  | 43.9 | 0     | 80.67 | 1.36 | 1.37 | 1.38 | 1.06 | 1.05 | 1.06 | 1.38 | 1.40 | 1.51 |
| K7EJL1 | AP-1 complex subunit mu-1                                                | AP1M1     | 5  | 19.1 | 0     | 3.592 | 0.83 | 0.69 | 0.76 | NaN  | NaN  | 0.77 | NaN  | NaN  | 0.57 |

|        |                                                                                                                                 |         |    |      |       |       |      |      |      |      |      |      |      |      |      |
|--------|---------------------------------------------------------------------------------------------------------------------------------|---------|----|------|-------|-------|------|------|------|------|------|------|------|------|------|
| I3L4G9 | Phosphoribosyl pyrophosphate synthase-associated protein 2                                                                      | PRPSAP2 | 1  | 21.7 | 0.008 | 1.493 | 0.83 | 0.83 | NaN  | NaN  | NaN  | NaN  | NaN  | NaN  | 0.68 |
| E7ES33 | Septin-7                                                                                                                        | SEPT7   | 15 | 43.6 | 0     | 168.6 | 1.07 | 1.12 | 1.08 | 1.00 | 0.97 | 0.95 | 1.06 | 0.95 | 0.97 |
| E7EPN9 | Protein PRRC2C<br>NADH dehydrogenase                                                                                            | PRRC2C  | 5  | 3.2  | 0     | 16.21 | 1.23 | NaN  | 1.35 | 1.00 | 1.10 | 1.00 | NaN  | 0.99 | 1.30 |
| E7EPT4 | [ubiquinone] flavoprotein 2, mitochondrial                                                                                      | NDUFV2  | 2  | 9.1  | 1E-03 | 2.259 | NaN  | 1.25 | 1.09 | NaN  | NaN  | 0.98 | NaN  | NaN  | NaN  |
| E7EQ69 | N-alpha-acetyltransferase 50                                                                                                    | NAA50   | 3  | 20.2 | 0     | 3.046 | 1.14 | 1.29 | 1.11 | 0.81 | NaN  | NaN  | 0.77 | 1.16 | 1.04 |
| E7EQR4 | Ezrin                                                                                                                           | EZR     | 31 | 64   | 0     | 323.3 | 0.90 | 0.88 | 0.87 | 0.92 | 0.97 | 0.93 | 0.81 | 0.96 | 0.83 |
| S4R3H4 | Apoptotic chromatin condensation inducer in the Protein FAM136A                                                                 | ACIN1   | 9  | 10.1 | 0     | 28.77 | 1.20 | 0.96 | 1.02 | 1.12 | 0.65 | 0.70 | 1.78 | 1.01 | 1.33 |
| E7EQY1 | Cyclin-dependent kinase 2;Cyclin-dependent kinase 3                                                                             | FAM136A | 4  | 19.6 | 0     | 132.3 | NaN  | 0.64 | NaN  | NaN  | 1.31 | 1.16 | NaN  | NaN  | NaN  |
| E7ESI2 | Procollagen-lysine,2-oxoglutarate 5-dioxygenase 2                                                                               | CDK2    | 2  | 20.6 | 0     | 4.727 | NaN  | NaN  | NaN  | 0.91 | 0.69 | NaN  | NaN  | NaN  | NaN  |
| E7ETU9 | Basic leucine zipper and W2 domain-containing protein 2                                                                         | PLOD2   | 16 | 30.3 | 0     | 82.36 | 1.63 | 1.50 | 1.37 | 1.19 | 1.60 | 1.32 | 2.03 | 1.54 | 1.02 |
| E7ETZ4 | Eukaryotic translation initiation factor 4 gamma 1                                                                              | BZW2    | 2  | 10   | 0     | 63.02 | NaN  | 0.97 | 1.20 | 0.92 | 0.97 | 0.85 | 0.93 | 0.90 | 0.87 |
| E7EUU4 | Kinesin light chain 1                                                                                                           | EIF4G1  | 30 | 29.4 | 0     | 323.3 | 1.04 | 1.04 | 0.99 | 1.04 | 0.87 | 1.03 | 0.89 | 0.97 | 0.90 |
| G5E9S8 | Dihydropyrimidinase-related protein 5                                                                                           | KLC1    | 6  | 17.1 | 0     | 6.55  | NaN  | 0.57 | 0.94 | NaN  | NaN  | 0.70 | 0.75 | 0.72 | NaN  |
| E7EWB4 | Cleavage stimulation factor subunit 2;Cleavage stimulation factor subunit 2 tau variant                                         | DPYSL5  | 1  | 3.7  | 0.007 | 1.655 | NaN  | 0.97 | 0.96 | 0.63 | NaN  | 0.71 | 0.91 | 0.87 | 0.94 |
| E7EWR4 | Eukaryotic translation initiation factor 4B                                                                                     | CSTF2   | 6  | 14.4 | 0     | 5.016 | 0.67 | 1.24 | 1.02 | NaN  | NaN  | 1.21 | NaN  | NaN  | 0.64 |
| E7EX17 | Dynactin subunit 1                                                                                                              | EIF4B   | 16 | 31.5 | 0     | 323.3 | 1.24 | 1.22 | 1.24 | 0.98 | 1.08 | 1.18 | 1.04 | 0.98 | 1.06 |
| E7EX90 | NIF3-like protein 1                                                                                                             | DCTN1   | 18 | 19.8 | 0     | 76.36 | 0.83 | 0.73 | 1.17 | 0.98 | 0.71 | 0.87 | 0.94 | 0.98 | 0.77 |
| E7EXA3 | Nascent polypeptide-associated complex subunit alpha;Nascent polypeptide-associated complex subunit alpha, muscle-specific form | NIF3L1  | 1  | 5.3  | 1E-03 | 2.115 | NaN  | NaN  | NaN  | 1.17 | NaN  | 0.76 | NaN  | NaN  | 0.60 |
| F8VZJ2 | Sulfatase-modifying factor 2                                                                                                    | NACA    | 5  | 45.6 | 0     | 122.3 | 1.22 | 1.16 | 1.21 | 1.05 | 0.96 | 1.07 | 1.04 | 1.11 | 1.12 |
| E9PBT8 | Histone-binding protein RBBP7                                                                                                   | SUMF2   | 3  | 17.2 | 0     | 16.87 | 0.94 | 1.05 | 0.97 | NaN  | 1.73 | NaN  | 1.15 | NaN  | 0.60 |
| E9PC52 | 2-oxoglutarate dehydrogenase, mitochondrial                                                                                     | RBBP7   | 6  | 35.8 | 0     | 54.82 | 0.67 | 0.64 | 0.90 | 0.77 | 0.80 | 0.86 | 0.91 | 0.87 | 0.99 |
| E9PCR7 | Heterogeneous nuclear ribonucleoprotein                                                                                         | OGDH    | 8  | 17.3 | 0     | 21.72 | NaN  | 1.00 | 0.81 | 1.01 | 0.57 | 0.92 | 0.65 | 0.83 | 1.15 |
| E9PCY7 | H;Heterogeneous nuclear ribonucleoprotein H, N-terminally processed                                                             | HNRNPH1 | 8  | 47.8 | 0     | 323.3 | 0.88 | 0.88 | 0.91 | 0.85 | 0.85 | 0.87 | 0.97 | 0.99 | 0.96 |

|        |                                                                      |         |    |      |       |       |      |      |      |      |      |      |      |      |      |
|--------|----------------------------------------------------------------------|---------|----|------|-------|-------|------|------|------|------|------|------|------|------|------|
| E9PD53 | Structural maintenance of chromosomes protein 4                      | SMC4    | 8  | 7.4  | 0     | 14.87 | NaN  | 0.83 | 0.76 | 0.73 | NaN  | 0.80 | NaN  | 0.89 | NaN  |
| E9PDF6 | Unconventional myosin-Ib                                             | MYO1B   | 5  | 7.1  | 0     | 6.527 | NaN  | 0.71 | 0.94 | NaN  | 1.06 | 0.83 | 0.96 | NaN  | 0.88 |
| E9PEB5 | Far upstream element-binding protein 1                               | FUBP1   | 11 | 22.7 | 0     | 50.74 | 1.01 | 0.88 | 0.95 | 0.98 | 1.04 | 0.93 | 0.88 | 0.84 | 1.16 |
| E9PF10 | Nuclear pore complex protein Nup155                                  | NUP155  | 4  | 3.8  | 0     | 5.073 | 0.59 | NaN  | 0.65 | 0.84 | NaN  | 1.12 | 1.05 | 1.13 | 0.81 |
| E9PF63 | Rho-associated protein kinase 2                                      | ROCK2   | 4  | 5.5  | 0     | 13.93 | 1.55 | 2.01 | 1.55 | NaN  | NaN  | 0.50 | 0.85 | 0.62 | 1.09 |
| E9PFH4 | Transportin-3                                                        | TNPO3   | 3  | 5.3  | 0     | 13.85 | 1.22 | 1.34 | NaN  | NaN  | 0.96 | NaN  | NaN  | NaN  | NaN  |
| E9PFP8 | Poly(rC)-binding protein 3                                           | PCBP3   | 0  | 20.2 | 0     | 20.36 | NaN  | 1.40 | NaN  | 1.18 | 1.13 | NaN  | NaN  | NaN  | 0.88 |
| E9PFR3 | Serine/threonine-protein phosphatase 2A 56 kDa                       | PPP2R5D | 10 | 22.7 | 0     | 53.85 | 0.94 | 0.69 | 1.03 | 1.00 | 1.12 | 0.99 | 1.02 | 1.05 | 0.86 |
| E9PGC0 | regulatory subunit delta isoform                                     |         |    |      |       |       |      |      |      |      |      |      |      |      |      |
| E9PGT1 | Ras GTPase-activating protein 1                                      | RASA1   | 4  | 8.2  | 0     | 8.536 | 0.51 | NaN  | NaN  | 0.74 | 0.73 | NaN  | 0.93 | 1.04 | NaN  |
| E9PGZ1 | Translin                                                             | TSN     | 6  | 42.6 | 0     | 19.55 | 0.99 | 0.88 | 0.97 | 0.83 | 0.90 | 0.86 | 0.69 | 0.79 | 0.72 |
| E9PHI4 | Caldesmon                                                            | CALD1   | 19 | 38.1 | 0     | 174.1 | 1.08 | 0.90 | 1.20 | 0.79 | 0.96 | 0.62 | 1.12 | 1.11 | 1.31 |
| E9PHY5 | SUN domain-containing protein 1                                      | SUN1    | 3  | 5.7  | 5E-04 | 2.766 | 1.09 | 0.89 | 1.22 | NaN  | NaN  | NaN  | NaN  | NaN  | 0.83 |
| E9PIQ8 | Band 4.1-like protein 2                                              | EPB41L2 | 13 | 20.2 | 0     | 14.33 | 0.86 | 0.99 | 0.89 | 1.15 | 0.99 | 0.66 | 3.08 | 0.83 | 0.83 |
| E9PK01 | Stromal interaction molecule 1                                       | STIM1   | 2  | 16.5 | 0.001 | 2.726 | NaN  | NaN  | NaN  | 0.93 | 0.98 | NaN  | NaN  | NaN  | NaN  |
| E9PK54 | Elongation factor 1-delta                                            | EEF1D   | 4  | 57.9 | 0     | 323.3 | 1.19 | 1.16 | 1.09 | 1.18 | 1.12 | 1.10 | 0.83 | 0.93 | 1.03 |
| E9PKG1 | Protein arginine N-methyltransferase 1                               | PRMT1   | 13 | 88   | 0     | 6.235 | 1.62 | 1.61 | 1.56 | 1.53 | 1.48 | 1.42 | 1.11 | 1.03 | 1.06 |
| E9PN51 | NADH dehydrogenase [ubiquinone] iron-sulfur protein 8, mitochondrial | NDUFS8  | 1  | 45.8 | 0     | 109.6 | 1.04 | 1.09 | 0.92 | 1.14 | 1.07 | 1.29 | 1.03 | 1.01 | 0.96 |
| E9PKZ0 | [ubiquinone] iron-sulfur protein 8, mitochondrial                    |         |    |      |       |       |      |      |      |      |      |      |      |      |      |
| F8VSA6 | 60S ribosomal protein L8                                             | RPL8    | 6  | 8.2  | 0.001 | 2.11  | 1.09 | 1.13 | 1.00 | 1.12 | NaN  | 1.04 | NaN  | 1.03 | 1.13 |
| E9PL71 | NEDD8                                                                | NEDD8   | 2  | 32.7 | 0     | 176.2 | 0.98 | 0.97 | 0.93 | 0.86 | 0.94 | 0.81 | 1.03 | NaN  | 0.73 |
| E9PLK3 | NEDD8                                                                | EEF1D   | 1  | 46   | 0     | 18.88 | 0.79 | 0.91 | 0.90 | NaN  | 0.83 | 0.92 | NaN  | NaN  | 0.75 |
| E9PLL6 | EEF1D                                                                |         |    |      |       |       |      |      |      |      |      |      |      |      |      |
| I3L3B4 | Puromycin-sensitive aminopeptidase                                   | NPEPPS  | 27 | 54   | 0     | 136.5 | NaN  | NaN  | 1.49 | 1.28 | 1.21 | NaN  | NaN  | 1.31 | 1.40 |
| K4DIA7 | 60S ribosomal protein L27a                                           | RPL27A  | 4  | 36.7 | 0     | 168.3 | 1.08 | 1.09 | 1.12 | 1.11 | 1.08 | 1.14 | 1.03 | 1.00 | 1.04 |
| E9PR30 | Vitamin K epoxide reductase complex subunit 1                        | VKORC1  | 1  | 42.6 | 0     | 18.76 | 0.75 | 1.10 | 0.72 | 0.76 | 1.12 | 0.84 | 1.02 | 1.02 | 0.75 |
| E9PS97 | Tetraspanin;CD151 antigen                                            | CD151   | 4  | 12.5 | 0     | 5.325 | NaN  | NaN  | NaN  | 1.50 | NaN  | NaN  | 2.30 | 1.48 | NaN  |
| F2Z2E2 | 40S ribosomal protein S30                                            | FAU     | 2  | 15.7 | 0     | 9.393 | 0.94 | 1.17 | 1.04 | 1.32 | 1.20 | 1.00 | 1.21 | 1.20 | 1.11 |
| F2Z2Y8 | Alpha-parvin                                                         | PARVA   | 4  | 11.2 | 0     | 3.659 | 1.11 | 1.20 | 1.20 | 1.39 | 1.23 | 1.39 | 1.40 | 1.42 | 1.79 |
| F5GWX2 | Ras GTPase-activating-like protein IQGAP3                            | IQGAP3  | 5  | 27.8 | 0     | 17.42 | 1.08 | 1.39 | 1.15 | NaN  | NaN  | 1.07 | 0.64 | NaN  | 1.30 |
| F5H5V4 | Toll-interacting protein                                             | TOLLIP  | 2  | 6.5  | 1E-03 | 2.284 | NaN  | 1.10 | 0.58 | NaN  | NaN  | NaN  | NaN  | NaN  | NaN  |
| H0YLY7 | Heme-binding protein 1                                               | HEBP1   | 5  | 12.7 | 0     | 5.787 | 0.62 | 0.71 | NaN  | NaN  | NaN  | 0.98 | NaN  | NaN  | NaN  |
|        | 26S proteasome non-ATPase regulatory subunit 9                       | PSMD9   | 5  | 62.4 | 0     | 78.33 | 1.17 | 0.93 | NaN  | 1.19 | 1.06 | 1.18 | 0.85 | 0.67 | 1.01 |
|        | Calcineurin B homologous protein 1                                   | CHP1    | 1  | 39.9 | 0     | 17.75 | NaN  | 0.84 | NaN  | NaN  | 0.84 | NaN  | 0.92 | 0.80 | NaN  |

|        |                                                                                                                                                                                                                      |         |    |      |       |       |      |      |      |      |      |      |      |      |      |
|--------|----------------------------------------------------------------------------------------------------------------------------------------------------------------------------------------------------------------------|---------|----|------|-------|-------|------|------|------|------|------|------|------|------|------|
| F5GX77 | Multifunctional methyltransferase subunit TRM112-like protein                                                                                                                                                        | TRMT112 | 3  | 38.7 | 0     | 3.864 | 0.97 | 1.49 | NaN  | 0.97 | NaN  | 1.48 | NaN  | NaN  | 1.61 |
| F5GXJ9 | CD166 antigen<br>Dolichyl-                                                                                                                                                                                           | ALCAM   | 15 | 45.3 | 0     | 283.8 | 1.06 | 1.01 | 1.00 | 1.33 | 1.19 | 1.15 | 0.90 | 1.02 | 1.23 |
| F5GXX5 | diphosphooligosaccharide--<br>protein glycosyltransferase                                                                                                                                                            | DAD1    | 3  | 37.6 | 0     | 13.26 | NaN  | 1.29 | NaN  | 0.79 | 1.06 | 0.96 | 0.90 | 0.97 | NaN  |
| H0YG54 | Oligoribonuclease, mitochondrial                                                                                                                                                                                     | REXO2   | 8  | 45.7 | 0     | 10.66 | 1.09 | 1.19 | 1.05 | 0.95 | 0.98 | 0.87 | 1.17 | 1.28 | 1.11 |
| F5GZS6 | 4F2 cell-surface antigen heavy<br>chain                                                                                                                                                                              | SLC3A2  | 17 | 34.2 | 0     | 323.3 | 1.12 | 1.07 | 1.10 | 0.94 | 1.06 | 0.99 | 1.13 | 1.10 | 1.12 |
| F5H157 | Ras-related protein Rab-35                                                                                                                                                                                           | RAB35   | 1  | 5.9  | 0     | 208.8 | 1.40 | 1.22 | 1.01 | 0.98 | 1.39 | 1.33 | NaN  | 1.01 | 1.07 |
| F5H2U8 | High mobility group protein<br>HMGI-C                                                                                                                                                                                | HMGA2   | 2  | 36.4 | 0     | 18.51 | NaN  | NaN  | 0.72 | 1.22 | NaN  | NaN  | 0.71 | 1.02 | NaN  |
| F5H365 | Protein transport protein Sec23A                                                                                                                                                                                     | SEC23A  | 7  | 18.9 | 0     | 26.35 | 0.74 | 0.67 | 0.83 | 0.93 | 2.07 | 0.85 | 0.90 | 0.93 | 0.97 |
| F5H442 | Tumor susceptibility gene 101<br>protein                                                                                                                                                                             | TSG101  | 4  | 15.6 | 0     | 6.658 | NaN  | NaN  | 1.00 | 0.86 | NaN  | 1.07 | NaN  | NaN  | NaN  |
| F8VY35 | Nucleosome assembly protein 1-<br>like 1                                                                                                                                                                             | NAP1L1  | 3  | 75.4 | 0     | 323.3 | 1.09 | 1.05 | 1.03 | 1.08 | 1.04 | 1.02 | 1.13 | 1.09 | 1.07 |
| F5H5D3 | Tubulin alpha-1C chain                                                                                                                                                                                               | TUBA1C  | 4  | 69.7 | 0     | 323.3 | 0.53 | 0.56 | 0.53 | 0.56 | 0.58 | 0.59 | 0.96 | 0.89 | 0.94 |
| F5H6E2 | Unconventional myosin-Ic                                                                                                                                                                                             | MYO1C   | 20 | 25.1 | 0     | 85.7  | 0.84 | 0.79 | 0.97 | 0.92 | 1.18 | 1.00 | 1.06 | 0.92 | 1.02 |
| F5H7F6 | Microsomal glutathione S-<br>transferase 1                                                                                                                                                                           | MGST1   | 2  | 18.2 | 0     | 11.02 | NaN  | NaN  | NaN  | NaN  | 0.94 | 0.64 | NaN  | NaN  | NaN  |
| H0Y3C5 | Non-specific protein-tyrosine<br>kinase;Tyrosine-protein kinase<br>Lyn;Tyrosine-protein kinase<br>HCK;Proto-oncogene tyrosine-<br>protein kinase Src;Tyrosine-<br>protein kinase Fyn;Tyrosine-<br>protein kinase Yes | HCK     | 1  | 1.5  | 0     | 5.689 | 0.89 | 0.78 | NaN  | 0.84 | NaN  | 0.66 | NaN  | 0.76 | 0.89 |
| F6TLX2 | Glyoxalase domain-containing<br>protein 4                                                                                                                                                                            | GLOD4   | 11 | 26.5 | 0     | 25.02 | 1.02 | 1.05 | 1.00 | 0.93 | 1.14 | 1.08 | 0.90 | 0.92 | 0.91 |
| F6TR53 | HCLS1-binding protein 3                                                                                                                                                                                              | HS1BP3  | 2  | 11.7 | 0.008 | 1.561 | 1.09 | NaN  | 1.07 | NaN  | NaN  | 0.92 | NaN  | NaN  | NaN  |
| F8VNT9 | Tetraspanin;CD63 antigen<br>CAD protein;Glutamine-<br>dependent carbamoyl-phosphate<br>synthase;Aspartate                                                                                                            | CD63    | 1  | 6    | 0     | 4.749 | 0.83 | 0.96 | 0.93 | 2.00 | 1.62 | 1.18 | 0.98 | 1.19 | 0.95 |
| F8VPD4 | carbamoyltransferase;Dihydrooro<br>fase                                                                                                                                                                              | CAD     | 32 | 20.8 | 0     | 242.8 | 0.79 | 0.76 | 0.76 | 0.74 | 0.74 | 0.77 | 1.02 | 1.02 | 0.96 |
| F8VQE1 | LIM domain and actin-binding<br>protein 1                                                                                                                                                                            | LIMA1   | 14 | 32.1 | 0     | 82.95 | 0.97 | 0.84 | 0.75 | 0.74 | 0.90 | 1.09 | 0.69 | 0.64 | 0.88 |
| F8VVA7 | Coatmer subunit zeta-1                                                                                                                                                                                               | COPZ1   | 6  | 31.3 | 0     | 26.73 | 0.99 | NaN  | 1.08 | 1.08 | 1.32 | 1.11 | 0.86 | NaN  | 1.00 |
| F8VVL1 | Density-regulated protein                                                                                                                                                                                            | DENR    | 5  | 36.2 | 0     | 156.7 | NaN  | NaN  | 0.84 | 1.48 | NaN  | NaN  | 1.33 | 1.25 | 0.89 |
| F8VVM2 |                                                                                                                                                                                                                      | SLC25A3 | 1  | 38.9 | 0     | 231.3 | 0.86 | 0.91 | 1.06 | 1.07 | 1.06 | 1.05 | 0.77 | 1.04 | 0.83 |
| F8VXC8 | SWI/SNF complex subunit<br>SMARCC2;SWI/SNF complex<br>subunit SMARCC1                                                                                                                                                | SMARCC2 | 4  | 4.6  | 0     | 12.4  | 1.06 | 1.52 | 0.99 | 1.30 | 1.00 | NaN  | NaN  | 0.61 | 0.66 |
| F8VXU5 | Vacuolar protein sorting-<br>associated protein 29                                                                                                                                                                   | VPS29   | 3  | 15.9 | 0     | 149   | 1.08 | 1.19 | 0.93 | 1.18 | 0.85 | 1.30 | 1.15 | NaN  | 1.16 |

|        |                                                                                                                                                |          |    |      |       |       |      |      |      |      |      |      |      |      |      |
|--------|------------------------------------------------------------------------------------------------------------------------------------------------|----------|----|------|-------|-------|------|------|------|------|------|------|------|------|------|
| F8VYE8 | Serine/threonine-protein phosphatase;Serine/threonine-protein phosphatase PP1-gamma catalytic subunit                                          | PPP1CC   | 3  | 70.4 | 0     | 45.99 | 1.20 | 1.14 | 1.14 | NaN  | 1.62 | 1.38 | NaN  | NaN  | NaN  |
| F8VZQ9 | SAP domain-containing ribonucleoprotein                                                                                                        | SARNP    | 4  | 17.4 | 0     | 3.912 | 0.92 | 0.91 | 0.91 | NaN  | NaN  | NaN  | NaN  | NaN  | 0.86 |
| F8W031 | Protein canopy homolog 2 Adenylate kinase 2, mitochondrial;Adenylate kinase 2, mitochondrial, N-terminally processed                           | CNPY2    | 3  | 19   | 0     | 10.07 | 1.26 | 1.21 | 1.22 | 1.13 | NaN  | 0.99 | NaN  | 1.03 | 0.84 |
| F8W1A4 | Nuclear receptor-binding protein Heterogeneous nuclear ribonucleoprotein A1;Heterogeneous nuclear ribonucleoprotein A1, N-terminally processed | NRBP1    | 5  | 12.3 | 0     | 18.78 | 0.71 | 0.94 | 0.79 | 1.08 | 0.74 | 1.12 | NaN  | NaN  | NaN  |
| F8W6G1 | Heterogeneous nuclear ribonucleoprotein A1, N-terminally processed                                                                             | HNRNPA1  | 9  | 58.6 | 0     | 323.3 | 0.88 | 0.85 | 0.92 | 0.88 | 0.90 | 0.92 | 0.95 | 0.91 | 0.94 |
| F8W726 | Ubiquitin-associated protein 2-Double-strand break repair protein MRE11A                                                                       | UBAP2L   | 12 | 17.4 | 0     | 230.3 | 1.26 | 1.07 | 1.27 | 0.85 | 1.00 | 1.27 | 1.11 | 0.94 | 1.02 |
| F8W7U8 | Insulin-like growth factor 2 mRNA-binding protein 2                                                                                            | MRE11A   | 4  | 8.1  | 0     | 5.058 | 0.82 | 1.35 | NaN  | 0.98 | NaN  | 0.88 | NaN  | 0.89 | NaN  |
| F8W930 | Actin-related protein 2/3 complex subunit 4                                                                                                    | IGF2BP2  | 9  | 22   | 0     | 63.12 | 1.45 | 1.16 | 1.26 | 0.54 | 0.78 | 0.63 | 0.85 | NaN  | 1.69 |
| F8WCF6 | NADH dehydrogenase [ubiquinone] flavoprotein 1, mitochondrial                                                                                  | ARPC4-TT | 8  | 48.6 | 0     | 13.86 | 0.95 | 0.88 | 1.20 | 0.92 | 1.04 | 0.92 | 1.01 | 0.86 | 1.07 |
| G3V0I5 | Dipeptidyl peptidase 3                                                                                                                         | NDUFV1   | 2  | 8.1  | 0     | 4.215 | 1.04 | NaN  | 0.82 | NaN  | NaN  | NaN  | NaN  | NaN  | 1.81 |
| G3V1D3 | Apoptosis inhibitor 5                                                                                                                          | DPP3     | 13 | 27.6 | 0     | 147.3 | 0.72 | 0.88 | 0.86 | NaN  | 0.76 | 0.89 | NaN  | 1.08 | 0.91 |
| G3V1C3 | Protein lin-7 homolog C                                                                                                                        | API5     | 9  | 24.7 | 0     | 231.8 | 0.93 | 0.93 | 0.99 | 1.26 | 1.28 | 0.80 | 1.33 | 1.46 | 0.91 |
| G3V1D4 | Methionine aminopeptidase 2                                                                                                                    | LIN7C    | 5  | 24.9 | 0     | 3.92  | NaN  | 0.80 | 0.59 | NaN  | NaN  | NaN  | NaN  | NaN  | NaN  |
| G3V1U3 | Acylphosphatase;Acylphosphatase-1                                                                                                              | METAP2   | 7  | 32.9 | 0     | 140.6 | 0.89 | 0.62 | NaN  | NaN  | NaN  | 0.79 | 1.20 | 1.12 | 0.85 |
| G3V2U7 | Glia maturation factor beta                                                                                                                    | ACYP1    | 2  | 17.8 | 0     | 14.98 | NaN  | 1.33 | NaN  | 1.08 | 1.13 | 1.34 | 1.08 | 0.95 | NaN  |
| G3V4P8 | Proteasome subunit alpha type;Proteasome subunit alpha type-6                                                                                  | GMFB     | 5  | 46   | 0     | 168.3 | 1.09 | 1.12 | 1.11 | 0.93 | 0.98 | 1.02 | 1.02 | 0.83 | 1.13 |
| G3V5Z7 | 28S ribosomal protein S27, mitochondrial                                                                                                       | PSMA6    | 12 | 49.6 | 0     | 122.2 | 1.00 | 0.82 | 0.99 | 0.98 | 1.02 | 0.97 | 0.99 | 0.94 | 0.81 |
| G5EA06 | CUGBP Elav-like family member                                                                                                                  | MRPS27   | 2  | 7.3  | 0     | 2.895 | 0.89 | NaN  | 1.15 | NaN  | NaN  | NaN  | NaN  | NaN  | 0.66 |
| G5EA30 | Dynammin-1-like protein                                                                                                                        | CELF1    | 4  | 10.3 | 0.001 | 2.655 | 0.87 | 0.57 | NaN  | NaN  | NaN  | 0.80 | NaN  | NaN  | NaN  |
| G8JLA2 | Centrosomal protein of 170 kDa                                                                                                                 | MYL6     | 1  | 69.7 | 0     | 323.3 | 0.98 | 0.97 | 0.96 | 0.95 | 1.01 | 0.99 | 1.09 | 1.01 | 1.04 |
| G8JLD5 | Zyxin                                                                                                                                          | DNM1L    | 14 | 28.1 | 0     | 88.27 | 1.19 | 0.98 | 1.21 | 0.99 | 1.22 | 1.11 | 0.80 | 0.82 | 1.02 |
| H0Y2V6 |                                                                                                                                                | CEP170   | 5  | 4.5  | 0     | 10.16 | NaN  | NaN  | NaN  | NaN  | NaN  | 0.86 | 0.95 | 1.48 | NaN  |
| H0Y2Y8 |                                                                                                                                                | ZYX      | 11 | 30.6 | 0     | 152.9 | 1.72 | 1.56 | 1.45 | 1.37 | 1.37 | 1.38 | 1.32 | 1.37 | 1.46 |

|        |                                                                                                                        |          |    |      |       |       |      |      |      |      |      |      |      |      |      |
|--------|------------------------------------------------------------------------------------------------------------------------|----------|----|------|-------|-------|------|------|------|------|------|------|------|------|------|
| Q5QPK2 | Dolichol-phosphate<br>mannosyltransferase subunit 1<br>Ubiquitin carboxyl-terminal                                     | DPM1     | 6  | 23.7 | 0     | 10.71 | 1.19 | 0.94 | 1.30 | 1.34 | 0.95 | 0.99 | NaN  | 1.68 | 1.29 |
| H0Y4E0 | hydrolase;Ubiquitin carboxyl-<br>terminal hydrolase isozyme L5                                                         | UCHL5    | 2  | 20.8 | 0     | 8.369 | 0.93 | 0.87 | 1.11 | 0.76 | 0.85 | 1.13 | NaN  | 0.99 | NaN  |
| H0Y5B4 | 60S ribosomal protein L36a;60S<br>ribosomal protein L36a-like                                                          | RPL36A   | 5  | 35.7 | 0     | 17.39 | 0.99 | 1.68 | 1.20 | 1.00 | NaN  | 1.28 | 1.17 | 1.11 | 1.14 |
| P0DP25 |                                                                                                                        | CALM2    | 11 | 60.4 | 0     | 323.3 | 1.01 | 0.97 | 0.98 | 0.99 | 0.96 | 0.94 | 1.01 | 1.02 | 1.01 |
| H0Y8E6 | DNA replication licensing factor<br>MCM2                                                                               | MCM2     | 11 | 18.5 | 0     | 29    | 0.72 | 0.76 | NaN  | 0.98 | 0.91 | 1.00 | 0.66 | 0.89 | 0.61 |
| H0Y8Z9 | Acyl-CoA dehydrogenase family<br>member 9, mitochondrial                                                               | ACAD9    | 2  | 7    | 0.001 | 2.755 | 0.84 | 0.72 | 0.98 | NaN  | NaN  | 0.79 | NaN  | NaN  | 0.90 |
| H0Y987 | Phosphoacetylglucosamine<br>mutase                                                                                     | PGM3     | 15 | 33.6 | 0     | 121   | 0.99 | 0.93 | 0.97 | 1.01 | 1.01 | 0.89 | 1.06 | 1.15 | 1.06 |
| H0YBL1 | Inositol monophosphatase 1                                                                                             | IMPA1    | 4  | 20.8 | 0     | 6.095 | 0.89 | 0.69 | 1.31 | 1.02 | 0.80 | NaN  | NaN  | 1.12 | 0.81 |
| H0YC42 | Tumor protein D52                                                                                                      | TPD52    | 6  | 34.9 | 0     | 36.81 | 1.28 | 1.30 | 1.21 | 1.11 | 1.13 | NaN  | 1.18 | 1.24 | NaN  |
| H0YD13 | CD44 antigen                                                                                                           | CD44     | 8  | 47.6 | 0     | 322.3 | 1.22 | 1.24 | 1.18 | 1.06 | 1.04 | 1.08 | 1.21 | 0.95 | 0.97 |
| H0YDU8 | Serine/threonine-protein<br>phosphatase;Serine/threonine-<br>protein phosphatase 5                                     | PPP5C    | 6  | 14.4 | 0     | 10.67 | 1.26 | NaN  | 2.19 | 0.71 | 0.97 | 0.77 | 0.96 | 0.70 | 1.09 |
| H0YFD6 | Trifunctional enzyme subunit<br>alpha, mitochondrial;Long-chain<br>enoyl-CoA hydratase;Long chain<br>3-hydroxyacyl-CoA | HADHA    | 27 | 50.5 | 0     | 323.3 | 1.04 | 0.76 | 1.04 | 1.07 | 0.95 | 0.85 | 0.87 | 0.87 | 0.91 |
| H0YHA7 | dehydrogenase                                                                                                          |          |    |      |       |       |      |      |      |      |      |      |      |      |      |
| H0YHA7 | 60S ribosomal protein L18                                                                                              | RPL18    | 7  | 46.7 | 0     | 161.9 | 0.98 | 0.99 | 1.05 | 0.84 | 0.92 | 1.02 | 0.91 | 0.96 | 1.05 |
| H0YMV8 | 40S ribosomal protein S27;40S<br>ribosomal protein S27-like                                                            | RPS27L   | 1  | 32   | 1E-03 | 2.141 | NaN  | NaN  | NaN  | 0.67 | NaN  | NaN  | 1.16 | 1.03 | NaN  |
| H0YNW5 | Deoxyuridine 5-triphosphate<br>nucleotidohydrolase,                                                                    | DUT      | 5  | 37.1 | 0     | 26.77 | 1.09 | 1.25 | 1.20 | 0.88 | 0.87 | 1.06 | 0.71 | NaN  | 0.87 |
| H3BLV9 | SRSF protein kinase 1                                                                                                  | SRPK1    | 5  | 12.1 | 0     | 26.41 | 0.88 | 0.94 | 1.10 | 0.66 | 0.79 | 0.94 | NaN  | 0.79 | 0.66 |
| H3BM14 | NEDD8 ultimate buster 1                                                                                                | NUB1     | 2  | 3.7  | 0     | 3.501 | 0.77 | 0.86 | 0.89 | NaN  | 0.47 | NaN  | NaN  | NaN  | 1.67 |
| H3BN50 | Na(+)/H(+) exchange regulatory<br>cofactor NHE-RF2                                                                     | SLC9A3R2 | 4  | 23.3 | 0     | 2.892 | 1.08 | 0.77 | 1.20 | NaN  | 0.66 | NaN  | NaN  | NaN  | 0.75 |
| H3BN98 |                                                                                                                        |          | 2  | 23.6 | 0.002 | 1.984 | 0.89 | 1.35 | 1.04 | 1.17 | 1.07 | NaN  | 0.94 | 0.74 | 1.04 |
| H3BNC9 | 40S ribosomal protein S17                                                                                              | RPS17    | 6  | 14   | 0     | 323.3 | 0.77 | 0.84 | 0.76 | 0.82 | 0.89 | 0.81 | 0.73 | 0.83 | 0.77 |
| H3BPE1 | Microtubule-actin cross-linking<br>factor 1, isoforms 1/2/3/5                                                          | MACF1    | 11 | 2.6  | 0     | 9.739 | 0.77 | NaN  | 0.70 | 0.83 | 1.15 | 0.86 | 1.22 | 1.11 | 1.31 |
| H3BPK3 | Hydroxyacylglutathione<br>hydrolase, mitochondrial                                                                     | HAGH     | 3  | 14.2 | 0.001 | 2.585 | NaN  | 1.23 | 1.06 | NaN  | 1.06 | 0.86 | NaN  | NaN  | 0.93 |
| H3BUU8 |                                                                                                                        | VAC14    | 1  | 14.4 | 0     | 5.888 | 0.66 | 0.66 | 0.67 | NaN  | NaN  | 0.72 | NaN  | NaN  | 1.50 |
| H7BYN3 | Transcription factor A,<br>mitochondrial                                                                               | TFAM     | 2  | 10   | 0.009 | 1.449 | NaN  | NaN  | 1.04 | 0.87 | 0.94 | NaN  | NaN  | NaN  | NaN  |
| H7BYY1 |                                                                                                                        | TPM1     | 7  | 65.3 | 0     | 86.32 | 1.23 | 1.17 | 1.37 | 0.98 | 1.15 | 0.97 | 1.88 | 1.92 | 1.93 |
| H7BZ11 | Nucleobindin-1                                                                                                         | NUCB1    | 4  | 17.3 | 0     | 7.564 | 1.41 | 0.99 | 1.37 | NaN  | NaN  | 0.94 | NaN  | 1.24 | NaN  |
| H7BZJ3 |                                                                                                                        | PDIA3    | 1  | 53.7 | 0     | 127.7 | 1.32 | 1.28 | 1.72 | 1.18 | 1.16 | 1.24 | 1.20 | 1.25 | 1.34 |
| H7C0E5 | Zinc finger protein ZPR1                                                                                               | ZPR1     | 4  | 12.2 | 0     | 6.483 | 1.26 | 0.96 | 1.17 | 1.12 | 1.38 | 0.98 | 1.00 | NaN  | 0.99 |

|        |                                                                                                                                                                                            |          |    |      |       |       |      |      |      |      |      |      |      |      |      |
|--------|--------------------------------------------------------------------------------------------------------------------------------------------------------------------------------------------|----------|----|------|-------|-------|------|------|------|------|------|------|------|------|------|
| H7C2Q8 | Probable rRNA-processing protein EBP2                                                                                                                                                      | EBNA1BP2 | 4  | 15   | 0     | 3.79  | 1.91 | NaN  | NaN  | 1.43 | 0.83 | 1.05 | NaN  | NaN  | 1.43 |
| H7C4H2 | Signal recognition particle receptor subunit beta                                                                                                                                          | SRPRB    | 1  | 8.1  | 0     | 4.804 | 1.24 | 0.87 | 0.93 | NaN  | 1.01 | 1.03 | NaN  | NaN  | 1.17 |
| H7C4T5 | Muscleblind-like protein 1;Muscleblind-like protein 2                                                                                                                                      | MBNL1    | 5  | 20.7 | 0     | 3.455 | NaN  | 0.73 | NaN  | NaN  | 1.24 | 1.62 | NaN  | NaN  | 0.59 |
| H7C5G1 | Isoamyl acetate-hydrolyzing esterase 1 homolog                                                                                                                                             | IAH1     | 2  | 17.1 | 0     | 48.11 | 2.42 | 2.32 | NaN  | 1.80 | NaN  | NaN  | NaN  | 1.40 | 2.20 |
| I1E4Y6 | PERQ amino acid-rich with GYF domain-containing protein 2                                                                                                                                  | GIGYF2   | 3  | 3.6  | 0     | 2.904 | NaN  | NaN  | NaN  | 1.38 | 1.41 | NaN  | NaN  | NaN  | NaN  |
| I3L0H8 | ATP-dependent RNA helicase DDX19A;ATP-dependent RNA helicase DDX19B                                                                                                                        | DDX19A   | 2  | 5.8  | 0     | 7.61  | NaN  | NaN  | NaN  | 0.80 | NaN  | NaN  | 1.50 | 0.85 | NaN  |
| I3L0N3 | Vesicle-fusing ATPase                                                                                                                                                                      | NSF      | 6  | 8.5  | 0     | 5.778 | 0.60 | 0.72 | 0.90 | 0.90 | NaN  | NaN  | NaN  | NaN  | NaN  |
| I3L1P8 | Mitochondrial 2-oxoglutarate/malate carrier                                                                                                                                                | SLC25A11 | 3  | 11.8 | 0     | 153.1 | 0.65 | 1.09 | NaN  | NaN  | 1.55 | NaN  | NaN  | NaN  | 0.81 |
| I3L294 | Monoacylglycerol lipase ABHD12                                                                                                                                                             | ABHD12   | 2  | 19.5 | 0.001 | 2.084 | 0.68 | NaN  | 0.95 | 1.01 | NaN  | 1.16 | NaN  | 1.07 | 1.01 |
| I3L397 | Eukaryotic translation initiation factor 5A;Eukaryotic translation initiation factor 5A-1;Eukaryotic translation initiation factor 5A-1-like;Eukaryotic translation initiation factor 5A-2 | EIF5A    | 14 | 76.7 | 0     | 296.5 | 0.98 | 1.01 | 0.92 | 1.06 | 0.98 | 0.97 | 0.86 | 0.95 | 0.94 |
| J3KMZ9 | Low-density lipoprotein receptor                                                                                                                                                           | LDLR     | 13 | 20.1 | 0     | 108.5 | 1.29 | 1.03 | 0.94 | 1.53 | 1.76 | 1.73 | 0.95 | 1.32 | 0.94 |
| J3KN16 | Proteasome-associated protein ECM29 homolog                                                                                                                                                | KIAA0368 | 6  | 4.3  | 0     | 5.975 | NaN  | NaN  | NaN  | 0.93 | NaN  | 1.19 | 1.04 | 1.20 | 0.72 |
| J3KN66 |                                                                                                                                                                                            | TOR1AIP1 | 1  | 15.9 | 0     | 30.88 | 1.35 | 1.30 | 1.07 | 0.98 | 0.81 | 1.43 | NaN  | 1.35 | 1.36 |
| J3KN67 |                                                                                                                                                                                            | TPM3     | 0  | 62.8 | 0     | 15.42 | 1.03 | 0.95 | 1.00 | NaN  | 1.65 | 0.76 | NaN  | NaN  | 1.13 |
| J3QL05 | Serine/arginine-rich splicing factor 2                                                                                                                                                     | SRSF2    | 5  | 45.4 | 0     | 93.49 | 0.85 | 1.80 | 1.23 | 1.02 | 0.96 | 0.95 | 0.51 | 0.46 | 0.44 |
| J3KPX7 | Prohibitin-2                                                                                                                                                                               | PHB2     | 16 | 58.1 | 0     | 105.3 | 1.00 | 0.91 | 0.94 | 1.03 | 0.95 | 0.95 | 0.78 | 1.21 | 0.77 |
| J3KQ18 | D-dopachrome decarboxylase;D-dopachrome decarboxylase-like protein                                                                                                                         | DDT      | 5  | 40.9 | 0     | 22.72 | 1.10 | 1.10 | 0.99 | 0.90 | 1.14 | 1.04 | NaN  | 0.91 | 0.97 |
| J3KQ32 | Obg-like ATPase 1                                                                                                                                                                          | OLA1     | 16 | 55.8 | 0     | 102.5 | 0.83 | 0.91 | 0.89 | 1.00 | 1.10 | 0.89 | 0.81 | 1.06 | 0.90 |
| J3KQ48 | Peptidyl-tRNA hydrolase 2, mitochondrial                                                                                                                                                   | PTRH2    | 3  | 26.7 | 0     | 8.885 | 1.46 | 1.60 | 0.80 | 0.86 | 0.93 | 1.44 | NaN  | NaN  | 0.86 |
| J3KR44 | Ubiquitin thioesterase OTUB1                                                                                                                                                               | OTUB1    | 11 | 55.1 | 0     | 119.5 | 0.84 | 0.97 | 0.80 | 1.20 | 0.81 | 0.74 | 1.24 | 1.05 | 0.80 |
| J3KR97 | Tubulin-specific chaperone D                                                                                                                                                               | TBCD     | 3  | 4.2  | 0     | 9.811 | NaN  | NaN  | 0.40 | 0.89 | 0.71 | 0.70 | NaN  | NaN  | 0.77 |
| J3QR09 | Ribosomal protein L19;60S ribosomal protein L19                                                                                                                                            | RPL19    | 8  | 31.6 | 0     | 44.42 | 1.05 | 1.05 | 0.99 | 1.07 | 1.10 | 1.09 | 1.16 | 1.02 | 1.10 |
| J3KTI2 | Migration and invasion enhancer                                                                                                                                                            | MIEN1    | 2  | 29.3 | 0     | 5.034 | 0.84 | 0.78 | 0.91 | NaN  | NaN  | 1.18 | NaN  | NaN  | NaN  |
| J3KTL2 | Serine/arginine-rich splicing factor 1                                                                                                                                                     | SRSF1    | 13 | 46.2 | 0     | 107.5 | 1.04 | 0.95 | 1.11 | 0.97 | 0.95 | 0.92 | 1.04 | 1.01 | 1.01 |



|        |                                                                                                                                                |          |    |      |       |       |      |      |      |      |      |      |      |      |      |
|--------|------------------------------------------------------------------------------------------------------------------------------------------------|----------|----|------|-------|-------|------|------|------|------|------|------|------|------|------|
| J3QLE5 | Small nuclear ribonucleoprotein-associated protein N;Small nuclear ribonucleoprotein-associated proteins B and B Myosin regulatory light chain | SNRPN    | 7  | 38.5 | 0     | 15.84 | 0.84 | 0.85 | 0.86 | 0.86 | 0.89 | 0.85 | 1.02 | 0.99 | 0.96 |
| J3QRS3 | 12A;Myosin regulatory light chain 12B                                                                                                          | MYL12A   | 4  | 64.4 | 0     | 323.3 | 0.90 | 0.96 | 0.86 | 0.99 | 1.05 | 0.98 | 0.95 | 0.94 | 0.79 |
| K4DI93 | Cullin-4B                                                                                                                                      | CUL4B    | 6  | 13.7 | 0     | 61.68 | 0.96 | 1.07 | 1.09 | 1.04 | 1.16 | 1.10 | 0.73 | 0.75 | 0.92 |
| K7EM02 | Katanin p60 ATPase-containing subunit A-like 2                                                                                                 | KATNAL2  | 1  | 9.4  | 0     | 4.338 | 0.94 | NaN  | 0.90 | 1.01 | 1.01 | NaN  | 0.90 | 0.84 | NaN  |
| K7EJE8 | Lon protease homolog, mitochondrial                                                                                                            | LONP1    | 11 | 21.4 | 0     | 170.2 | 0.90 | 0.86 | 1.00 | NaN  | 0.83 | 0.97 | 0.63 | NaN  | 1.05 |
| K7EK07 | Histone H3;Histone H3.3                                                                                                                        | H3F3B    | 1  | 40.9 | 0.001 | 2.751 | 0.33 | 0.52 | NaN  | NaN  | NaN  | NaN  | NaN  | NaN  | NaN  |
| K7EQ02 | DAZ-associated protein 1                                                                                                                       | DAZAP1   | 5  | 22.6 | 0     | 25.6  | 1.34 | 1.14 | 1.34 | 1.93 | 1.15 | 1.11 | NaN  | 1.37 | 1.05 |
| K7EKL3 | Granulins;Acrogranin;Paragranulin;Granulin-1;Granulin-2;Granulin-3;Granulin-4;Granulin-5;Granulin-6;Granulin-7                                 | GRN      | 3  | 10.8 | 0     | 69.04 | NaN  | NaN  | NaN  | NaN  | 0.57 | 0.66 | NaN  | NaN  | 2.13 |
| K7EL20 | Eukaryotic translation initiation factor 3 subunit G                                                                                           | EIF3G    | 1  | 43.5 | 0     | 182.9 | 1.07 | 1.10 | 1.07 | 0.94 | 1.16 | 0.86 | 1.01 | 1.02 | 0.88 |
| K7ELD9 | Synaptogyrin-2                                                                                                                                 | SYNGR2   | 2  | 30.8 | 0.001 | 2.671 | NaN  | NaN  | NaN  | 1.03 | 0.84 | NaN  | NaN  | NaN  | NaN  |
| K7ELL7 | Glucosidase 2 subunit beta                                                                                                                     | PRKCSH   | 23 | 48   | 0     | 323.3 | 1.13 | 1.03 | 1.02 | 1.11 | 1.12 | 1.15 | 0.99 | 0.97 | 0.96 |
| K7ELP0 |                                                                                                                                                | TPM4     | 1  | 15.9 | 0     | 24.89 | 0.88 | 0.97 | 0.74 | NaN  | NaN  | 0.82 | 1.60 | 1.49 | 1.33 |
| K7ELS0 | Uncharacterized protein                                                                                                                        | C19orf43 | 1  | 10.6 | 0     | 3.023 | 0.98 | 1.26 | NaN  | 0.98 | 1.85 | 2.93 | NaN  | 0.91 | 1.14 |
| K7EM18 | Eukaryotic translation initiation factor 1;Eukaryotic translation initiation factor 1b                                                         | EIF1     | 6  | 62   | 0     | 49.15 | 0.86 | 1.03 | 1.09 | 1.72 | 1.01 | 1.07 | 1.01 | NaN  | NaN  |
| K7ENT6 |                                                                                                                                                | TPM4     | 2  | 63.6 | 0     | 40.36 | 1.27 | 1.27 | 1.18 | 1.21 | 0.94 | 1.18 | 1.44 | 1.63 | 1.49 |
| Q08E86 | Protein KIAA0100                                                                                                                               | KIAA0100 | 1  | 0.4  | 0.009 | 1.414 | NaN  | NaN  | NaN  | NaN  | 1.03 | 0.68 | NaN  | NaN  | 1.33 |
| K7EQX8 |                                                                                                                                                | MXRA7    | 1  | 73.3 | 0     | 24.03 | 1.16 | 1.84 | NaN  | 2.12 | NaN  | NaN  | NaN  | NaN  | 1.50 |
| K7ER90 |                                                                                                                                                | EIF3G    | 1  | 48.9 | 0     | 33.35 | 1.18 | 1.27 | 1.25 | 1.13 | 1.06 | 1.07 | 0.98 | 0.98 | 0.99 |
| K7ER96 | Thioredoxin-like protein 1                                                                                                                     | TXNL1    | 4  | 19.2 | 0     | 9.479 | 0.75 | 0.65 | 0.86 | 0.87 | 1.52 | 0.89 | 1.06 | 0.84 | 1.11 |
| K7ERF1 | Eukaryotic translation initiation factor 3 subunit K                                                                                           | EIF3K    | 7  | 42.2 | 0     | 24.88 | 1.18 | 0.96 | 1.27 | 1.13 | 1.13 | 0.97 | NaN  | 0.59 | NaN  |
| K7ERV3 | Thymidine kinase;Thymidine kinase, cytosolic                                                                                                   | TK1      | 2  | 11.2 | 0.007 | 1.635 | NaN  | NaN  | NaN  | 0.86 | 1.20 | NaN  | NaN  | NaN  | NaN  |
| M0QXB4 | Coatomer subunit epsilon                                                                                                                       | COPE     | 8  | 32.9 | 0     | 21.94 | 0.72 | 0.73 | 0.98 | 0.90 | 1.10 | 0.92 | 0.87 | 0.75 | 0.91 |
| M0QXN5 | Nuclear pore glycoprotein p62                                                                                                                  | NUP62    | 4  | 17.9 | 0     | 27.4  | NaN  | NaN  | 0.87 | 0.90 | 0.98 | NaN  | 0.87 | NaN  | NaN  |
| M0QYT0 |                                                                                                                                                |          | 0  | 42.7 | 0     | 5.035 | 1.21 | 1.10 | 1.20 | 0.96 | 1.53 | 1.18 | 0.77 | 0.81 | 1.01 |
| M0R0N4 | AP-2 complex subunit sigma                                                                                                                     | AP2S1    | 2  | 11.1 | 0.003 | 1.883 | 0.75 | 0.85 | NaN  | 0.73 | 1.00 | 0.95 | NaN  | 0.77 | 1.04 |
| M0R0F0 | 40S ribosomal protein S5;40S ribosomal protein S5, N-terminally processed                                                                      | RPS5     | 12 | 50   | 0     | 248.9 | 0.88 | 0.89 | 0.78 | 0.78 | 0.75 | 1.13 | 0.94 | 0.90 | 0.93 |
| M0R117 | 60S ribosomal protein L18a                                                                                                                     | RPL18A   | 9  | 53.9 | 0     | 84.35 | 0.82 | 0.81 | 0.79 | 0.83 | 0.73 | 0.80 | 0.72 | 0.70 | 1.01 |

|        |                                                                                                                    |         |    |      |       |       |      |      |      |      |      |      |      |      |      |
|--------|--------------------------------------------------------------------------------------------------------------------|---------|----|------|-------|-------|------|------|------|------|------|------|------|------|------|
| M0R208 | ATP-dependent Clp protease proteolytic subunit;ATP-dependent Clp protease                                          | CLPP    | 2  | 12.1 | 0.003 | 1.862 | 1.46 | 1.50 | NaN  | NaN  | 1.71 | NaN  | NaN  | NaN  | NaN  |
| O00116 | proteolytic subunit. mitochondrial Alkyldihydroxyacetonephosphate synthase, peroxisomal                            | AGPS    | 7  | 16.9 | 0     | 30.57 | 0.73 | 0.62 | 0.58 | NaN  | NaN  | 0.78 | 1.16 | 2.46 | 0.82 |
| O00148 | ATP-dependent RNA helicase DDX39A                                                                                  | DDX39A  | 3  | 48.7 | 0     | 61.82 | 0.74 | 0.80 | 0.69 | NaN  | NaN  | 0.99 | 0.71 | NaN  | 0.83 |
| O00151 | PDZ and LIM domain protein 1                                                                                       | PDLIM1  | 18 | 82.7 | 0     | 323.3 | 0.87 | 0.91 | 0.91 | 0.93 | 0.99 | 0.96 | 0.86 | 0.97 | 1.06 |
| O00154 | Cytosolic acyl coenzyme A thioester hydrolase                                                                      | ACOT7   | 5  | 15.5 | 0     | 23.3  | 1.28 | NaN  | 1.11 | NaN  | NaN  | 1.18 | NaN  | NaN  | 1.29 |
| O00170 | AH receptor-interacting protein                                                                                    | AIP     | 11 | 41.8 | 0     | 14.15 | 0.96 | 1.29 | 1.09 | 0.83 | 1.03 | 0.97 | 0.93 | 1.00 | 1.26 |
| O00203 | AP-3 complex subunit beta-1                                                                                        | AP3B1   | 5  | 8    | 0     | 6.681 | 2.06 | NaN  | NaN  | 1.18 | NaN  | NaN  | 1.04 | 1.05 | NaN  |
| O00231 | 26S proteasome non-ATPase regulatory subunit 11                                                                    | PSMD11  | 17 | 48.6 | 0     | 61.35 | 1.05 | 1.11 | 1.03 | 1.04 | 0.94 | 1.13 | 1.03 | 1.00 | 0.99 |
| O00232 | 26S proteasome non-ATPase regulatory subunit 12                                                                    | PSMD12  | 10 | 27.6 | 0     | 17.33 | 1.34 | 1.07 | 1.07 | 0.91 | 0.95 | 0.91 | NaN  | 1.46 | 1.00 |
| O00273 | DNA fragmentation factor subunit alpha                                                                             | DFFA    | 1  | 5.1  | 0.002 | 2.021 | 1.17 | 1.19 | NaN  | NaN  | NaN  | NaN  | NaN  | NaN  | 0.95 |
| O00299 | Chloride intracellular channel protein 1                                                                           | CLIC1   | 17 | 87.1 | 0     | 323.3 | 1.00 | 0.93 | 1.01 | 1.02 | 1.00 | 0.99 | 0.96 | 0.93 | 0.97 |
| O00303 | Eukaryotic translation initiation factor 3 subunit F                                                               | EIF3F   | 11 | 38.9 | 0     | 73.51 | 1.14 | 1.22 | 1.23 | 1.08 | 1.20 | 0.99 | 1.18 | 0.73 | 1.05 |
| O00410 | Importin-5                                                                                                         | IPO5    | 38 | 47.7 | 0     | 323.3 | 1.11 | 1.07 | 0.99 | 1.01 | 1.04 | 0.98 | 0.73 | 0.79 | 1.01 |
| O00422 | Histone deacetylase complex subunit SAP18                                                                          | SAP18   | 5  | 40.5 | 0     | 3.092 | 0.60 | NaN  | 1.44 | NaN  | 1.15 | 1.17 | 1.17 | NaN  | 1.37 |
| O00483 | Cytochrome c oxidase subunit NDUF4A                                                                                | NDUF4A  | 3  | 37   | 0     | 6.352 | 1.13 | 0.92 | 0.98 | 1.08 | 1.24 | 1.14 | 1.15 | 1.17 | NaN  |
| O00487 | 26S proteasome non-ATPase regulatory subunit 14                                                                    | PSMD14  | 6  | 34.8 | 0     | 89.9  | 0.86 | 0.88 | 1.11 | 0.92 | 0.98 | 1.09 | 0.89 | 0.79 | 1.20 |
| O00499 | Myc box-dependent-interacting protein 1                                                                            | BIN1    | 6  | 18.9 | 0     | 24.63 | 1.42 | 0.96 | 0.90 | NaN  | 3.51 | 0.73 | NaN  | 0.95 | 0.93 |
| O00505 | Importin subunit alpha-4                                                                                           | KPNA3   | 6  | 23.6 | 0     | 62.26 | 0.82 | 0.79 | 0.48 | 1.01 | 0.91 | 0.86 | 1.26 | 1.06 | 0.89 |
| O00560 | Syntenin-1                                                                                                         | SDCBP   | 2  | 13.8 | 0     | 18.49 | 0.82 | 0.87 | 0.78 | NaN  | NaN  | 0.85 | NaN  | NaN  | 0.81 |
| O00592 | Podocalyxin                                                                                                        | PODXL   | 7  | 17.4 | 0     | 99.48 | 2.17 | 2.51 | 2.14 | 1.15 | 1.18 | 1.06 | 1.95 | 1.98 | 2.85 |
| O00622 | Protein CYR61                                                                                                      | CYR61   | 21 | 68.2 | 0     | 234.2 | 2.49 | 2.33 | 2.61 | 1.27 | 1.34 | 1.20 | 1.39 | 1.38 | 1.25 |
| O00629 | Importin subunit alpha-3                                                                                           | KPNA4   | 7  | 29.2 | 0     | 54.42 | 1.37 | 0.91 | 0.93 | 0.95 | 1.43 | 0.63 | NaN  | 0.97 | 0.77 |
| O00743 | Serine/threonine-protein phosphatase 6 catalytic subunit;Serine/threonine-protein phosphatase 6 catalytic subunit, | PPP6C   | 3  | 11.1 | 0.008 | 1.48  | NaN  | 0.48 | NaN  | 0.69 | 0.95 | 0.45 | NaN  | NaN  | NaN  |
| O00764 | N-terminally processed Pyridoxal kinase                                                                            | PDXK    | 8  | 41.7 | 0     | 264.8 | 1.18 | 1.31 | 1.10 | 0.78 | 0.93 | 1.17 | 1.12 | NaN  | 1.20 |
| O14493 | Claudin-4;Claudin-9;Claudin-6;Claudin-3                                                                            | CLDN4   | 2  | 12.9 | 0     | 15.07 | 1.52 | 0.79 | NaN  | NaN  | NaN  | 0.98 | 1.39 | 1.45 | NaN  |
| O14561 | Acyl carrier protein, mitochondrial;Acyl carrier protein                                                           | NDUFAB1 | 3  | 21.2 | 0     | 9.133 | 0.98 | 1.09 | 1.01 | 1.19 | 1.07 | 1.09 | 0.93 | 0.93 | 1.04 |

|        |                                                                                                                             |          |    |      |       |       |      |      |      |      |      |      |      |      |      |
|--------|-----------------------------------------------------------------------------------------------------------------------------|----------|----|------|-------|-------|------|------|------|------|------|------|------|------|------|
| O14617 | AP-3 complex subunit delta-1                                                                                                | AP3D1    | 6  | 9    | 0     | 21.65 | 0.79 | 0.66 | NaN  | NaN  | 0.52 | 1.00 | NaN  | NaN  | 0.58 |
| O14737 | Programmed cell death protein 5                                                                                             | PDCD5    | 7  | 56   | 0     | 218.2 | 1.20 | 1.11 | 1.31 | 1.21 | 1.13 | 1.06 | 1.51 | 1.19 | 1.15 |
| O14744 | Protein arginine N-methyltransferase 5;Protein arginine N-methyltransferase 5, N-terminally processed                       | PRMT5    | 6  | 11.9 | 0     | 35.91 | 1.07 | 0.94 | 1.27 | NaN  | 0.80 | 0.95 | NaN  | 1.40 | 0.88 |
| O14745 | Na(+)/H(+) exchange regulatory cofactor NHE-RF1                                                                             | SLC9A3R1 | 7  | 28.5 | 0     | 35.57 | NaN  | 0.79 | 1.08 | 1.13 | 0.67 | NaN  | NaN  | 0.48 | 0.78 |
| O14763 | Tumor necrosis factor receptor superfamily member 10B                                                                       | TNFRSF10 | 1  | 3.9  | 0.009 | 1.457 | NaN  | 1.85 | 1.21 | NaN  | NaN  | NaN  | NaN  | NaN  | NaN  |
| O14818 | Proteasome subunit alpha type-7                                                                                             | PSMA7    | 14 | 66.5 | 0     | 323.3 | 0.98 | 1.10 | 0.97 | 0.94 | 1.00 | 0.99 | 0.92 | 0.92 | 0.97 |
| O14828 | Secretory carrier-associated membrane protein 3                                                                             | SCAMP3   | 3  | 12.4 | 0     | 6.226 | 0.89 | 1.43 | NaN  | 2.16 | NaN  | 1.41 | NaN  | 1.43 | NaN  |
| O14907 | Tax1-binding protein 3                                                                                                      | TAX1BP3  | 3  | 39.5 | 0     | 14.17 | 1.18 | 1.45 | NaN  | NaN  | NaN  | NaN  | NaN  | NaN  | NaN  |
| O14929 | Histone acetyltransferase type B catalytic subunit                                                                          | HAT1     | 3  | 12.9 | 0.001 | 2.618 | NaN  | 0.64 | 0.84 | NaN  | 0.94 | NaN  | 1.35 | NaN  | NaN  |
| O14964 | Hepatocyte growth factor-regulated tyrosine kinase substrate                                                                | HGS      | 7  | 10.7 | 0     | 6.788 | 0.96 | 1.11 | 0.86 | 0.98 | 0.86 | 0.95 | NaN  | 1.14 | 1.27 |
| O14974 | Protein phosphatase 1 regulatory subunit 12A                                                                                | PPP1R12A | 11 | 12.9 | 0     | 91.9  | NaN  | 1.32 | NaN  | NaN  | 2.78 | 0.61 | NaN  | NaN  | 1.86 |
| O14980 | Exportin-1                                                                                                                  | XPO1     | 26 | 31.6 | 0     | 173.3 | 0.95 | 0.96 | 0.95 | 0.93 | 1.04 | 0.93 | 0.88 | 1.00 | 0.94 |
| O15067 | Phosphoribosylformylglycinamide synthase                                                                                    | PFAS     | 6  | 7.2  | 0     | 9.764 | NaN  | 0.89 | NaN  | 0.72 | 0.85 | NaN  | NaN  | 0.84 | 1.14 |
| O15131 | Importin subunit alpha-6;Importin subunit alpha-5;Importin subunit alpha-5, N-terminally processed;Importin subunit alpha-7 | KPNA5    | 3  | 6    | 0     | 8.008 | NaN  | 0.88 | 0.93 | 1.10 | 0.99 | 0.77 | 0.95 | 0.98 | 0.97 |
| O15143 | Actin-related protein 2/3 complex subunit 1B                                                                                | ARPC1B   | 4  | 55.1 | 0     | 319.7 | 0.87 | 1.08 | 0.91 | 0.95 | 0.91 | 0.96 | 0.84 | 0.98 | 0.90 |
| O15144 | Actin-related protein 2/3 complex subunit 2                                                                                 | ARPC2    | 13 | 40.3 | 0     | 66.77 | 0.82 | 0.95 | 0.87 | 1.16 | 1.02 | 0.90 | 1.08 | 1.06 | 0.69 |
| O15145 | Actin-related protein 2/3 complex subunit 3                                                                                 | ARPC3    | 8  | 42.1 | 0     | 33.33 | 0.97 | 0.95 | 0.99 | 1.13 | 1.00 | 0.97 | 0.96 | 1.12 | 1.06 |
| O15173 | Membrane-associated progesterone receptor component 2                                                                       | PGRMC2   | 5  | 29.6 | 0     | 35.45 | NaN  | NaN  | NaN  | 0.86 | 0.91 | 0.84 | 1.02 | 2.17 | 1.26 |
| O15212 | Prefoldin subunit 6                                                                                                         | PFDN6    | 5  | 32.6 | 0     | 27.76 | 0.87 | NaN  | 0.89 | 1.19 | NaN  | NaN  | 0.97 | 1.17 | NaN  |
| O15231 | Zinc finger protein 185                                                                                                     | ZNF185   | 12 | 27.4 | 0     | 90.95 | 1.03 | 0.96 | NaN  | 1.19 | 1.00 | 1.04 | 1.22 | 1.85 | 1.78 |
| Q5T8U5 | Surfeit locus protein 4                                                                                                     | SURF4    | 4  | 26.9 | 0     | 29.83 | 1.04 | 0.95 | 0.84 | 1.05 | 1.16 | 1.02 | 0.78 | 0.65 | 0.78 |
| O15355 | Protein phosphatase 1G                                                                                                      | PPM1G    | 13 | 33.3 | 0     | 234.5 | 1.08 | 1.11 | 1.28 | 0.98 | 1.14 | 1.00 | 0.95 | 1.03 | 0.99 |
| O15371 | Eukaryotic translation initiation factor 3 subunit D                                                                        | EIF3D    | 15 | 43.1 | 0     | 88.33 | 1.09 | 0.96 | 1.08 | 1.36 | 0.92 | 1.01 | 0.89 | 0.91 | 0.93 |
| O15400 | Syntaxin-7                                                                                                                  | STX7     | 5  | 25.7 | 0     | 17.37 | 1.41 | NaN  | NaN  | NaN  | 0.88 | 1.00 | 0.67 | 0.87 | NaN  |
| O15427 | Monocarboxylate transporter 4                                                                                               | SLC16A3  | 6  | 15.3 | 0     | 38.68 | 1.11 | 1.02 | 0.99 | 0.93 | 0.97 | 1.21 | 1.17 | 1.20 | 1.32 |

|        |                                                                           |          |    |      |       |       |      |      |      |      |      |      |      |      |      |
|--------|---------------------------------------------------------------------------|----------|----|------|-------|-------|------|------|------|------|------|------|------|------|------|
| O15460 | Prolyl 4-hydroxylase subunit alpha-2                                      | P4HA2    | 5  | 15.3 | 0     | 13.19 | NaN  | 1.28 | NaN  | NaN  | NaN  | NaN  | 1.23 | NaN  | 1.38 |
| O15498 | Synaptobrevin homolog YKT6                                                | YKT6     | 2  | 11.1 | 0.001 | 2.54  | 0.80 | NaN  | 0.82 | NaN  | 0.71 | 1.22 | NaN  | NaN  | NaN  |
| O15511 | Actin-related protein 2/3 complex subunit 5                               | ARPC5    | 3  | 40.4 | 0     | 60.31 | 1.17 | 1.05 | 1.09 | 0.90 | 0.96 | 1.01 | NaN  | 0.96 | 1.14 |
| O43143 | Pre-mRNA-splicing factor ATP-dependent RNA helicase DHX15                 | DHX15    | 14 | 20.4 | 0     | 33.13 | 0.99 | 0.70 | 0.64 | 0.97 | 1.26 | 0.95 | 0.78 | 0.61 | 0.94 |
| O43172 | U4/U6 small nuclear ribonucleoprotein Prp4                                | PRPF4    | 3  | 7.1  | 0     | 7.048 | 1.12 | NaN  | 1.21 | NaN  | NaN  | NaN  | NaN  | NaN  | 1.18 |
| O43237 | Cytoplasmic dynein 1 light intermediate chain 2                           | DYNC1LI2 | 6  | 30.1 | 0     | 24.86 | 1.50 | 1.15 | 0.67 | 0.73 | NaN  | NaN  | 0.71 | 0.44 | 0.80 |
| O43242 | 26S proteasome non-ATPase regulatory subunit 3                            | PSMD3    | 13 | 28.1 | 0     | 259.4 | 1.16 | 1.27 | 1.14 | 1.00 | 1.03 | 1.07 | 0.95 | 1.01 | 0.95 |
| O43264 | Centromere/kinetochore protein zw10 homolog                               | ZW10     | 3  | 6.2  | 0     | 24.3  | 0.83 | 0.84 | 0.80 | NaN  | 0.77 | NaN  | NaN  | NaN  | 0.89 |
| O43291 | Kunitz-type protease inhibitor 2                                          | SPINT2   | 2  | 9.5  | 0.001 | 2.599 | 1.08 | 1.31 | 1.54 | NaN  | NaN  | NaN  | NaN  | NaN  | 1.08 |
| O43294 | Transforming growth factor beta-1-induced transcript 1 protein            | TGFB1I1  | 2  | 5.4  | 0     | 10.06 | NaN  | 1.32 | 0.88 | NaN  | NaN  | 1.00 | NaN  | NaN  | 0.97 |
| O43390 | Heterogeneous nuclear ribonucleoprotein R                                 | HNRNPR   | 17 | 43.4 | 0     | 58.51 | 0.79 | 0.82 | 0.92 | 0.76 | 0.84 | 0.91 | 1.05 | 1.10 | 0.87 |
| O43399 | Tumor protein D54                                                         | TPD52L2  | 12 | 68.9 | 0     | 323.3 | 1.18 | 1.06 | 1.11 | 1.09 | 1.37 | 1.02 | 0.98 | 1.04 | 0.97 |
| O43447 | Peptidyl-prolyl cis-trans isomerase H;Peptidyl-prolyl cis-trans isomerase | PPIH     | 4  | 38.4 | 0     | 5.263 | 0.80 | NaN  | NaN  | NaN  | 0.80 | 0.90 | NaN  | NaN  | NaN  |
| O43493 | Trans-Golgi network integral membrane protein 2                           | TGOLN2   | 4  | 14   | 0     | 119.3 | 1.53 | 1.85 | 1.31 | NaN  | 1.50 | 1.30 | 0.63 | NaN  | 1.21 |
| O43592 | Exportin-T                                                                | XPOT     | 5  | 7.8  | 0     | 9.218 | 0.89 | 0.78 | 0.88 | NaN  | 1.10 | 1.08 | NaN  | NaN  | NaN  |
| O43615 | Mitochondrial import inner membrane translocase subunit TIM44             | TIMM44   | 6  | 15.3 | 0     | 15.14 | 0.95 | 1.09 | 1.29 | 0.96 | NaN  | 1.07 | 0.90 | 1.13 | 1.04 |
| O43684 | Mitotic checkpoint protein BUB3                                           | BUB3     | 8  | 35.4 | 0     | 27.91 | 1.05 | 0.95 | 1.03 | 0.73 | 1.04 | 0.96 | 0.81 | 1.04 | 1.04 |
| O43707 | Alpha-actinin-4                                                           | ACTN4    | 45 | 74.2 | 0     | 323.3 | 1.05 | 1.04 | 1.02 | 1.05 | 0.99 | 1.00 | 1.01 | 1.02 | 1.03 |
| O43719 | HIV Tat-specific factor 1                                                 | HTATSF1  | 2  | 3    | 0.003 | 1.822 | 1.07 | 1.61 | NaN  | NaN  | NaN  | 1.12 | NaN  | NaN  | NaN  |
| O43765 | Small glutamine-rich tetratricopeptide repeat-containing protein alpha    | SGTA     | 8  | 29.4 | 0     | 77.26 | 1.19 | 1.22 | 1.32 | 0.98 | 1.23 | 1.13 | 1.18 | 0.80 | 1.23 |
| O43776 | Asparagine--tRNA ligase, cytoplasmic                                      | NARS     | 8  | 19.5 | 0     | 13.35 | 0.72 | 0.75 | 0.72 | 1.79 | 0.71 | 1.04 | NaN  | NaN  | 1.40 |
| O43852 | Calumenin                                                                 | CALU     | 20 | 72.4 | 0     | 323.3 | 1.16 | 1.09 | 1.19 | 1.17 | 1.09 | 1.11 | 1.17 | 1.17 | 0.97 |
| O60361 | Putative nucleoside diphosphate kinase                                    | NME2P1   | 1  | 66.4 | 0.001 | 2.415 | 1.32 | 1.36 | 1.41 | 1.40 | 1.22 | 1.26 | 1.61 | 1.49 | 1.57 |
| O60488 | Long-chain-fatty-acid--CoA ligase 4                                       | ACSL4    | 11 | 29.3 | 0     | 55.16 | 0.85 | 0.89 | 0.61 | 1.24 | 0.75 | 0.63 | 1.24 | 1.14 | 1.08 |
| O60493 | Sorting nexin-3                                                           | SNX3     | 9  | 67.3 | 0     | 31.17 | 1.56 | 1.38 | 1.52 | 1.27 | 1.57 | 1.36 | 1.13 | 1.13 | 1.25 |
| O60502 | Protein O-GlcNAcase                                                       | MGEA5    | 2  | 3.8  | 0     | 3.574 | NaN  | NaN  | 0.77 | NaN  | 0.64 | 0.58 | NaN  | NaN  | NaN  |
| O60506 | Heterogeneous nuclear ribonucleoprotein Q                                 | SYNCRIP  | 5  | 47.8 | 0     | 323.3 | 0.86 | 0.82 | 0.84 | 0.86 | 0.91 | 0.95 | 0.75 | 0.81 | 0.90 |

|        |                                                                                                                                                                                                                                                                                |           |     |      |       |       |      |      |      |      |      |      |      |      |      |
|--------|--------------------------------------------------------------------------------------------------------------------------------------------------------------------------------------------------------------------------------------------------------------------------------|-----------|-----|------|-------|-------|------|------|------|------|------|------|------|------|------|
| O60568 | Procollagen-lysine,2-oxoglutarate 5-dioxygenase 3                                                                                                                                                                                                                              | PLOD3     | 10  | 18.8 | 0     | 29.07 | 1.19 | 1.44 | 1.19 | NaN  | 0.97 | 1.07 | NaN  | 1.06 | 1.26 |
| O60664 | Perilipin-3                                                                                                                                                                                                                                                                    | PLIN3     | 21  | 66.4 | 0     | 323.3 | 0.96 | 0.89 | 0.94 | 1.00 | 0.98 | 0.91 | 1.05 | 1.10 | 1.04 |
| O60701 | UDP-glucose 6-dehydrogenase                                                                                                                                                                                                                                                    | UGDH      | 7   | 19.8 | 0     | 11.05 | 1.22 | 1.21 | 1.12 | 1.56 | 1.33 | 1.42 | NaN  | 1.00 | NaN  |
| O60749 | Sorting nexin-2                                                                                                                                                                                                                                                                | SNX2      | 4   | 13.9 | 0     | 6.876 | NaN  | 0.96 | NaN  | NaN  | NaN  | 0.71 | 0.87 | 1.06 | NaN  |
| O60763 | General vesicular transport factor p115                                                                                                                                                                                                                                        | USO1      | 14  | 21.3 | 0     | 323.3 | 1.07 | 1.02 | 1.18 | 0.98 | 0.93 | 0.88 | NaN  | 1.30 | 1.11 |
| U3KQK0 | Histone H2B;Histone H2B type 1-L;Histone H2B type 1-M;Histone H2B type 1-N;Histone H2B type 1-H;Histone H2B type 2-F;Histone H2B type 1-C/E/F/G/I;Histone H2B type 1-D;Histone H2B type 1-K;Histone H2B type 1-S;Histone H2B type Endothelial differentiation-related factor 1 | HIST1H2BI | 2   | 42.8 | 0     | 11.52 | 0.47 | 0.43 | 0.44 | 0.46 | 0.46 | 0.45 | 0.49 | 0.33 | 0.33 |
| O60869 | DnaJ homolog subfamily A member 2                                                                                                                                                                                                                                              | EDF1      | 6   | 43.2 | 0     | 37.4  | 0.99 | 1.04 | 0.92 | 0.97 | 0.90 | 1.02 | 0.96 | 0.98 | 0.81 |
| O60884 | Protein CutA                                                                                                                                                                                                                                                                   | DNAJA2    | 6   | 24.5 | 0     | 28.64 | 1.31 | 1.06 | 1.40 | NaN  | 0.91 | 1.10 | NaN  | NaN  | 0.83 |
| O60888 | WD repeat-containing protein 1                                                                                                                                                                                                                                                 | CUTA      | 4   | 40.8 | 0     | 92.14 | 0.90 | 1.03 | 1.07 | 0.89 | 0.86 | 0.94 | 0.91 | 1.00 | 0.86 |
| O75083 | Copine-3                                                                                                                                                                                                                                                                       | WDR1      | 33  | 67   | 0     | 323.3 | 0.85 | 0.82 | 0.80 | 0.86 | 0.86 | 0.82 | 1.08 | 0.94 | 0.99 |
| O75131 | Gamma-glutamylcyclotransferase                                                                                                                                                                                                                                                 | CPNE3     | 11  | 26.1 | 0     | 79.9  | 0.84 | 0.82 | 0.83 | 0.73 | 0.86 | 0.92 | 0.73 | 1.22 | 1.10 |
| O75223 | Programmed cell death protein 6                                                                                                                                                                                                                                                | GGCT      | 4   | 31.9 | 0     | 86.19 | 0.69 | 0.89 | 1.37 | 0.60 | NaN  | 0.77 | 1.35 | 0.98 | 0.83 |
| O75340 | V-type proton ATPase subunit G                                                                                                                                                                                                                                                 | PDCD6     | 5   | 39.3 | 0     | 61.98 | 0.71 | 0.78 | 0.85 | 0.77 | 0.83 | 0.90 | NaN  | NaN  | 0.98 |
| O75348 | Vacuolar protein sorting-associated protein 4B                                                                                                                                                                                                                                 | ATP6V1G1  | 2   | 21.2 | 0     | 4.913 | 1.71 | 1.52 | NaN  | NaN  | 1.22 | NaN  | NaN  | NaN  | 1.74 |
| O75351 | Core histone macro-H2A.1;Histone H2A                                                                                                                                                                                                                                           | VPS4B     | 2   | 9.9  | 5E-04 | 2.856 | 1.16 | 1.07 | 1.05 | NaN  | NaN  | 1.00 | NaN  | NaN  | 0.93 |
| O75367 | SH3 domain-binding glutamic acid-rich-like protein                                                                                                                                                                                                                             | H2AFY     | 11  | 41.9 | 0     | 195.8 | 1.21 | 1.11 | 1.11 | 1.03 | 1.03 | 1.21 | 1.11 | 1.17 | 1.26 |
| O75368 | Filamin-B                                                                                                                                                                                                                                                                      | SH3BGRL   | 4   | 51.8 | 0     | 12.22 | 1.04 | 1.06 | 1.12 | 1.06 | NaN  | 1.06 | 1.12 | 1.09 | 1.25 |
| O75369 | Vesicle-trafficking protein                                                                                                                                                                                                                                                    | FLNB      | 129 | 73.6 | 0     | 323.3 | 1.12 | 1.09 | 1.10 | 1.03 | 1.01 | 1.01 | 1.11 | 1.08 | 1.09 |
| O75396 | Vacuolar protein sorting-associated protein 26A                                                                                                                                                                                                                                | SEC22B    | 8   | 42.3 | 0     | 89.19 | 0.99 | 1.05 | 1.06 | 1.04 | 1.03 | 1.07 | 0.97 | 1.01 | 0.95 |
| O75436 | PC4 and SFRS1-interacting protein                                                                                                                                                                                                                                              | VPS26A    | 10  | 38.5 | 0     | 64.05 | 0.92 | 1.19 | 1.27 | 0.93 | 0.77 | 1.15 | NaN  | NaN  | 0.69 |
| O75475 | Erlin-1                                                                                                                                                                                                                                                                        | PSIP1     | 3   | 10.8 | 0     | 6.28  | 0.60 | 0.47 | NaN  | NaN  | NaN  | NaN  | NaN  | NaN  | 0.75 |
| O75477 | Serine/arginine-rich splicing factor 10                                                                                                                                                                                                                                        | ERLIN1    | 3   | 14.7 | 0     | 75.84 | 0.94 | 1.02 | 1.05 | 0.98 | 1.05 | 1.03 | 0.74 | 0.80 | 0.78 |
| Q5JRI1 | Barrier-to-autointegration factor;Barrier-to-autointegration factor. N-terminally processed                                                                                                                                                                                    | SRSF10    | 3   | 22.7 | 0     | 15.21 | NaN  | NaN  | 0.71 | NaN  | 0.67 | 0.84 | NaN  | NaN  | NaN  |
| O75531 | Cold shock domain-containing protein E1                                                                                                                                                                                                                                        | BANF1     | 8   | 67.4 | 0     | 128   | 1.21 | 1.26 | 1.23 | 1.11 | 1.15 | 1.18 | 1.26 | 1.26 | 1.31 |
| O75533 | Nucleoplasmin-3                                                                                                                                                                                                                                                                | SF3B1     | 27  | 30.9 | 0     | 249.8 | 0.95 | 0.94 | 0.91 | 0.98 | 0.97 | 0.97 | 0.93 | 0.98 | 0.91 |
| O75534 |                                                                                                                                                                                                                                                                                | CSDE1     | 9   | 14   | 0     | 8.572 | 1.50 | 1.32 | 1.17 | 0.59 | 1.05 | 1.33 | 0.86 | 0.93 | 1.06 |
| O75607 |                                                                                                                                                                                                                                                                                | NPM3      | 2   | 20.8 | 0     | 31.32 | 0.90 | NaN  | 1.20 | NaN  | NaN  | NaN  | NaN  | NaN  | NaN  |

|        |                                                                                     |          |    |      |       |       |      |      |      |      |      |      |      |      |      |
|--------|-------------------------------------------------------------------------------------|----------|----|------|-------|-------|------|------|------|------|------|------|------|------|------|
| O75643 | U5 small nuclear ribonucleoprotein 200 kDa                                          | SNRNP200 | 18 | 10.9 | 0     | 38.16 | 0.75 | 0.97 | 1.00 | NaN  | 0.94 | 1.11 | 1.29 | 1.18 | 1.10 |
| O75663 | TIP41-like protein                                                                  | TIPRL    | 5  | 28.3 | 0     | 6.936 | 1.36 | 1.42 | 1.26 | NaN  | NaN  | 1.02 | 1.27 | NaN  | 1.66 |
| O75695 | Protein XRP2                                                                        | RP2      | 3  | 8.3  | 0.008 | 1.547 | 1.28 | 0.90 | 0.82 | 0.98 | 0.65 | NaN  | NaN  | 0.96 | 1.00 |
| O75822 | Eukaryotic translation initiation factor 3 subunit J                                | EIF3J    | 5  | 20.5 | 0     | 5.276 | 1.51 | NaN  | NaN  | 1.06 | 0.76 | NaN  | 1.01 | 0.88 | NaN  |
| O75844 | CAAX prenyl protease 1 homolog                                                      | ZMPSTE24 | 5  | 13.9 | 0     | 18.89 | 1.10 | 1.62 | 1.90 | 1.05 | 1.01 | NaN  | 0.84 | 1.03 | 1.06 |
| O75874 | Isocitrate dehydrogenase [NADP] cytoplasmic                                         | IDH1     | 14 | 35   | 0     | 27.31 | 0.67 | 0.65 | 0.80 | 0.66 | 0.74 | 0.69 | 0.71 | 0.69 | 0.74 |
| O75915 | PRA1 family protein 3                                                               | ARL6IP5  | 3  | 20.7 | 0     | 26.66 | 0.72 | 0.96 | 0.93 | 0.87 | 0.78 | 1.02 | 0.83 | 0.66 | 0.81 |
| O75934 | Pre-mRNA-splicing factor SPF27                                                      | BCAS2    | 3  | 29.8 | 0     | 9.632 | 1.00 | 0.76 | NaN  | NaN  | NaN  | NaN  | NaN  | NaN  | NaN  |
| O75937 | DnaJ homolog subfamily C member 8                                                   | DNAJC8   | 5  | 32   | 0     | 32.58 | 0.91 | 0.85 | 1.23 | 0.76 | NaN  | 0.81 | NaN  | NaN  | 1.03 |
| O75947 | ATP synthase subunit d, mitochondrial                                               | ATP5H    | 6  | 51.6 | 0     | 23.52 | 0.97 | 1.00 | 1.03 | 1.09 | 1.05 | 1.17 | 1.17 | 1.25 | 0.96 |
| O75976 | Carboxypeptidase D                                                                  | CPD      | 12 | 11.4 | 0     | 131.6 | 1.21 | 1.26 | 0.98 | 1.00 | 1.35 | 1.18 | 0.95 | 1.29 | 0.67 |
| O76003 | Glutaredoxin-3                                                                      | GLRX3    | 10 | 41.5 | 0     | 65.54 | 1.02 | 1.03 | 1.07 | 0.96 | 0.79 | 0.86 | 0.92 | 1.15 | 0.85 |
| O76021 | Ribosomal L1 domain-containing protein 1                                            | RSL1D1   | 7  | 16.1 | 0     | 14.99 | NaN  | 0.75 | 1.18 | NaN  | 1.01 | 1.41 | NaN  | NaN  | NaN  |
| O76094 | Signal recognition particle subunit SRP72                                           | SRP72    | 9  | 24.1 | 0     | 19.14 | 0.83 | 1.05 | NaN  | 0.84 | 1.20 | NaN  | NaN  | NaN  | 0.58 |
| O94760 | N(G),N(G)-dimethylarginine dimethylaminohydrolase 1                                 | DDAH1    | 11 | 50.9 | 0     | 44.43 | 1.17 | 0.96 | 1.12 | 1.23 | 0.98 | 1.07 | 1.28 | 1.30 | 1.27 |
| O94804 | Serine/threonine-protein kinase                                                     | STK10    | 5  | 6.3  | 0     | 14.27 | NaN  | NaN  | NaN  | 1.09 | 1.06 | NaN  | 0.97 | NaN  | NaN  |
| O94826 | Mitochondrial import receptor subunit TOM70                                         | TOMM70A  | 12 | 29.1 | 0     | 113.1 | 1.08 | 1.16 | 1.05 | 1.27 | 1.18 | 1.26 | 1.13 | 1.00 | 0.80 |
| O94919 | Endonuclease domain-containing 1 protein                                            | ENDOD1   | 2  | 6.8  | 0     | 4.182 | 0.97 | 1.22 | NaN  | NaN  | NaN  | NaN  | 1.60 | NaN  | NaN  |
| O94925 | Glutaminase kidney isoform, mitochondrial                                           | GLS      | 11 | 24.7 | 0     | 82.57 | 1.19 | 1.94 | 1.49 | 1.33 | 1.09 | 1.20 | 1.26 | 1.32 | 1.22 |
| O94973 | AP-2 complex subunit alpha-2                                                        | AP2A2    | 6  | 19.4 | 0     | 14.13 | 0.80 | 1.05 | 0.80 | NaN  | 0.86 | 0.76 | NaN  | NaN  | 0.87 |
| O95197 | Reticulon-3                                                                         | RTN3     | 1  | 1.1  | 0     | 6.785 | NaN  | 1.13 | 0.95 | 0.79 | 0.81 | 1.00 | 0.91 | 0.83 | NaN  |
| O95202 | LETM1 and EF-hand domain-containing protein 1,                                      | LETM1    | 7  | 15.2 | 0     | 27.07 | 0.82 | 0.86 | 0.91 | NaN  | 0.80 | NaN  | NaN  | NaN  | 0.98 |
| O95292 | Vesicle-associated membrane protein-associated protein B/C                          | VAPB     | 7  | 38.3 | 0     | 12.01 | 1.49 | 0.87 | 1.57 | NaN  | 1.38 | NaN  | NaN  | 0.71 | 1.83 |
| O95336 | 6-phosphogluconolactonase Bifunctional 3-phosphoadenosine 5-phosphosulfate synthase | PGLS     | 12 | 67.4 | 0     | 42.15 | 1.06 | 1.04 | 1.19 | 1.10 | 1.30 | 1.00 | 1.04 | 1.06 | NaN  |
| O95340 | 2,Sulfate adenylyltransferase;Adenylyl-sulfate kinase                               | PAPSS2   | 5  | 13.4 | 0     | 13.66 | 0.81 | 0.91 | 0.82 | NaN  | 1.04 | 1.13 | 1.37 | 0.58 | 0.67 |
| O95347 | Structural maintenance of chromosomes protein 2                                     | SMC2     | 14 | 17.5 | 0     | 22.98 | 0.73 | NaN  | 0.73 | 0.83 | 0.97 | 0.94 | 0.81 | NaN  | 0.81 |
| O95372 | Acyl-protein thioesterase 2                                                         | LYPLA2   | 3  | 29.9 | 0     | 42.73 | 0.78 | 0.91 | NaN  | NaN  | NaN  | 1.29 | NaN  | NaN  | 0.71 |
| O95373 | Importin-7                                                                          | IPO7     | 23 | 28.4 | 0     | 323.3 | 1.13 | 1.16 | 1.11 | 0.97 | 0.98 | 1.16 | 0.86 | 0.89 | 1.14 |
| Q5H8X8 | Urotensin-2                                                                         | UTS2     | 1  | 5.8  | 0     | 8.813 | 0.98 | 1.03 | 1.04 | 0.98 | 0.90 | 0.89 | 1.08 | 1.11 | 1.02 |

|        |                                                                                                                                                                        |         |    |      |       |       |      |      |      |      |      |      |      |      |      |
|--------|------------------------------------------------------------------------------------------------------------------------------------------------------------------------|---------|----|------|-------|-------|------|------|------|------|------|------|------|------|------|
| O95433 | Activator of 90 kDa heat shock protein ATPase homolog 1                                                                                                                | AHSA1   | 9  | 37.6 | 0     | 52.89 | 1.19 | 1.39 | 1.02 | NaN  | 1.13 | 1.09 | NaN  | 1.09 | 0.91 |
| O95456 | Proteasome assembly chaperone 1                                                                                                                                        | PSMG1   | 5  | 22.6 | 0     | 10.29 | 0.71 | 1.07 | 0.77 | 1.22 | 0.70 | 0.91 | 0.98 | 1.36 | 0.87 |
| O95573 | Long-chain-fatty-acid--CoA ligase 3                                                                                                                                    | ACSL3   | 8  | 18.2 | 0     | 69.32 | 0.84 | NaN  | 0.90 | NaN  | NaN  | 1.15 | 1.08 | 1.69 | 1.47 |
| O95630 | STAM-binding protein                                                                                                                                                   | STAMBSP | 3  | 8.5  | 0.007 | 1.652 | 0.91 | NaN  | 1.05 | NaN  | NaN  | 1.03 | NaN  | NaN  | 0.76 |
| O95747 | Serine/threonine-protein kinase OSR1                                                                                                                                   | OXR1    | 10 | 23.3 | 0     | 117.9 | 1.16 | 1.06 | 1.14 | 1.05 | 1.08 | 1.12 | 1.41 | 1.03 | 1.12 |
| O95777 | U6 snRNA-associated Sm-like protein LSM8                                                                                                                               | LSM8    | 5  | 71.9 | 0     | 18.16 | 1.10 | 1.04 | 1.09 | 0.92 | 1.13 | 1.00 | 1.02 | NaN  | 1.15 |
| O95782 | AP-2 complex subunit alpha-1                                                                                                                                           | AP2A1   | 19 | 37.6 | 0     | 124.9 | 0.89 | 0.99 | 0.92 | 0.97 | 0.92 | 0.96 | 0.85 | 0.88 | 1.13 |
| O95793 | Double-stranded RNA-binding protein Staufen homolog 1                                                                                                                  | STAU1   | 7  | 16.6 | 0     | 33.45 | 1.20 | 1.43 | 1.15 | 1.10 | 0.85 | 1.21 | 1.14 | NaN  | 0.96 |
| O95810 | Serum deprivation-response protein                                                                                                                                     | SDPR    | 6  | 18.6 | 0     | 9.281 | 0.76 | 0.87 | 0.70 | 0.89 | 0.85 | 0.44 | 0.80 | 0.60 | 1.14 |
| O95816 | BAG family molecular chaperone regulator 2                                                                                                                             | BAG2    | 10 | 50.2 | 0     | 53.65 | 0.88 | 0.93 | 0.88 | 0.88 | 0.81 | 1.02 | 0.99 | NaN  | 0.85 |
| O95817 | BAG family molecular chaperone regulator 3                                                                                                                             | BAG3    | 13 | 26.3 | 0     | 46.83 | 1.30 | 1.70 | 1.59 | 1.51 | 1.55 | 1.53 | NaN  | 1.26 | NaN  |
| O95833 | Chloride intracellular channel protein 3                                                                                                                               | CLIC3   | 3  | 18.2 | 0     | 4.488 | 0.90 | 0.84 | 0.72 | NaN  | NaN  | 0.46 | 1.44 | 1.47 | 1.50 |
| O95864 | Fatty acid desaturase 2                                                                                                                                                | FADS2   | 3  | 7.4  | 0     | 3.182 | 1.04 | NaN  | 1.27 | NaN  | NaN  | NaN  | NaN  | NaN  | NaN  |
| O95865 | N(G),N(G)-dimethylarginine dimethylaminohydrolase 2                                                                                                                    | DDAH2   | 3  | 17.5 | 0     | 14.37 | NaN  | 1.02 | 1.32 | 0.90 | NaN  | NaN  | 1.20 | 0.97 | 1.15 |
| O95881 | Thioredoxin domain-containing protein 12                                                                                                                               | TXNDC12 | 3  | 22.7 | 0     | 3.612 | 1.02 | 1.02 | 1.01 | NaN  | NaN  | 1.05 | NaN  | NaN  | 1.04 |
| O96008 | Mitochondrial import receptor subunit TOM40 homolog                                                                                                                    | TOMM40  | 6  | 26   | 0     | 69.93 | 1.00 | 0.75 | 0.79 | 0.76 | 0.94 | 0.74 | NaN  | 0.98 | 0.78 |
| O96019 | Actin-like protein 6A                                                                                                                                                  | ACTL6A  | 2  | 6.8  | 0     | 3.043 | NaN  | NaN  | 0.82 | NaN  | 0.69 | 0.52 | NaN  | NaN  | 0.86 |
| P00338 | L-lactate dehydrogenase A chain                                                                                                                                        | LDHA    | 30 | 81.6 | 0     | 323.3 | 0.94 | 0.96 | 0.92 | 1.03 | 1.03 | 0.97 | 1.11 | 1.07 | 1.06 |
| P00367 | Glutamate dehydrogenase 1, mitochondrial;                                                                                                                              | GLUD1   | 20 | 43.4 | 0     | 244.1 | 0.97 | 0.93 | 1.03 | 0.86 | 1.02 | 0.93 | 0.84 | 0.86 | 1.00 |
| P00387 | Glutamate dehydrogenase 2, mitochondrial NADH-cytochrome b5 reductase 3;NADH-cytochrome b5 reductase 3 membrane-bound form;NADH-cytochrome b5 reductase 3 soluble form | CYB5R3  | 10 | 52.2 | 0     | 189.4 | 1.04 | 1.09 | 0.97 | 0.91 | 0.99 | 1.04 | 0.85 | 0.98 | 1.07 |
| P00390 | Glutathione reductase, mitochondrial                                                                                                                                   | GSR     | 2  | 4.8  | 0     | 3.402 | 0.93 | 0.81 | 0.92 | 1.18 | 1.10 | 1.05 | 0.89 | 0.78 | 0.82 |
| P00403 | Cytochrome c oxidase subunit 2                                                                                                                                         | MT-CO2  | 4  | 24.7 | 0     | 58.59 | 1.07 | 1.02 | 0.95 | 1.18 | 1.08 | 1.08 | 0.96 | 0.93 | 0.98 |
| P00441 | Superoxide dismutase [Cu-Zn]                                                                                                                                           | SOD1    | 8  | 77.9 | 0     | 323.3 | 1.32 | 1.26 | 1.27 | 1.14 | 1.12 | 1.14 | 1.07 | 1.03 | 1.07 |
| P00491 | Purine nucleoside phosphorylase                                                                                                                                        | PNP     | 6  | 31.5 | 0     | 10.55 | 0.82 | 0.86 | 0.91 | 1.07 | 0.54 | 0.70 | NaN  | NaN  | 0.72 |
| P00492 | Hypoxanthine-guanine phosphoribosyltransferase                                                                                                                         | HPRT1   | 8  | 45   | 0     | 137.5 | 1.01 | 1.29 | 1.04 | 1.08 | 1.09 | 1.11 | 1.09 | 1.14 | 1.00 |

|        |                                                                                                                           |         |    |      |       |       |      |      |      |      |      |      |      |      |      |
|--------|---------------------------------------------------------------------------------------------------------------------------|---------|----|------|-------|-------|------|------|------|------|------|------|------|------|------|
| P00505 | Aspartate aminotransferase, mitochondrial                                                                                 | GOT2    | 16 | 39.5 | 0     | 139   | 1.16 | 1.14 | 1.12 | 1.08 | 1.07 | 1.14 | 1.08 | 0.90 | 1.07 |
| P00533 | Epidermal growth factor receptor;Receptor protein-tyrosine kinase                                                         | EGFR    | 14 | 17.9 | 0     | 41.73 | 1.24 | 0.95 | 1.13 | 1.13 | NaN  | 1.15 | 1.17 | 1.28 | 1.11 |
| P00558 | Phosphoglycerate kinase 1                                                                                                 | PGK1    | 35 | 82.5 | 0     | 323.3 | 1.18 | 1.20 | 1.18 | 1.21 | 1.21 | 1.21 | 1.12 | 1.17 | 1.20 |
| Q5T9B7 | Adenylate kinase isoenzyme 1                                                                                              | AK1     | 5  | 31.9 | 0     | 10.95 | 0.86 | 1.07 | 0.67 | 0.90 | NaN  | 0.66 | 1.00 | 0.74 | 0.74 |
| P00846 | ATP synthase subunit a                                                                                                    | MT-ATP6 | 1  | 4.4  | 0.008 | 1.537 | 0.98 | 0.93 | NaN  | 1.18 | NaN  | NaN  | NaN  | 1.46 | NaN  |
| P01111 | KRas;GTPase KRas, N-terminally processed;GTPase                                                                           | NRAS    | 4  | 33.3 | 0.001 | 2.441 | 0.69 | 0.45 | 0.62 | 0.72 | NaN  | 0.81 | 0.30 | 0.50 | 0.41 |
| P02545 | HRas;GTPase HRas. N-Prelamin-A/C;Lamin-A/C                                                                                | LMNA    | 3  | 69.4 | 0     | 323.3 | 0.94 | 0.94 | 0.92 | 1.03 | 1.03 | 0.99 | 0.99 | 1.04 | 0.98 |
| P02786 | Transferrin receptor protein 1;Transferrin receptor protein 1, serum form                                                 | TFRC    | 30 | 44.2 | 0     | 323.3 | 1.27 | 1.30 | 1.31 | 1.30 | 1.40 | 1.50 | 1.12 | 1.08 | 1.25 |
| P02795 | Metallothionein-2;Metallothionein-                                                                                        | MT2A    | 2  | 67.2 | 0     | 151.4 | 1.91 | 1.94 | 1.80 | 1.58 | 1.58 | 1.52 | 1.08 | 1.22 | 1.30 |
| P04040 | Catalase                                                                                                                  | CAT     | 16 | 40.8 | 0     | 60.08 | 1.10 | 1.08 | 1.02 | 0.96 | 0.99 | 1.24 | 1.03 | 1.02 | 0.96 |
| P04075 | Fructose-bisphosphate aldolase A;Fructose-bisphosphate                                                                    | ALDOA   | 27 | 84.1 | 0     | 323.3 | 1.03 | 1.06 | 1.05 | 1.07 | 1.10 | 1.05 | 1.11 | 1.09 | 1.09 |
| P04080 | Cystatin-B                                                                                                                | CSTB    | 7  | 88.8 | 0     | 323.3 | 1.16 | 1.35 | 1.09 | 1.01 | 1.19 | 1.20 | 0.67 | 0.58 | 1.11 |
| P04083 | Annexin A1                                                                                                                | ANXA1   | 25 | 71.1 | 0     | 323.3 | 0.94 | 0.95 | 0.92 | 0.99 | 0.99 | 0.99 | 0.86 | 0.86 | 0.86 |
| P04179 | Superoxide dismutase [Mn], mitochondrial                                                                                  | SOD2    | 6  | 30.6 | 0     | 31.37 | 0.99 | 0.75 | 0.90 | 0.82 | 1.08 | 1.13 | 0.58 | 1.00 | 0.66 |
| P04181 | Ornithine aminotransferase, mitochondrial;Ornithine aminotransferase, hepatic form;Ornithine aminotransferase, renal form | OAT     | 15 | 48.7 | 0     | 210.1 | 0.71 | 0.59 | 0.65 | 0.74 | 0.78 | 0.77 | 0.92 | 1.00 | 1.11 |
| P04406 | Glyceraldehyde-3-phosphate dehydrogenase                                                                                  | GAPDH   | 27 | 80.9 | 0     | 323.3 | 0.93 | 0.90 | 0.92 | 0.98 | 0.99 | 0.96 | 0.95 | 0.95 | 0.93 |
| P04792 | Heat shock protein beta-1                                                                                                 | HSPB1   | 11 | 78   | 0     | 323.3 | 0.86 | 0.82 | 0.86 | 0.82 | 0.82 | 0.84 | 1.00 | 0.90 | 0.89 |
| P04843 | Dolichyl-diphosphooligosaccharide--protein glycosyltransferase                                                            | RPN1    | 23 | 44.8 | 0     | 263.3 | 1.10 | 0.97 | 1.06 | 0.97 | 0.98 | 1.08 | 1.05 | 1.00 | 0.98 |
| P04844 | Dolichyl-diphosphooligosaccharide--protein glycosyltransferase                                                            | RPN2    | 13 | 31.2 | 0     | 204.6 | 0.98 | 0.96 | 0.97 | 1.16 | 1.11 | 1.06 | 1.20 | 1.17 | 0.99 |
| P04899 | Guanine nucleotide-binding protein G(i) subunit alpha-2;Guanine nucleotide-binding protein G(i) subunit alpha-1           | GNAI2   | 5  | 34.9 | 0     | 43.46 | 0.72 | 0.76 | 0.82 | 0.77 | 0.89 | 0.96 | 0.87 | 0.77 | 0.96 |
| P05023 | Sodium/potassium-transporting ATPase subunit alpha-1                                                                      | ATP1A1  | 32 | 36   | 0     | 323.3 | 0.94 | 0.99 | 1.01 | 1.26 | 1.31 | 1.30 | 0.77 | 0.75 | 0.86 |
| P05026 | Sodium/potassium-transporting ATPase subunit beta-1                                                                       | ATP1B1  | 10 | 36.3 | 0     | 26.75 | 1.04 | 0.78 | 0.83 | 1.16 | 1.14 | 1.63 | 1.41 | 0.85 | NaN  |



|        |                                                                                     |           |    |      |   |       |       |      |       |      |      |      |      |       |       |
|--------|-------------------------------------------------------------------------------------|-----------|----|------|---|-------|-------|------|-------|------|------|------|------|-------|-------|
| P05091 | Aldehyde dehydrogenase, mitochondrial                                               | ALDH2     | 8  | 23   | 0 | 33.59 | 1.21  | NaN  | NaN   | NaN  | 0.55 | 0.95 | NaN  | NaN   | 0.72  |
| P05114 | Non-histone chromosomal protein HMG-14                                              | HMGN1     | 7  | 50   | 0 | 195.2 | 0.69  | 0.76 | 0.73  | 0.52 | 0.80 | 0.71 | 0.77 | 0.60  | 0.86  |
| P05121 | Plasminogen activator inhibitor 1 ADP/ATP translocase                               | SERPINE1  | 12 | 40   | 0 | 241.6 | 13.08 | 8.99 | 10.74 | NaN  | NaN  | 1.76 | NaN  | 16.26 | 13.89 |
| P05141 | 2:ADP/ATP translocase 2, N-terminally processed                                     | SLC25A5   | 5  | 44.6 | 0 | 39.26 | 1.05  | 1.12 | 1.11  | 0.96 | 1.11 | 1.07 | 0.98 | 0.99  | 1.05  |
| P05198 | Eukaryotic translation initiation factor 2 subunit 1                                | EIF2S1    | 16 | 54.6 | 0 | 323.3 | 0.98  | 0.82 | 0.94  | 1.07 | 0.92 | 1.02 | 0.80 | 0.90  | 0.75  |
| P05204 | Non-histone chromosomal protein HMG-17                                              | HMGN2     | 4  | 45.6 | 0 | 215.3 | 0.76  | 0.76 | NaN   | 0.95 | 0.61 | 0.49 | NaN  | 0.66  | 0.68  |
| P05386 | 60S acidic ribosomal protein P1                                                     | RPLP1     | 2  | 51.8 | 0 | 234.9 | 0.94  | 1.01 | 0.98  | 0.88 | 1.03 | 0.89 | 0.99 | 0.94  | 1.01  |
| P05387 | 60S acidic ribosomal protein P2                                                     | RPLP2     | 8  | 78.3 | 0 | 323.3 | 0.98  | 1.11 | 1.02  | 0.94 | 0.98 | 0.91 | 0.99 | 0.96  | 0.98  |
| P05388 | 60S acidic ribosomal protein P0-like                                                | RPLP0     | 18 | 65.6 | 0 | 323.3 | 0.86  | 0.85 | 0.87  | 0.85 | 0.81 | 0.85 | 0.88 | 0.82  | 0.79  |
| P05455 | Lupus La protein                                                                    | SSB       | 26 | 57.4 | 0 | 154.1 | 0.82  | 0.87 | 0.89  | 0.86 | 0.94 | 0.86 | 0.92 | 0.93  | 0.82  |
| P05556 | Integrin beta-1                                                                     | ITGB1     | 25 | 36.8 | 0 | 323.3 | 1.37  | 1.33 | 1.31  | 1.16 | 1.17 | 1.21 | 1.28 | 1.24  | 1.39  |
| P05783 | Keratin, type I cytoskeletal 18                                                     | KRT18     | 33 | 76.5 | 0 | 323.3 | 1.21  | 1.21 | 1.02  | 0.97 | 0.93 | 0.96 | 1.48 | 1.26  | 1.16  |
| P05976 | Myosin light chain 1/3, skeletal muscle isoform;Myosin light chain 3                | MYL1      | 2  | 8.2  | 0 | 190.4 | 0.93  | 0.81 | 0.82  | 1.05 | 1.04 | 0.99 | 0.67 | 0.63  | 0.76  |
| P06493 | Cyclin-dependent kinase 1                                                           | CDK1      | 14 | 62   | 0 | 45.21 | 0.95  | 1.04 | 0.85  | 1.05 | 1.12 | 0.98 | 1.03 | 0.95  | 0.84  |
| P06576 | ATP synthase subunit beta, mitochondrial;ATP synthase subunit beta                  | ATP5B     | 21 | 57.5 | 0 | 323.3 | 0.98  | 1.02 | 1.02  | 1.07 | 1.06 | 1.03 | 0.84 | 0.78  | 0.87  |
| R4GN98 | Protein S100;Protein S100-A6                                                        | S100A6    | 7  | 60   | 0 | 67.15 | 0.98  | 0.96 | 0.87  | 0.98 | 0.94 | 0.98 | 0.89 | 0.84  | 0.74  |
| P06733 | Alpha-enolase                                                                       | ENO1      | 33 | 79.5 | 0 | 323.3 | 0.96  | 0.95 | 0.97  | 1.03 | 0.99 | 1.03 | 0.97 | 0.91  | 0.95  |
| P06737 | Glycogen phosphorylase, liver form;Alpha-1,4 glucan phosphorylase                   | PYGL      | 25 | 44.2 | 0 | 253.5 | 0.72  | 0.89 | 0.93  | 0.94 | 0.68 | 0.99 | 0.73 | 1.01  | 1.04  |
| P06748 | Nucleophosmin                                                                       | NPM1      | 18 | 56.1 | 0 | 323.3 | 0.94  | 0.96 | 0.92  | 0.96 | 1.01 | 0.98 | 0.91 | 0.91  | 0.85  |
| Q16778 | Histone H2B type 2-E;Histone H2B type 1-B;Histone H2B type 1-O;Histone H2B type 1-J | HIST2H2BI | 0  | 56.3 | 0 | 323.3 | 0.79  | 0.78 | 0.77  | 0.79 | 0.77 | 0.80 | 0.66 | 0.74  | 0.67  |
| P07108 | Acyl-CoA-binding protein                                                            | DBI       | 7  | 73.6 | 0 | 323.3 | 0.83  | 0.76 | 0.85  | 0.96 | 1.07 | 0.88 | 0.87 | 0.78  | 0.90  |
| P07195 | L-lactate dehydrogenase B chain;L-lactate dehydrogenase                             | LDHB      | 16 | 52.4 | 0 | 323.3 | 0.96  | 0.95 | 0.94  | 0.92 | 0.96 | 0.98 | 0.94 | 0.88  | 0.92  |
| P07237 | Protein disulfide-isomerase                                                         | P4HB      | 39 | 78   | 0 | 323.3 | 1.07  | 1.08 | 1.09  | 1.06 | 1.08 | 1.11 | 1.04 | 1.03  | 1.05  |
| P07355 | Annexin A2;Annexin;Putative annexin A2-like protein                                 | ANXA2     | 16 | 79.9 | 0 | 323.3 | 0.82  | 0.82 | 0.81  | 0.86 | 0.83 | 0.84 | 0.98 | 0.94  | 0.91  |
| P07384 | Calpain-1 catalytic subunit                                                         | CAPN1     | 12 | 20.7 | 0 | 37.55 | 0.72  | 0.74 | 0.81  | 0.85 | 0.88 | 0.73 | 1.02 | 1.25  | 0.81  |
| Q5JP53 | Tubulin beta chain                                                                  | TUBB      | 5  | 66   | 0 | 323.3 | 0.41  | 0.40 | 0.41  | 0.49 | 0.47 | 0.47 | 0.85 | 0.81  | 0.83  |
| P07602 | Prosaposin;Saposin-A;Saposin-B-Val;Saposin-B;Saposin-C;Saposin-D                    | PSAP      | 13 | 26.1 | 0 | 56.57 | 1.55  | 1.47 | 1.52  | 1.55 | 1.26 | 1.46 | 1.36 | 1.63  | 1.37  |

|        |                                                                                                            |          |    |      |   |       |      |      |      |      |      |      |      |      |      |
|--------|------------------------------------------------------------------------------------------------------------|----------|----|------|---|-------|------|------|------|------|------|------|------|------|------|
| Q5URX0 | Beta-hexosaminidase subunit beta;Beta-hexosaminidase subunit beta chain B;Beta-hexosaminidase subunit beta | HEXB     | 4  | 15.7 | 0 | 6.247 | 1.01 | NaN  | NaN  | 1.20 | 1.18 | 1.27 | NaN  | NaN  | NaN  |
| P07737 | Profilin-1                                                                                                 | PFN1     | 12 | 89.3 | 0 | 323.3 | 1.10 | 1.15 | 1.15 | 1.16 | 1.11 | 1.08 | 1.10 | 1.01 | 0.97 |
| P07741 | Adenine phosphoribosyltransferase                                                                          | APRT     | 9  | 58.9 | 0 | 43.54 | 1.49 | 1.30 | 2.18 | NaN  | 1.60 | 0.96 | 1.25 | 1.10 | 1.21 |
| P07814 | Bifunctional glutamate/proline--tRNA ligase;Glutamate--tRNA ligase;Proline--tRNA ligase                    | EPRS     | 34 | 32.8 | 0 | 211.2 | 0.96 | 0.78 | 0.97 | 0.89 | 0.84 | 0.89 | 0.74 | 0.80 | 0.92 |
| P07858 | Cathepsin B;Cathepsin B light chain;Cathepsin B heavy chain                                                | CTSB     | 6  | 24.2 | 0 | 36.75 | 1.44 | 0.98 | 1.33 | 1.32 | 1.23 | 1.60 | 1.36 | 1.24 | 1.31 |
| P07900 | Heat shock protein HSP 90-alpha                                                                            | HSP90AA1 | 33 | 61.3 | 0 | 323.3 | 1.14 | 1.17 | 1.15 | 1.17 | 1.22 | 1.20 | 0.88 | 0.83 | 0.84 |
| P07919 | Cytochrome b-c1 complex subunit 6,                                                                         | UQCRH    | 2  | 28.6 | 0 | 7.431 | 1.78 | 1.69 | 1.10 | NaN  | 1.11 | 1.20 | 1.73 | NaN  | NaN  |
| P07954 | mitochondrial;Cytochrome b-c1 Fumarate hydratase,                                                          | FH       | 15 | 48.4 | 0 | 59.62 | 0.98 | 1.06 | NaN  | NaN  | 0.90 | 1.23 | 1.36 | 0.95 | 0.60 |
| P08133 | Annexin A6;Annexin                                                                                         | ANXA6    | 15 | 63   | 0 | 323.3 | 0.88 | 0.84 | 0.91 | 0.89 | 0.87 | 0.92 | 1.12 | 1.01 | 0.94 |
| Q5JR08 | Rho-related GTP-binding protein RhoC                                                                       | RHOC     | 2  | 45.2 | 0 | 3.774 | 1.13 | 1.05 | 1.09 | NaN  | 1.06 | 1.09 | NaN  | NaN  | 1.09 |
| P08238 | Heat shock protein HSP 90-beta                                                                             | HSP90AB1 | 28 | 64.4 | 0 | 323.3 | 1.16 | 1.15 | 1.16 | 1.08 | 1.08 | 1.11 | 0.92 | 0.89 | 0.94 |
| P08240 | Signal recognition particle receptor subunit alpha                                                         | SRPR     | 5  | 12.1 | 0 | 18.94 | 0.68 | 0.77 | 0.68 | NaN  | NaN  | 0.69 | NaN  | NaN  | NaN  |
| P08243 | Asparagine synthetase [glutamine-hydrolyzing]                                                              | ASNS     | 5  | 14.1 | 0 | 5.348 | NaN  | 0.81 | NaN  | 0.49 | 0.69 | 0.85 | NaN  | 0.76 | 0.82 |
| P08559 | Pyruvate dehydrogenase E1 component subunit alpha,                                                         | PDHA1    | 11 | 29   | 0 | 38.17 | 0.67 | 0.72 | 0.81 | 1.03 | 0.82 | 0.87 | 0.98 | 0.96 | 1.16 |
| P08574 | somatic form, mitochondrial Cytochrome c1, heme protein,                                                   | CYC1     | 2  | 8.6  | 0 | 3.586 | 1.05 | 0.94 | 1.10 | 1.06 | 1.12 | 1.18 | NaN  | 1.16 | 1.21 |
| P08579 | mitochondrial U2 small nuclear ribonucleoprotein B                                                         | SNRPB2   | 1  | 11.6 | 0 | 70.84 | 1.00 | 1.02 | 1.33 | NaN  | 1.43 | 1.16 | NaN  | NaN  | 1.15 |
| P08582 | Melanotransferrin                                                                                          | MF12     | 8  | 15.3 | 0 | 29.24 | 0.91 | 1.07 | 0.90 | NaN  | NaN  | 1.07 | NaN  | 1.03 | 1.19 |
| P08621 | U1 small nuclear ribonucleoprotein 70 kDa                                                                  | SNRNP70  | 12 | 30.7 | 0 | 233.4 | 0.90 | 1.03 | 0.89 | 0.91 | 0.85 | 1.06 | 0.76 | 0.64 | 0.81 |
| P08670 | Vimentin                                                                                                   | VIM      | 47 | 88.8 | 0 | 323.3 | 1.02 | 1.00 | 1.00 | 0.94 | 0.96 | 0.95 | 1.14 | 1.10 | 1.10 |
| P08754 | Guanine nucleotide-binding protein G(k) subunit alpha                                                      | GNAI3    | 2  | 25.7 | 0 | 31.42 | 0.51 | 0.67 | 0.56 | 0.58 | NaN  | 0.73 | 0.81 | NaN  | 0.78 |
| P08758 | Annexin A5;Annexin                                                                                         | ANXA5    | 27 | 80.6 | 0 | 323.3 | 1.07 | 1.08 | 1.13 | 1.00 | 1.06 | 1.02 | 0.96 | 0.97 | 0.95 |
| P09012 | U1 small nuclear ribonucleoprotein A                                                                       | SNRPA    | 5  | 21.3 | 0 | 9.592 | 0.74 | 0.75 | 0.81 | 0.77 | 0.74 | 0.73 | 0.69 | 0.81 | 0.73 |
| P09104 | Gamma-enolase;Enolase                                                                                      | ENO2     | 13 | 63.1 | 0 | 323.3 | 1.11 | 1.09 | 1.20 | 1.15 | 1.27 | 1.15 | 1.11 | 1.20 | 1.17 |
| P09211 | Glutathione S-transferase P                                                                                | GSTP1    | 12 | 69.5 | 0 | 323.3 | 0.99 | 0.90 | 1.01 | 1.00 | 1.14 | 0.96 | 1.05 | 1.01 | 1.04 |
| P09382 | Galectin-1                                                                                                 | LGALS1   | 9  | 77.8 | 0 | 323.3 | 1.10 | 1.03 | 1.07 | 1.06 | 1.09 | 1.07 | 1.18 | 1.14 | 1.12 |
| Q5T7C4 | High mobility group protein B1;Putative high mobility group protein B1-like 1                              | HMGB1    | 9  | 48.7 | 0 | 120.7 | 0.88 | 0.86 | 0.88 | 0.95 | 0.94 | 0.98 | 0.92 | 0.84 | 0.81 |

|        |                                                                                                                                                    |         |    |      |       |       |      |      |      |      |      |      |      |      |      |
|--------|----------------------------------------------------------------------------------------------------------------------------------------------------|---------|----|------|-------|-------|------|------|------|------|------|------|------|------|------|
| P09496 | Clathrin light chain A                                                                                                                             | CLTA    | 7  | 19.4 | 0     | 9.796 | 1.27 | 1.01 | 1.12 | 0.93 | 1.08 | 0.95 | 1.02 | 1.05 | 0.98 |
| P09497 | Clathrin light chain B                                                                                                                             | CLTB    | 8  | 24.9 | 0     | 8.794 | 0.88 | 1.31 | 0.85 | 1.10 | 1.04 | 1.68 | 0.82 | 0.92 | 1.46 |
| P09525 | Annexin A4;Annexin                                                                                                                                 | ANXA4   | 12 | 40.1 | 0     | 323.3 | 0.83 | 0.90 | 0.99 | 1.56 | 1.09 | 1.07 | 0.90 | 0.98 | 0.94 |
| P09543 | 2,3-cyclic-nucleotide 3-phosphodiesterase                                                                                                          | CNP     | 5  | 20   | 0     | 152.2 | 0.83 | 0.98 | 1.33 | 1.18 | 0.96 | 1.04 | 1.16 | NaN  | 0.64 |
| P09622 | Dihydrolipoyl dehydrogenase, mitochondrial;Dihydrolipoyl dehydrogenase                                                                             | DLD     | 14 | 35.8 | 0     | 238.7 | 1.02 | 1.01 | 1.05 | 0.97 | 0.93 | 0.97 | 1.01 | 1.07 | 1.02 |
| P09874 | Poly [ADP-ribose] polymerase 1                                                                                                                     | PARP1   | 26 | 32.7 | 0     | 86.42 | 0.78 | 0.75 | 0.77 | 0.81 | 0.97 | 0.82 | 0.90 | 0.84 | 1.05 |
| P09960 | Leukotriene A-4 hydrolase                                                                                                                          | LTA4H   | 16 | 34.7 | 0     | 52.5  | 0.65 | 0.74 | 0.77 | 1.05 | 0.89 | 1.04 | 1.49 | 0.93 | 0.71 |
| P09972 | Fructose-bisphosphate aldolase C;Fructose-bisphosphate                                                                                             | ALDOC   | 4  | 28.3 | 0     | 237.3 | 1.23 | 1.14 | 1.06 | 1.25 | 1.14 | 1.20 | 1.17 | 1.23 | 1.15 |
| Q71UI9 | Histone H2A.V;Histone H2A.Z;Histone H2A                                                                                                            | H2AFV   | 2  | 31.2 | 0     | 13.49 | NaN  | 0.83 | NaN  | 0.64 | NaN  | NaN  | 0.54 | NaN  | 1.10 |
| P0DN76 | Splicing factor U2AF 35 kDa subunit                                                                                                                | U2AF1   | 7  | 32.9 | 0     | 42.96 | 1.46 | 1.23 | 1.02 | 1.04 | NaN  | 0.79 | 1.01 | 1.03 | 0.88 |
| P10155 | 60 kDa SS-A/Ro                                                                                                                                     | TROVE2  | 2  | 4.1  | 0     | 4.793 | 0.69 | 0.86 | 0.86 | NaN  | NaN  | 0.83 | NaN  | NaN  | 0.72 |
| P10301 | Ras-related protein R-Ras Dihydrolipoyllysine-residue acetyltransferase component of pyruvate dehydrogenase complex,                               | RRAS    | 1  | 19.7 | 0.008 | 1.476 | 1.06 | 0.98 | 1.08 | 0.86 | NaN  | 0.53 | NaN  | 0.73 | 1.12 |
| P10515 | mitochondrial;Acetyltransferase component of pyruvate dehydrogenase complex,                                                                       | DLAT    | 12 | 25.7 | 0     | 54.78 | 1.00 | 0.89 | 0.88 | 0.97 | 0.91 | 0.93 | 0.88 | 0.73 | 0.89 |
| P10599 | Thioredoxin                                                                                                                                        | TXN     | 9  | 88.6 | 0     | 135.8 | 1.22 | 1.18 | 1.16 | 1.17 | 1.17 | 1.16 | 1.11 | 0.95 | 0.97 |
| P10606 | Cytochrome c oxidase subunit 5B, mitochondrial                                                                                                     | COX5B   | 6  | 31   | 0     | 7.049 | 1.06 | 0.90 | 1.14 | 0.93 | 1.19 | 1.15 | 1.26 | 1.14 | 1.17 |
| X6R5C5 | Carboxypeptidase;Lysosomal protective protein;Lysosomal protective protein 32 kDa chain;Lysosomal protective protein 20 kDa chain                  | CTSA    | 6  | 16.8 | 0     | 25.66 | 1.44 | 1.34 | 1.44 | 1.17 | 1.30 | 1.21 | 2.04 | 1.51 | 1.54 |
| P10644 | cAMP-dependent protein kinase type I-alpha regulatory subunit;cAMP-dependent protein kinase type I-alpha regulatory subunit N-terminally processed | PRKAR1A | 6  | 19.2 | 0     | 41.88 | 0.86 | 1.14 | 1.30 | 0.79 | 1.45 | 0.92 | NaN  | 0.92 | 1.27 |
| P10768 | S-formylglutathione hydrolase                                                                                                                      | ESD     | 8  | 52.5 | 0     | 97.23 | NaN  | 0.95 | 1.00 | 0.89 | 0.86 | 0.85 | 0.78 | 0.76 | 0.67 |
| P10809 | 60 kDa heat shock protein, mitochondrial                                                                                                           | HSPD1   | 38 | 72.3 | 0     | 323.3 | 1.19 | 1.19 | 1.18 | 1.19 | 1.21 | 1.19 | 1.00 | 1.00 | 1.01 |
| P11021 | 78 kDa glucose-regulated protein                                                                                                                   | HSPA5   | 39 | 57.3 | 0     | 323.3 | 0.93 | 1.00 | 1.04 | 0.91 | 0.94 | 0.98 | 0.98 | 1.00 | 1.01 |
| P11047 | Laminin subunit gamma-1                                                                                                                            | LAMC1   | 1  | 1.4  | 0     | 3.372 | 8.86 | 1.98 | 1.49 | NaN  | NaN  | NaN  | NaN  | NaN  | 1.39 |
| P11142 | Heat shock cognate 71 kDa protein                                                                                                                  | HSPA8   | 27 | 72.3 | 0     | 323.3 | 1.30 | 1.31 | 1.31 | 1.27 | 1.26 | 1.25 | 0.93 | 0.91 | 0.93 |
| P11166 | Solute carrier family 2, facilitated glucose transporter member 1                                                                                  | SLC2A1  | 8  | 15.2 | 0     | 299.8 | 1.15 | 1.22 | 1.30 | 1.00 | 1.06 | 1.01 | 1.21 | 0.92 | 1.26 |

|        |                                                                 |         |    |      |       |       |      |      |      |      |      |      |      |      |      |
|--------|-----------------------------------------------------------------|---------|----|------|-------|-------|------|------|------|------|------|------|------|------|------|
| P11177 | Pyruvate dehydrogenase E1 component subunit beta, mitochondrial | PDHB    | 11 | 42.9 | 0     | 109.2 | 1.08 | 0.52 | 0.95 | 1.00 | 1.13 | 1.06 | 1.05 | 1.14 | 1.27 |
| P11216 | Glycogen phosphorylase, brain form                              | PYGB    | 27 | 48.2 | 0     | 166.4 | 0.89 | 0.79 | 0.79 | 0.87 | 0.77 | 0.89 | 0.95 | 0.85 | 0.94 |
| P11233 | Ras-related protein Ral-A                                       | RALA    | 2  | 21.8 | 0     | 43.17 | 0.89 | 1.08 | 0.83 | 1.19 | 1.05 | 0.93 | 1.24 | 1.17 | 0.72 |
| P11279 | Lysosome-associated membrane glycoprotein 1                     | LAMP1   | 3  | 8.6  | 0     | 98.51 | 1.07 | 1.10 | 1.05 | 1.11 | 0.91 | 1.32 | 0.81 | 0.98 | 0.96 |
| P11388 | DNA topoisomerase 2-alpha                                       | TOP2A   | 3  | 5.3  | 0     | 6.997 | NaN  | NaN  | NaN  | NaN  | 1.87 | 1.80 | NaN  | NaN  | NaN  |
| P11413 | Glucose-6-phosphate 1-dehydrogenase                             | G6PD    | 28 | 64.7 | 0     | 323.3 | 0.94 | 0.89 | 1.01 | 1.08 | 1.07 | 1.10 | 0.83 | 0.92 | 0.96 |
| P11498 | Pyruvate carboxylase, mitochondrial                             | PC      | 22 | 26.1 | 0     | 72.31 | 0.90 | 0.85 | 0.81 | 0.88 | 1.00 | 0.90 | 0.84 | 0.99 | 0.94 |
| P11717 | Cation-independent mannose-6-phosphate receptor                 | IGF2R   | 7  | 3.2  | 0     | 5.257 | 1.39 | 0.60 | 0.89 | 0.96 | NaN  | NaN  | NaN  | NaN  | NaN  |
| P11766 | Alcohol dehydrogenase class-3                                   | ADH5    | 10 | 40.1 | 0     | 57.47 | 0.85 | NaN  | 0.73 | 0.86 | 0.47 | 0.84 | 0.85 | 1.05 | 0.97 |
| P11908 | Ribose-phosphate pyrophosphokinase 2                            | PRPS2   | 1  | 27.7 | 0     | 5.664 | 0.74 | 0.76 | 0.50 | NaN  | NaN  | NaN  | NaN  | NaN  | 0.76 |
| P11940 | Polyadenylate-binding protein 1;Polyadenylate-binding protein   | PABPC1  | 20 | 53.6 | 0     | 323.3 | 0.91 | 1.00 | 0.86 | 1.09 | 1.05 | 1.07 | 0.98 | 0.87 | 0.73 |
| P12004 | Proliferating cell nuclear antigen                              | PCNA    | 12 | 56.3 | 0     | 323.3 | 1.00 | 0.99 | 0.98 | 1.06 | 0.97 | 1.03 | 0.97 | 0.89 | 0.92 |
| P12235 | ADP/ATP translocase 1                                           | SLC25A4 | 2  | 47.7 | 0.004 | 1.802 | 0.97 | NaN  | 0.74 | NaN  | NaN  | 0.66 | NaN  | NaN  | NaN  |
| P12236 | ADP/ATP translocase 3, N-terminally processed                   | SLC25A6 | 6  | 66.8 | 0     | 265.3 | 1.04 | 1.02 | 1.03 | 1.06 | 1.00 | 1.08 | 0.95 | 0.93 | 0.95 |
| P12268 | Inosine-5-monophosphate dehydrogenase 2                         | IMPDH2  | 24 | 51.6 | 0     | 229.5 | 0.92 | 0.99 | 0.95 | 0.98 | 0.99 | 0.93 | 0.88 | 0.84 | 0.94 |
| P12270 | Nucleoprotein TPR                                               | TPR     | 20 | 11.2 | 0     | 53.14 | 0.94 | 1.24 | 0.99 | 0.74 | 0.88 | 1.69 | NaN  | 1.35 | 0.89 |
| P12277 | Creatine kinase B-type                                          | CKB     | 4  | 12.3 | 0     | 26.41 | 2.08 | 2.01 | 0.94 | NaN  | 1.00 | NaN  | NaN  | NaN  | NaN  |
| P12429 | Annexin A3;Annexin                                              | ANXA3   | 18 | 59.1 | 0     | 309.1 | 0.99 | 0.86 | 0.87 | 0.99 | 0.93 | 0.99 | 1.02 | 1.01 | 0.94 |
| P12814 | Alpha-actinin-1                                                 | ACTN1   | 41 | 73.2 | 0     | 323.3 | 1.19 | 1.16 | 1.17 | 1.10 | 1.04 | 1.08 | 1.12 | 1.22 | 1.18 |
| P12955 | Xaa-Pro dipeptidase                                             | PEPD    | 9  | 21.7 | 0     | 39.74 | NaN  | 1.10 | NaN  | NaN  | NaN  | 1.16 | 0.86 | 1.24 | NaN  |
| P12956 | X-ray repair cross-complementing protein 6                      | XRCC6   | 27 | 47.3 | 0     | 311.8 | 0.89 | 0.88 | 0.90 | 0.83 | 0.85 | 0.98 | 0.83 | 0.89 | 0.86 |
| P13010 | X-ray repair cross-complementing protein 5                      | XRCC5   | 28 | 45.1 | 0     | 323.3 | 0.98 | 0.92 | 0.92 | 0.90 | 0.97 | 0.99 | 0.97 | 0.89 | 0.89 |
| P13073 | Cytochrome c oxidase subunit 4 isoform 1, mitochondrial         | COX4I1  | 6  | 31.4 | 0     | 10.17 | 1.01 | 0.97 | 0.93 | 1.19 | NaN  | 0.98 | 0.98 | 0.75 | 0.80 |
| P13473 | Lysosome-associated membrane glycoprotein 2                     | LAMP2   | 3  | 7.3  | 0     | 34.14 | 1.00 | 0.98 | 1.22 | NaN  | 0.74 | 1.11 | NaN  | NaN  | 1.00 |
| P13489 | Ribonuclease inhibitor                                          | RNH1    | 22 | 64.9 | 0     | 323.3 | 0.91 | 0.86 | 0.92 | 0.92 | 0.91 | 0.93 | 1.14 | 1.14 | 1.14 |
| P13639 | Elongation factor 2                                             | EEF2    | 50 | 69.9 | 0     | 323.3 | 0.79 | 0.78 | 0.82 | 0.88 | 0.84 | 0.85 | 0.84 | 0.89 | 0.90 |
| P13667 | Protein disulfide-isomerase A4                                  | PDIA4   | 37 | 53.2 | 0     | 323.3 | 0.84 | 0.88 | 0.83 | 0.96 | 0.95 | 0.84 | 0.85 | 0.96 | 0.91 |
| P13674 | Prolyl 4-hydroxylase subunit alpha-1                            | P4HA1   | 13 | 34.1 | 0     | 122.7 | 1.67 | 1.21 | 1.56 | 1.47 | 1.12 | 1.51 | 0.93 | 1.60 | 1.50 |
| P13693 | Translationally-controlled tumor protein                        | TPT1    | 9  | 39   | 0     | 114.2 | 1.13 | 1.34 | 1.17 | 1.32 | 1.22 | 1.30 | 0.94 | 0.95 | 1.01 |

|        |                                                                                        |                                                                         |       |      |      |       |       |      |      |      |      |      |      |      |      |      |
|--------|----------------------------------------------------------------------------------------|-------------------------------------------------------------------------|-------|------|------|-------|-------|------|------|------|------|------|------|------|------|------|
| P13726 | Tissue factor                                                                          | F3                                                                      | 9     | 37.3 | 0    | 323.3 | 1.14  | 1.18 | 0.97 | 1.18 | 1.19 | 1.20 | 1.08 | 1.04 | 0.99 |      |
| P13797 | Plastin-3                                                                              | PLS3                                                                    | 32    | 59.5 | 0    | 231.7 | 1.00  | 0.99 | 1.03 | 0.98 | 0.92 | 0.90 | 0.98 | 1.00 | 0.97 |      |
| P13804 | Electron transfer flavoprotein subunit alpha, mitochondrial                            | ETF A                                                                   | 10    | 43.2 | 0    | 24.17 | 1.07  | NaN  | 1.28 | 0.82 | 1.11 | 1.31 | 1.13 | NaN  | 2.25 |      |
| P13807 | Glycogen [starch] synthase, muscle                                                     | GYS1                                                                    | 1     | 3.3  | 0    | 6.875 | 0.89  | 0.86 | NaN  | NaN  | NaN  | 1.14 | NaN  | NaN  | 1.28 |      |
| P13861 | cAMP-dependent protein kinase type II-alpha regulatory subunit                         | PRKAR2A                                                                 | 8     | 24.5 | 0    | 41.73 | 0.90  | 1.27 | 0.93 | 1.20 | 0.90 | 0.84 | 1.53 | NaN  | 1.40 |      |
| P14174 | Macrophage migration inhibitory factor                                                 | MIF                                                                     | 2     | 26.1 | 0    | 46.08 | 1.34  | 1.27 | 1.29 | 1.19 | 1.11 | 1.34 | 1.34 | 1.16 | 1.18 |      |
| P14324 | Farnesyl pyrophosphate                                                                 | FDPS                                                                    | 6     | 17.4 | 0    | 37.34 | 0.70  | 0.72 | 0.76 | 0.90 | 0.79 | 0.83 | 1.22 | 0.86 | 0.86 |      |
| V9GYG2 | Alcohol dehydrogenase                                                                  | AKR1A1                                                                  | 2     | 18.5 | 0    | 4.092 | 0.64  | 0.66 | NaN  | 0.83 | 0.78 | 0.87 | NaN  | NaN  | NaN  |      |
| P14618 | Pyruvate kinase PKM;Pyruvate kinase                                                    | PKM                                                                     | 5     | 83.8 | 0    | 323.3 | 0.90  | 0.92 | 0.89 | 0.99 | 0.98 | 1.00 | 0.99 | 0.94 | 0.89 |      |
| P14625 | Endoplasmic                                                                            | HSP90B1                                                                 | 53    | 58.8 | 0    | 323.3 | 1.05  | 1.03 | 1.04 | 1.08 | 1.10 | 1.10 | 0.86 | 1.00 | 0.99 |      |
| P14854 | Cytochrome c oxidase subunit                                                           | COX6B1                                                                  | 4     | 58.1 | 0    | 65.81 | 0.97  | 1.01 | 1.08 | 1.14 | 1.12 | 1.02 | 1.57 | 1.70 | 1.08 |      |
| P14866 | Heterogeneous nuclear ribonucleoprotein L                                              | HNRNPL                                                                  | 8     | 49.9 | 0    | 323.3 | 0.94  | 0.91 | 1.03 | 1.06 | 0.97 | 0.99 | 0.82 | 1.00 | 0.95 |      |
| P14868 | Aspartate--tRNA ligase, cytoplasmic                                                    | DARS                                                                    | 27    | 57.5 | 0    | 311   | 1.03  | 1.09 | 0.99 | 1.14 | 0.99 | 1.00 | 1.05 | 0.98 | 0.99 |      |
| P15121 | Aldose reductase                                                                       | AKR1B1                                                                  | 15    | 59.5 | 0    | 123.5 | 0.86  | 0.98 | 0.94 | 0.92 | 0.90 | 1.03 | 0.93 | 0.88 | 0.77 |      |
| P15170 | Eukaryotic peptide chain release factor GTP-binding subunit                            | ERF3A;Eukaryotic peptide chain release factor GTP-binding subunit FRF3R | GSPT1 | 11   | 27.5 | 0     | 22.46 | 1.07 | 0.99 | 0.95 | 0.90 | 1.24 | 1.36 | NaN  | 0.87 | 1.16 |
| P15374 | Ubiquitin carboxyl-terminal hydrolase isozyme L3;Ubiquitin carboxyl-terminal hydrolase | UCHL3                                                                   | 8     | 60.4 | 0    | 99.72 | 0.91  | 1.08 | 0.95 | 0.98 | 0.99 | 0.91 | 0.58 | 1.17 | 0.88 |      |
| P15531 | Nucleoside diphosphate kinase A                                                        | NME1                                                                    | 1     | 70.4 | 0    | 13.27 | 1.11  | 1.00 | 0.96 | 0.99 | 0.94 | 0.95 | 1.05 | 1.01 | 1.07 |      |
| P15586 | N-acetylglucosamine-6-sulfatase                                                        | GNS                                                                     | 6     | 13.4 | 0    | 5.204 | 0.84  | 0.69 | NaN  | 0.66 | NaN  | 0.77 | NaN  | NaN  | 0.69 |      |
| P15880 | 40S ribosomal protein S2                                                               | RPS2                                                                    | 16    | 54.3 | 0    | 130.7 | 0.85  | 0.81 | 0.76 | 0.83 | 0.79 | 0.82 | 0.87 | 0.84 | 0.84 |      |
| P15927 | Replication protein A 32 kDa subunit                                                   | RPA2                                                                    | 5     | 39.6 | 0    | 65.78 | 0.78  | 0.74 | 0.77 | NaN  | 1.01 | 0.83 | 1.10 | NaN  | 0.49 |      |
| P16104 | Histone H2AX;Histone H2A type 1-A                                                      | H2AFX                                                                   | 2     | 38.5 | 0    | 243   | 0.88  | 0.83 | 0.95 | 0.83 | 0.82 | 0.88 | 0.90 | 0.86 | 0.94 |      |
| P16144 | Integrin beta-4                                                                        | ITGB4                                                                   | 12    | 8.8  | 0    | 30.47 | NaN   | 0.56 | 0.58 | NaN  | 0.94 | 0.92 | NaN  | 0.91 | 0.83 |      |
| P16152 | Carbonyl reductase [NADPH] 1                                                           | CBR1                                                                    | 11    | 59.2 | 0    | 290.4 | 0.93  | 0.92 | 0.94 | 0.95 | 0.89 | 0.98 | 1.91 | 1.13 | 0.96 |      |
| P16403 | Histone H1.2                                                                           | HIST1H1C                                                                | 1     | 26.8 | 0    | 14.56 | 1.69  | 1.19 | 1.28 | 1.38 | 1.50 | 1.44 | 1.28 | 1.27 | 1.39 |      |
| P16615 | Sarcoplasmic/endoplasmic reticulum calcium ATPase 2                                    | ATP2A2                                                                  | 27    | 32   | 0    | 177.8 | 0.86  | 0.83 | 0.91 | 1.10 | 0.95 | 0.90 | 1.07 | 1.07 | 0.92 |      |
| P16930 | Fumarylacetoacetase                                                                    | FAH                                                                     | 4     | 14.1 | 0    | 8.331 | NaN   | 0.82 | 0.50 | NaN  | 0.70 | 1.01 | 0.97 | NaN  | NaN  |      |
| P16949 | Stathmin                                                                               | STMN1                                                                   | 11    | 63.1 | 0    | 155.5 | 0.81  | 0.78 | 0.78 | 0.83 | 0.84 | 0.83 | 0.91 | 0.90 | 0.91 |      |
| P17066 | Heat shock 70 kDa protein 6;Putative heat shock 70 kDa protein 7                       | HSPA6                                                                   | 1     | 17.4 | 0    | 58.27 | 1.48  | 1.42 | 1.40 | 1.35 | 1.30 | 1.33 | 1.04 | 1.01 | 0.98 |      |

|        |                                                                                                                             |         |    |      |   |       |      |      |      |      |      |      |      |      |      |
|--------|-----------------------------------------------------------------------------------------------------------------------------|---------|----|------|---|-------|------|------|------|------|------|------|------|------|------|
| P17096 | High mobility group protein HMG-I/HMG-Y                                                                                     | HMGA1   | 5  | 40.2 | 0 | 119.9 | 1.03 | 1.07 | 1.12 | 0.90 | 0.96 | 0.84 | 0.96 | 0.98 | 1.10 |
| P17174 | Aspartate aminotransferase, cytoplasmic                                                                                     | GOT1    | 13 | 42.9 | 0 | 181.3 | 0.82 | 0.88 | 1.04 | 0.90 | 1.07 | 0.84 | 0.95 | 0.97 | 0.95 |
| P17252 | Protein kinase C alpha type                                                                                                 | PRKCA   | 8  | 16.8 | 0 | 25.31 | NaN  | 0.40 | 0.36 | 0.89 | 1.73 | 0.71 | 0.67 | 0.80 | 0.41 |
| P17301 | Integrin alpha-2 cAMP-dependent protein kinase catalytic subunit alpha;cAMP-dependent protein kinase                        | ITGA2   | 9  | 9.9  | 0 | 27.14 | 1.32 | 1.15 | 1.65 | NaN  | 0.69 | 0.91 | NaN  | 1.52 | 0.96 |
| P17612 | catalytic subunit beta                                                                                                      | PRKACA  | 2  | 14   | 0 | 3.949 | 0.90 | 0.88 | 0.97 | NaN  | NaN  | NaN  | NaN  | 0.84 | 1.33 |
| P17655 | Calpain-2 catalytic subunit                                                                                                 | CAPN2   | 29 | 53.3 | 0 | 323.3 | 0.98 | 0.95 | 0.92 | 0.99 | 1.08 | 0.98 | 0.91 | 1.10 | 1.02 |
| P17844 | Probable ATP-dependent RNA helicase DDX5                                                                                    | DDX5    | 16 | 45.6 | 0 | 168.7 | 0.79 | 0.85 | 0.88 | 0.88 | 0.87 | 0.89 | 0.79 | 0.93 | 0.78 |
| P17858 | ATP-dependent 6-phosphofructokinase, liver type                                                                             | PFKL    | 16 | 31.9 | 0 | 182   | 0.90 | 0.86 | 0.97 | 1.01 | 0.88 | 1.02 | 0.88 | 1.01 | 1.10 |
| P17931 | Galectin-3;Galectin                                                                                                         | LGALS3  | 8  | 34   | 0 | 29.68 | 0.73 | 0.84 | 0.87 | 0.94 | 0.87 | 0.92 | 1.17 | 0.88 | 0.98 |
| P17987 | T-complex protein 1 subunit Tyrosine-protein phosphatase non-receptor type 1;Tyrosine-protein phosphatase non-receptor type | TCP1    | 27 | 53.8 | 0 | 323.3 | 1.18 | 1.07 | 1.08 | 1.05 | 1.05 | 1.04 | 0.82 | 0.90 | 0.97 |
| P18031 | 60S ribosomal protein L35a                                                                                                  | PTPN1   | 18 | 55.9 | 0 | 98.77 | 0.73 | 0.93 | 1.61 | 1.18 | 0.96 | 1.04 | 0.83 | 1.77 | 1.00 |
| P18077 | ADP-ribosylation factor 4                                                                                                   | RPL35A  | 6  | 39.1 | 0 | 31.03 | 0.80 | 0.81 | 0.81 | 0.87 | 0.80 | 0.90 | 0.87 | 0.95 | 0.89 |
| P18085 | 60S ribosomal protein L7                                                                                                    | ARF4    | 6  | 64.4 | 0 | 250.5 | 0.92 | 1.05 | 0.95 | 0.90 | 0.96 | 1.03 | 0.77 | 0.77 | 0.83 |
| P18124 | Vinculin                                                                                                                    | RPL7    | 16 | 46.4 | 0 | 323.3 | 0.77 | 0.80 | 0.76 | 0.73 | 0.78 | 0.74 | 0.83 | 0.84 | 0.82 |
| P18206 | Phosphoglycerate mutase 1                                                                                                   | VCL     | 59 | 63.5 | 0 | 323.3 | 1.04 | 1.04 | 1.07 | 1.05 | 1.05 | 1.01 | 1.08 | 1.00 | 1.10 |
| P18669 | Regulator of chromosome condensation                                                                                        | PGAM1   | 17 | 70.9 | 0 | 323.3 | 1.08 | 0.98 | 1.06 | 1.08 | 1.09 | 1.06 | 1.03 | 0.95 | 1.04 |
| P18754 | Syndecan-1                                                                                                                  | RCC1    | 6  | 21.9 | 0 | 20.91 | 0.99 | 0.80 | 0.73 | 0.80 | 0.52 | 0.79 | NaN  | 0.68 | 0.81 |
| P18827 | ATP synthase-coupling factor 6, mitochondrial                                                                               | SDC1    | 2  | 10.3 | 0 | 3.499 | 0.81 | NaN  | 0.64 | NaN  | 0.53 | NaN  | NaN  | 1.33 | 1.21 |
| P18859 | Nucleolin                                                                                                                   | ATP5J   | 3  | 44.4 | 0 | 168.7 | 1.35 | 1.00 | 1.23 | 1.11 | 1.26 | 1.12 | 1.35 | 1.25 | NaN  |
| P19338 | Hexokinase-1                                                                                                                | NCL     | 33 | 40   | 0 | 323.3 | 0.96 | 0.96 | 0.94 | 1.00 | 0.96 | 0.97 | 0.87 | 0.82 | 0.84 |
| P19367 | Interferon-induced, double-stranded RNA-activated protein kinase                                                            | HK1     | 24 | 34.8 | 0 | 92.56 | 1.08 | NaN  | 1.21 | 0.98 | 1.23 | 0.99 | 1.03 | 1.01 | 0.97 |
| P19525 | Spermidine synthase                                                                                                         | EIF2AK2 | 5  | 10   | 0 | 4.583 | NaN  | 1.43 | NaN  | NaN  | 1.11 | 0.99 | NaN  | NaN  | 0.86 |
| P19623 | Eukaryotic translation initiation factor 2 subunit 2                                                                        | SRM     | 9  | 50.3 | 0 | 59.04 | 0.76 | 0.96 | 0.95 | 0.90 | 0.74 | 0.77 | 0.81 | 0.86 | 0.98 |
| P20042 | Annexin A7                                                                                                                  | EIF2S2  | 16 | 44.4 | 0 | 166.9 | 1.13 | 1.09 | 0.97 | 0.96 | 1.06 | 1.00 | 1.10 | 0.84 | 0.91 |
| P20073 | Transcription factor BTF3                                                                                                   | ANXA7   | 12 | 26.6 | 0 | 20.76 | 0.95 | 1.05 | 0.96 | 1.09 | 1.01 | 0.82 | 1.35 | 1.39 | 1.00 |
| P20290 | Ras-related protein Rab-5A                                                                                                  | BTF3    | 9  | 60.2 | 0 | 200.3 | 0.89 | 0.73 | 0.88 | 0.97 | 1.17 | 0.87 | 1.21 | 1.01 | 0.83 |
| P20339 | Ras-related protein Rab-6A                                                                                                  | RAB5A   | 4  | 39.5 | 0 | 26.2  | 1.03 | 1.13 | 1.23 | 1.24 | 1.35 | 1.13 | 0.70 | 1.54 | 0.94 |
| P20340 | Proteasome subunit beta type-1                                                                                              | RAB6A   | 7  | 37   | 0 | 36.49 | 0.69 | 0.79 | 0.87 | 1.10 | 1.03 | 0.85 | 0.96 | 0.76 | 0.99 |
| P20618 | Lamin-B1                                                                                                                    | PSMB1   | 9  | 45.6 | 0 | 178.3 | 0.87 | 0.80 | 0.94 | 0.79 | 0.97 | 1.01 | 1.38 | 0.70 | 0.95 |
| P20700 | Parathyromosin                                                                                                              | LMNB1   | 24 | 52.7 | 0 | 323.3 | 0.98 | 0.86 | 1.12 | 0.90 | 0.99 | 0.90 | 0.97 | 0.89 | 1.04 |
| P20962 | Glutathione S-transferase Mu 3                                                                                              | PTMS    | 2  | 11.8 | 0 | 88.24 | 1.07 | 1.18 | 1.12 | 1.04 | 1.23 | 1.01 | NaN  | NaN  | 1.08 |
| P21266 |                                                                                                                             | GSTM3   | 14 | 65.3 | 0 | 56.38 | 1.09 | 1.02 | 0.96 | 0.96 | 0.94 | 0.90 | 1.02 | 1.18 | 0.95 |

|        |                                                                                                                                                                                    |          |     |      |   |       |      |      |      |      |      |      |      |      |      |
|--------|------------------------------------------------------------------------------------------------------------------------------------------------------------------------------------|----------|-----|------|---|-------|------|------|------|------|------|------|------|------|------|
| P21281 | V-type proton ATPase subunit B, brain isoform                                                                                                                                      | ATP6V1B2 | 6   | 17.6 | 0 | 11.61 | NaN  | NaN  | NaN  | NaN  | 1.39 | 0.74 | NaN  | NaN  | NaN  |
| P21283 | V-type proton ATPase subunit C                                                                                                                                                     | ATP6V1C1 | 3   | 9.2  | 0 | 4.809 | 0.84 | 1.90 | 1.18 | NaN  | NaN  | 1.34 | 1.10 | NaN  | 1.11 |
| P21291 | Cysteine and glycine-rich protein                                                                                                                                                  | CSRP1    | 7   | 59.6 | 0 | 294.3 | 0.95 | 0.85 | 0.90 | 1.00 | 0.99 | 1.06 | 0.83 | 1.18 | 0.89 |
| P21333 | Filamin-A                                                                                                                                                                          | FLNA     | 112 | 62.6 | 0 | 323.3 | 1.06 | 1.02 | 1.06 | 0.99 | 0.99 | 0.97 | 1.04 | 1.00 | 1.05 |
| P21399 | Cytoplasmic aconitate hydratase                                                                                                                                                    | ACO1     | 16  | 27.1 | 0 | 76.11 | 0.83 | 0.70 | 0.79 | 0.77 | 0.61 | 0.79 | 0.76 | 0.99 | 1.00 |
| P21589 | 5-nucleotidase                                                                                                                                                                     | NT5E     | 21  | 40.4 | 0 | 323.3 | 1.14 | 1.18 | 1.16 | 1.18 | 1.04 | 1.25 | 1.13 | 1.00 | 0.95 |
| P21796 | Voltage-dependent anion-selective channel protein 1                                                                                                                                | VDAC1    | 18  | 83.4 | 0 | 323.3 | 1.03 | 1.01 | 1.02 | 1.03 | 0.99 | 1.08 | 1.06 | 0.95 | 1.00 |
| P21964 | Catechol O-methyltransferase                                                                                                                                                       | COMT     | 9   | 49.1 | 0 | 23.85 | 1.01 | 0.73 | 0.95 | NaN  | NaN  | 1.22 | NaN  | 1.11 | 1.08 |
| P21980 | Protein-glutamine gamma-glutamyltransferase 2                                                                                                                                      | TGM2     | 32  | 53.6 | 0 | 323.3 | 1.14 | 1.21 | 1.19 | 1.16 | 1.13 | 1.15 | 1.30 | 1.29 | 1.31 |
| P22087 | rRNA 2-O-methyltransferase fibrillar protein                                                                                                                                       | FBL      | 4   | 44.9 | 0 | 14.99 | 0.57 | 0.99 | 0.90 | 0.78 | 0.85 | 0.93 | 0.65 | 0.75 | 0.61 |
| P22102 | irifunctional purine biosynthetic protein adenosine-3;Phosphoribosylamine--glycine ligase;Phosphoribosylformylglycinamide cyclo-ligase;Phosphoribosylglycinamide formyltransferase | GART     | 22  | 40.1 | 0 | 303.3 | 1.01 | 0.91 | 0.89 | 0.82 | 0.90 | 0.86 | 0.82 | 0.78 | 0.97 |
| P22234 | Multifunctional protein ADE2;Phosphoribosylaminoimidazole-succinocarboxamide synthase;Phosphoribosylaminoimidazole carboxylase                                                     | PAICS    | 19  | 51.5 | 0 | 177.3 | 0.83 | 0.89 | 0.81 | 0.94 | 0.95 | 0.98 | 0.90 | 1.04 | 0.94 |
| P22307 | Non-specific lipid-transfer protein                                                                                                                                                | SCP2     | 15  | 24.9 | 0 | 39.27 | 0.76 | 0.70 | 0.78 | 0.94 | 0.90 | 0.94 | 0.71 | 0.70 | 0.75 |
| P22314 | Ubiquitin-like modifier-activating enzyme 1                                                                                                                                        | UBA1     | 43  | 54.2 | 0 | 323.3 | 1.02 | 1.02 | 1.05 | 0.94 | 0.97 | 0.96 | 1.13 | 1.07 | 1.15 |
| P22413 | Ectonucleotide pyrophosphatase/phosphodiesterase family member 1;Alkaline phosphodiesterase I;Nucleotide pyrophosphatase                                                           | ENPP1    | 4   | 6.7  | 0 | 4.262 | NaN  | NaN  | 1.18 | NaN  | 1.10 | 0.73 | NaN  | NaN  | NaN  |
| P22626 | Heterogeneous nuclear ribonucleoproteins A2/B1                                                                                                                                     | HNRNPA2I | 23  | 69.1 | 0 | 323.3 | 0.92 | 0.91 | 0.91 | 0.91 | 0.92 | 0.94 | 0.79 | 0.92 | 0.94 |
| P22695 | Cytochrome b-c1 complex subunit 2, mitochondrial                                                                                                                                   | UQCRC2   | 8   | 32.9 | 0 | 79.28 | 1.30 | 1.13 | 1.22 | 0.99 | 1.02 | 0.95 | 0.99 | 0.81 | 0.97 |
| P23229 | Integrin alpha-6;Integrin alpha-6 heavy chain;Integrin alpha-6 light chain;Processed integrin alpha-6                                                                              | ITGA6    | 10  | 12.4 | 0 | 162.4 | 0.73 | 0.83 | 0.93 | 0.73 | NaN  | 0.83 | 0.56 | NaN  | 1.54 |
| P23246 | Splicing factor, proline- and glutamine-rich                                                                                                                                       | SFPQ     | 23  | 38   | 0 | 206.4 | 1.15 | 1.19 | 1.08 | 1.13 | 1.15 | 1.09 | 1.17 | 1.12 | 0.88 |
| P23284 | Peptidyl-prolyl cis-trans isomerase B                                                                                                                                              | PPIB     | 14  | 61.1 | 0 | 232.1 | 1.13 | 1.11 | 1.04 | 0.99 | 1.01 | 1.06 | 0.93 | 1.01 | 0.99 |
| P23381 | Tryptophan--tRNA ligase, cytoplasmic;T1-TrpRS;T2-TrpRS                                                                                                                             | WARS     | 9   | 27.2 | 0 | 86.23 | 0.96 | 0.80 | 0.97 | 0.69 | 0.73 | 0.94 | 0.97 | 0.94 | 0.95 |

|        |                                                                                       |        |    |      |   |       |      |      |      |      |      |      |      |      |      |
|--------|---------------------------------------------------------------------------------------|--------|----|------|---|-------|------|------|------|------|------|------|------|------|------|
| P23396 | 40S ribosomal protein S3                                                              | RPS3   | 18 | 79.8 | 0 | 146.8 | 0.85 | 0.86 | 0.86 | 0.87 | 0.86 | 0.91 | 0.88 | 0.94 | 0.90 |
| P23526 | Adenosylhomocysteinase                                                                | AHCY   | 20 | 46.3 | 0 | 323.3 | 0.87 | 0.85 | 0.87 | 0.86 | 0.90 | 0.80 | 0.91 | 0.82 | 0.76 |
| P23528 | Cofilin-1                                                                             | CFL1   | 16 | 89.8 | 0 | 323.3 | 0.93 | 0.91 | 0.88 | 0.93 | 0.95 | 1.02 | 1.00 | 0.97 | 0.90 |
| P23634 | Plasma membrane calcium-transporting ATPase 4                                         | ATP2B4 | 2  | 7.4  | 0 | 15.08 | NaN  | 0.67 | 1.06 | 0.99 | 0.52 | 0.71 | 0.88 | NaN  | NaN  |
| P23919 | Thymidylate kinase                                                                    | DTYMK  | 9  | 38.2 | 0 | 9.826 | 0.97 | 1.05 | 1.25 | 0.91 | 1.39 | 0.96 | 1.23 | 1.26 | 1.11 |
| P24534 | Elongation factor 1-beta                                                              | EEF1B2 | 8  | 47.6 | 0 | 323.3 | 1.01 | 1.01 | 0.91 | 1.03 | 1.15 | 1.05 | 0.92 | 0.95 | 1.03 |
| Q5QNZ2 | ATP synthase F(0) complex subunit B1, mitochondrial Low molecular weight              | ATP5F1 | 6  | 27.7 | 0 | 127.3 | 1.18 | 1.06 | 1.02 | 0.99 | 1.19 | 1.46 | 1.59 | 0.74 | 0.99 |
| P24666 | phosphotyrosine protein phosphatase                                                   | ACP1   | 4  | 41.1 | 0 | 6.582 | 0.78 | NaN  | 0.60 | NaN  | NaN  | NaN  | NaN  | NaN  | NaN  |
| P24752 | Acetyl-CoA acetyltransferase, mitochondrial                                           | ACAT1  | 18 | 55.3 | 0 | 264.1 | 0.83 | 0.80 | 0.94 | 0.87 | 0.94 | 1.10 | 0.80 | 0.75 | 0.93 |
| P24844 | Myosin regulatory light polypeptide 9                                                 | MYL9   | 3  | 66.3 | 0 | 19.32 | 1.28 | 1.06 | 1.14 | 1.05 | 0.90 | 1.08 | 1.13 | 1.29 | 1.16 |
| P25205 | DNA replication licensing factor MCM3                                                 | MCM3   | 11 | 15   | 0 | 17.6  | 0.89 | 0.78 | 0.54 | 0.82 | 0.68 | 0.85 | 0.72 | 0.73 | 0.73 |
| P25398 | 40S ribosomal protein S12                                                             | RPS12  | 8  | 71.2 | 0 | 262.6 | 0.95 | 1.01 | 0.99 | 0.89 | 0.97 | 1.01 | 1.01 | 1.06 | 1.00 |
| P25685 | DnaJ homolog subfamily B member 1                                                     | DNAJB1 | 11 | 36.5 | 0 | 106.8 | 1.71 | 1.55 | 1.84 | 1.50 | 1.82 | 1.43 | 1.45 | 1.03 | 1.02 |
| P25705 | ATP synthase subunit alpha, mitochondrial                                             | ATP5A1 | 29 | 61.7 | 0 | 323.3 | 1.06 | 1.06 | 1.09 | 0.97 | 0.93 | 0.97 | 0.95 | 0.93 | 0.93 |
| P25786 | Proteasome subunit alpha type-1                                                       | PSMA1  | 17 | 75.3 | 0 | 153.5 | 1.03 | 0.98 | 1.01 | 0.96 | 1.04 | 0.99 | 1.11 | 1.09 | 1.03 |
| P25788 | Proteasome subunit alpha type-3                                                       | PSMA3  | 11 | 42.7 | 0 | 63.51 | 1.13 | 1.11 | 1.08 | 0.91 | 1.06 | 1.00 | 0.93 | 0.77 | 1.06 |
| P25789 | Proteasome subunit alpha type-4;Proteasome subunit alpha type;Proteasome subunit beta | PSMA4  | 13 | 58.2 | 0 | 306.2 | 1.08 | 1.02 | 1.12 | 1.05 | 0.97 | 1.02 | 0.91 | 0.95 | 0.95 |
| P26006 | Integrin alpha-3;Integrin alpha-3 heavy chain;Integrin alpha-3 light chain            | ITGA3  | 18 | 19   | 0 | 174.2 | 0.85 | 1.00 | 0.95 | 0.99 | 0.95 | 0.95 | 0.89 | 0.97 | 0.93 |
| P26038 | Moesin                                                                                | MSN    | 44 | 76.8 | 0 | 323.3 | 0.95 | 0.95 | 0.97 | 0.99 | 1.01 | 1.01 | 0.94 | 0.92 | 0.90 |
| P26196 | Probable ATP-dependent RNA helicase DDX6                                              | DDX6   | 7  | 25.5 | 0 | 100.3 | 1.05 | 0.99 | 0.99 | 1.20 | 1.06 | 0.89 | 0.72 | 0.79 | 0.83 |
| P26368 | Splicing factor U2AF 65 kDa subunit                                                   | U2AF2  | 12 | 42.5 | 0 | 79.94 | 0.93 | 0.93 | 0.80 | 0.96 | 1.09 | 0.89 | 1.10 | 0.98 | 0.92 |
| P26373 | 60S ribosomal protein L13                                                             | RPL13  | 9  | 35.5 | 0 | 150.9 | 0.98 | 0.94 | 0.95 | 0.96 | 0.96 | 0.98 | 1.04 | 0.97 | 1.00 |
| P26447 | Protein S100-A4                                                                       | S100A4 | 5  | 36.6 | 0 | 96.57 | 0.76 | 0.93 | 0.86 | 0.83 | 0.84 | 0.87 | 0.80 | 0.86 | 0.81 |
| P26583 | High mobility group protein B2                                                        | HMGB2  | 9  | 28.7 | 0 | 50.5  | 0.93 | 1.09 | 0.82 | 0.81 | 1.09 | 0.74 | 0.72 | 0.76 | 0.67 |
| P26639 | Threonine--tRNA ligase, cytoplasmic                                                   | TARS   | 32 | 49.8 | 0 | 323.3 | 1.05 | 1.02 | 1.08 | 0.99 | 1.11 | 0.97 | 1.03 | 0.94 | 0.89 |
| P26640 | Valine--tRNA ligase                                                                   | VARS   | 20 | 21.8 | 0 | 86.93 | 0.88 | 0.89 | 0.96 | 0.92 | 0.84 | 0.83 | 1.01 | 0.94 | 0.89 |
| P26641 | Elongation factor 1-gamma                                                             | EEF1G  | 27 | 61.1 | 0 | 323.3 | 1.03 | 1.07 | 1.05 | 1.01 | 1.00 | 1.03 | 0.96 | 0.94 | 0.93 |
| P27144 | Adenylate kinase 4,                                                                   | AK4    | 5  | 25.1 | 0 | 13.66 | 1.30 | 1.10 | 1.32 | 1.38 | 1.41 | 1.60 | 1.29 | 1.31 | 1.11 |
| P27348 | 14-3-3 protein theta                                                                  | YWHAQ  | 14 | 59.2 | 0 | 323.3 | 1.02 | 1.02 | 1.00 | 0.96 | 1.02 | 1.00 | 0.91 | 0.97 | 1.00 |
| X1WI28 | 60S ribosomal protein L10                                                             | RPL10  | 3  | 49.5 | 0 | 233.6 | 0.67 | 0.80 | 0.70 | 0.79 | 0.78 | 0.82 | 0.73 | 0.69 | 0.65 |



|        |                                                                                                                                                                                                                |        |    |      |       |       |      |      |      |      |      |      |      |      |      |
|--------|----------------------------------------------------------------------------------------------------------------------------------------------------------------------------------------------------------------|--------|----|------|-------|-------|------|------|------|------|------|------|------|------|------|
| P27658 | Collagen alpha-1(VIII) chain;Vastatin                                                                                                                                                                          | COL8A1 | 1  | 1.3  | 0.001 | 2.085 | 0.95 | 1.10 | 1.13 | 1.83 | 1.44 | 1.39 | NaN  | NaN  | NaN  |
| P27694 | Replication protein A 70 kDa DNA-binding subunit;Replication protein A 70 kDa DNA-binding subunit. N-terminally processed DNA-(apurinic or apyrimidinic site) lyase;DNA-(apurinic or apyrimidinic site) lyase, | RPA1   | 9  | 21.8 | 0     | 15.03 | 0.88 | 0.59 | 0.66 | 1.02 | 0.88 | 0.75 | 0.81 | 1.01 | NaN  |
| P27695 | mitochondrial                                                                                                                                                                                                  | APEX1  | 11 | 44.7 | 0     | 87.77 | 1.01 | 0.88 | 0.89 | 0.93 | 0.99 | 0.99 | 0.89 | 0.92 | 0.97 |
| P27701 | CD82 antigen;Tetraspanin                                                                                                                                                                                       | CD82   | 2  | 9.7  | 0     | 3.613 | 0.79 | NaN  | 1.32 | NaN  | NaN  | NaN  | 1.80 | 1.08 | NaN  |
| P27797 | Calreticulin                                                                                                                                                                                                   | CALR   | 28 | 71.5 | 0     | 323.3 | 1.07 | 1.03 | 1.07 | 1.04 | 1.09 | 1.06 | 1.09 | 1.14 | 1.09 |
| P27816 | Microtubule-associated protein 4;Microtubule-associated protein                                                                                                                                                | MAP4   | 39 | 49   | 0     | 323.3 | 0.82 | 0.85 | 0.90 | 0.89 | 0.95 | 0.97 | 0.91 | 0.90 | 1.06 |
| P27824 | Calnexin                                                                                                                                                                                                       | CANX   | 27 | 45.6 | 0     | 323.3 | 1.04 | 1.05 | 1.04 | 1.02 | 1.04 | 1.06 | 1.04 | 0.93 | 1.10 |
| P28066 | Proteasome subunit alpha type-5                                                                                                                                                                                | PSMA5  | 12 | 57.3 | 0     | 130.1 | 0.93 | 0.81 | 0.88 | 0.99 | 0.81 | 1.01 | 1.13 | 0.86 | 0.76 |
| P28070 | Proteasome subunit beta type-4                                                                                                                                                                                 | PSMB4  | 8  | 48.5 | 0     | 132.8 | 0.97 | 1.08 | 1.12 | 1.02 | 0.96 | 1.11 | 0.90 | 1.03 | 1.11 |
| P28072 | Proteasome subunit beta type-6                                                                                                                                                                                 | PSMB6  | 4  | 16.7 | 0     | 15.63 | 1.18 | 1.22 | 1.20 | 1.22 | 1.10 | 1.01 | 1.14 | 1.28 | 1.05 |
| P28074 | Proteasome subunit beta type-5                                                                                                                                                                                 | PSMB5  | 7  | 36.5 | 0     | 25.96 | 0.79 | 0.88 | 1.04 | 0.79 | 0.97 | 0.96 | 0.62 | 0.80 | 1.09 |
| P28288 | ATP-binding cassette sub-family D member 3                                                                                                                                                                     | ABCD3  | 5  | 10.3 | 0     | 8.774 | 1.26 | 1.15 | 1.19 | 0.84 | 1.01 | 1.17 | 1.03 | 0.84 | 1.23 |
| P28482 | Mitogen-activated protein kinase                                                                                                                                                                               | MAPK1  | 8  | 38.9 | 0     | 80.56 | 0.99 | 0.84 | 0.82 | 1.11 | 1.05 | 0.89 | 1.20 | 1.13 | 1.09 |
| P28838 | Cytosol aminopeptidase                                                                                                                                                                                         | LAP3   | 16 | 45.1 | 0     | 62.52 | 0.96 | 0.84 | 0.87 | NaN  | 0.71 | 1.09 | 1.22 | 0.63 | 0.98 |
| P29317 | Ephrin type-A receptor 2                                                                                                                                                                                       | EPHA2  | 8  | 11.3 | 0     | 23.66 | 1.35 | 1.37 | 1.47 | 1.29 | 1.04 | 1.20 | NaN  | 1.10 | 1.10 |
| P29353 | SHC-transforming protein 1                                                                                                                                                                                     | SHC1   | 2  | 4.6  | 0     | 3.337 | 0.95 | 1.01 | NaN  | NaN  | NaN  | 1.35 | NaN  | NaN  | NaN  |
| P29401 | Transketolase                                                                                                                                                                                                  | TKT    | 35 | 68.2 | 0     | 323.3 | 1.01 | 1.01 | 1.02 | 1.03 | 1.09 | 1.02 | 0.89 | 0.89 | 0.92 |
| P29966 | Myristoylated alanine-rich C-kinase substrate                                                                                                                                                                  | MARCKS | 10 | 50.3 | 0     | 323.3 | 0.77 | 0.69 | 0.68 | 0.71 | 0.68 | 0.79 | 1.20 | 1.23 | 1.19 |
| P29992 | Guanine nucleotide-binding protein subunit alpha-11;Guanine nucleotide-binding protein subunit alpha-14;Guanine nucleotide-binding protein G(n)                                                                | GNA11  | 2  | 7.2  | 0     | 5.236 | 0.94 | 0.58 | 0.84 | NaN  | 0.91 | 1.16 | NaN  | NaN  | 0.93 |
| P30040 | Endoplasmic reticulum resident protein 29                                                                                                                                                                      | ERP29  | 5  | 21.8 | 0     | 34.05 | 0.96 | 1.04 | 1.02 | 0.91 | 1.04 | 1.05 | 1.08 | 1.00 | 0.97 |
| P30041 | Peroxiredoxin-6                                                                                                                                                                                                | PRDX6  | 18 | 66.1 | 0     | 323.3 | 1.01 | 0.95 | 1.08 | 1.08 | 1.01 | 1.02 | 1.07 | 1.04 | 0.91 |
| P30044 | Peroxiredoxin-5, mitochondrial                                                                                                                                                                                 | PRDX5  | 9  | 55.1 | 0     | 50.49 | 0.92 | 1.01 | 1.02 | 0.89 | 1.10 | 1.07 | 1.33 | 1.49 | 1.41 |
| P30048 | Thioredoxin-dependent peroxide reductase, mitochondrial                                                                                                                                                        | PRDX3  | 9  | 43.4 | 0     | 181.4 | 0.91 | 0.86 | 0.92 | 1.05 | 1.09 | 1.04 | 1.09 | 0.90 | 0.90 |
| P30049 | ATP synthase subunit delta, mitochondrial                                                                                                                                                                      | ATP5D  | 2  | 13.7 | 0     | 6.676 | NaN  | NaN  | NaN  | 0.99 | NaN  | NaN  | 0.93 | 0.76 | NaN  |
| P30050 | 60S ribosomal protein L12                                                                                                                                                                                      | RPL12  | 8  | 63   | 0     | 299   | 0.77 | 0.76 | 0.77 | 0.73 | 0.75 | 0.82 | 0.88 | 0.88 | 0.86 |
| P30084 | Enoyl-CoA hydratase, mitochondrial                                                                                                                                                                             | ECHS1  | 8  | 36.6 | 0     | 104.3 | 1.00 | 0.87 | 1.17 | 1.09 | 1.03 | 1.10 | 1.13 | 0.99 | 0.99 |
| P30085 | UMP-CMP kinase                                                                                                                                                                                                 | CMPK1  | 7  | 47.4 | 0     | 36.19 | 0.95 | 1.05 | 1.07 | 0.95 | 0.88 | 1.04 | 1.12 | 1.04 | 1.15 |

|        |                                                                                                                                                                                                     |          |    |      |   |       |      |      |      |      |      |      |      |      |      |
|--------|-----------------------------------------------------------------------------------------------------------------------------------------------------------------------------------------------------|----------|----|------|---|-------|------|------|------|------|------|------|------|------|------|
| P30086 | Phosphatidylethanolamine-binding protein 1;Hippocampal cholinergic neurostimulating                                                                                                                 | PEBP1    | 11 | 79.7 | 0 | 323.3 | 0.98 | 1.01 | 0.96 | 0.98 | 1.02 | 1.10 | 0.98 | 1.04 | 0.98 |
| P30101 | Protein disulfide-isomerase A3 Serine/threonine-protein                                                                                                                                             | PDIA3    | 29 | 68.3 | 0 | 323.3 | 1.02 | 0.99 | 1.00 | 0.99 | 1.05 | 1.06 | 0.93 | 1.07 | 0.96 |
| P30153 | phosphatase 2A 65 kDa regulatory subunit A alpha                                                                                                                                                    | PPP2R1A  | 25 | 54.5 | 0 | 323.3 | 1.14 | 1.16 | 1.20 | 1.29 | 1.23 | 1.23 | 0.96 | 1.06 | 0.89 |
| P30405 | Peptidyl-prolyl cis-trans isomerase F, mitochondrial:Peptidyl-prolyl cis-Glycylpeptide N-                                                                                                           | PPIF     | 5  | 49.8 | 0 | 45.81 | 0.78 | 0.72 | NaN  | 1.41 | NaN  | 1.38 | NaN  | NaN  | NaN  |
| P30419 | tetradecanoyltransferase 1 HLA class I histocompatibility                                                                                                                                           | NMT1     | 9  | 20.8 | 0 | 284.4 | 0.88 | 0.81 | 0.86 | 0.87 | 1.02 | 0.88 | 0.63 | 0.60 | 0.82 |
| P30479 | antigen, B-41 alpha chain;HLA class I histocompatibility antigen, B-42 alpha chain;HLA class I histocompatibility antigen, B-8 alpha chain;HLA class I histocompatibility antigen, B-18 alpha chain | HLA-B    | 1  | 37.3 | 0 | 246   | 1.07 | 1.02 | 1.03 | 1.14 | 1.15 | 1.13 | 1.02 | 1.10 | 1.04 |
| P30520 | Adenylosuccinate synthetase isozyme 2                                                                                                                                                               | ADSS     | 12 | 37.3 | 0 | 60.86 | 0.81 | 0.84 | 0.87 | 0.99 | 0.94 | 1.04 | 1.09 | 0.87 | 0.91 |
| P30740 | Leukocyte elastase inhibitor                                                                                                                                                                        | SERPINB1 | 15 | 51.2 | 0 | 70.14 | 0.81 | 0.85 | 0.86 | 1.01 | 0.88 | 0.92 | 0.82 | 0.94 | 0.83 |
| P30825 | High affinity cationic amino acid transporter 1                                                                                                                                                     | SLC7A1   | 1  | 3    | 0 | 4.961 | 1.07 | 0.93 | 1.22 | NaN  | NaN  | 0.88 | NaN  | NaN  | 0.89 |
| P30837 | Aldehyde dehydrogenase X, mitochondrial                                                                                                                                                             | ALDH1B1  | 8  | 23.4 | 0 | 16.85 | 0.86 | 0.92 | 0.73 | 0.81 | 0.81 | 0.88 | 0.71 | 0.86 | 0.95 |
| P31150 | Rab GDP dissociation inhibitor alpha                                                                                                                                                                | GDI1     | 12 | 60.4 | 0 | 190.1 | 0.86 | 0.76 | 0.70 | 1.40 | 1.01 | 1.07 | 0.80 | 1.65 | 0.94 |
| P31153 | S-adenosylmethionine synthase isoform type-2                                                                                                                                                        | MAT2A    | 8  | 22.8 | 0 | 27.98 | 1.23 | 0.88 | 1.05 | 1.20 | 0.93 | 0.97 | 0.91 | 1.20 | 0.94 |
| P31689 | DnaJ homolog subfamily A member 1                                                                                                                                                                   | DNAJA1   | 9  | 39.8 | 0 | 43.53 | 1.87 | 1.98 | 1.94 | 1.59 | 1.50 | 1.56 | 0.81 | 0.72 | 0.93 |
| P31930 | Cytochrome b-c1 complex subunit 1, mitochondrial                                                                                                                                                    | UQCRC1   | 10 | 34.8 | 0 | 29.99 | 1.21 | 1.06 | 1.22 | 1.14 | 0.94 | 1.20 | NaN  | 1.41 | 0.99 |
| P31937 | 3-hydroxyisobutyrate dehydrogenase, mitochondrial                                                                                                                                                   | HIBADH   | 8  | 40.5 | 0 | 48.33 | 0.95 | 0.70 | 0.82 | NaN  | 0.96 | 1.09 | 1.11 | NaN  | 0.57 |
| P31939 | Bifunctional purine biosynthesis protein                                                                                                                                                            | ATIC     | 21 | 50.3 | 0 | 210   | 0.88 | 0.80 | 0.85 | 0.81 | 0.95 | 0.81 | 0.76 | 0.76 | 0.86 |
| P31942 | PURH;Phosphoribosylaminoimidazolecarboxamide formyltransferase;IMP cyclohydrolase Heterogeneous nuclear ribonucleoprotein H3                                                                        | HNRNPH3  | 7  | 34.7 | 0 | 233.9 | 0.85 | 0.77 | 0.87 | 0.85 | 0.88 | 0.91 | 0.95 | 0.97 | 1.07 |

|        |                                                                                |          |     |      |   |       |      |      |      |      |      |      |      |      |      |
|--------|--------------------------------------------------------------------------------|----------|-----|------|---|-------|------|------|------|------|------|------|------|------|------|
| P31946 | 14-3-3 protein beta/alpha;14-3-3 protein beta/alpha, N-terminally processed    | YWHAB    | 9   | 52.8 | 0 | 323.3 | 0.97 | 0.95 | 0.97 | 1.00 | 0.91 | 0.97 | 1.01 | 0.99 | 1.00 |
| P31947 | 14-3-3 protein sigma                                                           | SFN      | 11  | 61.3 | 0 | 323.3 | 0.91 | 0.88 | 0.90 | 0.92 | 0.96 | 0.98 | 0.95 | 0.98 | 1.11 |
| P31948 | Stress-induced-phosphoprotein 1                                                | STIP1    | 44  | 65   | 0 | 323.3 | 1.08 | 1.12 | 1.18 | 1.29 | 1.32 | 1.16 | 0.86 | 0.92 | 0.90 |
| P31949 | Protein S100-A11;Protein S100-A11, N-terminally processed                      | S100A11  | 6   | 52.4 | 0 | 283.2 | 1.02 | 0.95 | 1.01 | 0.92 | 1.01 | 0.91 | 0.92 | 0.96 | 1.06 |
| P32119 | Peroxiredoxin-2                                                                | PRDX2    | 12  | 60.6 | 0 | 182.6 | 0.97 | 1.00 | 1.01 | 0.94 | 1.02 | 0.93 | 1.01 | 0.96 | 1.07 |
| P32320 | Cytidine deaminase                                                             | CDA      | 4   | 45.2 | 0 | 123   | 0.97 | 0.85 | 0.67 | 1.06 | 1.13 | 1.10 | 1.77 | 1.60 | 1.14 |
| P32321 | Deoxycytidylate deaminase                                                      | DCTD     | 2   | 18.5 | 0 | 4.252 | NaN  | NaN  | 1.30 | NaN  | 1.33 | 0.71 | NaN  | NaN  | 0.77 |
| P32969 | 60S ribosomal protein L9                                                       | RPL9     | 8   | 65.1 | 0 | 323.3 | 0.79 | 0.71 | 0.79 | 0.69 | 0.73 | 0.68 | 0.80 | 0.73 | 0.87 |
| P33176 | Kinesin-1 heavy chain                                                          | KIF5B    | 38  | 49.1 | 0 | 323.3 | 0.89 | 0.94 | 0.72 | 0.95 | 0.87 | 0.85 | 0.92 | 0.85 | 0.81 |
| P33993 | DNA replication licensing factor MCM7                                          | MCM7     | 15  | 28.1 | 0 | 47.29 | 0.90 | 0.54 | 0.69 | 0.96 | 0.96 | 0.74 | NaN  | NaN  | 0.94 |
| P34897 | Serine hydroxymethyltransferase, mitochondrial;Serine hydroxymethyltransferase | SHMT2    | 15  | 42.5 | 0 | 152.3 | 0.80 | 0.66 | 0.74 | 0.87 | 0.85 | 0.88 | NaN  | 0.87 | 1.00 |
| P34932 | Heat shock 70 kDa protein 4                                                    | HSPA4    | 39  | 56.7 | 0 | 323.3 | 1.10 | 1.17 | 1.11 | 1.20 | 1.15 | 1.07 | 1.02 | 0.94 | 0.96 |
| P35221 | Catenin alpha-1                                                                | CTNNA1   | 13  | 23.5 | 0 | 23.62 | 1.46 | 1.53 | 1.25 | 0.64 | 0.83 | 0.75 | NaN  | NaN  | NaN  |
| P35232 | Prohibitin                                                                     | PHB      | 16  | 72.8 | 0 | 189.3 | 1.12 | 0.97 | 1.09 | 1.04 | 1.02 | 1.09 | 1.11 | 0.96 | 1.12 |
| P35268 | 60S ribosomal protein L22                                                      | RPL22    | 4   | 39.8 | 0 | 231.1 | 0.93 | 0.78 | 0.81 | 0.74 | 0.66 | 0.98 | 0.98 | 0.70 | 0.65 |
| P35269 | General transcription factor IIF subunit 1                                     | GTF2F1   | 5   | 13.5 | 0 | 22.42 | 0.76 | 1.18 | 0.95 | 0.71 | 1.01 | 0.97 | NaN  | 1.21 | 0.98 |
| P35270 | Sepiapterin reductase                                                          | SPR      | 10  | 51   | 0 | 88.06 | 0.84 | 0.96 | 0.97 | 1.10 | 1.09 | 0.94 | 0.92 | 0.88 | 1.06 |
| P35579 | Myosin-9                                                                       | MYH9     | 147 | 69.3 | 0 | 323.3 | 0.90 | 0.94 | 0.91 | 0.94 | 0.97 | 0.96 | 0.95 | 0.95 | 0.99 |
| P35580 | Myosin-10                                                                      | MYH10    | 15  | 21.9 | 0 | 62.77 | 0.92 | 0.58 | 0.58 | 0.89 | 1.10 | 0.52 | NaN  | 0.73 | NaN  |
| P35606 | Coatomer subunit beta                                                          | COPB2    | 23  | 35   | 0 | 136   | 0.92 | 0.87 | 0.90 | 1.15 | 0.90 | 0.92 | 1.01 | 0.78 | 1.22 |
| P35610 | Sterol O-acyltransferase 1                                                     | SOAT1    | 5   | 11.3 | 0 | 11.41 | 1.17 | 1.14 | 1.14 | 0.94 | 1.38 | 1.17 | NaN  | NaN  | 1.12 |
| P35613 | Basigin                                                                        | BSG      | 9   | 25.7 | 0 | 148.2 | 0.95 | 1.07 | 1.20 | 0.97 | 1.01 | 0.98 | 0.62 | 0.64 | 1.06 |
| P35637 | RNA-binding protein FUS                                                        | FUS      | 7   | 20   | 0 | 141.5 | 0.82 | 0.70 | 0.85 | 0.77 | 0.83 | 0.77 | 0.60 | 0.72 | 0.69 |
| P35998 | 26S protease regulatory subunit ADP-ribosylation factor-like protein 3         | PSMC2    | 22  | 61.7 | 0 | 323.3 | 1.10 | 1.08 | 1.05 | 1.09 | 1.01 | 1.02 | 1.02 | 1.07 | 1.04 |
| P36405 | E3 ubiquitin-protein ligase                                                    | ARL3     | 7   | 47.8 | 0 | 25.45 | 0.89 | 1.13 | 0.85 | 1.02 | 1.07 | 0.92 | 0.99 | 0.99 | 1.10 |
| P36406 | Dual specificity mitogen-activated protein kinase 2                            | TRIM23   | 1   | 1.7  | 0 | 3.773 | 0.62 | 0.61 | 0.71 | NaN  | 0.92 | 0.73 | NaN  | NaN  | 0.50 |
| P36507 | ATP synthase subunit gamma, mitochondrial                                      | MAP2K2   | 3   | 19.2 | 0 | 36.46 | 0.93 | 1.17 | 0.94 | 0.90 | 0.89 | 0.94 | 1.16 | 1.03 | 1.03 |
| P36542 | V-type proton ATPase subunit E 1;V-type proton ATPase subunit E 2              | ATP5C1   | 6   | 21.8 | 0 | 5.852 | 0.93 | 0.84 | 0.85 | NaN  | 1.29 | 1.11 | 0.85 | 1.35 | 0.68 |
| P36543 | Oxygen-dependent coproporphyrinogen-III oxidase, mitochondrial                 | ATP6V1E1 | 2   | 10.2 | 0 | 6.45  | NaN  | NaN  | 1.50 | NaN  | 0.63 | 0.86 | NaN  | NaN  | 1.14 |
| P36551 | 60S ribosomal protein L4                                                       | CPOX     | 13  | 36.3 | 0 | 141.9 | 1.13 | 1.16 | 1.03 | 1.04 | 1.01 | 1.06 | 0.97 | 1.08 | 1.18 |
| P36578 | Phosphoglucosyltransferase-1                                                   | RPL4     | 18  | 48.5 | 0 | 182.8 | 0.82 | 0.86 | 0.78 | 0.92 | 0.83 | 0.90 | 0.77 | 0.76 | 0.82 |
| P36871 |                                                                                | PGM1     | 22  | 47.7 | 0 | 305.2 | 1.12 | 0.96 | 1.10 | 1.04 | 1.09 | 1.11 | 1.03 | 1.16 | 1.16 |

|        |                                                                                                                                   |         |    |      |   |       |      |      |      |      |      |      |      |      |      |
|--------|-----------------------------------------------------------------------------------------------------------------------------------|---------|----|------|---|-------|------|------|------|------|------|------|------|------|------|
| P36957 | Dihydrolipoyllysine-residue succinyltransferase component of 2-oxoglutarate dehydrogenase complex. mitochondrial                  | DLST    | 8  | 18.8 | 0 | 16.23 | 0.94 | 0.99 | 0.94 | 1.10 | 0.96 | 1.03 | 1.07 | 0.86 | 0.83 |
| P37108 | Signal recognition particle 14 kDa protein                                                                                        | SRP14   | 4  | 47.1 | 0 | 31.51 | 0.92 | 1.00 | 0.86 | 0.63 | 0.74 | 0.85 | 0.93 | 0.92 | 1.01 |
| P37235 | Hippocalcin-like protein 1;Neuron-specific calcium-binding protein                                                                | HPCAL1  | 12 | 59.6 | 0 | 193.9 | 1.23 | 1.20 | 1.22 | 1.32 | 1.41 | 1.42 | 0.99 | 1.04 | 1.24 |
| X6RJP6 | Transgelin-2                                                                                                                      | TAGLN2  | 16 | 77.5 | 0 | 323.3 | 1.02 | 1.06 | 1.02 | 0.96 | 0.97 | 0.98 | 1.30 | 1.13 | 1.39 |
| P37837 | Transaldolase                                                                                                                     | TALDO1  | 22 | 52.8 | 0 | 183   | 1.15 | 1.12 | 1.13 | 1.18 | 1.22 | 1.23 | 0.95 | 1.01 | 1.01 |
| P38117 | Electron transfer flavoprotein subunit beta                                                                                       | ETFB    | 7  | 32.9 | 0 | 6.24  | 1.08 | 0.96 | 0.93 | 1.48 | 1.25 | 1.02 | NaN  | 0.86 | NaN  |
| P38159 | RNA-binding motif protein, X chromosome;RNA-binding motif protein, X chromosome, N-terminally processed;RNA binding motif protein | RBMX    | 17 | 40.4 | 0 | 98.15 | 0.72 | 0.75 | 0.82 | 0.68 | 0.72 | 0.85 | 0.65 | 0.70 | 0.74 |
| P38606 | X-linked-V-type proton ATPase catalytic subunit A                                                                                 | ATP6V1A | 10 | 24.6 | 0 | 204.4 | 0.88 | 0.94 | 0.96 | 1.20 | 0.88 | 0.97 | 1.10 | 1.29 | 1.15 |
| P38646 | Stress-70 protein, mitochondrial                                                                                                  | HSPA9   | 41 | 58.9 | 0 | 323.3 | 0.92 | 1.03 | 0.97 | 1.07 | 1.13 | 1.09 | 0.93 | 0.87 | 0.89 |
| P38919 | Eukaryotic initiation factor 4A-III;Eukaryotic initiation factor 4A-III, N-terminally processed                                   | EIF4A3  | 12 | 44   | 0 | 66.13 | 0.80 | 0.92 | 0.80 | 0.98 | 0.82 | 0.95 | 0.85 | 1.00 | 0.93 |
| P39019 | 40S ribosomal protein S19                                                                                                         | RPS19   | 12 | 67.6 | 0 | 53.31 | 0.86 | 0.79 | 0.78 | 0.79 | 0.81 | 0.80 | 0.77 | 0.75 | 0.80 |
| P39023 | 60S ribosomal protein L3                                                                                                          | RPL3    | 19 | 47.6 | 0 | 180.1 | 0.79 | 0.77 | 0.80 | 0.88 | 0.83 | 0.78 | 0.79 | 0.84 | 0.77 |
| P39687 | Acidic leucine-rich nuclear phosphoprotein 32 family member A                                                                     | ANP32A  | 6  | 34.1 | 0 | 216   | 1.16 | 1.08 | 1.02 | 0.87 | 0.89 | 1.11 | 1.21 | 1.17 | 0.92 |
| P39748 | Flap endonuclease 1                                                                                                               | FEN1    | 9  | 36.8 | 0 | 323.3 | 0.74 | 0.74 | 0.81 | 0.93 | 0.81 | 0.77 | 0.85 | 0.85 | 0.91 |
| P40121 | Macrophage-capping protein                                                                                                        | CAPG    | 16 | 56.6 | 0 | 323.3 | 0.93 | 0.97 | 1.01 | 0.90 | 0.94 | 1.04 | 1.07 | 0.80 | 0.98 |
| P40227 | T-complex protein 1 subunit zeta                                                                                                  | CCT6A   | 22 | 56.9 | 0 | 274   | 0.97 | 0.93 | 1.03 | 1.02 | 0.95 | 1.00 | 0.95 | 0.87 | 0.82 |
| P40306 | Proteasome subunit beta type-10                                                                                                   | PSMB10  | 2  | 11   | 0 | 34.47 | 0.70 | 0.61 | 0.81 | NaN  | NaN  | 1.07 | NaN  | NaN  | 0.88 |
| P40429 | 60S ribosomal protein L13a                                                                                                        | RPL13A  | 11 | 44.8 | 0 | 28.09 | 0.83 | 0.82 | 0.79 | 0.79 | 0.80 | 0.88 | 0.88 | 0.77 | 0.82 |
| P40616 | ADP-ribosylation factor-like protein 1                                                                                            | ARL1    | 4  | 35.4 | 0 | 4.354 | 0.71 | 0.93 | 1.06 | 0.89 | 0.94 | 1.07 | 0.87 | 0.74 | 0.92 |
| P40763 | Signal transducer and activator of transcription 3;Signal transducer and activator of transcription                               | STAT3   | 12 | 21.4 | 0 | 192.8 | NaN  | 0.78 | 0.74 | 0.95 | 0.92 | 1.15 | NaN  | NaN  | 0.74 |
| P40925 | Malate dehydrogenase, cytoplasmic;Malate dehydrogenase                                                                            | MDH1    | 15 | 46.4 | 0 | 323.3 | 0.88 | 0.94 | 0.86 | 0.92 | 1.01 | 0.99 | 0.94 | 0.96 | 0.97 |
| P40926 | Malate dehydrogenase, mitochondrial;Malate dehydrogenase                                                                          | MDH2    | 18 | 64.8 | 0 | 323.3 | 1.00 | 1.00 | 0.95 | 1.03 | 1.04 | 1.07 | 0.85 | 0.88 | 0.89 |

|        |                                                                                                                                                    |          |    |      |       |       |      |      |      |      |      |      |      |      |      |
|--------|----------------------------------------------------------------------------------------------------------------------------------------------------|----------|----|------|-------|-------|------|------|------|------|------|------|------|------|------|
| P41091 | Eukaryotic translation initiation factor 2 subunit 3;Putative eukaryotic translation initiation factor 2 subunit 3-like protein                    | EIF2S3   | 21 | 52.3 | 0     | 323.3 | 0.88 | 0.96 | 0.94 | 0.96 | 0.93 | 0.87 | 0.88 | 0.99 | 0.75 |
| P41219 | Peripherin                                                                                                                                         | PRPH     | 1  | 9.1  | 0     | 17.17 | 1.19 | 1.23 | 1.10 | NaN  | NaN  | 1.00 | NaN  | NaN  | 1.15 |
| P41227 | N-alpha-acetyltransferase 10                                                                                                                       | NAA10    | 6  | 32.3 | 0     | 47.69 | 1.06 | 1.15 | 1.09 | 1.22 | 1.16 | 0.97 | 0.96 | 1.14 | 1.26 |
| P41250 | Glycine--tRNA ligase                                                                                                                               | GARS     | 18 | 34.9 | 0     | 176.7 | 1.07 | 0.92 | 1.05 | 1.02 | 0.83 | 0.95 | 0.82 | 1.21 | 0.86 |
| P41252 | Isoleucine--tRNA ligase, cytoplasmic                                                                                                               | IARS     | 27 | 29   | 0     | 87.13 | 0.98 | 1.00 | 0.94 | 0.80 | 0.97 | 0.97 | 1.09 | 0.94 | 0.89 |
| P42126 | Enoyl-CoA delta isomerase 1, mitochondrial                                                                                                         | ECI1     | 4  | 20.5 | 0     | 11.94 | 0.82 | 0.87 | NaN  | NaN  | NaN  | 1.14 | NaN  | NaN  | NaN  |
| P42166 | Lamina-associated polypeptide 2, isoform                                                                                                           | TMPO     | 7  | 28.8 | 0     | 21.56 | NaN  | NaN  | NaN  | NaN  | 0.88 | 0.61 | 0.82 | 1.52 | NaN  |
| P42167 | alpha:Thymopoietin;Thymopentin Lamina-associated polypeptide 2, isoforms                                                                           | TMPO     | 7  | 39.6 | 0     | 287.4 | 1.03 | 1.06 | 1.12 | 1.01 | 1.00 | 1.03 | 1.01 | 1.03 | 0.98 |
| P42224 | beta/gamma;Thymopoietin;Thymopentin Signal transducer and activator of transcription 1-alpha/beta;Signal transducer and activator of transcription | STAT1    | 11 | 18.3 | 0     | 26.33 | NaN  | 0.68 | NaN  | 0.89 | 0.40 | 0.24 | 1.68 | NaN  | 0.48 |
| P42677 | 40S ribosomal protein S27                                                                                                                          | RPS27    | 2  | 39.3 | 0     | 23.07 | 0.90 | 0.97 | 0.85 | 0.99 | 0.77 | 0.85 | 1.14 | 1.04 | 0.93 |
| P42704 | Leucine-rich PPR motif-containing protein, mitochondrial                                                                                           | LRPPRC   | 51 | 49.1 | 0     | 323.3 | 0.85 | 0.86 | 0.75 | 0.83 | 0.92 | 0.90 | 1.11 | 0.85 | 0.86 |
| P42765 | 3-ketoacyl-CoA thiolase, mitochondrial                                                                                                             | ACAA2    | 6  | 23.4 | 0     | 47.21 | 3.66 | 4.52 | NaN  | NaN  | NaN  | 1.07 | 1.41 | 1.29 | NaN  |
| P42766 | 60S ribosomal protein L35                                                                                                                          | RPL35    | 3  | 26   | 0     | 8.24  | 0.99 | 1.00 | 0.96 | 1.02 | 1.09 | 0.97 | 1.02 | 0.89 | 0.90 |
| P43034 | Platelet-activating factor acetylhydrolase IB subunit alpha                                                                                        | PAFAH1B1 | 9  | 27.6 | 0     | 35.14 | 0.99 | 1.02 | 0.72 | NaN  | 1.56 | 0.81 | NaN  | NaN  | 0.85 |
| P43304 | Glycerol-3-phosphate dehydrogenase, mitochondrial;Glycerol-3-phosphate dehydrogenase                                                               | GPD2     | 4  | 8    | 0     | 14.55 | NaN  | NaN  | 0.84 | 0.70 | 0.92 | 1.14 | 0.63 | 0.63 | 0.72 |
| P43487 | Ran-specific GTPase-activating protein                                                                                                             | RANBP1   | 7  | 54.7 | 0     | 177.2 | 0.96 | 1.12 | 1.09 | 1.06 | 1.02 | 0.91 | 1.21 | 1.12 | 1.03 |
| P43490 | Nicotinamide phosphoribosyltransferase                                                                                                             | NAMPT    | 27 | 71.5 | 0     | 323.3 | 1.14 | 1.26 | 1.12 | 1.23 | 1.20 | 1.27 | 0.96 | 0.93 | 0.97 |
| P43686 | 26S protease regulatory subunit 6B                                                                                                                 | PSMC4    | 14 | 45.7 | 0     | 137.4 | 1.01 | 1.06 | 0.91 | 1.00 | 1.25 | 0.99 | 1.34 | 1.00 | 0.91 |
| P45974 | Ubiquitin carboxyl-terminal hydrolase 5                                                                                                            | USP5     | 15 | 30.9 | 0     | 134   | 0.91 | 1.09 | 1.13 | 1.14 | 0.86 | 1.05 | 0.75 | 0.53 | 1.06 |
| P46013 | Antigen KI-67                                                                                                                                      | MKI67    | 4  | 1.7  | 0.001 | 2.654 | NaN  | NaN  | NaN  | 1.99 | NaN  | 0.90 | NaN  | 0.80 | NaN  |
| P46060 | Ran GTPase-activating protein 1                                                                                                                    | RANGAP1  | 15 | 32.5 | 0     | 105.5 | 0.78 | 1.06 | 1.33 | 0.82 | 0.85 | 0.93 | 0.93 | 0.74 | 0.74 |
| P46108 | Adapter molecule crk                                                                                                                               | CRK      | 6  | 26   | 0     | 22.05 | 1.76 | 1.91 | NaN  | NaN  | 1.18 | 1.33 | NaN  | NaN  | 1.06 |
| P46777 | 60S ribosomal protein L5                                                                                                                           | RPL5     | 12 | 42.4 | 0     | 61.84 | 0.93 | 0.89 | 0.87 | 0.96 | 0.90 | 0.99 | 0.94 | 0.91 | 0.92 |
| P46778 | 60S ribosomal protein L21                                                                                                                          | RPL21    | 5  | 31.2 | 0     | 73.61 | 0.79 | 0.75 | 0.73 | 0.82 | 0.73 | 0.89 | 0.72 | 0.81 | 0.86 |

|        |                                                                                                  |         |    |      |   |       |      |      |      |      |      |      |      |      |      |
|--------|--------------------------------------------------------------------------------------------------|---------|----|------|---|-------|------|------|------|------|------|------|------|------|------|
| P46779 | 60S ribosomal protein L28<br>40S ribosomal protein                                               | RPL28   | 6  | 32.8 | 0 | 73.49 | 0.68 | 0.76 | 0.66 | 0.85 | 0.78 | 0.92 | 0.92 | 0.98 | 0.69 |
| P46783 | S10;Putative 40S ribosomal<br>protein S10-like                                                   | RPS10   | 12 | 58.8 | 0 | 24.65 | 1.02 | 0.96 | 0.96 | 0.94 | 0.92 | 0.95 | 1.05 | 1.10 | 0.98 |
| P46821 | Microtubule-associated protein<br>1B;MAP1B heavy chain;MAP1<br>light chain LC1                   | MAP1B   | 24 | 16.1 | 0 | 221.9 | 0.72 | 0.79 | 0.88 | 0.60 | 0.80 | 0.78 | 0.85 | 0.83 | 0.92 |
| P46939 | Utrophin                                                                                         | UTRN    | 7  | 3.5  | 0 | 11.54 | NaN  | NaN  | NaN  | NaN  | 0.59 | 2.09 | NaN  | NaN  | NaN  |
| P46940 | Ras GTPase-activating-like<br>protein IQGAP1                                                     | IQGAP1  | 67 | 56   | 0 | 323.3 | 0.84 | 0.78 | 0.83 | 0.88 | 0.92 | 0.92 | 0.94 | 0.95 | 0.92 |
| P46977 | Dolichyl-<br>diphosphooligosaccharide--<br>protein glycosyltransferase<br>subunit STT3A          | STT3A   | 4  | 7.7  | 0 | 6.068 | NaN  | 1.18 | NaN  | 0.75 | 1.15 | 1.05 | NaN  | 0.82 | NaN  |
| P47755 | F-actin-capping protein subunit<br>alpha-2<br>Eukaryotic translation initiation<br>factor 1A, X- | CAPZA2  | 5  | 43.4 | 0 | 55.95 | 1.10 | 1.03 | 1.37 | 1.42 | 1.08 | 1.08 | 1.17 | 1.11 | 1.45 |
| P47813 | chromosomal;Eukaryotic<br>translation initiation factor 1A, Y-<br>chromosomal                    | EIF1AX  | 5  | 35.4 | 0 | 5.237 | 0.75 | NaN  | 1.36 | 1.20 | NaN  | 0.87 | NaN  | NaN  | NaN  |
| P47897 | Glutamine--tRNA ligase<br>Cytochrome b-c1 complex<br>subunit Rieske,                             | QARS    | 5  | 36.1 | 0 | 34.15 | 0.72 | 0.81 | 0.73 | 1.17 | 0.95 | 0.91 | 0.83 | NaN  | 0.92 |
| P47985 | mitochondrial;Cytochrome b-c1<br>complex subunit 11;Putative<br>cytochrome b-c1 complex subunit  | UQCRFS1 | 2  | 8    | 0 | 3.381 | 0.77 | 1.31 | NaN  | 1.26 | NaN  | 0.77 | NaN  | NaN  | NaN  |
| P48047 | ATP synthase subunit O,<br>mitochondrial                                                         | ATP5O   | 8  | 48.4 | 0 | 106.6 | 1.12 | 1.08 | 1.34 | 1.03 | 1.04 | 1.02 | 0.77 | 0.84 | 0.88 |
| P48059 | LIM and senescent cell antigen-<br>like-containing domain protein 1                              | LIMS1   | 2  | 13.8 | 0 | 11.98 | 1.04 | 1.55 | 1.08 | 1.38 | NaN  | 0.96 | 0.93 | NaN  | 1.04 |
| P48147 | Prolyl endopeptidase                                                                             | PREP    | 7  | 12.8 | 0 | 15.33 | 1.52 | 1.01 | 1.29 | 1.17 | 0.79 | 1.23 | 0.78 | 1.32 | 1.39 |
| P48449 | Lanosterol synthase                                                                              | LSS     | 4  | 6.3  | 0 | 2.993 | NaN  | 1.13 | 1.11 | NaN  | 2.28 | NaN  | NaN  | NaN  | NaN  |
| P48507 | Glutamate--cysteine ligase<br>regulatory subunit                                                 | GCLM    | 4  | 20.8 | 0 | 52.89 | 1.81 | 1.82 | 1.75 | 1.34 | 2.10 | 1.18 | NaN  | NaN  | 1.15 |
| R4GMR5 | 26S proteasome non-ATPase<br>regulatory subunit 8                                                | PSMD8   | 8  | 35.9 | 0 | 8.603 | 1.04 | 0.91 | 1.28 | 1.35 | 0.92 | 1.14 | 1.07 | 0.92 | 1.15 |
| P48643 | T-complex protein 1 subunit<br>epsilon                                                           | CCT5    | 30 | 60.3 | 0 | 323.3 | 1.00 | 1.07 | 1.07 | 0.88 | 1.09 | 1.03 | 0.59 | 0.64 | 0.95 |
| P48735 | Isocitrate dehydrogenase<br>[NADP], mitochondrial                                                | IDH2    | 6  | 15.5 | 0 | 9.779 | 0.73 | 0.85 | 0.93 | 1.23 | 1.14 | 0.99 | NaN  | NaN  | 1.09 |
| P48960 | CD97 antigen;CD97 antigen<br>subunit alpha;CD97 antigen<br>subunit beta                          | CD97    | 10 | 19.5 | 0 | 138   | 1.11 | 1.14 | 1.04 | 0.90 | 0.97 | 1.08 | 0.72 | 0.74 | 0.93 |
| P49189 | 4-trimethylaminobutyraldehyde<br>dehydrogenase                                                   | ALDH9A1 | 10 | 23.1 | 0 | 49.82 | 0.65 | 0.64 | 0.90 | NaN  | 0.87 | 0.73 | 0.87 | 0.90 | 0.99 |
| P49207 | 60S ribosomal protein L34                                                                        | RPL34   | 4  | 29.9 | 0 | 7.227 | 1.12 | 1.10 | 0.98 | 0.83 | 0.99 | 1.01 | 0.73 | 0.85 | 0.91 |

|        |                                                                                                                                                                                                                                                                                                       |          |    |      |       |       |      |      |      |      |      |      |      |      |      |
|--------|-------------------------------------------------------------------------------------------------------------------------------------------------------------------------------------------------------------------------------------------------------------------------------------------------------|----------|----|------|-------|-------|------|------|------|------|------|------|------|------|------|
| P49257 | Protein ERGIC-53                                                                                                                                                                                                                                                                                      | LMAN1    | 10 | 31.8 | 0     | 52.31 | 1.21 | 1.11 | 1.13 | 0.87 | 1.24 | 1.21 | 0.71 | 1.20 | 0.94 |
| P49321 | Nuclear autoantigenic sperm protein                                                                                                                                                                                                                                                                   | NASP     | 13 | 21.1 | 0     | 53.19 | 1.19 | 0.95 | 1.10 | 0.91 | 1.05 | 1.12 | 0.92 | 1.16 | 0.74 |
| P49327 | Fatty acid synthase:[Acyl-carrier-protein] S-acetyltransferase:[Acyl-carrier-protein] S-malonyltransferase;3-oxoacyl-[acyl-carrier-protein] synthase;3-oxoacyl-[acyl-carrier-protein] reductase;3-hydroxyacyl-[acyl-carrier-protein] dehydratase;Enoyl-[acyl-carrier-protein] reductase;Oleoyl-[acyl- | FASN     | 88 | 48.1 | 0     | 323.3 | 0.62 | 0.58 | 0.52 | 0.67 | 0.67 | 0.67 | 0.81 | 0.78 | 0.84 |
| Q5J8M5 | Deoxyhypusine synthase                                                                                                                                                                                                                                                                                | DHPS     | 2  | 9    | 0.009 | 1.409 | NaN  | 0.75 | NaN  | NaN  | 1.00 | 0.61 | 0.79 | 0.83 | NaN  |
| P49368 | T-complex protein 1 subunit gamma                                                                                                                                                                                                                                                                     | CCT3     | 33 | 66.8 | 0     | 290.2 | 1.01 | 0.99 | 1.05 | 0.92 | 1.06 | 0.94 | 0.88 | 0.89 | 0.88 |
| P49411 | Elongation factor Tu, Signal recognition particle 9 kDa protein                                                                                                                                                                                                                                       | TUFM     | 21 | 54.6 | 0     | 323.3 | 1.17 | 1.08 | 1.08 | 1.08 | 1.02 | 1.07 | 0.99 | 0.99 | 1.05 |
| P49458 | Alanine--tRNA ligase,                                                                                                                                                                                                                                                                                 | SRP9     | 3  | 32.6 | 0     | 6.256 | 0.81 | 0.91 | 0.81 | 1.00 | 1.32 | 0.91 | 1.00 | 1.07 | 0.91 |
| P49588 | Serine--tRNA ligase, cytoplasmic                                                                                                                                                                                                                                                                      | AARS     | 18 | 25.9 | 0     | 81.5  | 0.68 | 0.59 | 0.94 | 0.83 | 1.06 | 0.86 | 1.02 | 1.14 | 0.90 |
| Q5T5C7 | Protein phosphatase 1F                                                                                                                                                                                                                                                                                | SARS     | 12 | 30.6 | 0     | 42.16 | 0.71 | 0.82 | 0.52 | 0.63 | 0.79 | 0.79 | 0.92 | 0.95 | 0.96 |
| P49593 | Proteasome subunit beta type-3                                                                                                                                                                                                                                                                        | PPM1F    | 5  | 20.7 | 0     | 27.08 | NaN  | 1.10 | 1.28 | NaN  | NaN  | 0.73 | NaN  | NaN  | 1.50 |
| P49720 | Proteasome subunit beta type-2                                                                                                                                                                                                                                                                        | PSMB3    | 8  | 46.8 | 0     | 143.2 | 0.88 | 0.92 | 0.95 | 1.10 | 1.13 | 0.92 | 0.98 | 1.07 | 0.59 |
| P49721 | Very long-chain specific acyl-CoA dehydrogenase, mitochondrial                                                                                                                                                                                                                                        | PSMB2    | 10 | 50.2 | 0     | 28.24 | 0.91 | 0.97 | 1.01 | 0.90 | 0.98 | 1.09 | 0.85 | 0.70 | 0.87 |
| P49748 | Transmembrane emp24 domain-containing protein 10                                                                                                                                                                                                                                                      | ACADVL   | 23 | 47.3 | 0     | 323.3 | 1.12 | 1.07 | 1.18 | 1.15 | 1.18 | 1.15 | 1.32 | 1.24 | 1.20 |
| P49755 | RNA-binding protein 25                                                                                                                                                                                                                                                                                | TMED10   | 4  | 19.6 | 0     | 16.78 | 0.87 | 0.73 | 0.74 | 1.19 | 1.07 | 0.99 | 0.97 | 0.95 | 0.51 |
| P49756 | Histidine triad nucleotide-binding protein 1                                                                                                                                                                                                                                                          | RBM25    | 3  | 5.6  | 0     | 10.3  | 1.05 | 1.31 | 0.81 | 1.23 | NaN  | 1.40 | NaN  | 1.00 | 1.24 |
| P49773 | E3 SUMO-protein ligase RanBP2                                                                                                                                                                                                                                                                         | HINT1    | 6  | 78.6 | 0     | 187.4 | 1.33 | 1.30 | 1.31 | 1.09 | 1.28 | 1.26 | 1.12 | 1.16 | 1.08 |
| P49792 | GMP synthase [glutamine-hydrolyzing]                                                                                                                                                                                                                                                                  | RANBP2   | 4  | 2.1  | 0     | 4.926 | 1.06 | NaN  | NaN  | NaN  | NaN  | NaN  | 1.11 | NaN  | 0.75 |
| P49915 | Isocitrate dehydrogenase [NAD] subunit alpha, mitochondrial                                                                                                                                                                                                                                           | GMPS     | 13 | 30   | 0     | 33.75 | 0.80 | 0.94 | 0.79 | NaN  | 0.74 | 1.01 | NaN  | 0.91 | 0.96 |
| P50213 | Rab GDP dissociation inhibitor beta                                                                                                                                                                                                                                                                   | IDH3A    | 4  | 16.1 | 0     | 5.695 | NaN  | 1.34 | 1.17 | 1.20 | 1.10 | 1.36 | NaN  | NaN  | 1.05 |
| P50395 | Emerin                                                                                                                                                                                                                                                                                                | GDI2     | 21 | 72.4 | 0     | 323.3 | 0.96 | 0.96 | 0.98 | 0.98 | 1.00 | 1.01 | 0.95 | 1.02 | 1.00 |
| P50402 | Carnitine O-palmitoyltransferase 1, liver isoform                                                                                                                                                                                                                                                     | EMD      | 6  | 31.1 | 0     | 66.91 | NaN  | 1.31 | 1.25 | NaN  | 1.12 | 0.93 | NaN  | NaN  | 1.74 |
| P50416 | Serpine B9                                                                                                                                                                                                                                                                                            | CPT1A    | 8  | 13.2 | 0     | 17.54 | 0.98 | 0.95 | 0.91 | 0.83 | 1.26 | 0.96 | 1.38 | NaN  | 0.99 |
| P50453 | Serpine H1                                                                                                                                                                                                                                                                                            | SERPINB9 | 10 | 37.2 | 0     | 29.11 | 1.25 | NaN  | 1.43 | 0.66 | 1.03 | NaN  | NaN  | NaN  | 1.43 |
| P50454 | Hsc70-interacting protein;Putative protein                                                                                                                                                                                                                                                            | SERPINH1 | 17 | 47.6 | 0     | 307.8 | 1.06 | 1.01 | 1.04 | 0.98 | 1.07 | 0.95 | 0.96 | 1.01 | 1.03 |
| P50502 | FAM10A5;Putative protein                                                                                                                                                                                                                                                                              | ST13     | 9  | 29   | 0     | 121.4 | 1.05 | 1.04 | 1.11 | 1.04 | 1.00 | 1.00 | 0.87 | 0.84 | 0.99 |

|        |                                                                   |         |    |      |       |       |      |      |      |      |      |      |      |      |      |
|--------|-------------------------------------------------------------------|---------|----|------|-------|-------|------|------|------|------|------|------|------|------|------|
| P50552 | Vasodilator-stimulated phosphoprotein                             | VASP    | 11 | 36.6 | 0     | 73.08 | 1.09 | 1.21 | 1.21 | 1.61 | 1.08 | 0.69 | 2.01 | 0.93 | 1.06 |
| P50570 | Dynamamin-2                                                       | DNM2    | 13 | 30.8 | 0     | 97.16 | 1.25 | 1.01 | 0.99 | 0.66 | 0.98 | 1.13 | 1.29 | 1.16 | 0.86 |
| P50583 | Bis(5-nucleosyl)-tetraphosphatase [asymmetrical]                  | NUDT2   | 1  | 16.3 | 0     | 10.78 | 0.77 | 0.80 | 0.74 | NaN  | NaN  | 0.82 | NaN  | NaN  | NaN  |
| P50914 | 60S ribosomal protein L14                                         | RPL14   | 5  | 26   | 0     | 21.07 | 0.80 | 0.84 | 0.88 | 0.88 | 0.61 | 0.82 | 0.74 | NaN  | 0.72 |
| P50990 | T-complex protein 1 subunit theta                                 | CCT8    | 39 | 73.9 | 0     | 323.3 | 1.06 | 1.02 | 1.07 | 1.10 | 0.99 | 1.10 | 0.96 | 0.87 | 0.92 |
| P50991 | T-complex protein 1 subunit delta                                 | CCT4    | 27 | 61.2 | 0     | 323.3 | 1.05 | 0.98 | 1.09 | 0.99 | 1.03 | 1.11 | 0.85 | 0.85 | 0.91 |
| P50995 | Annexin A11                                                       | ANXA11  | 15 | 31.5 | 0     | 110.2 | 0.72 | 0.67 | 0.88 | 0.79 | 0.90 | 1.01 | 0.91 | 1.10 | 0.88 |
| P51114 | Fragile X mental retardation syndrome-related protein 1           | FXR1    | 7  | 21.7 | 0     | 67.08 | 1.08 | 1.00 | 1.27 | 0.82 | 1.33 | 1.28 | 2.11 | 0.89 | 1.16 |
| P51116 | Fragile X mental retardation syndrome-related protein 2           | FXR2    | 3  | 8.8  | 0     | 5.968 | 0.99 | 0.95 | NaN  | NaN  | NaN  | NaN  | 0.73 | NaN  | NaN  |
| P51148 | Ras-related protein Rab-5C                                        | RAB5C   | 7  | 65.3 | 0     | 271.2 | 0.96 | 1.00 | 0.97 | 0.95 | 1.01 | 1.03 | 1.02 | 1.08 | 0.90 |
| P51149 | Ras-related protein Rab-7a                                        | RAB7A   | 11 | 69.6 | 0     | 71.23 | 0.93 | 0.90 | 0.84 | 0.96 | 0.87 | 0.91 | 1.17 | 1.52 | 1.04 |
| P51397 | Death-associated protein 1                                        | DAP     | 2  | 19.6 | 5E-04 | 2.767 | NaN  | NaN  | NaN  | 0.97 | NaN  | 1.13 | NaN  | 0.58 | NaN  |
| P51571 | Translocon-associated protein subunit delta                       | SSR4    | 3  | 24.3 | 0     | 25.4  | 0.99 | 1.13 | NaN  | NaN  | 0.93 | NaN  | NaN  | NaN  | 1.06 |
| P51572 | B-cell receptor-associated protein 31                             | BCAP31  | 14 | 48   | 0     | 35.45 | 0.75 | 0.72 | 0.66 | 1.16 | 0.96 | 1.10 | 1.11 | 1.16 | 0.69 |
| P51665 | 26S proteasome non-ATPase regulatory subunit 7                    | PSMD7   | 8  | 36.4 | 0     | 150   | 1.11 | 1.03 | 1.13 | 1.34 | 1.02 | 0.98 | 0.56 | 1.13 | 0.89 |
| P51858 | Hepatoma-derived growth factor NADH dehydrogenase                 | HDGF    | 13 | 65   | 0     | 323.3 | 0.89 | 0.72 | 0.79 | 1.04 | 1.08 | 0.83 | 0.96 | 1.33 | 0.79 |
| P51970 | [ubiquinone] 1 alpha subcomplex subunit 8                         | NDUFA8  | 3  | 20.3 | 0     | 5.947 | 1.02 | 1.17 | 1.11 | 1.57 | 1.31 | 1.27 | NaN  | 1.14 | 1.20 |
| P51991 | Heterogeneous nuclear ribonucleoprotein A3                        | HNRNPA3 | 19 | 49.7 | 0     | 323.3 | 0.84 | 0.83 | 0.81 | 0.82 | 0.93 | 0.84 | 0.99 | 0.94 | 0.92 |
| P52209 | 6-phosphogluconate dehydrogenase, decarboxylating                 | PGD     | 19 | 44.9 | 0     | 184.5 | 0.86 | 0.93 | 0.89 | 0.94 | 0.94 | 1.01 | 0.95 | 0.82 | 1.00 |
| P52272 | Heterogeneous nuclear ribonucleoprotein M                         | HNRNPM  | 38 | 61.2 | 0     | 323.3 | 0.88 | 0.88 | 0.83 | 1.04 | 0.99 | 0.96 | 0.80 | 1.10 | 0.78 |
| P52292 | Importin subunit alpha-1                                          | KPNA2   | 9  | 21.7 | 0     | 265.6 | 1.33 | 1.11 | 1.19 | 1.37 | 1.45 | 1.39 | 0.76 | 0.64 | 1.22 |
| P52306 | Rap1 GTPase-GDP dissociation stimulator 1                         | RAP1GDS | 7  | 16.5 | 0     | 9.593 | NaN  | 0.66 | 0.69 | 1.09 | NaN  | NaN  | 1.13 | 1.01 | 1.39 |
| P52565 | Rho GDP-dissociation inhibitor 1                                  | ARHGDI1 | 11 | 60.3 | 0     | 323.3 | 0.93 | 0.97 | 1.05 | 0.95 | 1.02 | 0.94 | 0.91 | 1.02 | 0.94 |
| P52566 | Rho GDP-dissociation inhibitor 2                                  | ARHGDI2 | 6  | 50.7 | 0     | 49.38 | 0.88 | 1.14 | 0.92 | NaN  | NaN  | 0.93 | NaN  | 1.38 | 0.91 |
| P52597 | Heterogeneous nuclear ribonucleoprotein F, N-terminally processed | HNRNPF  | 13 | 54.7 | 0     | 112.2 | 0.99 | 1.16 | 1.00 | 1.09 | 0.98 | 1.02 | 0.94 | 0.97 | 0.90 |
| P52788 | Spermine synthase                                                 | SMS     | 21 | 73   | 0     | 323.3 | 0.92 | 1.04 | 0.98 | 1.02 | 1.00 | 1.04 | 1.05 | 0.98 | 1.01 |
| P52888 | Thimet oligopeptidase                                             | THOP1   | 4  | 8.9  | 0     | 16.69 | 0.90 | 0.82 | 1.09 | NaN  | 0.97 | NaN  | 2.18 | 1.23 | 1.17 |
| P52907 | F-actin-capping protein subunit alpha-1                           | CAPZA1  | 11 | 64.7 | 0     | 323.3 | 0.98 | 1.16 | 1.17 | 0.99 | 1.04 | 1.05 | 1.03 | 0.92 | 1.08 |
| P53004 | Biliverdin reductase A                                            | BLVRA   | 8  | 32.4 | 0     | 153.2 | 0.85 | 0.71 | 0.72 | 0.96 | 0.92 | 0.77 | 0.69 | 0.72 | 0.76 |



|        |                                                                                                  |          |    |      |   |       |      |      |      |      |      |      |      |      |      |
|--------|--------------------------------------------------------------------------------------------------|----------|----|------|---|-------|------|------|------|------|------|------|------|------|------|
| P53007 | Tricarboxylate transport protein, mitochondrial                                                  | SLC25A1  | 6  | 26.4 | 0 | 31.7  | 0.82 | 0.80 | 0.95 | 0.77 | 1.15 | 0.84 | 0.95 | 0.67 | 0.85 |
| P53396 | ATP-citrate synthase                                                                             | ACLY     | 36 | 38.1 | 0 | 308.1 | 0.95 | 0.91 | 0.92 | 0.94 | 0.91 | 0.82 | 1.04 | 1.04 | 1.02 |
| P53582 | Methionine aminopeptidase 1                                                                      | METAP1   | 2  | 8.5  | 0 | 2.872 | 1.09 | 0.93 | 1.24 | NaN  | NaN  | NaN  | NaN  | NaN  | 1.44 |
| P53597 | Succinyl-CoA ligase [ADP/GDP-forming] subunit alpha, mitochondrial                               | SUCLG1   | 5  | 22.8 | 0 | 11.53 | NaN  | 0.75 | 1.14 | NaN  | 0.47 | 0.46 | 0.63 | 1.91 | 0.81 |
| P53618 | Coatomer subunit beta                                                                            | COPB1    | 37 | 49.3 | 0 | 281.2 | 0.95 | 0.87 | 0.98 | 0.95 | 0.99 | 0.91 | 1.02 | 1.03 | 0.90 |
| P53992 | Protein transport protein Sec24C                                                                 | SEC24C   | 8  | 9.7  | 0 | 26.82 | 0.84 | 0.66 | 0.82 | 0.78 | 1.01 | 0.81 | 0.71 | NaN  | 0.80 |
| P53999 | Activated RNA polymerase II transcriptional coactivator p15                                      | SUB1     | 8  | 46.5 | 0 | 60.41 | 1.01 | 1.02 | 1.00 | 1.14 | NaN  | 1.31 | NaN  | 1.81 | 1.22 |
| P54136 | Arginine--tRNA ligase, Tyrosine--tRNA ligase, cytoplasmic;                                       | RARS     | 24 | 43.5 | 0 | 102.6 | 0.99 | 0.94 | 0.94 | 0.96 | 0.98 | 0.95 | 0.86 | 0.77 | 0.89 |
| P54577 | Tyrosine--tRNA ligase, cytoplasmic, N-terminally processed;                                      | YARS     | 16 | 41.1 | 0 | 63.11 | 1.01 | 1.06 | 1.00 | 0.95 | 0.79 | 0.92 | 0.86 | 1.00 | 1.31 |
| P54578 | Tyrosine--tRNA ligase Ubiquitin carboxyl-terminal hydrolase 14;                                  | USP14    | 18 | 38.7 | 0 | 302.2 | 1.00 | 0.79 | 0.79 | 1.04 | 0.95 | 1.20 | 0.62 | 1.10 | 1.06 |
| P54709 | Sodium/potassium-transporting ATPase subunit beta-3                                              | ATP1B3   | 7  | 29.4 | 0 | 11.58 | 1.13 | 1.33 | 1.24 | 1.17 | 1.24 | 0.95 | 1.03 | 1.15 | 0.86 |
| P54727 | UV excision repair protein RAD23 homolog B                                                       | RAD23B   | 9  | 32   | 0 | 323.3 | 0.96 | 0.96 | 0.61 | 1.07 | 0.94 | 0.82 | 1.07 | 1.13 | 1.00 |
| P54886 | Delta-1-pyrroline-5-carboxylate synthase; Glutamate 5-kinase; Gamma-glutamyl phosphate reductase | ALDH18A1 | 14 | 26.8 | 0 | 26.55 | 0.73 | 0.76 | 0.75 | 0.91 | NaN  | 0.73 | 0.78 | 0.73 | 0.83 |
| P54920 | Alpha-soluble NSF attachment protein                                                             | NAPA     | 6  | 25.8 | 0 | 9.499 | NaN  | NaN  | 1.06 | 0.63 | 0.71 | 0.93 | NaN  | NaN  | 0.60 |
| P55010 | Eukaryotic translation initiation factor 5                                                       | EIF5     | 9  | 26.5 | 0 | 37.49 | 1.20 | 1.23 | 1.34 | 1.07 | 0.93 | 0.91 | 0.99 | 0.93 | 0.92 |
| P55036 | 26S proteasome non-ATPase regulatory subunit 4                                                   | PSMD4    | 6  | 36.1 | 0 | 56.78 | 0.86 | 0.90 | 1.43 | 1.30 | 1.05 | 0.91 | 0.86 | 0.79 | NaN  |
| P55060 | Exportin-2                                                                                       | CSE1L    | 34 | 37.5 | 0 | 323.3 | 0.92 | 0.91 | 0.94 | 0.92 | 0.93 | 0.90 | 0.84 | 0.83 | 0.92 |
| P55072 | Transitional endoplasmic reticulum ATPase                                                        | VCP      | 40 | 58.6 | 0 | 323.3 | 0.96 | 1.02 | 1.01 | 1.04 | 1.02 | 1.07 | 0.99 | 0.96 | 0.93 |
| P55084 | Trifunctional enzyme subunit beta, mitochondrial;                                                | HADHB    | 11 | 31   | 0 | 30.96 | 1.09 | 0.95 | 1.10 | 1.23 | 0.68 | 1.28 | 0.64 | 1.07 | 0.65 |
| P55263 | 3-ketoacyl-CoA thiolase                                                                          | ADK      | 11 | 35.9 | 0 | 49.97 | 0.98 | 0.97 | 0.84 | 0.62 | 0.80 | 0.63 | 0.95 | 1.40 | 1.17 |
| P55735 | Adenosine kinase                                                                                 | SEC13    | 6  | 31.4 | 0 | 167.9 | NaN  | NaN  | 1.68 | 1.35 | 1.00 | 1.30 | 1.42 | NaN  | NaN  |
| P55795 | Protein SEC13 homolog                                                                            | HNRNPH2  | 4  | 31.6 | 0 | 11.62 | 1.08 | 0.67 | 1.01 | 1.34 | 1.27 | 0.85 | NaN  | 0.88 | 0.75 |
| P55884 | Heterogeneous nuclear ribonucleoprotein H2 Eukaryotic translation initiation factor 3 subunit B  | EIF3B    | 25 | 39.4 | 0 | 323.3 | 1.18 | 1.10 | 1.19 | 0.91 | 1.23 | 1.02 | 0.97 | 1.18 | 0.94 |

|        |                                                                                                                                                                 |         |    |      |       |       |      |      |      |      |      |      |      |      |      |
|--------|-----------------------------------------------------------------------------------------------------------------------------------------------------------------|---------|----|------|-------|-------|------|------|------|------|------|------|------|------|------|
| P55957 | BH3-interacting domain death agonist;BH3-interacting domain death agonist p15;BH3-interacting domain death agonist p13;BH3-interacting domain death agonist n11 | BID     | 4  | 36.4 | 0     | 19.15 | 0.90 | NaN  | 1.38 | NaN  | NaN  | 1.23 | NaN  | NaN  | 0.89 |
| P56182 | Ribosomal RNA processing protein 1 homolog A                                                                                                                    | RRP1    | 1  | 2.6  | 0.001 | 2.732 | 1.07 | NaN  | 1.21 | NaN  | NaN  | NaN  | NaN  | NaN  | NaN  |
| P56192 | Methionine--tRNA ligase, cytoplasmic                                                                                                                            | MARS    | 12 | 20.4 | 0     | 46.39 | 0.89 | 1.01 | 1.02 | 0.77 | 0.95 | 0.87 | 0.93 | 0.81 | 0.93 |
| P56385 | ATP synthase subunit e, mitochondrial                                                                                                                           | ATP5I   | 2  | 31.9 | 5E-04 | 2.788 | 1.05 | 1.16 | 1.17 | 1.14 | 1.09 | 1.94 | NaN  | NaN  | 1.09 |
| P56537 | Eukaryotic translation initiation factor 6                                                                                                                      | EIF6    | 7  | 40.8 | 0     | 269.5 | 0.78 | 0.80 | 0.59 | 0.85 | 0.82 | 0.96 | 0.90 | 1.08 | 0.69 |
| P58546 | Myotrophin                                                                                                                                                      | MTPN    | 4  | 57.6 | 0     | 195.7 | 1.14 | 1.15 | 0.92 | 1.26 | 0.85 | 1.10 | 0.96 | 1.04 | 0.97 |
| P60174 | Triosephosphate isomerase                                                                                                                                       | TPI1    | 18 | 74.1 | 0     | 323.3 | 1.18 | 1.19 | 1.16 | 1.23 | 1.15 | 1.17 | 1.14 | 1.11 | 1.15 |
| P60228 | Eukaryotic translation initiation factor 3 subunit E                                                                                                            | EIF3E   | 17 | 45.4 | 0     | 109.6 | 1.03 | 1.10 | 1.09 | 0.94 | 1.23 | 1.17 | 0.83 | 0.79 | 0.93 |
| P60842 | Eukaryotic initiation factor 4A-I                                                                                                                               | EIF4A1  | 13 | 59.9 | 0     | 323.3 | 1.02 | 1.05 | 1.01 | 1.17 | 1.11 | 1.08 | 0.83 | 0.89 | 0.80 |
| P60866 | 40S ribosomal protein S20                                                                                                                                       | RPS20   | 4  | 28.6 | 0     | 18.36 | 0.86 | 0.88 | 0.89 | 0.83 | 0.95 | 0.94 | 0.80 | 0.87 | 0.84 |
| P60903 | Protein S100-A10                                                                                                                                                | S100A10 | 5  | 37.1 | 0     | 95.7  | 0.87 | 0.82 | 0.80 | 0.93 | 0.93 | 0.91 | 0.87 | 0.90 | 0.94 |
| P60953 | Cell division control protein 42 homolog                                                                                                                        | CDC42   | 6  | 42.4 | 0     | 56.09 | 1.12 | 1.04 | 1.01 | 0.99 | 0.95 | 0.99 | 0.87 | 0.91 | 0.89 |
| P60981 | Destrin                                                                                                                                                         | DSTN    | 14 | 66.1 | 0     | 226.9 | 0.82 | 0.89 | 0.94 | 1.03 | 1.04 | 1.02 | 1.04 | 1.04 | 0.96 |
| P61006 | Ras-related protein Rab-8A                                                                                                                                      | RAB8A   | 5  | 35.7 | 0     | 36.55 | 1.06 | 1.05 | 1.07 | 1.15 | 0.95 | 0.85 | 1.12 | 0.86 | 0.82 |
| P61009 | Signal peptidase complex subunit 3                                                                                                                              | SPCS3   | 2  | 11.1 | 0.005 | 1.709 | 1.42 | NaN  | 1.28 | 0.75 | NaN  | 1.03 | NaN  | 2.03 | 1.53 |
| P61011 | Signal recognition particle 54 kDa protein                                                                                                                      | SRP54   | 8  | 21.8 | 0     | 39.59 | 0.84 | 0.60 | 0.88 | NaN  | 0.72 | 0.75 | NaN  | NaN  | 0.84 |
| P61019 | Ras-related protein Rab-2A;Ras-related protein Rab-2B                                                                                                           | RAB2A   | 10 | 60.4 | 0     | 65.63 | 1.11 | 0.95 | 0.67 | NaN  | 0.91 | 0.81 | NaN  | 1.14 | 0.67 |
| P61020 | Ras-related protein Rab-5B                                                                                                                                      | RAB5B   | 5  | 45.1 | 0     | 30.39 | NaN  | 0.91 | 0.44 | 0.86 | NaN  | 1.30 | NaN  | 1.11 | 1.36 |
| Q5T179 | Cyclin-dependent kinases regulatory subunit;Cyclin-dependent kinases regulatory subunit 1                                                                       | CKS1B   | 2  | 38.8 | 0     | 10.59 | 1.21 | 1.20 | 1.19 | NaN  | 0.98 | 1.70 | NaN  | NaN  | NaN  |
| P61026 | Ras-related protein Rab-10                                                                                                                                      | RAB10   | 6  | 43   | 0     | 46.05 | 0.99 | 0.95 | 1.04 | 1.18 | 1.07 | 1.02 | 1.24 | 0.97 | 0.96 |
| P61081 | NEDD8-conjugating enzyme Ubc12                                                                                                                                  | UBE2M   | 8  | 39.3 | 0     | 100.6 | 0.69 | 0.96 | 1.50 | 0.81 | 0.84 | 1.10 | 0.91 | 0.88 | 0.68 |
| P61086 | Ubiquitin-conjugating enzyme E2                                                                                                                                 | UBE2K   | 7  | 44   | 0     | 17.9  | 1.14 | 0.92 | 1.19 | NaN  | 1.04 | 1.13 | NaN  | NaN  | 1.03 |
| P61088 | Ubiquitin-conjugating enzyme E2 N;Putative ubiquitin-conjugating enzyme E2 N-like                                                                               | UBE2N   | 8  | 59.2 | 0     | 70.22 | 1.03 | 0.93 | 1.01 | 1.09 | 0.98 | 1.01 | 1.08 | 1.10 | 0.91 |
| P61106 | Ras-related protein Rab-14                                                                                                                                      | RAB14   | 13 | 70.7 | 0     | 95.77 | 1.00 | 1.02 | 1.09 | 1.02 | 0.96 | 1.05 | 0.88 | 0.93 | 0.90 |
| P61158 | Actin-related protein 3                                                                                                                                         | ACTR3   | 18 | 57.2 | 0     | 267.7 | 1.01 | 1.09 | 0.90 | 1.02 | 1.02 | 1.04 | 1.06 | 1.12 | 1.16 |
| P61160 | Actin-related protein 2                                                                                                                                         | ACTR2   | 13 | 36.3 | 0     | 92.17 | 1.18 | 1.00 | 1.12 | 1.03 | 1.20 | 0.97 | NaN  | NaN  | 1.06 |
| P61163 | Alpha-centractin                                                                                                                                                | ACTR1A  | 5  | 32.2 | 0     | 75.76 | 0.94 | 0.85 | 0.85 | 1.24 | 0.98 | 0.99 | 1.73 | 1.33 | 1.18 |

|        |                                                                                                       |        |    |      |   |       |      |      |      |      |      |      |      |      |      |
|--------|-------------------------------------------------------------------------------------------------------|--------|----|------|---|-------|------|------|------|------|------|------|------|------|------|
| P61221 | ATP-binding cassette sub-family E member 1                                                            | ABCE1  | 15 | 30.7 | 0 | 43.66 | 0.72 | 0.62 | 0.84 | 0.80 | 0.86 | 0.69 | 0.94 | 0.76 | 0.86 |
| P61224 | Ras-related protein Rap-1b;Ras-related protein Rap-1b-like                                            | RAP1B  | 3  | 65.2 | 0 | 90.52 | 1.14 | 0.99 | 1.06 | 0.97 | 0.90 | 0.97 | 1.12 | 1.05 | 0.80 |
| P61247 | 40S ribosomal protein S3a                                                                             | RPS3A  | 15 | 51.9 | 0 | 212.1 | 0.84 | 0.81 | 0.87 | 0.81 | 0.82 | 0.81 | 0.78 | 0.82 | 0.82 |
| P61254 | 60S ribosomal protein L26;60S ribosomal protein L26-like 1                                            | RPL26  | 6  | 36.6 | 0 | 5.751 | 0.83 | 0.87 | 0.88 | 1.53 | 0.84 | 0.79 | 0.95 | 0.66 | 0.79 |
| P61289 | Proteasome activator complex subunit 3                                                                | PSME3  | 6  | 28.7 | 0 | 26.4  | 1.04 | 1.13 | 1.18 | 1.31 | 1.18 | 1.05 | 1.17 | 1.00 | 1.13 |
| P61313 | 60S ribosomal protein L15;Ribosomal protein L15                                                       | RPL15  | 11 | 51   | 0 | 166.2 | 0.67 | 0.70 | 0.67 | 0.75 | 0.66 | 0.81 | 0.81 | 0.78 | 0.78 |
| P61326 | Protein mago nashi homolog                                                                            | MAGOH  | 1  | 42.5 | 0 | 11.13 | 0.94 | 0.91 | 1.09 | 1.21 | 1.07 | 1.05 | 0.83 | 0.97 | 1.07 |
| P61353 | 60S ribosomal protein L27                                                                             | RPL27  | 6  | 50.7 | 0 | 7.782 | 0.80 | 0.71 | 0.78 | 0.88 | 0.81 | 0.79 | 0.93 | 0.93 | 0.86 |
| P61586 | Transforming protein RhoA                                                                             | RHOA   | 4  | 56.5 | 0 | 285.2 | 0.97 | 0.92 | 0.93 | 1.00 | 1.01 | 1.03 | 0.88 | 0.85 | 0.89 |
| P61604 | 10 kDa heat shock protein, mitochondrial                                                              | HSPE1  | 11 | 83.3 | 0 | 120.3 | 1.22 | 1.24 | 1.32 | 1.23 | 1.21 | 1.21 | 0.99 | 0.98 | 1.00 |
| P61758 | Prefoldin subunit 3                                                                                   | VBP1   | 8  | 43.7 | 0 | 5.424 | 0.77 | 0.91 | NaN  | 1.09 | NaN  | NaN  | 0.93 | 1.01 | 1.23 |
| P61769 | Beta-2-microglobulin;Beta-2-microglobulin form pI 5.3                                                 | B2M    | 4  | 37.8 | 0 | 80.95 | 0.97 | 1.02 | 0.99 | 1.09 | 1.18 | 1.08 | 0.93 | 1.01 | 0.98 |
| P61956 | Small ubiquitin-related modifier 2;Small ubiquitin-related modifier                                   | SUMO2  | 1  | 23.2 | 0 | 108.4 | 1.00 | 1.00 | 0.99 | 0.87 | 1.10 | 1.14 | 0.91 | 0.95 | 1.02 |
| P61970 | Nuclear transport factor 2                                                                            | NUTF2  | 5  | 62.2 | 0 | 32.49 | 1.43 | 1.18 | 1.48 | 1.54 | 1.89 | 1.45 | 1.22 | 1.29 | 1.06 |
| P61978 | Heterogeneous nuclear ribonucleoprotein K                                                             | HNRNPK | 4  | 61.6 | 0 | 323.3 | 0.89 | 0.90 | 0.92 | 0.92 | 0.95 | 0.95 | 0.88 | 0.91 | 0.99 |
| P61981 | 14-3-3 protein gamma;14-3-3 protein gamma, N-terminally processed                                     | YWHAG  | 13 | 72.5 | 0 | 323.3 | 1.14 | 1.20 | 1.13 | 1.09 | 1.15 | 1.09 | 1.08 | 1.01 | 1.05 |
| P62070 | Ras-related protein R-Ras2                                                                            | RRAS2  | 2  | 25   | 0 | 10.48 | 1.08 | 1.01 | 0.93 | 1.17 | 1.06 | 1.00 | 0.72 | 1.00 | 0.84 |
| P62081 | 40S ribosomal protein S7                                                                              | RPS7   | 3  | 60.3 | 0 | 323.3 | 0.99 | 0.93 | 0.94 | 0.83 | 0.96 | 0.89 | 0.96 | 0.93 | 1.06 |
| P62136 | Serine/threonine-protein phosphatase PP1-alpha catalytic subunit;Serine/threonine-protein phosphatase | PPP1CA | 6  | 73.6 | 0 | 319.7 | 1.17 | 1.03 | 1.09 | 1.20 | 1.16 | 1.02 | 1.12 | 1.26 | 1.17 |
| P62140 | Serine/threonine-protein phosphatase PP1-beta catalytic subunit;Serine/threonine-protein phosphatase  | PPP1CB | 5  | 63.3 | 0 | 59.66 | 0.93 | 1.09 | 1.14 | 1.07 | NaN  | 0.80 | NaN  | 1.12 | 1.12 |
| P62191 | 26S protease regulatory subunit                                                                       | PSMC1  | 15 | 45   | 0 | 133.6 | 1.04 | 1.04 | 1.03 | 0.99 | 1.12 | 1.13 | 1.09 | 0.95 | 0.86 |
| P62195 | 26S protease regulatory subunit                                                                       | PSMC5  | 14 | 47   | 0 | 182.3 | 1.06 | 0.95 | 1.08 | 0.85 | 0.96 | 1.11 | 0.93 | 1.10 | 0.86 |
| P62241 | 40S ribosomal protein S8                                                                              | RPS8   | 8  | 45.7 | 0 | 143.2 | 0.91 | 0.95 | 1.03 | 0.78 | 0.91 | 0.91 | 0.85 | 0.74 | 0.73 |
| P62244 | 40S ribosomal protein S15a                                                                            | RPS15A | 3  | 54.6 | 0 | 54.12 | 0.88 | 0.89 | 0.80 | 0.85 | 0.82 | 0.90 | 0.66 | 0.64 | 0.96 |
| P62249 | 40S ribosomal protein S16                                                                             | RPS16  | 8  | 50   | 0 | 23.09 | 0.51 | 0.61 | 0.74 | 0.87 | 0.73 | 0.72 | 0.48 | 0.31 | 0.65 |
| P62258 | 14-3-3 protein epsilon                                                                                | YWHAE  | 24 | 78.4 | 0 | 323.3 | 0.91 | 0.94 | 0.96 | 0.94 | 0.90 | 0.97 | 0.85 | 0.92 | 0.93 |
| P62266 | 40S ribosomal protein S23                                                                             | RPS23  | 6  | 43.4 | 0 | 24.33 | 0.64 | 0.64 | 0.66 | 0.62 | 0.56 | 0.67 | 0.57 | 0.79 | 0.73 |
| P62269 | 40S ribosomal protein S18                                                                             | RPS18  | 10 | 48.7 | 0 | 41.95 | 0.77 | 0.81 | 0.78 | 0.75 | 0.74 | 0.86 | 0.89 | 0.91 | 0.82 |
| P62277 | 40S ribosomal protein S13                                                                             | RPS13  | 10 | 57   | 0 | 58.17 | 0.80 | 0.75 | 0.72 | 0.62 | 0.72 | 0.83 | 0.57 | 0.82 | 0.75 |
| P62280 | 40S ribosomal protein S11                                                                             | RPS11  | 9  | 51.9 | 0 | 192.8 | 0.90 | 0.88 | 0.92 | 0.78 | 0.79 | 0.86 | 0.84 | 0.84 | 0.87 |

|        |                                                                                           |          |    |      |   |       |      |      |      |      |      |      |      |      |      |
|--------|-------------------------------------------------------------------------------------------|----------|----|------|---|-------|------|------|------|------|------|------|------|------|------|
| P62304 | Small nuclear ribonucleoprotein                                                           | SNRPE    | 2  | 25   | 0 | 14.2  | 0.80 | 0.79 | 0.88 | 1.06 | 0.92 | 0.95 | 0.67 | 0.69 | 0.70 |
| P62306 | Small nuclear ribonucleoprotein F                                                         | SNRPF    | 2  | 24.4 | 0 | 77.87 | 1.25 | 1.18 | 0.95 | 1.06 | 1.01 | 1.09 | 0.72 | 0.71 | 1.05 |
| P62310 | U6 snRNA-associated Sm-like protein LSM3                                                  | LSM3     | 2  | 32.4 | 0 | 135.4 | 1.24 | 1.06 | 1.37 | 1.07 | NaN  | 1.13 | NaN  | NaN  | 1.05 |
| P62314 | Small nuclear ribonucleoprotein Sm D1                                                     | SNRPD1   | 3  | 37   | 0 | 8.623 | 0.82 | 1.01 | 0.75 | 0.76 | 4.06 | 1.26 | 0.67 | 0.90 | 1.27 |
| P62316 | Small nuclear ribonucleoprotein Sm D2                                                     | SNRPD2   | 8  | 61.9 | 0 | 97.68 | 0.75 | 0.91 | 0.93 | 0.84 | 0.92 | 0.99 | 0.71 | 0.89 | 0.85 |
| P62318 | Small nuclear ribonucleoprotein Sm D3                                                     | SNRPD3   | 5  | 53.2 | 0 | 23.21 | 0.75 | 0.78 | 0.90 | 1.09 | 0.92 | 0.92 | 0.81 | 0.74 | 0.76 |
| P62328 | Thymosin beta-4;Hematopoietic system regulatory peptide                                   | TMSB4X   | 11 | 88.6 | 0 | 323.3 | 0.97 | 0.96 | 0.95 | 1.03 | 1.00 | 1.01 | 0.91 | 0.86 | 0.90 |
| P62330 | ADP-ribosylation factor 6                                                                 | ARF6     | 5  | 48.6 | 0 | 60.36 | 1.01 | 0.73 | 0.88 | 0.71 | 1.09 | 0.84 | 0.57 | 0.87 | 0.72 |
| P62424 | 60S ribosomal protein L7a                                                                 | RPL7A    | 12 | 37.6 | 0 | 195.1 | 0.77 | 0.77 | 0.73 | 0.78 | 0.83 | 0.81 | 0.74 | 0.71 | 0.69 |
| P62633 | Cellular nucleic acid-binding protein                                                     | CNBP     | 6  | 40.1 | 0 | 82.73 | 0.95 | 0.78 | 0.89 | 1.03 | 0.87 | 0.88 | 1.00 | 0.98 | 1.06 |
| P62701 | 40S ribosomal protein S4, X isoform                                                       | RPS4X    | 18 | 63.5 | 0 | 238.5 | 0.81 | 0.68 | 0.83 | 0.69 | 0.73 | 0.71 | 0.69 | 0.65 | 0.75 |
| P62750 | 60S ribosomal protein L23a                                                                | RPL23A   | 9  | 42.3 | 0 | 8.203 | 0.85 | 0.87 | 0.95 | 0.80 | 0.88 | 0.83 | 0.87 | 0.87 | 0.95 |
| P62753 | 40S ribosomal protein S6                                                                  | RPS6     | 6  | 27.3 | 0 | 110   | 1.02 | 1.16 | 1.09 | 0.97 | 1.02 | 0.91 | 0.80 | 0.91 | 1.16 |
| P62805 | Histone H4                                                                                | HIST1H4A | 9  | 59.2 | 0 | 135.4 | 0.84 | 0.84 | 0.83 | 0.65 | 0.66 | 0.66 | 0.90 | 0.86 | 0.91 |
| P62820 | Ras-related protein Rab-1A                                                                | RAB1A    | 7  | 78.5 | 0 | 194.3 | 1.04 | 0.94 | 0.97 | 0.93 | 0.97 | 1.02 | 0.92 | 0.89 | 0.96 |
| P62829 | 60S ribosomal protein L23                                                                 | RPL23    | 7  | 52.1 | 0 | 101   | 0.72 | 0.73 | 0.66 | 0.72 | 0.83 | 0.77 | 0.82 | 0.91 | 0.90 |
| P62841 | 40S ribosomal protein S15                                                                 | RPS15    | 6  | 54.5 | 0 | 124.1 | 0.76 | 0.88 | 0.78 | 0.82 | 0.80 | 0.96 | 0.66 | 0.50 | 0.71 |
| P62851 | 40S ribosomal protein S25                                                                 | RPS25    | 6  | 37.6 | 0 | 12.05 | 0.87 | 0.85 | 0.86 | 0.84 | 0.77 | 0.86 | 0.82 | 0.85 | 0.91 |
| P62854 | 40S ribosomal protein S26;Putative 40S ribosomal protein S26-like 1                       | RPS26    | 4  | 44.3 | 0 | 17.45 | 0.50 | 0.74 | 0.86 | 0.78 | 0.88 | 0.76 | 0.58 | 0.54 | NaN  |
| P62857 | 40S ribosomal protein S28                                                                 | RPS28    | 3  | 46.4 | 0 | 323.3 | 1.13 | 1.20 | 1.03 | 1.12 | 1.11 | 1.21 | 1.09 | 1.05 | 0.88 |
| P62873 | Guanine nucleotide-binding protein G(I)/G(S)/G(T) subunit beta-1                          | GNB1     | 9  | 50   | 0 | 240   | 0.88 | 0.73 | 0.83 | 0.72 | 0.88 | 0.96 | 0.81 | 0.88 | 0.72 |
| P62877 | E3 ubiquitin-protein ligase RBX1;E3 ubiquitin-protein ligase RBX1, N-terminally processed | RBX1     | 3  | 29.6 | 0 | 40.71 | NaN  | 1.12 | 0.93 | NaN  | NaN  | 1.03 | NaN  | NaN  | 0.84 |
| P62879 | Guanine nucleotide-binding protein G(I)/G(S)/G(T) subunit beta-2                          | GNB2     | 5  | 50   | 0 | 151.4 | 0.86 | 0.85 | 1.02 | NaN  | 0.96 | 0.96 | 0.44 | 1.39 | 0.79 |
| P62888 | 60S ribosomal protein L30                                                                 | RPL30    | 6  | 66.1 | 0 | 109.7 | 1.04 | 0.89 | 0.93 | 1.03 | 1.08 | 0.90 | 1.03 | 1.08 | 0.99 |
| Q59GN2 | Putative 60S ribosomal protein L39-like 5;60S ribosomal protein L39                       | RPL39P5  | 1  | 19.6 | 0 | 3.923 | 1.33 | 1.33 | 1.36 | NaN  | 0.98 | 1.15 | NaN  | NaN  | 1.48 |
| P62899 | 60S ribosomal protein L31                                                                 | RPL31    | 5  | 40   | 0 | 91.88 | 0.78 | 0.91 | NaN  | 0.78 | 0.69 | 0.76 | 0.87 | 0.91 | 0.75 |
| P62906 | 60S ribosomal protein L10a                                                                | RPL10A   | 12 | 48.4 | 0 | 53.56 | 0.87 | 0.82 | 0.90 | 0.88 | 0.74 | 0.80 | 0.72 | 0.90 | 1.01 |
| Q5VVC8 | 60S ribosomal protein L11                                                                 | RPL11    | 4  | 22.2 | 0 | 80.59 | 0.78 | 0.75 | 0.76 | 0.81 | 0.82 | NaN  | 0.92 | 0.88 | 0.86 |

|        |                                                                                                                                           |        |    |      |   |       |      |      |      |      |      |      |      |      |      |
|--------|-------------------------------------------------------------------------------------------------------------------------------------------|--------|----|------|---|-------|------|------|------|------|------|------|------|------|------|
| P62937 | Peptidyl-prolyl cis-trans isomerase A;Peptidyl-prolyl cis-trans isomerase A, N-terminally processed;Peptidyl-prolyl cis-trans isomerase   | PPIA   | 11 | 78.8 | 0 | 323.3 | 1.08 | 1.14 | 1.10 | 1.20 | 1.14 | 1.14 | 1.07 | 1.08 | 1.13 |
| P62942 | Peptidyl-prolyl cis-trans isomerase FKBP1A;Peptidyl-prolyl cis-trans isomerase                                                            | FKBP1A | 7  | 73.1 | 0 | 184.9 | 0.99 | 1.10 | 1.18 | 1.69 | 1.14 | 1.17 | 1.39 | 1.42 | 0.93 |
| P62979 | Ubiquitin-40S ribosomal protein S27a;Ubiquitin;40S ribosomal protein S27a;Polyubiquitin-B;Ubiquitin;Polyubiquitin-C;Ubiquitin             | RPS27A | 3  | 57.1 | 0 | 323.3 | 0.93 | 1.06 | 1.25 | 0.81 | 0.81 | 0.90 | 0.98 | 0.90 | 1.14 |
| P62993 | Growth factor receptor-bound protein 2                                                                                                    | GRB2   | 7  | 41.5 | 0 | 16.31 | NaN  | 1.44 | 1.72 | 1.16 | NaN  | 1.16 | 1.02 | NaN  | 0.98 |
| P62995 | Transformer-2 protein homolog beta                                                                                                        | TRA2B  | 7  | 28.1 | 0 | 18.21 | 0.97 | 0.97 | 0.96 | NaN  | 1.24 | 1.14 | NaN  | NaN  | 0.90 |
| P63000 | Ras-related C3 botulinum toxin substrate 1                                                                                                | RAC1   | 4  | 41.1 | 0 | 52.44 | 0.96 | 0.98 | 0.96 | 1.01 | 1.05 | 0.97 | 0.71 | 0.80 | 0.85 |
| P63010 | AP-2 complex subunit beta                                                                                                                 | AP2B1  | 18 | 39.8 | 0 | 207.7 | 1.12 | 1.00 | 1.01 | 0.87 | 0.94 | 0.95 | 0.95 | 0.97 | 1.03 |
| P63092 | Guanine nucleotide-binding protein G(s) subunit alpha isoforms short;Guanine nucleotide-binding protein G(s) subunit alpha isoforms XI as | GNAS   | 4  | 17.5 | 0 | 27    | 1.40 | 0.89 | 1.00 | NaN  | 1.04 | NaN  | NaN  | 1.64 | 1.14 |
| P63104 | 14-3-3 protein zeta/delta                                                                                                                 | YWHAZ  | 16 | 75.9 | 0 | 323.3 | 0.97 | 0.93 | 0.92 | 0.95 | 0.93 | 0.92 | 0.90 | 0.93 | 0.96 |
| P63167 | Dynein light chain 1, cytoplasmic                                                                                                         | DYNLL1 | 3  | 58.4 | 0 | 311.6 | 0.70 | 0.82 | 0.77 | 0.87 | 0.96 | 0.75 | 0.44 | 0.89 | 0.91 |
| P63172 | Dynein light chain Tctex-type 1                                                                                                           | DYNLT1 | 3  | 38.9 | 0 | 40.08 | 0.76 | 1.28 | 0.75 | 0.80 | NaN  | 0.75 | 0.80 | NaN  | 0.76 |
| P63173 | 60S ribosomal protein L38                                                                                                                 | RPL38  | 4  | 50   | 0 | 6.379 | 0.59 | 0.56 | 0.77 | NaN  | NaN  | 0.48 | 0.61 | 0.63 | 0.71 |
| Q8WVC2 | 40S ribosomal protein S21                                                                                                                 | RPS21  | 6  | 74.1 | 0 | 105.1 | 0.96 | 0.97 | 1.04 | 0.95 | 0.98 | 1.05 | NaN  | 0.99 | 0.80 |
| P63244 | Guanine nucleotide-binding protein subunit beta-2-like 1;Guanine nucleotide-binding protein subunit beta-2-like 1, N-terminally processed | GNB2L1 | 20 | 79.5 | 0 | 193.2 | 0.98 | 0.94 | 0.91 | 0.87 | 1.00 | 0.81 | 0.95 | 0.92 | 0.95 |
| P63261 | Actin, cytoplasmic 2;Actin, cytoplasmic 2, N-terminally processed                                                                         | ACTG1  | 3  | 80.5 | 0 | 323.3 | 0.98 | 0.96 | 0.98 | 0.95 | 0.95 | 0.94 | 1.05 | 1.03 | 1.06 |
| P63313 | Thymosin beta-10 Serine/threonine-protein phosphatase 2A catalytic subunit                                                                | TMSB10 | 3  | 54.5 | 0 | 90.42 | 0.58 | 0.69 | 0.77 | 0.94 | 1.02 | 1.08 | NaN  | NaN  | 0.80 |
| P67775 | alpha isoform;Serine/threonine-protein phosphatase 2A catalytic subunit beta isoform                                                      | PPP2CA | 9  | 53.1 | 0 | 131.7 | 1.13 | 1.21 | 1.20 | 0.90 | 1.13 | 1.16 | 1.15 | 0.90 | 0.98 |
| P67809 | Nuclease-sensitive element-binding protein 1                                                                                              | YBX1   | 10 | 54   | 0 | 323.3 | 1.25 | 1.22 | 1.19 | 1.11 | 1.09 | 1.09 | 0.98 | 1.03 | 1.01 |
| Q5SRQ6 | Casein kinase II subunit beta                                                                                                             | CSNK2B | 6  | 38   | 0 | 8.063 | 1.77 | 1.25 | 1.43 | NaN  | 0.86 | 0.90 | NaN  | 3.09 | 1.11 |

|        |                                                                                                                        |          |    |      |       |       |      |      |      |      |      |      |      |      |      |
|--------|------------------------------------------------------------------------------------------------------------------------|----------|----|------|-------|-------|------|------|------|------|------|------|------|------|------|
| P67936 | Tropomyosin alpha-4 chain<br>Actin, alpha cardiac muscle                                                               | TPM4     | 8  | 73   | 0     | 323.3 | 1.20 | 1.11 | 1.08 | 0.94 | 0.97 | 0.93 | 1.19 | 1.11 | 1.16 |
| P68032 | 1;Actin, gamma-enteric smooth<br>muscle;Actin, alpha skeletal<br>muscle;Actin, aortic smooth                           | ACTC1    | 4  | 45.6 | 0     | 22.92 | 0.91 | NaN  | NaN  | 0.91 | NaN  | 0.99 | 0.62 | 0.64 | 0.84 |
| P68036 | Ubiquitin-conjugating enzyme E2<br>L3<br>Elongation factor 1-alpha                                                     | UBE2L3   | 7  | 63.6 | 0     | 173.7 | 1.01 | 1.18 | 1.09 | 1.13 | 1.11 | 1.09 | 1.16 | 1.34 | 0.96 |
| P68104 | 1;Putative elongation factor 1-<br>alpha-like 3;Elongation factor 1-<br>alpha                                          | EEF1A1   | 17 | 74.9 | 0     | 323.3 | 0.82 | 0.79 | 0.82 | 0.94 | 0.90 | 0.92 | 0.77 | 0.87 | 0.85 |
| P68363 | Tubulin alpha-1B chain                                                                                                 | TUBA1B   | 0  | 80.7 | 0     | 323.3 | 0.67 | 0.61 | 0.60 | 0.67 | 0.71 | 0.69 | 1.03 | 0.87 | 0.89 |
| P68366 | Tubulin alpha-4A chain                                                                                                 | TUBA4A   | 3  | 56.5 | 0     | 17.53 | 1.00 | 0.99 | 1.23 | NaN  | 1.01 | 0.97 | NaN  | 1.95 | 2.09 |
| P68371 | Tubulin beta-4B chain                                                                                                  | TUBB4B   | 1  | 67   | 0     | 323.3 | 0.55 | 0.52 | 0.53 | 0.61 | 0.61 | 0.60 | 0.94 | 0.86 | 0.87 |
| P68402 | Platelet-activating factor<br>acetylhydrolase IB subunit beta                                                          | PAFAH1B2 | 8  | 58.1 | 0     | 143.5 | 1.11 | 1.01 | 0.96 | 1.01 | 1.07 | 1.04 | 1.08 | 1.04 | 1.10 |
| Q71DI3 | Histone H3.2;Histone<br>H3.1t;Histone H3.1;Histone H3                                                                  | HIST2H3A | 3  | 39.7 | 0     | 45.61 | 0.79 | 0.77 | 0.76 | 0.67 | 0.67 | 0.63 | 0.88 | 0.82 | 0.68 |
| P78318 | Immunoglobulin-binding protein 1                                                                                       | IGBP1    | 3  | 11.5 | 0     | 48.45 | NaN  | 0.72 | 1.12 | NaN  | NaN  | 1.26 | NaN  | 0.87 | 1.26 |
| P78344 | Eukaryotic translation initiation<br>factor 4 gamma 2                                                                  | EIF4G2   | 10 | 14.6 | 0     | 25.93 | 1.06 | 0.99 | 1.21 | 1.21 | 1.02 | 0.89 | 1.02 | 0.81 | 1.01 |
| P78346 | Ribonuclease P protein subunit<br>p30                                                                                  | RPP30    | 2  | 9.7  | 0.002 | 1.9   | 0.99 | 1.00 | 1.12 | NaN  | 0.85 | 1.01 | NaN  | NaN  | NaN  |
| P78371 | T-complex protein 1 subunit beta                                                                                       | CCT2     | 35 | 80   | 0     | 323.3 | 1.07 | 1.06 | 1.06 | 1.01 | 1.00 | 1.06 | 0.96 | 1.08 | 0.97 |
| P78417 | Glutathione S-transferase<br>omega-1                                                                                   | GSTO1    | 20 | 66.4 | 0     | 227.5 | 1.22 | 1.17 | 1.22 | 1.22 | 1.17 | 1.21 | 1.08 | 1.01 | 1.16 |
| P78527 | DNA-dependent protein kinase<br>catalytic subunit                                                                      | PRKDC    | 69 | 20.6 | 0     | 226.7 | 0.88 | 0.76 | 0.79 | 1.06 | 0.90 | 0.91 | 0.90 | 1.01 | 0.94 |
| P80723 | Brain acid soluble protein 1                                                                                           | BASP1    | 14 | 89.9 | 0     | 323.3 | 0.93 | 0.98 | 0.95 | 0.90 | 0.88 | 0.91 | 1.02 | 1.09 | 1.15 |
| P82673 | 28S ribosomal protein S35,<br>mitochondrial                                                                            | MRPS35   | 3  | 11.1 | 0     | 3.985 | 0.69 | 0.54 | 0.56 | NaN  | 1.16 | 0.49 | NaN  | NaN  | NaN  |
| P83111 | Serine beta-lactamase-like<br>protein LACTB, mitochondrial                                                             | LACTB    | 4  | 10.6 | 0     | 7.36  | 1.05 | 1.02 | 0.97 | NaN  | NaN  | 0.91 | NaN  | NaN  | NaN  |
| P83916 | Chromobox protein homolog 1<br>Mothers against decapentaplegic<br>homolog 3;Mothers against<br>decapentaplegic homolog | CBX1     | 5  | 55.7 | 0     | 51.41 | NaN  | 0.55 | NaN  | 0.70 | NaN  | 0.58 | 0.72 | 0.81 | 0.72 |
| P84022 | 2;Mothers against<br>ADP-ribosylation factor 1;ADP-<br>ribosylation factor 3                                           | SMAD3    | 3  | 8    | 0     | 3.479 | 0.48 | NaN  | NaN  | 0.55 | NaN  | 0.72 | NaN  | NaN  | NaN  |
| P84077 | Enhancer of rudimentary                                                                                                | ARF1     | 4  | 59.7 | 0     | 60.34 | 0.75 | 0.77 | 0.88 | 1.03 | 0.95 | 0.92 | 0.66 | 0.71 | 0.67 |
| P84090 | Rho-related GTP-binding protein                                                                                        | ERH      | 5  | 51   | 0     | 323.3 | 0.95 | 1.10 | 1.03 | 1.13 | 0.87 | 1.01 | 0.91 | 0.98 | 1.35 |
| P84095 | RhoG                                                                                                                   | RHOG     | 6  | 47.6 | 0     | 14.04 | 1.17 | 1.01 | 1.13 | 0.69 | NaN  | 1.19 | 4.43 | 5.19 | 1.01 |
| P84103 | Serine/arginine-rich splicing<br>factor 3                                                                              | SRSF3    | 8  | 47   | 0     | 23.35 | 1.06 | 1.08 | 1.04 | 1.01 | 0.96 | 0.96 | 1.18 | 1.07 | 1.16 |

|        |                                                                                                             |        |    |      |   |       |      |      |      |      |      |      |      |      |      |
|--------|-------------------------------------------------------------------------------------------------------------|--------|----|------|---|-------|------|------|------|------|------|------|------|------|------|
| P98179 | RNA-binding protein 3                                                                                       | RBM3   | 4  | 47.8 | 0 | 323.3 | 0.80 | 0.75 | 0.80 | 0.94 | 0.85 | 0.92 | 0.81 | 0.85 | 0.88 |
| Q00688 | Peptidyl-prolyl cis-trans isomerase FKBP3                                                                   | FKBP3  | 11 | 52.7 | 0 | 47.91 | 0.81 | 1.06 | NaN  | 1.19 | 1.11 | 1.15 | NaN  | 3.06 | 1.01 |
| Q00765 | Receptor expression-enhancing protein 5                                                                     | REEP5  | 5  | 20.1 | 0 | 4.783 | 1.20 | 1.15 | 1.04 | 1.23 | NaN  | 1.27 | 1.06 | 0.94 | 0.90 |
| Q00839 | Heterogeneous nuclear ribonucleoprotein U                                                                   | HNRNPU | 4  | 41.9 | 0 | 323.3 | 0.73 | 0.80 | 0.76 | 0.80 | 0.82 | 0.86 | 0.80 | 0.86 | 0.87 |
| Q01082 | Spectrin beta chain, non-erythrocytic 1                                                                     | SPTBN1 | 3  | 60.5 | 0 | 323.3 | 0.72 | 0.73 | 0.74 | 0.77 | 0.76 | 0.77 | 0.92 | 0.92 | 0.92 |
| Q01085 | Nucleolysin TIAR                                                                                            | TIAL1  | 4  | 11.7 | 0 | 11.16 | 0.95 | NaN  | 1.10 | NaN  | 0.78 | NaN  | NaN  | NaN  | NaN  |
| Q01518 | Adenylyl cyclase-associated protein 1                                                                       | CAP1   | 23 | 60.2 | 0 | 323.3 | 1.06 | 1.06 | 1.05 | 1.07 | 1.01 | 1.06 | 1.04 | 1.03 | 1.01 |
| Q01650 | Large neutral amino acids transporter small subunit 1                                                       | SLC7A5 | 3  | 9.5  | 0 | 89.18 | 1.58 | 0.90 | 0.94 | 0.88 | 1.18 | 0.71 | 1.00 | 1.01 | 1.74 |
| Q01813 | ATP-dependent 6-phosphofructokinase, platelet                                                               | PFKP   | 33 | 56.1 | 0 | 323.3 | 0.97 | 0.98 | 0.96 | 1.02 | 1.01 | 1.05 | 0.98 | 1.08 | 1.03 |
| Q01970 | 1-phosphatidylinositol 4,5-bisphosphate phosphodiesterase beta-3                                            | PLCB3  | 7  | 8.1  | 0 | 11.51 | NaN  | NaN  | 0.95 | 0.42 | 0.92 | NaN  | 0.85 | 0.86 | NaN  |
| Q02790 | Peptidyl-prolyl cis-trans isomerase FKBP4;Peptidyl-prolyl cis-trans isomerase FKBP4, N-terminally processed | FKBP4  | 15 | 46   | 0 | 70.57 | 0.81 | 0.83 | 1.21 | 1.09 | 1.07 | 1.17 | 0.69 | 0.84 | 0.51 |
| Q02809 | Procollagen-lysine,2-oxoglutarate 5-dioxygenase 1                                                           | PLOD1  | 11 | 22.3 | 0 | 14.53 | 0.58 | 0.70 | 0.68 | NaN  | 0.62 | NaN  | NaN  | 1.06 | 1.12 |
| Q02878 | 60S ribosomal protein L6                                                                                    | RPL6   | 13 | 45.1 | 0 | 139.6 | 0.99 | 1.00 | 0.96 | 0.99 | 0.97 | 0.97 | 0.99 | 0.95 | 0.98 |
| Q03135 | Caveolin-1;Caveolin                                                                                         | CAV1   | 3  | 39.9 | 0 | 167.3 | 1.08 | 1.11 | 1.08 | 1.15 | 1.01 | 1.17 | 0.86 | 0.89 | 0.90 |
| Q03252 | Lamin-B2                                                                                                    | LMNB2  | 19 | 35.3 | 0 | 112.4 | 1.07 | 1.10 | 1.45 | 1.11 | 1.10 | 1.26 | 1.29 | 1.11 | 1.21 |
| Q04446 | 1,4-alpha-glucan-branching enzyme                                                                           | GBE1   | 17 | 32.1 | 0 | 126.4 | 1.09 | 1.09 | 0.95 | 0.96 | 1.36 | 1.59 | 1.00 | 0.85 | 1.04 |
| Q04760 | Lactoylglutathione lyase                                                                                    | GLO1   | 11 | 66.3 | 0 | 279.5 | 0.85 | 0.82 | 0.92 | 0.94 | 0.95 | 0.93 | 0.82 | 0.84 | 0.80 |
| Q04837 | Single-stranded DNA-binding protein, mitochondrial                                                          | SSBP1  | 6  | 47.3 | 0 | 113   | 1.13 | 1.17 | 1.22 | 1.37 | 1.15 | 1.16 | 0.73 | 0.74 | 0.81 |
| Q04917 | 14-3-3 protein eta                                                                                          | YWHAH  | 13 | 61.4 | 0 | 323.3 | 0.77 | 0.86 | 0.90 | 0.85 | 0.87 | 0.94 | 0.80 | 0.83 | 0.84 |
| Q04941 | Proteolipid protein 2                                                                                       | PLP2   | 2  | 18.4 | 0 | 31.59 | 1.16 | 1.20 | 1.23 | 1.00 | 1.03 | 1.02 | 0.71 | 0.88 | 1.11 |
| Q5T760 | Serine/arginine-rich splicing factor 11                                                                     | SRSF11 | 2  | 6.4  | 0 | 7.365 | 1.11 | 1.03 | 1.13 | 1.03 | 1.05 | 1.11 | 0.52 | 0.75 | 1.08 |
| Q06124 | Tyrosine-protein phosphatase non-receptor type 11                                                           | PTPN11 | 5  | 14.4 | 0 | 26.15 | 1.10 | 0.90 | 0.93 | NaN  | NaN  | 1.41 | NaN  | NaN  | NaN  |
| Q06210 | Glutamine--fructose-6-phosphate aminotransferase [isomerizing] 1                                            | GFPT1  | 19 | 37.1 | 0 | 175.3 | 0.76 | 0.94 | 0.97 | 0.84 | 0.88 | 0.85 | 0.92 | 0.93 | 1.07 |
| Q06323 | Proteasome activator complex subunit 1                                                                      | PSME1  | 17 | 67.5 | 0 | 126.8 | 1.17 | 1.12 | 1.04 | 1.12 | 1.10 | 1.20 | 1.17 | 1.14 | 1.16 |
| Q06481 | Amyloid-like protein 2                                                                                      | APLP2  | 2  | 3.7  | 0 | 21.22 | NaN  | 1.19 | 0.53 | NaN  | 1.06 | NaN  | NaN  | NaN  | NaN  |
| Q06830 | Peroxiredoxin-1                                                                                             | PRDX1  | 15 | 77.4 | 0 | 323.3 | 0.96 | 0.95 | 0.98 | 1.03 | 1.02 | 1.02 | 0.98 | 0.94 | 0.95 |





|        |                                                                       |         |    |      |       |       |      |      |      |      |      |      |      |      |      |     |
|--------|-----------------------------------------------------------------------|---------|----|------|-------|-------|------|------|------|------|------|------|------|------|------|-----|
| Q13011 | Delta(3,5)-Delta(2,4)-dienoyl-CoA isomerase, mitochondrial            | ECH1    | 6  | 36   | 0     | 34.88 | 0.99 | 1.06 | 1.10 | 0.90 | 1.00 | 1.12 | NaN  | 1.01 | 1.13 |     |
| Q13045 | Protein flightless-1 homolog                                          | FLII    | 8  | 9.2  | 0     | 18.21 | 1.13 | 1.20 | 1.18 | 1.04 | 0.97 | 0.71 | 2.09 | 2.31 | 1.24 |     |
| Q13148 | TAR DNA-binding protein 43                                            | TARDBP  | 9  | 36.2 | 0     | 45.36 | 0.78 | 0.81 | 0.99 | 1.14 | 1.03 | 1.08 | NaN  | NaN  | 0.97 |     |
| Q13151 | Heterogeneous nuclear ribonucleoprotein A0                            | HNRNPA0 | 6  | 28.2 | 0     | 50.73 | 0.84 | 0.82 | 0.66 | 0.95 | 0.62 | 0.92 | 1.03 | 1.06 | 1.09 |     |
| Q13155 | Aminoacyl tRNA synthase complex-interacting multifunctional protein 2 | AIMP2   | 7  | 28.8 | 0     | 45.71 | NaN  | 0.82 | 1.32 | NaN  | 0.87 | 1.20 | NaN  | NaN  | 0.96 |     |
| Q13158 | FAS-associated death domain protein                                   | FADD    | 1  | 8.7  | 0     | 3.118 | 1.09 | 1.15 | 1.13 | 1.51 | 1.26 | 1.40 | NaN  | 2.37 | 0.91 |     |
| Q13162 | Peroxiredoxin-4                                                       | PRDX4   | 9  | 53.9 | 0     | 85.96 | 1.01 | 0.97 | 0.98 | 1.03 | 1.07 | 1.09 | 1.18 | 1.09 | 1.09 |     |
| Q13177 | Serine/threonine-protein kinase PAK 2;PAK-2p27;PAK-2p34               | PAK2    | 19 | 53.8 | 0     | 237.5 | 1.06 | 1.03 | 0.89 | 1.08 | 0.97 | 0.95 | 0.85 | 0.96 | 0.84 |     |
| Q13185 | Chromobox protein homolog 3                                           | CBX3    | 5  | 58.5 | 0     | 309.9 | 0.86 | 0.80 | 0.81 | 1.06 | 0.89 | 0.86 | 1.05 | 0.81 | 0.77 |     |
| Q13200 | 26S proteasome non-ATPase regulatory subunit 2                        | PSMD2   | 31 | 44.9 | 0     | 260.8 | 1.15 | 1.21 | 1.39 | 1.04 | 1.07 | 1.02 | 1.09 | 1.18 | 1.06 |     |
| Q13242 | Serine/arginine-rich splicing factor 9                                | SRSF9   | 5  | 23.5 | 0     | 31.28 | 1.61 | 1.10 | 1.02 | 1.07 | 1.26 | 0.89 | 1.60 | 1.07 | 1.40 |     |
| Q13243 | Serine/arginine-rich splicing factor 5                                | SRSF5   | 2  | 12.9 | 0.002 | 1.893 | NaN  | NaN  | NaN  | NaN  | NaN  | NaN  | NaN  | 1.34 | 1.22 | NaN |
| Q13247 | Serine/arginine-rich splicing factor 6                                | SRSF6   | 2  | 18   | 1E-03 | 2.154 | 2.23 | 2.57 | 2.12 | NaN  | 1.01 | NaN  | NaN  | NaN  | 2.10 |     |
| Q13263 | Transcription intermediary factor 1-beta                              | TRIM28  | 16 | 33.4 | 0     | 127.3 | 1.02 | 1.08 | 1.00 | 0.90 | 1.01 | 1.12 | 0.69 | 0.76 | 0.92 |     |
| Q13283 | Ras GTPase-activating protein-binding protein 1                       | G3BP1   | 13 | 46.6 | 0     | 148.4 | 1.38 | 1.23 | 1.23 | 0.98 | 0.92 | 1.03 | 0.90 | 1.06 | 1.04 |     |
| Q13347 | Eukaryotic translation initiation factor 3 subunit I                  | EIF3I   | 10 | 55.4 | 0     | 172.7 | 1.08 | 1.00 | 1.01 | 1.24 | 1.01 | 1.02 | 1.39 | 1.00 | 0.91 |     |
| Q13404 | Ubiquitin-conjugating enzyme E2 variant 1                             | UBE2V1  | 6  | 58.5 | 0     | 46.56 | 1.19 | 1.12 | 1.19 | 1.02 | 1.04 | 1.12 | 1.02 | 1.02 | 1.05 |     |
| Q13409 | Cytoplasmic dynein 1 intermediate chain 2                             | DYNC1I2 | 6  | 31.2 | 0     | 323.3 | 0.89 | 1.04 | 0.68 | 0.82 | 0.67 | 0.82 | 0.83 | 0.90 | 1.06 |     |
| Q13423 | NAD(P) transhydrogenase, mitochondrial                                | NNT     | 15 | 18.8 | 0     | 98.23 | 0.90 | 0.86 | 0.80 | 0.83 | 0.74 | 0.93 | 0.90 | 0.79 | 0.90 |     |
| Q13435 | Splicing factor 3B subunit 2                                          | SF3B2   | 18 | 25.7 | 0     | 91.05 | 1.21 | 0.73 | 0.90 | 1.05 | 1.02 | 1.04 | 1.07 | 0.95 | 0.68 |     |
| Q13442 | 28 kDa heat- and acid-stable phosphoprotein                           | PDAP1   | 10 | 38.7 | 0     | 178.3 | 0.99 | 0.96 | 0.99 | 1.01 | 1.14 | 0.97 | 0.80 | 0.89 | 0.96 |     |
| Q13492 | Phosphatidylinositol-binding clathrin assembly protein                | PICALM  | 7  | 16.4 | 0     | 25.95 | 1.07 | 0.94 | 0.90 | 1.07 | 1.19 | 0.89 | 1.56 | 1.08 | 0.69 |     |
| Q13501 | Sequestosome-1                                                        | SQSTM1  | 10 | 38.9 | 0     | 254.7 | 1.22 | 1.35 | 1.30 | 1.63 | 1.41 | 1.42 | NaN  | NaN  | 0.81 |     |
| Q13526 | Peptidyl-prolyl cis-trans isomerase NIMA-interacting 1                | PIN1    | 5  | 55.8 | 0     | 12.33 | 0.67 | 0.64 | 0.71 | 0.82 | 0.94 | 0.68 | 0.78 | 0.89 | 0.66 |     |
| Q13547 | Histone deacetylase 1                                                 | HDAC1   | 4  | 19.9 | 0     | 8.918 | 0.27 | 0.79 | 0.66 | 0.87 | 0.94 | 0.97 | NaN  | NaN  | 0.81 |     |
| Q13561 | Dynactin subunit 2                                                    | DCTN2   | 13 | 47.1 | 0     | 194.5 | 0.90 | 0.95 | 0.95 | 1.05 | 0.95 | 0.98 | 0.96 | 1.12 | 1.04 |     |
| Q13564 | NEDD8-activating enzyme E1 regulatory subunit                         | NAE1    | 5  | 14   | 0     | 17.11 | NaN  | 0.76 | NaN  | NaN  | NaN  | 0.79 | 0.96 | 1.14 | NaN  |     |

|        |                                                                                               |         |     |      |       |       |      |      |      |      |      |      |      |      |      |
|--------|-----------------------------------------------------------------------------------------------|---------|-----|------|-------|-------|------|------|------|------|------|------|------|------|------|
| Q13573 | SNW domain-containing protein                                                                 | SNW1    | 4   | 15.1 | 0     | 5.545 | 0.84 | NaN  | 0.67 | NaN  | NaN  | NaN  | NaN  | NaN  | NaN  |
| Q13596 | Sorting nexin-1                                                                               | SNX1    | 4   | 13.6 | 0     | 45.19 | 1.10 | 1.02 | 1.21 | 0.92 | 0.86 | 1.00 | 0.77 | 1.18 | 1.20 |
| Q13630 | GDP-L-fucose synthase                                                                         | TSTA3   | 4   | 15.3 | 0     | 6.267 | NaN  | 0.88 | 1.21 | NaN  | 0.79 | 0.91 | NaN  | 1.44 | 1.29 |
| Q13813 | Spectrin alpha chain, non-erythrocytic 1                                                      | SPTAN1  | 3   | 66   | 0     | 323.3 | 0.74 | 0.75 | 0.77 | 0.79 | 0.82 | 0.78 | 0.93 | 0.92 | 0.94 |
| Q13838 | Spliceosome RNA helicase DDX39B                                                               | DDX39B  | 7   | 53.3 | 0     | 323.3 | 0.90 | 0.86 | 0.89 | 0.81 | 0.89 | 0.90 | 0.95 | 0.86 | 0.96 |
| Q9BVA1 | Tubulin beta-2B chain;Tubulin beta-2A chain                                                   | TUBB2B  | 3   | 57.8 | 0     | 16.04 | 0.72 | 0.56 | 0.59 | 0.75 | 0.65 | 0.74 | NaN  | NaN  | 0.82 |
| Q13907 | Isopentenyl-diphosphate Delta-isomerase 1                                                     | IDI1    | 6   | 45.8 | 0     | 21.18 | 0.67 | NaN  | 0.53 | NaN  | 1.47 | NaN  | NaN  | NaN  | NaN  |
| Q14008 | Cytoskeleton-associated protein                                                               | CKAP5   | 18  | 11.2 | 0     | 29.52 | 1.01 | 1.10 | 0.91 | 0.94 | 1.02 | 1.22 | NaN  | 0.56 | 1.13 |
| Q14011 | Cold-inducible RNA-binding protein                                                            | CIRBP   | 3   | 26.7 | 0     | 47.97 | 2.31 | 1.57 | 0.62 | NaN  | NaN  | 1.05 | NaN  | NaN  | 1.48 |
| Q14019 | Coactosin-like protein                                                                        | COTL1   | 11  | 66.2 | 0     | 167.5 | 1.08 | 1.04 | 1.04 | 1.00 | 0.99 | 1.00 | 1.01 | 1.00 | 0.99 |
| Q14103 | Heterogeneous nuclear ribonucleoprotein D0                                                    | HNRNPD  | 3   | 39.7 | 0     | 323.3 | 0.91 | 0.92 | 0.86 | 0.91 | 0.90 | 0.91 | 0.77 | 0.82 | 0.86 |
| Q14152 | Eukaryotic translation initiation factor 3 subunit A                                          | EIF3A   | 44  | 36.2 | 0     | 289.6 | 1.08 | 1.26 | 1.26 | 1.26 | 1.20 | 1.18 | 0.88 | 0.86 | 0.98 |
| Q14204 | Cytoplasmic dynein 1 heavy chain 1                                                            | DYNC1H1 | 140 | 38.8 | 0     | 323.3 | 0.91 | 0.92 | 0.92 | 0.91 | 0.89 | 0.96 | 0.96 | 0.93 | 0.86 |
| Q14232 | Translation initiation factor eIF-2B subunit alpha                                            | EIF2B1  | 4   | 16.1 | 0     | 2.982 | 0.69 | 0.58 | 0.56 | NaN  | 0.59 | NaN  | 0.87 | NaN  | 1.56 |
| Q14240 | Eukaryotic initiation factor 4A-II;Eukaryotic initiation factor 4A-II, N-terminally processed | EIF4A2  | 7   | 44   | 0     | 15.29 | 0.83 | NaN  | NaN  | 1.06 | 0.53 | NaN  | NaN  | NaN  | NaN  |
| Q14247 | Src substrate cortactin                                                                       | CTTN    | 23  | 49.5 | 0     | 207.8 | 1.03 | 0.89 | 1.04 | 0.99 | 1.12 | 1.07 | 1.33 | 1.16 | 1.04 |
| Q14258 | E3 ubiquitin/ISG15 ligase                                                                     | TRIM25  | 19  | 37.6 | 0     | 89.08 | 0.79 | 0.93 | 1.03 | 0.86 | 0.69 | 1.01 | 1.23 | 1.04 | 0.90 |
| Q14315 | Filamin-C                                                                                     | FLNC    | 74  | 45.6 | 0     | 323.3 | 1.06 | 1.11 | 1.01 | 0.97 | 0.94 | 0.94 | 1.11 | 1.22 | 1.05 |
| Q14320 | Protein FAM50A;Protein                                                                        | FAM50A  | 4   | 16.5 | 0     | 15.28 | 0.91 | 0.92 | 1.12 | NaN  | NaN  | 1.63 | NaN  | NaN  | 1.66 |
| Q14344 | Guanine nucleotide-binding protein subunit alpha-13                                           | GNA13   | 2   | 5.3  | 0.008 | 1.589 | NaN  | 1.02 | 1.38 | NaN  | NaN  | NaN  | NaN  | NaN  | NaN  |
| Q5QPP3 | UDP-glucose 4-epimerase                                                                       | GALE    | 5   | 28.6 | 0     | 23.84 | 0.81 | 1.32 | 0.90 | 0.87 | 0.93 | 1.42 | 1.05 | NaN  | 0.56 |
| Q14444 | Caprin-1                                                                                      | CAPRIN1 | 11  | 22.8 | 0     | 284.6 | 0.99 | 1.01 | 1.30 | 0.99 | 1.01 | 1.06 | 0.83 | 0.83 | 0.73 |
| Q14498 | RNA-binding protein 39                                                                        | RBM39   | 11  | 30.8 | 0     | 124.6 | 1.25 | 1.42 | 1.46 | 0.78 | 1.31 | 1.24 | 0.78 | 0.74 | 0.89 |
| Q14566 | DNA replication licensing factor MCM6                                                         | MCM6    | 6   | 8.6  | 0     | 7.33  | NaN  | 1.07 | NaN  | 6.73 | 0.84 | 0.65 | NaN  | NaN  | 0.79 |
| Q14573 | Inositol 1,4,5-trisphosphate receptor type 3                                                  | ITPR3   | 13  | 8.9  | 0     | 35.28 | 0.80 | 0.97 | 0.81 | 0.67 | 0.75 | 0.70 | NaN  | 0.85 | 0.95 |
| Q14677 | Clathrin interactor 1                                                                         | CLINT1  | 2   | 4.8  | 0     | 6.117 | NaN  | NaN  | NaN  | NaN  | NaN  | 0.75 | 2.04 | NaN  | 1.29 |
| Q14697 | Neutral alpha-glucosidase AB                                                                  | GANAB   | 38  | 47.6 | 0     | 323.3 | 1.01 | 0.96 | 1.00 | 0.94 | 1.06 | 0.98 | 1.00 | 0.97 | 1.02 |
| Q14764 | Major vault protein                                                                           | MVP     | 24  | 37.4 | 0     | 126.8 | 0.74 | 0.66 | 0.67 | 0.72 | 0.84 | 0.94 | 0.81 | 0.69 | 1.03 |
| Q14847 | LIM and SH3 domain protein 1                                                                  | LASP1   | 17  | 57.5 | 0     | 323.3 | 0.94 | 1.01 | 0.96 | 1.09 | 1.04 | 1.01 | 0.94 | 0.91 | 0.96 |
| Q14974 | Importin subunit beta-1                                                                       | KPNB1   | 29  | 42.2 | 0     | 323.3 | 0.96 | 0.96 | 0.96 | 0.94 | 1.00 | 0.95 | 0.93 | 0.89 | 0.97 |
| Q14978 | Nucleolar and coiled-body phosphoprotein 1                                                    | NOLC1   | 9   | 13.3 | 0     | 25.46 | 0.95 | 0.85 | 0.89 | 0.79 | 1.22 | 1.06 | 0.79 | 0.75 | 0.89 |
| Q14980 | Nuclear mitotic apparatus protein                                                             | NUMA1   | 36  | 24.3 | 0     | 323.3 | 0.76 | 0.78 | 0.59 | 0.78 | 0.72 | 0.73 | 0.66 | 0.66 | 0.81 |

|        |                                                                 |          |     |      |       |       |      |      |      |      |      |      |      |      |      |
|--------|-----------------------------------------------------------------|----------|-----|------|-------|-------|------|------|------|------|------|------|------|------|------|
| Q14CX7 | N-alpha-acetyltransferase 25, NatB auxiliary subunit            | NAA25    | 3   | 3.5  | 0.009 | 1.406 | NaN  | NaN  | 0.67 | NaN  | 0.71 | 1.02 | NaN  | NaN  | NaN  |
| Q15008 | 26S proteasome non-ATPase regulatory subunit 6                  | PSMD6    | 10  | 29.3 | 0     | 136.8 | 1.10 | 1.00 | 1.15 | 1.11 | 0.93 | 1.09 | 1.06 | 1.09 | 1.00 |
| Q15019 | Septin-2                                                        | SEPT2    | 12  | 47.9 | 0     | 323.3 | 1.04 | 0.99 | 1.02 | 1.03 | 1.08 | 1.04 | 1.03 | 1.01 | 1.06 |
| Q15021 | Condensin complex subunit 1 116 kDa U5 small nuclear            | NCAPD2   | 8   | 8.1  | 0     | 11    | 1.13 | 1.30 | NaN  | NaN  | NaN  | 1.15 | NaN  | NaN  | 1.26 |
| Q15029 | ribonucleoprotein component                                     | EFTUD2   | 14  | 23.4 | 0     | 47.84 | 0.81 | 0.78 | 0.74 | NaN  | 1.01 | 0.86 | 0.94 | 0.76 | 0.93 |
| Q15046 | Lysine--tRNA ligase Eukaryotic translation initiation factor 4H | KARS     | 15  | 29   | 0     | 35.21 | 1.26 | 1.03 | 1.08 | 0.88 | 1.11 | 1.00 | 1.05 | 1.05 | 1.62 |
| Q15056 | factor 4H                                                       | EIF4H    | 13  | 45.6 | 0     | 284.7 | 1.17 | 1.05 | 1.23 | 1.12 | 1.10 | 1.14 | 1.11 | 0.98 | 0.87 |
| Q15075 | Early endosome antigen 1                                        | EEA1     | 21  | 21.2 | 0     | 113.3 | 1.07 | 1.34 | 1.11 | 1.13 | 0.93 | 1.09 | 0.87 | 1.02 | 1.24 |
| Q15084 | Protein disulfide-isomerase A6                                  | PDIA6    | 17  | 51.4 | 0     | 323.3 | 1.12 | 1.17 | 1.11 | 1.00 | 1.05 | 1.09 | 1.14 | 1.09 | 1.14 |
| Q15102 | Platelet-activating factor acetylhydrolase IB subunit           | PAFAH1B3 | 7   | 49.8 | 0     | 323.3 | 1.03 | 0.93 | 0.93 | 1.05 | 0.91 | 0.87 | 1.00 | 1.02 | 0.89 |
| Q15121 | Astrocytic phosphoprotein PEA-3-beta-hydroxysteroid-            | PEA15    | 7   | 45.4 | 0     | 35.98 | 1.30 | 1.28 | 1.41 | NaN  | 1.22 | 1.17 | 1.12 | NaN  | 1.06 |
| Q15125 | Delta(8),Delta(7)-isomerase                                     | EBP      | 3   | 16.5 | 0     | 196.3 | 0.90 | 1.11 | 1.25 | 0.86 | 0.82 | 0.78 | 0.91 | 1.05 | 1.20 |
| Q15149 | Plectin                                                         | PLEC     | 259 | 59   | 0     | 323.3 | 0.92 | 0.90 | 0.90 | 0.90 | 0.86 | 0.89 | 1.12 | 1.12 | 1.09 |
| Q15181 | Inorganic pyrophosphatase                                       | PPA1     | 18  | 82   | 0     | 293.9 | 0.97 | 0.93 | 0.97 | 1.05 | 0.97 | 0.97 | 0.95 | 0.94 | 0.94 |
| Q15185 | Prostaglandin E synthase 3                                      | PTGES3   | 7   | 46.2 | 0     | 186.2 | 1.31 | 1.29 | 1.30 | 1.24 | 1.01 | 1.42 | 1.06 | 1.23 | 1.17 |
| Q15233 | Non-POU domain-containing octamer-binding protein               | NONO     | 21  | 53.9 | 0     | 122.4 | 0.90 | 0.88 | 0.90 | 0.92 | 0.97 | 1.00 | 0.88 | 0.88 | 0.83 |
| Q15293 | Reticulocalbin-1                                                | RCN1     | 19  | 61.3 | 0     | 323.3 | 0.90 | 0.98 | 1.00 | 1.11 | 1.06 | 1.01 | 0.96 | 1.08 | 0.88 |
| Q15363 | Transmembrane emp24 domain-containing protein 2                 | TMED2    | 4   | 24.4 | 0     | 2.92  | 1.12 | 0.78 | NaN  | NaN  | 1.09 | NaN  | 0.49 | NaN  | NaN  |
| Q15365 | Poly(rC)-binding protein 1                                      | PCBP1    | 13  | 87.1 | 0     | 323.3 | 0.92 | 0.90 | 0.83 | 0.91 | 0.95 | 0.99 | 0.93 | 0.88 | 0.94 |
| Q15366 | Poly(rC)-binding protein 2                                      | PCBP2    | 2   | 41.9 | 0     | 94    | 0.93 | 0.98 | 0.92 | 0.90 | 0.88 | 0.91 | 0.95 | 0.96 | 0.90 |
| Q15382 | GTP-binding protein Rheb                                        | RHEB     | 6   | 28.8 | 0     | 40.27 | 0.79 | 0.76 | 0.78 | 0.89 | 0.89 | 0.88 | 0.61 | 0.88 | 0.69 |
| Q15393 | Splicing factor 3B subunit 3                                    | SF3B3    | 9   | 8.4  | 0     | 9.23  | 0.88 | 0.85 | 0.96 | 0.96 | 0.87 | 1.17 | 1.10 | 0.97 | 0.88 |
| Q15417 | Calponin-3                                                      | CNN3     | 7   | 61.7 | 0     | 323.3 | 1.17 | 1.12 | 1.15 | 1.06 | 1.02 | 1.04 | 1.16 | 1.18 | 1.20 |
| Q15424 | Scaffold attachment factor B1                                   | SAFB     | 9   | 24.3 | 0     | 223.6 | 1.02 | 0.93 | 1.03 | 0.93 | 1.12 | 1.17 | 0.83 | 2.66 | 1.09 |
| Q15427 | Splicing factor 3B subunit 4                                    | SF3B4    | 5   | 20.3 | 0     | 31.36 | 0.66 | 0.87 | NaN  | NaN  | NaN  | 0.88 | NaN  | NaN  | 1.04 |
| Q15428 | Splicing factor 3A subunit 2                                    | SF3A2    | 5   | 16.8 | 0     | 323.3 | 0.83 | 0.91 | 0.99 | 1.06 | 0.96 | 0.89 | NaN  | 1.39 | 1.03 |
| Q15459 | Splicing factor 3A subunit 1                                    | SF3A1    | 14  | 23.8 | 0     | 159.5 | 0.90 | 1.00 | 0.92 | 1.69 | 1.15 | 0.90 | 0.85 | 1.58 | 0.85 |
| Q15637 | Splicing factor 1                                               | SF1      | 10  | 20.2 | 0     | 51.5  | 1.12 | 1.17 | 1.19 | 1.03 | 1.17 | 1.06 | 1.01 | 1.07 | 0.88 |
| Q15642 | Cdc42-interacting protein 4                                     | TRIP10   | 12  | 31.3 | 0     | 79.14 | 1.25 | 1.21 | 1.26 | 1.75 | 1.16 | 1.51 | NaN  | 1.64 | 1.05 |
| Q15645 | Pachytene checkpoint protein 2 homolog                          | TRIP13   | 4   | 12   | 0     | 4.034 | NaN  | NaN  | NaN  | 0.95 | 0.83 | NaN  | NaN  | NaN  | NaN  |
| Q15691 | Microtubule-associated protein RP/EB family member 1            | MAPRE1   | 18  | 76.5 | 0     | 285.3 | 1.20 | 1.19 | 1.08 | 1.05 | 1.21 | 1.02 | 0.98 | 1.00 | 1.04 |
| Q15717 | ELAV-like protein 1                                             | ELAVL1   | 12  | 45.7 | 0     | 255.3 | 1.00 | 0.92 | 0.99 | 0.84 | 0.92 | 0.94 | 1.02 | 0.80 | 0.94 |
| Q15738 | Sterol-4-alpha-carboxylate 3-dehydrogenase, decarboxylating     | NSDHL    | 6   | 27.6 | 0     | 17.21 | NaN  | NaN  | 0.61 | NaN  | 0.92 | NaN  | 0.83 | NaN  | 0.65 |
| Q15758 | Neutral amino acid transporter B(0);Amino acid transporter      | SLC1A5   | 6   | 13.3 | 0     | 39.9  | 0.70 | 0.84 | 0.71 | 0.92 | 0.85 | NaN  | 0.92 | 0.93 | 0.97 |

|        |                                                                                                                                |           |    |      |       |       |      |      |      |      |      |      |      |      |      |
|--------|--------------------------------------------------------------------------------------------------------------------------------|-----------|----|------|-------|-------|------|------|------|------|------|------|------|------|------|
| Q15785 | Mitochondrial import receptor subunit TOM34                                                                                    | TOMM34    | 3  | 14.2 | 0     | 23.12 | 0.91 | NaN  | 1.09 | NaN  | 0.75 | NaN  | NaN  | NaN  | NaN  |
| Q15819 | Ubiquitin-conjugating enzyme E2 variant 2                                                                                      | UBE2V2    | 3  | 36.6 | 0.006 | 1.693 | 1.20 | 0.97 | 0.92 | 1.06 | 0.99 | 0.86 | NaN  | NaN  | NaN  |
| Q15836 | Vesicle-associated membrane protein 3                                                                                          | VAMP3     | 3  | 46   | 0     | 214.8 | NaN  | 1.07 | NaN  | 1.25 | NaN  | 1.07 | 0.88 | 0.94 | 1.42 |
| Q15907 | Ras-related protein Rab-11B                                                                                                    | RAB11B    | 2  | 58.7 | 0     | 223.5 | 1.27 | 1.19 | 1.15 | 1.22 | 1.19 | 1.12 | 1.38 | 1.26 | 1.30 |
| Q16186 | Proteasomal ubiquitin receptor ADRM1                                                                                           | ADRM1     | 7  | 21.4 | 0     | 179.9 | 1.25 | 1.17 | 1.01 | 1.17 | 1.07 | 1.18 | 0.80 | NaN  | 1.00 |
| Q16222 | UDP-N-acetylnexosamine pyrophosphorylase;UDP-N-acetylgalactosamine pyrophosphorylase;UDP-N-acetylglucosamine pyrophosphorylase | UAP1      | 9  | 25.9 | 0     | 23.39 | 1.23 | 1.23 | 1.42 | 1.17 | 0.90 | 1.36 | NaN  | 1.23 | 1.24 |
| Q16270 | Insulin-like growth factor-binding protein 7                                                                                   | IGFBP7    | 7  | 39.7 | 0     | 223.2 | 1.98 | 1.93 | 2.34 | 1.06 | 1.29 | 1.55 | 2.16 | 2.56 | 2.62 |
| Q16401 | 26S proteasome non-ATPase regulatory subunit 5                                                                                 | PSMD5     | 10 | 28.2 | 0     | 41.15 | NaN  | NaN  | NaN  | 1.43 | 0.86 | NaN  | 0.71 | 0.74 | 0.74 |
| Q16531 | DNA damage-binding protein 1 Hsp90 co-chaperone                                                                                | DDB1      | 20 | 22.5 | 0     | 227.3 | 0.83 | 0.71 | 0.84 | 0.86 | 0.89 | 0.90 | 0.98 | 0.85 | 0.99 |
| Q16543 | Cdc37;Hsp90 co-chaperone                                                                                                       | CDC37     | 12 | 34.9 | 0     | 302.1 | 0.89 | 0.91 | 0.87 | 0.92 | 0.90 | 0.87 | 0.86 | 0.86 | 0.86 |
| Q16658 | Cdc37, N-terminally processed Fascin                                                                                           | FSCN1     | 5  | 14.6 | 0     | 5.275 | 0.60 | 1.09 | 0.72 | NaN  | 0.97 | 0.59 | NaN  | 0.90 | 0.87 |
| Q16666 | Gamma-interferon-inducible protein 16                                                                                          | IFI16     | 3  | 5.9  | 0     | 4.128 | 0.43 | NaN  | 0.71 | NaN  | 0.96 | 0.97 | NaN  | NaN  | 0.74 |
| Q16698 | 2,4-dienoyl-CoA reductase, mitochondrial                                                                                       | DECR1     | 7  | 28.4 | 0     | 40.33 | 0.86 | 1.15 | 0.65 | NaN  | 0.97 | 0.91 | 0.58 | NaN  | 0.85 |
| Q16706 | Alpha-mannosidase 2                                                                                                            | MAN2A1    | 2  | 3    | 0.001 | 2.695 | 1.02 | 1.02 | 0.90 | NaN  | NaN  | 1.29 | NaN  | NaN  | NaN  |
| Q16891 | MICOS complex subunit MIC60                                                                                                    | IMMT      | 24 | 43.1 | 0     | 236.6 | 1.01 | 0.91 | 1.05 | 1.00 | 0.93 | 0.94 | 0.91 | 1.09 | 0.99 |
| Q1KMD3 | Heterogeneous nuclear ribonucleoprotein U-like protein 2                                                                       | HNRNPUL2  | 13 | 24.1 | 0     | 178   | 0.78 | 0.90 | 0.99 | 0.82 | 0.83 | 0.98 | 0.90 | 0.57 | 1.05 |
| Q27J81 | Inverted formin-2                                                                                                              | INF2      | 7  | 10.1 | 0     | 35.48 | NaN  | 0.92 | 1.18 | NaN  | 1.36 | NaN  | NaN  | 1.10 | NaN  |
| Q2NKX8 | DNA excision repair protein ERCC-6-like                                                                                        | ERCC6L    | 3  | 3.8  | 0.001 | 2.641 | 0.78 | 0.81 | 1.24 | 0.89 | 0.87 | 0.88 | 0.70 | 0.67 | 1.48 |
| Q2TAY7 | WD40 repeat-containing protein SMU1;WD40 repeat-containing protein SMU1, N-terminally processed                                | SMU1      | 2  | 3.9  | 0     | 4.617 | 0.97 | 1.04 | 0.92 | 0.73 | 0.99 | 0.99 | 0.76 | 0.85 | 1.17 |
| Q32MZ4 | Leucine-rich repeat flightless-interacting protein 1                                                                           | LRRFIP1   | 10 | 19.3 | 0     | 100.6 | 1.20 | 1.00 | 0.97 | 0.75 | 1.05 | 0.75 | 0.91 | NaN  | 1.52 |
| Q32P28 | Prolyl 3-hydroxylase 1                                                                                                         | LEPRE1    | 9  | 17.7 | 0     | 14.09 | NaN  | 1.12 | 1.09 | 1.05 | 0.86 | 0.92 | NaN  | 0.98 | 0.72 |
| Q32Q12 | Nucleoside diphosphate kinase;Nucleoside diphosphate kinase B                                                                  | NME1-NME2 | 1  | 71.9 | 0     | 323.3 | 0.97 | 0.98 | 0.98 | 1.00 | 1.00 | 1.00 | 1.02 | 1.03 | 1.01 |
| Q3BDU5 |                                                                                                                                | LMNA      | 0  | 72.7 | 0     | 144.9 | 1.31 | 1.19 | 1.12 | NaN  | 0.95 | 0.95 | NaN  | NaN  | 1.12 |
| Q3ZCM7 | Tubulin beta-8 chain                                                                                                           | TUBB8     | 2  | 25.9 | 0     | 323.3 | 0.39 | 0.38 | 0.43 | 0.54 | 0.51 | 0.45 | 0.59 | 0.53 | 0.50 |

|        |                                                                                                                 |           |    |      |       |       |      |      |      |      |      |      |      |      |      |
|--------|-----------------------------------------------------------------------------------------------------------------|-----------|----|------|-------|-------|------|------|------|------|------|------|------|------|------|
| Q3ZCQ8 | Mitochondrial import inner membrane translocase subunit TIM50                                                   | TIMM50    | 4  | 15.3 | 0     | 12.29 | 0.96 | 1.23 | 1.04 | NaN  | NaN  | 1.07 | 1.38 | 1.40 | 1.14 |
| Q52LW3 | Rho GTPase-activating protein                                                                                   | ARHGAP2   | 7  | 7.1  | 0     | 7.896 | NaN  | NaN  | 0.54 | 1.06 | 0.84 | 0.89 | 0.71 | NaN  | 0.68 |
| Q53GQ0 | Very-long-chain 3-oxoacyl-CoA reductase                                                                         | HSD17B12  | 7  | 34.6 | 0     | 87.16 | 0.75 | 0.85 | 1.14 | NaN  | 1.00 | 0.70 | NaN  | 0.52 | 0.81 |
| Q562R1 | Beta-actin-like protein 2                                                                                       | ACTBL2    | 2  | 25.3 | 0     | 14.68 | 1.04 | 0.99 | NaN  | 1.00 | 0.99 | 0.89 | 1.09 | 1.08 | 1.13 |
| Q56VL3 | OCIA domain-containing protein                                                                                  | OCIAD2    | 3  | 19.5 | 0     | 4.814 | 0.67 | 0.87 | 0.67 | NaN  | NaN  | 0.68 | NaN  | NaN  | 1.21 |
| Q58FF6 | Putative heat shock protein HSP 90-beta 4                                                                       | HSP90AB4  | 1  | 10.1 | 0     | 34    | 0.93 | 0.90 | 0.95 | 0.92 | 0.95 | 0.91 | 0.52 | 0.54 | 0.57 |
| Q58FF8 | Putative heat shock protein HSP 90-beta 2                                                                       | HSP90AB2  | 1  | 27   | 0     | 56.76 | 0.92 | 0.87 | 0.91 | 0.88 | 0.98 | 0.91 | 0.70 | NaN  | 0.70 |
| Q5HYB6 |                                                                                                                 | DKFZp686  | 0  | 78.9 | 0     | 126   | 1.07 | 1.07 | 1.05 | 1.01 | 0.98 | 1.11 | 1.14 | 1.04 | 1.11 |
| Q5JPT2 | SH3 domain-containing kinase-binding protein 1                                                                  | SH3KBP1   | 13 | 27.4 | 0     | 141.4 | 2.43 | 2.36 | 2.56 | 1.54 | 1.18 | 1.05 | 0.87 | 1.22 | 1.31 |
| Q5QPL9 | RNA-binding protein Raly                                                                                        | RALY      | 13 | 54.9 | 0     | 28.45 | 0.86 | 0.88 | 0.81 | 0.94 | 0.85 | 0.88 | 0.87 | 0.81 | 0.88 |
| Q5R3I4 | Tetratricopeptide repeat protein                                                                                | TTC38     | 6  | 18.8 | 0     | 6.508 | 0.54 | 0.59 | 0.52 | 0.56 | 0.63 | 0.81 | 0.72 | 0.98 | 0.89 |
| Q5STZ8 |                                                                                                                 | ABCF1     | 1  | 12.7 | 0     | 21.82 | NaN  | NaN  | NaN  | NaN  | 0.65 | 0.71 | NaN  | NaN  | NaN  |
| Q5T123 | SH3 domain-binding glutamic acid-rich-like protein 3<br>Coiled-coil-helix-coiled-coil domain-containing protein | SH3BGRL3  | 4  | 42   | 0     | 47.52 | 1.07 | 0.93 | 1.00 | 0.86 | 0.73 | 1.04 | 1.10 | 0.86 | 0.81 |
| Q9Y6H1 | 2;Putative coiled-coil-helix-coiled-coil-helix domain-containing protein CHCHD2P9                               | CHCHD2    | 2  | 27.2 | 0     | 36.59 | 1.05 | 0.86 | 0.91 | 1.00 | 1.00 | 1.46 | 1.09 | 1.15 | 0.87 |
| Q5T4S7 | E3 ubiquitin-protein ligase                                                                                     | UBR4      | 8  | 2.7  | 0     | 37.88 | 1.03 | 0.85 | 1.06 | NaN  | NaN  | 0.96 | NaN  | NaN  | 0.78 |
| Q5T6H7 | Xaa-Pro aminopeptidase 1                                                                                        | XPNPEP1   | 6  | 19.9 | 0     | 18.73 | 0.57 | 0.75 | 0.80 | 0.85 | 0.91 | 0.66 | 0.74 | 0.91 | 0.90 |
| Q5T6W2 |                                                                                                                 | HNRNPK    | 1  | 57.5 | 0     | 3.313 | 0.82 | 0.66 | 0.79 | NaN  | NaN  | NaN  | 1.01 | 0.97 | 0.79 |
| Q5TH30 | Protein NDRG3                                                                                                   | NDRG3     | 4  | 15.5 | 0     | 6.676 | NaN  | 0.54 | NaN  | 0.63 | 0.79 | 1.07 | 0.95 | 0.73 | NaN  |
| Q6DD88 | Atlastin-3                                                                                                      | ATL3      | 11 | 28.5 | 0     | 270.9 | 0.97 | 1.00 | 0.98 | 0.89 | 0.92 | 1.07 | 0.60 | 0.73 | 1.03 |
| Q6DKJ4 | Nucleoredoxin                                                                                                   | NXN       | 10 | 31   | 0     | 21.56 | 0.82 | 0.80 | NaN  | NaN  | 0.87 | NaN  | NaN  | 0.71 | NaN  |
| Q6NUK1 | Calcium-binding mitochondrial carrier protein SCaMC-1                                                           | SLC25A24  | 24 | 53.7 | 0     | 126.5 | 1.57 | 1.71 | 1.67 | 1.19 | 1.20 | 1.20 | 1.64 | 1.20 | 1.41 |
| Q6NZI2 | Polymerase I and transcript release factor                                                                      | PTRF      | 11 | 34.1 | 0     | 323.3 | 1.00 | 0.98 | 1.05 | 0.97 | 1.04 | 1.06 | 0.84 | 0.96 | 0.94 |
| Q6P2Q9 | Pre-mRNA-processing-splicing factor 8                                                                           | PRPF8     | 23 | 13.1 | 0     | 39.36 | 0.64 | 0.77 | 0.92 | 0.78 | 0.85 | 0.90 | 0.80 | 0.95 | 1.07 |
| Q6PKG0 | La-related protein 1                                                                                            | LARP1     | 2  | 1.9  | 1E-03 | 2.148 | 0.97 | 0.78 | 0.73 | 0.70 | NaN  | NaN  | 0.67 | 0.75 | 0.46 |
| Q6WKZ4 | Rab11 family-interacting protein                                                                                | RAB11FIP1 | 1  | 0.6  | 0.009 | 1.431 | 1.36 | 1.41 | 1.54 | 1.19 | 1.29 | 1.37 | NaN  | 1.87 | 1.92 |
| Q6YN16 | Hydroxysteroid dehydrogenase-like protein 2                                                                     | HSDL2     | 8  | 25.1 | 0     | 74.97 | 1.39 | 1.17 | 1.33 | NaN  | 1.17 | 1.27 | 0.98 | 1.72 | 1.52 |
| Q6ZN40 | Tropomyosin alpha-1 chain                                                                                       | TPM1      | 1  | 33.4 | 0     | 7.568 | 1.41 | 1.25 | NaN  | NaN  | NaN  | 1.20 | NaN  | NaN  | 1.39 |
| Q70J99 | Protein unc-13 homolog D                                                                                        | UNC13D    | 5  | 8.3  | 0     | 24.62 | NaN  | 0.45 | 0.49 | NaN  | NaN  | 0.65 | 0.95 | NaN  | 1.36 |
| Q70UQ0 | Inhibitor of nuclear factor kappa-B kinase-interacting protein                                                  | IKBIP     | 4  | 12.3 | 0     | 7.237 | NaN  | NaN  | 1.61 | 0.58 | 1.50 | 1.31 | NaN  | NaN  | NaN  |
| Q71U36 | Tubulin alpha-1A chain;Tubulin alpha-3E chain                                                                   | TUBA1A    | 1  | 80.7 | 0     | 4.532 | 0.28 | 0.40 | 0.42 | NaN  | NaN  | 0.46 | NaN  | NaN  | 0.95 |

|        |                                                         |           |    |      |       |       |      |      |      |      |      |      |      |      |      |
|--------|---------------------------------------------------------|-----------|----|------|-------|-------|------|------|------|------|------|------|------|------|------|
| Q7KZF4 | Staphylococcal nuclease domain-containing protein 1     | SND1      | 34 | 50.7 | 0     | 323.3 | 0.91 | 0.95 | 0.85 | 0.88 | 0.89 | 0.85 | 1.08 | 0.98 | 0.97 |
| Q7L1Q6 | Basic leucine zipper and W2 domain-containing protein 1 | BZW1      | 6  | 28.2 | 0     | 20.36 | 1.34 | 1.29 | 1.27 | 1.39 | 1.12 | 1.25 | 1.05 | 1.03 | 1.07 |
| Q7L2H7 | Eukaryotic translation initiation factor 3 subunit M    | EIF3M     | 15 | 47.1 | 0     | 120   | 1.03 | 0.83 | 0.89 | 1.10 | 0.95 | 0.90 | 0.54 | 1.10 | 0.87 |
| Q7L576 | Cytoplasmic FMR1-interacting protein 1                  | CYFIP1    | 7  | 11.2 | 0     | 15.7  | 1.16 | 0.85 | 0.73 | 0.84 | 0.90 | 0.89 | NaN  | 1.25 | 0.83 |
| Q9H8S9 | MOB kinase activator 1A;MOB kinase activator 1B         | MOB1A     | 2  | 10.6 | 0     | 3.127 | 1.07 | 1.17 | NaN  | NaN  | 1.21 | NaN  | NaN  | 0.75 | NaN  |
| Q7RTV0 | PHD finger-like domain-containing protein 5A            | PHF5A     | 2  | 26.4 | 0     | 58.28 | 1.27 | 0.89 | NaN  | NaN  | 0.88 | NaN  | NaN  | NaN  | 0.93 |
| Q7Z406 | Myosin-14                                               | MYH14     | 3  | 6.1  | 0     | 7.572 | 1.08 | 0.96 | 0.91 | 1.13 | 1.19 | 1.53 | 1.11 | 1.30 | 1.23 |
| Q7Z6Z7 | E3 ubiquitin-protein ligase                             | HUWE1     | 41 | 13.3 | 0     | 245.6 | 0.97 | 0.97 | 0.94 | 1.00 | 0.99 | 0.98 | 0.90 | 0.96 | 0.82 |
| Q7Z7H5 | Transmembrane emp24 domain-containing protein 4         | TMED4     | 3  | 20.3 | 0     | 18.54 | 0.87 | 0.99 | 1.07 | 1.37 | 0.98 | 0.97 | NaN  | NaN  | 0.93 |
| Q86TI2 | Dipeptidyl peptidase 9                                  | DPP9      | 6  | 8.7  | 0     | 25.64 | NaN  | NaN  | NaN  | NaN  | 0.76 | 0.77 | NaN  | NaN  | 0.90 |
| Q86UE4 | Protein LYRIC                                           | MTDH      | 10 | 21   | 0     | 164.3 | 0.75 | 0.98 | 1.26 | 0.97 | 1.04 | 1.00 | 0.97 | 0.89 | 0.86 |
| Q86UP2 | Kinectin                                                | KTN1      | 32 | 27.7 | 0     | 142.3 | 1.09 | 1.17 | 1.14 | 1.20 | 1.15 | 1.33 | 0.82 | 1.01 | 1.34 |
| Q86V81 | THO complex subunit 4                                   | ALYREF    | 5  | 36.2 | 0     | 41.14 | 0.92 | 0.90 | NaN  | 1.00 | 0.86 | NaN  | 0.86 | 0.87 | 0.81 |
| Q86VP6 | Cullin-associated NEDD8-dissociated protein 1           | CAND1     | 19 | 18.3 | 0     | 39.33 | 1.03 | 0.96 | 0.99 | 0.96 | 1.02 | 1.01 | 0.91 | 0.91 | 1.09 |
| Q86X55 | Histone-arginine methyltransferase CARM1                | CARM1     | 5  | 17.8 | 0     | 22.55 | NaN  | 0.56 | 0.61 | NaN  | 0.48 | 0.68 | NaN  | NaN  | NaN  |
| Q86Y56 | Dynein assembly factor 5, axonemal                      | DNAAF5    | 3  | 4.4  | 0.001 | 2.085 | NaN  | NaN  | 0.92 | 0.76 | 0.68 | NaN  | NaN  | NaN  | 1.00 |
| Q8IUE6 | Histone H2A type 2-B                                    | HIST2H2AI | 1  | 35.4 | 0     | 6.544 | 1.11 | 0.97 | 0.82 | 1.14 | 1.22 | 0.99 | NaN  | NaN  | 0.85 |
| Q8IVD9 | NudC domain-containing protein                          | NUDCD3    | 3  | 17.2 | 0     | 2.885 | NaN  | NaN  | NaN  | 0.63 | 0.75 | 0.95 | NaN  | NaN  | NaN  |
| Q8IVF2 | Protein AHNAK2                                          | AHNAK2    | 4  | 5.3  | 0     | 5.874 | 0.91 | 0.82 | 0.99 | 0.44 | NaN  | 0.77 | 1.17 | 1.37 | 0.99 |
| Q8IVM0 | Coiled-coil domain-containing protein 50                | CCDC50    | 3  | 11.8 | 0     | 8.379 | NaN  | 1.36 | 1.29 | NaN  | NaN  | NaN  | NaN  | NaN  | 1.58 |
| Q8IW52 | SLIT and NTRK-like protein 4                            | SLITRK4   | 2  | 2.7  | 0.007 | 1.624 | 0.84 | 0.82 | 0.85 | 0.98 | NaN  | 0.79 | 0.98 | NaN  | 0.93 |
| Q8IWE2 | Protein NOXP20                                          | FAM114A1  | 9  | 23.8 | 0     | 102   | 0.93 | 0.82 | 1.11 | 0.97 | 1.04 | 0.79 | NaN  | 1.01 | 1.06 |
| Q8IY81 | pre-rRNA processing protein FTSJ3                       | FTSJ3     | 6  | 12.5 | 0     | 15.97 | 1.16 | 1.00 | 1.35 | NaN  | 1.04 | 0.96 | NaN  | 1.09 | 0.95 |
| Q8N0X7 | Spartin                                                 | SPG20     | 3  | 6.5  | 0     | 5.031 | NaN  | 1.99 | 1.02 | NaN  | NaN  | 0.79 | NaN  | NaN  | 0.75 |
| Q8N163 | Cell cycle and apoptosis regulator protein 2            | CCAR2     | 5  | 9    | 0     | 11.4  | 0.77 | 0.78 | 0.78 | 1.01 | 0.95 | 0.62 | 1.11 | 0.96 | 0.91 |
| Q8N1F7 | Nuclear pore complex protein Nup93                      | NUP93     | 10 | 19.4 | 0     | 43.76 | NaN  | NaN  | NaN  | 0.60 | 0.92 | 0.87 | 0.93 | 0.87 | 1.07 |
| Q8N1G4 | Leucine-rich repeat-containing protein 47               | LRRC47    | 9  | 19.7 | 0     | 30.36 | 0.68 | 1.09 | 0.73 | 1.07 | 1.12 | 0.73 | 1.26 | 1.28 | 0.91 |
| Q8N3U4 | Cohesin subunit SA-2                                    | STAG2     | 2  | 3.2  | 0.001 | 2.673 | NaN  | NaN  | 0.76 | NaN  | 0.93 | 1.06 | NaN  | NaN  | 0.76 |
| Q8N4X5 | Actin filament-associated protein 1-like 2              | AFAP1L2   | 4  | 9.2  | 0     | 8.154 | 1.22 | 1.07 | 1.28 | 1.26 | NaN  | 1.12 | 1.39 | NaN  | NaN  |
| Q8N999 | Uncharacterized protein                                 | C12orf29  | 1  | 3.1  | 5E-04 | 2.843 | 1.26 | 1.19 | 1.34 | 1.03 | 1.18 | 1.15 | 1.17 | NaN  | 1.15 |
| Q8NBF2 | NHL repeat-containing protein 2                         | NHLRC2    | 2  | 4.5  | 0     | 5.7   | NaN  | NaN  | 0.39 | 0.66 | NaN  | NaN  | 0.60 | NaN  | 0.38 |

|        |                                                                     |          |    |      |       |       |      |      |      |      |      |      |      |      |      |
|--------|---------------------------------------------------------------------|----------|----|------|-------|-------|------|------|------|------|------|------|------|------|------|
| Q8NBJ5 | Procollagen galactosyltransferase 1                                 | COLGALT1 | 7  | 13.7 | 0     | 9.849 | 0.72 | 0.74 | 1.78 | 0.95 | 1.13 | 0.85 | NaN  | 1.16 | 0.84 |
| Q8NBS9 | Thioredoxin domain-containing protein 5                             | TXNDC5   | 17 | 45.1 | 0     | 322.1 | 1.12 | 1.27 | 1.23 | 1.05 | 1.09 | 1.16 | 1.32 | 1.26 | 1.26 |
| Q8NBX0 | Saccharopine dehydrogenase-like oxidoreductase                      | SCCPDH   | 6  | 20.7 | 0     | 9.15  | NaN  | NaN  | NaN  | 0.98 | 0.95 | NaN  | 1.34 | 0.21 | NaN  |
| Q8NC51 | Plasminogen activator inhibitor 1 RNA-binding protein               | SERBP1   | 16 | 47.8 | 0     | 323.3 | 0.95 | 0.90 | 0.89 | 1.02 | 0.96 | 0.91 | 0.76 | 0.86 | 0.82 |
| Q8NCW5 | NAD(P)H-hydrate epimerase                                           | APOA1BP  | 5  | 27.8 | 0     | 12.04 | 0.69 | 0.78 | 0.82 | 0.81 | NaN  | 0.75 | NaN  | NaN  | 1.21 |
| Q8NE71 | ATP-binding cassette sub-family F member 1                          | ABCF1    | 9  | 17.2 | 0     | 26.38 | 0.90 | 0.80 | 0.93 | 0.89 | 0.89 | 0.80 | NaN  | 0.62 | 0.83 |
| Q8NE73 | Ectonucleoside triphosphate diphosphohydrolase 4                    | ENTPD4   | 2  | 6.1  | 0.008 | 1.488 | 1.01 | 0.88 | 0.87 | 1.08 | 1.01 | 1.10 | NaN  | NaN  | NaN  |
| Q8NF37 | Lysophosphatidylcholine acyltransferase 1                           | LPCAT1   | 4  | 11.4 | 0     | 10.86 | 0.75 | NaN  | NaN  | 0.78 | 1.95 | 0.92 | NaN  | 1.03 | 1.05 |
| Q8NFQ8 | Torsin-1A-interacting protein 2                                     | TOR1AIP2 | 1  | 5.3  | 5E-04 | 2.814 | 1.18 | 0.94 | 1.37 | NaN  | NaN  | NaN  | NaN  | NaN  | 0.97 |
| Q8NI27 | THO complex subunit 2                                               | THOC2    | 3  | 2.6  | 0     | 3.139 | 0.78 | NaN  | 0.53 | NaN  | NaN  | NaN  | NaN  | NaN  | NaN  |
| Q8TAT6 | Nuclear protein localization protein 4 homolog                      | NPLOC4   | 8  | 17.6 | 0     | 23.4  | 1.07 | 1.32 | 1.24 | 0.76 | 0.84 | 0.92 | 1.65 | 1.25 | 1.15 |
| Q8TBC4 | NEDD8-activating enzyme E1 catalytic subunit                        | UBA3     | 6  | 25.3 | 0     | 12.9  | NaN  | 1.74 | NaN  | NaN  | 0.97 | 0.88 | NaN  | NaN  | NaN  |
| Q8TBQ9 | Protein kish-A Dolichyl-                                            | TMEM167A | 1  | 12.5 | 0.002 | 1.914 | 1.15 | 1.14 | 1.11 | NaN  | 1.24 | 1.10 | NaN  | 1.35 | 1.36 |
| Q8TCJ2 | diphosphooligosaccharide--protein glycosyltransferase subunit STT3B | STT3B    | 3  | 5.7  | 0     | 5.267 | 1.75 | NaN  | 1.42 | 1.57 | 1.19 | 1.24 | NaN  | NaN  | 1.40 |
| Q8TDN6 | Ribosome biogenesis protein BRX1 homolog                            | BRX1     | 2  | 5.9  | 1E-03 | 2.243 | 1.15 | 0.96 | 1.26 | 1.07 | 0.90 | 1.23 | 1.17 | 0.77 | 0.92 |
| Q8TEA8 | D-tyrosyl-tRNA(Tyr) deacylase                                       | DTD1     | 2  | 20.6 | 0     | 109.7 | 0.94 | 0.86 | 0.97 | 0.81 | 0.88 | 0.88 | NaN  | NaN  | 0.87 |
| Q8TEX9 | 1;D-tyrosyl-tRNA(Tyr) deacylase                                     | IPO4     | 6  | 8    | 0     | 12.98 | NaN  | 0.89 | NaN  | 0.61 | NaN  | 0.73 | 0.81 | 0.84 | NaN  |
| Q8TF65 | Importin-4 PDZ domain-containing protein                            | GIPC2    | 1  | 5.4  | 0     | 5.025 | 1.30 | 2.05 | 1.68 | NaN  | NaN  | 1.10 | NaN  | NaN  | 1.16 |
| Q8WUH6 | Transmembrane protein 263                                           | TMEM263  | 2  | 35.3 | 0     | 11.01 | NaN  | NaN  | 1.68 | 1.00 | 0.96 | 1.07 | NaN  | NaN  | NaN  |
| Q8WUM4 | Programmed cell death 6-interacting protein                         | PDCD6IP  | 33 | 46.4 | 0     | 252.7 | 0.95 | 0.92 | 0.92 | 0.87 | 0.91 | 0.94 | 0.87 | 0.90 | 1.00 |
| Q8WVM8 | Sec1 family domain-containing protein 1                             | SCFD1    | 5  | 11.4 | 0     | 10.06 | NaN  | 0.96 | 0.98 | NaN  | NaN  | 0.93 | NaN  | NaN  | 0.68 |
| Q8WW12 | PEST proteolytic signal-containing nuclear protein                  | PCNP     | 6  | 42.1 | 0     | 43.13 | 1.24 | 1.18 | 1.09 | 0.83 | 1.20 | 1.08 | 1.19 | 1.10 | 1.26 |
| Q8WWM7 | Ataxin-2-like protein                                               | ATXN2L   | 6  | 7.3  | 0     | 6.696 | 1.06 | 1.15 | 1.10 | NaN  | NaN  | NaN  | 1.15 | NaN  | 0.96 |
| Q8WX92 | Negative elongation factor B                                        | NELFB    | 3  | 7.6  | 0     | 9.645 | NaN  | NaN  | NaN  | NaN  | 0.84 | 0.79 | NaN  | NaN  | NaN  |
| Q8WX93 | Palladin                                                            | PALLD    | 8  | 8    | 0     | 7.941 | 0.74 | 0.26 | 0.96 | NaN  | 0.94 | 0.38 | NaN  | NaN  | 0.55 |
| Q8WXF1 | Paraspeckle component 1                                             | PSPC1    | 7  | 21.8 | 0     | 26.02 | 2.62 | NaN  | NaN  | 0.79 | 0.94 | NaN  | 0.84 | 0.90 | NaN  |
| Q8WXX5 | DnaJ homolog subfamily C member 9                                   | DNAJC9   | 9  | 45.8 | 0     | 32.93 | 0.71 | 0.93 | 0.82 | 0.93 | 0.90 | 0.62 | NaN  | 0.80 | 0.88 |
| Q92504 | Zinc transporter SLC39A7                                            | SLC39A7  | 2  | 5.3  | 0     | 6.335 | 1.06 | 1.02 | NaN  | 0.84 | 1.01 | 0.46 | NaN  | 1.02 | 1.10 |

|        |                                                               |          |    |      |       |       |      |      |      |      |      |      |      |      |      |
|--------|---------------------------------------------------------------|----------|----|------|-------|-------|------|------|------|------|------|------|------|------|------|
| Q92520 | Protein FAM3C                                                 | FAM3C    | 7  | 34.8 | 0     | 24.79 | 0.98 | 0.79 | 0.96 | 0.95 | 0.98 | 1.14 | 0.90 | 0.55 | 0.71 |
| Q92597 | Protein NDRG1                                                 | NDRG1    | 9  | 44.7 | 0     | 226.7 | 1.00 | 0.90 | 0.93 | 1.18 | 1.40 | 1.40 | 0.65 | 1.04 | 1.14 |
| Q92598 | Heat shock protein 105 kDa                                    | HSPH1    | 32 | 51.9 | 0     | 277.9 | 1.97 | 1.66 | 1.92 | 1.68 | 1.93 | 1.93 | 0.94 | 0.75 | 0.83 |
| Q92616 | Translational activator GCN1<br>Acidic leucine-rich nuclear   | GCN1L1   | 30 | 15   | 0     | 52.27 | 0.91 | 0.92 | 0.87 | 0.89 | 0.86 | 0.89 | 1.06 | 0.94 | 0.89 |
| Q92688 | phosphoprotein 32 family<br>member B                          | ANP32B   | 6  | 31.9 | 0     | 22.2  | 0.82 | 0.99 | 0.91 | 0.81 | 0.95 | 0.98 | 0.95 | 0.89 | 0.97 |
| Q92734 | Protein TFG                                                   | TFG      | 6  | 29.5 | 0     | 16.8  | NaN  | NaN  | NaN  | 1.44 | 1.23 | 1.37 | NaN  | NaN  | NaN  |
| Q92743 | Serine protease HTRA1                                         | HTRA1    | 6  | 17.3 | 0     | 99.7  | 1.16 | 2.14 | 1.12 | NaN  | 1.52 | 1.21 | 1.40 | NaN  | 0.59 |
| Q92769 | Histone deacetylase 2                                         | HDAC2    | 2  | 10.9 | 0.001 | 2.742 | 0.80 | 0.67 | 0.78 | NaN  | NaN  | NaN  | NaN  | NaN  | 0.75 |
| Q92804 | TATA-binding protein-associated<br>factor 2N                  | TAF15    | 7  | 23.6 | 0     | 323.3 | 0.95 | 0.95 | 1.02 | 1.06 | 0.93 | 0.85 | 1.06 | 0.94 | 0.97 |
| Q92890 | Ubiquitin fusion degradation<br>protein 1 homolog             | UFD1L    | 3  | 12.4 | 0     | 6.623 | NaN  | NaN  | NaN  | NaN  | 0.82 | 0.99 | NaN  | NaN  | NaN  |
| Q92900 | Regulator of nonsense<br>transcripts 1                        | UPF1     | 14 | 15.2 | 0     | 35.09 | 1.18 | 1.17 | 1.24 | 1.13 | 1.12 | 1.15 | 0.96 | 1.02 | 0.99 |
| Q92905 | COP9 signalosome complex<br>subunit 5                         | COPS5    | 1  | 4.5  | 0     | 3.54  | 0.54 | 0.54 | NaN  | NaN  | NaN  | NaN  | NaN  | NaN  | NaN  |
| Q92973 | Transportin-1                                                 | TNPO1    | 14 | 27.6 | 0     | 162.2 | 1.23 | 1.07 | 1.05 | 1.03 | 0.99 | 1.01 | 1.07 | 1.05 | 0.89 |
| Q93008 | Probable ubiquitin carboxyl-<br>terminal hydrolase FAF-X      | USP9X    | 9  | 5.1  | 0     | 10.16 | 0.64 | 0.96 | 1.63 | 1.08 | 1.18 | 1.12 | NaN  | 1.43 | 0.86 |
| Q969E4 | Transcription elongation factor A<br>protein-like 3           | TCEAL3   | 1  | 12   | 0     | 22.63 | 0.99 | 0.83 | 1.05 | NaN  | NaN  | NaN  | 0.89 | NaN  | 1.00 |
| Q969G5 | Protein kinase C delta-binding<br>protein                     | PRKCDBP  | 4  | 18.8 | 0     | 5.618 | 1.33 | NaN  | 1.09 | NaN  | 1.22 | 1.58 | NaN  | NaN  | 0.80 |
| Q969H8 | Myeloid-derived growth factor                                 | MYDGF    | 4  | 27.2 | 0     | 51.99 | 1.07 | 1.07 | 1.10 | 1.02 | 0.97 | 0.88 | 1.15 | 1.06 | 0.84 |
| Q969U7 | Proteasome assembly chaperone<br>2                            | PSMG2    | 4  | 17.4 | 0     | 3.592 | 0.74 | NaN  | 0.74 | 0.88 | 0.63 | 0.87 | 1.64 | 0.65 | 1.07 |
| Q96A49 | Synapse-associated protein 1                                  | SYAP1    | 3  | 11.1 | 0     | 20.85 | NaN  | NaN  | 0.87 | 0.61 | 3.60 | 0.94 | 1.02 | 0.64 | 0.90 |
| Q96AG4 | Leucine-rich repeat-containing<br>protein 59                  | LRRC59   | 10 | 42.7 | 0     | 146.5 | 1.10 | 1.05 | 1.06 | 1.06 | 0.95 | 1.03 | 0.98 | 0.89 | 1.07 |
| Q96B36 | Proline-rich AKT1 substrate 1<br>ADP-ribosylation factor-like | AKT1S1   | 2  | 11.7 | 0     | 3.99  | NaN  | NaN  | 1.04 | 0.57 | NaN  | 0.86 | 0.84 | 0.74 | 0.85 |
| Q9NVJ2 | protein 8B;ADP-ribosylation<br>factor-like protein 8A         | ARL8B    | 2  | 14   | 0     | 9.157 | 1.21 | 0.96 | 0.92 | NaN  | NaN  | 1.03 | NaN  | NaN  | 0.78 |
| Q96C19 | EF-hand domain-containing<br>protein D2                       | EFHD2    | 11 | 42.5 | 0     | 124.5 | 1.18 | 0.98 | 1.15 | 1.26 | 1.20 | 1.01 | 1.24 | 1.06 | 1.04 |
| Q96C90 | Protein phosphatase 1 regulatory<br>subunit 14B               | PPP1R14B | 3  | 48.3 | 0     | 51.71 | 1.14 | 1.07 | 1.12 | 0.75 | 0.87 | 0.86 | 1.35 | 1.13 | 1.22 |
| Q96CT7 | Coiled-coil domain-containing<br>protein 124                  | CCDC124  | 6  | 30   | 0     | 16.77 | 1.07 | 1.56 | 0.95 | NaN  | 1.37 | 1.18 | 0.63 | NaN  | 0.92 |
| Q96CV9 | Optineurin                                                    | OPTN     | 5  | 14.6 | 0     | 29.42 | NaN  | 0.97 | 0.98 | NaN  | 1.06 | 1.01 | NaN  | NaN  | 0.93 |
| Q96CX2 | BTB/POZ domain-containing<br>protein KCTD12                   | KCTD12   | 3  | 11.4 | 0     | 14.39 | NaN  | NaN  | NaN  | 0.83 | NaN  | 0.99 | NaN  | NaN  | NaN  |
| Q96D71 | RalBP1-associated Eps domain-<br>containing protein 1         | REPS1    | 4  | 5.5  | 0.001 | 2.366 | 1.27 | NaN  | NaN  | NaN  | 1.43 | NaN  | 0.50 | 1.62 | 1.28 |



|        |                                                                                                    |         |    |      |       |       |      |      |      |      |      |      |      |      |      |
|--------|----------------------------------------------------------------------------------------------------|---------|----|------|-------|-------|------|------|------|------|------|------|------|------|------|
| Q96DG6 | Carboxymethylenebutenolidase homolog                                                               | CMBL    | 4  | 20.8 | 0     | 5.456 | 1.06 | 0.92 | 0.71 | NaN  | 0.90 | 0.78 | 0.73 | 0.72 | 0.50 |
| Q96EL3 | 39S ribosomal protein L53, mitochondrial                                                           | MRPL53  | 1  | 13.4 | 1E-03 | 2.269 | 1.08 | 0.72 | 1.08 | NaN  | NaN  | NaN  | NaN  | NaN  | 1.03 |
| Q96FJ2 | Dynein light chain 2, cytoplasmic                                                                  | DYNLL2  | 1  | 49.4 | 0     | 14.34 | 0.83 | NaN  | NaN  | 1.01 | 0.78 | 0.90 | NaN  | NaN  | NaN  |
| Q96FQ6 | Protein S100-A16                                                                                   | S100A16 | 6  | 54.4 | 0     | 14.67 | 1.83 | 1.70 | 1.72 | NaN  | NaN  | 1.39 | NaN  | 0.33 | 1.70 |
| Q96G03 | Phosphoglucomutase-2                                                                               | PGM2    | 9  | 20.1 | 0     | 118.8 | 0.98 | 0.90 | 1.46 | 1.13 | 0.77 | 0.91 | NaN  | 1.48 | 0.84 |
| Q96HC4 | PDZ and LIM domain protein 5                                                                       | PDLIM5  | 8  | 19.5 | 0     | 17.45 | 1.15 | 1.16 | 1.25 | 1.43 | 1.40 | 1.34 | 1.08 | 1.07 | 0.98 |
| Q96HE7 | ERO1-like protein alpha                                                                            | ERO1L   | 16 | 50.2 | 0     | 199.2 | 1.27 | 1.09 | 1.22 | 1.04 | 1.30 | 1.28 | 1.23 | 1.19 | 1.19 |
| Q96HS1 | Serine/threonine-protein phosphatase PGAM5, mitochondrial                                          | PGAM5   | 2  | 6.6  | 0     | 6.559 | 0.95 | 1.05 | 1.29 | 1.13 | NaN  | 1.12 | 1.16 | 1.09 | 0.95 |
| Q96I24 | Far upstream element-binding protein 3                                                             | FUBP3   | 6  | 14.5 | 0     | 5.955 | 0.86 | NaN  | NaN  | 3.55 | NaN  | 0.80 | NaN  | 1.99 | NaN  |
| Q96I99 | Succinyl-CoA ligase [GDP-forming] subunit beta, Alpha/beta hydrolase domain-containing protein 14B | SUCLG2  | 12 | 39.4 | 0     | 41.82 | 0.96 | 0.96 | 1.08 | NaN  | 0.99 | 0.94 | NaN  | NaN  | 0.93 |
| Q96IU4 | PRKC apoptosis WT1 regulator protein                                                               | ABHD14B | 5  | 31.4 | 0     | 10.08 | 0.88 | NaN  | 0.80 | 1.47 | 1.00 | 0.75 | 0.97 | 2.10 | 1.15 |
| Q96IZ0 | Transcription factor BTF3 homolog 4;Transcription factor                                           | PAWR    | 8  | 41.2 | 0     | 183.4 | 1.42 | 1.17 | 1.30 | 1.23 | 1.05 | 0.89 | 1.04 | 0.92 | 1.14 |
| Q96K17 | Cytosolic non-specific Lysophospholipid acyltransferase 7                                          | BTF3L4  | 2  | 36.7 | 0     | 41.8  | 0.58 | 0.86 | 0.45 | 1.22 | 1.40 | 1.33 | 1.00 | 0.97 | NaN  |
| Q96KP4 | Importin-9                                                                                         | CNDP2   | 12 | 39.6 | 0     | 73.86 | 0.90 | 0.94 | 0.88 | 0.71 | 1.00 | 0.88 | NaN  | 0.71 | 0.88 |
| Q96N66 | RNA-binding protein 14                                                                             | MBOAT7  | 8  | 21.2 | 0     | 217.8 | 0.81 | 0.87 | 0.98 | 0.87 | 0.88 | 0.86 | 1.33 | 1.00 | 0.94 |
| Q96P70 | Vacuolar protein sorting-associated protein 35                                                     | IPO9    | 7  | 9.6  | 0     | 34.6  | 1.03 | 0.92 | NaN  | NaN  | 1.04 | NaN  | NaN  | NaN  | 1.01 |
| Q96PK6 | NudC domain-containing protein                                                                     | RBM14   | 3  | 5.7  | 0     | 7.67  | 1.47 | NaN  | NaN  | 0.82 | NaN  | 0.84 | NaN  | NaN  | 1.05 |
| Q96QK1 | RUN and FYVE domain-containing protein 1                                                           | VPS35   | 17 | 26.6 | 0     | 92.16 | 1.21 | 1.20 | 1.16 | 1.02 | 1.05 | 1.00 | 1.06 | 1.41 | 1.21 |
| Q96RS6 | MMS19 nucleotide excision repair protein homolog                                                   | NUDCD1  | 11 | 24.4 | 0     | 41.26 | 1.06 | 0.84 | 0.91 | 0.93 | 0.95 | 0.92 | NaN  | NaN  | 0.92 |
| Q96T51 | Niban-like protein 1                                                                               | RUFY1   | 4  | 11.7 | 0     | 21.31 | NaN  | 0.90 | 1.10 | NaN  | 1.35 | 0.91 | 1.52 | 1.54 | 1.47 |
| Q96T76 | Tubulin-folding cofactor B                                                                         | MMS19   | 5  | 7.1  | 0     | 5.006 | 0.39 | NaN  | 2.36 | NaN  | NaN  | NaN  | NaN  | NaN  | NaN  |
| Q96TA1 | Proteasome subunit beta type-7;Proteasome subunit beta type                                        | FAM129B | 22 | 42   | 0     | 171   | 1.07 | 1.16 | 1.09 | 0.93 | 1.11 | 0.96 | 1.19 | 1.12 | 0.96 |
| Q99426 | Ethanolamine-phosphate cytidyltransferase                                                          | TBCB    | 7  | 38.9 | 0     | 26.2  | 0.93 | 0.94 | 0.95 | NaN  | 0.93 | 0.88 | 1.19 | NaN  | 0.92 |
| Q99436 | Cell division cycle 5-like protein                                                                 | PSMB7   | 6  | 22.7 | 0     | 23.52 | 1.14 | 1.34 | NaN  | 1.21 | 1.34 | 1.37 | 1.42 | 1.15 | 0.98 |
| Q99447 | 26S proteasome non-ATPase regulatory subunit 1                                                     | PCYT2   | 3  | 10.3 | 0     | 42.53 | 0.61 | 0.59 | 0.78 | 0.79 | NaN  | NaN  | NaN  | 0.68 | 0.70 |
| Q99459 | Prefoldin subunit 5                                                                                | CDC5L   | 6  | 11.1 | 0     | 5.361 | NaN  | 0.80 | 1.22 | 0.60 | 0.69 | NaN  | NaN  | NaN  | NaN  |
| Q99460 | Protein deglycase DJ-1                                                                             | PSMD1   | 21 | 29.4 | 0     | 178.6 | 0.99 | 0.96 | 1.08 | 1.14 | 1.06 | 1.37 | 0.81 | 0.96 | 0.93 |
| Q99471 | Synaptic vesicle membrane protein VAT-1 homolog                                                    | PFDN5   | 7  | 59.7 | 0     | 267.6 | 0.96 | 0.80 | 0.90 | 0.74 | 0.99 | 0.93 | 0.62 | 0.78 | 0.83 |
| Q99497 |                                                                                                    | PARK7   | 14 | 79.9 | 0     | 323.3 | 1.02 | 1.04 | 0.99 | 1.08 | 1.07 | 1.07 | 1.00 | 1.02 | 1.05 |
| Q99536 |                                                                                                    | VAT1    | 12 | 43.3 | 0     | 108.8 | 0.67 | 0.75 | 0.79 | 0.88 | 0.95 | 0.80 | 0.77 | 0.73 | 0.71 |

|        |                                                                                                                     |          |    |      |       |       |      |      |      |      |      |      |      |      |      |
|--------|---------------------------------------------------------------------------------------------------------------------|----------|----|------|-------|-------|------|------|------|------|------|------|------|------|------|
| Q99584 | Protein S100-A13<br>Eukaryotic translation initiation factor 3 subunit C;Eukaryotic translation initiation factor 3 | S100A13  | 7  | 55.1 | 0     | 45.64 | 1.13 | 1.11 | 1.07 | 1.06 | 1.07 | 1.22 | 1.09 | 1.12 | 1.30 |
| Q99613 | subunit C-like protein                                                                                              | EIF3C    | 21 | 27.5 | 0     | 120.2 | 1.17 | 1.24 | 1.05 | 0.93 | 1.03 | 1.38 | 0.86 | 0.96 | 1.03 |
| Q99614 | Tetratricopeptide repeat protein 1                                                                                  | TTC1     | 4  | 14.7 | 0     | 3.972 | NaN  | NaN  | NaN  | 1.09 | NaN  | 0.85 | NaN  | NaN  | 0.85 |
| Q99615 | DnaJ homolog subfamily C member 7                                                                                   | DNAJC7   | 5  | 12.8 | 0     | 5.994 | 1.51 | 1.31 | 1.66 | NaN  | 1.01 | 1.33 | NaN  | NaN  | 1.40 |
| Q99714 | 3-hydroxyacyl-CoA dehydrogenase type-2                                                                              | HSD17B10 | 8  | 49.4 | 0     | 111.2 | 0.98 | 0.96 | 0.98 | 1.18 | 0.97 | 1.11 | 1.22 | 0.98 | 0.93 |
| Q99733 | Nucleosome assembly protein 1-like 4                                                                                | NAP1L4   | 7  | 32   | 0     | 146.5 | 0.84 | 1.07 | 1.02 | 1.06 | 0.85 | 0.99 | 0.85 | 0.88 | 1.11 |
| Q99805 | Transmembrane 9 superfamily member 2                                                                                | TM9SF2   | 1  | 2.1  | 0.009 | 1.413 | NaN  | 1.08 | NaN  | NaN  | 0.66 | 1.03 | NaN  | NaN  | 0.97 |
| Q99829 | Copine-1                                                                                                            | CPNE1    | 18 | 37.1 | 0     | 86.01 | 1.02 | 0.92 | 0.92 | 0.91 | 0.91 | 0.89 | 1.03 | 1.13 | 1.09 |
| Q99832 | T-complex protein 1 subunit eta                                                                                     | CCT7     | 24 | 58.7 | 0     | 323.3 | 1.04 | 1.07 | 1.08 | 1.04 | 1.03 | 1.08 | 0.93 | 0.99 | 0.93 |
| Q99961 | Endophilin-A2                                                                                                       | SH3GL1   | 10 | 32.6 | 0     | 27.16 | NaN  | NaN  | 1.14 | 0.86 | 0.84 | 0.95 | 0.89 | 0.93 | NaN  |
| Q9BPX3 | Condensin complex subunit 3                                                                                         | NCAPG    | 5  | 6.6  | 0     | 4.415 | NaN  | 1.02 | 0.89 | NaN  | 1.09 | NaN  | NaN  | NaN  | 0.59 |
| Q9BPX5 | Actin-related protein 2/3 complex subunit 5-like protein                                                            | ARPC5L   | 4  | 58.8 | 0     | 13.7  | 1.19 | 1.07 | 1.29 | 1.05 | 0.97 | 1.26 | 0.96 | 0.95 | 1.06 |
| Q9BQG0 | Myb-binding protein 1A                                                                                              | MYBBP1A  | 14 | 16   | 0     | 46.76 | 0.97 | 1.05 | 0.96 | 0.78 | 0.91 | 1.15 | 1.17 | 0.71 | 1.13 |
| Q9BR76 | Coronin-1B                                                                                                          | CORO1B   | 9  | 27.4 | 0     | 40.08 | 1.16 | NaN  | 0.78 | 0.71 | 1.03 | 1.19 | 1.05 | 0.72 | 0.81 |
| Q9BRA2 | Thioredoxin domain-containing protein 17                                                                            | TXNDC17  | 5  | 43.1 | 0     | 39.19 | 1.18 | 1.11 | 1.19 | 1.11 | 1.08 | 1.02 | 1.23 | 1.18 | 1.20 |
| Q9BRX8 | Redox-regulatory protein FAM213A                                                                                    | FAM213A  | 3  | 15.7 | 0.004 | 1.755 | 0.97 | 0.89 | 0.88 | 0.86 | 0.67 | 1.06 | NaN  | NaN  | NaN  |
| Q9BS26 | Endoplasmic reticulum resident protein 44                                                                           | ERP44    | 7  | 20.9 | 0     | 39.01 | 1.38 | 1.96 | 1.49 | NaN  | 1.17 | 1.36 | NaN  | NaN  | 1.19 |
| Q9BSJ8 | Extended synaptotagmin-1                                                                                            | ESYT1    | 18 | 22.1 | 0     | 154.8 | 0.83 | 0.83 | 0.92 | 0.90 | 0.96 | 0.91 | 0.91 | 0.92 | 1.00 |
| Q9BT78 | COP9 signalosome complex subunit 4                                                                                  | COPS4    | 5  | 18.7 | 0     | 5.045 | NaN  | 1.01 | NaN  | 6.46 | 0.56 | 1.13 | NaN  | NaN  | NaN  |
| Q9BTT0 | Acidic leucine-rich nuclear phosphoprotein 32 family member E                                                       | ANP32E   | 5  | 24.6 | 0     | 162.2 | 1.04 | 1.23 | 0.81 | 0.73 | 0.85 | 1.08 | NaN  | 1.20 | 1.17 |
| Q9BTV4 | Transmembrane protein 43                                                                                            | TMEM43   | 7  | 23.8 | 0     | 62.33 | 0.99 | 0.85 | NaN  | 1.00 | 0.89 | 1.06 | NaN  | NaN  | 1.10 |
| Q9BUF5 | Tubulin beta-6 chain                                                                                                | TUBB6    | 8  | 59.9 | 0     | 304.9 | 0.60 | 1.01 | 0.76 | 0.75 | 0.67 | 0.63 | NaN  | 1.07 | 1.15 |
| Q9BV40 | Vesicle-associated membrane protein 8                                                                               | VAMP8    | 4  | 45   | 0     | 12.99 | 0.72 | 0.68 | 0.76 | 0.69 | 0.90 | 0.77 | 0.58 | 0.58 | 0.87 |
| Q9BV86 | N-terminal Xaa-Pro-Lys N-methyltransferase 1;N-terminal Xaa-Pro-Lys N-methyltransferase 1. N-terminally processed   | NTMT1    | 2  | 9.4  | 1E-03 | 2.167 | 0.94 | 1.08 | 1.22 | 0.99 | 0.93 | 0.80 | 1.03 | 0.96 | 1.05 |
| Q9BVC6 | Transmembrane protein 109                                                                                           | TMEM109  | 3  | 12.3 | 0     | 5.785 | 0.97 | 1.08 | 0.98 | 0.99 | 1.26 | 1.31 | 1.60 | 1.23 | 0.90 |
| Q9BVG4 | Protein PBDC1                                                                                                       | PBDC1    | 4  | 21.9 | 0     | 3.377 | 0.70 | 0.97 | NaN  | NaN  | 1.05 | 0.57 | 1.16 | 1.03 | 0.77 |
| Q9BVK6 | Transmembrane emp24 domain-containing protein 9                                                                     | TMED9    | 3  | 15.7 | 0     | 96.99 | 1.46 | 1.17 | 1.06 | 1.03 | 1.39 | 1.27 | 1.77 | 1.37 | 1.36 |

|        |                                                                     |          |    |      |       |       |      |      |      |      |      |      |      |      |      |
|--------|---------------------------------------------------------------------|----------|----|------|-------|-------|------|------|------|------|------|------|------|------|------|
| Q9BW60 | Elongation of very long chain fatty acids protein 1                 | ELOVL1   | 1  | 4.3  | 0     | 13.64 | 0.72 | NaN  | NaN  | 0.79 | 0.71 | 0.99 | NaN  | NaN  | NaN  |
| Q9BWD1 | Acetyl-CoA acetyltransferase, cytosolic                             | ACAT2    | 12 | 50.6 | 0     | 323.3 | 0.74 | 0.74 | 0.66 | 0.80 | 0.87 | 0.82 | 0.98 | 0.99 | 0.98 |
| Q9BX68 | Histidine triad nucleotide-binding protein 2, mitochondrial         | HINT2    | 2  | 21.5 | 0     | 4.774 | 0.98 | NaN  | 1.19 | 0.73 | 1.01 | NaN  | NaN  | NaN  | NaN  |
| Q9BXJ9 | N-alpha-acetyltransferase 15, NatA auxiliary subunit                | NAA15    | 6  | 8.3  | 0     | 24.1  | 0.48 | NaN  | NaN  | 0.93 | 1.12 | 0.94 | NaN  | 0.82 | 0.66 |
| Q9BXP5 | Serrate RNA effector molecule homolog                               | SRRT     | 6  | 10.4 | 0     | 9.477 | 0.87 | 0.89 | NaN  | 1.25 | 0.90 | 1.02 | 0.68 | 1.31 | 1.04 |
| Q9BY32 | Inosine triphosphate pyrophosphatase                                | ITPA     | 5  | 38.7 | 0     | 20.73 | 1.12 | 0.83 | 0.82 | NaN  | 0.68 | 0.98 | NaN  | NaN  | 1.36 |
| Q9BZE4 | Nucleolar GTP-binding protein 1                                     | GTPBP4   | 3  | 7.4  | 0     | 5.088 | NaN  | 0.51 | 0.50 | NaN  | NaN  | NaN  | NaN  | NaN  | NaN  |
| Q9BZL1 | Ubiquitin-like protein 5                                            | UBL5     | 2  | 28.8 | 0.002 | 1.903 | 0.74 | NaN  | 0.61 | NaN  | 1.38 | 2.74 | NaN  | NaN  | 0.85 |
| Q9BZQ8 | Protein Niban                                                       | FAM129A  | 5  | 7.8  | 0     | 4.743 | 1.11 | NaN  | 1.07 | NaN  | NaN  | 1.15 | NaN  | NaN  | 0.99 |
| Q9C002 | Normal mucosa of esophagus-specific gene 1 protein                  | NMES1    | 2  | 32.5 | 0     | 4.77  | 1.05 | 0.92 | 0.87 | 1.00 | 0.59 | 0.84 | 1.98 | 1.52 | 1.09 |
| Q9C0C2 | 182 kDa tankyrase-1-binding protein                                 | TNKS1BP1 | 6  | 5.1  | 0     | 6.961 | 0.80 | 1.22 | NaN  | 1.11 | NaN  | NaN  | NaN  | 1.23 | NaN  |
| Q9GZN8 | UPF0687 protein C20orf27                                            | C20orf27 | 2  | 13.8 | 0.008 | 1.517 | 1.11 | 0.93 | NaN  | 1.05 | NaN  | 1.22 | NaN  | NaN  | 0.87 |
| Q9GZP8 | Immortalization up-regulated protein                                | IMUP     | 2  | 17   | 0     | 12.69 | 0.82 | NaN  | 1.03 | NaN  | NaN  | 0.87 | NaN  | NaN  | NaN  |
| Q9H074 | Polyadenylate-binding protein-interacting protein 1                 | PAIP1    | 3  | 13.4 | 0     | 4.676 | 1.32 | NaN  | 1.27 | 1.12 | 1.48 | 1.06 | NaN  | NaN  | NaN  |
| Q9H0B6 | Kinesin light chain 2;Kinesin light chain 4                         | KLC2     | 2  | 7.7  | 0     | 3.969 | 0.93 | 1.31 | 1.11 | NaN  | 1.82 | 1.27 | NaN  | NaN  | 1.29 |
| Q9H0D6 | 5-3 exoribonuclease 2                                               | XRN2     | 7  | 12.4 | 0     | 13.64 | 1.26 | NaN  | 0.92 | NaN  | 1.27 | 1.52 | 1.27 | 1.68 | 1.36 |
| Q9H0U4 | Ras-related protein Rab-1B                                          | RAB1B    | 3  | 67.7 | 0     | 42.7  | 0.73 | 0.84 | 0.82 | 1.02 | 1.12 | 0.99 | 0.56 | 0.62 | 0.67 |
| Q9H1E3 | Nuclear ubiquitinous casein and cyclin-dependent kinase substrate 1 | NUCKS1   | 3  | 13.2 | 0     | 8.121 | 0.55 | 0.58 | 0.59 | 0.69 | 0.88 | 0.69 | 0.97 | 1.14 | 1.10 |
| Q9H223 | EH domain-containing protein 4                                      | EHD4     | 5  | 14   | 0     | 14.2  | 0.79 | NaN  | NaN  | NaN  | NaN  | NaN  | 1.32 | 1.48 | NaN  |
| Q9H307 | Pinin                                                               | PNN      | 7  | 14.1 | 0     | 10.58 | NaN  | NaN  | NaN  | 1.14 | NaN  | NaN  | 1.00 | 1.38 | NaN  |
| Q9H3H3 | UPF0696 protein C11orf68                                            | C11orf68 | 5  | 19.5 | 0     | 6.508 | 1.06 | NaN  | NaN  | 0.75 | NaN  | 1.01 | 0.79 | 1.68 | 0.69 |
| Q9H3K6 | Bola-like protein 2                                                 | BOLA2    | 5  | 72.1 | 0     | 23.71 | 1.22 | 1.18 | 1.19 | 1.25 | 1.20 | 1.04 | 1.14 | NaN  | 1.20 |
| Q9H3N1 | Thioredoxin-related transmembrane protein 1                         | TMX1     | 6  | 23.6 | 0     | 13.87 | 1.18 | 1.21 | 1.41 | 1.24 | 1.21 | 1.26 | 1.72 | 1.12 | 1.17 |
| Q9H3P7 | Golgi resident protein GCP60                                        | ACBD3    | 4  | 14   | 0     | 15.6  | NaN  | 1.73 | NaN  | NaN  | 1.17 | 1.35 | 0.76 | NaN  | 0.89 |
| Q9H444 | Charged multivesicular body protein 4b                              | CHMP4B   | 6  | 33.9 | 0     | 244.6 | 1.47 | 1.26 | 1.26 | 1.19 | 1.21 | 1.01 | 1.26 | 0.97 | 1.07 |
| Q9H488 | GDP-fucose protein O-fucosyltransferase 1                           | POFUT1   | 5  | 23.7 | 0     | 18.73 | 1.13 | 1.33 | 1.22 | 1.01 | 1.34 | 1.31 | NaN  | NaN  | 0.90 |
| Q9H4A4 | Aminopeptidase B                                                    | RNPEP    | 14 | 28.8 | 0     | 186.1 | 0.97 | 1.31 | 1.28 | NaN  | NaN  | NaN  | 1.21 | 1.11 | 1.42 |
| Q9H4L5 | Oxysterol-binding protein-related protein 3                         | OSBPL3   | 10 | 16   | 0     | 41.37 | 0.93 | 1.00 | 1.06 | NaN  | NaN  | 0.96 | 0.80 | NaN  | 0.91 |
| Q9H4M9 | EH domain-containing protein 1                                      | EHD1     | 17 | 51.3 | 0     | 258   | 0.92 | 0.98 | 0.89 | 0.96 | 0.97 | 1.05 | 1.03 | 0.92 | 0.93 |

|        |                                                                         |          |    |      |       |       |      |      |      |      |      |      |      |      |      |      |
|--------|-------------------------------------------------------------------------|----------|----|------|-------|-------|------|------|------|------|------|------|------|------|------|------|
| Q9H6S3 | Epidermal growth factor receptor kinase substrate 8-like protein 2      | EPS8L2   | 15 | 36.6 | 0     | 307.5 | 1.05 | 0.87 | 0.85 | 0.89 | 0.78 | 0.93 | NaN  | NaN  | 1.10 |      |
| Q9H993 | Protein-glutamate O-methyltransferase                                   | ARMT1    | 6  | 21.8 | 0     | 30.22 | 1.05 | 1.12 | 0.96 | NaN  | 0.99 | 1.18 | NaN  | 1.12 | 1.13 |      |
| Q9H9B4 | Sideroflexin-1                                                          | SFXN1    | 7  | 36.6 | 0     | 19.15 | 0.80 | 0.98 | 0.67 | 0.99 | 1.66 | 0.91 | 0.49 | 0.53 | 1.02 |      |
| Q9H9H4 | Vacuolar protein sorting-associated protein 37B                         | VPS37B   | 2  | 10.9 | 0     | 4.058 | NaN  | 0.40 | 0.61 | NaN  | NaN  | NaN  | NaN  | NaN  | NaN  |      |
| Q9HAV4 | Exportin-5                                                              | XPO5     | 9  | 10.6 | 0     | 26.49 | 0.86 | 0.80 | 0.77 | 1.14 | NaN  | 0.97 | 1.03 | 1.01 | 1.12 |      |
| Q9HAV7 | GrpE protein homolog 1, mitochondrial                                   | GRPEL1   | 3  | 15.2 | 0     | 5.862 | 1.72 | 1.46 | 1.24 | NaN  | 0.82 | 1.11 | 0.77 | NaN  | 0.97 |      |
| Q9HB71 | Calcyclin-binding protein                                               | CACYBP   | 20 | 76.3 | 0     | 206.3 | 1.20 | 1.33 | 1.24 | 1.26 | 1.13 | 1.17 | 0.81 | 0.84 | 1.06 |      |
| Q9HC07 | Transmembrane protein 165                                               | TMEM165  | 4  | 20.4 | 0     | 6.481 | 1.02 | 0.75 | 0.99 | NaN  | NaN  | 1.06 | NaN  | NaN  | NaN  |      |
| Q9HDC9 | Adipocyte plasma membrane-associated protein                            | APMAP    | 12 | 40.6 | 0     | 84.43 | 0.92 | 0.88 | 0.96 | 1.00 | 1.06 | 0.95 | 0.96 | 0.89 | 0.78 |      |
| Q9NP97 | Dynein light chain roadblock-type 1;Dynein light chain roadblock-type 2 | DYNLRB1  | 6  | 83.3 | 0     | 32.15 | 1.01 | 1.23 | 0.90 | 0.61 | NaN  | 1.12 | NaN  | NaN  | 1.19 |      |
| Q9NPQ8 | Synembryn-A                                                             | RIC8A    | 6  | 13.9 | 0     | 20.89 | 0.81 | 1.01 | NaN  | NaN  | NaN  | 0.94 | NaN  | NaN  | 0.60 |      |
| Q9NQ50 | 39S ribosomal protein L40, mitochondrial                                | MRPL40   | 1  | 7.8  | 0.002 | 1.983 | NaN  | 0.81 | 1.13 | NaN  | NaN  | NaN  | NaN  | NaN  | NaN  |      |
| Q9NQC3 | Reticulon-4                                                             | RTN4     | 2  | 14.8 | 0     | 323.3 | 1.12 | 0.97 | 0.98 | 0.98 | 1.25 | 1.10 | 0.87 | 1.06 | 1.02 |      |
| Q9NQG5 | Regulation of nuclear pre-mRNA domain-containing protein 1B             | RPRD1B   | 5  | 22.7 | 0     | 36.25 | 1.22 | 1.03 | NaN  | NaN  | 1.21 | 1.09 | NaN  | NaN  | 0.95 |      |
| Q9NQR4 | Omega-amidase NIT2                                                      | NIT2     | 5  | 21   | 0     | 19.37 | 1.81 | NaN  | NaN  | NaN  | NaN  | NaN  | NaN  | 1.51 | NaN  | 1.69 |
| Q9NQW6 | Actin-binding protein anillin                                           | ANLN     | 15 | 16.5 | 0     | 104.1 | 0.81 | 0.99 | 1.03 | NaN  | 1.53 | 1.50 | NaN  | NaN  | 0.72 |      |
| Q9NR12 | PDZ and LIM domain protein 7                                            | PDLIM7   | 7  | 17.3 | 0     | 6.777 | NaN  | NaN  | 3.16 | NaN  | 0.99 | 0.89 | NaN  | NaN  | 2.03 |      |
| Q9NR30 | Nucleolar RNA helicase 2                                                | DDX21    | 6  | 12.4 | 0     | 53.19 | NaN  | NaN  | NaN  | NaN  | 1.39 | 1.01 | NaN  | 0.60 | 0.96 |      |
| Q9NR31 | GTP-binding protein SAR1a                                               | SAR1A    | 7  | 42.9 | 0     | 47.6  | 1.11 | 0.69 | 0.79 | 1.05 | 1.18 | 1.02 | 0.97 | 1.07 | 0.92 |      |
| Q9NR45 | Sialic acid synthase                                                    | NANS     | 9  | 36.5 | 0     | 99.79 | 0.95 | 0.84 | 0.80 | 1.41 | 1.25 | 1.11 | 1.00 | 0.97 | 0.87 |      |
| Q9NRN7 | L-aminoadipate-semialdehyde dehydrogenase-                              | AASDHPP' | 3  | 12.6 | 0     | 37.1  | 0.80 | NaN  | 0.43 | 0.74 | 0.91 | 0.91 | 0.87 | 0.94 | 0.83 |      |
| Q9NRX4 | phosphopantetheinyl transferase 14 kDa phosphohistidine phosphatase     | PHPT1    | 3  | 37.6 | 0     | 59.16 | 1.16 | 1.15 | 1.19 | 1.10 | 1.12 | 1.04 | 1.20 | 0.96 | 1.01 |      |
| Q9NS69 | Mitochondrial import receptor subunit TOM22 homolog                     | TOMM22   | 5  | 66.2 | 0     | 31.81 | 0.90 | 0.75 | 0.94 | 0.68 | 1.02 | 0.97 | NaN  | 0.40 | 0.72 |      |
| Q9NSD9 | Phenylalanine--tRNA ligase beta subunit                                 | FARSB    | 9  | 15.4 | 0     | 21.1  | 0.81 | 0.94 | 0.98 | 0.93 | 1.03 | 0.93 | 0.64 | 0.92 | 0.99 |      |
| Q9NSE4 | Isoleucine--tRNA ligase, mitochondrial                                  | IARS2    | 15 | 20.3 | 0     | 26.7  | 0.95 | 0.76 | 0.70 | 1.04 | 0.88 | 0.85 | NaN  | NaN  | 0.92 |      |
| Q9NTZ6 | RNA-binding protein 12                                                  | RBM12    | 2  | 2.4  | 0.008 | 1.531 | NaN  | 2.03 | NaN  | 1.01 | 0.97 | 1.12 | 2.03 | NaN  | 0.70 |      |
| Q9NUQ6 | SPATS2-like protein                                                     | SPATS2L  | 9  | 25.8 | 0     | 31.94 | 1.08 | 0.56 | 0.65 | 0.59 | 0.54 | 0.41 | 0.96 | 0.81 | 0.77 |      |
| Q9NUQ9 | Protein FAM49B                                                          | FAM49B   | 9  | 45.4 | 0     | 53.41 | 1.22 | 1.11 | 1.25 | 1.00 | 0.98 | 1.14 | 0.72 | 0.78 | 1.24 |      |
| Q9NV17 | ATPase family AAA domain-containing protein 3A                          | ATAD3A   | 9  | 18.5 | 0     | 49.45 | 1.30 | 0.89 | 1.67 | 1.32 | 1.22 | 1.16 | 1.10 | 1.12 | 0.62 |      |
| Q9NVZ3 | Adaptin ear-binding coat-associated protein 2                           | NECAP2   | 4  | 26.6 | 0     | 11.47 | 1.45 | 1.00 | NaN  | NaN  | 1.03 | 1.26 | NaN  | NaN  | 0.87 |      |

|        |                                                                                           |          |    |      |       |       |      |      |      |      |      |      |      |      |      |
|--------|-------------------------------------------------------------------------------------------|----------|----|------|-------|-------|------|------|------|------|------|------|------|------|------|
| Q9NWW4 | UPF0587 protein C1orf123                                                                  | C1orf123 | 4  | 40   | 0     | 17.26 | 1.14 | 0.82 | 1.14 | 0.61 | 0.95 | NaN  | NaN  | 1.05 | 1.50 |
| Q9NX40 | OCIA domain-containing protein                                                            | OCIAD1   | 2  | 11.4 | 0     | 8.876 | NaN  | 0.77 | NaN  | NaN  | 1.01 | 1.32 | NaN  | NaN  | NaN  |
| Q9NXG2 | THUMP domain-containing protein 1                                                         | THUMPD1  | 1  | 4.5  | 0     | 4.405 | 0.73 | 0.94 | 1.09 | 0.76 | NaN  | NaN  | 0.77 | NaN  | 1.07 |
| Q9NY12 | H/ACA ribonucleoprotein complex subunit 1                                                 | GAR1     | 1  | 8.3  | 0     | 5.417 | NaN  | 0.97 | 0.98 | NaN  | 0.95 | 0.92 | 0.95 | 1.00 | NaN  |
| Q9NYL9 | Tropomodulin-3                                                                            | TMOD3    | 12 | 52   | 0     | 116.8 | 1.09 | 0.89 | 0.96 | 1.19 | 0.91 | 1.15 | NaN  | 1.29 | 1.16 |
| Q9NYU2 | UDP-glucose:glycoprotein glucosyltransferase 1                                            | UGGT1    | 4  | 3.7  | 0     | 3.096 | 0.85 | 1.08 | 0.99 | NaN  | NaN  | 0.98 | NaN  | NaN  | 0.58 |
| Q9NZ01 | Very-long-chain enoyl-CoA reductase                                                       | TECR     | 5  | 14.9 | 0     | 23.66 | 0.80 | 0.82 | 0.88 | 0.95 | 0.82 | 0.89 | 0.74 | NaN  | 0.75 |
| Q9NZB2 | Constitutive coactivator of PPAR-gamma-like protein 1                                     | FAM120A  | 9  | 11.9 | 0     | 56.65 | 0.99 | 1.11 | 1.25 | 1.11 | 1.09 | 1.02 | 1.17 | NaN  | 1.02 |
| Q9NZL4 | Hsp70-binding protein 1                                                                   | HSPBP1   | 2  | 11.7 | 0     | 26.28 | NaN  | NaN  | NaN  | NaN  | 1.11 | 1.14 | NaN  | NaN  | NaN  |
| Q9NZL9 | Methionine adenosyltransferase 2 subunit beta                                             | MAT2B    | 2  | 6.9  | 0.003 | 1.879 | NaN  | NaN  | 0.85 | 0.67 | 0.47 | NaN  | 0.95 | NaN  | 0.92 |
| Q9NZM1 | Myoferlin                                                                                 | MYOF     | 84 | 52.6 | 0     | 323.3 | 0.72 | 0.75 | 0.83 | 0.90 | 0.89 | 0.89 | 0.70 | 0.88 | 1.02 |
| Q9NZN4 | EH domain-containing protein 2                                                            | EHD2     | 12 | 35.7 | 0     | 42.68 | 0.70 | 0.89 | 0.59 | 0.94 | 0.85 | 0.78 | 1.08 | 0.70 | 0.94 |
| Q9P035 | Very-long-chain (3R)-3-hydroxyacyl-CoA dehydratase 3                                      | HACD3    | 4  | 18.8 | 0     | 10.81 | 0.69 | 0.54 | NaN  | 1.14 | 0.71 | 0.76 | 1.20 | 0.84 | 1.06 |
| Q9P0L0 | Vesicle-associated membrane protein-associated protein A                                  | VAPA     | 13 | 61   | 0     | 144.2 | 0.97 | 0.85 | 1.00 | 0.90 | 1.07 | 0.98 | 0.65 | 0.81 | 0.62 |
| Q9P1F3 | Costars family protein ABRACL                                                             | ABRACL   | 3  | 43.2 | 0     | 15.93 | 0.89 | 1.03 | NaN  | NaN  | 1.03 | 1.05 | 1.19 | 1.19 | 1.25 |
| Q9P258 | Protein RCC2                                                                              | RCC2     | 2  | 6.1  | 0     | 2.925 | NaN  | NaN  | 1.41 | NaN  | NaN  | NaN  | 0.98 | 0.83 | NaN  |
| Q9P287 | BRCA2 and CDKN1A-interacting protein                                                      | BCCIP    | 3  | 18.2 | 0     | 11.54 | NaN  | 0.98 | NaN  | NaN  | NaN  | 0.81 | 0.84 | NaN  | 1.47 |
| Q9P2E9 | Ribosome-binding protein 1                                                                | RRBP1    | 42 | 36   | 0     | 323.3 | 0.92 | 0.87 | 0.92 | 0.93 | 0.81 | 0.86 | 0.63 | 0.90 | 0.86 |
| Q9P2J5 | Leucine--tRNA ligase, Dolichol-phosphate                                                  | LARS     | 23 | 27.7 | 0     | 142.2 | 1.02 | 0.92 | 0.93 | 0.67 | 0.82 | 0.96 | NaN  | 0.85 | 1.10 |
| Q9P2X0 | mannosyltransferase subunit 3                                                             | DPM3     | 2  | 23.9 | 0.002 | 2.029 | 1.34 | 1.36 | 0.85 | NaN  | NaN  | NaN  | NaN  | NaN  | 1.00 |
| Q9UBB4 | Ataxin-10                                                                                 | ATXN10   | 7  | 17.5 | 0     | 106.2 | NaN  | 0.90 | 1.03 | 1.08 | 1.20 | 1.04 | NaN  | 0.61 | 0.76 |
| Q9UBE0 | SUMO-activating enzyme subunit 1;SUMO-activating enzyme subunit 1. N-terminally processed | SAE1     | 10 | 29.8 | 0     | 27.25 | 1.28 | 1.98 | 1.08 | 0.98 | 1.31 | 1.06 | 1.10 | 1.00 | 1.03 |
| Q9UBF2 | Coatomer subunit gamma-2                                                                  | COPG2    | 8  | 18.9 | 0     | 19.74 | NaN  | NaN  | 1.18 | NaN  | 0.83 | 0.85 | NaN  | NaN  | NaN  |
| Q9UBI6 | Guanine nucleotide-binding protein G(I)/G(S)/G(O) subunit gamma-12                        | GNG12    | 3  | 56.9 | 0     | 96.94 | 0.93 | 1.03 | 0.80 | 1.08 | 1.02 | 0.99 | 1.07 | 0.94 | 1.18 |
| Q9UBM7 | 7-dehydrocholesterol reductase                                                            | DHCR7    | 4  | 10.5 | 0     | 8.396 | NaN  | NaN  | NaN  | 0.98 | 1.09 | 0.86 | 1.86 | 1.43 | NaN  |
| Q9UBQ7 | Glyoxylate reductase/hydroxypyruvate reductase                                            | GRHPR    | 8  | 40.2 | 0     | 100.4 | 0.85 | 0.62 | 0.79 | NaN  | 0.94 | 0.71 | NaN  | NaN  | 0.82 |
| Q9UBR2 | Cathepsin Z                                                                               | CTSZ     | 3  | 12.9 | 0     | 67.04 | 1.38 | 1.05 | 1.49 | 1.14 | 1.97 | 1.21 | 1.26 | 1.15 | 1.04 |
| Q9UBS4 | DnaJ homolog subfamily B member 11                                                        | DNAJB11  | 4  | 17.6 | 0     | 4.818 | NaN  | NaN  | 1.17 | NaN  | NaN  | NaN  | 1.05 | 0.97 | NaN  |
| Q9UBT2 | SUMO-activating enzyme subunit 2                                                          | UBA2     | 9  | 22.8 | 0     | 13.46 | 0.78 | 0.79 | 0.71 | 0.79 | 1.33 | 1.10 | 1.10 | 0.73 | 0.90 |

|        |                                                                                                        |          |    |      |       |       |      |      |      |      |      |      |      |      |      |
|--------|--------------------------------------------------------------------------------------------------------|----------|----|------|-------|-------|------|------|------|------|------|------|------|------|------|
| Q9UDY2 | Tight junction protein ZO-2                                                                            | TJP2     | 13 | 16.6 | 0     | 93.64 | 1.69 | 1.37 | NaN  | 1.29 | 1.13 | NaN  | 1.20 | NaN  | NaN  |
| Q9UG63 | ATP-binding cassette sub-family F member 2                                                             | ABCF2    | 4  | 7.4  | 0     | 6.417 | 1.26 | 1.16 | 1.11 | NaN  | 0.74 | 1.46 | NaN  | 0.89 | 1.07 |
| Q9UGI8 | Testin                                                                                                 | TES      | 18 | 51.5 | 0     | 78.51 | 1.10 | 1.35 | 1.10 | NaN  | 0.97 | 1.24 | 1.30 | NaN  | 1.01 |
| Q9UH65 | Switch-associated protein 70                                                                           | SWAP70   | 12 | 20.5 | 0     | 16.95 | 0.89 | 0.97 | 0.83 | 1.27 | 1.18 | 1.02 | 1.12 | 1.30 | 1.05 |
| Q9UH99 | SUN domain-containing protein 2                                                                        | SUN2     | 3  | 8.6  | 0     | 5.686 | NaN  | 1.92 | 1.77 | NaN  | NaN  | 1.42 | NaN  | NaN  | 1.41 |
| Q9UHB9 | Signal recognition particle subunit SRP68                                                              | SRP68    | 11 | 25.2 | 0     | 116.8 | 0.89 | 0.78 | 0.98 | 0.98 | 0.90 | 0.85 | 0.96 | 0.78 | 0.56 |
| Q9UHD1 | Cysteine and histidine-rich domain-containing protein 1                                                | CHORDC1  | 9  | 47.9 | 0     | 52.51 | 1.64 | 1.86 | 1.65 | 1.42 | 1.70 | 1.65 | 0.88 | 0.69 | 0.82 |
| Q9UHD8 | Septin-9                                                                                               | 9-Sep    | 16 | 43.3 | 0     | 323.3 | 1.01 | 1.06 | 1.04 | 1.03 | 1.05 | 1.00 | 1.10 | 1.03 | 1.05 |
| Q9UHD9 | Ubiquilin-2                                                                                            | UBQLN2   | 3  | 14.7 | 0     | 126.8 | 1.18 | 0.76 | 0.71 | 0.83 | 1.09 | 1.12 | NaN  | NaN  | 0.56 |
| Q9UHV9 | Prefoldin subunit 2                                                                                    | PFDN2    | 7  | 51.9 | 0     | 74.29 | 1.04 | 1.11 | 1.19 | 1.06 | 1.01 | 1.17 | 1.32 | 0.93 | 1.09 |
| Q9UHY7 | Enolase-phosphatase E1                                                                                 | ENOPH1   | 2  | 13   | 0     | 22.77 | 0.63 | 0.75 | 0.82 | NaN  | NaN  | 1.23 | 0.97 | NaN  | 1.51 |
| Q9UI47 | Catenin alpha-3                                                                                        | CTNNA3   | 1  | 3.5  | 0     | 4.184 | 0.93 | 0.95 | 0.94 | NaN  | 1.06 | 1.02 | 0.97 | NaN  | 1.00 |
| Q9UJS0 | Calcium-binding mitochondrial carrier protein Aralar2                                                  | SLC25A13 | 4  | 7.9  | 5E-04 | 2.831 | 1.02 | 1.09 | 0.91 | NaN  | NaN  | NaN  | NaN  | NaN  | NaN  |
| Q9UJU6 | Drebrin-like protein                                                                                   | DBNL     | 10 | 32.3 | 0     | 134.9 | 0.95 | 0.86 | 0.89 | 0.93 | 0.92 | 1.02 | 1.25 | NaN  | 1.14 |
| Q9UJZ1 | Stomatin-like protein 2, mitochondrial                                                                 | STOML2   | 9  | 49.4 | 0     | 41.07 | 1.47 | 0.93 | 0.97 | 1.35 | 1.06 | 0.93 | 1.61 | 1.08 | 1.30 |
| Q9UK76 | Hematological and neurological expressed 1 protein;Hematological and neurological expressed 1 protein. | HN1      | 5  | 64.9 | 0     | 290.3 | 1.28 | 1.29 | 1.44 | 0.76 | 1.13 | 0.93 | 1.46 | 1.55 | 1.53 |
| Q9UKY7 | Protein CDV3 homolog                                                                                   | CDV3     | 7  | 54.3 | 0     | 202.5 | 1.24 | 1.20 | 1.27 | 1.52 | 1.17 | 1.00 | 1.13 | 1.06 | 0.81 |
| Q9UL25 | Ras-related protein Rab-21                                                                             | RAB21    | 7  | 39.1 | 0     | 33.53 | 1.22 | 1.36 | 1.20 | NaN  | 1.08 | 2.39 | NaN  | NaN  | 0.76 |
| Q9ULC4 | Malignant T-cell-amplified sequence 1                                                                  | MCTS1    | 4  | 40.9 | 0     | 23.36 | NaN  | 0.70 | 0.68 | 0.67 | 0.81 | 0.66 | 0.92 | 0.50 | NaN  |
| Q9ULC5 | Long-chain-fatty-acid--CoA ligase 5                                                                    | ACSL5    | 2  | 3.4  | 0     | 3.279 | 0.59 | NaN  | NaN  | NaN  | 1.16 | 1.21 | NaN  | NaN  | NaN  |
| Q9ULV4 | Coronin-1C                                                                                             | CORO1C   | 3  | 47.9 | 0     | 225.9 | 0.80 | 0.82 | 0.83 | 0.81 | 0.87 | 0.90 | 0.85 | 0.95 | 0.89 |
| Q9ULW0 | Targeting protein for Xklp2                                                                            | TPX2     | 1  | 2.1  | 0     | 17.33 | NaN  | NaN  | 0.33 | 1.03 | 0.85 | 1.48 | 0.33 | 0.39 | 0.12 |
| Q9UM22 | Mammalian ependymin-related protein 1                                                                  | EPDR1    | 1  | 4.9  | 0.008 | 1.495 | NaN  | 0.50 | 0.44 | 0.40 | NaN  | 0.58 | NaN  | NaN  | NaN  |
| Q9UMS4 | Pre-mRNA-processing factor 19                                                                          | PRPF19   | 12 | 35.1 | 0     | 163.5 | 1.24 | 1.00 | 1.09 | 0.95 | 0.87 | 0.87 | 1.01 | 0.97 | 0.90 |
| Q9UMX0 | Ubiquilin-1                                                                                            | UBQLN1   | 2  | 16.3 | 0     | 10.82 | NaN  | NaN  | NaN  | 1.18 | 1.17 | 1.03 | NaN  | NaN  | NaN  |
| Q9UMX5 | Neudesin                                                                                               | NENF     | 4  | 27.9 | 0     | 3.428 | NaN  | NaN  | NaN  | 1.03 | NaN  | 1.78 | 0.72 | NaN  | NaN  |
| Q9UN86 | Ras GTPase-activating protein-binding protein 2                                                        | G3BP2    | 7  | 20.7 | 0     | 8.231 | 1.40 | 1.20 | 1.27 | 1.20 | 1.28 | 1.13 | 1.07 | 0.87 | 0.88 |
| Q9UNF0 | Protein kinase C and casein kinase substrate in neurons                                                | PAC SIN2 | 9  | 21   | 0     | 6.422 | 1.14 | 1.13 | 0.91 | 1.15 | 1.00 | 1.20 | 1.01 | 1.37 | 0.94 |
| Q9UNF1 | protein 2                                                                                              |          |    |      |       |       |      |      |      |      |      |      |      |      |      |
| Q9UNF1 | Melanoma-associated antigen D2                                                                         | MAGED2   | 10 | 23.8 | 0     | 33.29 | 1.08 | NaN  | 0.94 | NaN  | NaN  | 0.83 | 0.72 | NaN  | 1.44 |
| Q9UNM6 | 26S proteasome non-ATPase regulatory subunit 13                                                        | PSMD13   | 16 | 55.9 | 0     | 98.97 | 0.97 | 0.91 | 1.03 | 0.95 | 1.31 | 1.02 | 1.53 | 1.09 | 1.02 |
| Q9UNS2 | COP9 signalosome complex subunit 3                                                                     | COPS3    | 4  | 14.2 | 0     | 49.5  | 1.02 | NaN  | 1.26 | NaN  | 1.09 | 1.52 | NaN  | 0.76 | 1.10 |

|        |                                                               |           |    |      |       |       |      |      |      |      |      |      |      |      |      |
|--------|---------------------------------------------------------------|-----------|----|------|-------|-------|------|------|------|------|------|------|------|------|------|
| Q9UNW1 | Multiple inositol polyphosphate phosphatase 1                 | MINPP1    | 1  | 3.1  | 0.001 | 2.717 | NaN  | 1.26 | 1.20 | NaN  | 1.28 | NaN  | NaN  | NaN  | NaN  |
| Q9UNZ2 | NSFL1 cofactor p47                                            | NSFL1C    | 11 | 40.5 | 0     | 80.02 | 1.06 | 1.23 | 1.19 | 1.06 | 0.94 | 0.98 | 1.18 | 0.99 | 1.11 |
| Q9UQ35 | Serine/arginine repetitive matrix protein 2                   | SRRM2     | 8  | 4.3  | 0     | 15.96 | 1.69 | 1.32 | 1.41 | 0.84 | 1.09 | NaN  | 0.85 | 0.88 | 1.45 |
| Q9UQ80 | Proliferation-associated protein 2G4                          | PA2G4     | 23 | 60.4 | 0     | 198.1 | 0.89 | 0.92 | 0.80 | 1.06 | 0.87 | 0.92 | 0.84 | 1.04 | 0.90 |
| Q9UQE7 | Structural maintenance of chromosomes protein 3               | SMC3      | 14 | 16.3 | 0     | 22.14 | NaN  | NaN  | NaN  | 0.96 | 1.29 | NaN  | NaN  | NaN  | NaN  |
| Q9Y224 | UPF0568 protein C14orf166                                     | C14orf166 | 9  | 44.7 | 0     | 33.88 | 1.07 | 1.05 | 1.10 | 0.98 | 0.94 | 1.12 | 0.84 | 0.77 | 1.01 |
| Q9Y230 | RuvB-like 2                                                   | RUVBL2    | 17 | 44.3 | 0     | 81.45 | 1.01 | 0.83 | 0.77 | 0.98 | 1.07 | 0.94 | 0.82 | 0.83 | 0.77 |
| Q9Y237 | Peptidyl-prolyl cis-trans isomerase NIMA-interacting 4        | PIN4      | 2  | 17.6 | 0     | 4.809 | 1.16 | 1.03 | 1.14 | 0.99 | 1.25 | 1.51 | 1.12 | NaN  | NaN  |
| Q9Y265 | RuvB-like 1                                                   | RUVBL1    | 13 | 39.3 | 0     | 64.7  | 0.85 | 0.89 | 0.85 | 0.91 | 0.78 | 0.77 | 0.82 | 0.88 | 0.85 |
| Q9Y266 | Nuclear migration protein nudC                                | NUDC      | 15 | 52.6 | 0     | 42.05 | 1.27 | 1.13 | 1.21 | 1.14 | 0.99 | 1.30 | 1.04 | 1.16 | 1.23 |
| Q9Y281 | Cofilin-2                                                     | CFL2      | 5  | 62   | 0     | 15.19 | 0.80 | 0.85 | NaN  | 0.80 | NaN  | 0.91 | NaN  | NaN  | NaN  |
| Q9Y285 | Phenylalanine--tRNA ligase alpha subunit                      | FARSA     | 6  | 19.3 | 0     | 16.57 | 1.06 | 0.95 | 1.01 | NaN  | 0.93 | 1.02 | NaN  | NaN  | 0.92 |
| Q9Y295 | Developmentally-regulated GTP-binding protein 1               | DRG1      | 3  | 11.2 | 0     | 8.405 | 0.97 | 1.03 | 1.06 | NaN  | NaN  | 0.97 | 1.33 | 1.21 | 0.95 |
| Q9Y2A7 | Nck-associated protein 1                                      | NCKAP1    | 11 | 15   | 0     | 28.87 | 0.87 | 0.97 | 0.79 | 0.95 | 0.99 | 0.84 | NaN  | 0.84 | 0.99 |
| Q9Y2D5 | A-kinase anchor protein 2                                     | AKAP2     | 5  | 8.5  | 0     | 3.645 | NaN  | NaN  | NaN  | NaN  | 2.38 | 4.45 | 0.86 | NaN  | NaN  |
| S6FW71 | GDP-fucose protein O-fucosyltransferase 2                     | POFUT2    | 1  | 6.6  | 0.008 | 1.543 | 1.35 | 0.98 | 0.85 | NaN  | 0.95 | NaN  | NaN  | NaN  | 1.12 |
| Q9Y2Q3 | Glutathione S-transferase kappa                               | GSTK1     | 5  | 28.8 | 0     | 97.45 | 0.64 | 0.35 | NaN  | 0.26 | 0.74 | 0.87 | NaN  | 0.67 | 0.72 |
| Q9Y2R0 | Cytochrome c oxidase assembly factor 3 homolog, mitochondrial | COA3      | 2  | 17.9 | 0.001 | 2.758 | 1.63 | 1.38 | 1.32 | NaN  | NaN  | 1.40 | NaN  | NaN  | NaN  |
| Q9Y2S6 | Translation machinery-associated protein 7                    | TMA7      | 1  | 15.6 | 0.001 | 2.087 | 1.18 | 1.30 | 1.26 | 1.40 | 1.13 | 1.19 | 0.85 | 0.94 | NaN  |
| Q9Y2T2 | AP-3 complex subunit mu-1                                     | AP3M1     | 2  | 12.9 | 0     | 6.401 | 0.88 | NaN  | 1.00 | NaN  | NaN  | 1.37 | NaN  | NaN  | 0.92 |
| Q9Y2V2 | Calcium-regulated heat stable protein 1                       | CARHSP1   | 3  | 42.9 | 0     | 14.44 | 1.01 | 0.81 | 0.94 | 0.91 | 1.07 | 0.94 | NaN  | 0.98 | 0.96 |
| Q9Y2X3 | Nucleolar protein 58                                          | NOP58     | 6  | 16.3 | 0     | 8.944 | 1.11 | 1.16 | NaN  | NaN  | NaN  | NaN  | NaN  | NaN  | 1.46 |
| Q9Y2Z0 | Suppressor of G2 allele of SKP1 homolog                       | SUGT1     | 7  | 28.5 | 0     | 46.75 | NaN  | 1.04 | 1.25 | 0.67 | 1.05 | NaN  | NaN  | 0.86 | NaN  |
| Q9Y305 | Acyl-coenzyme A thioesterase 9, mitochondrial                 | ACOT9     | 14 | 33.9 | 0     | 44.3  | 0.78 | 0.79 | 0.91 | 0.87 | 1.02 | 0.99 | 1.13 | 0.74 | 0.97 |
| Q9Y333 | U6 snRNA-associated Sm-like protein LSM2                      | LSM2      | 4  | 67.4 | 0     | 25.05 | 1.17 | 1.36 | 1.31 | NaN  | NaN  | NaN  | NaN  | NaN  | 1.31 |
| Q9Y376 | Calcium-binding protein 39                                    | CAB39     | 4  | 14.7 | 0     | 6.151 | 1.53 | NaN  | NaN  | NaN  | 0.98 | 0.80 | NaN  | NaN  | 0.81 |
| Q9Y383 | Putative RNA-binding protein                                  |           |    |      |       |       |      |      |      |      |      |      |      |      |      |
| Q9Y383 | Luc7-like 2;Putative RNA-binding protein Luc7-like 1          | LUC7L2    | 10 | 28.8 | 0     | 56.28 | 0.81 | 0.91 | 0.82 | 0.88 | 0.76 | 0.94 | 0.76 | 0.82 | 0.77 |
| Q9Y3A6 | Transmembrane emp24 domain-containing protein 5               | TMED5     | 2  | 10   | 5E-04 | 2.87  | NaN  | NaN  | NaN  | 1.04 | NaN  | NaN  | 0.99 | 0.88 | NaN  |
| Q9Y3B4 | Splicing factor 3B subunit 6                                  | SF3B6     | 4  | 38.4 | 0     | 4.67  | NaN  | NaN  | 0.66 | 0.98 | 0.99 | 1.02 | NaN  | 0.47 | NaN  |
| Q9Y3C1 | Nucleolar protein 16                                          | NOP16     | 1  | 8.4  | 0.007 | 1.672 | 1.30 | 1.17 | NaN  | NaN  | 1.64 | 1.39 | NaN  | NaN  | NaN  |

|        |                                                               |          |     |      |       |       |      |      |      |      |      |      |      |      |      |
|--------|---------------------------------------------------------------|----------|-----|------|-------|-------|------|------|------|------|------|------|------|------|------|
| Q9Y3C6 | Peptidyl-prolyl cis-trans isomerase-like 1                    | PPIL1    | 5   | 35.5 | 0     | 12.29 | 1.02 | 0.95 | 1.01 | 1.31 | 0.99 | 0.88 | 0.98 | 1.31 | 0.78 |
| Q9Y3D0 | Mitotic spindle-associated MMXD complex subunit MIP18         | FAM96B   | 3   | 39.3 | 0     | 20.23 | NaN  | NaN  | 0.83 | NaN  | NaN  | 1.28 | 2.19 | NaN  | 1.71 |
| Q9Y3D6 | Mitochondrial fission 1 protein                               | FIS1     | 2   | 15.8 | 0     | 37.27 | NaN  | NaN  | 1.03 | NaN  | 1.15 | 0.83 | 1.01 | 0.96 | NaN  |
| Q9Y3F4 | Serine-threonine kinase receptor-associated protein           | STRAP    | 17  | 63.4 | 0     | 56.24 | 0.97 | 1.03 | 0.93 | NaN  | 1.20 | 1.22 | 1.03 | 1.01 | 0.98 |
| Q9Y3I0 | tRNA-splicing ligase RtcB                                     | RTCB     | 18  | 46.3 | 0     | 110.9 | 0.87 | 0.66 | 0.97 | NaN  | 1.11 | 0.61 | 1.60 | 0.95 | 0.65 |
| Q9Y3U8 | 60S ribosomal protein L36                                     | RPL36    | 4   | 27.6 | 0     | 8.096 | 0.71 | 0.81 | 0.85 | 0.86 | 0.85 | 0.86 | NaN  | 1.16 | 0.72 |
| Q9Y490 | Talin-1                                                       | TLN1     | 107 | 63.3 | 0     | 323.3 | 1.05 | 1.05 | 1.06 | 1.07 | 1.02 | 1.04 | 1.01 | 0.99 | 1.00 |
| V9GZ56 | U6 snRNA-associated Sm-like protein LSM4                      | LSM4     | 2   | 11.8 | 0     | 3.31  | 0.61 | 0.69 | 0.69 | 1.08 | 0.69 | 0.92 | NaN  | NaN  | 0.49 |
| Q9Y512 | Sorting and assembly machinery component 50 homolog           | SAMM50   | 3   | 8.3  | 0.001 | 2.451 | NaN  | 1.17 | 0.97 | NaN  | 1.66 | 1.13 | NaN  | NaN  | 1.51 |
| Q9Y570 | Protein phosphatase methylesterase 1                          | PPME1    | 13  | 44.6 | 0     | 102.6 | 1.28 | 1.00 | 1.26 | 1.20 | 1.13 | 1.20 | 0.88 | 0.73 | NaN  |
| Q9Y5B9 | FACT complex subunit SPT16                                    | SUPT16H  | 20  | 23   | 0     | 32.52 | 0.85 | 1.10 | 0.87 | 0.69 | 0.99 | 0.88 | 1.36 | 0.94 | 0.90 |
| Q9Y5J1 | U3 small nucleolar RNA-associated protein 18 homolog          | UTP18    | 3   | 9    | 0     | 2.962 | NaN  | 1.41 | NaN  | NaN  | 0.99 | NaN  | 0.77 | NaN  | 1.84 |
| Q9Y5K6 | CD2-associated protein                                        | CD2AP    | 7   | 16.6 | 0     | 17.97 | NaN  | 1.00 | 1.26 | 0.55 | 0.61 | 0.90 | 1.05 | 0.65 | 1.21 |
| Q9Y5L4 | Mitochondrial import inner membrane translocase subunit Tim13 | TIMM13   | 4   | 52.6 | 0     | 12.83 | 1.56 | 1.05 | 0.85 | 1.15 | 1.27 | NaN  | 0.99 | 0.85 | 0.39 |
| Q9Y5S9 | RNA-binding protein 8A                                        | RBM8A    | 4   | 27.6 | 0     | 37.23 | 1.05 | 1.13 | 1.17 | 1.08 | 0.97 | 1.17 | 0.81 | 0.86 | 1.15 |
| Q9Y5X3 | Sorting nexin-5                                               | SNX5     | 2   | 6.7  | 0.008 | 1.559 | 1.18 | 1.03 | 1.05 | NaN  | 0.92 | 1.05 | NaN  | NaN  | 0.88 |
| Q9Y617 | Phosphoserine aminotransferase                                | PSAT1    | 8   | 25.9 | 0     | 7.437 | NaN  | NaN  | 0.71 | 0.72 | 0.39 | 0.52 | 0.52 | 0.62 | 0.69 |
| Q9Y678 | Coatomer subunit gamma-1                                      | COPG1    | 20  | 35.5 | 0     | 112.3 | 1.05 | 1.03 | 1.08 | 0.95 | 1.01 | 1.11 | 1.13 | 1.08 | 1.00 |
| Q9Y696 | Chloride intracellular channel protein 4                      | CLIC4    | 12  | 62.5 | 0     | 228.5 | 1.02 | 0.88 | 1.23 | 0.96 | 0.95 | 1.01 | 0.97 | 1.00 | 1.16 |
| Q9Y6C9 | Mitochondrial carrier homolog 2                               | MTCH2    | 6   | 25.4 | 0     | 30.75 | 1.54 | 1.32 | 1.07 | 0.82 | 1.03 | 1.09 | 0.75 | 0.90 | NaN  |
| Q9Y6G9 | Cytoplasmic dynein 1 light intermediate chain 1               | DYNC1LI1 | 7   | 23.9 | 0     | 15.48 | 1.15 | 0.94 | 1.24 | 0.65 | 0.90 | 0.91 | 1.05 | 1.07 | 0.93 |
| Q9Y6N5 | Sulfide:quinone oxidoreductase, mitochondrial                 | SQRDL    | 8   | 22.4 | 0     | 13.52 | NaN  | NaN  | NaN  | 0.96 | NaN  | 1.06 | NaN  | NaN  | NaN  |
| R4GNH3 | 26S protease regulatory subunit 6A                            | PSMC3    | 17  | 51.8 | 0     | 310.2 | 0.97 | 1.00 | 1.17 | 0.95 | 0.97 | 1.01 | 1.05 | 0.99 | 0.78 |



Supplementary Table S2 The results of phosphoproteomic analysis

| Protein ID | Protein names                                                   | Gene names  | Phospho-site positions | Amino acid | Localization prob | Score | Ratio of TGF- $\beta$ 1+SFN / Con_1 | Ratio of TGF- $\beta$ 1+SFN / Con_2 | Ratio of TGF- $\beta$ 1+SFN / Con_3 | Ratio of SFN / Con_1 | Ratio of SFN / Con_2 | Ratio of SFN / Con_3 | Ratio of TGF- $\beta$ 1/ Con_1 | Ratio of TGF- $\beta$ 1/ Con_2 | Ratio of TGF- $\beta$ 1/ Con_3 |
|------------|-----------------------------------------------------------------|-------------|------------------------|------------|-------------------|-------|-------------------------------------|-------------------------------------|-------------------------------------|----------------------|----------------------|----------------------|--------------------------------|--------------------------------|--------------------------------|
| A0A1B0GWH8 | Battenin                                                        | CLN3        | 12                     | S          | 1                 | 112   | 0.79                                | NaN                                 | NaN                                 | NaN                  | NaN                  | 0.90                 | 1.50                           | 1.06                           | 1.88                           |
| A0A024R4E5 | Vigilin                                                         | HDLBP       | 31                     | S          | 1                 | 228.5 | 1.41                                | 1.32                                | 1.48                                | 1.73                 | 1.36                 | 1.24                 | 1.28                           | 1.42                           | 1.17                           |
| A0A0G2JL47 | Large proline-rich protein                                      | BAT3        | 113                    | S          | 0.997             | 149.4 | NaN                                 | 0.73                                | NaN                                 | 0.92                 | 0.96                 | NaN                  | 1.05                           | 0.82                           | 0.90                           |
| A0A0G2JL47 | Large proline-rich protein                                      | BAT3        | 958                    | S          | 1                 | 123.1 | NaN                                 | 0.85                                | 0.72                                | 0.98                 | NaN                  | NaN                  | 0.94                           | NaN                            | 0.59                           |
| A0A0G2JL47 | Large proline-rich protein                                      | BAT3        | 967                    | S          | 1                 | 261   | 0.80                                | 0.90                                | 0.99                                | 1.13                 | 1.21                 | 1.10                 | 0.88                           | 0.87                           | 0.73                           |
| A0A075B784 | Ubiquitin carboxyl-terminal hydrolase 36                        | USP36       | 742                    | S          | 0.998             | 47.06 | 1.36                                | 1.32                                | 1.04                                | 0.67                 | 1.03                 | 1.01                 | NaN                            | 1.19                           | 1.00                           |
| A0A075B784 | Ubiquitin carboxyl-terminal hydrolase 36                        | USP36       | 807                    | S          | 0.838             | 122.7 | 0.64                                | 0.72                                | NaN                                 | NaN                  | NaN                  | NaN                  | NaN                            | NaN                            | NaN                            |
| A0A087WXA6 | GRIP1-associated protein 1                                      | GRIPAP1     | 271                    | S          | 0.968             | 181.6 | 1.75                                | 1.47                                | 1.30                                | 1.52                 | NaN                  | 0.98                 | 1.01                           | NaN                            | 0.80                           |
| H0YL34     | Synemin                                                         | SYNM        | 758                    | S          | 1                 | 78.91 | 1.35                                | 0.99                                | 1.43                                | 0.81                 | 1.67                 | 0.49                 | 1.90                           | NaN                            | NaN                            |
| H0YL34     | Synemin                                                         | SYNM        | 763                    | S          | 1                 | 78.91 | 1.35                                | 1.95                                | 1.43                                | 1.14                 | 0.87                 | NaN                  | 0.65                           | 0.76                           | NaN                            |
| G3V2E8     | Alpha-actinin-1;Alpha-actinin-2;Alpha-actinin-3;Alpha-actinin-4 | ACTN1       | 75                     | S          | 0.996             | 98.63 | 0.35                                | 0.36                                | NaN                                 | 0.88                 | 0.91                 | 0.79                 | 1.33                           | 1.29                           | 1.41                           |
| A0A087WT18 | Putative monooxygenase p33MONOX                                 | KIAA1191    | 102                    | S          | 0.633             | 95.52 | NaN                                 | NaN                                 | NaN                                 | NaN                  | 0.63                 | 0.59                 | NaN                            | NaN                            | NaN                            |
| A0A087WTB8 | Ubiquitin carboxyl-terminal hydrolase isozyme L3                | UCHL3       | 90                     | S          | 0.666             | 60.35 | NaN                                 | NaN                                 | NaN                                 | 1.22                 | NaN                  | 1.56                 | NaN                            | NaN                            | NaN                            |
| A0A087WTB8 | Ubiquitin carboxyl-terminal hydrolase isozyme L3                | UCHL3       | 94                     | S          | 0.883             | 108.7 | 0.96                                | 0.87                                | NaN                                 | NaN                  | NaN                  | NaN                  | NaN                            | NaN                            | NaN                            |
| A0A087WTP3 | Far upstream element-binding protein 2                          | KHSRP       | 480                    | S          | 1                 | 105.1 | 1.78                                | 1.47                                | 1.67                                | 2.73                 | 2.38                 | 2.67                 | NaN                            | 0.62                           | 0.83                           |
| A0A087WTP3 | Far upstream element-binding protein 2                          | KHSRP       | 181                    | S          | 0.998             | 121.4 | NaN                                 | NaN                                 | 1.46                                | 1.79                 | 1.85                 | 1.69                 | 0.95                           | 1.11                           | 0.96                           |
| A0A087WTQ7 | DNA damage-binding protein                                      | DDB2        | 26                     | S          | 0.851             | 73.27 | NaN                                 | NaN                                 | 0.57                                | 0.83                 | 0.46                 | NaN                  | 1.72                           | 1.62                           | NaN                            |
| Q1JUQ3     | Peptidyl-prolyl cis-trans isomerase FKBP1A                      | FKBP12-Exin | 9                      | S          | 0.999             | 153.9 | NaN                                 | 1.58                                | NaN                                 | 2.63                 | 2.17                 | 2.53                 | 0.84                           | NaN                            | NaN                            |
| A0A087WTS8 | Heat shock 70 kDa protein 4                                     | HSPA4       | 76                     | S          | 1                 | 61.42 | 1.32                                | 1.09                                | 1.38                                | 1.34                 | 1.23                 | NaN                  | NaN                            | NaN                            | NaN                            |
| Q5JWB9     | Transmembrane protein 230                                       | TMEM230     | 24                     | S          | 0.758             | 75.02 | NaN                                 | 3.61                                | NaN                                 | NaN                  | NaN                  | NaN                  | 2.24                           | 3.27                           | NaN                            |
| A0A087WTU3 | Testis-expressed sequence 264 protein                           | TEX264      | 170                    | S          | 0.993             | 172.6 | NaN                                 | NaN                                 | 0.36                                | 0.68                 | 0.63                 | NaN                  | 0.33                           | 0.33                           | 0.32                           |
| A0A087WVR3 | E3 ubiquitin-protein ligase UHRF1                               | UHRF1       | 104                    | S          | 0.856             | 126.4 | 0.68                                | NaN                                 | 0.38                                | NaN                  | NaN                  | NaN                  | 0.59                           | NaN                            | NaN                            |

|            |                                                      |          |      |   |       |       |      |      |      |      |      |      |      |      |      |
|------------|------------------------------------------------------|----------|------|---|-------|-------|------|------|------|------|------|------|------|------|------|
| E9PS08     | UBX domain-containing protein 1                      | UBXN1    | 58   | S | 0.703 | 163.7 | NaN  | NaN  | 1.50 | NaN  | NaN  | 1.70 | 1.11 | 1.29 | 1.18 |
| E7ER32     | MKL/myocardin-like protein 1                         | MKL1     | 454  | S | 0.994 | 172.9 | 1.26 | 1.45 | NaN  | NaN  | NaN  | NaN  | NaN  | NaN  | NaN  |
| A0A0G2JNN3 | Leukocyte receptor cluster member 8                  | LENG8    | 203  | S | 1     | 79.71 | NaN  | 0.94 | 0.87 | 1.12 | 1.24 | 1.20 | 0.74 | 0.71 | 0.74 |
| A0A087WUT6 | Eukaryotic translation initiation factor 5B          | EIF5B    | 1168 | S | 1     | 83.05 | 1.11 | 1.12 | NaN  | 2.18 | 1.34 | 1.56 | NaN  | 0.85 | 0.61 |
| A0A087WUT6 | Eukaryotic translation initiation factor 5B          | EIF5B    | 107  | S | 1     | 122.2 | 0.63 | 0.72 | 0.71 | 1.07 | 0.93 | 0.76 | 0.85 | 0.81 | 0.84 |
| A0A087WUT6 | Eukaryotic translation initiation factor 5B          | EIF5B    | 113  | S | 1     | 430.8 | 1.01 | 0.98 | 0.90 | 0.96 | 0.86 | 0.94 | 1.08 | 1.00 | 1.07 |
| A0A087WUT6 | Eukaryotic translation initiation factor 5B          | EIF5B    | 164  | S | 1     | 113.7 | 0.77 | 0.76 | 1.05 | 0.93 | 0.95 | 0.98 | 0.73 | 0.85 | NaN  |
| A0A087WUT6 | Eukaryotic translation initiation factor 5B          | EIF5B    | 214  | S | 1     | 202.2 | 1.28 | 1.34 | 1.31 | 1.30 | 1.33 | 1.27 | 1.46 | 1.38 | 1.35 |
| A0A087WUT6 | Eukaryotic translation initiation factor 5B          | EIF5B    | 135  | S | 0.999 | 186.9 | 0.70 | 0.71 | 0.68 | 0.35 | 0.44 | 0.36 | 0.43 | 0.62 | 0.61 |
| A0A087WUT6 | Eukaryotic translation initiation factor 5B          | EIF5B    | 137  | S | 1     | 186.9 | 0.70 | 0.71 | 0.68 | 0.97 | 1.02 | 0.94 | 0.64 | 0.47 | 0.61 |
| A0A087X0G7 | NF-kappa-B essential modulator                       | IKBKG    | 379  | S | 1     | 99.53 | 2.27 | NaN  | 1.29 | 1.97 | NaN  | 1.45 | NaN  | NaN  | NaN  |
| A0A087WUZ3 | Spectrin beta chain, non-erythrocytic 1              | SPTBN1   | 2342 | S | 0.77  | 240.2 | 1.12 | NaN  | NaN  | NaN  | NaN  | NaN  | 1.15 | NaN  | 1.11 |
| A0A087WUZ3 | Spectrin beta chain, non-erythrocytic 1              | SPTBN1   | 2343 | S | 0.973 | 268.1 | 0.81 | 1.02 | 1.10 | 1.62 | 1.20 | 1.60 | NaN  | NaN  | NaN  |
| A0A087WUZ3 | Spectrin beta chain, non-erythrocytic 1              | SPTBN1   | 2166 | S | 0.993 | 118.2 | NaN  | 0.65 | NaN  | 0.79 | 0.65 | 0.76 | 0.97 | 1.00 | 0.96 |
| A0A087WUZ3 | Spectrin beta chain, non-erythrocytic 1              | SPTBN1   | 2167 | S | 0.993 | 181.2 | 0.92 | 0.76 | 0.75 | 0.76 | 0.78 | 0.75 | 0.63 | 0.67 | 0.64 |
| A0A087WUZ3 | Spectrin beta chain, non-erythrocytic 1              | SPTBN1   | 2171 | S | 1     | 168.8 | 0.80 | 0.76 | 0.77 | 0.76 | 0.78 | 0.75 | 0.61 | 0.61 | 0.64 |
| A0A087WUZ3 | Spectrin beta chain, non-erythrocytic 1              | SPTBN1   | 2162 | S | 0.851 | 143.3 | NaN  | 0.63 | NaN  | 0.70 | 0.75 | 0.70 | 1.12 | 1.11 | 0.96 |
| A0A087WUZ3 | Spectrin beta chain, non-erythrocytic 1              | SPTBN1   | 2163 | S | 0.971 | 181.2 | 0.63 | 0.61 | 0.60 | 0.70 | 0.63 | 0.76 | 1.07 | 1.02 | 0.96 |
| A0A087WUZ3 | Spectrin beta chain, non-erythrocytic 1              | SPTBN1   | 2104 | S | 1     | 174.7 | 0.67 | 0.72 | 0.61 | 0.72 | 0.73 | 0.70 | 0.89 | 0.86 | 0.91 |
| A0A087WVA8 | Testis-expressed sequence 2 protein                  | TEX2     | 266  | S | 0.992 | 116.8 | NaN  | NaN  | 1.22 | 1.39 | NaN  | 1.35 | 0.83 | 0.90 | NaN  |
| K7EK53     | Eukaryotic translation initiation factor 3 subunit K | EIF3K    | 130  | S | 0.989 | 124.3 | 1.24 | 1.50 | NaN  | 0.96 | 1.36 | NaN  | 0.71 | 0.90 | NaN  |
| A0A087WVF1 | Uncharacterized protein C18orf25                     | C18orf25 | 66   | S | 0.985 | 88.29 | 1.35 | 1.38 | 1.33 | 1.04 | 1.01 | 1.00 | 1.85 | 1.74 | 1.99 |
| A0A087WVF1 | Uncharacterized protein C18orf25                     | C18orf25 | 145  | S | 0.919 | 49.07 | NaN  | NaN  | 2.28 | 2.00 | NaN  | NaN  | 1.91 | 2.04 | 1.93 |
| A0A087WVF7 | Intersectin-2                                        | ITSN2    | 867  | S | 0.988 | 69.58 | NaN  | NaN  | 1.39 | 1.70 | NaN  | 1.49 | NaN  | 1.33 | NaN  |
| A0A087WVF7 | Intersectin-2                                        | ITSN2    | 872  | S | 0.955 | 139.2 | 1.06 | 1.05 | 0.95 | 0.94 | 1.00 | 0.70 | 0.96 | 1.12 | NaN  |

|            |                                                 |              |      |   |       |       |      |      |      |      |      |      |      |      |      |
|------------|-------------------------------------------------|--------------|------|---|-------|-------|------|------|------|------|------|------|------|------|------|
| H7C4X9     | Protein kinase C-binding protein 1              | ZMYND8       | 595  | S | 1     | 60.03 | NaN  | 0.70 | 0.53 | NaN  | NaN  | NaN  | 1.01 | NaN  | 0.89 |
| H7C4X9     | Protein kinase C-binding protein 1              | ZMYND8       | 474  | S | 1     | 78.84 | 1.01 | 1.33 | 1.16 | NaN  | 1.35 | 2.10 | 0.87 | 0.87 | 0.98 |
| H7C4X9     | Protein kinase C-binding protein 1              | ZMYND8       | 417  | S | 0.973 | 111.6 | 0.45 | 0.46 | 0.48 | 0.57 | NaN  | 0.56 | 0.97 | 1.19 | 1.13 |
| H7C4X9     | Protein kinase C-binding protein 1              | ZMYND8       | 683  | S | 0.991 | 82.87 | 0.72 | 0.65 | NaN  | 0.81 | NaN  | 0.83 | 0.97 | 0.96 | 0.98 |
| E7ET14     | Lysine-specific demethylase PHF2                | PHF2         | 95   | S | 0.998 | 76.21 | 1.02 | 0.81 | NaN  | 1.05 | 1.55 | NaN  | 0.89 | 1.30 | 0.97 |
| E7ET14     | Lysine-specific demethylase PHF2                | PHF2         | 269  | S | 0.667 | 75.51 | NaN  | NaN  | 0.23 | 0.72 | 0.93 | 0.76 | 0.78 | 0.38 | NaN  |
| E7ET14     | Lysine-specific demethylase PHF2                | PHF2         | 271  | S | 0.667 | 75.51 | NaN  | NaN  | 0.23 | 0.72 | 0.93 | 0.76 | 0.78 | 0.38 | NaN  |
| E7ET14     | Lysine-specific demethylase PHF2                | PHF2         | 272  | S | 0.667 | 75.51 | NaN  | NaN  | 0.23 | 0.72 | 0.93 | 0.76 | 0.78 | 0.38 | NaN  |
| A0A087WW66 | 26S proteasome non-ATPase regulatory subunit 1  | PSMD1        | 315  | S | 1     | 84.95 | NaN  | 0.95 | 0.95 | 1.04 | 1.08 | 1.22 | 1.01 | 0.98 | 1.26 |
| A0A087WWA3 | Kinesin-like protein;Kinesin-like protein KIF1B | KIF1B        | 1428 | S | 0.94  | 71.56 | 0.48 | NaN  | NaN  | 0.75 | 0.79 | 1.06 | 0.51 | 0.54 | NaN  |
| A0A087WWA3 | Kinesin-like protein;Kinesin-like protein KIF1B | KIF1B        | 1031 | S | 1     | 102.4 | 1.19 | 0.94 | NaN  | NaN  | NaN  | NaN  | 1.67 | 1.20 | 1.38 |
| A0A087WWC8 | Myelin expression factor 2                      | MYEF2        | 17   | S | 0.986 | 152.1 | 0.85 | 1.03 | 0.93 | 1.09 | NaN  | 1.00 | 1.20 | 1.37 | 1.14 |
| A0A087WWF4 | Kanadaplin                                      | SLC4A1A<br>P | 82   | S | 1     | 238   | 0.54 | 0.88 | 0.57 | 0.98 | 0.86 | 0.87 | 0.35 | 0.43 | 0.47 |
| M0R2H0     | Leucine-rich repeat-containing protein C10orf11 | C10orf11     | 9    | S | 1     | 66.54 | NaN  | NaN  | 1.21 | 1.66 | 1.61 | 1.92 | 1.52 | 1.41 | 1.65 |
| M0R2H0     | Leucine-rich repeat-containing protein C10orf11 | C10orf11     | 10   | S | 1     | 66.54 | NaN  | NaN  | 1.21 | 1.66 | 1.61 | 1.92 | 1.52 | 1.41 | 1.65 |
| A0A087WWJ1 | DNA mismatch repair protein Msh6                | MSH6         | 251  | S | 0.996 | 129.6 | NaN  | 0.40 | 0.28 | 0.49 | 0.53 | 0.45 | 0.63 | 0.63 | 0.61 |
| A0A499FJY3 | Putative RNA-binding protein 15                 | RBM15        | 626  | S | 1     | 189.6 | NaN  | 0.87 | 1.08 | 0.84 | 0.91 | NaN  | 1.11 | 1.10 | 0.97 |
| A0A499FJY3 | Putative RNA-binding protein 15                 | RBM15        | 630  | S | 1     | 189.6 | NaN  | 0.87 | 1.08 | 0.84 | 0.91 | NaN  | 1.11 | 1.10 | 0.97 |
| A0A499FJY3 | Putative RNA-binding protein 15                 | RBM15        | 656  | S | 1     | 77.32 | 1.11 | 0.91 | 1.03 | 0.83 | 0.89 | 0.57 | 0.76 | 1.27 | 0.69 |
| A0A499FJY3 | Putative RNA-binding protein 15                 | RBM15        | 250  | S | 1     | 126.7 | 0.87 | 0.88 | 0.90 | NaN  | NaN  | 0.78 | 1.04 | 1.05 | 1.05 |
| A0A499FJY3 | Putative RNA-binding protein 15                 | RBM15        | 213  | S | 0.985 | 82.41 | 0.80 | 0.77 | NaN  | NaN  | NaN  | NaN  | NaN  | NaN  | NaN  |
| A0A499FJY3 | Putative RNA-binding protein 15                 | RBM15        | 215  | S | 0.986 | 82.41 | 0.80 | 0.77 | NaN  | NaN  | NaN  | NaN  | NaN  | NaN  | NaN  |
| A0A499FJY3 | Putative RNA-binding protein 15                 | RBM15        | 697  | S | 0.998 | 56.29 | 0.67 | 0.62 | NaN  | 0.59 | 0.65 | 0.96 | 0.66 | NaN  | 0.87 |
| A0A087WWW3 | B-cell lymphoma/leukemia 10                     | BCL10        | 127  | S | 1     | 151.2 | NaN  | NaN  | 1.60 | 1.60 | NaN  | NaN  | 1.13 | 0.74 | 1.64 |
| A0A087WWY2 |                                                 | FOLR2        | 139  | S | 0.999 | 48.11 | 0.80 | 0.67 | NaN  | NaN  | 0.73 | NaN  | 0.81 | 0.98 | NaN  |



|            |                                                               |               |           |   |       |       |      |      |      |      |      |      |      |      |      |
|------------|---------------------------------------------------------------|---------------|-----------|---|-------|-------|------|------|------|------|------|------|------|------|------|
| G3V2W9     | E2F-associated                                                | EAPP          | 90        | S | 1     | 134.4 | 0.69 | 0.83 | NaN  | NaN  | NaN  | NaN  | NaN  | NaN  | NaN  |
| A0A087X0H9 | RNA-binding protein 26                                        | RBM26         | 127       | S | 0.974 | 58.75 | 0.85 | 1.20 | NaN  | 1.29 | NaN  | NaN  | NaN  | 1.26 | NaN  |
| A0A087X0K9 | Tight junction protein ZO-1                                   | TJP1          | 1525;1611 | S | 0.996 | 173   | 3.08 | 3.16 | 2.60 | 2.08 | 1.82 | 2.12 | 1.28 | 1.12 | 1.20 |
| A0A087X0K9 | Tight junction protein ZO-1                                   | TJP1          | 113;125   | S | 0.999 | 104.5 | 1.88 | 1.13 | 1.92 | 0.73 | 1.42 | 1.44 | 1.52 | NaN  | 1.11 |
| A0A087X0K9 | Tight junction protein ZO-1                                   | TJP1          | 119;131   | S | 0.974 | 93.66 | 1.88 | NaN  | 1.92 | NaN  | NaN  | 1.50 | NaN  | NaN  | NaN  |
| C9JZJ7     | E3 ubiquitin-protein ligase<br>Midline-1                      | MID1          | 96        | S | 0.992 | 135.9 | 1.03 | 0.86 | 0.96 | 0.98 | 1.06 | 0.88 | 1.01 | 1.23 | NaN  |
| A0A087X1M6 | Fibronectin type-III domain-<br>containing protein 3A         | FNDC3A        | 203       | S | 0.961 | 84.31 | 0.57 | NaN  | 0.57 | 0.68 | NaN  | 0.62 | NaN  | 0.59 | 0.52 |
| A0A087X1N7 | Nebulin                                                       | NEB           | 308       | S | 0.855 | 60.44 | 1.07 | 1.21 | NaN  | NaN  | 1.44 | NaN  | NaN  | NaN  | NaN  |
| E9PL71     | Elongation factor 1-delta                                     | EEF1D         | 109       | S | 1     | 238.1 | 0.87 | 0.88 | 0.80 | 1.02 | 1.10 | 1.04 | 0.77 | 0.75 | 0.75 |
| E9PL71     | Elongation factor 1-delta                                     | EEF1D         | 138       | S | 1     | 407.8 | 1.02 | 1.05 | 1.05 | 0.97 | 1.04 | 1.04 | 0.94 | 0.91 | 1.03 |
| A0A087X2B6 | Cell cycle and apoptosis<br>regulator protein 2               | CCAR2         | 138       | S | 0.994 | 100.3 | NaN  | 1.96 | NaN  | NaN  | NaN  | 1.75 | 1.57 | 2.08 | NaN  |
| A0A087X2B6 | Cell cycle and apoptosis<br>regulator protein 2               | CCAR2         | 141       | S | 0.962 | 100.3 | NaN  | 1.96 | NaN  | NaN  | NaN  | 1.75 | 3.68 | 2.15 | NaN  |
| G3V4V5     | E3 ubiquitin-protein ligase<br>HECTD1                         | HECTD1        | 632       | S | 0.828 | 164.3 | 0.88 | 0.90 | 0.87 | 0.95 | NaN  | 0.89 | 0.90 | NaN  | 0.96 |
| A0A088AWL3 | Nuclear receptor corepressor                                  | NCOR1         | 115       | S | 1     | 145   | NaN  | 0.73 | 0.70 | 0.87 | 0.95 | 0.83 | 0.99 | 0.89 | 0.91 |
| A0A088AWL3 | Nuclear receptor corepressor                                  | NCOR1         | 2088      | S | 0.995 | 115.7 | 1.04 | 0.82 | 0.92 | 1.03 | 0.91 | 0.80 | 0.88 | 0.91 | 0.87 |
| A0A088AWL3 | Nuclear receptor corepressor                                  | NCOR1         | 2024      | S | 1     | 83.05 | 0.76 | 0.69 | 0.79 | NaN  | 0.83 | 0.83 | 1.03 | 0.87 | 1.16 |
| A0A088AWL3 | Nuclear receptor corepressor                                  | NCOR1         | 1881      | S | 1     | 94.19 | 0.87 | NaN  | 0.92 | 0.64 | NaN  | 0.74 | 1.23 | NaN  | NaN  |
| A0A088AWL3 | Nuclear receptor corepressor                                  | NCOR1         | 1884      | S | 0.702 | 94.19 | 0.87 | NaN  | 0.92 | 0.64 | NaN  | 0.74 | NaN  | NaN  | NaN  |
| A0A494C0S2 | DNA repair protein<br>complementing XP-G cells                | ERCC5-<br>201 | 384       | S | 0.759 | 129.1 | 0.81 | NaN  | NaN  | 0.77 | 0.65 | 0.86 | NaN  | 1.02 | 1.02 |
| A0A096LP07 | COP9 signalosome complex<br>subunit 1                         | GPS1          | 469       | S | 1     | 187.6 | 1.01 | 0.92 | 0.90 | 0.98 | 1.22 | 1.11 | 1.01 | 1.04 | 0.87 |
| A0A096LP07 |                                                               | GPS1          | 212       | S | 0.742 | 47.13 | NaN  | NaN  | 1.60 | 1.42 | 1.41 | 1.36 | 1.54 | 1.52 | NaN  |
| A0A096LP07 |                                                               | GPS1          | 219       | S | 0.719 | 47.13 | NaN  | NaN  | 1.60 | 1.42 | 1.41 | 1.36 | 1.54 | 1.52 | NaN  |
| A0A096LP25 | Uncharacterized protein<br>FLJ45252                           | AAK1          | 249       | S | 1     | 105   | 0.58 | 0.48 | 0.57 | 0.86 | 0.88 | 0.82 | 0.97 | 1.00 | 0.81 |
| F8W7U3     | WASH complex subunit<br>FAM21C;WASH complex<br>subunit FAM21A | FAM21C        | 498;410   | S | 1     | 131   | 0.85 | 1.15 | 0.67 | 1.53 | 1.22 | 1.74 | 0.74 | 0.78 | 0.58 |
| F8W7U3     | WASH complex subunit<br>FAM21C;WASH complex<br>subunit FAM21A | FAM21C        | 333;245   | S | 1     | 117.8 | 1.17 | 1.09 | NaN  | 0.87 | NaN  | NaN  | 1.12 | 0.97 | 1.10 |
| F8W7U3     | WASH complex subunit<br>FAM21C;WASH complex<br>subunit FAM21A | FAM21C        | 728;640   | S | 1     | 115.5 | NaN  | NaN  | 1.74 | 1.65 | NaN  | NaN  | 0.83 | 0.89 | 0.93 |
| A0A0A0MR88 | WASH complex subunit<br>FAM21C                                | FAM21C        | 539       | S | 1     | 158.4 | 1.17 | 1.26 | 1.15 | 1.24 | NaN  | 1.18 | 1.12 | 1.07 | 1.05 |
| F5H0Q6     | CLK4-associating<br>serine/arginine rich protein              | CLASRP        | 285       | S | 0.996 | 49.08 | 0.87 | NaN  | NaN  | 0.92 | 0.88 | NaN  | NaN  | 0.91 | 0.96 |
| Q5JSD2     | Voltage-dependent anion-<br>selective channel protein 2       | VDAC2         | 115       | S | 0.973 | 104.9 | 0.85 | 0.72 | 0.86 | 1.02 | 1.15 | NaN  | 1.04 | 0.88 | NaN  |
| C9JW01     | Pumilio homolog 2                                             | PUM2          | 136       | S | 1     | 111.1 | 1.16 | NaN  | 1.15 | 1.14 | 1.07 | 0.99 | NaN  | NaN  | 0.92 |

|            |                                                                        |         |     |   |       |       |      |      |      |      |      |      |      |      |      |
|------------|------------------------------------------------------------------------|---------|-----|---|-------|-------|------|------|------|------|------|------|------|------|------|
| C9JW01     | Pumilio homolog 2                                                      | PUM2    | 182 | S | 1     | 130.2 | 1.34 | 1.25 | 1.27 | 1.14 | 1.12 | 1.06 | 1.03 | 1.03 | 1.16 |
| A0A0A0MSK4 | G-protein-signaling modulator                                          | GPSM1   | 492 | S | 0.5   | 111.8 | 0.80 | 0.96 | NaN  | 1.21 | 0.96 | 1.16 | NaN  | 1.44 | 1.31 |
| A0A0A0MSK4 | G-protein-signaling modulator                                          | GPSM1   | 493 | S | 0.545 | 111.8 | 0.80 | 0.96 | NaN  | 1.21 | 0.96 | 1.16 | 1.00 | 1.44 | 1.31 |
| H0YBF7     | Arf-GAP with SH3 domain, ANK repeat and PH domain-containing protein 1 | ASAP1   | 949 | S | 1     | 115.1 | 1.23 | 1.19 | NaN  | 1.03 | 1.25 | NaN  | 1.07 | 0.86 | NaN  |
| H0YBF7     | Arf-GAP with SH3 domain, ANK repeat and PH domain-containing protein 1 | ASAP1   | 538 | S | 1     | 221.3 | 0.74 | 0.83 | 0.88 | 0.79 | 0.76 | 0.70 | 0.95 | 1.04 | 0.95 |
| H0YBF7     | Arf-GAP with SH3 domain, ANK repeat and PH domain-containing protein 1 | ASAP1   | 547 | S | 1     | 144.4 | 0.78 | 0.95 | 0.93 | 1.59 | 1.57 | 1.28 | 0.75 | NaN  | 0.61 |
| H0YBF7     | Arf-GAP with SH3 domain, ANK repeat and PH domain-containing protein 1 | ASAP1   | 829 | S | 1     | 95.09 | 1.61 | 1.41 | 1.35 | 1.32 | 1.44 | 1.39 | 1.31 | NaN  | 1.19 |
| H0YBF7     | Arf-GAP with SH3 domain, ANK repeat and PH domain-containing protein 1 | ASAP1   | 660 | S | 0.998 | 107.2 | 3.41 | NaN  | 2.68 | 3.24 | 3.05 | NaN  | 0.83 | 1.28 | 0.72 |
| H0YBF7     | Arf-GAP with SH3 domain, ANK repeat and PH domain-containing protein 1 | ASAP1   | 664 | S | 1     | 78.67 | 3.41 | 1.70 | 2.30 | 1.85 | 3.05 | NaN  | 1.55 | 1.68 | NaN  |
| A0A0A0MR11 | GPALPP motifs-containing protein 1                                     | GPALPP1 | 138 | S | 1     | 110.3 | NaN  | NaN  | NaN  | NaN  | 0.83 | 0.58 | 0.50 | 0.54 | NaN  |
| A0A0A0MR11 | GPALPP motifs-containing protein 1                                     | GPALPP1 | 139 | S | 1     | 110.3 | NaN  | NaN  | NaN  | NaN  | 0.83 | 0.58 | 0.50 | 0.54 | NaN  |
| A0A0A0MR11 | GPALPP motifs-containing protein 1                                     | GPALPP1 | 103 | S | 1     | 172.8 | 0.92 | 0.82 | NaN  | 0.86 | 0.86 | NaN  | 0.99 | 0.99 | 1.00 |
| A0A0A0MRJ3 | Neuron navigator 1                                                     | NAV1    | 773 | S | 1     | 100.9 | NaN  | 1.45 | 1.88 | 1.09 | 1.18 | 1.15 | NaN  | 2.50 | 2.15 |
| J3QSX6     | Actin-binding LIM protein 1                                            | ABLIM1  | 329 | S | 1     | 119.6 | 1.18 | 1.01 | NaN  | 1.71 | 1.49 | 1.87 | 0.44 | NaN  | 0.43 |
| J3QSX6     | Actin-binding LIM protein 1                                            | ABLIM1  | 89  | S | 1     | 211.7 | 1.85 | 1.74 | 1.75 | 1.51 | 1.53 | 1.40 | 1.83 | 1.60 | 1.76 |
| A0A0A0MRM9 | Nucleolar and coiled-body phosphoprotein 1                             | NOLC1   | 572 | S | 1     | 156.1 | 1.01 | 1.02 | 0.87 | 1.01 | 0.86 | 0.91 | 0.95 | 0.91 | 0.98 |
| A0A0A0MRM9 | Nucleolar and coiled-body phosphoprotein 1                             | NOLC1   | 547 | S | 1     | 95.85 | 0.66 | 0.65 | 0.59 | 0.81 | NaN  | 0.82 | 0.73 | 0.72 | 0.77 |
| A0A0A0MRN0 | Pre-mRNA-splicing factor 38B                                           | PRPF38B | 416 | S | 1     | 76.05 | 1.57 | 1.66 | 1.25 | 1.48 | 1.66 | 1.39 | 1.32 | 1.18 | 1.21 |
| A0A0A0MRN0 | Pre-mRNA-splicing factor 38B                                           | PRPF38B | 418 | S | 1     | 110.1 | 1.15 | 1.00 | 0.95 | 0.91 | 0.77 | 1.18 | 1.07 | 0.82 | 1.40 |
| A0A0A0MRN5 | Opioid growth factor receptor                                          | OGFR    | 485 | S | 0.988 | 107.4 | 0.95 | NaN  | 0.88 | 0.96 | 1.03 | 1.42 | 0.78 | 0.66 | NaN  |
| A0A0A0MRN5 | Opioid growth factor receptor                                          | OGFR    | 465 | S | 0.794 | 142.6 | NaN  | NaN  | 1.20 | NaN  | NaN  | NaN  | 1.08 | NaN  | 1.30 |
| A0A0A0MRN5 | Opioid growth factor receptor                                          | OGFR    | 263 | S | 1     | 76.11 | NaN  | NaN  | NaN  | 1.01 | NaN  | 1.16 | 1.05 | 1.17 | 0.96 |
| A0A0A0MRN5 | Opioid growth factor receptor                                          | OGFR    | 326 | S | 1     | 185   | 1.01 | 1.01 | 1.04 | 1.04 | 1.02 | 1.01 | 1.05 | 1.08 | 1.10 |
| A0A0A0MRP0 | MAP7 domain-containing protein 3                                       | MAP7D3  | 183 | S | 0.604 | 79.31 | NaN  | NaN  | NaN  | 0.98 | 1.07 | NaN  | NaN  | NaN  | NaN  |
| A0A0A0MRP0 | MAP7 domain-containing protein 3                                       | MAP7D3  | 185 | S | 0.806 | 84.57 | 0.64 | 0.88 | 1.04 | NaN  | NaN  | 1.02 | 0.54 | NaN  | NaN  |
| A0A0A0MRP6 | Probable global transcription activator SNF2L1                         | SMARCA1 | 119 | S | 0.96  | 51.77 | 0.49 | 0.51 | 0.63 | NaN  | 0.97 | 0.87 | NaN  | 0.54 | NaN  |

|            |                                                              |          |      |   |       |       |      |      |      |      |      |      |      |      |      |
|------------|--------------------------------------------------------------|----------|------|---|-------|-------|------|------|------|------|------|------|------|------|------|
| A0A0A0MRT2 | WW domain-containing adapter protein with coiled-coil        | WAC      | 8    | S | 1     | 78.1  | 0.71 | 0.73 | 1.00 | 1.15 | 0.99 | 1.31 | NaN  | NaN  | 1.62 |
| A0A0A0MRT2 | WW domain-containing adapter protein with coiled-coil        | WAC      | 359  | S | 1     | 155.6 | 1.21 | 1.01 | 0.86 | 1.14 | 0.95 | 1.02 | 0.72 | 1.03 | 1.00 |
| B6VEX4     | Abl interactor 1                                             | ABI1     | 225  | S | 1     | 81.38 | 1.45 | 1.44 | 1.29 | 1.26 | 1.24 | 1.12 | NaN  | 1.45 | NaN  |
| B6VEX4     | Abl interactor 1                                             | ABI1     | 183  | S | 1     | 132.7 | 0.73 | 0.79 | 0.79 | 1.01 | 1.00 | 0.93 | 0.77 | 0.78 | 0.79 |
| A0A0A0MRW1 | Protein FAM219A                                              | FAM219A  | 86   | S | 1     | 189.9 | 1.06 | 1.46 | NaN  | 1.84 | NaN  | 1.26 | NaN  | 0.82 | 1.11 |
| A0A0A0MSA7 | Eukaryotic translation initiation factor 4 gamma 3           | EIF4G3   | 303  | S | 0.5   | 58.23 | 0.87 | 1.14 | 0.95 | NaN  | NaN  | 0.96 | NaN  | NaN  | NaN  |
| A0A0A0MSA7 | Eukaryotic translation initiation factor 4 gamma 3           | EIF4G3   | 304  | S | 0.5   | 58.23 | 0.87 | 1.14 | 0.95 | NaN  | NaN  | 0.96 | NaN  | NaN  | NaN  |
| A0A0A0MSA7 | Eukaryotic translation initiation factor 4 gamma 3           | EIF4G3   | 494  | S | 1     | 105   | 1.13 | 1.20 | 1.24 | 1.22 | 1.21 | 1.25 | 1.29 | 1.32 | 1.27 |
| B3KPJ4     | Polyhomeotic-like protein 2                                  | PHC2     | 357  | S | 0.768 | 61.35 | NaN  | NaN  | NaN  | 1.21 | 0.92 | NaN  | NaN  | NaN  | NaN  |
| A0A0A0MSK5 | Torsin-1A-interacting protein 1                              | TOR1AIP1 | 33   | S | 1     | 148.9 | 1.42 | 1.24 | 1.81 | 3.30 | 2.60 | 2.74 | 2.35 | 3.16 | 1.75 |
| A0A0A0MSK5 | Torsin-1A-interacting protein 1                              | TOR1AIP1 | 35   | S | 1     | 187.8 | 1.30 | 1.24 | 1.81 | 3.30 | 2.60 | 2.74 | 2.35 | 3.16 | 1.47 |
| A0A0A0MSK5 | Torsin-1A-interacting protein 1                              | TOR1AIP1 | 36   | S | 1     | 187.8 | 1.30 | 1.24 | 1.81 | 3.30 | 2.60 | 2.74 | 2.35 | 3.16 | 1.47 |
| A0A0A0MSK5 | Torsin-1A-interacting protein 1                              | TOR1AIP1 | 22   | S | 0.908 | 65.2  | NaN  | 4.14 | 3.93 | 3.28 | NaN  | NaN  | NaN  | NaN  | NaN  |
| A0A0A0MSL3 | Ubiquitin-conjugating enzyme E2 variant 1                    | UBE2V1   | 102  | S | 1     | 99.83 | 0.77 | 0.83 | 0.63 | 0.96 | 0.93 | 0.70 | 0.84 | 0.88 | 1.17 |
| Q5TBM3     | Heat shock protein 105 kDa                                   | HSPH1    | 73   | S | 1     | 95.62 | NaN  | 1.42 | 1.33 | 1.11 | 1.12 | 1.12 | 0.95 | 0.89 | 0.97 |
| A0A0G2JI50 | Negative elongation factor E                                 | NELFE    | 174  | S | 0.747 | 117.2 | NaN  | 0.83 | 0.73 | NaN  | NaN  | 0.91 | 0.88 | NaN  | 0.52 |
| A0A0G2JI50 | Negative elongation factor E                                 | NELFE    | 176  | S | 0.861 | 122.2 | 0.97 | 0.66 | NaN  | 0.84 | NaN  | 0.54 | 0.80 | 0.81 | 0.92 |
| A0A0G2JI50 | Negative elongation factor E                                 | NELFE    | 115  | S | 1     | 154.2 | 1.65 | 1.66 | NaN  | NaN  | NaN  | NaN  | NaN  | NaN  | NaN  |
| A0A0A0MSU2 | ELM2 and SANT domain-containing protein 1                    | ELMSAN1  | 461  | S | 1     | 88.22 | 0.56 | 0.40 | NaN  | 0.64 | 0.86 | NaN  | 0.68 | NaN  | NaN  |
| Q5TCC6     | Isoleucine--tRNA ligase, cytoplasmic                         | IARS     | 100  | S | 0.964 | 77.22 | NaN  | 1.11 | 1.25 | NaN  | NaN  | 1.73 | NaN  | 0.94 | NaN  |
| A0A0A0MSY4 |                                                              | DOCK9    | 37   | S | 1     | 131.4 | 1.72 | 1.84 | NaN  | NaN  | NaN  | NaN  | NaN  | NaN  | NaN  |
| A0A0A0MT33 | Protein SCAF8                                                | SCAF8    | 695  | S | 0.999 | 203.2 | 0.93 | 0.91 | 0.99 | 1.00 | 1.33 | 1.08 | 1.01 | 1.19 | 1.05 |
| A0A2R8YF38 | Transcription activator BRG1                                 | SMARCA4  | 18   | S | 1     | 62.65 | NaN  | NaN  | NaN  | 1.00 | 1.26 | NaN  | NaN  | 0.87 | NaN  |
| A0A0A0MT60 | Peptidyl-prolyl cis-trans isomerase;FK506-binding protein 15 | FKBP15   | 1139 | S | 1     | 91.59 | 0.95 | 1.02 | 0.80 | 0.74 | 0.73 | NaN  | 0.95 | 1.00 | 0.89 |
| A0A0A0MTR7 | E3 ubiquitin-protein ligase RNF213                           | RNF213   | 1258 | S | 1     | 158.5 | 0.92 | 0.81 | 0.92 | 0.97 | NaN  | 0.58 | 1.08 | 1.03 | 1.07 |
| H3BMG9     | Protein FAM65A                                               | FAM65A   | 310  | S | 1     | 246.3 | 1.09 | 0.99 | 1.04 | 0.77 | 0.83 | 0.77 | 1.53 | 1.47 | 1.52 |
| A0A0A0MTP7 | Protein SCAF11                                               | SCAF11   | 278  | S | 0.605 | 148.3 | NaN  | 0.74 | NaN  | NaN  | NaN  | NaN  | 0.87 | 0.94 | NaN  |
| A0A0A0MTP7 | Protein SCAF11                                               | SCAF11   | 548  | S | 1     | 175.8 | 0.86 | 0.84 | NaN  | 0.94 | 1.03 | 0.82 | 0.99 | 0.83 | 0.99 |
| A0A0A0MTP7 | Protein SCAF11                                               | SCAF11   | 841  | S | 0.5   | 65.59 | 0.73 | NaN  | NaN  | 0.86 | NaN  | 0.67 | 0.69 | NaN  | NaN  |
| A0A0A0MTP7 | Protein SCAF11                                               | SCAF11   | 842  | S | 0.5   | 65.59 | 0.73 | NaN  | NaN  | 0.86 | NaN  | 0.67 | 0.69 | NaN  | NaN  |

|            |                                                                   |            |     |   |       |       |      |      |      |      |      |      |      |      |      |
|------------|-------------------------------------------------------------------|------------|-----|---|-------|-------|------|------|------|------|------|------|------|------|------|
| A0A0A0MTQ8 | Coiled-coil domain-containing protein 175                         | CCDC175    | 583 | S | 1     | 48.95 | 0.42 | 0.44 | NaN  | 0.25 | NaN  | NaN  | 0.35 | 0.33 | NaN  |
| A0A0A6YYC0 | Ribosomal protein S6 kinase; Ribosomal protein S6 kinase alpha-4  | RPS6KA4    | 331 | S | 0.999 | 108.7 | 0.55 | 0.43 | NaN  | NaN  | NaN  | NaN  | NaN  | 0.99 | 0.79 |
| A0A0A6YYC7 | E3 ubiquitin-protein ligase ZFP91                                 | ZFP91-CNTF | 83  | S | 0.823 | 93.45 | 0.76 | NaN  | NaN  | 0.66 | 0.69 | NaN  | NaN  | 0.89 | NaN  |
| A8MV53     | Suppressor of SWI4 1                                              | PPAN       | 306 | S | 1     | 148.9 | 1.21 | 1.30 | 1.34 | 1.29 | 1.28 | 1.31 | 1.08 | 1.05 | 1.06 |
| A0A0A6YYJ8 | Putative RNA-binding protein Luc7-like 2                          | LUC7L2     | 449 | S | 1     | 106.9 | 0.95 | 0.99 | 1.01 | 0.89 | 0.90 | 0.91 | 0.93 | 0.95 | 0.99 |
| A0A0A6YYJ8 | Putative RNA-binding protein Luc7-like 2                          | LUC7L2     | 450 | S | 1     | 106.9 | 0.95 | 0.99 | 1.01 | 0.89 | 0.90 | 0.91 | 0.93 | 0.95 | 0.99 |
| A0A0B4J1S8 | Phosphatidylinositol 4-kinase beta                                | PI4KB      | 440 | S | 1     | 118.5 | 1.77 | 1.91 | NaN  | 1.16 | 1.43 | NaN  | 1.82 | 1.84 | 2.33 |
| H0YEG1     | Mediator of RNA polymerase II transcription subunit 24            | MED24      | 49  | S | 0.83  | 156.1 | 1.46 | 0.95 | 0.91 | 1.29 | NaN  | NaN  | NaN  | 0.81 | 0.68 |
| A0A0C4DFS6 | Protein sprouty homolog 4                                         | SPRY4      | 148 | S | 1     | 82.48 | 2.62 | 2.24 | 2.75 | 2.47 | 2.27 | 2.41 | 1.49 | 1.25 | 1.98 |
| E7EQD7     | Disks large homolog 1                                             | DLG1       | 102 | S | 0.666 | 137   | 1.72 | 1.95 | 2.06 | 1.79 | 1.86 | NaN  | NaN  | NaN  | NaN  |
| H0Y3X6     | Negative elongation factor A                                      | NELFA      | 367 | S | 0.962 | 49.09 | 0.97 | 0.92 | NaN  | NaN  | 1.46 | NaN  | NaN  | 1.27 | 1.28 |
| A0A0C4DG07 | Nibrin                                                            | NBN        | 350 | S | 0.968 | 49.09 | 0.74 | 0.78 | NaN  | NaN  | 1.10 | 1.01 | 0.69 | 0.59 | NaN  |
| H7C3Q7     | Abl interactor 2                                                  | ABI2       | 93  | S | 0.87  | 69.35 | 1.13 | 1.43 | NaN  | 1.59 | NaN  | NaN  | NaN  | NaN  | NaN  |
| H7C3Q7     | Abl interactor 2                                                  | ABI2       | 49  | S | 0.965 | 82.19 | 0.70 | NaN  | 0.68 | 0.84 | 0.83 | 0.81 | 0.69 | 0.67 | 0.63 |
| H7BZV4     | ADP-ribosylation factor-like protein 6-interacting protein 4      | ARL6IP4    | 130 | S | 1     | 276.8 | 1.66 | 1.54 | 1.74 | 1.45 | 1.52 | 1.44 | 1.70 | 1.68 | 1.69 |
| A0A0C4DG89 | Probable ATP-dependent RNA helicase DDX46                         | DDX46      | 804 | S | 1     | 225.1 | 0.59 | 0.61 | 0.61 | 0.63 | 0.69 | 0.72 | 0.48 | 0.48 | 0.53 |
| H7C477     | THO complex subunit 2                                             | THOC2      | 153 | S | 0.967 | 67.17 | 0.73 | 0.63 | NaN  | NaN  | NaN  | NaN  | NaN  | NaN  | NaN  |
| A0A0C4DGA7 | Actin-binding LIM protein 3                                       | ABLIM3     | 470 | S | 1     | 40.32 | NaN  | 1.99 | NaN  | NaN  | 1.37 | NaN  | 2.24 | 2.38 | 2.75 |
| A0A0C4DGA7 | Actin-binding LIM protein 3                                       | ABLIM3     | 471 | S | 1     | 40.32 | NaN  | 1.99 | NaN  | NaN  | 1.37 | NaN  | 2.24 | 2.38 | 2.75 |
| A0A0C4DGB5 | Calpastatin                                                       | CAST       | 289 | S | 0.987 | 309   | 1.15 | 0.90 | 0.96 | 0.76 | 1.76 | 1.32 | 0.81 | 0.46 | 1.03 |
| A0A0C4DGB5 | Calpastatin                                                       | CAST       | 412 | S | 0.62  | 99.11 | 1.11 | 1.27 | NaN  | 1.21 | NaN  | NaN  | NaN  | 1.32 | NaN  |
| A0A0C4DGG1 | Protein kinase C and casein kinase substrate in neurons protein 3 | PACSIN3    | 354 | S | 0.998 | 150.3 | 0.37 | 0.59 | 0.38 | NaN  | NaN  | NaN  | 1.42 | NaN  | 1.58 |
| A0A0C4DGG1 | Protein kinase C and casein kinase substrate in neurons protein 3 | PACSIN3    | 319 | S | 0.995 | 68.82 | 1.07 | 1.21 | NaN  | 0.94 | NaN  | NaN  | 1.10 | 1.40 | NaN  |
| A0A2R8YE38 | Chromodomain-helicase-DNA-binding protein 4                       | CHD4       | 286 | S | 0.997 | 152.4 | 0.45 | 0.50 | 0.53 | 0.63 | 0.62 | 0.63 | 0.44 | 0.44 | 0.44 |
| A0A0C4DGH6 | UHRF1-binding protein 1-like                                      | UHRF1BP1L  | 639 | S | 0.947 | 97.9  | NaN  | NaN  | NaN  | 0.54 | 0.59 | NaN  | 0.77 | NaN  | NaN  |
| H0YHL2     | Bromodomain adjacent to zinc finger domain protein 2A             | BAZ2A      | 66  | S | 0.894 | 47.06 | NaN  | NaN  | NaN  | NaN  | NaN  | 0.94 | NaN  | 0.51 | 0.87 |
| J3QRU8     | ARF GTPase-activating protein GIT1                                | GIT1       | 592 | S | 0.676 | 64.55 | NaN  | NaN  | NaN  | NaN  | NaN  | NaN  | 0.87 | 0.97 | NaN  |
| J3QRU8     | ARF GTPase-activating protein GIT1                                | GIT1       | 362 | S | 0.953 | 101.8 | 0.92 | NaN  | NaN  | NaN  | 1.20 | 1.28 | 0.73 | 0.66 | 0.79 |



|            |                                                          |         |      |   |       |       |      |      |      |      |      |      |      |      |      |
|------------|----------------------------------------------------------|---------|------|---|-------|-------|------|------|------|------|------|------|------|------|------|
| J3QRU8     | ARF GTPase-activating protein GIT1                       | GIT1    | 388  | S | 1     | 317.9 | NaN  | NaN  | NaN  | NaN  | NaN  | NaN  | 0.70 | NaN  | 0.63 |
| H7BXT7     | BET1-like protein                                        | BET1L   | 9    | S | 1     | 130.6 | 2.21 | 2.46 | 2.82 | NaN  | NaN  | NaN  | 2.38 | NaN  | NaN  |
| A0A0C4DH22 | Band 4.1-like protein 1                                  | EPB41L1 | 783  | S | 1     | 108   | 1.90 | 2.12 | NaN  | 1.29 | 1.25 | 1.40 | 1.54 | 1.66 | 1.56 |
| Q5QPR4     | Cyclin-dependent kinase 11A;Cyclin-dependent kinase 11B  | CDK11A  | 234  | S | 0.982 | 190.8 | 0.61 | 0.66 | NaN  | 0.84 | 0.81 | 0.80 | 0.86 | NaN  | NaN  |
| Q5QPR4     | Cyclin-dependent kinase 11A;Cyclin-dependent kinase 11B  | CDK11A  | 540  | S | 1     | 81.26 | 0.87 | NaN  | 0.90 | 0.81 | 0.77 | 0.83 | 0.96 | 1.02 | 1.07 |
| Q5QPR4     | Cyclin-dependent kinase 11A;Cyclin-dependent kinase 11B  | CDK11A  | 13   | S | 1     | 88.77 | 0.97 | 0.97 | NaN  | 0.82 | 1.04 | 0.89 | NaN  | 0.94 | 0.86 |
| H7C3Z6     | Mitogen-activated protein kinase kinase kinase kinase 4  | MAP4K4  | 243  | S | 0.946 | 50.9  | 1.36 | 1.42 | NaN  | NaN  | NaN  | 1.02 | NaN  | NaN  | NaN  |
| E7EXA6     | Chromosome transmission fidelity protein 18 homolog      | CHTF18  | 871  | S | 1     | 108.4 | 0.53 | 0.43 | 0.64 | 0.62 | 0.65 | 0.53 | 0.83 | NaN  | 0.76 |
| A0A0D9SFE4 |                                                          | DNM1    | 847  | S | 0.99  | 63.8  | 0.85 | 0.70 | 0.90 | 0.84 | NaN  | 0.83 | 0.92 | 1.11 | 0.85 |
| A0A0G2JHC2 | Phostensin                                               | PPP1R18 | 125  | S | 1     | 47.56 | 1.01 | NaN  | NaN  | 1.20 | 0.91 | 1.15 | NaN  | NaN  | 0.84 |
| A0A0G2JHC2 | Phostensin                                               | PPP1R18 | 224  | S | 1     | 103.9 | 1.02 | NaN  | 1.26 | 1.51 | NaN  | NaN  | NaN  | NaN  | 1.27 |
| A0A0G2JHN8 | Bromodomain-containing protein 2                         | BRD2    | 160  | S | 0.995 | 123.8 | NaN  | 0.81 | NaN  | 0.97 | 0.74 | 0.90 | NaN  | NaN  | NaN  |
| A0A0G2JMS7 | Protein scribble homolog                                 | SCRIB   | 1405 | S | 1     | 120.3 | 1.80 | 2.40 | NaN  | NaN  | 2.31 | 2.36 | NaN  | 0.97 | 1.46 |
| A0A0G2JMS7 | Protein scribble homolog                                 | SCRIB   | 1485 | S | 0.971 | 101.5 | 1.19 | NaN  | NaN  | 1.34 | 1.05 | NaN  | 1.08 | NaN  | 0.60 |
| A0A0G2JMS7 | Protein scribble homolog                                 | SCRIB   | 1394 | S | 1     | 62.34 | 2.88 | NaN  | NaN  | 1.90 | 1.94 | NaN  | 1.07 | 1.20 | NaN  |
| A0A0G2JMS7 | Protein scribble homolog                                 | SCRIB   | 1225 | S | 0.997 | 88.54 | 0.60 | 0.57 | 0.62 | 0.86 | NaN  | 0.67 | 0.90 | 0.76 | 0.74 |
| A0A0G2JMS7 | Protein scribble homolog                                 | SCRIB   | 1228 | S | 1     | 88.54 | 0.60 | 0.57 | 0.62 | 0.86 | NaN  | 0.67 | 0.90 | 0.76 | 0.74 |
| A0A0G2JMS7 | Protein scribble homolog                                 | SCRIB   | 754  | S | 0.998 | 117.5 | 0.93 | NaN  | NaN  | 0.94 | 0.99 | NaN  | 0.99 | NaN  | 1.12 |
| A0A0G2JMS7 | Protein scribble homolog                                 | SCRIB   | 1367 | S | 1     | 119.5 | NaN  | 1.39 | 1.43 | 1.31 | 1.16 | 1.21 | 1.19 | 1.21 | 1.14 |
| A0A0G2JNJ7 | CCR4-NOT transcription complex subunit 3                 | CNOT3   | 221  | S | 0.757 | 71.73 | 0.85 | NaN  | NaN  | NaN  | 1.31 | 1.48 | 0.76 | 0.79 | NaN  |
| F6RP06     | BCL2/adenovirus E1B 19 kDa protein-interacting protein 3 | BNIP3   | 105  | S | 1     | 59.27 | NaN  | 1.14 | NaN  | 0.85 | NaN  | 0.93 | 0.96 | NaN  | 1.12 |
| A0A0J9YX88 | PHD and RING finger domain-containing protein 1          | PHRF1   | 1360 | S | 1     | 153   | 0.58 | NaN  | 0.90 | 0.77 | 0.73 | 0.74 | 1.02 | 1.39 | 0.91 |
| A0A0J9YX88 | PHD and RING finger domain-containing protein 1          | PHRF1   | 1371 | S | 0.974 | 92.96 | 0.58 | NaN  | 0.79 | 0.64 | NaN  | 0.74 | NaN  | 0.99 | 0.99 |
| A0A0J9YX88 | PHD and RING finger domain-containing protein 1          | PHRF1   | 1202 | S | 1     | 98.3  | 1.65 | 1.68 | 1.68 | NaN  | NaN  | 1.12 | NaN  | NaN  | 1.60 |
| A0A0J9YX88 | PHD and RING finger domain-containing protein 1          | PHRF1   | 915  | S | 0.989 | 169.9 | NaN  | 1.52 | 1.51 | NaN  | NaN  | 0.95 | NaN  | NaN  | 0.91 |
| A0A0J9YX88 | PHD and RING finger domain-containing protein 1          | PHRF1   | 1229 | S | 0.969 | 44.18 | NaN  | NaN  | 0.53 | NaN  | 0.69 | NaN  | 0.95 | 1.04 | NaN  |
| A0A0J9YX88 | PHD and RING finger domain-containing protein 1          | PHRF1   | 973  | S | 1     | 108   | 1.36 | 1.20 | NaN  | 1.86 | 1.30 | 1.18 | 1.31 | 1.15 | 1.19 |
| A0A0J9YWLO | Absent in melanoma 1 protein                             | AIM1    | 941  | S | 0.692 | 96.55 | 0.58 | NaN  | 0.69 | NaN  | NaN  | NaN  | 0.75 | NaN  | 1.01 |

|            |                                                                                                                                                                                                                                                                                                                                                        |          |     |   |       |       |      |      |      |      |      |      |      |      |      |
|------------|--------------------------------------------------------------------------------------------------------------------------------------------------------------------------------------------------------------------------------------------------------------------------------------------------------------------------------------------------------|----------|-----|---|-------|-------|------|------|------|------|------|------|------|------|------|
| E9PH18     | DnaJ homolog subfamily B member 6                                                                                                                                                                                                                                                                                                                      | DNAJB6   | 162 | S | 1     | 179.6 | 1.97 | NaN  | NaN  | 2.11 | 2.04 | NaN  | NaN  | NaN  | NaN  |
| A0A0J9YXZ5 | Ras GTPase-activating-like protein IQGAP1                                                                                                                                                                                                                                                                                                              | IQGAP1   | 330 | S | 1     | 120.9 | 1.95 | 2.08 | 2.09 | 3.11 | 2.99 | 2.91 | 1.10 | 1.02 | 1.18 |
| A0A0J9YYJ3 | Transmembrane protein 184B                                                                                                                                                                                                                                                                                                                             | TMEM184B | 343 | S | 0.997 | 82.75 | 1.27 | 1.29 | 0.67 | 1.22 | 1.24 | 1.10 | 1.14 | 1.16 | 1.14 |
| A0A0J9YYJ3 | Transmembrane protein 184B                                                                                                                                                                                                                                                                                                                             | TMEM184B | 344 | S | 0.999 | 92.05 | 0.56 | 1.29 | NaN  | 1.22 | 1.24 | 0.82 | 1.14 | 1.16 | 1.04 |
| D6REM6     | Matrin-3                                                                                                                                                                                                                                                                                                                                               | MATR3    | 188 | S | 1     | 80.46 | 2.23 | NaN  | NaN  | 1.27 | 1.35 | NaN  | NaN  | NaN  | NaN  |
| D6REM6     | Matrin-3                                                                                                                                                                                                                                                                                                                                               | MATR3    | 596 | S | 0.949 | 55.71 | 0.59 | 0.65 | 0.75 | 0.74 | NaN  | NaN  | NaN  | 1.03 | 1.00 |
| D6REM6     | Matrin-3                                                                                                                                                                                                                                                                                                                                               | MATR3    | 598 | S | 1     | 216.4 | 0.83 | 0.99 | 0.78 | 0.80 | 0.79 | 0.81 | 0.79 | 0.79 | 0.82 |
| D6REM6     | Matrin-3                                                                                                                                                                                                                                                                                                                                               | MATR3    | 604 | S | 0.984 | 127   | 0.46 | 0.45 | 3.55 | 0.55 | 0.51 | 0.52 | 0.82 | 0.86 | 0.91 |
| A0A0U1RQF0 | Fatty acid synthase;[Acyl-carrier-protein] S-acetyltransferase;[Acyl-carrier-protein] S-malonyltransferase;3-oxoacyl-[acyl-carrier-protein] synthase;3-oxoacyl-[acyl-carrier-protein] reductase;3-hydroxyacyl-[acyl-carrier-protein] dehydratase;Enoyl-[acyl-carrier-protein]                                                                          | FASN     | 207 | S | 0.994 | 84.17 | NaN  | NaN  | 0.63 | 0.95 | 0.74 | 0.87 | 0.45 | 0.44 | 0.55 |
| A0A0U1RRM7 | ATR-interacting protein Calcium-transporting                                                                                                                                                                                                                                                                                                           | ATRIP    | 131 | S | 0.997 | 80.05 | NaN  | NaN  | 0.96 | 0.92 | NaN  | 0.99 | 1.16 | 0.94 | 0.83 |
| A0A0U1RQU3 | ATPase;Plasma membrane calcium-transporting ATPase                                                                                                                                                                                                                                                                                                     | ATP2B1   | 258 | S | 0.986 | 84.19 | 0.43 | 0.35 | 0.37 | 0.47 | 0.52 | 0.51 | 0.49 | 0.44 | 0.58 |
| A0A0U1RRD7 | InaD-like protein                                                                                                                                                                                                                                                                                                                                      | INADL    | 28  | S | 0.986 | 102.2 | NaN  | NaN  | NaN  | 0.62 | 0.78 | NaN  | NaN  | 0.46 | NaN  |
| A0A1B0GW38 | E3 ubiquitin-protein ligase HLA class I histocompatibility antigen, A-80 alpha chain;HLA class I histocompatibility antigen, A-23 alpha chain;HLA class I histocompatibility antigen, A-69 alpha chain;HLA class I histocompatibility antigen, A-24 alpha chain;HLA class I histocompatibility antigen, A-2 alpha chain;HLA class I histocompatibility | CBL      | 481 | S | 1     | 89.77 | 1.11 | 1.05 | 1.19 | 1.18 | 1.34 | 1.10 | 0.88 | 0.75 | NaN  |
| A0A140T9I0 | Putative pre-mRNA-splicing factor ATP-dependent RNA helicase DHX16                                                                                                                                                                                                                                                                                     | HLA-A    | 356 | S | 0.997 | 134.1 | 3.07 | 3.16 | NaN  | 3.39 | 1.93 | NaN  | NaN  | NaN  | NaN  |
| A2AB15     | Putative pre-mRNA-splicing factor ATP-dependent RNA helicase DHX16                                                                                                                                                                                                                                                                                     | DHX16    | 43  | S | 1     | 219.5 | 0.42 | 0.49 | 1.19 | 1.16 | 0.82 | 0.80 | 1.41 | 0.62 | 1.35 |

|            |                                                                    |            |         |   |   |       |       |      |      |      |      |      |      |      |      |      |
|------------|--------------------------------------------------------------------|------------|---------|---|---|-------|-------|------|------|------|------|------|------|------|------|------|
| A2AB15     | Putative pre-mRNA-splicing factor ATP-dependent RNA helicase DHX16 | DHX16      | 46      | S | 1 | 219.5 | 1.23  | 1.15 | 1.19 | 1.16 | 1.19 | 1.14 | 1.41 | 1.37 | 1.35 |      |
| A2AB15     | Putative pre-mRNA-splicing factor ATP-dependent RNA helicase DHX16 | DHX16      | 100     | S | 1 | 207.6 | 0.71  | 0.80 | 0.80 | 0.91 | 0.75 | 0.65 | 0.83 | 0.89 | NaN  |      |
| A0A1B0GTJ6 |                                                                    |            | 248     | S |   | 0.955 | 71.15 | 1.10 | 1.08 | 1.23 | 1.08 | NaN  | 1.01 | 1.19 | NaN  | 1.36 |
| A0A1B0GTL5 |                                                                    |            | 634     | S |   | 0.998 | 66.92 | 1.34 | 1.29 | NaN  | NaN  | NaN  | NaN  | NaN  | 1.50 | 1.59 |
| A0A1B0GTL5 |                                                                    |            | 640     | S |   | 0.997 | 77.81 | 1.05 | 1.16 | 1.25 | 1.05 | 1.13 | 1.11 | 1.27 | 1.27 | 1.25 |
| A0A1B0GTL5 |                                                                    |            | 866     | S |   | 0.999 | 150.7 | 0.76 | 0.72 | 1.20 | 0.94 | 1.04 | 0.93 | 1.20 | 1.28 | 1.30 |
| A0A1B0GTL5 |                                                                    |            | 871     | S |   | 0.951 | 69.58 | NaN  | NaN  | NaN  | 0.34 | NaN  | 1.52 | NaN  | NaN  | NaN  |
| A0A1B0GTL5 |                                                                    |            | 938     | S |   | 0.988 | 102.7 | NaN  | NaN  | NaN  | 1.05 | 0.96 | 0.91 | 1.01 | 1.08 | NaN  |
| A0A1B0GTL5 |                                                                    |            | 911     | S |   | 0.802 | 91.65 | NaN  | NaN  | NaN  | 1.27 | NaN  | 1.26 | NaN  | NaN  | NaN  |
| A0A1B0GTL5 |                                                                    |            | 913     | S |   | 0.987 | 166.4 | 1.47 | 1.97 | 1.76 | NaN  | 1.26 | 1.22 | NaN  | 1.93 | 1.55 |
| A0A1B0GTL5 | Rab11 family-interacting protein 5                                 | RAB11FI P5 | 482;482 | S |   | 0.977 | 64.91 | 3.33 | NaN  | 2.33 | 1.77 | NaN  | NaN  | 2.84 | NaN  | NaN  |
| A0A1B0GTL5 | Rab11 family-interacting protein 5                                 | RAB11FI P5 | 307;307 | S | 1 |       | 120   | 1.08 | 1.15 | 1.16 | 1.12 | 1.19 | 1.11 | 0.78 | 0.82 | NaN  |
| F5GZ78     | Paxillin                                                           | PXN        | 300     | S |   | 0.639 | 136.4 | 1.37 | 1.47 | NaN  | 1.19 | 1.23 | NaN  | 1.09 | 0.85 | NaN  |
| F5GZ78     | Paxillin                                                           | PXN        | 301     | S |   | 0.978 | 115.7 | 1.62 | 1.38 | 1.32 | 1.19 | 1.08 | 1.40 | NaN  | 1.01 | 1.25 |
| F5GZ78     | Paxillin                                                           | PXN        | 83      | S |   | 0.911 | 250.3 | 1.70 | 1.81 | 1.80 | 1.74 | 2.15 | 1.73 | 1.20 | 1.11 | 1.28 |
| F5GZ78     | Paxillin                                                           | PXN        | 256     | S |   | 0.971 | 42.21 | NaN  | 2.20 | 2.53 | 2.54 | 2.15 | 2.52 | 2.77 | 2.01 | NaN  |
| F5GZ78     | Paxillin                                                           | PXN        | 320     | S |   | 0.999 | 396.1 | 0.81 | 0.80 | 0.77 | 0.90 | NaN  | 1.00 | 0.83 | 0.79 | 0.83 |
| F5GZ78     | Paxillin                                                           | PXN        | 104     | S |   | 1     | 378.2 | 4.54 | 5.48 | 4.12 | 3.79 | 3.86 | 3.12 | 1.57 | 1.41 | 1.63 |
| F5GZ78     | Paxillin                                                           | PXN        | 117     | S |   | 0.676 | 60.36 | NaN  | NaN  | 2.14 | NaN  | NaN  | NaN  | NaN  | 1.03 | 2.47 |
| A0A3B3ITE1 | Tight junction protein ZO-2                                        | TJP2       | 979     | S |   | 0.994 | 91.47 | 1.24 | 1.12 | 1.13 | 0.96 | 1.04 | 1.17 | 1.68 | 1.57 | 1.67 |
| A0A3B3ITE1 | Tight junction protein ZO-2                                        | TJP2       | 267     | S | 1 |       | 115.7 | 1.19 | 1.21 | 1.21 | 1.16 | 1.14 | 1.08 | 1.29 | 1.26 | 1.34 |
| A0A3B3ITE1 | Tight junction protein ZO-2                                        | TJP2       | 987     | S | 1 |       | 128.9 | 0.85 | 0.84 | 0.79 | 0.83 | 0.85 | 0.82 | 0.91 | 0.93 | 0.94 |
| A0A3B3ITE1 | Tight junction protein ZO-2                                        | TJP2       | 395     | S |   | 0.963 | 79.9  | 2.12 | 0.94 | NaN  | NaN  | NaN  | NaN  | NaN  | NaN  | NaN  |
| A0A3B3ITE1 | Tight junction protein ZO-2                                        | TJP2       | 399     | S |   | 0.973 | 172.3 | 2.12 | 0.94 | NaN  | NaN  | NaN  | NaN  | 1.26 | NaN  | NaN  |
| A0A3B3ITE1 | Tight junction protein ZO-2                                        | TJP2       | 401     | S |   | 0.718 | 94.5  | 2.12 | 0.94 | NaN  | NaN  | NaN  | NaN  | NaN  | NaN  | NaN  |
| A0A3B3ITE1 | Tight junction protein ZO-2                                        | TJP2       | 416     | S | 1 |       | 112.4 | 1.16 | 0.60 | 0.63 | 0.59 | 0.60 | 0.60 | 0.76 | 0.75 | 0.77 |
| A0A3B3ITE1 | Tight junction protein ZO-2                                        | TJP2       | 1160    | S | 1 |       | 255.9 | 1.69 | 1.78 | 1.53 | 1.42 | NaN  | 1.33 | 1.78 | 1.93 | 1.93 |
| A0A3B3ITE1 | Tight junction protein ZO-2                                        | TJP2       | 967     | S | 1 |       | 87    | 1.13 | 1.34 | NaN  | NaN  | 1.05 | NaN  | NaN  | 1.18 | NaN  |
| A0A3B3ITE1 | Tight junction protein ZO-2                                        | TJP2       | 131     | S | 1 |       | 145.8 | 0.92 | 1.08 | 1.02 | 1.08 | 1.26 | 1.13 | 0.93 | 0.84 | 0.89 |
| A0A3B3ITE1 | Tight junction protein ZO-2                                        | TJP2       | 1068    | S |   | 0.832 | 90.3  | 1.58 | 1.32 | 1.39 | 1.68 | NaN  | 1.36 | 1.66 | 1.18 | 1.56 |
| A0A3B3ITE1 | Tight junction protein ZO-2                                        | TJP2       | 1069    | S |   | 0.545 | 75.05 | 0.82 | NaN  | NaN  | 1.44 | 1.41 | 1.36 | NaN  | 1.18 | NaN  |
| A0A3B3ITE1 | Tight junction protein ZO-2                                        | TJP2       | 171     | S | 1 |       | 102.9 | 0.46 | 0.47 | 1.38 | 1.27 | 1.25 | 1.25 | 1.66 | 1.61 | 1.62 |
| A0A3B3ITE1 | Tight junction protein ZO-2                                        | TJP2       | 175     | S | 1 |       | 104.8 | 1.17 | 1.23 | 1.02 | 0.92 | 1.07 | 1.01 | 1.06 | 1.08 | 1.02 |
| A0A1B0GUM1 | Pleckstrin homology domain-containing family A member 7            | PLEKHA7    | 88      | S |   | 0.983 | 92.73 | 0.51 | 1.04 | 0.69 | NaN  | NaN  | NaN  | NaN  | NaN  | NaN  |
| Q5VT15     | Pleckstrin homology domain-containing family A member 6            | PLEKHA6    | 797     | S |   | 0.947 | 155.2 | 0.70 | NaN  | NaN  | 0.88 | NaN  | NaN  | 0.72 | 0.79 | NaN  |
| A0A1B0GV68 | FERM, RhoGEF and pleckstrin domain-containing                      | FARP1      | 427     | S |   | 0.978 | 47.08 | NaN  | NaN  | 3.04 | NaN  | NaN  | NaN  | 3.90 | 3.44 | NaN  |
| E7EUR8     | Protein FAM193A                                                    | FAM193A    | 147     | S |   | 0.919 | 82.48 | NaN  | 0.95 | NaN  | 1.31 | 1.20 | NaN  | 0.86 | NaN  | NaN  |

|            |                                                                                                                                           |         |      |   |       |       |      |      |      |      |      |      |      |      |      |
|------------|-------------------------------------------------------------------------------------------------------------------------------------------|---------|------|---|-------|-------|------|------|------|------|------|------|------|------|------|
| A0A1B0GVY1 | E3 ubiquitin-protein ligase<br>NEDD4-like                                                                                                 | NEDD4L  | 582  | S | 0.976 | 79.61 | 0.75 | 0.70 | NaN  | 0.66 | 0.67 | NaN  | NaN  | NaN  | NaN  |
| R4GMM6     | Ubiquitin-conjugating enzyme<br>E2 E3                                                                                                     | UBE2E3  | 8    | S | 1     | 169.1 | 0.87 | 0.86 | NaN  | NaN  | NaN  | NaN  | NaN  | NaN  | NaN  |
| A0A1C7CYX9 |                                                                                                                                           |         | 27   | S | 0.997 | 92.79 | 1.72 | 1.98 | 1.71 | 1.33 | NaN  | 1.34 | 1.69 | 1.80 | 1.87 |
| A0A1W2PNZ9 | Probable JmjC domain-<br>containing histone<br>demethylation protein 2C                                                                   | JMJD1C  | 1825 | S | 0.815 | 75.33 | NaN  | 0.45 | NaN  | 0.70 | 0.50 | NaN  | NaN  | NaN  | NaN  |
| A0A1W2PP04 | RNA-binding motif protein, X-<br>linked 2                                                                                                 | RBMX2   | 187  | S | 0.674 | 209.2 | NaN  | NaN  | NaN  | NaN  | 0.82 | NaN  | 0.95 | 0.97 | NaN  |
| A0A1W2PRI6 | Heterogeneous nuclear<br>ribonucleoprotein U                                                                                              | HNRNPU  | 53   | S | 1     | 184.4 | 0.63 | 0.60 | 0.74 | 0.51 | 0.64 | 0.81 | NaN  | NaN  | NaN  |
| E5RIS7     | Transcription elongation factor<br>A protein 1                                                                                            | TCEA1   | 97   | S | 0.829 | 91.93 | NaN  | 0.94 | NaN  | 0.83 | NaN  | 0.79 | NaN  | NaN  | 1.00 |
| E5RIS7     | Transcription elongation factor<br>A protein 1                                                                                            | TCEA1   | 100  | S | 1     | 183.1 | 0.76 | 0.79 | 0.83 | 0.85 | 0.89 | 0.85 | 0.87 | 1.02 | 0.91 |
| B4DP61     | Survival motor neuron protein                                                                                                             | SMN2    | 28   | S | 1     | 291.7 | 1.03 | 0.98 | 0.92 | 1.10 | 1.05 | 1.03 | 0.92 | 0.86 | 0.95 |
| B4DP61     | Survival motor neuron protein                                                                                                             | SMN2    | 31   | S | 1     | 133.7 | 3.19 | 2.68 | 3.72 | 2.50 | 2.87 | 2.39 | 2.28 | 0.96 | 1.90 |
| A0A286YEX4 | Nuclear factor 1 C-type                                                                                                                   | NFIC    | 345  | S | 0.944 | 219.3 | NaN  | 0.55 | 0.80 | 0.92 | 0.84 | 0.92 | 0.64 | NaN  | NaN  |
| A0A286YEX4 | Nuclear factor 1 C-type                                                                                                                   | NFIC    | 361  | S | 0.96  | 86.51 | 0.50 | 0.57 | 0.55 | 0.82 | 0.67 | 0.79 | NaN  | 0.57 | 0.55 |
| H0Y9X0     | Protein furry homolog-like                                                                                                                | FRYL    | 1142 | S | 0.86  | 89.23 | NaN  | NaN  | NaN  | 1.51 | NaN  | 1.33 | NaN  | NaN  | NaN  |
| A0A286YFD6 | Ribonucleoside-diphosphate<br>reductase subunit M2                                                                                        | RRM2    | 20   | S | 1     | 122.2 | 1.13 | 1.09 | 1.01 | 0.98 | 1.13 | 1.18 | 1.03 | 1.07 | 1.00 |
| A0A286YFG8 |                                                                                                                                           |         | 128  | S | 1     | 41.09 | NaN  | NaN  | NaN  | 0.91 | NaN  | 0.92 | 1.36 | 1.37 | NaN  |
| A0A2R8Y5E8 | Probable histidine--tRNA<br>ligase, mitochondrial                                                                                         | HARS2   | 56   | S | 1     | 42.29 | 0.59 | 0.95 | NaN  | NaN  | NaN  | NaN  | NaN  | NaN  | NaN  |
| A0A2R8Y5T7 | Glutathione synthetase                                                                                                                    | GSS     | 301  | S | 1     | 52.06 | NaN  | 0.64 | NaN  | 1.27 | 1.07 | NaN  | 1.27 | 1.11 | NaN  |
| A0A2R8Y443 | Dual specificity tyrosine-<br>phosphorylation-regulated<br>kinase 1B;Dual specificity<br>tyrosine-phosphorylation-<br>regulated kinase 1A | DYRK1B  | 286  | S | 0.788 | 45.72 | 0.71 | NaN  | 0.91 | NaN  | 0.84 | NaN  | 0.90 | 0.93 | 0.91 |
| A0A2R8Y679 | Serine/threonine-protein<br>kinase B-raf                                                                                                  | BRAF    | 128  | S | 0.6   | 50.95 | 1.09 | 0.77 | NaN  | NaN  | NaN  | NaN  | NaN  | NaN  | NaN  |
| F5H777     | Coiled-coil domain-containing<br>protein 82                                                                                               | CCDC82  | 154  | S | 1     | 157.3 | 0.88 | 0.60 | NaN  | NaN  | NaN  | NaN  | NaN  | NaN  | NaN  |
| A0A2R8Y4N5 | DnaJ homolog subfamily C<br>member 21                                                                                                     | DNAJC21 | 254  | S | 1     | 339.3 | 0.58 | 0.53 | 0.70 | 0.95 | 0.87 | 0.91 | 0.73 | 0.67 | 0.71 |
| A0A2R8YF61 | Cyclin-dependent kinase 13                                                                                                                | CDK13   | 102  | S | 0.843 | 103.4 | NaN  | 0.50 | 1.89 | NaN  | NaN  | NaN  | NaN  | NaN  | NaN  |
| A0A2R8Y4Z8 | Coiled-coil domain-containing<br>protein 9                                                                                                | CCDC9   | 386  | S | 0.882 | 165.7 | 1.05 | 1.17 | 1.01 | 0.86 | 0.85 | 0.86 | 0.91 | 1.00 | 1.18 |
| A0A2R8Y4Z8 |                                                                                                                                           |         | 521  | S | 1     | 123.7 | 1.89 | NaN  | 2.12 | 1.74 | 1.90 | 1.77 | 1.12 | 1.24 | 1.22 |
| A0A2R8Y6I5 | Cytoplasmic dynein 1 heavy<br>chain 1                                                                                                     | DYNC1H1 | 209  | S | 0.667 | 50.66 | 0.76 | NaN  | NaN  | 1.17 | 0.96 | NaN  | 1.15 | NaN  | NaN  |
| A0A2R8Y7R5 | Deoxynucleoside triphosphate<br>triphosphohydrolase SAMHD1                                                                                | SAMHD1  | 33   | S | 1     | 211.2 | 0.53 | 0.53 | 0.46 | 0.48 | 0.50 | 0.47 | 0.57 | NaN  | 0.65 |
| H0YH87     | Ataxin-2                                                                                                                                  | ATXN2   | 701  | S | 0.934 | 166.1 | 1.13 | NaN  | 1.09 | 1.33 | 1.35 | NaN  | 1.25 | NaN  | 1.45 |

|            |                                                                          |         |     |   |       |       |      |      |      |      |      |      |      |      |      |
|------------|--------------------------------------------------------------------------|---------|-----|---|-------|-------|------|------|------|------|------|------|------|------|------|
| H0YH87     | Ataxin-2                                                                 | ATXN2   | 705 | S | 0.979 | 166.1 | 1.13 | NaN  | 1.09 | 1.33 | 1.35 | 1.37 | 1.25 | NaN  | 1.45 |
| H0YH87     | Ataxin-2                                                                 | ATXN2   | 612 | S | 0.953 | 89.51 | 1.14 | 0.50 | 0.53 | NaN  | NaN  | 0.76 | NaN  | 0.88 | 0.95 |
| H0YH87     | Ataxin-2                                                                 | ATXN2   | 598 | S | 0.86  | 63.1  | NaN  | NaN  | 0.65 | 1.11 | 1.06 | 0.75 | 0.62 | 0.67 | 0.94 |
| H3BQK4     | Tuberin                                                                  | TSC2    | 157 | S | 1     | 138.1 | 0.33 | NaN  | NaN  | 0.48 | 0.62 | NaN  | 0.44 | 1.09 | 1.42 |
| A0A494C1R1 | Putative Polycomb group protein ASXL1                                    | ASXH1   | 503 | S | 0.535 | 74.91 | NaN  | NaN  | NaN  | NaN  | NaN  | NaN  | 0.91 | 0.78 | NaN  |
| A0A2R8Y611 | AP-3 complex subunit delta-1                                             | AP3D1   | 374 | S | 1     | 107.7 | 0.44 | 0.43 | NaN  | NaN  | NaN  | NaN  | NaN  | NaN  | NaN  |
| A0A2R8Y611 | AP-3 complex subunit delta-1                                             | AP3D1   | 376 | S | 1     | 107.7 | 0.59 | 0.43 | NaN  | NaN  | NaN  | NaN  | NaN  | NaN  | NaN  |
| A0A2R8Y611 | AP-3 complex subunit delta-1                                             | AP3D1   | 378 | S | 1     | 103.8 | 0.33 | 0.43 | NaN  | NaN  | NaN  | NaN  | NaN  | NaN  | NaN  |
| A0A2R8Y611 | AP-3 complex subunit delta-1                                             | AP3D1   | 569 | S | 0.806 | 135.7 | 0.71 | NaN  | NaN  | 1.16 | 1.08 | NaN  | NaN  | 0.64 | NaN  |
| A0A2R8Y611 | AP-3 complex subunit delta-1                                             | AP3D1   | 571 | S | 0.79  | 89.63 | NaN  | NaN  | 0.73 | NaN  | NaN  | NaN  | 0.65 | NaN  | 0.55 |
| H0Y8T6     | Rap guanine nucleotide exchange factor 2                                 | RAPGEF2 | 128 | S | 0.958 | 119.5 | 0.85 | NaN  | 0.86 | 0.67 | 0.60 | 0.84 | 1.12 | 1.14 | NaN  |
| Q5JS72     |                                                                          | CASK    | 192 | S | 0.991 | 284.3 | 1.13 | 1.09 | 1.33 | 1.01 | 0.88 | 1.03 | 1.14 | 1.21 | 1.39 |
| A0A2R8Y6G6 | Alpha-enolase                                                            | ENO1    | 419 | S | 1     | 48.66 | NaN  | NaN  | NaN  | NaN  | NaN  | NaN  | 0.49 | NaN  | 0.72 |
| H0Y470     | Girdin                                                                   | CCDC88A | 65  | S | 0.834 | 88.04 | NaN  | NaN  | NaN  | 2.75 | 1.79 | NaN  | NaN  | NaN  | 2.37 |
| H0Y470     | Girdin                                                                   | CCDC88A | 670 | S | 0.994 | 66.32 | NaN  | NaN  | 1.02 | 0.85 | 0.86 | 0.77 | 1.14 | 1.16 | NaN  |
| H0Y470     | Girdin                                                                   | CCDC88A | 719 | S | 1     | 213.8 | 0.64 | NaN  | 0.65 | NaN  | NaN  | 0.83 | 0.95 | 1.10 | 1.09 |
| F8WF45     | TATA element modulatory factor                                           | TMF1    | 399 | S | 0.556 | 139.8 | 1.37 | 1.39 | 1.72 | 1.19 | 1.08 | 1.29 | 0.99 | 1.29 | NaN  |
| F8WF45     | TATA element modulatory factor                                           | TMF1    | 344 | S | 1     | 231.4 | 1.16 | 0.97 | 1.01 | 1.03 | 0.93 | 1.02 | 0.83 | 0.86 | 0.91 |
| A0A2R8Y7R9 | Liprin-alpha-1;Liprin-alpha-4                                            | PPFIA1  | 733 | S | 0.925 | 62.09 | 1.66 | 0.47 | 1.40 | 1.22 | 1.21 | 0.51 | 1.47 | NaN  | NaN  |
| A0A2R8Y7R9 | Liprin-alpha-1;Liprin-alpha-4                                            | PPFIA1  | 736 | S | 0.575 | 54.02 | 1.66 | 1.35 | 1.40 | 1.22 | 1.21 | NaN  | 1.47 | NaN  | NaN  |
| A0A2R8Y7R9 | Liprin-alpha-1                                                           | PPFIA1  | 224 | S | 0.995 | 73.14 | 2.05 | 1.55 | NaN  | NaN  | NaN  | NaN  | NaN  | NaN  | NaN  |
| A0A2R8Y880 | E3 ubiquitin-protein ligase RBBP6                                        | RBBP6   | 282 | S | 1     | 57.3  | 0.84 | 0.70 | NaN  | NaN  | NaN  | NaN  | NaN  | NaN  | NaN  |
| A0A2R8Y880 | E3 ubiquitin-protein ligase RBBP6                                        | RBBP6   | 283 | S | 1     | 57.3  | 0.84 | 0.70 | NaN  | NaN  | NaN  | NaN  | NaN  | NaN  | NaN  |
| A0A2R8Y880 | E3 ubiquitin-protein ligase RBBP6                                        | RBBP6   | 284 | S | 1     | 57.3  | 0.84 | 0.70 | NaN  | NaN  | NaN  | NaN  | NaN  | NaN  | NaN  |
| A0A2R8Y880 | E3 ubiquitin-protein ligase RBBP6                                        | RBBP6   | 285 | S | 1     | 57.3  | 0.84 | 0.70 | NaN  | NaN  | NaN  | NaN  | NaN  | NaN  | NaN  |
| A0A2R8YCL1 | Growth factor receptor-bound protein 10                                  | GRB10   | 188 | S | 0.974 | 54.63 | NaN  | 1.38 | NaN  | NaN  | 0.93 | NaN  | 1.99 | NaN  | 1.60 |
| C9JEF4     | Histone deacetylase 6                                                    | HDAC6   | 22  | S | 1     | 127.7 | 0.45 | 0.35 | NaN  | NaN  | NaN  | 0.65 | 1.14 | 1.12 | 1.00 |
| A0A2R8YDS4 | Nitric oxide synthase, Rho guanine nucleotide exchange factor 7          | NOS2    | 887 | S | 0.958 | 42.52 | NaN  | NaN  | 0.59 | 1.19 | 1.15 | NaN  | NaN  | 0.49 | NaN  |
| E9PDQ5     | Rho guanine nucleotide exchange factor 7                                 | ARHGEF7 | 420 | S | 0.907 | 63.09 | NaN  | 1.05 | 1.10 | 1.10 | 0.97 | 1.08 | NaN  | 1.27 | NaN  |
| E9PDQ5     | Rho guanine nucleotide exchange factor 7;Rho guanine nucleotide exchange | ARHGEF7 | 262 | S | 1     | 92.44 | 1.76 | 1.53 | 1.79 | 2.27 | 2.05 | 1.97 | NaN  | 0.60 | 0.67 |
| A0A2U3TZL8 | Kinesin-like protein;Kinesin-like protein KIF23                          | KIF23   | 717 | S | 1     | 123.3 | 0.23 | 0.20 | NaN  | 0.36 | NaN  | 0.34 | 0.38 | 0.40 | 0.50 |
| C9J7T7     | Nuclear receptor corepressor                                             | NCOR2   | 496 | S | 1     | 56.6  | NaN  | NaN  | 2.30 | NaN  | NaN  | NaN  | 1.86 | 2.60 | 2.31 |
| Q5JU47     | TBC1 domain family member                                                | TBC1D4  | 103 | S | 0.998 | 62.34 | 0.73 | NaN  | 1.23 | NaN  | 0.89 | NaN  | 2.33 | 2.47 | NaN  |
| Q5JU47     | TBC1 domain family member                                                | TBC1D4  | 200 | S | 0.838 | 177.1 | NaN  | 2.15 | NaN  | NaN  | NaN  | NaN  | 1.92 | NaN  | 2.26 |

|            |                                                                       |          |      |   |       |       |      |      |      |      |      |      |      |      |      |
|------------|-----------------------------------------------------------------------|----------|------|---|-------|-------|------|------|------|------|------|------|------|------|------|
| Q5JU47     | TBC1 domain family member                                             | TBC1D4   | 203  | S | 1     | 249.3 | 1.57 | 0.69 | 0.72 | 2.17 | 0.89 | NaN  | 0.97 | 0.70 | 2.26 |
| C9JBX5     | Translocon-associated protein subunit alpha                           | SSR1     | 200  | S | 1     | 163.9 | 1.91 | 1.66 | NaN  | 1.91 | NaN  | 1.93 | NaN  | 0.98 | 0.61 |
| A0A3B3IS71 | Retinoblastoma-associated protein                                     | RB1      | 807  | S | 1     | 86.54 | 1.41 | NaN  | 0.83 | 0.77 | 0.91 | 0.81 | 0.54 | 0.54 | 0.54 |
| A0A3B3IS71 | Retinoblastoma-associated protein                                     | RB1      | 37   | S | 1     | 123.6 | 0.78 | 0.77 | 0.84 | 0.90 | 1.01 | 0.89 | 0.77 | 0.67 | 0.70 |
| A0A3B3IS71 | Retinoblastoma-associated protein                                     | RB1      | 249  | S | 1     | 71.51 | 1.10 | 1.51 | NaN  | NaN  | NaN  | NaN  | NaN  | NaN  | NaN  |
| A0A3B3IU78 | Coatomer subunit alpha;Xenin;Proxenin                                 | COPA     | 43   | S | 1     | 66.57 | 1.75 | 1.88 | 1.51 | NaN  | NaN  | NaN  | 0.67 | NaN  | NaN  |
| A0A3B3ISN0 | Epidermal growth factor receptor kinase substrate 8-like protein 2    | EPS8L2   | 190  | S | 0.99  | 81.77 | 2.13 | 2.28 | 2.43 | NaN  | 1.10 | 1.03 | 3.04 | 3.11 | 3.13 |
| A0A3B3ISQ4 | Epidermal growth factor receptor kinase substrate 8-like protein 2    | EPS8L2   | 479  | S | 0.785 | 114.7 | 1.01 | NaN  | NaN  | NaN  | NaN  | NaN  | 1.00 | 1.06 | 1.04 |
| A0A3B3ISQ4 | Epidermal growth factor receptor kinase substrate 8-like protein 2    | EPS8L2   | 459  | S | 0.794 | 114.7 | NaN  | NaN  | NaN  | NaN  | NaN  | NaN  | NaN  | 0.74 | 1.04 |
| A0A3B3ISQ4 | Epidermal growth factor receptor kinase substrate 8-like protein 2    | EPS8L2   | 570  | S | 0.993 | 121.9 | 0.91 | 0.89 | 0.95 | 1.06 | 0.95 | 1.00 | 1.10 | 1.05 | 1.16 |
| A0A3B3ISZ4 | Polycomb group RING finger protein 6                                  | PCGF6    | 115  | S | 1     | 103.7 | NaN  | NaN  | NaN  | 0.75 | NaN  | NaN  | 0.89 | 0.79 | 0.77 |
| A0A3B3ITD8 | Nuclear pore complex protein Nup98-Nup96;Nuclear pore complex protein | NUP98    | 606  | S | 1     | 312.6 | 1.80 | 1.60 | 2.08 | 1.55 | 1.52 | 1.43 | 1.80 | 1.89 | 1.49 |
| A0A3B3ITD8 | Nup98:Nuclear pore complex protein                                    | NUP98    | 871  | S | 1     | 235.5 | 0.88 | 0.81 | 0.86 | 0.91 | 0.86 | 0.76 | 1.01 | 0.99 | 1.05 |
| A0A3B3ITE3 | Nup98:Nuclear pore complex Gamma-tubulin complex component 3          | TUBGCP3  | 515  | S | 0.851 | 211.6 | 0.59 | 1.62 | NaN  | NaN  | 0.61 | NaN  | NaN  | 0.68 | NaN  |
| H0Y3A3     | Disabled homolog 2-interacting protein                                | DAB2IP   | 887  | S | 1     | 118.8 | NaN  | NaN  | NaN  | 0.21 | 0.34 | NaN  | 0.38 | 0.48 | 0.66 |
| A0A3B3ITG6 | Translation initiation factor eIF-2B subunit epsilon                  | EIF2B5   | 500  | S | 1     | 128.2 | 0.53 | 0.56 | NaN  | 0.80 | 0.79 | NaN  | NaN  | 0.65 | 0.65 |
| A0A3B3ITK7 | Phosphoglucomutase-1                                                  | PGM1     | 117  | S | 1     | 156.1 | 1.09 | 1.07 | NaN  | NaN  | NaN  | NaN  | NaN  | 1.23 | NaN  |
| A0A3B3IU46 | RNMT-activating mini protein                                          | FAM103A1 | 36   | S | 1     | 90.02 | 1.23 | 1.16 | NaN  | 1.42 | 1.35 | NaN  | 0.82 | 0.89 | NaN  |
| A0A3B3IUA7 | E3 ubiquitin/ISG15 ligase TRIM25                                      | TRIM25   | 100  | S | 1     | 171.5 | 1.11 | 1.09 | 1.27 | 1.75 | 1.72 | 1.32 | 0.96 | 0.88 | 0.43 |
| A0A3F2YNX0 | Protein transport protein Sec16A                                      | SEC16A   | 1905 | S | 0.967 | 55.34 | NaN  | 1.84 | 1.85 | 1.76 | 1.53 | NaN  | 1.27 | 1.33 | NaN  |
| A0A3F2YNX0 | Protein transport protein Sec16A                                      | SEC16A   | 891  | S | 1     | 86.08 | 0.72 | 0.72 | 0.72 | 0.83 | 0.83 | 0.88 | 0.92 | 0.94 | 0.87 |

|            |                                                          |         |      |   |       |       |      |      |      |      |      |      |      |      |      |
|------------|----------------------------------------------------------|---------|------|---|-------|-------|------|------|------|------|------|------|------|------|------|
| A0A3F2YNX0 | Protein transport protein<br>Sec16A                      | SEC16A  | 417  | S | 1     | 130.9 | 0.73 | 0.54 | 0.66 | 0.63 | 1.04 | NaN  | 1.10 | NaN  | NaN  |
| A0A3F2YNX0 | Protein transport protein<br>Sec16A                      | SEC16A  | 1786 | S | 1     | 88.32 | NaN  | 3.42 | 3.56 | 2.48 | 3.00 | 2.77 | 1.89 | NaN  | 2.68 |
| A0A3F2YNX0 | Protein transport protein<br>Sec16A                      | SEC16A  | 390  | S | 0.635 | 118.8 | NaN  | 1.09 | NaN  | NaN  | NaN  | NaN  | 1.03 | 1.14 | NaN  |
| A0A3F2YNX0 | Protein transport protein<br>Sec16A                      | SEC16A  | 391  | S | 0.971 | 225.1 | NaN  | NaN  | 0.78 | 0.98 | 1.10 | 0.92 | NaN  | 0.87 | NaN  |
| A0A3F2YNY6 | Pre-mRNA-processing factor<br>40 homolog A               | PRPF40A | 975  | S | 0.999 | 169.4 | NaN  | NaN  | NaN  | 0.48 | NaN  | 0.51 | 1.41 | NaN  | 0.36 |
| A0A3F2YNY6 | Pre-mRNA-processing factor<br>40 homolog A               | PRPF40A | 920  | S | 1     | 93.92 | 0.94 | 0.89 | 0.88 | 0.93 | 0.89 | 0.87 | 0.91 | 0.88 | 0.93 |
| A0A3F2YNY6 | Pre-mRNA-processing factor<br>40 homolog A               | PRPF40A | 922  | S | 1     | 93.92 | 0.94 | 0.89 | 0.88 | 0.93 | 0.89 | 0.87 | 0.91 | 0.88 | 0.93 |
| A0A3F2YNY6 | Pre-mRNA-processing factor<br>40 homolog A               | PRPF40A | 925  | S | 1     | 93.92 | 0.94 | 1.78 | 2.13 | 0.93 | 0.89 | 0.87 | 0.91 | 0.88 | 0.93 |
| A0A494BZT8 | Transforming acidic coiled-<br>coil-containing protein 3 | TACC3   | 250  | S | 0.745 | 81.14 | 2.07 | NaN  | NaN  | 3.66 | 3.19 | 3.22 | NaN  | NaN  | NaN  |
| A0A494BZT8 | Transforming acidic coiled-<br>coil-containing protein 3 | TACC3   | 434  | S | 0.991 | 149.9 | 3.12 | 2.83 | NaN  | NaN  | 3.24 | NaN  | NaN  | NaN  | NaN  |
| A0A494BZV2 | Myosin phosphatase Rho-<br>interacting protein           | MPRIP   | 2364 | S | 1     | 194.1 | 0.77 | 0.77 | 0.98 | 1.28 | 1.59 | 1.19 | 0.44 | 0.53 | 0.71 |
| A0A494BZV2 | Myosin phosphatase Rho-<br>interacting protein           | MPRIP   | 289  | S | 0.999 | 81.53 | 1.37 | 1.42 | 1.40 | 1.30 | NaN  | 1.15 | 1.45 | 1.44 | 1.12 |
| A0A494BZV2 | Myosin phosphatase Rho-<br>interacting protein           | MPRIP   | 292  | S | 0.819 | 81.53 | 1.37 | 1.42 | 1.40 | 1.30 | NaN  | NaN  | 1.45 | NaN  | NaN  |
| A0A494BZV2 | Myosin phosphatase Rho-<br>interacting protein           | MPRIP   | 483  | S | 0.672 | 197.4 | 2.00 | 1.97 | NaN  | NaN  | 2.09 | 1.14 | NaN  | NaN  | NaN  |
| A0A494BZV2 | Myosin phosphatase Rho-<br>interacting protein           | MPRIP   | 220  | S | 0.969 | 166.1 | 1.45 | 1.15 | 1.57 | 1.69 | 1.19 | 1.65 | 1.11 | 1.76 | 1.06 |
| A0A494BZV2 | Myosin phosphatase Rho-<br>interacting protein           | MPRIP   | 224  | S | 0.998 | 166.1 | 1.45 | 1.15 | 1.54 | 1.57 | 1.22 | 1.65 | 1.00 | 1.46 | 1.04 |
| A0A494BZV2 | Myosin phosphatase Rho-<br>interacting protein           | MPRIP   | 737  | S | 1     | 121.6 | 1.37 | 1.29 | 1.24 | NaN  | 1.80 | 1.69 | 0.84 | 0.81 | 0.74 |
| A0A494BZV2 | Myosin phosphatase Rho-<br>interacting protein           | MPRIP   | 2380 | S | 0.998 | 84.76 | NaN  | 1.29 | 1.33 | 1.43 | 1.41 | 1.34 | 2.00 | 1.76 | 1.74 |
| A0A494C050 | NF-kappa-B-activating protein                            | NKAP    | 149  | S | 1     | 111.7 | 0.99 | 1.05 | 1.07 | 0.86 | 1.01 | 1.13 | 0.96 | 1.00 | 0.95 |
| H0Y6K5     | Transcription factor Sp3                                 | SP3     | 5    | S | 1     | 128.3 | 0.94 | NaN  | NaN  | 0.76 | NaN  | 0.89 | NaN  | NaN  | 1.47 |
| D6RC77     | Phosphoacetylglucosamine<br>mutase                       | PGM3    | 92   | S | 0.751 | 203.3 | 0.47 | 0.48 | NaN  | 0.72 | NaN  | NaN  | NaN  | 0.47 | NaN  |
| A0A494C0B4 | UV excision repair protein<br>RAD23 homolog A            | RAD23A  | 128  | S | 0.761 | 117.4 | NaN  | NaN  | NaN  | 0.76 | NaN  | 0.76 | NaN  | NaN  | NaN  |
| A0A494C0B4 | UV excision repair protein<br>RAD23 homolog A            | RAD23A  | 133  | S | 0.86  | 82.51 | 0.50 | NaN  | 0.57 | NaN  | NaN  | NaN  | NaN  | NaN  | NaN  |
| A0A494C0Q6 | Poly(A)-specific ribonuclease<br>PARN                    | PARN    | 561  | S | 1     | 73.35 | 1.05 | NaN  | 1.60 | NaN  | 1.12 | 1.66 | 1.30 | NaN  | 1.61 |

|            |                                                         |          |      |   |       |       |      |      |      |      |      |      |      |      |      |
|------------|---------------------------------------------------------|----------|------|---|-------|-------|------|------|------|------|------|------|------|------|------|
| H7BZ50     | Mitotic-spindle organizing protein 2B                   | MZT2B    | 115  | S | 0.949 | 86.26 | 0.87 | NaN  | 0.96 | NaN  | NaN  | NaN  | 1.01 | 0.91 | NaN  |
| A0A494C108 | Protein KRI1 homolog                                    | KRI1     | 177  | S | 1     | 327.6 | 1.14 | 1.13 | 1.14 | 1.10 | 1.23 | 1.22 | 1.13 | 1.27 | 1.20 |
| A0A494C108 | Protein KRI1 homolog                                    | KRI1     | 634  | S | 1     | 173.6 | 0.51 | 0.43 | 0.65 | 0.44 | 0.52 | 1.06 | 0.61 | 0.75 | 0.88 |
| A0A494C108 | Protein KRI1 homolog                                    | KRI1     | 645  | S | 1     | 148.4 | NaN  | 0.77 | 1.11 | 1.22 | NaN  | 1.06 | 0.66 | 0.61 | NaN  |
| A0A494C108 | Protein KRI1 homolog                                    | KRI1     | 142  | S | 1     | 78.09 | 1.29 | NaN  | 1.40 | 1.04 | 1.17 | NaN  | NaN  | 1.01 | NaN  |
| A0A494C198 | Protein DEK                                             | DEK      | 229  | S | 1     | 124.1 | 0.75 | 0.83 | 0.80 | 0.89 | 0.90 | 0.86 | 0.84 | 0.89 | 0.84 |
| A0A494C198 | Protein DEK                                             | DEK      | 231  | S | 1     | 124.1 | 0.75 | 0.83 | 0.80 | 0.89 | 0.90 | 0.86 | 0.84 | 0.82 | 0.81 |
| A0A494C198 | Protein DEK                                             | DEK      | 234  | S | 1     | 124.1 | 0.75 | 0.83 | 0.80 | 0.89 | 0.91 | 0.85 | 0.82 | 0.82 | 0.81 |
| A0A494C198 | Protein DEK                                             | DEK      | 235  | S | 1     | 124.1 | 0.75 | 0.83 | 0.80 | 0.89 | 0.91 | 0.85 | 0.82 | 0.82 | 0.81 |
| A0A494C1A5 | U5 small nuclear ribonucleoprotein 200 kDa helicase     | SNRNP200 | 225  | S | 1     | 440.6 | 0.62 | 0.64 | 0.62 | 0.83 | 0.70 | 0.77 | 0.67 | 0.66 | 0.67 |
| A0A494C1F2 | Nuclear pore complex protein Nup214                     | NUP214   | 666  | S | 1     | 85.62 | 0.89 | 0.80 | 0.82 | 0.94 | 0.96 | 0.95 | 0.84 | 0.85 | 0.87 |
| A0A494C1F2 | Nuclear pore complex protein Nup214                     | NUP214   | 430  | S | 0.983 | 132.4 | 0.46 | 0.42 | 1.58 | 0.60 | 1.38 | 1.27 | NaN  | 0.63 | NaN  |
| A0A494C1F2 | Nuclear pore complex protein Nup214                     | NUP214   | 433  | S | 0.829 | 71.4  | NaN  | NaN  | NaN  | NaN  | NaN  | NaN  | 0.66 | NaN  | 0.64 |
| C9J8U1     | Cytospin-A                                              | SPECC1L  | 384  | S | 1     | 110.6 | 0.71 | NaN  | NaN  | NaN  | 0.91 | 0.46 | 1.00 | 1.14 | 1.36 |
| C9J8U1     | Cytospin-A                                              | SPECC1L  | 385  | S | 1     | 110.6 | 0.71 | NaN  | NaN  | NaN  | 0.91 | 0.46 | 1.00 | 1.14 | 1.36 |
| A0A494C1K3 | General transcription factor II-I                       | GTF2I    | 984  | S | 0.999 | 154.9 | 0.59 | 0.63 | 0.61 | 0.74 | 0.73 | 0.69 | 0.88 | 0.83 | 0.85 |
| C9JXK0     | Lamin-B receptor                                        | LBR      | 84   | S | 1     | 94.69 | NaN  | 0.95 | 1.05 | NaN  | 0.99 | 0.99 | NaN  | NaN  | NaN  |
| C9JXK0     | Lamin-B receptor                                        | LBR      | 86   | S | 1     | 87.22 | 0.35 | 0.95 | 1.05 | NaN  | 0.99 | 0.99 | NaN  | NaN  | NaN  |
| Q7Z6P5     | DNA replication licensing factor MCM3                   | MCM3     | 206  | S | 0.991 | 246.4 | 0.59 | 0.60 | 0.62 | 0.85 | 0.88 | 0.78 | 0.46 | 0.46 | 0.48 |
| Q7Z6P5     | DNA replication licensing factor MCM3                   | MCM3     | 167  | S | 1     | 196.8 | 0.82 | 0.83 | NaN  | NaN  | NaN  | NaN  | 3.06 | 2.94 | 1.06 |
| H0Y917     | WD repeat-containing protein 26                         | WDR26    | 113  | S | 0.999 | 82.65 | 0.76 | 1.08 | NaN  | NaN  | 1.26 | NaN  | NaN  | NaN  | NaN  |
| A0A499FJ14 | E3 ubiquitin-protein ligase MYCBP2                      | MYCBP2   | 2751 | S | 0.972 | 64.24 | 0.57 | 0.78 | NaN  | 0.68 | 0.63 | NaN  | NaN  | NaN  | NaN  |
| A0A499FJ14 | E3 ubiquitin-protein ligase MYCBP2                      | MYCBP2   | 3467 | S | 0.965 | 47.64 | NaN  | NaN  | NaN  | NaN  | 1.49 | NaN  | 1.65 | 1.41 | NaN  |
| A0A499FJS7 | Inhibitor of nuclear factor kappa-B kinase subunit beta | IKBKB    | 608  | S | 0.932 | 66.51 | NaN  | NaN  | 0.78 | 1.09 | 0.95 | 1.04 | NaN  | 0.65 | 0.66 |
| A0A4W8VX11 | Pericentriolar material 1                               | PCM1     | 1676 | S | 1     | 167.6 | 0.50 | 0.60 | NaN  | 0.43 | NaN  | 0.84 | NaN  | 0.72 | NaN  |
| A0A4W8VX11 | Pericentriolar material 1                               | PCM1     | 1711 | S | 1     | 156.6 | 0.62 | 1.46 | 1.15 | 0.73 | 1.34 | 0.69 | 1.41 | 1.35 | 1.73 |
| A0A4W8VX11 | Pericentriolar material 1                               | PCM1     | 1714 | S | 1     | 123.2 | 1.52 | 1.46 | 0.62 | 1.38 | 1.34 | 1.04 | 0.67 | 1.35 | 0.62 |
| A0A4W8VX11 | Pericentriolar material 1                               | PCM1     | 862  | S | 0.999 | 150   | NaN  | NaN  | 0.41 | 0.46 | NaN  | NaN  | 0.55 | NaN  | 0.79 |
| A0A4W8VX11 | Pericentriolar material 1                               | PCM1     | 65   | S | 0.998 | 172.6 | 0.76 | 0.80 | 0.79 | 0.76 | 0.73 | 0.75 | 0.89 | 0.95 | 0.97 |
| H0Y8W5     | Rho GTPase-activating protein 10                        | ARHGAP10 | 269  | S | 0.981 | 67.08 | NaN  | NaN  | 1.29 | NaN  | NaN  | 1.14 | 1.09 | NaN  | 1.15 |
| A1L170     | Uncharacterized protein C1orf226                        | C1orf226 | 223  | S | 0.989 | 78.34 | 1.15 | 1.21 | NaN  | 1.23 | 1.37 | 1.27 | NaN  | 1.34 | 1.30 |
| A1L170     | Uncharacterized protein C1orf226                        | C1orf226 | 249  | S | 1     | 150   | 1.18 | 1.22 | 1.34 | 1.20 | 1.07 | 1.03 | 1.05 | 1.14 | 0.89 |



|        |                                                                                                     |          |      |   |       |       |      |      |      |      |      |      |      |      |      |
|--------|-----------------------------------------------------------------------------------------------------|----------|------|---|-------|-------|------|------|------|------|------|------|------|------|------|
| A2A2D0 | Stathmin                                                                                            | STMN1    | 16   | S | 1     | 222.4 | 2.01 | 2.10 | 2.12 | 2.50 | 2.50 | NaN  | 1.50 | 1.40 | 1.59 |
| A2A2D0 | Stathmin                                                                                            | STMN1    | 25   | S | 1     | 455.1 | 5.68 | 5.70 | 5.91 | 6.11 | 6.27 | 6.48 | 1.66 | 1.64 | 1.63 |
| A2A2D0 | Stathmin;Stathmin-2                                                                                 | STMN1    | 46   | S | 1     | 96.24 | 1.77 | NaN  | NaN  | 2.56 | 2.68 | NaN  | 0.76 | 0.79 | NaN  |
| A2A2D0 | Stathmin                                                                                            | STMN1    | 38   | S | 1     | 200.8 | 1.38 | 1.36 | 1.37 | 2.14 | 2.18 | 2.01 | 0.73 | 0.68 | 0.75 |
| A2A2D0 | Stathmin                                                                                            | STMN1    | 63   | S | 1     | 130.7 | 2.48 | 2.29 | 2.66 | 4.42 | 3.31 | 3.89 | 0.66 | 0.59 | 0.71 |
| H7C5M1 | RNA-binding protein 34                                                                              | RBM34    | 31   | S | 1     | 110   | NaN  | NaN  | NaN  | 0.79 | 0.55 | NaN  | NaN  | NaN  | NaN  |
| A2AAT0 | Zinc transporter SLC39A7                                                                            | SLC39A7  | 185  | S | 1     | 132.7 | 0.93 | 0.99 | 0.92 | 0.97 | 0.97 | 0.97 | 0.95 | 0.99 | 0.99 |
| A2AAT0 | Zinc transporter SLC39A7                                                                            | SLC39A7  | 186  | S | 1     | 132.7 | 0.93 | 0.96 | 0.92 | 0.97 | 0.97 | 0.97 | 0.95 | 0.99 | 0.99 |
| A2RU67 | Uncharacterized protein KIAA1467                                                                    | KIAA1467 | 30   | S | 1     | 104.3 | 1.90 | 1.44 | NaN  | 1.59 | NaN  | NaN  | NaN  | NaN  | NaN  |
| A2RU67 | Uncharacterized protein KIAA1467                                                                    | KIAA1467 | 33   | S | 0.999 | 104.3 | 1.90 | 1.44 | NaN  | 1.59 | NaN  | NaN  | NaN  | NaN  | NaN  |
| A6NL93 | Non-histone chromosomal protein HMG-14                                                              | HMGN1    | 76   | S | 0.999 | 170.9 | 0.67 | 0.66 | 0.72 | 0.69 | 0.52 | 0.79 | 0.84 | 1.01 | 0.63 |
| A6NL93 | Non-histone chromosomal protein HMG-14                                                              | HMGN1    | 79   | S | 1     | 152.6 | 0.59 | 0.64 | 0.69 | 0.60 | 0.55 | 0.58 | 0.72 | 0.83 | 0.77 |
| A6NL93 | Non-histone chromosomal protein HMG-14                                                              | HMGN1    | 89   | S | 1     | 129.8 | 0.80 | 0.72 | NaN  | 0.81 | 0.71 | 0.68 | 0.64 | 0.72 | 0.71 |
| A6NGP5 | Hematological and neurological expressed 1-like Annexin A2;Putative annexin A2-like protein;Annexin | HN1L     | 18   | S | 0.998 | 156.3 | 2.37 | NaN  | 2.34 | 5.13 | 4.25 | 6.13 | 0.81 | 0.61 | NaN  |
| P07355 | Tumor suppressor p53-binding protein 1                                                              | ANXA2    | 26   | S | 0.774 | 154.1 | NaN  | NaN  | 0.74 | NaN  | 0.90 | NaN  | NaN  | 0.80 | 0.85 |
| A6NNK5 | Tumor suppressor p53-binding protein 1                                                              | TP53BP1  | 1381 | S | 1     | 92.9  | 0.73 | 0.61 | NaN  | 0.95 | 1.22 | 0.99 | 0.99 | 1.21 | NaN  |
| A6NNK5 | Tumor suppressor p53-binding protein 1                                                              | TP53BP1  | 1385 | S | 1     | 92.9  | 0.53 | 0.61 | NaN  | 0.71 | 1.22 | 0.99 | 0.64 | 0.96 | 1.02 |
| A6NNK5 | Tumor suppressor p53-binding protein 1                                                              | TP53BP1  | 585  | S | 0.979 | 135.9 | 0.61 | 0.52 | NaN  | 0.96 | NaN  | 0.91 | 1.03 | NaN  | 0.97 |
| A6NNK5 | Tumor suppressor p53-binding protein 1                                                              | TP53BP1  | 557  | S | 0.998 | 121.7 | 0.48 | 0.46 | 0.50 | 0.62 | 0.63 | 0.76 | 0.62 | 0.59 | 0.63 |
| A6NNK5 | Tumor suppressor p53-binding protein 1                                                              | TP53BP1  | 1118 | S | 0.572 | 106.2 | 0.38 | 0.37 | NaN  | 0.61 | 0.61 | 0.43 | NaN  | 0.47 | NaN  |
| A6NNK5 | Tumor suppressor p53-binding protein 1                                                              | TP53BP1  | 1119 | S | 0.994 | 212.4 | 0.38 | 0.32 | 0.36 | 0.54 | 0.61 | 0.59 | 0.42 | 0.43 | 0.42 |
| A6NNK5 | Tumor suppressor p53-binding protein 1                                                              | TP53BP1  | 505  | S | 1     | 160.8 | 0.54 | 0.49 | 0.66 | 0.95 | 0.86 | 0.69 | 0.98 | 1.04 | 0.98 |
| A6NNK5 | Tumor suppressor p53-binding protein 1                                                              | TP53BP1  | 1099 | S | 1     | 150.6 | 0.44 | 0.47 | NaN  | 0.54 | 0.57 | 0.49 | 0.50 | 0.50 | 0.49 |
| A6NNK5 | Tumor suppressor p53-binding protein 1                                                              | TP53BP1  | 1106 | S | 0.975 | 125   | 0.44 | 0.46 | NaN  | 0.84 | 0.72 | 0.49 | NaN  | NaN  | 0.49 |
| A6NNK5 | Tumor suppressor p53-binding protein 1                                                              | TP53BP1  | 1109 | S | 0.836 | 150.6 | NaN  | NaN  | NaN  | NaN  | NaN  | NaN  | 0.52 | 0.55 | NaN  |
| A6NNK5 | Tumor suppressor p53-binding protein 1                                                              | TP53BP1  | 270  | S | 1     | 97.91 | 0.64 | 0.62 | NaN  | 0.99 | 0.89 | 0.93 | 0.89 | 0.94 | 0.86 |
| A6NNK5 | Tumor suppressor p53-binding protein 1                                                              | TP53BP1  | 1713 | S | 0.963 | 141.1 | NaN  | 0.59 | 0.90 | 0.87 | NaN  | 0.84 | 1.11 | 1.04 | 1.07 |

|        |                                             |          |      |   |       |       |      |      |      |      |      |      |      |      |      |
|--------|---------------------------------------------|----------|------|---|-------|-------|------|------|------|------|------|------|------|------|------|
| A6NNK5 | Tumor suppressor p53-binding protein 1      | TP53BP1  | 1714 | S | 0.988 | 141.1 | NaN  | 0.59 | 0.90 | 0.87 | NaN  | 0.84 | 1.11 | 1.04 | 1.07 |
| A6NNK5 | Tumor suppressor p53-binding protein 1      | TP53BP1  | 385  | S | 0.938 | 166.5 | 0.68 | NaN  | 0.75 | 0.67 | 0.85 | NaN  | 1.01 | 0.82 | 1.37 |
| G3V174 | Rho GTPase-activating protein 32            | ARHGAP32 | 782  | S | 1     | 169.9 | NaN  | NaN  | NaN  | NaN  | NaN  | NaN  | 1.87 | 1.82 | 2.67 |
| G3V174 | Rho GTPase-activating protein 32            | ARHGAP32 | 797  | S | 0.999 | 204   | 1.08 | 0.92 | 0.90 | 0.91 | 0.93 | 0.59 | 1.16 | 1.39 | 1.18 |
| A8MQ02 | Afadin                                      | MLLT4    | 1736 | S | 1     | 208.5 | 0.61 | 0.62 | 0.68 | 0.80 | NaN  | 0.79 | 1.03 | 1.04 | 0.88 |
| A8MQ02 | Afadin                                      | MLLT4    | 1141 | S | 1     | 100.4 | NaN  | 0.66 | NaN  | NaN  | NaN  | 0.93 | NaN  | 0.99 | 1.27 |
| A8MQ02 | Afadin                                      | MLLT4    | 1042 | S | 0.991 | 107.2 | 3.79 | NaN  | NaN  | 2.99 | NaN  | 3.33 | 0.86 | NaN  | NaN  |
| H7BY10 | 60S ribosomal protein L23a                  | RPL23A   | 45   | S | 0.715 | 60.75 | 1.26 | 1.25 | NaN  | NaN  | NaN  | NaN  | NaN  | NaN  | NaN  |
| A8MZ87 | Kinesin light chain 2                       | KLC2     | 306  | S | 0.991 | 63.91 | NaN  | 0.95 | 1.13 | 1.24 | NaN  | 1.38 | 1.20 | 0.96 | 2.00 |
| A9Z1X7 | Serine/arginine repetitive matrix protein 1 | SRRM1    | 747  | S | 1     | 120.2 | 1.04 | 1.18 | 1.02 | 0.80 | 1.04 | 0.75 | 1.01 | 1.13 | 0.85 |
| A9Z1X7 | Serine/arginine repetitive matrix protein 1 | SRRM1    | 749  | S | 1     | 98.44 | 1.09 | 1.11 | 1.16 | 1.07 | 1.04 | 1.03 | 1.26 | 1.13 | 1.19 |
| A9Z1X7 | Serine/arginine repetitive matrix protein 1 | SRRM1    | 800  | S | 1     | 61.1  | 0.67 | 0.70 | NaN  | NaN  | 0.82 | 0.85 | NaN  | 1.06 | NaN  |
| A9Z1X7 | Serine/arginine repetitive matrix protein 1 | SRRM1    | 804  | S | 1     | 61.1  | 0.67 | 0.70 | NaN  | NaN  | 0.82 | 0.85 | NaN  | 1.06 | NaN  |
| A9Z1X7 | Serine/arginine repetitive matrix protein 1 | SRRM1    | 806  | S | 1     | 61.1  | 0.67 | 0.70 | NaN  | NaN  | 0.82 | 0.85 | NaN  | 1.06 | NaN  |
| A9Z1X7 | Serine/arginine repetitive matrix protein 1 | SRRM1    | 703  | S | 0.733 | 53.4  | NaN  | NaN  | NaN  | 1.08 | 0.98 | 0.96 | NaN  | 1.23 | 1.18 |
| A9Z1X7 | Serine/arginine repetitive matrix protein 1 | SRRM1    | 704  | S | 0.965 | 121.6 | NaN  | NaN  | 1.11 | 1.08 | 1.01 | 0.96 | 0.96 | 0.93 | 0.85 |
| A9Z1X7 | Serine/arginine repetitive matrix protein 1 | SRRM1    | 705  | S | 0.948 | 191   | 1.15 | 1.10 | NaN  | 1.04 | NaN  | NaN  | 1.15 | 1.12 | NaN  |
| A9Z1X7 | Serine/arginine repetitive matrix protein 1 | SRRM1    | 684  | S | 1     | 95.48 | 1.20 | 1.24 | 1.27 | 1.04 | 1.17 | 1.05 | NaN  | 1.02 | NaN  |
| A9Z1X7 | Serine/arginine repetitive matrix protein 1 | SRRM1    | 397  | S | 1     | 152   | 0.41 | 0.39 | 0.43 | 0.59 | 0.56 | 0.57 | 0.50 | 0.50 | 0.51 |
| A9Z1X7 | Serine/arginine repetitive matrix protein 1 | SRRM1    | 883  | S | 1     | 180   | 1.38 | 1.48 | 1.59 | 1.42 | 1.67 | 1.53 | 1.29 | 1.77 | 1.50 |
| A9Z1X7 | Serine/arginine repetitive matrix protein 1 | SRRM1    | 778  | S | 1     | 203.3 | 0.67 | 0.76 | 0.74 | 0.88 | 0.79 | 0.93 | 0.52 | 0.59 | 0.60 |
| A9Z1X7 | Serine/arginine repetitive matrix protein 1 | SRRM1    | 784  | S | 1     | 203.3 | 0.89 | 0.84 | 0.86 | 0.96 | 1.03 | 0.94 | 0.86 | 0.85 | 0.87 |
| A9Z1X7 | Serine/arginine repetitive matrix protein 1 | SRRM1    | 790  | S | 0.849 | 88.84 | NaN  | NaN  | 1.23 | 1.24 | 0.83 | 1.32 | 1.03 | 1.07 | 1.56 |
| A9Z1X7 | Serine/arginine repetitive matrix protein 1 | SRRM1    | 458  | S | 1     | 104.3 | 1.43 | 1.48 | 0.65 | 1.25 | 1.32 | 1.27 | 1.07 | 1.24 | 0.77 |
| A9Z1X7 | Serine/arginine repetitive matrix protein 1 | SRRM1    | 460  | S | 1     | 104.3 | 1.43 | 1.48 | 1.13 | 1.25 | 1.32 | 1.27 | 1.07 | 1.24 | 1.31 |
| A9Z1X7 | Serine/arginine repetitive matrix protein 1 | SRRM1    | 654  | S | 0.755 | 59.37 | NaN  | 1.01 | NaN  | 1.01 | 1.09 | NaN  | 1.09 | NaN  | 1.15 |

|        |                                             |       |     |   |       |       |      |      |      |      |      |      |      |      |      |
|--------|---------------------------------------------|-------|-----|---|-------|-------|------|------|------|------|------|------|------|------|------|
| A9Z1X7 | Serine/arginine repetitive matrix protein 1 | SRRM1 | 635 | S | 1     | 65.3  | 0.90 | 0.96 | 0.97 | 0.92 | 0.79 | 0.89 | 0.99 | 0.91 | 0.85 |
| A9Z1X7 | Serine/arginine repetitive matrix protein 1 | SRRM1 | 637 | S | 1     | 65.3  | 0.90 | 0.96 | 0.97 | 0.92 | 0.79 | 0.89 | 0.99 | 0.91 | 0.85 |
| A9Z1X7 | Serine/arginine repetitive matrix protein 1 | SRRM1 | 445 | S | 0.999 | 131.9 | 1.21 | 1.11 | 1.18 | 1.08 | 1.08 | 1.07 | 1.11 | 1.10 | 1.13 |
| A9Z1X7 | Serine/arginine repetitive matrix protein 1 | SRRM1 | 384 | S | 1     | 128.1 | 0.70 | 0.70 | 0.72 | 1.38 | 0.74 | 0.71 | 0.76 | 0.78 | 0.80 |
| A9Z1X7 | Serine/arginine repetitive matrix protein 1 | SRRM1 | 386 | S | 1     | 117.2 | 0.70 | 0.70 | 0.72 | 0.72 | 0.76 | 0.71 | NaN  | 0.78 | NaN  |
| A9Z1X7 | Serine/arginine repetitive matrix protein 1 | SRRM1 | 388 | S | 1     | 128.1 | 1.65 | 1.91 | 1.76 | 0.72 | 0.76 | NaN  | 0.76 | 0.78 | 0.80 |
| A9Z1X7 | Serine/arginine repetitive matrix protein 1 | SRRM1 | 722 | S | 1     | 78.69 | 0.97 | 1.23 | 1.11 | 1.00 | NaN  | 0.98 | 0.97 | 0.99 | 0.93 |
| A9Z1X7 | Serine/arginine repetitive matrix protein 1 | SRRM1 | 724 | S | 0.996 | 68.28 | 0.87 | NaN  | 1.15 | 1.06 | 1.09 | 1.01 | NaN  | 0.98 | NaN  |
| A9Z1X7 | Serine/arginine repetitive matrix protein 1 | SRRM1 | 726 | S | 0.75  | 65.04 | NaN  | NaN  | 1.02 | 1.08 | NaN  | NaN  | 1.21 | 0.93 | 0.96 |
| A9Z1X7 | Serine/arginine repetitive matrix protein 1 | SRRM1 | 662 | S | 1     | 115.3 | 1.00 | 0.99 | 1.02 | 0.96 | 0.99 | 0.97 | 0.95 | NaN  | 0.96 |
| A9Z1X7 | Serine/arginine repetitive matrix protein 1 | SRRM1 | 569 | S | 1     | 100.8 | 0.52 | 0.57 | 0.54 | 0.78 | 0.78 | 0.68 | 0.61 | 0.61 | 0.55 |
| A9Z1X7 | Serine/arginine repetitive matrix protein 1 | SRRM1 | 571 | S | 1     | 100.8 | 1.41 | 1.48 | 1.45 | 1.25 | 1.22 | 1.17 | 1.37 | 1.46 | 1.38 |
| A9Z1X7 | Serine/arginine repetitive matrix protein 1 | SRRM1 | 558 | S | 1     | 62.68 | 1.05 | 1.08 | NaN  | NaN  | 0.99 | 0.96 | NaN  | NaN  | NaN  |
| A9Z1X7 | Serine/arginine repetitive matrix protein 1 | SRRM1 | 560 | S | 1     | 62.68 | 1.05 | 1.08 | NaN  | NaN  | 0.99 | 0.96 | NaN  | NaN  | NaN  |
| A9Z1X7 | Serine/arginine repetitive matrix protein 1 | SRRM1 | 592 | S | 1     | 65.88 | 1.15 | 1.15 | 1.31 | 1.14 | 1.19 | 1.24 | 1.24 | 1.27 | 1.32 |
| A9Z1X7 | Serine/arginine repetitive matrix protein 1 | SRRM1 | 645 | S | 1     | 64.5  | 1.05 | 1.08 | 0.79 | 1.04 | NaN  | NaN  | 1.04 | 1.00 | 1.01 |
| A9Z1X7 | Serine/arginine repetitive matrix protein 1 | SRRM1 | 647 | S | 1     | 77.38 | 0.92 | 1.08 | 0.79 | 0.78 | NaN  | 0.69 | 1.04 | 0.79 | 0.74 |
| A9Z1X7 | Serine/arginine repetitive matrix protein 1 | SRRM1 | 763 | S | 1     | 190.2 | 0.54 | 0.88 | 0.56 | 0.63 | 0.64 | 0.62 | 0.56 | 0.74 | 0.69 |
| A9Z1X7 | Serine/arginine repetitive matrix protein 1 | SRRM1 | 765 | S | 1     | 190.2 | 0.57 | 0.61 | 0.56 | 0.60 | 0.59 | 0.55 | 0.51 | 0.49 | 0.45 |
| A9Z1X7 | Serine/arginine repetitive matrix protein 1 | SRRM1 | 547 | S | 0.997 | 50.83 | 2.00 | 2.08 | 2.29 | NaN  | NaN  | 1.60 | 1.61 | 1.54 | 1.76 |
| A9Z1X7 | Serine/arginine repetitive matrix protein 1 | SRRM1 | 606 | S | 1     | 101.5 | 1.49 | 1.56 | 1.81 | 1.46 | 0.98 | 1.45 | 1.63 | 1.02 | 1.71 |
| A9Z1X7 | Serine/arginine repetitive matrix protein 1 | SRRM1 | 614 | S | 0.919 | 79.89 | NaN  | 1.07 | 1.05 | 0.99 | 0.97 | 0.97 | 1.05 | 1.02 | 1.02 |
| A9Z1X7 | Serine/arginine repetitive matrix protein 1 | SRRM1 | 616 | S | 1     | 79.89 | NaN  | 1.07 | 1.05 | 0.99 | 0.97 | 0.97 | 1.05 | 1.02 | 1.02 |
| A9Z1X7 | Serine/arginine repetitive matrix protein 1 | SRRM1 | 424 | S | 0.998 | 79.8  | 1.52 | 1.58 | 1.59 | 1.37 | 1.35 | 1.37 | 1.47 | 1.48 | NaN  |

|        |                                                                |           |     |   |       |       |      |      |      |      |      |      |      |      |      |
|--------|----------------------------------------------------------------|-----------|-----|---|-------|-------|------|------|------|------|------|------|------|------|------|
| A9Z1X7 | Serine/arginine repetitive matrix protein 1                    | SRRM1     | 426 | S | 1     | 79.8  | 0.69 | 0.71 | 0.74 | 0.66 | 0.69 | 0.68 | 0.71 | 0.74 | NaN  |
| A9Z1X7 | Serine/arginine repetitive matrix protein 1                    | SRRM1     | 625 | S | 1     | 129   | 0.90 | 0.95 | 0.96 | 1.36 | 1.00 | 0.91 | 1.24 | 0.91 | 0.94 |
| A9Z1X7 | Serine/arginine repetitive matrix protein 1                    | SRRM1     | 409 | S | 0.996 | 81.43 | NaN  | 1.28 | 1.08 | 0.95 | NaN  | 0.97 | NaN  | 1.14 | 1.12 |
| A9Z1X7 | Serine/arginine repetitive matrix protein 1                    | SRRM1     | 375 | S | 0.993 | 78.15 | 1.08 | 1.06 | 1.07 | 1.00 | NaN  | NaN  | 1.02 | NaN  | NaN  |
| A9Z1X7 | Serine/arginine repetitive matrix protein 1                    | SRRM1     | 260 | S | 1     | 108.3 | 0.90 | 0.90 | 0.95 | 0.93 | 0.95 | 0.96 | 0.96 | 0.99 | 0.98 |
| B7Z2E6 | 14-3-3 protein zeta/delta                                      | YWHAZ     | 87  | S | 0.994 | 134.5 | 0.84 | 0.72 | 0.74 | 0.73 | NaN  | 0.73 | 1.23 | NaN  | 0.97 |
| B0YIW6 | Coatomer subunit delta                                         | ARCN1     | 534 | S | 1     | 84.89 | 2.00 | 2.12 | 1.72 | 2.37 | 2.39 | 2.34 | 0.80 | 0.90 | 1.06 |
| F5H7V1 | Nardilysin                                                     | NRD1      | 94  | S | 0.998 | 115.6 | 1.18 | 1.17 | 1.20 | 1.22 | 1.30 | NaN  | 1.11 | 0.93 | 1.18 |
| F5H7V1 | Nardilysin                                                     | NRD1      | 96  | S | 0.565 | 82.93 | NaN  | NaN  | NaN  | NaN  | 1.25 | NaN  | 0.99 | 1.09 | NaN  |
| B1AKL4 | Eukaryotic translation initiation factor 4E transporter        | EIF4ENIF1 | 563 | S | 0.996 | 84.69 | 2.23 | 2.32 | NaN  | NaN  | NaN  | NaN  | 1.03 | 1.88 | 1.05 |
| B1AKL4 | Eukaryotic translation initiation factor 4E transporter        | EIF4ENIF1 | 927 | S | 0.921 | 44.57 | NaN  | 1.97 | NaN  | NaN  | 1.61 | NaN  | 1.16 | NaN  | 1.31 |
| B1AKN3 | Arginine-glutamic acid dipeptide repeats protein               | RERE      | 838 | S | 1     | 126.6 | 1.36 | 1.00 | NaN  | NaN  | NaN  | NaN  | 0.88 | NaN  | NaN  |
| B1AKN3 | Arginine-glutamic acid dipeptide repeats protein               | RERE      | 845 | S | 0.992 | 126.6 | 1.36 | 1.00 | NaN  | NaN  | NaN  | NaN  | 0.88 | NaN  | NaN  |
| B1AKN3 | Arginine-glutamic acid dipeptide repeats protein               | RERE      | 847 | S | 0.992 | 126.6 | 1.36 | 1.00 | NaN  | NaN  | NaN  | NaN  | 0.88 | NaN  | NaN  |
| B1AKZ5 | Astrocytic phosphoprotein PEA-15                               | PEA15     | 94  | S | 1     | 172.7 | 1.42 | 1.41 | 1.39 | 1.23 | 1.27 | 1.30 | 1.37 | 1.41 | 1.42 |
| E5RHT1 | Presenilin-2;Presenilin-2 NTF subunit;Presenilin-2 CTF subunit | PSEN2     | 25  | S | 0.998 | 181.9 | 0.51 | 0.50 | NaN  | NaN  | NaN  | NaN  | 0.49 | NaN  | NaN  |
| B1AUU8 | Epidermal growth factor receptor substrate 15                  | EPS15     | 662 | S | 1     | 78.66 | 1.45 | 1.59 | 1.73 | 1.43 | 1.32 | NaN  | 1.34 | 1.53 | 1.81 |
| B1AUU8 | Epidermal growth factor receptor substrate 15                  | EPS15     | 680 | S | 0.998 | 45.55 | 0.73 | 1.80 | NaN  | NaN  | NaN  | NaN  | NaN  | NaN  | NaN  |
| B1AUU8 | Epidermal growth factor receptor substrate 15                  | EPS15     | 428 | S | 0.5   | 111.2 | NaN  | 0.97 | NaN  | NaN  | NaN  | NaN  | 0.93 | NaN  | 0.86 |
| B1AUU8 | Epidermal growth factor receptor substrate 15                  | EPS15     | 429 | S | 0.5   | 111.2 | NaN  | 0.97 | NaN  | NaN  | NaN  | NaN  | 0.93 | NaN  | 0.86 |
| H0YCM0 | Non-specific serine/threonine kinase;Serine/threonine-         | PAK1      | 65  | S | 1     | 166.5 | 0.96 | 1.09 | NaN  | 0.94 | 1.00 | 0.86 | NaN  | 1.07 | 0.97 |
| B3KR00 | AMSH-like protease                                             | STAMBPL1  | 76  | S | 0.983 | 71.39 | NaN  | NaN  | 1.05 | 0.99 | 0.66 | 0.93 | NaN  | NaN  | NaN  |
| H3BN34 | Pyruvate kinase;Pyruvate kinase PKM                            | PKM       | 37  | S | 1     | 151.5 | NaN  | 1.36 | 1.35 | 1.35 | NaN  | 1.24 | 1.14 | 1.20 | 1.13 |
| C9JUN4 | Phosphoribosyl pyrophosphate synthase-                         | PRPSAP1   | 141 | S | 1     | 226.1 | 0.57 | 0.58 | 0.66 | 0.65 | 0.75 | 0.72 | NaN  | 0.50 | NaN  |

|        |                                                                                                                        |        |         |   |       |       |      |      |      |      |      |      |      |      |      |      |
|--------|------------------------------------------------------------------------------------------------------------------------|--------|---------|---|-------|-------|------|------|------|------|------|------|------|------|------|------|
| C9JEN3 | Protein lifeguard 3                                                                                                    | TMBIM1 | 81      | S | 0.999 | 85.52 | NaN  | 1.56 | 1.01 | NaN  | NaN  | NaN  | NaN  | 1.90 | NaN  |      |
| I3L0Y9 | Brain-specific angiogenesis inhibitor 1-associated protein 2                                                           | BAIAP2 | 82      | S | 1     | 89.3  | NaN  | NaN  | 1.36 | 1.23 | 1.26 | 1.28 | 0.84 | 0.90 | 0.89 |      |
| B4DWJ1 | Focal adhesion kinase 1                                                                                                | PTK2   | 220     | S | 0.999 | 79.51 | 2.73 | 2.23 | 2.53 | 1.97 | 2.06 | 2.23 | 1.02 | 1.23 | 1.32 |      |
| G3V2D6 | Heterogeneous nuclear ribonucleoproteins C1/C2                                                                         | HNRNPC | 220;141 | S | 1     | 144.3 | 0.80 | 0.80 | 0.86 | 0.84 | 0.83 | 0.82 | 0.79 | 0.81 | 0.83 |      |
| B4DYP1 | N(G),N(G)-dimethylarginine dimethylaminohydrolase 1                                                                    | DDAH1  | 105     | S | 1     | 44.3  | NaN  | NaN  | 1.77 | 1.01 | NaN  | 1.11 | NaN  | 0.70 | NaN  |      |
| B4E1E0 | CTP synthase;CTP synthase                                                                                              | CTPS1  | 415     | S | 0.571 | 46.5  | NaN  | NaN  | 1.62 | NaN  | NaN  | 0.99 | 2.21 | 1.88 | NaN  |      |
| B4E1E0 | CTP synthase;CTP synthase                                                                                              | CTPS1  | 418     | S | 0.983 | 169.8 | 0.71 | 0.62 | NaN  | 0.53 | 0.51 | 0.46 | 1.23 | 1.47 | 0.88 |      |
| B4E1E0 | CTP synthase;CTP synthase                                                                                              | CTPS1  | 419     | S | 1     | 169.8 | 1.19 | 1.06 | 1.10 | 0.66 | 0.72 | 0.58 | 0.96 | 1.22 | 0.94 |      |
| H7C118 | Protein phosphatase 1 regulatory subunit 7                                                                             | PPP1R7 | 33      | S | 1     | 95.62 | 0.51 | 0.55 | 0.59 | 0.71 | 0.58 | 1.08 | 0.86 | 0.76 | 0.79 |      |
| H7C118 | Protein phosphatase 1 regulatory subunit 7                                                                             | PPP1R7 | 36      | S | 1     | 95.62 | 0.59 | 1.05 | 0.61 | 1.12 | 0.62 | 1.08 | 1.24 | 0.86 | 0.97 |      |
| H7C2Y0 | Septin-2                                                                                                               | 2-Sep  | 73      | S | 1     | 288.9 | 0.95 | 0.93 | 0.94 | 0.88 | 0.87 | 0.94 | 0.97 | 0.99 | 1.07 |      |
| B5MDQ0 | DNA excision repair protein ERCC-6-like                                                                                | ERCC6L | 823     | S | 0.833 | 117.5 | 1.11 | NaN  | 1.12 | NaN  | NaN  | NaN  | NaN  | 1.42 | NaN  |      |
| B5MDQ0 | DNA excision repair protein ERCC-6-like                                                                                | ERCC6L | 946     | S | 1     | 73.5  | 0.76 | 0.77 | NaN  | 0.97 | 0.90 | 0.95 | 1.03 | 1.04 | NaN  |      |
| H3BPE4 | Eukaryotic translation initiation factor 3 subunit C;Eukaryotic translation initiation factor 3 subunit C-like protein | EIF3C  | 13      | S | 0.705 | 85.24 | NaN  | NaN  | NaN  | NaN  | NaN  | NaN  | NaN  | 0.42 | NaN  | 0.49 |
| H3BPE4 | Eukaryotic translation initiation factor 3 subunit C;Eukaryotic translation initiation factor 3 subunit C-like protein | EIF3C  | 15      | S | 0.722 | 85.24 | NaN  | NaN  | NaN  | NaN  | NaN  | NaN  | NaN  | 0.42 | NaN  | 0.49 |
| H3BPE4 | Eukaryotic translation initiation factor 3 subunit C;Eukaryotic translation initiation factor 3 subunit C-like protein | EIF3C  | 16      | S | 0.495 | 83.19 | NaN  | NaN  | NaN  | NaN  | NaN  | NaN  | NaN  | 0.42 | NaN  | 0.49 |
| H3BPE4 | Eukaryotic translation initiation factor 3 subunit C;Eukaryotic translation initiation factor 3 subunit C-like protein | EIF3C  | 18      | S | 0.894 | 85.24 | NaN  | NaN  | NaN  | NaN  | NaN  | NaN  | NaN  | 0.42 | NaN  | 0.49 |
| H3BPE4 | Eukaryotic translation initiation factor 3 subunit C;Eukaryotic translation initiation factor 3 subunit C-like protein | EIF3C  | 39      | S | 1     | 168   | 1.62 | 1.68 | 1.61 | 1.33 | 1.37 | 1.47 | 1.36 | 1.33 | 1.43 |      |
| B7Z4K4 | Putative tRNA (cytidine(32)/guanosine(34)-2'-O)-methyltransferase                                                      | FTSJ1  | 134     | S | 0.983 | 62.61 | 1.16 | 1.38 | NaN  | NaN  | NaN  | NaN  | NaN  | NaN  | NaN  |      |
| B7Z7F3 | Ran-binding protein 3                                                                                                  | RANBP3 | 32      | S | 1     | 171.2 | 0.77 | 0.80 | 0.73 | 0.77 | NaN  | 0.81 | 0.64 | 0.68 | 0.63 |      |
| B7Z7F3 | Ran-binding protein 3                                                                                                  | RANBP3 | 33      | S | 1     | 171.9 | 0.66 | 0.60 | 1.34 | 0.77 | 0.68 | 0.83 | 0.61 | 0.68 | 0.61 |      |
| B7Z7F3 | Ran-binding protein 3                                                                                                  | RANBP3 | 40      | S | 1     | 134.6 | NaN  | 0.27 | 1.00 | NaN  | 0.66 | 0.85 | NaN  | 1.38 | 1.19 |      |
| B7Z7F3 | Ran-binding protein 3                                                                                                  | RANBP3 | 260     | S | 1     | 160.3 | 1.02 | 1.09 | 1.06 | 1.13 | 1.20 | 1.10 | 1.02 | 1.01 | 1.04 |      |

|        |                                                                                               |        |         |   |       |       |      |      |      |      |      |      |      |      |      |
|--------|-----------------------------------------------------------------------------------------------|--------|---------|---|-------|-------|------|------|------|------|------|------|------|------|------|
| F8WF16 | Periphilin-1                                                                                  | PPHLN1 | 138     | S | 0.996 | 110.6 | 0.75 | 0.76 | 0.75 | 0.72 | 0.79 | 0.74 | 0.82 | 0.82 | 0.83 |
| B7ZBM3 | Forkhead box protein P4                                                                       | FOXP4  | 542     | S | 0.873 | 46.84 | NaN  | NaN  | NaN  | NaN  | NaN  | 1.20 | 0.67 | NaN  | 0.65 |
| B7ZKW8 | CapZ-interacting protein                                                                      | RCSD1  | 90;120  | S | 1     | 153.1 | 0.36 | 0.37 | NaN  | NaN  | 0.34 | NaN  | NaN  | NaN  | 0.34 |
| B7ZKW8 | CapZ-interacting protein                                                                      | RCSD1  | 186;216 | S | 0.999 | 128.4 | 0.56 | 0.58 | 0.55 | 0.71 | 0.61 | 0.57 | 0.57 | 0.63 | 0.60 |
| B7ZKW8 | CapZ-interacting protein                                                                      | RCSD1  | 321;351 | S | 1     | 97.78 | 0.49 | 0.52 | 0.58 | 0.68 | 0.72 | 0.70 | 0.73 | 0.68 | 0.69 |
| B7ZKW8 | CapZ-interacting protein                                                                      | RCSD1  | 237;267 | S | 0.619 | 223.3 | 0.47 | NaN  | NaN  | 0.79 | 1.48 | NaN  | NaN  | NaN  | NaN  |
| B7ZKW8 | CapZ-interacting protein                                                                      | RCSD1  | 238;268 | S | 0.834 | 190   | 0.47 | NaN  | NaN  | 0.72 | 1.48 | NaN  | NaN  | NaN  | NaN  |
| B7ZKW8 | CapZ-interacting protein                                                                      | RCSD1  | 53;83   | S | 0.796 | 75.74 | 0.58 | 0.55 | NaN  | NaN  | NaN  | NaN  | NaN  | NaN  | NaN  |
| E5RJM0 | Cytoplasmic polyadenylation element-binding protein 4                                         | CPEB4  | 97      | S | 0.701 | 44.75 | 2.11 | NaN  | 0.82 | NaN  | NaN  | 1.77 | NaN  | NaN  | NaN  |
| B8ZZ08 | Putative RNA-binding protein Luc7-like 1                                                      | LUC7L  | 162     | S | 1     | 72.32 | NaN  | NaN  | 1.23 | 1.04 | NaN  | NaN  | 1.16 | 1.10 | NaN  |
| B8ZZF5 | Protein eva-1 homolog A                                                                       | EVA1A  | 102     | S | 0.939 | 90.86 | NaN  | NaN  | 1.06 | NaN  | NaN  | NaN  | 1.73 | NaN  | 1.97 |
| B8ZZI9 | Aftiphilin                                                                                    | AFTPH  | 37      | S | 0.997 | 70.96 | 1.16 | NaN  | 1.43 | NaN  | NaN  | NaN  | 1.22 | 1.23 | 1.13 |
| C9J2I0 | Arf-GAP domain and FG repeat-containing protein 1                                             | AGFG1  | 103     | S | 0.995 | 65.63 | 2.93 | 1.78 | NaN  | 1.64 | 1.71 | 1.30 | 1.87 | 1.75 | NaN  |
| B9ZVT1 | RNA-binding protein 12B                                                                       | RBM12B | 575     | S | 1     | 53.45 | 0.69 | 0.59 | NaN  | 0.72 | 0.73 | NaN  | NaN  | 0.87 | NaN  |
| B9ZVT1 | RNA-binding protein 12B                                                                       | RBM12B | 719     | S | 0.998 | 42.94 | NaN  | NaN  | NaN  | NaN  | NaN  | NaN  | 0.99 | 1.00 | 0.98 |
| C9JWF0 | Structural maintenance of chromosomes protein 4;Structural maintenance of chromosomes protein | SMC4   | 22      | S | 1     | 190.4 | 1.20 | 1.10 | 0.84 | 0.96 | 0.83 | 0.84 | 1.17 | 1.18 | 0.90 |
| C9JWF0 | Structural maintenance of chromosomes protein 4;Structural maintenance of chromosomes protein | SMC4   | 27      | S | 0.914 | 190.4 | 0.86 | NaN  | NaN  | 1.11 | 1.20 | 0.96 | 0.68 | NaN  | 0.82 |
| C9JWF0 | Structural maintenance of chromosomes protein 4;Structural maintenance of chromosomes protein | SMC4   | 28      | S | 0.841 | 159.5 | NaN  | 1.10 | 1.03 | NaN  | NaN  | 0.97 | NaN  | NaN  | NaN  |
| C9JWF0 | Structural maintenance of chromosomes protein 4                                               | SMC4   | 41      | S | 0.982 | 220.5 | NaN  | 1.10 | NaN  | 0.97 | NaN  | 0.97 | NaN  | 1.27 | NaN  |
| C9JIY9 | Nucleoporin NUP53                                                                             | NUP35  | 49      | S | 0.727 | 55.01 | 0.88 | 0.89 | NaN  | 1.61 | 1.49 | NaN  | NaN  | NaN  | NaN  |
| H7C559 | Serine/threonine-protein phosphatase 4 regulatory subunit 2                                   | PPP4R2 | 58      | S | 0.98  | 75.53 | 0.65 | 0.70 | 1.00 | 1.23 | 1.67 | 0.99 | 0.59 | 0.66 | NaN  |
| C9J3R1 | Zinc finger protein 639                                                                       | ZNF639 | 60      | S | 0.995 | 96.53 | NaN  | NaN  | 0.98 | 1.39 | 1.25 | 0.95 | NaN  | 1.01 | NaN  |
| C9J0A7 | Charged multivesicular body protein 2b                                                        | CHMP2B | 169     | S | 1     | 135   | 1.05 | 1.13 | 1.12 | 1.00 | 1.11 | 1.04 | 1.17 | 1.01 | 1.12 |
| C9J0I9 | Nuclear-interacting partner of ALK                                                            | ZC3HC1 | 24      | S | 0.999 | 127.4 | 0.62 | 0.75 | NaN  | 1.28 | NaN  | NaN  | 0.91 | 0.74 | NaN  |
| C9J0I9 | Nuclear-interacting partner of ALK                                                            | ZC3HC1 | 351     | S | 0.5   | 162.4 | NaN  | 0.98 | NaN  | 1.62 | 1.64 | NaN  | NaN  | 0.84 | NaN  |
| C9J0I9 | Nuclear-interacting partner of ALK                                                            | ZC3HC1 | 352     | S | 0.932 | 162.8 | 1.01 | 1.03 | 0.87 | 1.32 | 1.34 | 1.12 | 0.76 | 0.84 | 0.78 |
| C9J0I9 | Nuclear-interacting partner of ALK                                                            | ZC3HC1 | 292     | S | 0.98  | 77.73 | 1.26 | 0.94 | NaN  | NaN  | 1.17 | NaN  | NaN  | NaN  | NaN  |

|        |                                                           |          |     |   |       |       |      |      |      |      |      |      |      |      |      |
|--------|-----------------------------------------------------------|----------|-----|---|-------|-------|------|------|------|------|------|------|------|------|------|
| C9J0I9 | Nuclear-interacting partner of ALK                        | ZC3HC1   | 295 | S | 0.591 | 97.35 | 1.26 | 1.28 | NaN  | NaN  | 1.17 | NaN  | NaN  | NaN  | NaN  |
| C9J0I9 | Nuclear-interacting partner of ALK                        | ZC3HC1   | 301 | S | 0.98  | 153.9 | 1.56 | NaN  | NaN  | 1.41 | 1.32 | NaN  | 1.25 | 1.18 | NaN  |
| C9J0I9 | Nuclear-interacting partner of ALK                        | ZC3HC1   | 316 | S | 0.771 | 89.98 | 1.04 | 1.31 | NaN  | 0.94 | NaN  | 1.08 | NaN  | NaN  | NaN  |
| C9J1H7 | Nucleolin                                                 | NCL      | 51  | S | 0.998 | 114.9 | 0.87 | 0.89 | 0.85 | 1.26 | 1.29 | 1.28 | 0.57 | 0.55 | 0.54 |
| F5H5B7 | Cleavage and polyadenylation specificity factor subunit 7 | CPSF7    | 60  | S | 1     | 56.95 | 1.13 | 1.19 | NaN  | NaN  | 1.26 | NaN  | 0.87 | NaN  | NaN  |
| C9J3F6 | TBC1 domain family member                                 | TBC1D5   | 528 | S | 0.981 | 77.66 | 0.96 | 1.01 | 1.12 | NaN  | 1.12 | 1.02 | 0.87 | 1.02 | 0.81 |
| M0R1Q8 | Regulator of chromosome condensation                      | RCC1     | 113 | S | 1     | 122.7 | 0.79 | 0.84 | 0.82 | 0.87 | 0.87 | 0.89 | 0.89 | 0.92 | 0.95 |
| C9J4C4 | Folliculin                                                | FLCN     | 9   | S | 0.998 | 90.26 | 0.85 | 0.76 | 0.80 | 0.73 | 0.61 | 0.70 | 0.84 | 0.88 | 0.68 |
| C9J4K0 | Ashwin                                                    | C2orf49  | 151 | S | 0.95  | 51.52 | NaN  | NaN  | 2.49 | NaN  | 2.66 | 2.43 | 0.89 | 1.00 | 1.24 |
| C9J542 | PDZ and LIM domain protein 4                              | PDLIM4   | 53  | S | 0.98  | 183.8 | 2.29 | 2.41 | 2.24 | 0.97 | 1.06 | 0.93 | 2.76 | 2.83 | 2.87 |
| E9PNJ7 | Nucleosome assembly protein 1-like 4                      | NAP1L4   | 125 | S | 1     | 457.2 | 0.87 | 0.88 | 0.89 | 0.94 | 0.96 | 0.98 | 0.75 | 0.77 | 0.81 |
| C9JM54 | Chromobox protein homolog 8                               | CBX8     | 165 | S | 0.702 | 72.8  | 0.46 | 0.45 | 0.56 | 0.59 | 0.88 | 0.78 | NaN  | 0.56 | 0.57 |
| C9JM54 | Chromobox protein homolog 8                               | CBX8     | 166 | S | 0.565 | 49.17 | NaN  | NaN  | NaN  | NaN  | NaN  | NaN  | 0.54 | NaN  | 0.31 |
| C9J6P4 | Zinc finger CCCH-type antiviral protein 1                 | ZC3HAV1  | 284 | S | 1     | 113.3 | 1.44 | 1.23 | NaN  | 1.39 | NaN  | NaN  | 0.97 | NaN  | 1.16 |
| C9J6P4 | Zinc finger CCCH-type antiviral protein 1                 | ZC3HAV1  | 275 | S | 1     | 94.02 | NaN  | 1.15 | NaN  | 1.16 | NaN  | 0.80 | NaN  | NaN  | NaN  |
| C9J813 |                                                           | CALD1    | 202 | S | 1     | 104.3 | 0.99 | 1.01 | 1.02 | 1.12 | NaN  | 1.09 | 1.34 | 1.20 | 1.42 |
| C9J9H5 | Mitotic spindle assembly checkpoint protein MAD1          | MAD1L1   | 18  | S | 0.668 | 53.21 | 0.75 | 0.65 | NaN  | NaN  | NaN  | NaN  | NaN  | NaN  | NaN  |
| C9J9W2 | LIM and SH3 domain protein 1                              | LASP1    | 110 | S | 1     | 190.2 | 1.48 | 1.18 | 1.17 | 2.29 | 2.25 | 2.30 | NaN  | 0.65 | 1.68 |
| C9JA69 | HMG box transcription factor BBX                          | BBX      | 794 | S | 0.996 | 84.94 | 0.57 | 0.46 | 0.55 | 0.54 | 0.69 | 0.58 | 1.14 | 1.18 | NaN  |
| C9JA93 |                                                           | TBC1D15  | 106 | S | 0.973 | 168.6 | 0.97 | 1.00 | 0.86 | 0.81 | 0.87 | 0.66 | 1.02 | NaN  | 1.02 |
| C9JAE6 | Multidrug and toxin extrusion protein 2                   | SLC47A2  | 338 | S | 0.885 | 45.86 | NaN  | NaN  | NaN  | 0.80 | 0.74 | NaN  | NaN  | 0.53 | NaN  |
| C9JAE6 | Multidrug and toxin extrusion protein 2                   | SLC47A2  | 343 | S | 0.824 | 45.86 | NaN  | NaN  | NaN  | 0.80 | 0.74 | NaN  | NaN  | 0.53 | NaN  |
| C9JL19 | 60 kDa heat shock protein, mitochondrial                  | HSPD1    | 70  | S | 0.985 | 150.1 | 2.79 | 2.85 | 2.26 | 1.77 | NaN  | NaN  | NaN  | 1.73 | NaN  |
| C9JED2 | SH3 domain-binding protein 4                              | SH3BP4   | 131 | S | 1     | 102.6 | 1.15 | 1.15 | 1.16 | 1.72 | 1.57 | 1.49 | 0.55 | 0.58 | 0.78 |
| C9JEZ4 | Cdc42 effector protein 3                                  | CDC42EP3 | 100 | S | 0.999 | 298.8 | 5.12 | 5.23 | 6.80 | 5.84 | NaN  | 5.74 | 1.91 | 1.45 | 1.99 |
| E7EV54 | Proline-, glutamic acid- and leucine-rich protein 1       | PELP1    | 819 | S | 1     | 86.51 | 0.81 | NaN  | NaN  | NaN  | NaN  | NaN  | 0.92 | NaN  | 1.11 |
| E7EV54 | Proline-, glutamic acid- and leucine-rich protein 1       | PELP1    | 334 | S | 1     | 156.1 | 0.82 | 0.82 | 0.70 | 0.88 | 0.94 | 0.87 | 0.85 | 0.95 | 0.86 |
| C9JHG2 | Raftlin                                                   | RFTN1    | 220 | S | 0.999 | 60.47 | 2.93 | 2.79 | 3.55 | NaN  | NaN  | 1.74 | NaN  | 1.34 | NaN  |
| C9JI87 | Voltage-dependent anion-selective channel protein 1       | VDAC1    | 104 | S | 0.997 | 138.7 | 0.85 | 0.81 | 0.95 | 1.08 | 1.08 | 1.04 | 1.07 | NaN  | 1.07 |

|        |                                                                                                 |           |      |   |       |       |      |      |      |      |      |      |      |      |      |
|--------|-------------------------------------------------------------------------------------------------|-----------|------|---|-------|-------|------|------|------|------|------|------|------|------|------|
| C9JIG9 | Serine/threonine-protein kinase OSR1                                                            | OXSR1     | 339  | S | 1     | 308.4 | 1.13 | NaN  | 1.06 | NaN  | 2.39 | 1.00 | 0.79 | NaN  | 0.94 |
| C9JIG9 | Serine/threonine-protein kinase OSR1                                                            | OXSR1     | 427  | S | 0.853 | 154.3 | NaN  | NaN  | NaN  | 1.62 | 1.78 | 1.53 | NaN  | NaN  | NaN  |
| C9JKH7 | Fibronectin type III domain-containing protein 3B                                               | FNDC3B    | 181  | S | 0.995 | 84.82 | 2.04 | 1.84 | 1.97 | 1.14 | 1.06 | 1.00 | 1.87 | 1.96 | 1.98 |
| C9JKL2 | MLN64 N-terminal domain homolog                                                                 | STARD3NL  | 192  | S | 0.973 | 180.2 | 0.72 | 0.60 | 0.64 | 0.66 | NaN  | 0.63 | 0.81 | NaN  | 0.96 |
| C9JKL2 | MLN64 N-terminal domain homolog                                                                 | STARD3NL  | 200  | S | 1     | 180.2 | 0.64 | 0.60 | 0.64 | 0.75 | NaN  | 0.56 | 0.81 | NaN  | 0.72 |
| I3L3A7 | Protein FAM195B                                                                                 | FAM195B   | 21   | S | 0.993 | 98.93 | 0.99 | 0.98 | 1.16 | 1.03 | 1.01 | NaN  | 1.25 | NaN  | 1.14 |
| C9JN71 | Zinc finger protein 878                                                                         | ZNF878    | 209  | S | 0.92  | 62.24 | NaN  | NaN  | 0.55 | 1.02 | 0.67 | 0.53 | 0.62 | 0.90 | 0.67 |
| C9JNP9 | Ubiquitin fusion degradation protein 1 homolog                                                  | UFD1L     | 151  | S | 0.804 | 67.58 | 1.70 | 1.51 | 1.47 | 2.53 | 2.73 | 2.65 | 0.93 | NaN  | 1.37 |
| F8WBS8 | 26S proteasome non-ATPase regulatory subunit 2                                                  | PSMD2     | 16   | S | 1     | 174.9 | 1.21 | 1.28 | 1.18 | 1.65 | 1.73 | 1.81 | 0.96 | 0.96 | 0.99 |
| C9JRJ5 | LIM domain-containing protein                                                                   | LIMD1     | 384  | S | 0.982 | 90.69 | NaN  | 0.85 | NaN  | 0.91 | 1.03 | NaN  | NaN  | 0.67 | NaN  |
| C9JRM9 | Zinc finger protein with KRAB and SCAN domains 1                                                | ZKSCAN1   | 13   | S | 1     | 82.53 | NaN  | NaN  | NaN  | NaN  | NaN  | NaN  | 0.43 | NaN  | 1.03 |
| C9JWC4 | Holliday junction recognition protein                                                           | HJURP     | 388  | S | 1     | 81.59 | 1.39 | 1.16 | NaN  | NaN  | NaN  | NaN  | NaN  | NaN  | NaN  |
| C9JZG1 | Eukaryotic translation initiation factor 3 subunit B                                            | EIF3B     | 115  | S | 1     | 287.9 | 1.07 | 1.09 | 1.09 | 1.06 | 1.00 | 0.97 | 1.06 | 1.05 | 1.08 |
| C9JZG1 | Eukaryotic translation initiation factor 3 subunit B                                            | EIF3B     | 125  | S | 1     | 287.9 | 1.09 | 1.09 | 1.09 | 1.01 | 0.91 | 0.97 | 1.15 | 1.16 | 1.15 |
| C9JZW3 | Elongation factor 1-beta                                                                        | EEF1B2    | 106  | S | 1     | 478.2 | 1.13 | 1.07 | 1.09 | 1.05 | 0.92 | 1.08 | NaN  | 1.06 | 1.29 |
| C9K0J5 | Ras-associated and pleckstrin homology domains-containing protein 1                             | RAPH1     | 1206 | S | 0.736 | 98.99 | 1.61 | NaN  | 1.67 | 2.12 | 1.83 | 1.85 | NaN  | 0.98 | NaN  |
| C9K0J5 | Ras-associated and pleckstrin homology domains-containing protein 1                             | RAPH1     | 662  | S | 1     | 56.95 | 2.73 | 2.01 | NaN  | 2.71 | NaN  | NaN  | NaN  | NaN  | NaN  |
| C9K0K7 | Phosphoribosyl pyrophosphate synthase-40S ribosomal protein S3a                                 | PRPSAP2   | 227  | S | 0.999 | 183.9 | NaN  | 0.67 | 0.89 | 0.74 | 0.79 | NaN  | 0.70 | 0.78 | NaN  |
| D6R9B6 | Cyclin-dependent kinase 7                                                                       | RPS3A     | 144  | S | 1     | 66.49 | NaN  | 1.47 | 1.49 | 1.45 | 1.75 | 1.60 | 1.02 | 0.99 | 0.93 |
| D6REC6 | RNA-binding protein 4                                                                           | CDK7      | 71   | S | 1     | 86.87 | 0.54 | NaN  | 0.49 | 0.56 | 0.56 | 0.55 | NaN  | 0.90 | 0.83 |
| D6R9K7 | Heterogeneous nuclear ribonucleoprotein D0                                                      | RBM4      | 86   | S | 0.963 | 100.2 | NaN  | NaN  | 1.66 | 1.58 | 1.69 | NaN  | NaN  | NaN  | NaN  |
| D6RAF8 | Heterogeneous nuclear ribonucleoprotein D0                                                      | HNRNPD    | 80   | S | 1     | 100.8 | 0.71 | 0.79 | 0.72 | 0.76 | NaN  | NaN  | NaN  | NaN  | NaN  |
| D6RAF8 | Heterogeneous nuclear ribonucleoprotein D0                                                      | HNRNPD    | 82   | S | 0.792 | 319.9 | NaN  | 0.82 | 0.81 | 0.76 | 0.90 | NaN  | NaN  | NaN  | NaN  |
| D6RAF8 | Heterogeneous nuclear ribonucleoprotein D0                                                      | HNRNPD    | 83   | S | 0.996 | 362.1 | 0.76 | 0.79 | 0.76 | 0.88 | 0.91 | 0.87 | 0.91 | 0.91 | 0.93 |
| D6RAY8 | SWI/SNF-related matrix-associated actin-dependent regulator of chromatin subfamily A containing | SMARCA D1 | 211  | S | 0.989 | 87.74 | 1.09 | 1.19 | NaN  | 1.92 | 1.24 | NaN  | NaN  | 3.22 | NaN  |



|        |                                                                                                                                                                                                 |           |      |   |       |       |      |      |      |      |      |      |      |      |      |
|--------|-------------------------------------------------------------------------------------------------------------------------------------------------------------------------------------------------|-----------|------|---|-------|-------|------|------|------|------|------|------|------|------|------|
| D6RAY8 | SWI/SNF-related matrix-associated actin-dependent regulator of chromatin subfamily A containing SWI/SNF-related matrix-associated actin-dependent regulator of chromatin subfamily A containing | SMARCA D1 | 212  | S | 0.989 | 87.74 | 1.09 | 1.19 | NaN  | 1.92 | 1.24 | NaN  | NaN  | 3.22 | NaN  |
| D6RAY8 | SWI/SNF-related matrix-associated actin-dependent regulator of chromatin subfamily A containing                                                                                                 | SMARCA D1 | 214  | S | 0.826 | 87.74 | 1.09 | 1.19 | NaN  | 1.92 | 1.24 | NaN  | NaN  | 3.22 | NaN  |
| D6RB55 | Amyloid beta A4 precursor protein-binding family B member 2                                                                                                                                     | APBB2     | 106  | S | 0.985 | 43.52 | NaN  | 0.90 | NaN  | 1.03 | 1.18 | NaN  | NaN  | NaN  | NaN  |
| H7BXG7 | Protein transport protein Sec31A                                                                                                                                                                | SEC31A    | 532  | S | 1     | 153.9 | 1.95 | 1.84 | 2.06 | 1.59 | 1.48 | 1.60 | 1.98 | 2.09 | 1.76 |
| H7BXG7 | Protein transport protein Sec31A                                                                                                                                                                | SEC31A    | 912  | S | 0.998 | 161   | 1.47 | 1.38 | 1.24 | 1.50 | 1.29 | 1.51 | 1.11 | 1.01 | NaN  |
| E3W994 | CLIP-associating protein 2                                                                                                                                                                      | CLASP2    | 575  | S | 0.984 | 146.7 | 2.35 | 1.68 | NaN  | NaN  | NaN  | NaN  | 2.41 | 1.45 | NaN  |
| E5RHJ2 | Aspartyl/asparaginyl beta-hydroxylase                                                                                                                                                           | ASPH      | 29   | S | 0.827 | 104.8 | 0.87 | NaN  | 1.04 | NaN  | NaN  | 1.21 | 0.70 | NaN  | 0.68 |
| E5RGC1 | F-box/WD repeat-containing protein 11                                                                                                                                                           | FBXW11    | 5    | S | 0.995 | 46.62 | NaN  | NaN  | 0.69 | 0.78 | 0.74 | NaN  | 1.00 | 0.87 | NaN  |
| E5RGC1 | F-box/WD repeat-containing protein 11                                                                                                                                                           | FBXW11    | 17   | S | 0.991 | 46.62 | NaN  | NaN  | 0.69 | 0.78 | 0.74 | NaN  | 1.00 | 0.87 | NaN  |
| E5RHA3 | Glutamate-rich protein 1                                                                                                                                                                        | ERICH1    | 144  | S | 1     | 137.2 | 0.71 | 0.84 | 0.75 | 0.82 | 1.15 | NaN  | NaN  | NaN  | 1.21 |
| E5RJU9 | Protein LYRIC                                                                                                                                                                                   | MTDH      | 370  | S | 1     | 234.8 | 0.70 | 0.88 | 7.83 | 0.81 | 0.78 | 0.85 | 0.99 | 1.00 | 1.01 |
| E7EMD6 | A-kinase anchor protein 10, mitochondrial                                                                                                                                                       | AKAP10    | 187  | S | 0.981 | 134   | 0.97 | 0.89 | 1.12 | 1.11 | 0.97 | 1.14 | 1.02 | NaN  | NaN  |
| E7EMN6 | Protein phosphatase inhibitor 2-like protein 3;Protein phosphatase inhibitor 2                                                                                                                  | PPP1R2    | 95   | S | 1     | 235.1 | 0.85 | 0.89 | 0.54 | 0.60 | 0.52 | NaN  | 1.03 | 0.77 | 1.08 |
| E7EMN6 | Protein phosphatase inhibitor 2-like protein 3;Protein phosphatase inhibitor 2                                                                                                                  | PPP1R2    | 96   | S | 1     | 235.1 | 0.85 | 0.62 | 0.54 | NaN  | NaN  | NaN  | 1.10 | 1.06 | 1.08 |
| E7EMW7 | E3 ubiquitin-protein ligase UBR5                                                                                                                                                                | UBR5      | 446  | S | 0.992 | 51.82 | 0.59 | NaN  | NaN  | 1.00 | 1.06 | NaN  | NaN  | NaN  | NaN  |
| E7EMW7 | E3 ubiquitin-protein ligase UBR5                                                                                                                                                                | UBR5      | 447  | S | 0.999 | 51.82 | 0.59 | NaN  | NaN  | 1.00 | 1.06 | NaN  | NaN  | NaN  | NaN  |
| E7EMW7 | E3 ubiquitin-protein ligase UBR5                                                                                                                                                                | UBR5      | 450  | S | 1     | 51.82 | 0.59 | NaN  | NaN  | 1.00 | 1.06 | NaN  | NaN  | NaN  | NaN  |
| E7EMZ9 | Transforming acidic coiled-coil-containing protein 2                                                                                                                                            | TACC2     | 2467 | S | 0.967 | 128.1 | 0.86 | NaN  | 1.14 | 0.94 | NaN  | 1.07 | 1.33 | NaN  | 1.50 |
| E7EMZ9 | Transforming acidic coiled-coil-containing protein 2                                                                                                                                            | TACC2     | 2272 | S | 0.994 | 76.51 | 1.45 | 1.48 | 1.13 | 1.35 | 1.44 | 1.37 | 1.25 | 0.40 | 1.26 |
| E7EMZ9 | Transforming acidic coiled-coil-containing protein 2                                                                                                                                            | TACC2     | 2276 | S | 1     | 77.07 | 1.45 | 1.48 | 1.20 | 1.35 | 1.44 | 1.30 | 1.25 | 1.33 | 1.26 |
| E7EMZ9 | Transforming acidic coiled-coil-containing protein 2                                                                                                                                            | TACC2     | 2524 | S | 0.748 | 190.7 | 0.98 | 0.96 | NaN  | NaN  | NaN  | 1.18 | 0.86 | NaN  | NaN  |
| E7EN95 | Filamin-B                                                                                                                                                                                       | FLNB      | 1914 | S | 1     | 113.5 | 3.26 | 2.66 | 2.77 | 3.36 | NaN  | 3.83 | 1.03 | 0.86 | 0.83 |

|        |                                                         |          |      |   |       |       |      |      |       |       |       |       |      |      |      |
|--------|---------------------------------------------------------|----------|------|---|-------|-------|------|------|-------|-------|-------|-------|------|------|------|
| E7EN95 | Filamin-B                                               | FLNB     | 814  | S | 0.999 | 163.5 | 9.87 | 8.62 | 10.61 | 16.86 | 16.68 | 15.30 | 1.01 | 0.80 | 0.98 |
| E7EN95 | Filamin-B                                               | FLNB     | 2285 | S | 1     | 204.5 | 0.70 | 0.73 | 0.75  | 0.98  | 1.01  | 1.00  | 0.74 | 0.76 | 0.76 |
| E7EN95 | Filamin-B                                               | FLNB     | 2288 | S | 0.571 | 63.18 | 0.70 | 0.76 | 0.88  | 1.09  | NaN   | 1.08  | NaN  | NaN  | NaN  |
| E7EN95 | Filamin-B                                               | FLNB     | 1336 | S | 1     | 130.3 | 3.02 | 3.10 | 2.59  | 3.60  | 3.92  | 3.46  | 1.20 | 1.36 | 1.13 |
| F5H3K2 | Uncharacterized protein C12orf43                        | C12orf43 | 134  | S | 0.926 | 98.19 | 1.23 | 1.27 | NaN   | 1.29  | NaN   | 0.85  | 1.19 | 1.44 | NaN  |
| F5H3K2 | Uncharacterized protein C12orf43                        | C12orf43 | 92   | S | 1     | 41.6  | NaN  | NaN  | NaN   | 0.59  | NaN   | NaN   | 0.89 | 0.72 | NaN  |
| E7EV99 | Alpha-adducin                                           | ADD1     | 12   | S | 0.98  | 90.85 | NaN  | 2.66 | NaN   | 3.03  | 2.74  | NaN   | NaN  | 0.76 | NaN  |
| E7EV99 | Alpha-adducin                                           | ADD1     | 358  | S | 1     | 244   | 0.87 | 1.00 | 0.84  | 0.77  | 0.83  | 0.86  | 0.97 | 0.97 | 0.91 |
| E7EPJ7 | Triple functional domain                                | TRIO     | 2188 | S | 0.999 | 59.47 | 0.79 | 0.88 | NaN   | NaN   | 0.78  | 1.78  | 1.15 | 0.99 | 1.40 |
| E7EPJ7 | Triple functional domain                                | TRIO     | 2192 | S | 0.987 | 42.92 | 1.87 | 1.51 | NaN   | NaN   | 2.11  | 1.64  | 2.58 | 2.31 | 1.29 |
| E7EPJ7 | Triple functional domain                                | TRIO     | 2162 | S | 0.774 | 48.9  | NaN  | 0.69 | 0.84  | NaN   | NaN   | NaN   | 1.07 | 1.18 | 0.91 |
| E7EPK0 | LIM and calponin homology domains-containing protein 1  | LIMCH1   | 511  | S | 0.999 | 164   | NaN  | 0.64 | NaN   | 1.03  | NaN   | 0.81  | 0.71 | 0.82 | 0.88 |
| E7EPK0 | LIM and calponin homology domains-containing protein 1  | LIMCH1   | 522  | S | 0.728 | 64.38 | NaN  | NaN  | NaN   | NaN   | NaN   | NaN   | 1.08 | 1.16 | NaN  |
| E7EPK0 | LIM and calponin homology domains-containing protein 1  | LIMCH1   | 84   | S | 0.956 | 85.81 | 0.80 | 0.70 | 0.72  | 0.85  | 0.84  | 0.82  | NaN  | NaN  | NaN  |
| E7EPK0 | LIM and calponin homology domains-containing protein 1  | LIMCH1   | 70   | S | 1     | 80.51 | 0.70 | 0.86 | 1.03  | NaN   | 1.00  | 0.87  | NaN  | 1.03 | 1.01 |
| E7EPK0 | LIM and calponin homology domains-containing protein 1  | LIMCH1   | 813  | S | 1     | 162   | 1.48 | 1.44 | 1.45  | 1.35  | 1.36  | 1.31  | 2.24 | 2.16 | NaN  |
| E7EPK0 | LIM and calponin homology domains-containing protein 1  | LIMCH1   | 559  | S | 1     | 189.1 | 1.08 | 1.09 | 1.04  | 1.06  | 1.10  | 1.15  | 1.10 | 1.17 | 0.97 |
| E7EPK0 | LIM and calponin homology domains-containing protein 1  | LIMCH1   | 156  | S | 0.781 | 70.91 | 2.13 | 2.27 | NaN   | NaN   | NaN   | NaN   | NaN  | NaN  | NaN  |
| E7EPN9 | Protein PRRC2C                                          | PRRC2C   | 189  | S | 0.983 | 150.2 | NaN  | 1.44 | 1.03  | 2.07  | NaN   | NaN   | NaN  | NaN  | 0.75 |
| E7EPN9 | Protein PRRC2C                                          | PRRC2C   | 2107 | S | 1     | 121.8 | 1.13 | 0.99 | 1.00  | 1.43  | 1.57  | 1.27  | 0.71 | 0.72 | NaN  |
| E7EPN9 | Protein PRRC2C                                          | PRRC2C   | 880  | S | 0.834 | 63.72 | NaN  | NaN  | 1.83  | 1.59  | 2.15  | NaN   | 1.82 | 1.65 | NaN  |
| E9PGG1 |                                                         | DYNC112  | 81   | S | 0.768 | 146.5 | 0.82 | 0.89 | 0.83  | 1.37  | 1.35  | 1.33  | 0.54 | 0.58 | 0.52 |
| S4R3H4 | Apoptotic chromatin condensation inducer in the nucleus | ACIN1    | 432  | S | 1     | 221.6 | 0.67 | 0.68 | 0.66  | 0.67  | 0.74  | 0.72  | 1.18 | 1.17 | 1.18 |
| S4R3H4 | Apoptotic chromatin condensation inducer in the nucleus | ACIN1    | 352  | S | 0.952 | 112.6 | NaN  | 0.97 | 1.00  | 1.07  | 1.19  | 1.14  | NaN  | 1.11 | 0.97 |
| S4R3H4 | Apoptotic chromatin condensation inducer in the nucleus | ACIN1    | 671  | S | 1     | 84.9  | 0.79 | NaN  | 0.93  | 0.94  | NaN   | 0.92  | 0.95 | NaN  | 1.04 |
| S4R3H4 | Apoptotic chromatin condensation inducer in the nucleus | ACIN1    | 652  | S | 1     | 78.53 | 1.70 | 1.79 | 1.62  | 1.45  | 1.38  | 0.83  | 1.56 | 1.42 | 2.03 |
| S4R3H4 | Apoptotic chromatin condensation inducer in the nucleus | ACIN1    | 326  | S | 0.968 | 45.09 | NaN  | NaN  | NaN   | 0.73  | 0.79  | NaN   | NaN  | NaN  | 0.80 |





|        |                                                                                                                                                                                                                                                                                                                                                           |         |         |   |       |       |      |      |      |      |      |      |      |      |      |
|--------|-----------------------------------------------------------------------------------------------------------------------------------------------------------------------------------------------------------------------------------------------------------------------------------------------------------------------------------------------------------|---------|---------|---|-------|-------|------|------|------|------|------|------|------|------|------|
| F8VZJ2 | Nascent polypeptide-associated complex subunit alpha;Nascent polypeptide-associated complex subunit alpha muscle-specific form                                                                                                                                                                                                                            | NACA    | 87      | S | 1     | 301.7 | 1.15 | 1.04 | 1.03 | 1.05 | 1.04 | 1.01 | 1.08 | 1.06 | 1.00 |
| E9PCY7 | Heterogeneous nuclear ribonucleoprotein H;Heterogeneous nuclear ribonucleoprotein H, N-terminally processed;Heterogeneous nuclear ribonucleoprotein F;Heterogeneous nuclear ribonucleoprotein F, N-Heterogeneous nuclear ribonucleoprotein H;Heterogeneous nuclear ribonucleoprotein H, N-terminally processed;Heterogeneous nuclear ribonucleoprotein H2 | HNRNPH1 | 310     | S | 1     | 81.88 | NaN  | 1.60 | NaN  | 1.99 | 1.67 | NaN  | NaN  | NaN  | NaN  |
| E9PCY7 | Heterogeneous nuclear ribonucleoprotein H, N-terminally processed;Heterogeneous nuclear ribonucleoprotein H2                                                                                                                                                                                                                                              | HNRNPH1 | 104;104 | S | 1     | 235.3 | 1.69 | 1.76 | 1.68 | 2.03 | 2.08 | 2.03 | 1.05 | 1.03 | 0.98 |
| H0YF64 | Calcipressin-3;Calcipressin-1                                                                                                                                                                                                                                                                                                                             | RCAN3   | 15      | S | 1     | 81.35 | 0.52 | 0.62 | 0.59 | NaN  | 0.54 | 0.63 | 0.78 | 0.70 | 0.76 |
| H0YF64 | Calcipressin-3;Calcipressin-1                                                                                                                                                                                                                                                                                                                             | RCAN3   | 19      | S | 1     | 81.35 | 0.72 | 0.99 | 0.59 | NaN  | 0.54 | 0.63 | 0.78 | 0.70 | 0.77 |
| E9PER6 | Putative 3-phosphoinositide-dependent protein kinase 2;3-phosphoinositide-dependent protein kinase 1                                                                                                                                                                                                                                                      | PDPK1   | 214     | S | 0.822 | 49.19 | 0.88 | 1.06 | NaN  | 1.05 | 2.65 | NaN  | 2.30 | 1.45 | NaN  |
| E9PF10 | Nuclear pore complex protein Nup155                                                                                                                                                                                                                                                                                                                       | NUP155  | 928     | S | 0.989 | 125.4 | 1.49 | 1.61 | 1.57 | 1.54 | 1.59 | 1.51 | 1.23 | 1.28 | 1.27 |
| E9PFP1 | Phosphatidylinositol 3-kinase regulatory subunit beta                                                                                                                                                                                                                                                                                                     | PIK3R2  | 262     | S | 0.537 | 85.2  | NaN  | 0.94 | 0.93 | 1.05 | 1.00 | 1.00 | 1.09 | NaN  | 1.01 |
| E9PFP1 | Phosphatidylinositol 3-kinase regulatory subunit beta                                                                                                                                                                                                                                                                                                     | PIK3R2  | 263     | S | 0.5   | 85.2  | NaN  | NaN  | 0.93 | 1.05 | 1.00 | NaN  | NaN  | NaN  | NaN  |
| G5E9V3 | Pleckstrin homology-like domain family B member 2                                                                                                                                                                                                                                                                                                         | PHLDB2  | 489     | S | 1     | 152.2 | 0.69 | 0.81 | 0.78 | 0.78 | 0.64 | 0.88 | 0.80 | NaN  | 0.86 |
| G5E9V3 | Pleckstrin homology-like domain family B member 2                                                                                                                                                                                                                                                                                                         | PHLDB2  | 204     | S | 0.96  | 184.3 | 1.53 | 1.48 | 1.33 | 1.62 | 1.51 | 1.29 | 1.62 | NaN  | 1.84 |
| E9PFQ8 | Serine/threonine-protein kinase RIO1                                                                                                                                                                                                                                                                                                                      | RIOK1   | 21      | S | 0.708 | 134.2 | 1.07 | NaN  | 1.13 | 0.97 | NaN  | 0.89 | 1.34 | NaN  | NaN  |
| E9PFQ8 | Serine/threonine-protein kinase RIO1                                                                                                                                                                                                                                                                                                                      | RIOK1   | 22      | S | 0.742 | 167.1 | NaN  | 0.87 | 0.75 | NaN  | 1.19 | 0.88 | NaN  | 1.43 | 1.26 |
| E9PG73 | Peptidyl-prolyl cis-trans isomerase G                                                                                                                                                                                                                                                                                                                     | PPIG    | 672     | S | 0.999 | 106.2 | 1.25 | NaN  | NaN  | 0.91 | 0.98 | NaN  | 1.07 | 1.08 | 1.12 |
| E9PG73 | Peptidyl-prolyl cis-trans isomerase G                                                                                                                                                                                                                                                                                                                     | PPIG    | 702     | S | 0.909 | 84.84 | NaN  | 0.90 | NaN  | 1.04 | 1.01 | 1.01 | 1.07 | 0.91 | NaN  |

|        |                                                   |          |     |   |       |       |      |      |      |      |      |      |      |      |      |
|--------|---------------------------------------------------|----------|-----|---|-------|-------|------|------|------|------|------|------|------|------|------|
| E9PG73 | Peptidyl-prolyl cis-trans isomerase G             | PPIG     | 275 | S | 1     | 55.26 | NaN  | NaN  | 0.76 | 0.96 | 0.88 | NaN  | 0.72 | NaN  | NaN  |
| E9PG73 | Peptidyl-prolyl cis-trans isomerase G             | PPIG     | 239 | S | 0.917 | 128.6 | 1.15 | 1.15 | 1.11 | 1.08 | NaN  | 1.03 | NaN  | 1.16 | 1.36 |
| E9PG73 | Peptidyl-prolyl cis-trans isomerase G             | PPIG     | 241 | S | 0.997 | 128.6 | 1.15 | 1.15 | 1.11 | 1.08 | NaN  | 1.03 | NaN  | 1.16 | 1.36 |
| E9PG73 | Peptidyl-prolyl cis-trans isomerase G             | PPIG     | 242 | S | 0.999 | 128.6 | 1.15 | 1.15 | 1.11 | 1.08 | NaN  | 1.03 | NaN  | 1.16 | 1.36 |
| E9PG73 | Peptidyl-prolyl cis-trans isomerase G             | PPIG     | 244 | S | 1     | 128.6 | 1.15 | 1.15 | 1.11 | 1.08 | NaN  | 1.03 | NaN  | 1.16 | 1.36 |
| E9PGC0 | Ras GTPase-activating protein 1                   | RASA1    | 665 | S | 0.944 | 56.34 | NaN  | NaN  | NaN  | NaN  | 1.44 | 1.56 | NaN  | 0.96 | NaN  |
| E9PHI6 | Cytoplasmic dynein 1 light intermediate chain 1   | DYNC1LI1 | 91  | S | 1     | 265.6 | 1.14 | 1.15 | 1.23 | 1.23 | 1.25 | 1.18 | 0.95 | 1.00 | 1.01 |
| E9PHI6 | Cytoplasmic dynein 1 light intermediate chain 1   | DYNC1LI1 | 394 | S | 0.981 | 160.6 | 1.18 | 1.03 | 1.57 | 1.70 | 0.68 | 2.29 | NaN  | 0.93 | 0.82 |
| E9PHI6 | Cytoplasmic dynein 1 light intermediate chain 1   | DYNC1LI1 | 400 | S | 0.999 | 176.1 | 0.98 | 0.98 | 1.03 | 0.81 | 1.03 | 0.80 | 0.89 | 0.93 | 0.94 |
| E9PHI6 | Cytoplasmic dynein 1 light intermediate chain 1   | DYNC1LI1 | 305 | S | 1     | 231.6 | 1.55 | NaN  | NaN  | 5.06 | 5.31 | NaN  | NaN  | NaN  | NaN  |
| E9PHV6 | Nuclear autoantigen Sp-100                        | SP100    | 132 | S | 1     | 133.2 | 1.13 | 1.14 | NaN  | NaN  | 1.23 | 1.22 | 1.05 | 1.28 | 1.06 |
| E9PHV6 | Nuclear autoantigen Sp-100                        | SP100    | 426 | S | 0.647 | 77.69 | 0.90 | 1.33 | NaN  | 1.57 | 1.25 | NaN  | NaN  | NaN  | NaN  |
| E9PHV6 | Nuclear autoantigen Sp-100                        | SP100    | 427 | S | 0.648 | 77.69 | 0.90 | 1.33 | NaN  | 1.57 | 1.25 | NaN  | NaN  | NaN  | NaN  |
| E9PHV6 | Nuclear autoantigen Sp-100                        | SP100    | 428 | S | 0.65  | 77.69 | 0.90 | 1.33 | NaN  | 1.57 | 1.25 | NaN  | NaN  | NaN  | NaN  |
| E9PHV6 | Nuclear autoantigen Sp-100                        | SP100    | 382 | S | 1     | 130.5 | 0.27 | NaN  | NaN  | NaN  | 0.38 | NaN  | 1.07 | 0.86 | 0.82 |
| E9PHV6 | Nuclear autoantigen Sp-100                        | SP100    | 384 | S | 1     | 130.5 | 0.27 | NaN  | NaN  | NaN  | 0.38 | NaN  | 0.84 | 0.86 | 0.82 |
| E9PHV6 | Nuclear autoantigen Sp-100                        | SP100    | 385 | S | 1     | 130.5 | 0.27 | NaN  | NaN  | NaN  | 0.38 | NaN  | 0.84 | 0.86 | 0.82 |
| E9PHV6 | Nuclear autoantigen Sp-100                        | SP100    | 337 | S | 1     | 167.6 | 1.09 | 1.20 | 1.55 | 1.40 | NaN  | 1.62 | 1.02 | NaN  | 1.18 |
| E9PK52 | Band 4.1-like protein 2                           | EPB41L2  | 645 | S | 1     | 110.4 | NaN  | NaN  | 1.13 | 1.57 | 1.54 | 1.41 | 0.97 | 0.95 | NaN  |
| E9PK52 | Band 4.1-like protein 2                           | EPB41L2  | 38  | S | 0.762 | 190.1 | 1.07 | NaN  | 1.15 | 1.00 | 1.25 | 1.23 | NaN  | 1.43 | NaN  |
| E9PK52 | Band 4.1-like protein 2                           | EPB41L2  | 39  | S | 0.938 | 213.4 | NaN  | 1.18 | 1.05 | 0.99 | 1.27 | 1.23 | 0.87 | 1.10 | 1.20 |
| E9PK52 | Band 4.1-like protein 2                           | EPB41L2  | 598 | S | 0.868 | 80.98 | 1.72 | 1.77 | NaN  | 2.07 | 2.09 | 1.84 | NaN  | NaN  | 0.83 |
| E9PI52 | Arginine/serine-rich coiled-coil protein 2        | RSRC2    | 17  | S | 0.751 | 92.45 | 0.83 | 0.95 | 1.04 | 0.97 | 1.10 | 0.81 | NaN  | 0.88 | 1.41 |
| E9PI52 | Arginine/serine-rich coiled-coil protein 2        | RSRC2    | 32  | S | 0.999 | 159.6 | 1.18 | 1.19 | 1.23 | 1.23 | 1.32 | 1.07 | 0.99 | 0.96 | 0.82 |
| E9PIE3 | Protein kinase C delta-binding protein            | PRKCDBP  | 197 | S | 0.998 | 67.2  | 1.63 | 1.49 | 1.45 | 1.34 | NaN  | 1.33 | 1.66 | 1.61 | 1.72 |
| E9PIE3 | Protein kinase C delta-binding protein            | PRKCDBP  | 198 | S | 0.998 | 67.2  | 1.63 | 1.49 | 1.45 | 1.34 | NaN  | 1.33 | 1.66 | 1.61 | 1.72 |
| E9PJ04 | Splicing factor 3B subunit 2                      | SF3B2    | 300 | S | 0.761 | 67.19 | 1.20 | 1.21 | 1.26 | NaN  | 1.16 | NaN  | 1.04 | 1.43 | 1.38 |
| E9PJ04 | Splicing factor 3B subunit 2                      | SF3B2    | 301 | S | 0.775 | 67.19 | 1.20 | 1.21 | 1.26 | NaN  | 1.16 | NaN  | NaN  | 1.43 | 1.38 |
| E9PJ04 | Splicing factor 3B subunit 2                      | SF3B2    | 305 | S | 1     | 115.1 | 1.10 | 1.09 | 1.11 | 1.20 | 1.12 | 1.13 | 0.90 | 0.93 | 0.86 |
| E9PJ04 | Splicing factor 3B subunit 2                      | SF3B2    | 307 | S | 0.995 | 115.1 | 1.16 | 1.10 | 1.11 | 1.20 | 1.12 | 1.13 | 0.90 | 0.93 | 0.86 |
| E9PJ38 | Receptor-binding cancer antigen expressed on SiSo | EBAG9    | 36  | S | 1     | 107.7 | 0.84 | 0.88 | 0.82 | 0.86 | NaN  | 0.91 | 0.80 | 0.86 | 0.85 |

|        |                                                   |          |     |   |       |       |      |      |      |      |      |      |      |      |      |
|--------|---------------------------------------------------|----------|-----|---|-------|-------|------|------|------|------|------|------|------|------|------|
| E9PJ60 | Probable ATP-dependent RNA helicase DDX20         | DDX20    | 285 | S | 1     | 116.3 | 0.96 | 0.91 | 0.93 | 0.83 | 0.95 | 0.93 | 1.06 | 1.02 | 0.99 |
| E9PJ60 | Probable ATP-dependent RNA helicase DDX20         | DDX20    | 286 | S | 1     | 116.3 | 0.96 | 0.91 | 0.93 | 0.83 | 0.95 | 0.93 | 1.06 | 1.02 | 0.99 |
| E9PJF4 | Methylosome subunit pICln                         | CLNS1A   | 102 | S | 1     | 330   | 1.06 | 1.11 | 1.09 | 1.06 | 1.10 | 1.07 | 0.98 | 1.00 | 1.10 |
| E9PK91 | Bcl-2-associated transcription factor 1           | BCLAF1   | 177 | S | 1     | 193.6 | 0.99 | 0.93 | 0.84 | 0.97 | 1.01 | 0.96 | 0.91 | 0.81 | 1.01 |
| E9PK91 | Bcl-2-associated transcription factor 1           | BCLAF1   | 385 | S | 0.988 | 169.7 | 2.28 | 2.78 | NaN  | 1.71 | 1.29 | NaN  | 2.13 | 2.47 | 2.58 |
| E9PK91 | Bcl-2-associated transcription factor 1           | BCLAF1   | 512 | S | 1     | 158.6 | 0.89 | 0.88 | 0.90 | 0.94 | 0.92 | 0.96 | 0.93 | 0.93 | 1.00 |
| E9PK91 | Bcl-2-associated transcription factor 1           | BCLAF1   | 496 | S | 1     | 196.2 | 0.85 | 0.92 | 0.87 | 0.96 | 0.96 | 0.90 | 1.02 | 0.87 | 0.94 |
| E9PK91 | Bcl-2-associated transcription factor 1           | BCLAF1   | 397 | S | 1     | 338.7 | 1.06 | 1.07 | 1.09 | 1.02 | 1.03 | 0.97 | 1.14 | 1.21 | 1.04 |
| E9PK91 | Bcl-2-associated transcription factor 1           | BCLAF1   | 658 | S | 1     | 149.2 | 1.01 | 1.01 | 1.16 | 1.01 | 0.99 | 0.96 | 1.08 | 0.93 | 1.07 |
| E9PK91 | Bcl-2-associated transcription factor 1           | BCLAF1   | 268 | S | 0.999 | 181.6 | 1.06 | 1.07 | 1.00 | 1.03 | 0.99 | 0.93 | 0.88 | 0.97 | 0.92 |
| E9PK91 | Bcl-2-associated transcription factor 1           | BCLAF1   | 648 | S | 1     | 96.95 | 1.04 | 1.15 | 1.20 | 1.03 | 1.12 | 1.04 | 0.93 | 1.02 | 1.19 |
| E9PK91 | Bcl-2-associated transcription factor 1           | BCLAF1   | 183 | S | 0.997 | 101.3 | 1.20 | 1.36 | NaN  | 2.09 | NaN  | NaN  | 4.56 | NaN  | NaN  |
| E9PK91 | Bcl-2-associated transcription factor 1           | BCLAF1   | 222 | S | 1     | 193.7 | 0.56 | 0.64 | 0.80 | 0.71 | 0.82 | 0.68 | 1.00 | 0.94 | 0.94 |
| E9PK91 | Bcl-2-associated transcription factor 1           | BCLAF1   | 531 | S | 1     | 113.9 | 2.19 | 2.19 | 2.21 | 1.87 | 1.48 | 1.61 | 2.12 | 2.13 | 2.21 |
| E9PK91 | Bcl-2-associated transcription factor 1           | BCLAF1   | 285 | S | 0.978 | 105.5 | 0.59 | 0.72 | NaN  | 0.86 | 0.83 | 1.30 | NaN  | 1.61 | 1.77 |
| E9PK91 | Bcl-2-associated transcription factor 1           | BCLAF1   | 287 | S | 0.931 | 89.44 | NaN  | 1.45 | NaN  | 1.44 | 1.55 | 1.30 | NaN  | 1.27 | NaN  |
| F5H0D8 |                                                   | CELF1    | 18  | S | 0.726 | 134   | 0.93 | 0.74 | NaN  | NaN  | NaN  | NaN  | NaN  | NaN  | NaN  |
| E9PS47 | Phosphatidylserine synthase 2                     | PTDSS2   | 16  | S | 1     | 57.29 | 1.65 | 1.66 | NaN  | NaN  | NaN  | NaN  | NaN  | NaN  | NaN  |
| H0YE74 | Cleavage stimulation factor subunit 3             | CSTF3    | 65  | S | 1     | 197.8 | 1.10 | 1.07 | 0.98 | 1.08 | 1.02 | 1.09 | 0.87 | 0.80 | 0.97 |
| E9PQA1 | Small acidic protein                              | C11orf58 | 15  | S | 0.992 | 281.5 | NaN  | 1.29 | 1.36 | 1.21 | 1.14 | 1.20 | 1.33 | 1.25 | NaN  |
| E9PQA1 | Small acidic protein                              | C11orf58 | 17  | S | 1     | 663   | 1.27 | 1.25 | 1.16 | 1.13 | 0.91 | 1.08 | 1.05 | 1.07 | 1.35 |
| E9PMG1 | RalBP1-associated Eps domain-containing protein 1 | REPS1    | 650 | S | 1     | 171.8 | 1.26 | 1.25 | 1.24 | 1.03 | 0.98 | 1.51 | 1.32 | 1.31 | 1.29 |
| E9PMG1 | RalBP1-associated Eps domain-containing protein 1 | REPS1    | 535 | S | 0.965 | 64.1  | NaN  | 1.59 | 1.82 | 1.80 | 1.72 | 1.76 | 1.17 | 1.21 | NaN  |
| E9PMG1 | RalBP1-associated Eps domain-containing protein 1 | REPS1    | 455 | S | 0.746 | 49.09 | 1.32 | NaN  | NaN  | NaN  | NaN  | NaN  | 1.12 | 1.38 | NaN  |
| E9PMG1 | RalBP1-associated Eps domain-containing protein 1 | REPS1    | 162 | S | 1     | 93.79 | NaN  | 1.62 | NaN  | 1.51 | 1.70 | NaN  | NaN  | NaN  | NaN  |
| E9PMG1 | RalBP1-associated Eps domain-containing protein 1 | REPS1    | 166 | S | 1     | 93.79 | NaN  | 1.62 | NaN  | 1.51 | 1.70 | NaN  | NaN  | NaN  | NaN  |

|        |                                                   |          |      |   |       |       |      |      |      |      |      |      |      |      |      |
|--------|---------------------------------------------------|----------|------|---|-------|-------|------|------|------|------|------|------|------|------|------|
| E9PMG1 | RalBP1-associated Eps domain-containing protein 1 | REPS1    | 170  | S | 0.995 | 177.1 | NaN  | 1.62 | 0.75 | 0.82 | 1.70 | 0.77 | NaN  | NaN  | 0.84 |
| E9PMG4 | Telomerase Cajal body protein 1                   | WRAP53   | 85   | S | 0.951 | 82.49 | NaN  | NaN  | 0.67 | 0.43 | 0.55 | NaN  | 1.19 | 1.18 | 1.17 |
| E9PMG4 | Telomerase Cajal body protein 1                   | WRAP53   | 90   | S | 0.974 | 82.49 | NaN  | NaN  | 0.67 | 0.43 | 0.55 | NaN  | 1.19 | 1.18 | 1.17 |
| E9PMG4 | Telomerase Cajal body protein 1                   | WRAP53   | 54   | S | 1     | 85.19 | 0.71 | 0.68 | NaN  | 0.76 | 0.78 | NaN  | 0.97 | 1.20 | NaN  |
| E9PMG4 | Telomerase Cajal body protein 1                   | WRAP53   | 458  | S | 0.985 | 182.3 | 0.51 | 0.61 | 0.60 | 0.53 | NaN  | 0.67 | 1.39 | NaN  | 1.43 |
| E9PMW5 | Tripartite motif-containing protein 3             | TRIM3    | 7    | S | 1     | 100.6 | 0.54 | 0.53 | 0.70 | 0.71 | NaN  | 0.81 | 0.57 | 0.66 | 0.62 |
| E9PMQ6 | Heat shock factor protein 1                       | HSF1     | 363  | S | 0.999 | 127.3 | 0.75 | 0.65 | 0.69 | 0.57 | NaN  | 0.58 | 1.13 | 1.08 | 1.05 |
| E9PMQ6 | Heat shock factor protein 1                       | HSF1     | 314  | S | 0.714 | 81.13 | NaN  | NaN  | NaN  | 0.69 | 0.78 | NaN  | NaN  | NaN  | NaN  |
| E9PMR6 | Rho guanine nucleotide exchange factor 12         | ARHGEF12 | 1286 | S | 1     | 75.1  | 0.57 | 1.45 | NaN  | NaN  | NaN  | NaN  | NaN  | NaN  | NaN  |
| E9PMR6 | Rho guanine nucleotide exchange factor 12         | ARHGEF12 | 206  | S | 0.995 | 71.3  | 0.92 | 0.77 | NaN  | 1.16 | 0.87 | 1.16 | NaN  | 1.06 | 1.23 |
| E9PMS6 | LIM domain only protein 7                         | LMO7     | 591  | S | 1     | 130.8 | 0.69 | 0.83 | 0.66 | 0.87 | 0.99 | 0.98 | 0.78 | 0.75 | 0.78 |
| E9PMS6 | LIM domain only protein 7                         | LMO7     | 155  | S | 1     | 89.99 | 1.95 | 2.02 | NaN  | NaN  | 0.80 | NaN  | 1.86 | NaN  | 1.37 |
| E9PMS6 | LIM domain only protein 7                         | LMO7     | 553  | S | 0.999 | 243.8 | 0.72 | 0.67 | 0.69 | 0.56 | 0.71 | 0.65 | 0.64 | 0.65 | 0.65 |
| E9PMS6 | LIM domain only protein 7                         | LMO7     | 556  | S | 0.95  | 218.7 | 2.14 | 1.62 | 1.78 | 2.06 | NaN  | 1.85 | 1.29 | NaN  | 1.31 |
| E9PMS6 | LIM domain only protein 7                         | LMO7     | 1102 | S | 1     | 96.33 | 5.41 | 3.75 | NaN  | NaN  | NaN  | NaN  | NaN  | NaN  | NaN  |
| E9PMS6 | LIM domain only protein 7                         | LMO7     | 1085 | S | 0.983 | 60.03 | 1.41 | 2.46 | NaN  | NaN  | NaN  | NaN  | NaN  | NaN  | NaN  |
| E9PMS6 | LIM domain only protein 7                         | LMO7     | 1185 | S | 0.999 | 80.47 | NaN  | 2.87 | 2.39 | 1.93 | 1.64 | 1.72 | 1.19 | 1.36 | 1.15 |
| E9PMS6 | LIM domain only protein 7                         | LMO7     | 1015 | S | 0.859 | 103.4 | NaN  | NaN  | NaN  | NaN  | NaN  | NaN  | 0.86 | 0.89 | NaN  |
| E9PMS6 | LIM domain only protein 7                         | LMO7     | 432  | S | 0.998 | 169.7 | NaN  | 1.31 | 1.40 | 1.23 | 1.24 | 1.20 | 1.09 | NaN  | 1.01 |
| E9PNJ4 | Stromal interaction molecule 1                    | STIM1    | 348  | S | 0.533 | 66.64 | NaN  | NaN  | NaN  | NaN  | 2.21 | NaN  | 2.28 | NaN  | 1.77 |
| E9PNJ4 | Stromal interaction molecule 1                    | STIM1    | 445  | S | 0.956 | 242.1 | 1.11 | NaN  | NaN  | 0.98 | 0.99 | NaN  | 1.11 | 1.45 | NaN  |
| H0YDN6 | kinase;Diacylglycerol zeta Diacylglycerol         | DGKZ     | 19   | S | 0.5   | 54.07 | 0.96 | 1.01 | NaN  | 1.07 | 1.09 | NaN  | 1.01 | 0.96 | NaN  |
| H0YDN6 | kinase;Diacylglycerol zeta Diacylglycerol         | DGKZ     | 20   | S | 0.5   | 54.07 | 0.96 | 1.01 | NaN  | 1.07 | 1.09 | NaN  | 1.01 | 0.96 | NaN  |
| E9PP21 | Cysteine and glycine-rich protein 1               | CSRP1    | 159  | S | 1     | 202.8 | NaN  | 1.03 | 1.18 | NaN  | NaN  | 1.23 | NaN  | 0.81 | NaN  |
| E9PPY3 | Ribosomal RNA-processing protein 8                | RRP8     | 62   | S | 0.99  | 109.6 | NaN  | NaN  | 1.28 | 1.03 | 1.10 | 0.78 | NaN  | NaN  | 1.19 |
| E9PPY3 | Ribosomal RNA-processing protein 8                | RRP8     | 64   | S | 0.999 | 109.6 | NaN  | NaN  | 1.28 | 1.03 | 1.10 | 0.78 | NaN  | NaN  | 1.19 |
| E9PPY3 | Ribosomal RNA-processing protein 8                | RRP8     | 104  | S | 1     | 80.41 | NaN  | NaN  | NaN  | 0.90 | 0.87 | 1.00 | NaN  | 1.16 | 1.29 |
| E9PPY3 | Ribosomal RNA-processing protein 8                | RRP8     | 106  | S | 1     | 80.41 | NaN  | NaN  | NaN  | 0.90 | 0.87 | 1.00 | NaN  | 1.16 | 1.29 |
| E9PQC4 | Kinetochore protein Nuf2                          | NUF2     | 247  | S | 1     | 67.39 | 0.52 | 0.59 | 0.68 | 0.99 | 0.96 | 0.88 | 0.72 | 0.71 | 0.69 |



|        |                                                             |         |      |   |       |       |      |      |      |      |      |      |      |      |      |
|--------|-------------------------------------------------------------|---------|------|---|-------|-------|------|------|------|------|------|------|------|------|------|
| E9PQP7 | Serine/threonine-protein phosphatase 6 regulatory subunit 3 | PPP6R3  | 619  | S | 0.663 | 84.75 | 0.97 | 0.96 | NaN  | NaN  | NaN  | NaN  | NaN  | NaN  | NaN  |
| E9PQP7 | Serine/threonine-protein phosphatase 6 regulatory subunit 3 | PPP6R3  | 385  | S | 1     | 299   | 0.86 | 0.87 | 0.86 | 0.89 | 0.91 | 0.83 | 0.98 | 0.93 | 0.93 |
| E9PRB3 | Deoxynucleotidyltransferase terminal-interacting protein 2  | DNTTIP2 | 124  | S | 0.972 | 132.4 | 1.24 | 1.27 | NaN  | 1.61 | 1.65 | 1.53 | 0.89 | 0.75 | NaN  |
| F2Z2E2 | Ras GTPase-activating-like protein IQGAP3                   | IQGAP3  | 496  | S | 1     | 116.5 | 1.01 | NaN  | NaN  | 2.11 | 2.26 | 1.96 | NaN  | 0.75 | NaN  |
| F2Z2T1 | Nuclear cap-binding protein subunit 1                       | NCBP1   | 22   | S | 0.729 | 90.4  | NaN  | NaN  | NaN  | 0.95 | NaN  | 0.85 | NaN  | NaN  | NaN  |
| F2Z3H6 | B-cell CLL/lymphoma 7 protein family member B               | BCL7B   | 133  | S | 0.969 | 144.3 | NaN  | NaN  | NaN  | 0.99 | 0.80 | NaN  | 1.03 | NaN  | NaN  |
| F5GWT4 | Serine/threonine-protein kinase WNK1                        | WNK1    | 1781 | S | 0.932 | 90.08 | 0.92 | NaN  | 0.92 | 1.00 | 1.05 | 1.04 | 0.77 | 0.85 | 0.98 |
| F5GWT4 | Serine/threonine-protein kinase WNK1                        | WNK1    | 1784 | S | 0.997 | 90.08 | 0.92 | 1.05 | 0.92 | 1.00 | 1.06 | 1.13 | 0.77 | 0.85 | 0.88 |
| F5GWT4 | Serine/threonine-protein kinase WNK1                        | WNK1    | 1730 | S | 1     | 131.9 | 1.13 | 1.05 | 1.08 | 1.21 | 1.37 | 1.32 | 0.72 | 0.70 | 0.85 |
| F5GWT4 | Serine/threonine-protein kinase WNK1                        | WNK1    | 185  | S | 0.746 | 67.65 | 0.71 | NaN  | NaN  | 0.91 | 0.69 | 0.84 | 0.82 | NaN  | 0.75 |
| F5GX09 | Protein FAM76B                                              | FAM76B  | 193  | S | 1     | 118.5 | 1.41 | NaN  | NaN  | 0.59 | 0.48 | NaN  | NaN  | NaN  | 0.54 |
| F5GX58 | Cell division cycle-associated protein 3                    | CDCA3   | 87   | S | 0.998 | 47.53 | 1.61 | 1.23 | 1.76 | 2.84 | NaN  | 2.58 | NaN  | 0.88 | NaN  |
| F5GYF8 | Signal-induced proliferation-associated 1-like protein 1    | SIPA1L1 | 1003 | S | 0.997 | 156.6 | NaN  | 1.67 | NaN  | 1.84 | 1.68 | NaN  | 2.62 | 2.41 | NaN  |
| F5GYF8 | Signal-induced proliferation-associated 1-like protein 1    | SIPA1L1 | 1039 | S | 0.998 | 133   | 1.31 | NaN  | 1.63 | 1.21 | 1.29 | 1.53 | 1.84 | 2.08 | 1.84 |
| F5H3F0 | Ubiquitin thioesterase OTUB1                                | OTUB1   | 16   | S | 0.847 | 89.68 | 0.67 | NaN  | NaN  | 0.92 | NaN  | 1.10 | NaN  | NaN  | 0.80 |
| R4GN16 | Striatin-4                                                  | STRN4   | 126  | S | 1     | 215.7 | 0.95 | 1.11 | 1.16 | NaN  | 1.31 | 0.93 | 0.99 | 1.18 | 1.34 |
| F5H1K3 | tRNA 2'-phosphotransferase 1                                | TRPT1   | 98   | S | 0.938 | 95.21 | NaN  | NaN  | 0.98 | 0.82 | NaN  | NaN  | 0.83 | 1.10 | 1.18 |
| F5H1U9 | Multiple PDZ domain protein                                 | MPDZ    | 483  | S | 0.998 | 77.37 | NaN  | NaN  | NaN  | NaN  | NaN  | NaN  | 0.95 | 0.73 | NaN  |
| F5H1U9 | Multiple PDZ domain protein                                 | MPDZ    | 354  | S | 0.783 | 107.2 | 1.06 | 1.07 | NaN  | 0.99 | NaN  | NaN  | 1.20 | 0.92 | 0.86 |
| F5H452 | Transcription factor Dp-1                                   | TFDP1   | 23   | S | 1     | 60.3  | 0.49 | 0.57 | NaN  | 0.88 | 1.15 | NaN  | 0.69 | 0.72 | NaN  |
| F5H658 | ATP-dependent RNA helicase DHX8                             | DHX8    | 460  | S | 1     | 60.3  | 0.43 | 0.45 | 0.49 | NaN  | 0.69 | 0.78 | 0.38 | 0.41 | 0.38 |
| F5H6E2 | Unconventional myosin-Ic                                    | MYO1C   | 384  | S | 0.989 | 109.8 | 1.17 | 1.14 | 1.34 | 1.74 | 1.84 | 1.63 | 0.92 | 0.98 | 1.04 |
| F5H7D6 | Transducin-like enhancer protein 3                          | TLE3    | 230  | S | 0.997 | 136.7 | NaN  | NaN  | NaN  | 0.55 | NaN  | NaN  | 1.62 | 1.17 | 1.47 |
| F5H7D6 | Transducin-like enhancer protein 3                          | TLE3    | 184  | S | 0.899 | 96.69 | NaN  | 0.27 | 0.38 | 0.30 | 0.39 | NaN  | 0.92 | NaN  | 0.86 |
| F5H7D6 | Transducin-like enhancer protein 3                          | TLE3    | 189  | S | 0.994 | 120.3 | NaN  | NaN  | 0.48 | 0.44 | 0.37 | 0.38 | 1.09 | NaN  | 1.14 |
| F5H8D7 | DNA repair protein XRCC1                                    | XRCC1   | 415  | S | 0.626 | 115.3 | 0.50 | NaN  | NaN  | 0.75 | NaN  | 0.69 | NaN  | NaN  | NaN  |
| F5H8D7 | DNA repair protein XRCC1                                    | XRCC1   | 416  | S | 0.845 | 85.73 | 0.52 | NaN  | NaN  | 0.65 | 0.71 | 0.72 | 0.68 | 0.76 | NaN  |

|        |                                                                                                     |          |      |   |       |       |      |      |      |      |      |      |      |      |      |
|--------|-----------------------------------------------------------------------------------------------------|----------|------|---|-------|-------|------|------|------|------|------|------|------|------|------|
| H0YAQ0 | Set1/Ash2 histone methyltransferase complex subunit ASH2                                            | ASH2L    | 85   | S | 1     | 53.76 | 0.79 | 0.80 | 0.97 | 0.77 | 0.76 | 0.71 | NaN  | 1.02 | 0.97 |
| F6PQP6 |                                                                                                     | EPN2     | 192  | S | 1     | 61.73 | 0.51 | 0.68 | NaN  | NaN  | NaN  | NaN  | 0.78 | NaN  | NaN  |
| F6RY50 | Signal-induced proliferation-associated protein 1                                                   | SIPA1    | 737  | S | 0.843 | 78.7  | NaN  | NaN  | NaN  | 0.96 | 0.98 | NaN  | NaN  | 1.21 | NaN  |
| F6VDH7 | Hsc70-interacting protein                                                                           | ST13     | 38   | S | 1     | 50.24 | 0.56 | NaN  | NaN  | NaN  | 0.77 | NaN  | 0.83 | 0.74 | NaN  |
| F6VDH7 | Hsc70-interacting protein                                                                           | ST13     | 39   | S | 1     | 50.24 | 0.56 | NaN  | NaN  | NaN  | 0.77 | NaN  | 0.83 | 0.74 | NaN  |
| F6VDH7 | Hsc70-interacting protein                                                                           | ST13     | 42   | S | 1     | 50.24 | 0.56 | NaN  | NaN  | NaN  | 0.77 | NaN  | 0.83 | 0.74 | NaN  |
| F8VDP4 | CAD protein;Glutamine-dependent carbamoyl-phosphate synthase;Aspartate carbamoyltransferase;Dihydro | CAD      | 1796 | S | 1     | 59.92 | 0.86 | 1.17 | 0.86 | 0.97 | 1.03 | NaN  | 1.59 | 1.55 | 1.65 |
| H3BV98 | rotase RISC-loading complex subunit TARBP2 Heterogeneous nuclear ribonucleoprotein                  | TARBP2   | 53   | S | 1     | 156.5 | 0.91 | 1.12 | 0.79 | NaN  | NaN  | 0.75 | 0.78 | 0.49 | NaN  |
| F8VTQ5 | A1;Heterogeneous nuclear ribonucleoprotein A1, N-terminally processed                               | HNRNPA1  | 6    | S | 1     | 257.2 | 1.48 | 1.42 | 1.32 | 1.46 | 1.42 | 1.43 | 1.11 | 1.14 | 1.16 |
| F8VVL1 | Density-regulated protein                                                                           | DENR     | 73   | S | 1     | 250.5 | 0.63 | 0.61 | 0.62 | 0.91 | 0.90 | 0.97 | 0.91 | 1.02 | 1.04 |
| F8VXC8 | SWI/SNF complex subunit SMARCC2                                                                     | SMARCC2  | 347  | S | 1     | 127.3 | 0.79 | 0.76 | 0.70 | 1.17 | 1.12 | 1.02 | 0.77 | 0.67 | 0.79 |
| F8VXC8 | SWI/SNF complex subunit SMARCC2                                                                     | SMARCC2  | 302  | S | 1     | 118.7 | 0.87 | 0.87 | 0.88 | 0.89 | 0.93 | 0.92 | 0.95 | 0.97 | 0.98 |
| F8VXC8 | SWI/SNF complex subunit SMARCC2                                                                     | SMARCC2  | 304  | S | 1     | 118.7 | 0.85 | 0.86 | 0.88 | 0.93 | 0.93 | 0.92 | 0.94 | 0.97 | 0.97 |
| F8VXC8 | SWI/SNF complex subunit SMARCC2                                                                     | SMARCC2  | 306  | S | 0.978 | 72.52 | 1.67 | 1.61 | NaN  | NaN  | 0.87 | NaN  | 0.95 | 1.17 | 0.99 |
| F8VXC8 | SWI/SNF complex subunit SMARCC2                                                                     | SMARCC2  | 283  | S | 0.999 | 153   | 0.80 | 0.74 | 0.90 | 1.09 | 1.09 | 1.12 | 1.11 | 1.22 | 1.04 |
| F8VY01 | FYVE, RhoGEF and PH domain-containing protein 6                                                     | FGD6     | 721  | S | 1     | 71.81 | NaN  | NaN  | NaN  | NaN  | 0.76 | NaN  | 0.88 | 0.67 | NaN  |
| F8W038 | Chromatin complexes subunit BAP18                                                                   | C17orf49 | 96   | S | 1     | 154.5 | 1.31 | 1.29 | 1.48 | 1.43 | 1.50 | 1.49 | 0.93 | 0.92 | 0.95 |
| F8W038 | Chromatin complexes subunit BAP18                                                                   | C17orf49 | 35   | S | 0.5   | 97.12 | 2.62 | 2.36 | NaN  | NaN  | NaN  | NaN  | NaN  | NaN  | NaN  |
| F8W038 | Chromatin complexes subunit BAP18                                                                   | C17orf49 | 36   | S | 0.5   | 97.12 | 2.62 | 2.36 | NaN  | NaN  | NaN  | NaN  | NaN  | NaN  | NaN  |
| F8W726 | Ubiquitin-associated protein 2-like                                                                 | UBAP2L   | 620  | S | 0.885 | 155.9 | 1.07 | 1.17 | 1.25 | 1.35 | 1.30 | 1.23 | 0.85 | 0.88 | 0.92 |
| F8W726 | Ubiquitin-associated protein 2-like                                                                 | UBAP2L   | 464  | S | 0.622 | 168.9 | 3.68 | 3.56 | 4.11 | NaN  | NaN  | NaN  | NaN  | NaN  | NaN  |
| F8W726 | Ubiquitin-associated protein 2-like                                                                 | UBAP2L   | 465  | S | 0.906 | 129.3 | NaN  | 4.41 | 3.84 | 3.19 | NaN  | 2.97 | 2.56 | 3.39 | 2.39 |

|        |                                                                                                                         |         |      |   |       |       |      |      |      |      |      |      |      |      |      |
|--------|-------------------------------------------------------------------------------------------------------------------------|---------|------|---|-------|-------|------|------|------|------|------|------|------|------|------|
| F8W726 | Ubiquitin-associated protein 2-like                                                                                     | UBAP2L  | 478  | S | 1     | 243.2 | 1.04 | 1.43 | 0.64 | 0.79 | NaN  | 0.78 | 0.57 | NaN  | 0.63 |
| F8W726 | Ubiquitin-associated protein 2-like                                                                                     | UBAP2L  | 488  | S | 0.906 | 155.6 | 1.04 | 1.43 | 1.18 | 1.79 | 1.90 | 1.94 | 0.57 | 0.53 | 0.68 |
| F8W914 | Reticulon                                                                                                               | RTN4    | 153  | S | 0.994 | 244.7 | 0.96 | 1.14 | NaN  | NaN  | 1.28 | NaN  | 1.02 | 1.08 | NaN  |
| F8W930 | Insulin-like growth factor 2 mRNA-binding protein 2                                                                     | IGF2BP2 | 168  | S | 0.984 | 142.4 | 1.36 | 1.39 | 1.30 | 1.39 | 1.47 | 1.23 | NaN  | 1.10 | 1.21 |
| F8W930 | Insulin-like growth factor 2 mRNA-binding protein 2                                                                     | IGF2BP2 | 170  | S | 0.999 | 149.2 | 0.82 | 0.89 | 1.67 | 0.69 | 0.75 | 2.00 | 1.06 | 1.02 | 0.95 |
| F8W9J4 | Dystonin                                                                                                                | DST     | 1378 | S | 0.77  | 64.1  | NaN  | 0.91 | 0.78 | 1.54 | 1.58 | 1.39 | 0.45 | NaN  | 0.52 |
| F8W9J4 | Dystonin                                                                                                                | DST     | 1382 | S | 0.999 | 81.33 | 0.73 | 0.74 | NaN  | 1.53 | 1.58 | 1.46 | 0.49 | 0.55 | 0.50 |
| F8W9J4 | Dystonin                                                                                                                | DST     | 2919 | S | 1     | 78.43 | 0.92 | 0.85 | NaN  | 0.91 | 1.34 | 1.55 | 1.06 | 1.34 | 1.32 |
| F8W9J4 | Dystonin                                                                                                                | DST     | 2671 | S | 0.997 | 85.88 | NaN  | NaN  | NaN  | NaN  | 2.49 | 1.25 | NaN  | NaN  | NaN  |
| F8WA39 | Myotubularin-related protein 1 Eukaryotic translation initiation factor 2A;Eukaryotic translation initiation factor 2A, | MTMR1   | 43   | S | 0.993 | 87.49 | NaN  | 0.81 | 1.30 | NaN  | 0.93 | NaN  | 1.08 | 1.03 | 1.63 |
| F8WAE5 | Eukaryotic translation initiation factor 2A,                                                                            | EIF2A   | 498  | S | 0.591 | 88.95 | 0.73 | NaN  | 0.68 | 0.69 | 0.72 | 0.73 | 0.89 | 0.81 | 0.93 |
| F8WAE5 | N-terminally processed Eukaryotic translation initiation factor 2A;Eukaryotic translation initiation factor 2A,         | EIF2A   | 501  | S | 1     | 233.5 | 0.77 | 0.66 | 0.76 | 0.72 | 0.66 | 0.73 | 0.96 | 0.96 | 0.88 |
| F8WAZ4 | N-terminally processed GTP-binding protein 1                                                                            | GTPBP1  | 44   | S | 1     | 79.88 | NaN  | 1.10 | 1.30 | 1.43 | 1.25 | 1.42 | 1.35 | 1.71 | 1.88 |
| F8WAZ4 | GTP-binding protein 1                                                                                                   | GTPBP1  | 47   | S | 1     | 79.88 | NaN  | 1.10 | 1.30 | 1.43 | 1.25 | 1.42 | 1.35 | 1.71 | 1.88 |
| F8WAZ4 | GTP-binding protein 1                                                                                                   | GTPBP1  | 25   | S | 0.677 | 78.94 | 0.90 | 0.84 | NaN  | NaN  | NaN  | NaN  | NaN  | NaN  | NaN  |
| F8WBF9 | Protein NDRG3                                                                                                           | NDRG3   | 266  | S | 1     | 104.2 | NaN  | NaN  | 1.44 | NaN  | NaN  | 0.99 | 2.07 | 1.29 | 1.24 |
| F8WBL2 | Bystin                                                                                                                  | BYSL    | 98   | S | 1     | 184.2 | 0.74 | 0.89 | 0.75 | 0.95 | 0.90 | 1.02 | 0.59 | 0.59 | 0.58 |
| F8WCX2 | Zinc finger protein 687                                                                                                 | ZNF687  | 253  | S | 0.96  | 113.7 | 0.65 | NaN  | NaN  | NaN  | 0.55 | 0.73 | 0.80 | 0.79 | NaN  |
| F8WCX2 | Zinc finger protein 687                                                                                                 | ZNF687  | 183  | S | 0.685 | 49.91 | 0.67 | 0.94 | NaN  | 0.62 | 0.87 | NaN  | NaN  | NaN  | NaN  |
| F8WD88 | Histone H3-like centromeric protein A                                                                                   | CENPA   | 17   | S | 0.996 | 61.86 | 0.96 | 1.08 | 0.96 | 1.04 | 1.00 | NaN  | 0.89 | 1.01 | 0.91 |
| F8WD88 | Histone H3-like centromeric protein A                                                                                   | CENPA   | 19   | S | 0.958 | 61.86 | 0.96 | 1.08 | 0.96 | 1.04 | 1.00 | NaN  | 0.89 | 1.01 | 0.91 |
| F8WDB4 | Leucine-rich repeat and WD repeat-containing protein 1                                                                  | LRWD1   | 99   | S | 0.952 | 125.6 | NaN  | 0.92 | 0.89 | NaN  | NaN  | NaN  | 1.30 | NaN  | NaN  |
| F8WDB4 | Leucine-rich repeat and WD repeat-containing protein 1                                                                  | LRWD1   | 60   | S | 1     | 93.8  | 0.60 | 0.66 | 0.69 | NaN  | 0.74 | 0.84 | 0.79 | NaN  | NaN  |
| F8WF93 | Dol-P-Man:Man(5)GlcNAc(2)-PP-Dol alpha-1,3-mannosyltransferase                                                          | ALG3    | 13   | S | 0.996 | 86.09 | 2.10 | 2.02 | 2.15 | 1.92 | 2.45 | 2.03 | 1.74 | 1.24 | 1.41 |
| G3V1D1 | Ferritin;Ferritin heavy chain;Ferritin heavy chain, N-terminally processed                                              | FTH1    | 109  | S | 0.997 | 175.1 | 0.69 | 0.67 | 0.61 | 0.79 | 0.98 | 0.88 | 0.40 | 0.58 | NaN  |
| G3V198 | Nuclear pore complex protein Nup160                                                                                     | NUP160  | 1122 | S | 0.999 | 102.4 | 0.57 | 0.66 | 0.60 | 0.65 | 0.70 | 0.67 | 0.85 | 0.90 | 0.90 |
| H0YER7 | Apoptosis inhibitor 5                                                                                                   | API5    | 277  | S | 0.797 | 166   | NaN  | NaN  | 0.87 | NaN  | 1.04 | 1.03 | 1.09 | NaN  | NaN  |
| H0YER7 | Apoptosis inhibitor 5                                                                                                   | API5    | 279  | S | 0.97  | 225.1 | 0.81 | 0.81 | 0.81 | 1.01 | 0.95 | 0.99 | 0.79 | 0.76 | 0.86 |

|        |                                                                                               |        |       |   |       |       |      |      |      |      |      |      |      |      |      |
|--------|-----------------------------------------------------------------------------------------------|--------|-------|---|-------|-------|------|------|------|------|------|------|------|------|------|
| G3V2D6 | Heterogeneous nuclear ribonucleoproteins C1/C2                                                | HNRNPC | 207   | S | 1     | 243   | 0.57 | NaN  | NaN  | NaN  | 0.71 | NaN  | 0.90 | 0.88 | NaN  |
| G3V2R1 | Protein Smaug homolog 1                                                                       | SAMD4A | 11    | S | 0.995 | 117.3 | 1.01 | 1.01 | 1.12 | NaN  | NaN  | NaN  | NaN  | NaN  | NaN  |
| G3V340 | Striatin-3                                                                                    | STRN3  | 257   | S | 1     | 170.3 | 0.70 | 0.81 | 0.57 | 0.98 | 1.07 | 0.84 | 0.67 | 0.78 | 0.61 |
| G3V4X8 | SNW domain-containing protein 1                                                               | SNW1   | 62    | S | 1     | 129.9 | 0.58 | 0.49 | 0.41 | 0.62 | 0.61 | 0.62 | 0.30 | 0.32 | 0.32 |
| G3V4X8 | SNW domain-containing protein 1                                                               | SNW1   | 70    | S | 0.993 | 129.9 | 0.83 | 0.79 | 0.84 | 1.03 | 0.83 | 0.97 | 0.71 | 0.74 | 0.74 |
| G3V4X8 | SNW domain-containing protein 1                                                               | SNW1   | 72    | S | 0.5   | 91.97 | NaN  | NaN  | NaN  | NaN  | 0.96 | NaN  | 0.67 | 0.60 | NaN  |
| Q5TAQ8 | DDB1- and CUL4-associated factor 8                                                            | DCAF8  | 99    | S | 1     | 131   | NaN  | NaN  | NaN  | NaN  | NaN  | NaN  | 1.03 | 1.09 | 1.12 |
| G3V411 | Zinc finger CCCH domain-containing protein 14                                                 | ZC3H14 | 217   | S | 1     | 113.6 | 1.70 | 1.75 | 1.37 | 1.58 | 1.63 | 1.46 | 1.78 | 1.56 | 1.43 |
| H0YJ03 | Proteasome subunit alpha type-3                                                               | PSMA3  | 78    | S | 1     | 227.4 | 0.63 | 0.60 | 0.63 | 0.88 | 1.01 | 0.91 | 0.48 | 0.47 | 0.57 |
| G3V529 | ATP-dependent RNA helicase DDX24                                                              | DDX24  | 39    | S | 1     | 162.8 | 1.00 | 1.28 | 1.29 | 0.79 | 0.86 | 0.84 | 0.77 | 0.80 | 0.67 |
| G3V529 | ATP-dependent RNA helicase DDX24                                                              | DDX24  | 252   | S | 0.677 | 79.02 | 1.05 | NaN  | 1.21 | NaN  | NaN  | 1.14 | NaN  | NaN  | NaN  |
| G3V599 | Melanoma inhibitory activity protein 2                                                        | MIA2   | 1071  | S | 1     | 124.6 | 3.24 | 2.89 | 2.93 | NaN  | NaN  | 2.47 | NaN  | NaN  | NaN  |
| G3V5E1 | Cyclin-K                                                                                      | CCNK   | 340   | S | 1     | 101.5 | 0.99 | 0.79 | 0.81 | 0.88 | 0.83 | 0.82 | 0.88 | 0.95 | 0.88 |
| G3V5E1 | Cyclin-K                                                                                      | CCNK   | 324   | S | 1     | 79.47 | 0.92 | 0.81 | 0.82 | 0.88 | 0.78 | 0.92 | 0.92 | 1.01 | 1.09 |
| G3V5E1 | Cyclin-K                                                                                      | CCNK   | 328   | S | 0.639 | 79.47 | 0.92 | 0.81 | 0.82 | 0.88 | 0.93 | 0.92 | 1.04 | 1.01 | 1.09 |
| H0YG16 | Kinesin light chain 1                                                                         | KLC1   | 152   | S | 0.967 | 77.75 | 1.19 | 1.16 | NaN  | 0.89 | 1.17 | NaN  | NaN  | NaN  | 1.04 |
| H0YG16 | Kinesin light chain 1                                                                         | KLC1   | 155   | S | 0.883 | 72.89 | NaN  | NaN  | 1.27 | NaN  | 1.17 | 1.11 | 0.93 | 0.93 | NaN  |
| H0YG16 | Kinesin light chain 1                                                                         | KLC1   | 66    | S | 0.985 | 43.72 | 2.74 | NaN  | 2.71 | 5.54 | 4.79 | NaN  | 1.59 | 1.05 | NaN  |
| G3V5V3 | Nuclear export mediator factor NEMF                                                           | NEMF   | 705   | S | 1     | 102.7 | 0.46 | 0.57 | NaN  | 0.60 | 0.60 | 0.66 | NaN  | NaN  | 0.78 |
| G3V5V3 | Nuclear export mediator factor NEMF                                                           | NEMF   | 706   | S | 1     | 102.7 | 0.46 | 0.57 | NaN  | 0.60 | 0.60 | 0.66 | NaN  | NaN  | 0.78 |
| Q5QP22 | RNA-binding protein 39                                                                        | RBM39  | 136   | S | 1     | 142.4 | 1.07 | 1.10 | 1.09 | 1.15 | 1.13 | 1.10 | 0.89 | 0.92 | 0.85 |
| Q5QP22 | RNA-binding protein 39                                                                        | RBM39  | 97    | S | 0.996 | 70.4  | 1.30 | NaN  | 1.99 | NaN  | 1.32 | 1.34 | 1.37 | 1.28 | 1.38 |
| G3XAM7 | Catenin alpha-1<br>Lamina-associated polypeptide 2, isoforms beta/gamma;Thymopietin;Thymopent | CTNNA1 | 641   | S | 1     | 299.9 | 1.36 | 1.46 | 1.42 | 1.28 | 1.28 | 1.27 | 1.16 | 1.08 | 1.18 |
| P42166 | Thymopent;Lamina-associated polypeptide 2, isoform alpha;Thymopietin;Thymopent                | TMPO   | 66;66 | S | 1     | 311.2 | 1.28 | 1.29 | 0.62 | 1.27 | 0.67 | 1.38 | 0.94 | 0.72 | 0.94 |

|        |                                                                                                                                                       |        |       |   |       |       |      |      |      |      |      |      |      |      |      |
|--------|-------------------------------------------------------------------------------------------------------------------------------------------------------|--------|-------|---|-------|-------|------|------|------|------|------|------|------|------|------|
| P42166 | Lamina-associated polypeptide 2, isoforms beta/gamma;Thymopoietin;Thymopentyn;Lamina-associated polypeptide 2, isoform alpha;Thymopoietin;Thymopentyn | TMPO   | 67;67 | S | 1     | 312.7 | 0.62 | 0.71 | 1.28 | 0.69 | 0.67 | 0.70 | 0.69 | 0.72 | 0.83 |
| G5E9A6 | Ubiquitin carboxyl-terminal hydrolase 11                                                                                                              | USP11  | 905   | S | 0.98  | 67.83 | NaN  | NaN  | 0.33 | NaN  | NaN  | NaN  | 0.75 | 0.96 | NaN  |
| G5E9A6 | Ubiquitin carboxyl-terminal hydrolase 11                                                                                                              | USP11  | 605   | S | 0.997 | 115.3 | 0.49 | NaN  | NaN  | NaN  | NaN  | NaN  | 1.25 | 1.92 | 0.91 |
| G5E9C0 | Sp110 nuclear body protein                                                                                                                            | SP110  | 256   | S | 1     | 86.54 | 0.34 | 0.48 | NaN  | 0.78 | NaN  | NaN  | NaN  | NaN  | NaN  |
| G5E9C8 | Son of sevenless homolog 1                                                                                                                            | SOS1   | 1195  | S | 0.998 | 56.91 | 1.10 | NaN  | NaN  | 0.95 | 0.95 | NaN  | 0.92 | 0.83 | NaN  |
| G8JLD5 | Dynamin-1-like protein                                                                                                                                | DNM1L  | 592   | S | 1     | 73.98 | 0.97 | 0.99 | 1.09 | NaN  | 1.65 | 1.50 | 0.75 | 0.77 | 0.66 |
| G8JLH9 | Signal transducer and activator of transcription;Signal transducer and activator of transcription 3                                                   | STAT3  | 629   | S | 1     | 131.9 | 1.73 | 1.73 | 1.63 | 1.83 | 1.90 | 2.01 | 0.88 | 0.81 | NaN  |
| H0Y2P0 | CD44 antigen                                                                                                                                          | CD44   | 254   | S | 1     | 108.8 | 1.01 | 1.03 | 0.99 | 0.84 | 0.88 | 0.82 | 1.09 | 1.20 | 1.19 |
| H0Y2V6 | Centrosomal protein of 170 kDa                                                                                                                        | CEP170 | 935   | S | 0.97  | 97.22 | 3.01 | 3.48 | 3.89 | 1.63 | 1.46 | 3.63 | 2.51 | 1.89 | 2.10 |
| H0Y2V6 | Centrosomal protein of 170 kDa                                                                                                                        | CEP170 | 410   | S | 0.949 | 78.79 | 3.25 | 1.83 | NaN  | NaN  | NaN  | NaN  | NaN  | NaN  | NaN  |
| H0Y2V6 | Centrosomal protein of 170 kDa                                                                                                                        | CEP170 | 1043  | S | 0.693 | 43.37 | NaN  | NaN  | NaN  | 1.83 | 2.23 | NaN  | NaN  | NaN  | 0.81 |
| H0Y2V6 | Centrosomal protein of 170 kDa                                                                                                                        | CEP170 | 1495  | S | 0.769 | 97.61 | NaN  | NaN  | NaN  | NaN  | 1.14 | NaN  | 2.37 | 1.79 | NaN  |
| H0Y2V6 | Centrosomal protein of 170 kDa                                                                                                                        | CEP170 | 1496  | S | 0.505 | 42.33 | NaN  | NaN  | NaN  | NaN  | 1.14 | NaN  | 2.37 | 1.79 | NaN  |
| H0Y2V6 | Centrosomal protein of 170 kDa                                                                                                                        | CEP170 | 1503  | S | 1     | 124   | 1.11 | 1.07 | 0.74 | 0.88 | 0.87 | 0.64 | 2.37 | 0.98 | 0.92 |
| H0Y589 | Histone lysine demethylase PHF8                                                                                                                       | PHF8   | 585   | S | 0.968 | 80.06 | NaN  | 1.09 | 0.89 | NaN  | NaN  | NaN  | NaN  | 1.95 | NaN  |
| H0Y449 | Nuclease-sensitive element-binding protein 1                                                                                                          | YBX1   | 364   | S | 0.886 | 188.1 | 1.19 | 1.31 | 1.33 | 1.32 | 1.17 | 1.31 | 1.16 | 1.24 | 1.18 |
| H0Y449 | Nuclease-sensitive element-binding protein 1                                                                                                          | YBX1   | 215   | S | 0.997 | 273.4 | 3.27 | NaN  | NaN  | 1.64 | NaN  | 1.48 | 2.98 | 2.09 | NaN  |
| H0Y449 | Nuclease-sensitive element-binding protein 1                                                                                                          | YBX1   | 224   | S | 0.991 | 315   | 1.58 | 1.59 | NaN  | 1.40 | 1.20 | 1.15 | 1.85 | 1.64 | 1.56 |
| H0Y4R1 | Inosine-5'-monophosphate dehydrogenase 2                                                                                                              | IMPDH2 | 372   | S | 1     | 74.39 | 0.92 | NaN  | NaN  | 1.04 | 1.06 | NaN  | NaN  | NaN  | NaN  |
| H0Y4V9 | La-related protein 4B                                                                                                                                 | LARP4B | 165   | S | 0.827 | 89.68 | NaN  | 1.18 | NaN  | 1.35 | 1.42 | 1.21 | NaN  | 0.99 | 1.21 |
| H0Y4V9 | La-related protein 4B                                                                                                                                 | LARP4B | 167   | S | 0.997 | 104.5 | 0.92 | 0.59 | 1.60 | 1.26 | 1.18 | 1.34 | NaN  | 1.12 | 0.52 |
| H0Y4V9 | La-related protein 4B                                                                                                                                 | LARP4B | 337   | S | 1     | 137.9 | 1.62 | 1.56 | 1.77 | 1.43 | 1.59 | 1.62 | 0.87 | 0.79 | 0.91 |
| H0Y4V9 | La-related protein 4B                                                                                                                                 | LARP4B | 82    | S | 0.557 | 59.3  | NaN  | NaN  | NaN  | NaN  | NaN  | 0.74 | 1.09 | 1.45 | NaN  |
| H0Y4V9 | La-related protein 4B                                                                                                                                 | LARP4B | 90    | S | 0.899 | 143.5 | 0.97 | 1.07 | 1.22 | 1.03 | 1.26 | 1.15 | 1.50 | 1.11 | 1.68 |
| H0Y4Z8 | Rab-like protein 6                                                                                                                                    | RABL6  | 426   | S | 1     | 93.1  | NaN  | NaN  | NaN  | NaN  | NaN  | NaN  | NaN  | 0.65 | 0.95 |
| H0Y4Z8 | Rab-like protein 6                                                                                                                                    | RABL6  | 597   | S | 1     | 150.5 | 1.19 | 1.15 | 1.46 | 1.34 | 1.06 | 1.09 | 1.17 | 1.36 | 1.28 |

|        |                                                         |          |         |   |       |       |      |      |      |      |      |      |      |      |      |
|--------|---------------------------------------------------------|----------|---------|---|-------|-------|------|------|------|------|------|------|------|------|------|
| H0Y4Z8 | Rab-like protein 6                                      | RABL6    | 455     | S | 1     | 74.84 | 1.51 | 0.54 | 1.09 | 0.65 | 0.89 | 1.10 | 1.18 | 0.80 | 1.47 |
| H0Y4Z8 | Rab-like protein 6                                      | RABL6    | 465     | S | 0.981 | 60.62 | 1.51 | 0.54 | NaN  | 0.65 | 0.89 | 1.58 | NaN  | NaN  | 1.23 |
| H0Y4Z8 | Rab-like protein 6                                      | RABL6    | 471     | S | 0.926 | 74.84 | 1.51 | NaN  | 1.09 | NaN  | 1.35 | 1.10 | 1.27 | 0.49 | 1.09 |
| H0Y4Z8 | Rab-like protein 6                                      | RABL6    | 472     | S | 0.943 | 74.84 | 1.51 | NaN  | 1.09 | NaN  | 1.35 | 1.32 | 1.18 | 0.49 | 1.09 |
| H0Y503 | Basic leucine zipper and W2 domain-containing protein 1 | BZW1     | 127     | S | 1     | 173.1 | NaN  | 0.72 | 0.77 | 0.81 | NaN  | 0.71 | 0.68 | 0.58 | 0.63 |
| H0Y507 | SH3 and PX domain-containing protein 2A                 | SH3PXD2A | 474     | S | 1     | 211.1 | 0.76 | NaN  | NaN  | 0.94 | 0.83 | 0.97 | NaN  | NaN  | 0.81 |
| H0Y555 | Proteasome inhibitor PI31 subunit                       | PSMF1    | 13      | S | 0.757 | 72.92 | NaN  | 1.12 | NaN  | 1.27 | 1.18 | NaN  | NaN  | NaN  | NaN  |
| H0Y564 | Anaphase-promoting complex subunit 1                    | ANAPC1   | 221     | S | 0.5   | 48.44 | NaN  | NaN  | NaN  | NaN  | NaN  | NaN  | 0.80 | 0.95 | NaN  |
| H0Y564 | Anaphase-promoting complex subunit 1                    | ANAPC1   | 223     | S | 0.994 | 83.09 | 0.77 | NaN  | NaN  | NaN  | NaN  | 1.07 | 0.74 | 0.83 | NaN  |
| H0Y579 | UV excision repair protein RAD23 homolog B              | RAD23B   | 30      | S | 0.954 | 251.7 | 1.41 | 1.46 | 1.34 | 1.58 | 1.61 | 1.65 | 0.85 | 0.91 | 0.92 |
| H0Y7H7 | Dedicator of cytokinesis protein 4                      | DOCK4    | 1161    | S | 1     | 75.2  | 1.42 | 1.59 | NaN  | 0.89 | NaN  | NaN  | 1.13 | 1.29 | NaN  |
| H0Y5S9 | Casein kinase I isoform                                 | CSNK1E   | 66      | S | 0.5   | 88.16 | 0.79 | NaN  | NaN  | 0.97 | 0.79 | NaN  | 1.06 | 1.00 | 1.01 |
| H0Y626 | Tripartite motif-containing protein 16                  | TRIM16   | 60      | S | 1     | 314.3 | 0.93 | 0.89 | 0.92 | 1.09 | 1.01 | 1.21 | 0.79 | 0.78 | 0.92 |
| H0Y6F5 | Zinc fingers and homeoboxes protein 3                   | ZHX3     | 655     | S | 0.968 | 52.11 | 1.05 | 1.06 | NaN  | NaN  | NaN  | NaN  | 0.97 | 1.15 | NaN  |
| H7BZT5 | Zinc finger protein 185                                 | ZNF185   | 205;449 | S | 0.656 | 158.5 | NaN  | NaN  | NaN  | NaN  | 0.90 | NaN  | NaN  | 1.33 | 1.24 |
| H7BZT5 | Zinc finger protein 185                                 | ZNF185   | 212;456 | S | 1     | 138   | 1.12 | 1.21 | 1.16 | 1.20 | 1.05 | 0.97 | 1.20 | 1.18 | 1.13 |
| H7BZT5 | Zinc finger protein 185                                 | ZNF185   | 278;522 | S | 0.995 | 199.6 | NaN  | 0.71 | 0.89 | NaN  | 0.94 | 1.26 | 0.78 | NaN  | 1.51 |
| H7BZT5 | Zinc finger protein 185                                 | ZNF185   | 224;468 | S | 0.996 | 113.2 | 2.53 | 2.78 | 3.18 | NaN  | NaN  | 2.66 | 4.37 | 5.96 | 3.81 |
| H0Y704 | Zinc finger protein 185                                 | ZNF185   | 23      | S | 1     | 160.5 | NaN  | 0.84 | 0.93 | 0.62 | 0.59 | 0.62 | 0.67 | NaN  | NaN  |
| H0Y7Q2 | Coiled-coil domain-containing protein 132               | CCDC132  | 346     | S | 0.998 | 150.1 | 0.82 | 0.74 | NaN  | 0.91 | NaN  | NaN  | NaN  | NaN  | 0.78 |
| H0Y7W6 | Formin-binding protein 1                                | FNBP1    | 311     | S | 0.997 | 57.35 | 1.10 | 0.93 | NaN  | 1.02 | 0.87 | 1.05 | 1.20 | 1.17 | 1.27 |
| Q96RU3 | Formin-binding protein 1                                | FNBP1    | 258;296 | S | 0.998 | 85.4  | 1.74 | 1.77 | 1.70 | 1.68 | 1.85 | 1.87 | 2.48 | 2.30 | 2.32 |
| H0Y7Y8 | AT-rich interactive domain-containing protein 4B        | ARID4B   | 75      | S | 0.976 | 61.04 | NaN  | 0.30 | NaN  | 0.68 | 0.68 | NaN  | NaN  | 0.43 | NaN  |
| H0Y7Z1 | Fibronectin;Anastellin;Ugl-Y1;Ugl-Y2;Ugl-Y3             | FN1      | 1101    | S | 1     | 188.5 | NaN  | 1.55 | 1.57 | NaN  | NaN  | 1.21 | NaN  | 1.05 | NaN  |
| H0Y8X4 | 2'-deoxynucleoside 5'-phosphate N-hydrolase 1           | DNPH1    | 238     | S | 0.998 | 140.7 | NaN  | 1.25 | 1.25 | 1.76 | 1.80 | 1.35 | 1.10 | 1.00 | 1.05 |
| H0Y9P1 | BMP-2-inducible protein                                 | BMP2K    | 722     | S | 0.842 | 40.01 | 1.53 | 1.26 | NaN  | NaN  | NaN  | NaN  | 1.00 | NaN  | NaN  |
| H0Y9P1 | BMP-2-inducible protein                                 | BMP2K    | 724     | S | 0.856 | 59.51 | 1.53 | 1.26 | NaN  | NaN  | NaN  | NaN  | 1.00 | 1.06 | NaN  |
| H0Y9P1 | BMP-2-inducible protein                                 | BMP2K    | 725     | S | 0.856 | 59.51 | 1.53 | 1.26 | NaN  | NaN  | NaN  | NaN  | 1.00 | 1.06 | NaN  |
| H0Y9P1 | BMP-2-inducible protein                                 | BMP2K    | 640     | S | 0.645 | 99.96 | 1.55 | 1.69 | 1.92 | NaN  | NaN  | NaN  | 1.80 | 1.98 | 2.64 |
| H0Y9T5 | m7GpppN-mRNA hydrolase                                  | DCP2     | 228     | S | 1     | 80.85 | 1.07 | 0.89 | 1.24 | 1.09 | 0.90 | 1.07 | 0.96 | 0.80 | 1.15 |
| H0Y9T5 | m7GpppN-mRNA hydrolase                                  | DCP2     | 229     | S | 1     | 80.85 | 1.07 | 0.89 | 1.24 | 1.09 | 0.90 | 1.07 | 0.96 | 0.80 | 1.15 |
| H0Y9T5 | m7GpppN-mRNA hydrolase                                  | DCP2     | 231     | S | 1     | 80.85 | 1.07 | 0.89 | 1.24 | 1.09 | 0.90 | 1.07 | 0.96 | 0.80 | 1.15 |
| H0YA93 | NEDD4-binding protein 2                                 | N4BP2    | 313     | S | 0.542 | 42.35 | 1.18 | 0.90 | 1.96 | 1.40 | 1.88 | 0.83 | 1.45 | NaN  | NaN  |
| H0YA93 | NEDD4-binding protein 2                                 | N4BP2    | 333     | S | 0.826 | 42.35 | 1.18 | 0.90 | 1.96 | 1.40 | 1.88 | 0.83 | 1.45 | NaN  | NaN  |

|        |                                                         |         |      |   |       |       |      |      |      |      |      |      |      |      |      |
|--------|---------------------------------------------------------|---------|------|---|-------|-------|------|------|------|------|------|------|------|------|------|
| H0YA93 | NEDD4-binding protein 2                                 | N4BP2   | 335  | S | 0.826 | 42.35 | 1.18 | 0.90 | 1.96 | 1.40 | 1.88 | 0.83 | 1.45 | NaN  | NaN  |
| H0YA93 | NEDD4-binding protein 2                                 | N4BP2   | 337  | S | 0.826 | 42.35 | 1.18 | 0.90 | 1.96 | 1.40 | 1.88 | 0.83 | 1.45 | NaN  | NaN  |
| H0YAC7 | Coatomer subunit beta'                                  | COPB2   | 73   | S | 1     | 351.3 | 0.88 | 0.86 | 0.85 | 0.86 | 0.97 | 0.91 | 0.80 | 0.88 | 0.97 |
| H0YAD9 | SH3 domain-binding protein 2                            | SH3BP2  | 120  | S | 1     | 41.54 | 1.26 | NaN  | 1.12 | NaN  | 0.89 | 1.10 | NaN  | NaN  | NaN  |
| H0YAZ3 | Vinexin                                                 | SORBS3  | 42   | S | 0.975 | 184.9 | NaN  | NaN  | 1.91 | 1.70 | 1.72 | 1.77 | 2.10 | 2.22 | 2.38 |
| H0YD46 | DNA polymerase delta subunit 3                          | POLD3   | 31   | S | 1     | 164.5 | 0.51 | 0.56 | NaN  | 0.68 | 0.71 | NaN  | 0.51 | 0.59 | NaN  |
| H0YDM2 | Protein SOGA1;N-terminal form;C-terminal 80 kDa form    | SOGA1   | 869  | S | 1     | 60.34 | NaN  | 0.40 | NaN  | 0.67 | 0.70 | 0.57 | NaN  | 0.87 | NaN  |
| H0YE29 | Rho GTPase-activating protein 1                         | ARHGAP1 | 48   | S | 0.73  | 80.91 | NaN  | NaN  | NaN  | 1.38 | 1.42 | 1.32 | 1.25 | NaN  | NaN  |
| H0YE29 | Rho GTPase-activating protein 1                         | ARHGAP1 | 49   | S | 0.981 | 169.2 | 1.63 | 1.64 | 1.80 | 1.44 | NaN  | 1.38 | 1.20 | 1.20 | 1.24 |
| H0YE35 | Synembryn-A                                             | RIC8A   | 44   | S | 1     | 290.8 | 0.63 | 0.64 | 0.60 | 0.76 | 0.76 | 0.76 | 0.43 | 0.51 | 0.53 |
| H0YE35 | Synembryn-A                                             | RIC8A   | 118  | S | 1     | 51.57 | NaN  | 1.75 | 1.78 | 2.89 | NaN  | NaN  | 1.02 | 1.01 | NaN  |
| H0YGG4 |                                                         | EIF2B1  | 7    | S | 1     | 47.81 | NaN  | NaN  | NaN  | NaN  | NaN  | NaN  | 0.55 | 0.38 | NaN  |
| H0YGI8 | Stress-induced-phosphoprotein 1                         | STIP1   | 80   | S | 1     | 131.1 | 1.60 | 1.59 | 1.45 | 2.64 | 2.61 | 2.43 | 1.02 | 0.99 | 1.02 |
| H0YK04 | Rho GTPase-activating protein 5                         | ARHGAP5 | 96   | S | 0.965 | 186.1 | 1.73 | 1.15 | NaN  | 1.84 | NaN  | NaN  | 1.68 | 1.82 | 1.88 |
| J3KPH4 | Sorting nexin-1                                         | SNX1    | 32   | S | 1     | 161.4 | 1.04 | 1.13 | 1.02 | 1.09 | 1.09 | 1.04 | 1.13 | 1.80 | 1.17 |
| J3KPH4 | Sorting nexin-1                                         | SNX1    | 39   | S | 1     | 198.4 | 1.04 | 1.12 | 1.02 | 1.05 | 1.09 | 1.04 | 0.82 | 0.69 | 1.10 |
| H0YLQ7 | DnaJ homolog subfamily C member 17                      | DNAJC17 | 112  | S | 1     | 218.4 | 0.96 | 0.89 | 0.94 | 0.86 | 0.87 | NaN  | 0.81 | 1.00 | 1.04 |
| H0YM23 | Ankyrin repeat domain-containing protein 17             | ANKRD17 | 1931 | S | 0.982 | 59.98 | NaN  | 0.72 | NaN  | 0.70 | 0.79 | 0.87 | NaN  | 0.98 | NaN  |
| H0YNU8 | Tropomodulin-3                                          | TMOD3   | 25   | S | 0.972 | 91.11 | NaN  | 2.15 | NaN  | 2.26 | 2.15 | NaN  | 1.87 | 1.40 | NaN  |
| H3BLV9 | SRSF protein kinase 1                                   | SRPK1   | 327  | S | 0.96  | 85.93 | 0.99 | 0.84 | NaN  | NaN  | NaN  | NaN  | 0.94 | 0.97 | 0.95 |
| H3BLZ2 |                                                         | DBNDD1  | 7    | S | 0.939 | 81.01 | 1.20 | 1.14 | 1.11 | 1.04 | 1.07 | 1.08 | 1.03 | 1.03 | 1.09 |
| H3BM18 | Gamma-interferon-inducible protein 16                   | IFI16   | 106  | S | 1     | 238.8 | NaN  | 1.47 | 1.16 | 2.15 | 2.07 | 2.16 | 1.20 | 1.16 | 1.33 |
| H3BM18 | Gamma-interferon-inducible protein 16                   | IFI16   | 153  | S | 1     | 183.7 | 0.60 | 0.58 | 0.64 | 0.88 | 0.80 | 0.91 | NaN  | NaN  | 0.55 |
| H3BM38 | Synaptosomal-associated protein 23                      | SNAP23  | 110  | S | 1     | 257.8 | 2.61 | 3.01 | 2.90 | 2.66 | NaN  | 1.78 | 2.20 | 2.07 | 1.78 |
| H3BM89 | 60S ribosomal protein L4                                | RPL4    | 201  | S | 1     | 71.22 | 1.25 | 1.42 | NaN  | NaN  | 1.42 | 1.22 | 0.87 | 0.84 | 1.09 |
| H3BTD3 | cAMP-regulated phosphoprotein 19                        | ARPP19  | 7    | S | 0.765 | 43.3  | 0.73 | 0.67 | NaN  | NaN  | NaN  | NaN  | NaN  | NaN  | NaN  |
| H3BMF6 | Ubiquitin carboxyl-terminal hydrolase 7                 | USP7    | 18   | S | 1     | 118.7 | 0.90 | NaN  | 0.77 | NaN  | 1.02 | 1.04 | NaN  | NaN  | NaN  |
| H3BMI8 | Telomeric repeat-binding factor 2-interacting protein 1 | TERF2IP | 32   | S | 0.966 | 183.3 | NaN  | NaN  | NaN  | 2.02 | NaN  | NaN  | 1.15 | 1.08 | NaN  |
| H3BUL0 | RNA-binding protein with serine-rich domain 1           | RNPS1   | 155  | S | 1     | 61.17 | 0.80 | 0.84 | NaN  | 0.90 | 0.89 | 0.91 | 0.77 | 0.86 | 0.89 |
| H3BUL0 | RNA-binding protein with serine-rich domain 1           | RNPS1   | 157  | S | 0.996 | 61.17 | 0.80 | 0.84 | NaN  | 0.90 | 0.89 | 0.91 | 0.77 | 0.86 | 0.89 |

|        |                                                                 |                    |      |   |       |       |      |      |      |      |      |      |      |      |      |
|--------|-----------------------------------------------------------------|--------------------|------|---|-------|-------|------|------|------|------|------|------|------|------|------|
| H3BN50 |                                                                 | SLC9A3R<br>2       | 20   | S | 1     | 67.87 | 1.61 | 1.65 | 1.64 | 1.34 | 1.39 | 1.39 | 1.40 | 1.34 | 1.46 |
| H3BTK3 | Calcium-regulated heat stable protein 1                         | CARHSP<br>1        | 30   | S | 1     | 154.1 | 0.77 | 0.81 | 0.60 | 0.85 | 0.67 | 0.63 | 0.99 | 0.81 | 0.77 |
| H3BTK3 | Calcium-regulated heat stable protein 1                         | CARHSP<br>1        | 32   | S | 1     | 154.1 | 0.91 | 0.95 | 0.71 | 0.88 | 0.67 | 0.92 | 1.09 | 0.81 | 1.19 |
| H3BTK3 | Calcium-regulated heat stable protein 1                         | CARHSP<br>1        | 41   | S | 0.999 | 119.4 | 2.33 | 2.19 | 2.12 | 2.08 | 2.12 | 2.05 | 2.47 | 2.69 | 2.21 |
| H3BNW0 | THUMP domain-containing protein 1                               | THUMPD<br>1        | 86   | S | 1     | 147.7 | 0.56 | 0.89 | 0.87 | 0.90 | 0.95 | 0.92 | 0.98 | 0.99 | 0.90 |
| H3BNW0 | THUMP domain-containing protein 1                               | THUMPD<br>1        | 88   | S | 1     | 147.7 | 0.81 | 0.89 | 0.49 | 0.90 | 0.95 | 0.92 | 0.65 | 0.96 | 0.90 |
| H3BPG4 | Cytoplasmic tRNA 2-thiolation protein 2                         | CTU2               | 101  | S | 1     | 84.82 | 1.15 | 1.08 | 1.15 | 0.85 | 1.12 | 0.89 | 1.10 | 1.18 | 1.22 |
| H3BUH7 | Fructose-bisphosphate aldolase;Fructose-bisphosphate aldolase A | ALDOA              | 36   | S | 0.921 | 127.7 | 1.12 | 1.46 | NaN  | NaN  | NaN  | NaN  | 1.94 | NaN  | NaN  |
| H3BTD6 | Enhancer of mRNA-decapping protein 3                            | EDC3               | 18   | S | 1     | 173   | 1.14 | 1.23 | 1.06 | 1.39 | 1.16 | 1.24 | 1.26 | 1.06 | 1.33 |
| H3BPZ1 | Very-long-chain (3R)-3-hydroxyacyl-CoA dehydratase              | HACD3              | 89   | S | 1     | 123   | 1.35 | 1.59 | 1.43 | 1.36 | 1.19 | 1.35 | 0.79 | 0.79 | 0.62 |
| H3BRT8 | Dual specificity protein kinase CLK3                            | CLK3               | 76   | S | 0.958 | 57.07 | 0.69 | 0.64 | NaN  | 0.65 | 0.98 | NaN  | NaN  | 0.93 | NaN  |
| H3BRT8 | Dual specificity protein kinase CLK3                            | CLK3               | 9    | S | 0.975 | 55.84 | 1.13 | 1.13 | NaN  | NaN  | NaN  | NaN  | 1.14 | NaN  | NaN  |
| H3BQK9 | Microtubule-actin cross-linking factor 1, isoforms 1/2/3/5      | MACF1              | 4553 | S | 1     | 157.4 | 0.63 | 0.68 | 0.69 | 1.24 | 0.98 | 1.03 | 0.98 | 0.92 | 0.91 |
| H3BQK9 | Microtubule-actin cross-linking factor 1, isoforms 1/2/3/5      | MACF1              | 4527 | S | 0.564 | 108.5 | NaN  | NaN  | NaN  | NaN  | NaN  | NaN  | 0.49 | NaN  | 0.42 |
| H3BQK9 | Microtubule-actin cross-linking factor 1, isoforms 1/2/3/5      | MACF1              | 4528 | S | 0.995 | 195.4 | 0.38 | NaN  | NaN  | 0.83 | 0.86 | 0.68 | 0.36 | 0.35 | NaN  |
| H3BQZ7 | Heterogeneous nuclear ribonucleoprotein U-like protein 2        | HNRNPU<br>L2-BSCL2 | 161  | S | 1     | 304.8 | 0.98 | 0.92 | 0.92 | 0.99 | 0.93 | 0.97 | 1.09 | 0.98 | 1.10 |
| H3BQZ7 | Heterogeneous nuclear ribonucleoprotein U-like protein 2        | HNRNPU<br>L2-BSCL2 | 226  | S | 0.696 | 220.2 | 0.45 | 0.45 | NaN  | 0.56 | 0.63 | NaN  | NaN  | 0.71 | 0.55 |
| H3BQZ7 | Heterogeneous nuclear ribonucleoprotein U-like protein 2        | HNRNPU<br>L2-BSCL2 | 228  | S | 0.832 | 200.5 | 0.45 | 0.45 | NaN  | NaN  | NaN  | NaN  | 0.67 | NaN  | NaN  |
| H3BRM1 | Abscission/NoCut checkpoint regulator                           | ZFYVE19            | 262  | S | 1     | 213   | 0.93 | 1.05 | 0.84 | 0.97 | 0.88 | 0.80 | 1.09 | 1.22 | 0.99 |
| H3BRM1 | Abscission/NoCut checkpoint regulator                           | ZFYVE19            | 115  | S | 1     | 74.46 | 0.83 | 0.69 | 0.82 | NaN  | 0.79 | 0.76 | 0.87 | 0.97 | 1.11 |
| H3BRG5 | STAR-related lipid transfer protein 13                          | STARD13            | 299  | S | 1     | 43.52 | NaN  | 0.84 | 1.17 | NaN  | NaN  | NaN  | NaN  | NaN  | NaN  |



|        |                                                     |         |         |   |       |       |      |      |      |      |      |      |      |      |      |
|--------|-----------------------------------------------------|---------|---------|---|-------|-------|------|------|------|------|------|------|------|------|------|
| H3BRG5 | StAR-related lipid transfer protein 13              | STARD13 | 118     | S | 1     | 109.1 | 1.25 | 1.07 | 1.04 | 0.93 | 0.89 | 0.93 | 1.00 | 1.17 | NaN  |
| H3BS42 | Zinc finger protein 768                             | ZNF768  | 52      | S | 0.782 | 42    | NaN  | NaN  | NaN  | NaN  | 0.84 | NaN  | 1.05 | 0.90 | 1.04 |
| H3BS86 | E3 ubiquitin-protein ligase                         | STUB1   | 19      | S | 1     | 183   | 0.68 | 0.72 | 0.68 | 0.71 | 0.81 | 0.78 | 0.77 | 0.79 | 0.83 |
| H3BS86 | E3 ubiquitin-protein ligase                         | STUB1   | 23      | S | 0.981 | 81.32 | 0.90 | 1.29 | 1.52 | 1.24 | NaN  | 1.59 | 1.03 | NaN  | NaN  |
| H3BTX0 | PAXIP1-associated glutamate-rich protein 1          | PAGR1   | 67      | S | 1     | 194.9 | 0.96 | 1.16 | 1.29 | 1.09 | 1.20 | NaN  | 1.24 | 1.20 | 1.48 |
| J3QLT7 | Nucleolar protein 3                                 | NOL3    | 70      | S | 0.572 | 99.89 | NaN  | 0.80 | 0.85 | NaN  | NaN  | NaN  | 0.83 | NaN  | NaN  |
| H3BUV9 | Ubiquitin-like protein 7                            | UBL7    | 174     | S | 1     | 260.8 | 0.80 | 0.97 | NaN  | 0.83 | NaN  | 0.10 | 0.95 | 0.88 | NaN  |
| P29590 | Protein PML                                         | PML     | 162;518 | S | 1     | 154.8 | 0.50 | 0.46 | 0.57 | 0.61 | 0.51 | 0.51 | 0.74 | 0.82 | 0.92 |
| P29590 | Protein PML                                         | PML     | 171;527 | S | 1     | 154.8 | 0.63 | 0.54 | 0.82 | 0.69 | 0.79 | 0.82 | 1.07 | 1.25 | 1.44 |
| P29590 | Protein PML                                         | PML     | 174;530 | S | 1     | 169.7 | 1.47 | NaN  | 1.41 | NaN  | 1.16 | 1.23 | 1.63 | NaN  | 1.64 |
| P29590 | Protein PML                                         | PML     | 47;403  | S | 0.999 | 88.67 | 0.94 | 1.04 | 1.03 | 1.60 | NaN  | 1.28 | 1.25 | 1.15 | 1.05 |
| P29590 | Protein PML                                         | PML     | 149;505 | S | 0.987 | 116.9 | 0.82 | 0.85 | 0.88 | 0.87 | 0.90 | 0.89 | 1.22 | 1.16 | 1.20 |
| H7BZX1 | Sorbin and SH3 domain-containing protein 2          | SORBS2  | 224     | S | 0.989 | 71.14 | 0.37 | 0.36 | 0.52 | 0.61 | NaN  | NaN  | NaN  | NaN  | NaN  |
| H7BZ88 | Signal transducer and activator of transcription 1- | STAT1   | 17      | S | 1     | 96.05 | 1.34 | 1.34 | 1.48 | 1.96 | 1.96 | 1.63 | 0.67 | 0.69 | NaN  |
| H7BZT5 | Zinc finger protein 185                             | ZNF185  | 153     | S | 0.77  | 138.1 | 1.69 | NaN  | NaN  | NaN  | NaN  | NaN  | 1.79 | 1.85 | NaN  |
| H7BZZ1 | HCLS1-binding protein 3                             | HS1BP3  | 13      | S | 1     | 190.7 | 0.80 | 0.87 | 1.20 | 1.25 | 1.38 | 0.81 | 1.03 | 0.99 | 1.04 |
| H7BZZ1 | HCLS1-binding protein 3                             | HS1BP3  | 68      | S | 1     | 115   | 0.72 | 0.85 | 0.76 | 0.85 | 0.91 | 0.71 | 0.81 | 0.75 | 0.81 |
| H7BZZ6 | Serine/arginine-rich splicing factor 7              | SRSF7   | 103     | S | 1     | 81.88 | 0.95 | 0.98 | 0.99 | 1.04 | 1.05 | 1.10 | NaN  | 0.84 | 0.87 |
| H7BZZ6 | Serine/arginine-rich splicing factor 7              | SRSF7   | 105     | S | 1     | 81.88 | 0.26 | 0.25 | 0.27 | 0.39 | 0.40 | 0.38 | NaN  | 0.17 | 0.87 |
| H7BZZ6 | Serine/arginine-rich splicing factor 7              | SRSF7   | 76      | S | 0.994 | 97.74 | 1.03 | 1.17 | 0.31 | 0.28 | 1.00 | 1.12 | 0.29 | 1.03 | 0.30 |
| H7BZZ6 | Serine/arginine-rich splicing factor 7              | SRSF7   | 78      | S | 0.993 | 66.96 | 1.03 | 1.17 | 1.07 | 1.06 | 1.00 | 1.12 | 1.11 | 0.30 | 1.14 |
| H7C072 | THO complex subunit 5 homolog                       | THOC5   | 183     | S | 1     | 187.3 | 0.86 | 0.77 | 0.76 | 0.91 | 0.76 | 0.81 | 1.23 | 0.82 | 1.03 |
| H7C072 | THO complex subunit 5 homolog                       | THOC5   | 185     | S | 1     | 187.3 | 0.86 | 0.77 | 0.76 | 0.91 | 0.76 | 0.81 | 1.23 | 0.82 | 1.03 |
| H7C0X8 | Macrophage-capping protein                          | CAPG    | 92      | S | 0.999 | 55.16 | 0.93 | 1.26 | NaN  | 2.28 | NaN  | NaN  | 0.68 | NaN  | NaN  |
| H7C113 | Phospholipid-transporting ATPase IG                 | ATP11C  | 159     | S | 0.845 | 56.21 | 1.20 | 1.63 | NaN  | NaN  | NaN  | NaN  | 0.92 | 0.87 | NaN  |
| H7C1Q8 | DIS3-like exonuclease 2 Ras-specific guanine        | DIS3L2  | 156     | S | 1     | 116.8 | 0.86 | NaN  | 0.75 | 0.78 | NaN  | 0.66 | NaN  | NaN  | 0.89 |
| H7C2H2 | nucleotide-releasing factor                         | RALGPS2 | 67      | S | 1     | 115   | 0.69 | 0.58 | 0.68 | 0.95 | 1.13 | NaN  | 0.95 | 0.86 | NaN  |
| J3KQW3 | RalGPS2                                             |         |         |   |       |       |      |      |      |      |      |      |      |      |      |
| J3KQW3 | Transmembrane protein 44                            | TMEM44  | 194     | S | 0.994 | 60.02 | 0.85 | 0.83 | NaN  | 1.03 | 0.99 | 0.98 | 0.93 | 0.96 | 1.17 |
| H7C409 | Bromodomain and WD repeat-containing protein 1      | BRWD1   | 413     | S | 0.813 | 47.6  | NaN  | NaN  | NaN  | 0.89 | NaN  | 0.68 | 1.14 | NaN  | NaN  |
| H7C4B6 | Transcription regulator protein BACH1               | BACH1   | 11      | S | 0.981 | 47.56 | NaN  | NaN  | 1.53 | NaN  | 1.65 | 1.56 | NaN  | NaN  | NaN  |

|        |                                                                 |             |     |   |       |       |      |      |      |      |      |      |      |      |      |
|--------|-----------------------------------------------------------------|-------------|-----|---|-------|-------|------|------|------|------|------|------|------|------|------|
| I1E4Y6 | PERQ amino acid-rich with<br>GYF domain-containing<br>protein 2 | GIGYF2      | 26  | S | 0.966 | 146.9 | 1.85 | 1.69 | 1.62 | 1.69 | 2.08 | 1.87 | 1.40 | 1.44 | 1.67 |
| I1E4Y6 | PERQ amino acid-rich with<br>GYF domain-containing<br>protein 2 | GIGYF2      | 258 | S | 1     | 55.98 | 1.27 | 1.21 | NaN  | 1.08 | 1.26 | NaN  | NaN  | NaN  | NaN  |
| I3L0L0 | Coiled-coil domain-containing<br>protein 137                    | RUNX2       | 419 | S | 0.682 | 141.5 | NaN  | NaN  | NaN  | 1.00 | NaN  | NaN  | 0.82 | 0.83 | NaN  |
| I3L4F6 | Unconventional prefoldin<br>RPB5 interactor 1                   | CCDC137     | 18  | S | 1     | 69.28 | NaN  | 1.44 | 1.51 | NaN  | NaN  | NaN  | 0.99 | NaN  | NaN  |
| I3L467 | B-cell CLL/lymphoma 7 protein<br>family member C                | URI1        | 16  | S | 0.842 | 46.98 | NaN  | NaN  | NaN  | 0.89 | NaN  | NaN  | 0.60 | 0.82 | NaN  |
| I3L1Q2 | B-cell CLL/lymphoma 7 protein<br>family member C                | BCL7C       | 114 | S | 0.985 | 84.66 | 0.82 | 1.07 | 1.18 | 0.71 | 0.81 | NaN  | NaN  | NaN  | NaN  |
| I3L1Q2 | B-cell CLL/lymphoma 7 protein<br>family member C                | BCL7C       | 122 | S | 0.561 | 98.74 | 0.94 | NaN  | 1.30 | NaN  | NaN  | NaN  | NaN  | NaN  | NaN  |
| I3L1Q2 | B-cell CLL/lymphoma 7 protein<br>family member C                | BCL7C       | 126 | S | 0.993 | 172.2 | 0.82 | 1.18 | 1.18 | 1.63 | 0.81 | NaN  | 1.10 | 1.05 | 0.80 |
| I3L4I0 | FLYWCH family member 2                                          | FLYWCH<br>2 | 21  | S | 0.985 | 56.3  | 1.18 | NaN  | 0.72 | NaN  | 1.58 | 1.32 | NaN  | NaN  | 0.98 |
| I3L436 | Regulatory-associated protein<br>of mTOR                        | RPTOR       | 37  | S | 0.984 | 106.8 | 0.57 | 0.52 | 0.61 | NaN  | NaN  | 0.62 | NaN  | NaN  | 0.83 |
| I3L436 | Regulatory-associated protein<br>of mTOR                        | RPTOR       | 23  | S | 0.998 | 254.8 | 0.69 | 0.62 | 0.70 | 0.69 | 0.70 | 0.71 | 0.88 | 1.05 | 1.21 |
| I3L4J1 | Vacuolar protein sorting-<br>associated protein 4A              | VPS4A       | 119 | S | 0.839 | 53.2  | NaN  | NaN  | 0.96 | 0.97 | 0.85 | 0.84 | 0.94 | 1.11 | 1.09 |
| I3L4J1 | Vacuolar protein sorting-<br>associated protein 4A              | VPS4A       | 121 | S | 0.97  | 53.2  | NaN  | NaN  | 0.96 | 0.97 | 0.85 | 0.84 | 0.94 | 1.11 | 1.09 |
| J3KNG6 | Protein spire homolog 1                                         | SPIRE1      | 467 | S | 0.936 | 63.71 | NaN  | NaN  | 0.87 | NaN  | NaN  | 1.07 | 1.03 | 0.97 | NaN  |
| J3KNN7 | BRCA1-associated protein                                        | BRAP        | 87  | S | 0.994 | 151.4 | 0.88 | NaN  | 1.04 | 1.12 | 1.03 | 0.95 | 0.96 | 1.01 | 0.93 |
| J3KR72 | Transcription initiation factor<br>TFIID subunit 6              | TAF6        | 710 | S | 1     | 99.71 | NaN  | NaN  | NaN  | NaN  | 0.93 | NaN  | 0.94 | 0.77 | NaN  |
| J3KRY8 | Tether containing UBX domain<br>for GLUT4                       | ASPSCR1     | 331 | S | 0.727 | 71.55 | NaN  | NaN  | NaN  | 3.30 | 2.26 | NaN  | NaN  | NaN  | NaN  |
| J3KRY8 | Tether containing UBX domain<br>for GLUT4                       | ASPSCR1     | 104 | S | 0.933 | 65.41 | 1.50 | 1.50 | 1.69 | 2.66 | 1.97 | 2.65 | 0.92 | 0.92 | NaN  |
| J3QLL0 | Importin subunit alpha-1                                        | KPNA2       | 62  | S | 0.966 | 214.5 | 2.32 | 2.27 | 2.46 | 3.99 | 3.97 | 4.44 | 0.84 | 0.93 | NaN  |
| J3KSG3 | ADP-ribosylation factor-<br>binding protein GGA3                | GGA3        | 37  | S | 1     | 77.19 | 1.29 | 1.05 | 1.29 | 0.91 | 1.08 | 1.29 | 0.90 | 1.09 | 1.04 |
| J3KSI3 | E3 ubiquitin-protein ligase<br>rififylin                        | RFFL        | 89  | S | 0.967 | 83.22 | 1.23 | NaN  | NaN  | NaN  | 0.89 | NaN  | 1.23 | NaN  | 1.24 |
| J3KSI3 | E3 ubiquitin-protein ligase<br>rififylin                        | RFFL        | 92  | S | 0.942 | 83.22 | 1.23 | NaN  | NaN  | NaN  | NaN  | NaN  | 1.23 | NaN  | 1.24 |
| J3KSR8 | Serine/arginine-rich splicing<br>factor 1                       | SRSF1       | 94  | S | 1     | 158.5 | 0.75 | 0.76 | 0.78 | 0.75 | 0.75 | 0.75 | 0.70 | 0.67 | 0.75 |
| J3KSR8 | Serine/arginine-rich splicing<br>factor 1                       | SRSF1       | 96  | S | 0.983 | 65.63 | 1.26 | 1.38 | 1.27 | 1.48 | 1.34 | 1.27 | 1.45 | 1.29 | 1.54 |

|        |                                                                                                                                                                                |          |     |   |       |       |      |      |      |      |      |      |      |      |      |
|--------|--------------------------------------------------------------------------------------------------------------------------------------------------------------------------------|----------|-----|---|-------|-------|------|------|------|------|------|------|------|------|------|
| J3KSR8 | Serine/arginine-rich splicing factor 1                                                                                                                                         | SRSF1    | 100 | S | 0.993 | 65.63 | NaN  | NaN  | 1.36 | NaN  | 1.22 | 1.23 | 1.74 | 1.39 | 1.54 |
| J3KSY7 | Protein CASC3                                                                                                                                                                  | CASC3    | 35  | S | 1     | 270.2 | 0.82 | 0.81 | 0.80 | 0.71 | 0.73 | 0.72 | 1.00 | 0.95 | 1.04 |
| J3KTD8 |                                                                                                                                                                                | CBFB     | 46  | S | 0.992 | 78.76 | NaN  | 1.34 | 1.19 | NaN  | NaN  | 1.08 | 1.42 | 1.31 | 1.42 |
| J3QK89 | Calcium homeostasis endoplasmic reticulum protein                                                                                                                              | CHERP    | 826 | S | 0.995 | 107   | 0.85 | 1.03 | 1.03 | NaN  | 0.99 | NaN  | 1.13 | 1.07 | 1.13 |
| J3QK89 | Calcium homeostasis endoplasmic reticulum protein                                                                                                                              | CHERP    | 828 | S | 0.996 | 107   | 0.85 | 1.03 | 1.03 | NaN  | 0.99 | NaN  | 1.13 | 1.07 | 1.13 |
| J3QK89 | Calcium homeostasis endoplasmic reticulum protein                                                                                                                              | CHERP    | 824 | S | 0.998 | 82.77 | NaN  | 1.00 | 1.06 | NaN  | 0.87 | NaN  | NaN  | NaN  | 1.08 |
| J3QQN1 | Proteasome subunit beta type-10                                                                                                                                                | PSMB10   | 110 | S | 0.917 | 61.42 | 1.23 | NaN  | NaN  | NaN  | 1.08 | 0.78 | NaN  | NaN  | 0.91 |
| J3QQQ3 | Zinc finger protein 830                                                                                                                                                        | ZNF830   | 85  | S | 1     | 161.7 | 1.07 | 1.03 | NaN  | 1.33 | 1.22 | NaN  | 1.19 | 1.41 | 1.70 |
| J3QR07 | YTH domain-containing protein 1                                                                                                                                                | YTHDC1   | 308 | S | 1     | 165.6 | NaN  | NaN  | 1.15 | 0.67 | 0.68 | NaN  | 0.77 | 0.84 | NaN  |
| J3QRP6 | Na(+)/H(+) exchange regulatory cofactor NHE-RF1                                                                                                                                | SLC9A3R1 | 161 | S | 1     | 163.8 | 4.92 | 4.60 | 4.90 | 4.45 | 4.74 | 4.85 | 2.65 | NaN  | 2.93 |
| J3QRP6 | Na(+)/H(+) exchange regulatory cofactor NHE-RF1                                                                                                                                | SLC9A3R1 | 169 | S | 0.609 | 114.9 | 0.83 | NaN  | NaN  | NaN  | NaN  | NaN  | 0.94 | 0.89 | NaN  |
| J3QRP6 | Na(+)/H(+) exchange regulatory cofactor NHE-RF1                                                                                                                                | SLC9A3R1 | 171 | S | 0.999 | 350.6 | 0.79 | 0.90 | 0.70 | 0.89 | 0.80 | 0.93 | 0.88 | 1.29 | 0.77 |
| J3QSD7 | Cyclin-dependent kinase 12                                                                                                                                                     | CDK12    | 680 | S | 1     | 78.41 | 0.92 | 0.54 | 0.80 | 1.08 | 1.13 | NaN  | 0.80 | 0.90 | 0.87 |
| J3QSD7 | Cyclin-dependent kinase 12 cAMP-dependent protein kinase type I-alpha regulatory subunit;cAMP-dependent protein kinase type I-alpha regulatory subunit, N-terminally processed | CDK12    | 684 | S | 1     | 78.41 | 0.92 | 0.87 | 0.80 | 1.08 | 1.13 | NaN  | 1.12 | 0.90 | 0.87 |
| K7EMU2 | Formin-like protein 1                                                                                                                                                          | PRKAR1A  | 83  | S | 1     | 150.1 | 0.85 | 0.86 | 0.72 | 0.87 | 0.87 | 0.85 | 0.94 | 0.96 | 1.02 |
| K7ERL1 |                                                                                                                                                                                | FMNL1    | 64  | S | 1     | 180.9 | 0.87 | 0.85 | 0.87 | 0.87 | 0.94 | 0.88 | 1.00 | 1.00 | 0.90 |
| K7EQ06 |                                                                                                                                                                                | HDGFRP2  | 12  | S | 0.936 | 109.6 | 1.36 | 1.28 | 0.85 | NaN  | NaN  | 0.88 | NaN  | NaN  | 1.16 |
| K7EKZ3 | Vacuolar protein sorting-associated protein 4B                                                                                                                                 | VPS4B    | 102 | S | 1     | 195.1 | 0.94 | 0.89 | 0.85 | 0.90 | 0.81 | 0.88 | 0.99 | 0.94 | 0.85 |
| K7EL01 | F-box/WD repeat-containing protein 9                                                                                                                                           | FBXW9    | 18  | S | 1     | 188.9 | NaN  | 0.50 | 0.64 | 0.40 | NaN  | 0.68 | 0.82 | NaN  | 1.26 |
| K7EL60 | Eukaryotic translation initiation factor 3 subunit G                                                                                                                           | EIF3G    | 42  | S | 0.897 | 174.4 | 1.32 | 1.37 | 1.42 | 1.24 | 2.15 | 1.23 | 1.04 | 1.33 | 1.04 |
| K7ENR9 | DNA ligase 3                                                                                                                                                                   | LIG3     | 123 | S | 0.763 | 130.2 | 0.66 | 0.62 | 0.57 | 1.03 | 1.08 | NaN  | 0.59 | 0.69 | 0.68 |
| K7EQA1 | Programmed cell death protein 5                                                                                                                                                | PDCD5    | 81  | S | 1     | 179.6 | 1.05 | 1.27 | 1.06 | 1.26 | 1.32 | 1.24 | 0.74 | 0.70 | 0.73 |
| K7EQI9 | Protein FAM134C                                                                                                                                                                | FAM134C  | 216 | S | 0.995 | 54.33 | NaN  | NaN  | 1.24 | 1.14 | 1.20 | NaN  | 1.12 | 1.17 | NaN  |
| K7EQI9 | Protein FAM134C                                                                                                                                                                | FAM134C  | 223 | S | 1     | 267   | 1.03 | 0.97 | 0.92 | 0.86 | 1.20 | 0.82 | 0.98 | 1.02 | 1.00 |
| K7EQI9 | Protein FAM134C                                                                                                                                                                | FAM134C  | 336 | S | 0.942 | 126.2 | 2.25 | 2.32 | NaN  | NaN  | 1.89 | NaN  | NaN  | 1.64 | NaN  |
| K7EQI9 | Protein FAM134C                                                                                                                                                                | FAM134C  | 338 | S | 0.942 | 177.1 | 2.25 | 2.32 | NaN  | NaN  | 1.89 | NaN  | NaN  | 1.64 | NaN  |
| K7EQI9 | Protein FAM134C                                                                                                                                                                | FAM134C  | 339 | S | 0.672 | 177.1 | 2.25 | 2.32 | NaN  | NaN  | NaN  | NaN  | NaN  | 1.64 | NaN  |

|        |                                                                                                 |         |      |   |       |       |      |      |      |      |      |      |      |      |      |
|--------|-------------------------------------------------------------------------------------------------|---------|------|---|-------|-------|------|------|------|------|------|------|------|------|------|
| K7ER94 | FH1/FH2 domain-containing protein 3                                                             | FHOD3   | 541  | S | 1     | 166.6 | 0.61 | 0.37 | 0.47 | 0.62 | NaN  | 0.53 | 1.66 | 0.71 | 0.76 |
| K7ERB6 | Homologous-pairing protein 2 homolog                                                            | PSMC3IP | 131  | S | 0.908 | 61.99 | NaN  | NaN  | NaN  | NaN  | NaN  | NaN  | 1.56 | 1.08 | NaN  |
| K7ERU2 | KN motif and ankyrin repeat domain-containing protein 2                                         | KANK2   | 98   | S | 1     | 88.55 | 1.72 | 1.45 | 1.70 | 1.47 | 1.64 | 1.50 | 1.11 | 1.09 | 1.07 |
| K7ERU2 | KN motif and ankyrin repeat domain-containing protein 2                                         | KANK2   | 46   | S | 0.999 | 119.8 | 1.57 | 2.02 | NaN  | 1.83 | 1.68 | 1.61 | NaN  | 0.97 | NaN  |
| M0QXN5 | Nuclear pore glycoprotein p62                                                                   | NUP62   | 332  | S | 1     | 179.2 | 1.35 | NaN  | NaN  | 1.59 | 1.72 | NaN  | 1.07 | 0.83 | NaN  |
| M0QYF9 | Homer protein homolog 3                                                                         | HOMER3  | 47   | S | 1     | 69.15 | NaN  | NaN  | NaN  | NaN  | NaN  | NaN  | 1.39 | 1.48 | 2.12 |
| M0QZ09 | NAD-dependent protein deacetylase sirtuin-6                                                     | SIRT6   | 264  | S | 0.823 | 53.98 | 1.24 | 1.11 | 1.39 | 1.05 | NaN  | NaN  | NaN  | NaN  | NaN  |
| M0QZR4 | Rho guanine nucleotide exchange factor 1                                                        | ARHGEF1 | 919  | S | 1     | 100.8 | NaN  | NaN  | NaN  | 2.71 | 2.86 | NaN  | 0.98 | 0.90 | NaN  |
| M0R2H7 | Cdc42-interacting protein 4                                                                     | TRIP10  | 296  | S | 0.999 | 164.8 | 0.97 | 0.98 | 0.95 | 0.94 | 0.94 | 0.80 | 1.70 | 1.70 | 1.49 |
| M0R0P8 | Unconventional myosin-IXb                                                                       | MYO9B   | 717  | S | 0.898 | 115.5 | 0.84 | 0.89 | 0.87 | 1.28 | 1.36 | 1.08 | 0.71 | 0.60 | 0.73 |
| M0R0P8 | Unconventional myosin-IXb                                                                       | MYO9B   | 1122 | S | 1     | 76.21 | 0.68 | NaN  | 0.54 | 0.82 | 0.60 | 0.55 | 0.78 | 0.85 | 0.74 |
| M0R0P8 | Unconventional myosin-IXb                                                                       | MYO9B   | 1405 | S | 0.993 | 89.4  | NaN  | 0.45 | NaN  | 0.62 | 0.58 | 0.54 | NaN  | NaN  | NaN  |
| M0R0P8 | Unconventional myosin-IXb                                                                       | MYO9B   | 1935 | S | 1     | 124.1 | 0.83 | 0.82 | 1.25 | 1.25 | 1.25 | 1.31 | 0.72 | 0.86 | 0.83 |
| M0R0P8 | Unconventional myosin-IXb                                                                       | MYO9B   | 1115 | S | 0.538 | 76.21 | NaN  | NaN  | 0.54 | 0.71 | 0.60 | 0.55 | NaN  | 0.85 | 0.74 |
| M0R0P8 | Unconventional myosin-IXb Receptor protein-tyrosine kinase;Tyrosine-protein kinase receptor UFO | MYO9B   | 1290 | S | 1     | 214.3 | 0.47 | 0.48 | 0.51 | 0.59 | 0.47 | 0.62 | 0.85 | 0.80 | 0.77 |
| M0R0W6 | kinase;Tyrosine-protein kinase receptor UFO                                                     | AXL     | 616  | S | 0.983 | 72.88 | NaN  | 0.61 | NaN  | NaN  | NaN  | NaN  | 1.30 | NaN  | 1.03 |
| M0R2S2 | Epidermal growth factor receptor substrate 15-like 1                                            | EPS15L1 | 101  | S | 0.999 | 317.3 | 0.99 | 1.08 | 1.27 | 1.13 | 0.98 | 1.06 | 1.10 | 1.11 | 1.02 |
| M0R2S2 | Epidermal growth factor receptor substrate 15-like 1                                            | EPS15L1 | 75   | S | 1     | 129.3 | 1.64 | 1.68 | 1.72 | 1.65 | 1.72 | 1.69 | 1.00 | 0.98 | 1.11 |
| O00203 | AP-3 complex subunit beta-1                                                                     | AP3B1   | 276  | S | 1     | 229.7 | 1.00 | 1.01 | 1.05 | 1.15 | 1.18 | 1.00 | 1.08 | 1.15 | 1.08 |
| O00264 | Membrane-associated progesterone receptor component 1                                           | PGRMC1  | 181  | S | 1     | 414.9 | 0.95 | 0.98 | 1.00 | 0.93 | 0.95 | 1.05 | 1.04 | 1.07 | 1.16 |
| O00264 | Membrane-associated progesterone receptor component 1                                           | PGRMC1  | 54   | S | 0.949 | 118.2 | NaN  | NaN  | NaN  | 1.00 | 0.96 | NaN  | NaN  | 1.10 | 1.14 |
| O00264 | Membrane-associated progesterone receptor component 1                                           | PGRMC1  | 57   | S | 1     | 322.5 | 1.00 | 1.26 | 0.99 | 1.13 | 1.12 | 0.98 | 1.14 | 1.06 | 1.12 |
| O00273 | DNA fragmentation factor subunit alpha                                                          | DFFA    | 315  | S | 0.998 | 134.8 | 0.76 | 0.81 | NaN  | 1.49 | 1.33 | 1.05 | 1.38 | 1.42 | 0.98 |
| O00303 | Eukaryotic translation initiation factor 3 subunit F                                            | EIF3F   | 258  | S | 1     | 106.9 | 1.03 | 1.03 | 0.99 | 1.28 | 1.37 | 1.20 | 1.14 | 0.97 | 0.98 |
| O00308 | NEDD4-like E3 ubiquitin-protein ligase WWP2                                                     | WWP2    | 211  | S | 0.991 | 84.95 | 1.00 | 0.86 | 1.06 | 0.84 | NaN  | 3.13 | 4.01 | 4.20 | 1.44 |
| O00425 | Insulin-like growth factor 2 mRNA-binding protein 3                                             | IGF2BP3 | 184  | S | 0.999 | 49.03 | 0.95 | NaN  | 0.98 | 0.89 | NaN  | NaN  | 1.05 | NaN  | NaN  |

|        |                                                             |            |      |   |       |       |      |      |      |      |      |      |      |      |      |
|--------|-------------------------------------------------------------|------------|------|---|-------|-------|------|------|------|------|------|------|------|------|------|
| O00499 | Myc box-dependent-interacting protein 1                     | BIN1       | 296  | S | 1     | 102.6 | 1.23 | 2.38 | 1.01 | 0.80 | 0.85 | 0.84 | 1.53 | 0.87 | 0.87 |
| O00499 | Myc box-dependent-interacting protein 1                     | BIN1       | 298  | S | 1     | 182.2 | 1.05 | 0.97 | 0.93 | 1.04 | 0.92 | 0.94 | 1.12 | 1.20 | 1.13 |
| O00499 | Myc box-dependent-interacting protein 1                     | BIN1       | 303  | S | 1     | 136.4 | 1.23 | 2.38 | 1.58 | 1.32 | 0.85 | NaN  | 1.46 | 1.08 | 0.78 |
| O00505 | Importin subunit alpha-4 U3 small nucleolar                 | KPNA3      | 60   | S | 1     | 226.2 | 1.73 | 1.81 | 1.81 | 1.36 | 1.36 | 1.40 | 1.91 | 2.09 | 2.03 |
| U3KQ48 | ribonucleoprotein protein MPP10                             | MPHOSP H10 | 163  | S | 1     | 160.1 | 0.76 | 0.68 | 0.83 | 0.76 | 0.90 | 0.97 | 0.65 | 0.48 | 1.17 |
| U3KQ48 | ribonucleoprotein protein MPP10                             | MPHOSP H10 | 167  | S | 1     | 160.1 | 0.76 | 0.68 | 0.83 | 0.76 | 0.90 | 0.97 | 0.65 | 0.48 | 1.17 |
| U3KQ48 | ribonucleoprotein protein MPP10                             | MPHOSP H10 | 171  | S | 1     | 122.5 | 1.05 | 1.03 | 0.83 | 1.02 | 1.01 | 0.97 | 1.19 | 1.14 | 1.17 |
| O00567 | Nucleolar protein 56                                        | NOP56      | 519  | S | 1     | 142.3 | 0.93 | 0.99 | 0.93 | 1.22 | NaN  | 0.92 | 0.70 | 1.05 | 1.14 |
| O00567 | Nucleolar protein 56                                        | NOP56      | 520  | S | 1     | 178.5 | 0.74 | 0.96 | 0.82 | 0.97 | 1.23 | 0.96 | 0.85 | 0.92 | 0.87 |
| O00567 | Nucleolar protein 56                                        | NOP56      | 569  | S | 1     | 63.73 | 0.76 | 1.22 | NaN  | NaN  | NaN  | NaN  | NaN  | NaN  | NaN  |
| O00567 | Nucleolar protein 56                                        | NOP56      | 570  | S | 1     | 106.4 | 1.57 | NaN  | NaN  | 1.44 | NaN  | NaN  | 0.98 | NaN  | 1.24 |
| O14497 | AT-rich interactive domain-containing protein 1A            | ARID1A     | 696  | S | 0.998 | 104.2 | 1.21 | 1.09 | NaN  | 1.92 | 1.44 | 1.14 | NaN  | 1.29 | NaN  |
| O14497 | AT-rich interactive domain-containing protein 1A            | ARID1A     | 1600 | S | 0.896 | 78.79 | NaN  | NaN  | NaN  | NaN  | NaN  | NaN  | 0.33 | 0.51 | 0.44 |
| O14523 | C2 domain-containing protein 2-like                         | C2CD2L     | 662  | S | 0.799 | 106.3 | 1.63 | NaN  | NaN  | 1.22 | NaN  | 1.34 | 1.17 | 1.23 | 1.26 |
| O14545 | TRAF-type zinc finger domain-containing protein 1           | TRAFD1     | 415  | S | 0.966 | 159.4 | 0.99 | 0.92 | 0.82 | 0.92 | 0.78 | 0.96 | 0.94 | 1.01 | NaN  |
| O14613 | Cdc42 effector protein 2                                    | CDC42EP 2  | 141  | S | 0.991 | 61.52 | 4.09 | 2.62 | NaN  | NaN  | NaN  | NaN  | NaN  | NaN  | NaN  |
| O14686 | Histone-lysine N-methyltransferase 2D                       | KMT2D      | 4738 | S | 1     | 51.01 | 1.05 | 1.05 | NaN  | NaN  | NaN  | NaN  | 1.23 | NaN  | 1.20 |
| O14686 | Histone-lysine N-methyltransferase 2D                       | KMT2D      | 1671 | S | 1     | 66.02 | NaN  | 0.62 | NaN  | 1.12 | 1.35 | NaN  | NaN  | NaN  | NaN  |
| O14828 | Secretory carrier-associated membrane protein 3             | SCAMP3     | 76   | S | 0.997 | 96.67 | 0.91 | 0.95 | 0.98 | 1.15 | 1.13 | 1.10 | 0.70 | 0.69 | 0.71 |
| O14879 | Interferon-induced protein with tetratricopeptide repeats 3 | IFIT3      | 478  | S | 0.888 | 69.02 | NaN  | NaN  | NaN  | NaN  | 1.14 | 1.49 | NaN  | NaN  | NaN  |
| O14974 | Protein phosphatase 1 regulatory subunit 12A                | PPP1R12 A  | 299  | S | 1     | 107   | 0.52 | 0.33 | NaN  | 0.83 | NaN  | NaN  | NaN  | 0.49 | NaN  |
| O14974 | Protein phosphatase 1 regulatory subunit 12A                | PPP1R12 A  | 862  | S | 1     | 227.4 | NaN  | 0.87 | NaN  | NaN  | NaN  | NaN  | 1.49 | NaN  | 0.83 |
| O14974 | Protein phosphatase 1 regulatory subunit 12A                | PPP1R12 A  | 871  | S | 0.986 | 326.5 | 1.02 | NaN  | 1.02 | 0.88 | NaN  | 1.24 | 1.26 | 1.04 | 1.04 |
| O15173 | Membrane-associated progesterone receptor component 2       | PGRMC2     | 90   | S | 0.997 | 218.1 | NaN  | NaN  | NaN  | 3.14 | 3.40 | NaN  | 1.19 | NaN  | 1.08 |

|        |                                                                        |               |      |   |       |       |      |      |      |      |      |      |      |      |      |
|--------|------------------------------------------------------------------------|---------------|------|---|-------|-------|------|------|------|------|------|------|------|------|------|
| O15173 | Membrane-associated progesterone receptor component 2                  | PGRMC2        | 208  | S | 0.998 | 125.7 | 1.70 | 1.85 | 1.91 | 2.20 | 1.99 | 2.08 | 1.98 | 1.23 | 1.67 |
| O15446 | DNA-directed RNA polymerase I subunit RPA34                            | CD3EAP        | 136  | S | 1     | 85.02 | NaN  | 2.21 | 2.23 | NaN  | 2.63 | NaN  | 1.26 | 1.40 | 1.75 |
| O15446 | DNA-directed RNA polymerase I subunit RPA34                            | CD3EAP        | 285  | S | 0.94  | 153.4 | 1.42 | 1.54 | 1.34 | 1.41 | 1.51 | 1.58 | 0.64 | 0.60 | 0.75 |
| O15541 | RING finger protein 113A                                               | RNF113A       | 84   | S | 0.997 | 121.3 | 1.14 | 1.25 | 1.02 | 0.85 | 0.93 | 0.78 | 0.85 | 0.83 | 0.77 |
| O15541 | RING finger protein 113A                                               | RNF113A       | 85   | S | 0.995 | 121.3 | 1.14 | 1.25 | 1.02 | 0.85 | 0.93 | 0.78 | 0.85 | 0.83 | 0.77 |
| O15541 | RING finger protein 113A                                               | RNF113A       | 253  | S | 1     | 201.7 | 1.47 | 1.56 | 1.58 | 1.34 | 1.39 | 1.25 | 1.14 | 1.36 | 1.34 |
| O43150 | Arf-GAP with SH3 domain, ANK repeat and PH domain-containing protein 2 | ASAP2         | 701  | S | 1     | 316.6 | 0.90 | 0.87 | 0.77 | 1.08 | 1.13 | 0.98 | 0.62 | 0.66 | 0.58 |
| O43237 | Cytoplasmic dynein 1 light intermediate chain 2                        | DYNC1LI2      | 194  | S | 1     | 201.2 | 0.66 | 0.63 | 0.74 | 0.85 | 0.83 | 0.86 | 0.71 | 0.67 | 0.68 |
| O43237 | Cytoplasmic dynein 1 light intermediate chain 2                        | DYNC1LI2      | 407  | S | 0.719 | 111   | 1.96 | 2.92 | NaN  | NaN  | NaN  | NaN  | NaN  | NaN  | NaN  |
| O43290 | U4/U6.U5 tri-snRNP-associated protein 1                                | SART1         | 448  | S | 1     | 114.1 | 1.74 | 1.85 | 1.39 | 1.66 | 1.49 | 1.47 | 2.20 | 2.17 | 1.84 |
| O43290 | U4/U6.U5 tri-snRNP-associated protein 1                                | SART1         | 598  | S | 0.894 | 83.56 | 0.70 | 0.59 | NaN  | 0.71 | NaN  | NaN  | NaN  | 0.82 | NaN  |
| O43290 | U4/U6.U5 tri-snRNP-associated protein 1                                | SART1         | 474  | S | 1     | 137.7 | 0.60 | 0.51 | 0.58 | 0.91 | 1.10 | 0.70 | 0.77 | 0.77 | 0.67 |
| O43290 | U4/U6.U5 tri-snRNP-associated protein 1                                | SART1         | 486  | S | 1     | 137.7 | 0.60 | 0.51 | 0.58 | 0.91 | 1.10 | 0.70 | 0.77 | 0.77 | 0.67 |
| O43294 | Transforming growth factor beta-1-induced transcript 1 protein         | TGFB111       | 137  | S | 1     | 87.33 | 2.47 | 2.36 | 2.61 | 0.74 | 1.30 | 2.91 | 1.40 | 1.53 | NaN  |
| O43294 | Transforming growth factor beta-1-induced transcript 1 protein         | TGFB111       | 140  | S | 0.612 | 87.33 | 2.47 | 2.36 | 2.61 | NaN  | NaN  | 2.91 | 2.13 | NaN  | NaN  |
| O43294 | Transforming growth factor beta-1-induced transcript 1 protein         | TGFB111       | 141  | S | 0.934 | 79.88 | NaN  | NaN  | NaN  | 2.49 | 2.71 | NaN  | NaN  | 2.22 | NaN  |
| O43294 | Transforming growth factor beta-1-induced transcript 1 protein         | TGFB111       | 68   | S | 1     | 145.1 | 1.47 | 1.21 | 1.39 | 1.39 | 1.37 | 1.50 | 1.39 | 1.45 | 1.40 |
| O43294 | Transforming growth factor beta-1-induced transcript 1 protein         | TGFB111       | 194  | S | 0.945 | 97.08 | 0.96 | 0.64 | 1.07 | 1.34 | 1.15 | NaN  | 1.39 | 1.17 | 1.30 |
| Q9UG54 | Mitogen-activated protein kinase kinase kinase 7                       | DKFZp586F0420 | 93   | S | 1     | 177.6 | 1.91 | 1.78 | 1.48 | 1.46 | 1.44 | NaN  | 1.86 | 1.92 | 1.86 |
| O43379 | WD repeat-containing protein 62                                        | WDR62         | 1144 | S | 0.881 | 83.6  | 0.35 | 0.41 | NaN  | NaN  | NaN  | NaN  | 0.62 | NaN  | NaN  |
| O43379 | WD repeat-containing protein 62                                        | WDR62         | 32   | S | 0.64  | 80.91 | 0.70 | NaN  | 0.78 | NaN  | 0.57 | 0.94 | 1.17 | NaN  | 1.02 |

|        |                                                                                               |         |      |   |       |       |      |      |      |      |      |      |      |      |      |
|--------|-----------------------------------------------------------------------------------------------|---------|------|---|-------|-------|------|------|------|------|------|------|------|------|------|
| O43379 | WD repeat-containing protein 62                                                               | WDR62   | 33   | S | 0.941 | 78.89 | NaN  | 0.97 | 0.78 | NaN  | 0.57 | NaN  | 1.17 | 0.79 | 1.02 |
| O43379 | WD repeat-containing protein 62                                                               | WDR62   | 1228 | S | 0.99  | 139.8 | 1.04 | 1.14 | 0.77 | NaN  | NaN  | NaN  | NaN  | NaN  | NaN  |
| O43395 | U4/U6 small nuclear ribonucleoprotein Prp3                                                    | PRPF3   | 619  | S | 1     | 47.73 | NaN  | NaN  | 0.44 | NaN  | 0.70 | 0.88 | NaN  | 0.74 | 0.85 |
| O43399 | Tumor protein D54                                                                             | TPD52L2 | 166  | S | 1     | 190.8 | 1.46 | 1.65 | 1.58 | 1.28 | 1.27 | 1.31 | 3.55 | 3.45 | 3.46 |
| O43463 | Histone-lysine N-methyltransferase SUV39H1                                                    | SUV39H1 | 391  | S | 1     | 79.49 | NaN  | NaN  | NaN  | 0.54 | 0.75 | NaN  | NaN  | NaN  | NaN  |
| O43493 | Trans-Golgi network integral membrane protein 2                                               | TGOLN2  | 71   | S | 0.991 | 210.7 | 0.71 | 0.94 | 0.91 | 0.92 | NaN  | 0.97 | 0.74 | 0.94 | 0.82 |
| O43493 | Trans-Golgi network integral membrane protein 2                                               | TGOLN2  | 298  | S | 1     | 257   | NaN  | 1.13 | NaN  | 1.31 | NaN  | NaN  | 1.17 | NaN  | 1.98 |
| O43719 | HIV Tat-specific factor 1                                                                     | HTATSF1 | 579  | S | 1     | 104.8 | NaN  | 1.11 | 0.97 | 1.02 | 1.06 | NaN  | 1.17 | NaN  | 1.26 |
| O43719 | HIV Tat-specific factor 1                                                                     | HTATSF1 | 624  | S | 1     | 251.7 | 0.73 | 0.70 | 0.71 | 0.82 | 0.80 | 0.78 | 0.82 | 0.90 | 0.73 |
| O43719 | HIV Tat-specific factor 1                                                                     | HTATSF1 | 498  | S | 1     | 145.4 | 0.76 | 0.82 | 1.18 | NaN  | NaN  | 1.39 | 0.87 | NaN  | 0.99 |
| O43719 | HIV Tat-specific factor 1                                                                     | HTATSF1 | 453  | S | 0.985 | 157.3 | 0.93 | 0.92 | 0.93 | 1.04 | 1.04 | 1.13 | 0.95 | 1.02 | 1.29 |
| O43719 | HIV Tat-specific factor 1                                                                     | HTATSF1 | 676  | S | 1     | 311.8 | 0.80 | 0.83 | 0.82 | 0.91 | 0.96 | 0.87 | 0.89 | 0.87 | 0.91 |
| O43719 | HIV Tat-specific factor 1                                                                     | HTATSF1 | 642  | S | 1     | 252.1 | 0.90 | 0.84 | 0.88 | 0.98 | 1.24 | 0.88 | 1.14 | 1.15 | 1.05 |
| O43719 | HIV Tat-specific factor 1                                                                     | HTATSF1 | 616  | S | 1     | 155.9 | 0.75 | 0.75 | 0.77 | 0.99 | 1.01 | 1.01 | 0.97 | 1.01 | 1.05 |
| O43765 | Small glutamine-rich tetratricopeptide repeat-containing protein alpha                        | SGTA    | 77   | S | 1     | 121.9 | 1.35 | 1.57 | 1.43 | 2.40 | 2.39 | 2.43 | 0.83 | 0.80 | 0.85 |
| O43765 | Small glutamine-rich tetratricopeptide repeat-containing protein alpha                        | SGTA    | 305  | S | 0.977 | 237.1 | NaN  | NaN  | 1.24 | 1.60 | NaN  | 1.51 | NaN  | 1.36 | NaN  |
| O43815 | Striatin                                                                                      | STRN    | 245  | S | 1     | 176.4 | 0.96 | NaN  | NaN  | NaN  | NaN  | NaN  | 1.11 | NaN  | 1.29 |
| O43815 | Striatin                                                                                      | STRN    | 137  | S | 0.998 | 204.2 | 0.36 | 0.44 | 0.34 | 0.76 | 0.70 | 0.75 | 0.36 | 0.34 | 0.49 |
| O60244 | Mediator of RNA polymerase II transcription subunit 14                                        | MED14   | 986  | S | 1     | 140.5 | 0.37 | 0.36 | 0.42 | 0.63 | NaN  | 0.55 | 0.34 | 0.42 | 0.50 |
| O60264 | SWI/SNF-related matrix-associated actin-dependent regulator of chromatin subfamily A member 5 | SMARCA5 | 66   | S | 1     | 231.5 | NaN  | 0.50 | NaN  | 0.75 | 0.86 | 0.88 | 0.67 | NaN  | 0.46 |
| O60271 | C-Jun-amino-terminal kinase-interacting protein 4                                             | SPAG9   | 329  | S | 0.936 | 66.57 | NaN  | 0.54 | NaN  | 1.00 | 0.92 | 0.72 | 0.95 | 1.09 | NaN  |
| O60271 | C-Jun-amino-terminal kinase-interacting protein 4                                             | SPAG9   | 332  | S | 0.997 | 79.61 | 0.46 | 0.47 | 0.68 | 0.57 | 0.67 | 0.59 | 1.08 | 1.15 | 1.17 |
| O60271 | C-Jun-amino-terminal kinase-interacting protein 4                                             | SPAG9   | 730  | S | 0.999 | 125.2 | 0.93 | 1.06 | 1.41 | 1.31 | 1.37 | NaN  | 0.96 | 1.00 | 1.21 |
| O60271 | C-Jun-amino-terminal kinase-interacting protein 4                                             | SPAG9   | 732  | S | 0.688 | 66.78 | NaN  | NaN  | 1.41 | NaN  | 1.34 | NaN  | 1.38 | NaN  | 0.90 |
| O60271 | C-Jun-amino-terminal kinase-interacting protein 4                                             | SPAG9   | 733  | S | 0.985 | 192.9 | 0.86 | 0.68 | 0.66 | 0.82 | 0.81 | 0.64 | 0.79 | 0.82 | 0.66 |
| O60271 | C-Jun-amino-terminal kinase-interacting protein 4                                             | SPAG9   | 251  | S | 1     | 105.9 | 0.72 | 0.73 | 0.79 | 0.98 | 0.90 | 0.90 | 1.03 | 0.92 | 0.96 |

|        |                                                              |         |      |   |       |       |      |      |      |      |      |      |      |      |      |
|--------|--------------------------------------------------------------|---------|------|---|-------|-------|------|------|------|------|------|------|------|------|------|
| O60292 | Signal-induced proliferation-associated 1-like protein 3     | SIPA1L3 | 1364 | S | 1     | 65.57 | NaN  | NaN  | NaN  | NaN  | NaN  | NaN  | 2.21 | 3.49 | NaN  |
| O60292 | Signal-induced proliferation-associated 1-like protein 3     | SIPA1L3 | 1534 | S | 0.5   | 48.33 | NaN  | 0.97 | 0.81 | 1.09 | NaN  | NaN  | NaN  | NaN  | NaN  |
| O60292 | Signal-induced proliferation-associated 1-like protein 3     | SIPA1L3 | 1544 | S | 0.996 | 88.1  | NaN  | 1.28 | 1.24 | NaN  | 0.89 | NaN  | 1.81 | 1.81 | 1.70 |
| O60502 | Protein O-GlcNAcase                                          | MGEA5   | 364  | S | 1     | 101   | 0.67 | 0.61 | 0.64 | 0.93 | 0.95 | 0.82 | 0.65 | 0.61 | NaN  |
| O60551 | Glycylpeptide N-tetradecanoyltransferase 2                   | NMT2    | 66   | S | 0.959 | 78.78 | 0.51 | 0.50 | 0.52 | 0.72 | 0.62 | 0.55 | 0.59 | 0.55 | 1.00 |
| O60551 | Glycylpeptide N-tetradecanoyltransferase 2                   | NMT2    | 68   | S | 0.997 | 78.78 | 0.51 | 0.50 | 1.54 | 1.03 | 1.16 | 1.00 | 0.94 | 1.33 | 1.05 |
| O60551 | Glycylpeptide N-tetradecanoyltransferase 2                   | NMT2    | 70   | S | 0.98  | 78.78 | NaN  | NaN  | 0.84 | NaN  | 0.90 | NaN  | NaN  | 0.96 | 1.00 |
| O60551 | Glycylpeptide N-tetradecanoyltransferase 2                   | NMT2    | 38   | S | 1     | 91.75 | NaN  | 0.78 | 0.76 | 0.98 | NaN  | 0.93 | 1.01 | 0.98 | 0.96 |
| O60566 | Mitotic checkpoint serine/threonine-protein kinase BUB1 beta | BUB1B   | 670  | S | 1     | 43.54 | NaN  | NaN  | NaN  | 1.15 | 1.25 | NaN  | NaN  | NaN  | NaN  |
| O60763 | General vesicular transport factor p115                      | USO1    | 942  | S | 1     | 269.8 | 1.24 | 1.32 | 1.32 | 1.30 | 1.09 | NaN  | 0.89 | NaN  | 1.07 |
| O60784 | Target of Myb protein 1                                      | TOM1    | 462  | S | 0.8   | 86.48 | 1.97 | NaN  | NaN  | 1.62 | 1.85 | NaN  | 1.22 | NaN  | 1.39 |
| O60832 | H/ACA ribonucleoprotein complex subunit 4                    | DKC1    | 485  | S | 1     | 129.5 | NaN  | NaN  | 1.43 | 1.54 | 0.60 | 1.55 | 1.40 | 1.17 | NaN  |
| O60832 | H/ACA ribonucleoprotein complex subunit 4                    | DKC1    | 494  | S | 0.998 | 310.1 | 0.89 | 0.86 | 0.97 | 0.92 | 0.96 | 0.96 | 0.96 | 0.78 | 0.90 |
| O60832 | H/ACA ribonucleoprotein complex subunit 4                    | DKC1    | 513  | S | 1     | 118.9 | 1.21 | 1.17 | 1.30 | 1.11 | NaN  | 1.11 | 1.04 | 0.96 | 1.10 |
| O60832 | H/ACA ribonucleoprotein complex subunit 4                    | DKC1    | 451  | S | 1     | 99.37 | 1.00 | 1.06 | 1.30 | 1.00 | 1.03 | 0.87 | 0.98 | 0.96 | 0.56 |
| O60832 | H/ACA ribonucleoprotein complex subunit 4                    | DKC1    | 453  | S | 1     | 99.37 | 1.00 | 1.06 | 1.30 | 1.00 | 1.03 | 1.00 | 0.98 | 0.96 | 0.97 |
| O60832 | H/ACA ribonucleoprotein complex subunit 4                    | DKC1    | 455  | S | 1     | 98.63 | 1.17 | 1.26 | 1.30 | 0.93 | 1.78 | 1.49 | 1.26 | 0.95 | 1.09 |
| O75379 | Vesicle-associated membrane protein 4                        | VAMP4   | 30   | S | 1     | 221.9 | 1.01 | 1.11 | 1.08 | 1.12 | 0.95 | 0.95 | 1.03 | 1.14 | 1.01 |
| O75436 | Vacuolar protein sorting-associated protein 26A              | VPS26A  | 315  | S | 1     | 229.5 | NaN  | NaN  | 2.03 | 2.43 | 2.60 | 2.76 | NaN  | 0.40 | 0.41 |
| O75475 | PC4 and SFRS1-interacting protein                            | PSIP1   | 106  | S | 0.985 | 179   | 0.69 | NaN  | NaN  | 0.76 | 0.73 | 0.77 | 0.82 | 0.81 | 0.89 |
| O75475 | PC4 and SFRS1-interacting protein                            | PSIP1   | 273  | S | 0.977 | 287   | 0.53 | 0.56 | 0.50 | 0.56 | NaN  | 0.52 | 0.62 | NaN  | 0.63 |
| O75475 | PC4 and SFRS1-interacting protein                            | PSIP1   | 275  | S | 1     | 287   | 0.53 | 0.56 | 0.50 | 0.56 | 0.57 | 0.52 | 0.62 | 0.73 | 0.63 |
| Q5JRI1 | Serine/arginine-rich splicing factor 10                      | SRSF10  | 133  | S | 1     | 84.06 | 1.00 | 1.08 | 1.08 | 1.01 | 1.07 | 0.97 | 1.38 | 1.14 | 1.34 |
| Q5JRI1 | Serine/arginine-rich splicing factor 10                      | SRSF10  | 131  | S | 1     | 61.11 | 1.02 | 1.06 | 1.01 | 0.95 | 0.97 | 0.93 | 1.24 | 1.25 | 1.24 |



|        |                                                     |         |     |   |       |       |      |      |      |      |      |      |      |      |      |
|--------|-----------------------------------------------------|---------|-----|---|-------|-------|------|------|------|------|------|------|------|------|------|
| Q5JR11 | Serine/arginine-rich splicing factor 10             | SRSF10  | 129 | S | 1     | 61.11 | NaN  | 1.09 | 1.08 | 0.96 | 0.96 | NaN  | 1.25 | 1.28 | NaN  |
| O75533 | Splicing factor 3B subunit 1                        | SF3B1   | 488 | S | 0.993 | 128.9 | 2.04 | 2.18 | 2.43 | 3.80 | 3.69 | 3.07 | NaN  | 0.66 | NaN  |
| O75533 | Splicing factor 3B subunit 1                        | SF3B1   | 129 | S | 1     | 129   | 0.90 | 0.85 | 0.82 | 1.12 | 0.93 | 0.98 | 0.63 | 0.71 | 0.74 |
| O75683 | Surfeit locus protein 6                             | SURF6   | 138 | S | 1     | 97.16 | 0.95 | NaN  | 0.90 | 0.93 | 0.99 | 0.93 | 0.92 | 0.97 | 0.92 |
| S4R419 | Transcription elongation factor A protein 3         | TCEA3   | 78  | S | 1     | 107.6 | 0.41 | 0.40 | 0.67 | 0.52 | 0.55 | 0.63 | 0.42 | 0.57 | 0.62 |
| O76021 | Ribosomal L1 domain-containing protein 1            | RSL1D1  | 427 | S | 0.952 | 67.93 | NaN  | NaN  | 0.83 | 1.65 | NaN  | 1.31 | 0.62 | NaN  | 0.75 |
| O76021 | Ribosomal L1 domain-containing protein 1            | RSL1D1  | 361 | S | 1     | 220.1 | 1.65 | 1.64 | 1.63 | 1.73 | 1.68 | 1.73 | 1.03 | 0.86 | 1.09 |
| O76021 | Ribosomal L1 domain-containing protein 1            | RSL1D1  | 443 | S | 0.997 | 48.57 | 1.46 | 1.58 | NaN  | 2.14 | 2.37 | NaN  | NaN  | 0.60 | 0.80 |
| Q5QPB1 | AN1-type zinc finger protein 5                      | ZFAND5  | 100 | S | 0.958 | 105.1 | NaN  | 1.43 | NaN  | 1.20 | 1.80 | NaN  | NaN  | NaN  | NaN  |
| O76094 | Signal recognition particle subunit SRP72           | SRP72   | 620 | S | 0.772 | 146.6 | 0.54 | 1.07 | NaN  | 1.20 | NaN  | NaN  | NaN  | NaN  | NaN  |
| O76094 | Signal recognition particle subunit SRP72           | SRP72   | 621 | S | 0.976 | 264.8 | 0.64 | 0.81 | 0.52 | 0.53 | NaN  | 0.57 | 0.81 | NaN  | 1.00 |
| O76094 | Signal recognition particle subunit SRP72           | SRP72   | 625 | S | 0.994 | 264.8 | 1.09 | 1.08 | 1.13 | 1.10 | NaN  | 1.09 | 0.87 | 0.88 | 0.94 |
| O94804 | Serine/threonine-protein kinase 10                  | STK10   | 438 | S | 1     | 304.7 | 1.13 | 1.16 | 1.13 | 1.03 | 1.05 | 1.01 | 1.18 | 1.16 | 1.10 |
| O94806 | Serine/threonine-protein kinase D3                  | PRKD3   | 27  | S | 0.705 | 80.24 | 0.94 | 1.21 | 1.76 | 1.07 | NaN  | NaN  | NaN  | NaN  | NaN  |
| O94806 | Serine/threonine-protein kinase D3                  | PRKD3   | 30  | S | 0.844 | 80.24 | 0.94 | 1.21 | 1.76 | 1.07 | NaN  | NaN  | 1.55 | 2.10 | NaN  |
| O94806 | Serine/threonine-protein kinase D3                  | PRKD3   | 31  | S | 0.844 | 73.06 | 0.94 | 1.21 | 1.76 | 1.07 | NaN  | NaN  | 1.55 | 2.10 | NaN  |
| O94826 | Mitochondrial import receptor subunit TOM70         | TOMM70A | 91  | S | 1     | 184.3 | 1.01 | 1.07 | 1.09 | 1.07 | 1.23 | 1.06 | 0.88 | 0.89 | 0.90 |
| O94874 | E3 UFM1-protein ligase 1                            | UFL1    | 458 | S | 1     | 171.4 | 0.71 | 0.81 | 0.84 | 0.83 | 0.82 | 0.80 | 0.89 | 0.94 | 0.89 |
| O95104 | Splicing factor, arginine/serine-rich 15            | SCAF4   | 154 | S | 1     | 191.8 | 0.80 | 0.81 | 0.80 | 1.05 | NaN  | 0.93 | 0.72 | NaN  | 0.72 |
| O95155 | Ubiquitin conjugation factor E4B                    | UBE4B   | 88  | S | 0.949 | 175.2 | 0.55 | NaN  | NaN  | 0.63 | NaN  | 0.75 | 0.98 | NaN  | NaN  |
| O95218 | Zinc finger Ran-binding domain-containing protein 2 | ZRANB2  | 120 | S | 1     | 209.7 | NaN  | NaN  | NaN  | 1.01 | NaN  | NaN  | 1.44 | 1.51 | NaN  |
| O95218 | Zinc finger Ran-binding domain-containing protein 2 | ZRANB2  | 153 | S | 1     | 178.9 | 1.17 | NaN  | 1.09 | NaN  | NaN  | NaN  | NaN  | NaN  | 1.56 |
| O95218 | Zinc finger Ran-binding domain-containing protein 2 | ZRANB2  | 188 | S | 1     | 103.4 | 1.10 | NaN  | 0.98 | 0.81 | NaN  | NaN  | 1.01 | 1.06 | 2.19 |
| O95297 | Myelin protein zero-like protein 1                  | MPZL1   | 210 | S | 0.996 | 192.2 | 2.11 | 2.13 | NaN  | 2.14 | 1.75 | 1.65 | 0.75 | 0.84 | 0.87 |
| O95297 | Myelin protein zero-like protein 1                  | MPZL1   | 219 | S | 0.992 | 57.28 | NaN  | 1.59 | NaN  | 2.28 | 2.02 | NaN  | 1.01 | 0.99 | NaN  |
| O95365 | Zinc finger and BTB domain-containing protein 7A    | ZBTB7A  | 337 | S | 1     | 172.6 | 1.01 | 1.02 | 0.87 | 0.91 | 0.91 | 0.82 | 1.00 | 0.93 | 1.09 |

|        |                                                  |             |      |   |       |       |      |      |      |      |      |      |      |      |      |
|--------|--------------------------------------------------|-------------|------|---|-------|-------|------|------|------|------|------|------|------|------|------|
| O95365 | Zinc finger and BTB domain-containing protein 7A | ZBTB7A      | 525  | S | 0.652 | 148.4 | 0.80 | 0.89 | 0.92 | NaN  | NaN  | 1.02 | 0.96 | 0.93 | NaN  |
| O95365 | Zinc finger and BTB domain-containing protein 7A | ZBTB7A      | 526  | S | 0.573 | 148.4 | NaN  | NaN  | NaN  | NaN  | NaN  | NaN  | NaN  | 0.93 | 1.04 |
| O95365 | Zinc finger and BTB domain-containing protein 7A | ZBTB7A      | 549  | S | 1     | 55.66 | 1.07 | 0.79 | NaN  | NaN  | NaN  | NaN  | NaN  | NaN  | NaN  |
| O95391 | Pre-mRNA-splicing factor                         | SLU7        | 215  | S | 1     | 108.2 | 0.99 | 1.00 | 1.04 | 1.01 | 0.99 | 0.94 | 1.17 | 1.14 | 1.11 |
| O95400 | CD2 antigen cytoplasmic tail-binding protein 2   | CD2BP2      | 195  | S | 0.836 | 54.02 | 0.74 | NaN  | NaN  | NaN  | 0.89 | NaN  | 0.91 | 0.79 | NaN  |
| O95425 | Supervillin                                      | SVIL        | 245  | S | 1     | 161   | 0.79 | 0.88 | 0.91 | 1.01 | 0.93 | 1.08 | 1.06 | 1.05 | 0.96 |
| O95425 | Supervillin                                      | SVIL        | 1322 | S | 1     | 70.45 | 0.85 | 0.79 | 2.57 | 1.58 | NaN  | NaN  | NaN  | NaN  | NaN  |
| O95425 | Supervillin                                      | SVIL        | 968  | S | 1     | 215.5 | 1.10 | 0.98 | 1.10 | 1.33 | 1.49 | 1.39 | 1.27 | 1.45 | 1.39 |
| O95613 | Pericentrin                                      | PCNT        | 2177 | S | 1     | 88.49 | NaN  | NaN  | NaN  | 1.43 | 1.52 | NaN  | 0.65 | 0.70 | NaN  |
| O95628 | CCR4-NOT transcription complex subunit 4         | CNOT4       | 430  | S | 0.674 | 136   | 1.83 | 1.58 | NaN  | NaN  | NaN  | NaN  | NaN  | NaN  | NaN  |
| O95628 | CCR4-NOT transcription complex subunit 4         | CNOT4       | 432  | S | 0.938 | 195.9 | NaN  | NaN  | 1.77 | 1.96 | 2.11 | 1.77 | 1.48 | NaN  | NaN  |
| O95674 | Phosphatidate cytidyltransferase 2               | CDS2        | 23   | S | 0.902 | 74.81 | 1.52 | 1.29 | NaN  | NaN  | NaN  | NaN  | NaN  | NaN  | NaN  |
| O95674 | Phosphatidate cytidyltransferase 2               | CDS2        | 33   | S | 0.672 | 135.9 | 0.95 | 1.29 | 1.00 | 0.97 | 1.00 | 1.04 | NaN  | 1.01 | 0.94 |
| O95684 | FGFR1 oncogene partner                           | FGFR1O<br>P | 156  | S | 1     | 124.4 | 0.80 | 0.99 | 0.84 | 0.84 | 0.95 | 0.89 | 0.83 | 0.72 | 0.69 |
| O95684 | FGFR1 oncogene partner                           | FGFR1O<br>P | 160  | S | 1     | 124.4 | 0.80 | 0.77 | 0.84 | 0.84 | 0.95 | 0.89 | 0.83 | 0.72 | 0.77 |
| O95810 | Serum deprivation-response protein               | SDPR        | 25   | S | 0.974 | 157.3 | 0.73 | 0.71 | 0.67 | 1.05 | 1.10 | 1.04 | 0.33 | 0.34 | 0.39 |
| O95810 | Serum deprivation-response protein               | SDPR        | 27   | S | 0.952 | 104.1 | 1.00 | 0.87 | NaN  | 1.16 | NaN  | 0.69 | NaN  | 1.33 | NaN  |
| O95810 | Serum deprivation-response protein               | SDPR        | 293  | S | 0.995 | 78.07 | 0.56 | 0.60 | 0.88 | 0.53 | 0.50 | 1.45 | 0.84 | NaN  | NaN  |
| O95817 | BAG family molecular chaperone regulator 3       | BAG3        | 171  | S | 0.614 | 145.8 | 2.08 | 2.10 | 2.39 | 1.73 | 1.91 | 1.70 | 1.17 | 1.08 | 1.19 |
| O95817 | BAG family molecular chaperone regulator 3       | BAG3        | 173  | S | 1     | 359.9 | 2.40 | 2.31 | 1.98 | 2.00 | 1.79 | 1.94 | 1.11 | 1.19 | 1.21 |
| O95817 | BAG family molecular chaperone regulator 3       | BAG3        | 275  | S | 0.874 | 86.25 | 5.71 | 6.01 | 5.48 | 3.44 | 3.60 | 2.93 | 3.32 | 3.33 | 3.29 |
| O95817 | BAG family molecular chaperone regulator 3       | BAG3        | 279  | S | 1     | 86.25 | 6.19 | 6.20 | 5.48 | 3.44 | 3.60 | 2.93 | 3.32 | 3.33 | 3.29 |
| O95817 | BAG family molecular chaperone regulator 3       | BAG3        | 377  | S | 1     | 151.3 | 1.49 | 1.63 | 1.69 | 1.42 | 2.82 | 1.45 | 1.27 | 1.33 | 1.30 |
| O95817 | BAG family molecular chaperone regulator 3       | BAG3        | 385  | S | 0.656 | 133.5 | 1.41 | 1.57 | 2.61 | 1.49 | 2.82 | 1.83 | 0.68 | 0.79 | 0.71 |
| O95817 | BAG family molecular chaperone regulator 3       | BAG3        | 386  | S | 0.836 | 151.3 | 1.69 | 1.64 | 1.63 | 1.53 | 1.18 | 1.57 | 0.69 | 1.24 | 1.29 |
| O95835 | Serine/threonine-protein kinase LATS1            | LATS1       | 613  | S | 0.971 | 114.9 | NaN  | NaN  | 1.37 | NaN  | 1.31 | 1.30 | 0.82 | 0.88 | NaN  |

|        |                                                                                        |          |        |   |       |       |      |      |      |      |      |      |      |      |      |
|--------|----------------------------------------------------------------------------------------|----------|--------|---|-------|-------|------|------|------|------|------|------|------|------|------|
| Q9NZH5 | Securin-2;Securin                                                                      | PTTG2    | 165    | S | 1     | 122.5 | 0.83 | NaN  | NaN  | 1.57 | 1.50 | NaN  | 0.99 | NaN  | 1.07 |
| O96007 | Molybdopterin synthase catalytic subunit                                               | MOCS2    | 20     | S | 0.984 | 45.01 | NaN  | 2.69 | NaN  | 2.52 | 3.01 | NaN  | 0.91 | NaN  | NaN  |
| O96013 | Serine/threonine-protein kinase PAK 4                                                  | PAK4     | 181    | S | 0.99  | 53.1  | 0.76 | 0.73 | NaN  | 0.73 | 0.78 | NaN  | NaN  | 1.12 | NaN  |
| O96013 | Serine/threonine-protein kinase PAK 4                                                  | PAK4     | 104    | S | 1     | 81.57 | 0.75 | 0.73 | 0.73 | NaN  | 0.70 | 0.66 | NaN  | NaN  | 0.85 |
| P00558 | Phosphoglycerate kinase 1                                                              | PGK1     | 203    | S | 1     | 228.6 | 1.05 | 1.09 | 1.05 | 1.14 | 1.13 | 1.08 | 1.17 | 1.19 | 1.22 |
| P02545 | Prelamin-A/C;Lamin-A/C                                                                 | LMNA     | 390    | S | 1     | 209.8 | 1.36 | 1.42 | 1.38 | 1.40 | 1.32 | 1.41 | 1.34 | 1.34 | 1.40 |
| P02545 | Prelamin-A/C;Lamin-A/C                                                                 | LMNA     | 392    | S | 1     | 201.8 | 1.02 | 1.02 | 0.93 | 1.25 | 1.24 | 1.27 | 1.23 | 1.17 | 1.20 |
| P02545 | Prelamin-A/C;Lamin-A/C                                                                 | LMNA     | 458    | S | 1     | 148.5 | 0.63 | 0.58 | 0.61 | 1.00 | 0.85 | 0.88 | 0.56 | 0.60 | 0.62 |
| P02545 | Prelamin-A/C;Lamin-A/C                                                                 | LMNA     | 22     | S | 0.998 | 295.7 | 2.65 | 2.74 | 2.49 | 4.48 | 4.30 | 4.11 | 0.87 | 0.89 | 0.92 |
| P04406 | Glyceraldehyde-3-phosphate dehydrogenase                                               | GAPDH    | 83     | S | 1     | 76.21 | 1.20 | 1.39 | NaN  | NaN  | NaN  | NaN  | NaN  | NaN  | NaN  |
| P05387 | 60S acidic ribosomal protein P2;60S acidic ribosomal protein P1                        | RPLP2    | 102    | S | 1     | 315.9 | 0.30 | 0.27 | 0.99 | 0.98 | 0.37 | 0.98 | 0.92 | 0.67 | 0.84 |
| P05387 | 60S acidic ribosomal protein P2;60S acidic ribosomal protein P1                        | RPLP2    | 105    | S | 1     | 315.9 | 0.52 | 0.43 | 0.28 | 0.35 | 0.35 | 0.35 | 0.68 | 0.83 | 0.70 |
| P05387 | 60S acidic ribosomal protein P1                                                        | RPLP2    | 17     | S | 0.853 | 116.3 | 1.06 | NaN  | 1.33 | 1.46 | 1.55 | 1.67 | 0.28 | NaN  | NaN  |
| P17535 | Transcription factor AP-1;Transcription factor jun-D                                   | JUN      | 73;100 | S | 1     | 98.63 | 1.09 | 1.01 | 1.04 | 1.21 | 1.22 | 1.17 | 1.18 | 1.20 | 1.24 |
| P05455 | Lupus La protein                                                                       | SSB      | 366    | S | 1     | 325.3 | 0.84 | 0.84 | 0.87 | 0.90 | 0.88 | 0.89 | 1.00 | 0.95 | 0.98 |
| P06748 | Nucleophosmin                                                                          | NPM1     | 125    | S | 1     | 359.6 | 0.97 | 1.00 | 0.96 | 0.85 | 0.90 | 0.85 | 0.94 | 0.93 | 0.94 |
| P06748 | Nucleophosmin                                                                          | NPM1     | 70     | S | 0.994 | 73.77 | NaN  | NaN  | 0.63 | 0.84 | 0.78 | NaN  | 0.63 | 0.91 | 1.14 |
| P06748 | Nucleophosmin                                                                          | NPM1     | 243    | S | 0.903 | 60.26 | 3.72 | 3.21 | 3.37 | 5.67 | 6.53 | NaN  | NaN  | NaN  | 0.76 |
| V9GYZ6 | Bifunctional glutamate/proline-tRNA ligase;Glutamate--tRNA ligase;Proline--tRNA ligase | EPRS     | 889    | S | 0.739 | 110.6 | 0.96 | 1.01 | NaN  | NaN  | NaN  | NaN  | 1.38 | NaN  | NaN  |
| V9GYZ6 | Bifunctional glutamate/proline-tRNA ligase;Glutamate--tRNA ligase;Proline--tRNA ligase | EPRS     | 892    | S | 0.808 | 250.9 | 0.76 | 1.01 | 0.78 | NaN  | 0.82 | NaN  | 1.38 | NaN  | NaN  |
| V9GYZ6 | Bifunctional glutamate/proline-tRNA ligase;Glutamate--tRNA ligase;Proline--tRNA ligase | EPRS     | 893    | S | 0.89  | 312.5 | 0.71 | 0.74 | 0.73 | 0.81 | 0.79 | 0.80 | 0.93 | 0.91 | 0.96 |
| P07900 | Heat shock protein HSP 90-alpha                                                        | HSP90AA1 | 231    | S | 1     | 173.2 | 0.95 | 0.94 | NaN  | 0.86 | 0.94 | 0.96 | 0.87 | 0.92 | 0.73 |
| P07900 | Heat shock protein HSP 90-alpha                                                        | HSP90AA1 | 263    | S | 1     | 340   | 0.91 | 0.94 | 0.91 | 1.02 | 1.00 | 1.05 | 0.98 | 0.94 | 0.99 |
| P08238 | Heat shock protein HSP 90-beta;Putative heat shock protein HSP 90-beta-3               | HSP90AB1 | 226    | S | 1     | 157.4 | 0.89 | 0.84 | 0.99 | 0.76 | 0.83 | 0.87 | 1.10 | 1.07 | 1.36 |
| P08238 | Heat shock protein HSP 90-beta;Putative heat shock protein HSP 90-beta 2               | HSP90AB1 | 255    | S | 1     | 332.4 | 0.91 | 0.95 | 0.86 | 0.89 | 0.90 | 0.89 | 0.95 | 0.93 | 0.99 |

|        |                                                                                                    |          |      |   |       |       |      |      |      |      |      |      |      |      |      |
|--------|----------------------------------------------------------------------------------------------------|----------|------|---|-------|-------|------|------|------|------|------|------|------|------|------|
| P08238 | Heat shock protein HSP 90-beta;Putative heat shock protein HSP 90-beta 2                           | HSP90AB1 | 261  | S | 1     | 306.1 | 0.87 | 1.16 | NaN  | 0.87 | 1.04 | 0.88 | 0.86 | 1.01 | NaN  |
| P08240 | Signal recognition particle receptor subunit alpha                                                 | SRPR     | 296  | S | 0.987 | 118.5 | NaN  | NaN  | 0.49 | NaN  | NaN  | NaN  | 0.90 | NaN  | 1.01 |
| P08240 | Signal recognition particle receptor subunit alpha                                                 | SRPR     | 297  | S | 0.842 | 118.5 | NaN  | NaN  | 0.49 | NaN  | NaN  | NaN  | 0.90 | NaN  | 1.01 |
| P08240 | Signal recognition particle receptor subunit alpha                                                 | SRPR     | 298  | S | 0.667 | 115.7 | NaN  | NaN  | 0.49 | NaN  | NaN  | NaN  | 0.90 | NaN  | 1.01 |
| P08621 | U1 small nuclear ribonucleoprotein 70 kDa                                                          | SNRNP70  | 226  | S | 0.973 | 45.68 | NaN  | NaN  | NaN  | NaN  | 0.97 | NaN  | 1.43 | 1.50 | 1.84 |
| P08670 | Vimentin                                                                                           | VIM      | 26   | S | 0.809 | 109   | NaN  | NaN  | NaN  | NaN  | NaN  | NaN  | NaN  | 0.87 | 0.84 |
| P08670 | Vimentin                                                                                           | VIM      | 214  | S | 1     | 59.98 | NaN  | NaN  | NaN  | 1.39 | 1.47 | NaN  | NaN  | NaN  | NaN  |
| P08670 | Vimentin                                                                                           | VIM      | 325  | S | 1     | 134.9 | 1.32 | 1.48 | NaN  | 1.91 | 1.19 | NaN  | 2.12 | 1.51 | 1.30 |
| P08670 | Vimentin                                                                                           | VIM      | 339  | S | 0.901 | 170   | 1.08 | 1.09 | NaN  | NaN  | NaN  | 0.88 | NaN  | NaN  | NaN  |
| P08670 | Vimentin                                                                                           | VIM      | 55   | S | 0.792 | 147.1 | NaN  | 1.20 | 1.20 | NaN  | NaN  | NaN  | NaN  | NaN  | NaN  |
| P08670 | Vimentin                                                                                           | VIM      | 56   | S | 0.991 | 157.4 | 1.08 | NaN  | NaN  | 0.99 | 0.97 | 1.12 | 0.54 | 0.46 | 0.54 |
| POC1Z6 | TCF3 fusion partner                                                                                | TFPT     | 249  | S | 1     | 104.6 | 0.82 | 0.76 | NaN  | 1.18 | 0.92 | 0.72 | 1.14 | 1.05 | 1.01 |
| POC1Z6 | TCF3 fusion partner                                                                                | TFPT     | 252  | S | 1     | 104.6 | 0.82 | 0.79 | NaN  | 1.18 | 0.92 | 0.72 | 1.14 | 1.05 | 1.01 |
| Q96II5 | Serine/threonine-protein kinase A-Raf                                                              | ARAF     | 260  | S | 1     | 77.64 | NaN  | NaN  | 1.03 | NaN  | NaN  | 1.03 | 1.10 | 1.23 | 1.58 |
| Q96II5 | Serine/threonine-protein kinase A-Raf;RAF proto-oncogene serine/threonine-Solute carrier family 2, | ARAF     | 585  | S | 1     | 85.82 | 0.91 | 0.93 | NaN  | NaN  | 1.19 | 1.16 | NaN  | 2.19 | 2.07 |
| P11166 | facilitated glucose transporter member 1                                                           | SLC2A1   | 473  | S | 0.688 | 64.25 | NaN  | NaN  | NaN  | NaN  | NaN  | NaN  | 3.04 | 2.97 | NaN  |
| P11274 | Breakpoint cluster region protein                                                                  | BCR      | 122  | S | 1     | 107.7 | 0.75 | 0.79 | 0.72 | 0.86 | 0.88 | NaN  | 0.73 | NaN  | 0.74 |
| P11388 | DNA topoisomerase 2-alpha                                                                          | TOP2A    | 1106 | S | 1     | 220.9 | 0.83 | 0.84 | 0.84 | 1.35 | 1.78 | 1.59 | 1.01 | 1.02 | 1.04 |
| P11388 | DNA topoisomerase 2-alpha                                                                          | TOP2A    | 1393 | S | 0.968 | 222.6 | 1.07 | 1.08 | 1.12 | 2.04 | 2.17 | 2.05 | 1.01 | NaN  | 0.96 |
| P11388 | DNA topoisomerase 2-alpha                                                                          | TOP2A    | 1247 | S | 1     | 178.2 | 1.77 | 2.47 | 2.43 | 5.01 | 4.62 | 3.56 | 1.08 | 0.88 | NaN  |
| P11388 | DNA topoisomerase 2-alpha                                                                          | TOP2A    | 1377 | S | 1     | 173.4 | 1.69 | NaN  | 1.68 | 2.54 | 2.23 | 2.56 | 1.33 | 1.29 | 1.34 |
| P11388 | DNA topoisomerase 2-alpha                                                                          | TOP2A    | 1525 | S | 1     | 173.3 | 1.21 | 1.22 | 1.27 | 1.95 | NaN  | 1.99 | 1.00 | 1.06 | 1.00 |
| P11717 | Cation-independent mannose-6-phosphate receptor                                                    | IGF2R    | 2409 | S | 1     | 224.4 | 1.22 | 1.28 | 1.32 | 1.31 | 1.39 | 1.20 | 1.10 | 1.09 | 1.11 |
| P11717 | Cation-independent mannose-6-phosphate receptor                                                    | IGF2R    | 2484 | S | 1     | 331.7 | 1.05 | 1.06 | 1.10 | 1.07 | 1.09 | 1.03 | 1.00 | 0.98 | 1.02 |
| P11831 | Serum response factor                                                                              | SRF      | 224  | S | 0.998 | 275.9 | 1.23 | 1.42 | 0.80 | 1.03 | 1.09 | 1.07 | 1.22 | 1.30 | 1.27 |
| P12931 | Proto-oncogene tyrosine-protein kinase Src                                                         | SRC      | 17   | S | 1     | 185.2 | NaN  | 1.08 | 0.81 | 1.04 | 1.05 | 0.53 | 1.11 | 1.17 | 1.00 |
| P13051 | Uracil-DNA glycosylase                                                                             | UNG      | 23   | S | 1     | 107.2 | 0.42 | NaN  | NaN  | NaN  | NaN  | NaN  | 0.65 | 0.61 | NaN  |
| P13861 | cAMP-dependent protein kinase type II-alpha regulatory                                             | PRKAR2A  | 78   | S | 1     | 254.9 | 1.00 | 0.34 | 0.35 | 0.33 | 0.30 | 0.51 | 0.67 | 1.20 | 1.22 |
| P13861 | cAMP-dependent protein kinase type II-alpha regulatory                                             | PRKAR2A  | 80   | S | 1     | 254.9 | 1.00 | 1.02 | 1.01 | 0.86 | 0.86 | 0.92 | 1.12 | 0.61 | 0.78 |

|        |                                                                                                                                                                                                   |         |      |   |       |       |      |      |      |      |      |      |      |      |      |      |
|--------|---------------------------------------------------------------------------------------------------------------------------------------------------------------------------------------------------|---------|------|---|-------|-------|------|------|------|------|------|------|------|------|------|------|
| P13861 | cAMP-dependent protein kinase type II-alpha regulatory                                                                                                                                            | PRKAR2A | 99   | S | 1     | 123.6 | 1.60 | 1.37 | NaN  | 2.34 | NaN  | 2.06 | 1.64 | 1.48 | 1.31 |      |
| P13994 | Coiled-coil domain-containing protein 130                                                                                                                                                         | CCDC130 | 362  | S | 0.995 | 88.87 | 0.56 | 0.54 | 0.45 | 0.65 | 0.66 | NaN  | 0.67 | 0.89 | 0.81 |      |
| P14625 | Endoplasmic reticulum chaperone protein;N-acetyllactosamine synthase;Beta-N-acetylglucosaminylglycopeptide beta-1,4-galactosyltransferase 1;Lactose synthase A                                    | HSP90B1 | 306  | S | 1     | 235.2 | 1.07 | 0.52 | 0.80 | 0.82 | 0.84 | 0.80 | NaN  | NaN  | 0.52 |      |
| Q86XA6 | protein;N-acetyllactosamine synthase;Beta-N-acetylglucosaminylglycopeptide beta-1,4-galactosyltransferase;Beta-N-acetylglucosaminyl-glycolipid beta-1,4-galactosyltransferase;Processed beta-1,4- | B4GALT1 | 74   | S | 0.882 | 149   | NaN  | NaN  | NaN  | NaN  | NaN  | NaN  | NaN  | NaN  | 0.81 | 0.94 |
| P15407 | Fos-related antigen 1                                                                                                                                                                             | FOSL1   | 101  | S | 1     | 76    | NaN  | NaN  | NaN  | 4.13 | 4.30 | NaN  | NaN  | NaN  | NaN  |      |
| P16383 | GC-rich sequence DNA-binding factor 2                                                                                                                                                             | GCFC2   | 429  | S | 0.898 | 106.2 | 0.81 | 0.79 | 0.81 | NaN  | 0.89 | 0.85 | 0.53 | 0.56 | 0.58 |      |
| P16383 | GC-rich sequence DNA-binding factor 2                                                                                                                                                             | GCFC2   | 430  | S | 0.944 | 106.2 | 0.81 | 0.79 | 0.81 | NaN  | 0.78 | 0.76 | 0.53 | 0.56 | 0.58 |      |
| P16989 | Y-box-binding protein 3                                                                                                                                                                           | YBX3    | 38   | S | 0.603 | 178.8 | 1.07 | 1.71 | 1.25 | NaN  | NaN  | 1.45 | NaN  | NaN  | 1.24 |      |
| P17096 | High mobility group protein HMG-I/HMG-Y                                                                                                                                                           | HMGA1   | 99   | S | 1     | 255.6 | 1.18 | 1.15 | 1.06 | 1.01 | 0.62 | 1.01 | 0.94 | 0.63 | 0.97 |      |
| P17096 | High mobility group protein HMG-I/HMG-Y                                                                                                                                                           | HMGA1   | 102  | S | 1     | 255.6 | 0.59 | 0.56 | 0.57 | 0.68 | 0.62 | 0.37 | 0.92 | 0.91 | 0.99 |      |
| P17096 | High mobility group protein HMG-I/HMG-Y                                                                                                                                                           | HMGA1   | 103  | S | 1     | 255.6 | 0.59 | 0.56 | 0.57 | 0.68 | 0.63 | 0.59 | 0.92 | 0.90 | 0.58 |      |
| P17096 | High mobility group protein HMG-I/HMG-Y                                                                                                                                                           | HMGA1   | 36   | S | 0.999 | 129.1 | 3.37 | 3.42 | 3.15 | 6.22 | 6.04 | 5.84 | 0.95 | 0.96 | 0.91 |      |
| P17252 | Protein kinase C alpha type                                                                                                                                                                       | PRKCA   | 226  | S | 0.908 | 170   | 1.78 | 2.11 | NaN  | 1.62 | 1.60 | NaN  | 0.76 | 0.68 | 0.60 |      |
| P17252 | Protein kinase C alpha type                                                                                                                                                                       | PRKCA   | 319  | S | 0.985 | 81.53 | NaN  | NaN  | 1.82 | 2.29 | 2.28 | NaN  | 1.28 | 1.40 | 1.44 |      |
| P17275 | Transcription factor jun-B                                                                                                                                                                        | JUNB    | 259  | S | 1     | 140.3 | 4.31 | NaN  | NaN  | 0.99 | NaN  | 1.22 | NaN  | 5.63 | 5.63 |      |
| P17535 | Transcription factor jun-D                                                                                                                                                                        | JUND    | 255  | S | 0.997 | 111.6 | 0.13 | 0.40 | 0.32 | 0.50 | 0.52 | 0.39 | 0.36 | 0.45 | 0.19 |      |
| P17535 | Transcription factor jun-D                                                                                                                                                                        | JUND    | 259  | S | 1     | 107   | 0.39 | 0.40 | 0.32 | 0.95 | 0.94 | 0.82 | 0.36 | 0.35 | 0.36 |      |
| P18031 | Tyrosine-protein phosphatase non-receptor type 1                                                                                                                                                  | PTPN1   | 50   | S | 1     | 68.11 | 1.74 | 1.32 | 1.69 | NaN  | 1.30 | 1.10 | 1.11 | 1.42 | 1.37 |      |
| P18206 | Vinculin                                                                                                                                                                                          | VCL     | 290  | S | 1     | 126.2 | 0.95 | 1.01 | 0.89 | 1.07 | 1.04 | 0.99 | 0.96 | 1.05 | 1.00 |      |
| P18206 | Vinculin                                                                                                                                                                                          | VCL     | 346  | S | 0.999 | 177.4 | 0.80 | 2.57 | 1.13 | 2.13 | 2.10 | NaN  | NaN  | 1.09 | NaN  |      |
| P18206 | Vinculin                                                                                                                                                                                          | VCL     | 721  | S | 1     | 99.07 | 2.83 | 3.23 | 3.29 | 3.08 | 3.19 | 2.98 | 1.91 | 1.63 | 1.92 |      |
| P18206 | Vinculin                                                                                                                                                                                          | VCL     | 820  | S | 0.92  | 81.55 | 1.18 | NaN  | 1.28 | 1.31 | 1.34 | 1.21 | 1.06 | NaN  | 1.08 |      |
| P18583 | Protein SON                                                                                                                                                                                       | SON     | 1697 | S | 1     | 152.3 | 1.75 | 1.62 | 1.64 | 1.27 | 1.45 | 1.31 | 1.18 | 1.26 | 1.22 |      |
| P18583 | Protein SON                                                                                                                                                                                       | SON     | 1556 | S | 0.998 | 219.8 | 1.02 | 1.00 | 0.92 | 1.00 | 0.92 | 1.17 | 0.78 | 0.76 | 0.80 |      |
| P18583 | Protein SON                                                                                                                                                                                       | SON     | 2129 | S | 0.905 | 43.35 | 1.08 | 1.30 | NaN  | NaN  | NaN  | NaN  | NaN  | NaN  | NaN  |      |
| P18583 | Protein SON                                                                                                                                                                                       | SON     | 2011 | S | 1     | 59.29 | 0.57 | 1.50 | NaN  | NaN  | 1.14 | NaN  | NaN  | NaN  | NaN  |      |
| P18583 | Protein SON                                                                                                                                                                                       | SON     | 2013 | S | 1     | 74.53 | NaN  | 0.46 | NaN  | 0.60 | 0.66 | 0.82 | NaN  | 0.41 | NaN  |      |

|        |                                                                              |           |         |   |       |       |      |      |      |      |      |      |      |      |      |
|--------|------------------------------------------------------------------------------|-----------|---------|---|-------|-------|------|------|------|------|------|------|------|------|------|
| P18583 | Protein SON                                                                  | SON       | 283     | S | 0.998 | 187.1 | 1.27 | NaN  | 1.18 | NaN  | 1.26 | 1.24 | 1.01 | 1.05 | NaN  |
| P18669 | Phosphoglycerate mutase 1                                                    | PGAM1     | 31      | S | 1     | 89.51 | 1.06 | 0.90 | NaN  | 1.15 | 1.27 | NaN  | 0.93 | NaN  | NaN  |
| P18669 | Phosphoglycerate mutase 1;Probable phosphoglycerate mutase 4                 | PGAM1     | 118     | S | 1     | 124.3 | 0.81 | 0.79 | 0.82 | 0.95 | 1.00 | 0.98 | 0.69 | 0.67 | 0.71 |
| P18858 | DNA ligase 1;DNA ligase                                                      | LIG1      | 91      | S | 0.975 | 87.9  | 0.71 | NaN  | NaN  | NaN  | 0.71 | 0.69 | NaN  | NaN  | NaN  |
| P18858 | DNA ligase 1;DNA ligase                                                      | LIG1      | 98      | S | 0.816 | 78.65 | 0.71 | NaN  | NaN  | NaN  | 0.71 | 0.69 | NaN  | NaN  | NaN  |
| P18858 | DNA ligase 1;DNA ligase                                                      | LIG1      | 911     | S | 0.994 | 94.06 | NaN  | NaN  | NaN  | 1.28 | 1.04 | NaN  | NaN  | NaN  | NaN  |
| P18858 | DNA ligase 1;DNA ligase                                                      | LIG1      | 913     | S | 0.994 | 94.06 | NaN  | NaN  | NaN  | 1.28 | 1.04 | NaN  | NaN  | NaN  | NaN  |
| P18858 | DNA ligase 1;DNA ligase                                                      | LIG1      | 141     | S | 1     | 165.5 | 0.94 | NaN  | 6.77 | NaN  | NaN  | NaN  | NaN  | NaN  | NaN  |
| P18858 | DNA ligase 1;DNA ligase                                                      | LIG1      | 66      | S | 1     | 244.7 | 0.77 | 0.69 | 0.72 | 0.48 | 0.47 | 0.45 | 0.77 | 0.82 | 0.76 |
| P18858 | DNA ligase 1;DNA ligase                                                      | LIG1      | 76      | S | 1     | 244.7 | 0.35 | 0.45 | 0.41 | 0.76 | 0.60 | 0.59 | 0.48 | 0.52 | 0.58 |
| P19634 | Sodium/hydrogen exchanger 1                                                  | SLC9A1    | 703     | S | 1     | 102.7 | NaN  | NaN  | NaN  | NaN  | NaN  | NaN  | NaN  | 1.42 | 1.51 |
| P19634 | Sodium/hydrogen exchanger 1                                                  | SLC9A1    | 693     | S | 0.996 | 54.54 | 0.98 | 1.07 | NaN  | 0.88 | NaN  | 1.09 | 1.19 | 1.10 | 1.14 |
| P19634 | Sodium/hydrogen exchanger 1                                                  | SLC9A1    | 785     | S | 0.864 | 111.8 | 0.82 | 0.83 | 0.79 | NaN  | NaN  | 0.71 | 1.05 | 1.16 | 0.83 |
| P19838 | Nuclear factor NF-kappa-B p105 subunit;Nuclear factor NF-kappa-B p50 subunit | NFKB1     | 893     | S | 0.974 | 77.89 | 0.97 | 0.85 | NaN  | NaN  | 1.30 | NaN  | NaN  | 0.57 | NaN  |
| P20700 | Lamin-B1                                                                     | LMNB1     | 23      | S | 0.937 | 107.5 | NaN  | 1.96 | 1.69 | NaN  | NaN  | NaN  | NaN  | NaN  | 0.75 |
| Q03252 | Lamin-B1;Lamin-B2                                                            | LMNB1     | 391;405 | S | 0.998 | 84.37 | 0.53 | 0.59 | 0.62 | 0.90 | 0.96 | 0.89 | 0.92 | 0.86 | 1.16 |
| Q03252 | Lamin-B1;Lamin-B2                                                            | LMNB1     | 393;407 | S | 0.993 | 84.37 | 0.42 | 0.45 | NaN  | 0.66 | 0.64 | 0.64 | 1.11 | 0.83 | 1.12 |
| Q03252 | Lamin-B1;Lamin-B2                                                            | LMNB1     | 396;410 | S | 0.999 | 77.63 | 1.79 | 1.30 | 1.49 | 2.43 | 2.64 | NaN  | NaN  | 0.69 | 1.09 |
| Q60FE5 | Filamin-A                                                                    | FLNA      | 2125    | S | 1     | 146.3 | 1.30 | 1.33 | 1.31 | 1.29 | 1.31 | NaN  | 1.19 | 1.12 | 1.08 |
| Q60FE5 | Filamin-A                                                                    | FLNA      | 1432    | S | 1     | 159   | 0.75 | 0.79 | 0.71 | 1.32 | 1.32 | 1.26 | 0.84 | 0.83 | 0.83 |
| Q60FE5 | Filamin-A                                                                    | FLNA      | 2300    | S | 0.961 | 78.31 | 1.64 | 1.78 | NaN  | NaN  | 2.11 | NaN  | NaN  | 0.90 | NaN  |
| Q60FE5 | Filamin-A                                                                    | FLNA      | 2153    | S | 0.938 | 141.9 | 1.16 | 1.17 | 1.22 | 1.51 | 1.30 | 1.39 | 0.78 | 0.84 | 0.81 |
| P22059 | Oxysterol-binding protein 1                                                  | OSBP      | 351     | S | 1     | 270.8 | 0.48 | 0.48 | 0.51 | 0.85 | 0.92 | 0.89 | 0.45 | 0.36 | 0.47 |
| P22059 | Oxysterol-binding protein 1                                                  | OSBP      | 190     | S | 1     | 211   | 0.85 | 0.80 | 0.80 | 0.90 | 1.12 | 0.90 | 0.75 | 0.84 | 0.77 |
| P22059 | Oxysterol-binding protein 1                                                  | OSBP      | 193     | S | 1     | 211   | 0.85 | 0.80 | 0.80 | 0.90 | 1.12 | 0.90 | 0.75 | 0.84 | 0.77 |
| P22059 | Oxysterol-binding protein 1                                                  | OSBP      | 240     | S | 0.998 | 76.42 | 3.25 | 3.21 | NaN  | NaN  | NaN  | NaN  | NaN  | NaN  | NaN  |
| Q5JRR6 | Ubiquitin-like modifier-activating enzyme 1                                  | UBA1      | 283     | S | 1     | 96.67 | 0.94 | 0.94 | 0.84 | 1.19 | 1.08 | 1.20 | 0.75 | 1.08 | 1.02 |
| P22626 | Heterogeneous nuclear ribonucleoproteins A2/B1                               | HNRNPA2B1 | 259     | S | 1     | 131.4 | 1.60 | NaN  | 1.75 | 2.04 | 2.34 | 2.21 | NaN  | 1.17 | 1.10 |
| P22626 | Heterogeneous nuclear ribonucleoproteins A2/B1                               | HNRNPA2B1 | 344     | S | 0.872 | 78.32 | NaN  | NaN  | 1.62 | 2.08 | 2.73 | NaN  | NaN  | NaN  | NaN  |
| P23381 | Tryptophan--tRNA ligase, cytoplasmic;T1-TrpRS;T2-TrpRS                       | WARS      | 467     | S | 1     | 76.83 | 0.89 | 0.79 | 1.23 | 0.82 | 0.80 | NaN  | 1.04 | 0.70 | NaN  |
| P24928 | DNA-directed RNA polymerase II subunit RPB1                                  | POLR2A    | 1913    | S | 0.922 | 83.69 | 0.52 | 0.54 | 0.63 | NaN  | NaN  | NaN  | NaN  | NaN  | 0.70 |
| P24928 | DNA-directed RNA polymerase II subunit RPB1                                  | POLR2A    | 1920    | S | 0.767 | 101.5 | NaN  | 0.84 | 0.63 | NaN  | NaN  | NaN  | NaN  | NaN  | NaN  |
| P24928 | DNA-directed RNA polymerase II subunit RPB1                                  | POLR2A    | 1878    | S | 0.994 | 110.5 | 0.94 | 0.80 | NaN  | NaN  | 0.92 | NaN  | NaN  | 0.98 | 0.90 |
| P26038 | Moesin                                                                       | MSN       | 576     | S | 1     | 105   | 0.77 | 0.63 | NaN  | 1.34 | 1.17 | 1.00 | NaN  | NaN  | NaN  |

|        |                                                                 |       |      |   |       |       |      |      |      |      |      |      |      |      |      |
|--------|-----------------------------------------------------------------|-------|------|---|-------|-------|------|------|------|------|------|------|------|------|------|
| P26358 | DNA (cytosine-5)-methyltransferase 1                            | DNMT1 | 714  | S | 1     | 259.6 | 0.26 | 0.25 | 0.27 | 0.52 | 0.55 | 0.49 | 0.34 | 0.33 | 0.34 |
| P26358 | DNA (cytosine-5)-methyltransferase 1                            | DNMT1 | 127  | S | 1     | 72.17 | NaN  | NaN  | NaN  | 0.87 | 0.68 | 0.96 | NaN  | NaN  | NaN  |
| P26368 | Splicing factor U2AF 65 kDa subunit                             | U2AF2 | 79   | S | 1     | 111.4 | 0.95 | 1.00 | 1.04 | 1.08 | 1.08 | 1.01 | 0.88 | 0.91 | 0.90 |
| P27816 | Microtubule-associated protein 4;Microtubule-associated protein | MAP4  | 358  | S | 1     | 127.2 | 0.58 | 0.56 | 0.60 | 1.04 | 1.06 | 1.05 | 0.62 | 0.64 | 0.67 |
| P27816 | Microtubule-associated protein 4;Microtubule-associated protein | MAP4  | 787  | S | 1     | 95.03 | 1.07 | 1.09 | 1.06 | 1.84 | 1.79 | 1.88 | 0.84 | 0.82 | 0.83 |
| P27816 | Microtubule-associated protein 4;Microtubule-associated protein | MAP4  | 789  | S | 0.842 | 74.85 | NaN  | NaN  | NaN  | 2.07 | 1.81 | 1.99 | 0.82 | 0.74 | 0.71 |
| P27816 | Microtubule-associated protein 4;Microtubule-associated protein | MAP4  | 280  | S | 1     | 223.3 | 0.54 | 0.53 | 0.49 | 0.73 | 0.75 | 0.76 | 0.58 | 0.53 | 0.56 |
| P27816 | Microtubule-associated protein 4;Microtubule-associated protein | MAP4  | 507  | S | 1     | 279.1 | 0.30 | 0.32 | 0.36 | 0.64 | 0.70 | 0.69 | 0.27 | 0.31 | 0.26 |
| P27816 | Microtubule-associated protein 4;Microtubule-associated protein | MAP4  | 510  | S | 0.998 | 150.1 | 0.74 | 0.74 | 0.94 | 1.70 | 1.86 | 1.50 | 0.67 | 0.33 | 0.62 |
| P27816 | Microtubule-associated protein 4;Microtubule-associated protein | MAP4  | 696  | S | 1     | 87.48 | 1.01 | 1.07 | 1.08 | 1.58 | 1.58 | 1.73 | 0.64 | 0.62 | 0.61 |
| P27816 | Microtubule-associated protein 4;Microtubule-associated protein | MAP4  | 624  | S | 0.919 | 106.8 | NaN  | NaN  | NaN  | 0.91 | 1.13 | 1.52 | 0.66 | NaN  | 0.77 |
| P27816 | Microtubule-associated protein 4;Microtubule-associated protein | MAP4  | 636  | S | 1     | 128.4 | 0.70 | 0.79 | 0.80 | 2.03 | 1.75 | 1.76 | 1.05 | 0.91 | 0.87 |
| P27816 | Microtubule-associated protein 4;Microtubule-associated protein | MAP4  | 1073 | S | 1     | 133.9 | 0.65 | 0.63 | 0.64 | 0.64 | 0.58 | 0.58 | 2.06 | 2.09 | 1.92 |
| P27824 | Calnexin                                                        | CANX  | 583  | S | 1     | 367.3 | 1.21 | 1.19 | 1.01 | 1.08 | 1.10 | 1.08 | 1.01 | 0.97 | 1.06 |
| P27824 | Calnexin                                                        | CANX  | 554  | S | 1     | 430.6 | 0.82 | 0.84 | 0.79 | 0.86 | 0.82 | 0.81 | 0.91 | 0.87 | 0.95 |
| P27824 | Calnexin                                                        | CANX  | 564  | S | 1     | 298.7 | 0.91 | 0.98 | 0.95 | 0.80 | 0.81 | 0.75 | 0.97 | 1.04 | 1.52 |
| P28066 | Proteasome subunit alpha type-5                                 | PSMA5 | 16   | S | 0.998 | 111   | 4.12 | 4.16 | 3.85 | 6.45 | 4.84 | 4.89 | 1.17 | 0.90 | 1.05 |
| P28066 | Proteasome subunit alpha type-5                                 | PSMA5 | 56   | S | 0.974 | 70.63 | NaN  | NaN  | NaN  | NaN  | NaN  | NaN  | NaN  | 0.54 | 1.06 |
| P28290 | Sperm-specific antigen 2                                        | SSFA2 | 641  | S | 1     | 122.9 | 0.74 | 0.81 | 0.85 | 0.89 | 0.88 | 0.83 | 1.14 | 1.25 | 1.17 |
| P28290 | Sperm-specific antigen 2                                        | SSFA2 | 591  | S | 0.543 | 119.3 | 1.04 | 0.78 | 0.93 | NaN  | 0.90 | 0.79 | 1.23 | NaN  | 1.33 |
| P28290 | Sperm-specific antigen 2                                        | SSFA2 | 593  | S | 0.764 | 119.3 | 1.15 | 0.92 | 0.93 | 1.10 | 1.12 | 1.16 | 1.23 | 1.14 | 1.33 |
| P28290 | Sperm-specific antigen 2                                        | SSFA2 | 668  | S | 0.998 | 97.73 | 1.37 | 1.56 | 1.50 | 1.19 | NaN  | 1.22 | 2.69 | 2.03 | 2.42 |

|        |                                               |         |      |   |       |       |      |      |      |      |      |      |      |      |      |
|--------|-----------------------------------------------|---------|------|---|-------|-------|------|------|------|------|------|------|------|------|------|
| P28290 | Sperm-specific antigen 2                      | SSFA2   | 739  | S | 1     | 142.5 | 2.39 | NaN  | 0.90 | 0.79 | 0.55 | NaN  | 2.01 | NaN  | 1.86 |
| P29317 | Ephrin type-A receptor 2                      | EPHA2   | 901  | S | 0.913 | 48.28 | NaN  | NaN  | 1.49 | NaN  | NaN  | 1.31 | 1.23 | 1.14 | NaN  |
| P29590 | Protein PML                                   | PML     | 36   | S | 0.998 | 112.3 | 0.70 | 0.68 | 0.95 | NaN  | 0.68 | NaN  | NaN  | 1.36 | 1.34 |
| P29966 | Myristoylated alanine-rich C-kinase substrate | MARCKS  | 145  | S | 1     | 289.1 | 0.63 | 0.63 | 0.67 | 0.68 | 0.67 | 0.68 | 1.12 | 1.15 | 1.09 |
| P29966 | Myristoylated alanine-rich C-kinase substrate | MARCKS  | 147  | S | 0.879 | 204.5 | NaN  | 3.23 | 2.16 | 1.74 | 1.70 | 3.55 | 2.15 | 1.83 | 3.63 |
| P29966 | Myristoylated alanine-rich C-kinase substrate | MARCKS  | 118  | S | 0.997 | 206.1 | 2.30 | 2.36 | 2.21 | 2.23 | 2.44 | 2.22 | 1.06 | 1.05 | 1.04 |
| P29966 | Myristoylated alanine-rich C-kinase substrate | MARCKS  | 128  | S | 0.993 | 94.15 | 0.68 | 1.14 | 0.78 | 0.68 | NaN  | NaN  | NaN  | NaN  | NaN  |
| P29966 | Myristoylated alanine-rich C-kinase substrate | MARCKS  | 131  | S | 0.909 | 94.15 | 0.68 | 1.14 | 0.78 | 0.68 | NaN  | NaN  | NaN  | 2.05 | NaN  |
| P29966 | Myristoylated alanine-rich C-kinase substrate | MARCKS  | 132  | S | 0.751 | 94.15 | NaN  | 1.14 | 1.39 | 0.68 | NaN  | NaN  | NaN  | 0.94 | NaN  |
| P29966 | Myristoylated alanine-rich C-kinase substrate | MARCKS  | 135  | S | 0.953 | 206.1 | 0.88 | 0.75 | 0.76 | 0.87 | 0.74 | 0.82 | 0.84 | 1.06 | 1.05 |
| P29966 | Myristoylated alanine-rich C-kinase substrate | MARCKS  | 81   | S | 0.876 | 248.8 | 2.33 | 2.06 | NaN  | 3.13 | NaN  | 4.03 | NaN  | NaN  | 1.05 |
| P29966 | Myristoylated alanine-rich C-kinase substrate | MARCKS  | 26   | S | 0.748 | 138.2 | NaN  | NaN  | 1.12 | NaN  | 1.46 | 1.28 | 1.12 | 1.09 | NaN  |
| P29966 | Myristoylated alanine-rich C-kinase substrate | MARCKS  | 27   | S | 0.988 | 226.7 | 1.54 | 1.45 | 1.28 | 1.30 | NaN  | 1.32 | 1.04 | NaN  | 1.20 |
| P29966 | Myristoylated alanine-rich C-kinase substrate | MARCKS  | 101  | S | 1     | 208.4 | 2.53 | 2.73 | 3.00 | 3.94 | 4.04 | 3.81 | 1.12 | 1.02 | 1.01 |
| P29966 | Myristoylated alanine-rich C-kinase substrate | MARCKS  | 46   | S | 1     | 158.9 | 1.39 | 1.44 | 1.50 | 2.08 | 2.02 | 1.96 | 1.26 | 1.23 | 1.22 |
| P30050 | 60S ribosomal protein L12                     | RPL12   | 38   | S | 1     | 72.29 | 1.37 | 1.43 | 1.57 | 2.30 | 2.08 | 2.02 | 0.50 | 0.45 | 0.46 |
| P30419 | Glycylpeptide N-tetradecanoyltransferase 1    | NMT1    | 47   | S | 1     | 160.9 | NaN  | NaN  | NaN  | 1.15 | 1.09 | 1.06 | NaN  | NaN  | NaN  |
| P31629 | Transcription factor HIVEP2                   | HIVEP2  | 1443 | S | 0.998 | 83.69 | 0.40 | 0.49 | NaN  | NaN  | NaN  | NaN  | NaN  | 0.41 | NaN  |
| P31689 | DnaJ homolog subfamily A member 1             | DNAJA1  | 335  | S | 1     | 149.7 | 3.65 | 4.35 | 5.08 | 5.72 | 5.64 | 5.50 | 0.68 | 0.73 | 0.88 |
| P31749 | RAC-alpha serine/threonine-protein kinase     | AKT1    | 122  | S | 0.544 | 74.4  | NaN  | NaN  | 0.99 | 0.86 | NaN  | 0.95 | NaN  | 0.85 | NaN  |
| P31749 | RAC-alpha serine/threonine-protein kinase     | AKT1    | 124  | S | 0.997 | 149.9 | 0.53 | 0.46 | 0.47 | 0.60 | 1.04 | 0.60 | 0.53 | 0.53 | 0.59 |
| P31749 | RAC-alpha serine/threonine-protein kinase     | AKT1    | 126  | S | 0.989 | 74.4  | NaN  | NaN  | 0.99 | 0.86 | 1.04 | 0.95 | 0.83 | 0.85 | 0.84 |
| P31749 | RAC-alpha serine/threonine-protein kinase     | AKT1    | 129  | S | 0.999 | 74.4  | NaN  | NaN  | 0.99 | 0.86 | 1.04 | 0.95 | 0.83 | 0.85 | 0.84 |
| P31942 | Heterogeneous nuclear ribonucleoprotein H3    | HNRNPH3 | 216  | S | 1     | 61.54 | 2.35 | 2.26 | NaN  | NaN  | 2.49 | NaN  | NaN  | NaN  | NaN  |
| P33981 | Dual specificity protein kinase TTK           | TTK     | 821  | S | 0.999 | 118.2 | 2.61 | 1.38 | NaN  | 4.46 | 3.17 | 3.84 | NaN  | NaN  | NaN  |
| P35251 | Replication factor C subunit 1                | RFC1    | 69   | S | 0.999 | 92.1  | 0.72 | NaN  | NaN  | NaN  | 0.94 | 0.72 | 1.08 | NaN  | 1.12 |
| P35251 | Replication factor C subunit 1                | RFC1    | 71   | S | 0.951 | 92.1  | 0.72 | NaN  | NaN  | NaN  | 0.94 | 0.72 | 1.08 | NaN  | 1.12 |



|        |                                                                                                                                                      |        |      |   |       |       |      |      |      |      |      |      |      |      |      |
|--------|------------------------------------------------------------------------------------------------------------------------------------------------------|--------|------|---|-------|-------|------|------|------|------|------|------|------|------|------|
| P35367 | Histamine H1 receptor                                                                                                                                | HRH1   | 275  | S | 0.825 | 78.38 | 0.66 | 4.14 | 4.02 | NaN  | NaN  | 2.47 | NaN  | NaN  | NaN  |
| P35568 | Insulin receptor substrate 1                                                                                                                         | IRS1   | 1078 | S | 1     | 83.78 | 0.77 | 0.78 | 0.64 | 0.97 | NaN  | 1.04 | 0.86 | NaN  | 0.83 |
| P35579 | Myosin-9                                                                                                                                             | MYH9   | 1943 | S | 1     | 362.9 | 0.81 | 0.83 | 0.76 | 0.82 | 0.81 | 0.80 | 1.02 | 1.04 | 1.03 |
| P35579 | Myosin-9                                                                                                                                             | MYH9   | 1713 | S | 0.5   | 75.54 | 1.10 | 1.14 | NaN  | NaN  | NaN  | NaN  | NaN  | NaN  | 2.16 |
| P35579 | Myosin-9                                                                                                                                             | MYH9   | 1714 | S | 0.5   | 75.54 | 1.10 | 1.14 | NaN  | NaN  | NaN  | NaN  | NaN  | NaN  | 2.16 |
| P35580 | Myosin-10                                                                                                                                            | MYH10  | 1952 | S | 1     | 98.8  | 0.73 | 0.74 | NaN  | 0.77 | 0.82 | NaN  | 1.30 | NaN  | NaN  |
| P35580 | Myosin-10                                                                                                                                            | MYH10  | 1956 | S | 1     | 282.6 | 0.80 | 0.85 | 0.81 | 0.81 | 0.84 | 0.77 | 0.93 | 0.92 | 0.87 |
| P36507 | Dual specificity mitogen-activated protein kinase kinase 2                                                                                           | MAP2K2 | 293  | S | 0.746 | 134.6 | NaN  | NaN  | 1.68 | 1.78 | 1.87 | 1.81 | 0.93 | 0.99 | NaN  |
| P36507 | Dual specificity mitogen-activated protein kinase kinase 2                                                                                           | MAP2K2 | 295  | S | 0.994 | 207.4 | 1.74 | 1.90 | NaN  | 1.89 | NaN  | 1.81 | 0.99 | 1.08 | NaN  |
| P38159 | RNA-binding motif protein, X chromosome; RNA-binding motif protein, X chromosome, N-terminally processed; RNA binding motif protein, X-linked-like-1 | RBMX   | 208  | S | 1     | 112.1 | 0.81 | 0.80 | 0.80 | 0.93 | 0.96 | 0.95 | 0.85 | 0.85 | 0.87 |
| P38159 | RNA-binding motif protein, X chromosome; RNA-binding motif protein, X chromosome, N-terminally processed                                             | RBMX   | 352  | S | 1     | 66.6  | NaN  | 0.78 | NaN  | 0.93 | NaN  | 0.81 | NaN  | 1.05 | 0.87 |
| P38432 | Coilin                                                                                                                                               | COIL   | 566  | S | 0.934 | 82.2  | NaN  | NaN  | NaN  | 1.54 | NaN  | 1.05 | 0.98 | 0.83 | 0.97 |
| P40222 | Alpha-taxilin                                                                                                                                        | TXLNA  | 515  | S | 0.993 | 124.5 | 1.53 | 1.65 | 1.63 | 1.48 | 1.46 | 1.53 | 1.06 | 1.05 | 1.11 |
| P40222 | Alpha-taxilin                                                                                                                                        | TXLNA  | 19   | S | 0.788 | 119.8 | 1.44 | 1.10 | NaN  | NaN  | 2.06 | NaN  | NaN  | NaN  | NaN  |
| P40818 | Ubiquitin carboxyl-terminal hydrolase 8                                                                                                              | USP8   | 718  | S | 0.99  | 115.4 | NaN  | 2.28 | 1.92 | 2.07 | 2.10 | 1.86 | 1.77 | 2.10 | 2.29 |
| P41208 | Centrin-2                                                                                                                                            | CETN2  | 20   | S | 1     | 62.53 | 1.04 | 0.78 | NaN  | 1.11 | 1.18 | NaN  | NaN  | NaN  | NaN  |
| P41227 | N-alpha-acetyltransferase 10                                                                                                                         | NAA10  | 205  | S | 0.999 | 197.6 | 0.80 | 0.95 | 0.95 | 2.05 | 1.30 | 0.96 | NaN  | NaN  | 0.83 |
| P41227 | N-alpha-acetyltransferase 10                                                                                                                         | NAA10  | 209  | S | 0.585 | 169.2 | NaN  | NaN  | NaN  | NaN  | NaN  | NaN  | 0.95 | 1.00 | NaN  |
| P41227 | N-alpha-acetyltransferase 10                                                                                                                         | NAA10  | 186  | S | 1     | 85.36 | 0.97 | 0.90 | 1.02 | 1.16 | 1.29 | 1.21 | 0.88 | 0.77 | 0.91 |
| P42684 | Abelson tyrosine-protein kinase 2                                                                                                                    | ABL2   | 631  | S | 0.972 | 51.01 | 0.80 | 0.85 | 0.94 | 1.09 | 1.00 | NaN  | 0.89 | 0.89 | NaN  |
| P42684 | Abelson tyrosine-protein kinase 2                                                                                                                    | ABL2   | 936  | S | 0.987 | 70.49 | 1.60 | 1.58 | NaN  | NaN  | NaN  | NaN  | NaN  | NaN  | NaN  |
| P42858 | Huntingtin                                                                                                                                           | HTT    | 1199 | S | 0.996 | 44.42 | 1.00 | NaN  | NaN  | NaN  | 1.04 | NaN  | 0.82 | 0.75 | 0.77 |
| P42858 | Huntingtin                                                                                                                                           | HTT    | 432  | S | 0.977 | 123.5 | 0.92 | 0.81 | 0.96 | 0.83 | 0.82 | 0.93 | 1.13 | 1.20 | 1.39 |
| P43490 | Nicotinamide phosphoribosyltransferase                                                                                                               | NAMPT  | 472  | S | 1     | 90.15 | 1.77 | 1.35 | 1.39 | 2.45 | 2.00 | 2.05 | 1.09 | 1.09 | 1.03 |
| P46013 | Antigen KI-67                                                                                                                                        | MKI67  | 827  | S | 0.998 | 70.94 | NaN  | NaN  | 0.58 | 1.27 | 1.48 | 1.66 | NaN  | NaN  | NaN  |
| P46013 | Antigen KI-67                                                                                                                                        | MKI67  | 2105 | S | 1     | 62.66 | NaN  | NaN  | NaN  | NaN  | 1.68 | 2.16 | NaN  | NaN  | NaN  |
| P46013 | Antigen KI-67                                                                                                                                        | MKI67  | 1131 | S | 1     | 84.13 | 0.54 | 0.54 | 0.75 | 1.95 | 1.92 | NaN  | 0.62 | 0.55 | 0.58 |
| P46013 | Antigen KI-67                                                                                                                                        | MKI67  | 1861 | S | 0.998 | 71.69 | NaN  | NaN  | NaN  | 1.75 | 2.04 | 1.59 | NaN  | NaN  | NaN  |
| P46013 | Antigen KI-67                                                                                                                                        | MKI67  | 1376 | S | 0.826 | 133.9 | NaN  | NaN  | NaN  | NaN  | 1.52 | 2.07 | NaN  | NaN  | NaN  |
| P46013 | Antigen KI-67                                                                                                                                        | MKI67  | 308  | S | 1     | 117.1 | 0.49 | 0.45 | 0.47 | 1.02 | 1.04 | 1.13 | 0.68 | 0.72 | 0.66 |
| P46013 | Antigen KI-67                                                                                                                                        | MKI67  | 357  | S | 1     | 80.6  | NaN  | NaN  | NaN  | NaN  | 1.25 | 1.60 | NaN  | 0.59 | NaN  |

|        |                                                                          |         |      |   |       |       |      |      |      |      |      |      |      |      |      |
|--------|--------------------------------------------------------------------------|---------|------|---|-------|-------|------|------|------|------|------|------|------|------|------|
| P46060 | Ran GTPase-activating protein 1                                          | RANGAP1 | 428  | S | 0.851 | 73.03 | 1.58 | NaN  | 1.40 | NaN  | 3.07 | 2.97 | 0.77 | 0.82 | 0.68 |
| P46060 | Ran GTPase-activating protein 1<br>Probable 28S rRNA                     | RANGAP1 | 442  | S | 1     | 92.82 | 0.55 | NaN  | 0.44 | 0.86 | 0.80 | 0.86 | 0.73 | 0.82 | 0.88 |
| P46087 | (cytosine(4447)-C(5))-methyltransferase<br>Probable 28S rRNA             | NOP2    | 786  | S | 0.849 | 85.4  | NaN  | 1.42 | 1.33 | NaN  | NaN  | 1.97 | NaN  | NaN  | NaN  |
| P46087 | (cytosine(4447)-C(5))-methyltransferase                                  | NOP2    | 732  | S | 0.975 | 106.5 | 1.23 | 0.85 | 1.37 | 1.39 | 1.55 | 1.57 | NaN  | NaN  | NaN  |
| P46100 | Transcriptional regulator                                                | ATRX    | 849  | S | 1     | 77.53 | 0.51 | 0.49 | 0.57 | 0.65 | 0.64 | 0.65 | 0.82 | 0.91 | 0.90 |
| P46100 | Transcriptional regulator                                                | ATRX    | 850  | S | 1     | 77.53 | 0.51 | 0.49 | 0.57 | 0.65 | 0.64 | 0.65 | 0.82 | 0.91 | 0.90 |
| P46100 | Transcriptional regulator                                                | ATRX    | 1527 | S | 0.984 | 109.9 | 0.25 | NaN  | NaN  | 0.83 | 0.79 | 0.74 | 0.53 | 0.51 | 0.57 |
| P46100 | Transcriptional regulator                                                | ATRX    | 594  | S | 0.631 | 59.16 | NaN  | NaN  | NaN  | 0.91 | 1.10 | NaN  | 0.67 | 0.72 | NaN  |
| P46100 | Transcriptional regulator                                                | ATRX    | 598  | S | 0.741 | 72.79 | 0.54 | 0.59 | NaN  | NaN  | NaN  | NaN  | 0.86 | NaN  | NaN  |
| P46100 | Transcriptional regulator                                                | ATRX    | 729  | S | 1     | 179.1 | 0.45 | 0.76 | 0.47 | 0.62 | 0.67 | 0.63 | 0.58 | 0.60 | 0.69 |
| P46100 | Transcriptional regulator                                                | ATRX    | 731  | S | 1     | 179.1 | 0.45 | 0.38 | 0.47 | 0.62 | 0.67 | 0.63 | 0.58 | 0.60 | 0.69 |
| P46100 | Transcriptional regulator                                                | ATRX    | 675  | S | 0.869 | 108.5 | NaN  | NaN  | NaN  | NaN  | NaN  | NaN  | NaN  | 0.66 | 0.63 |
| P46100 | Transcriptional regulator                                                | ATRX    | 677  | S | 0.999 | 108.5 | 0.61 | 0.55 | NaN  | NaN  | 0.71 | NaN  | 0.81 | NaN  | 0.63 |
| P46100 | Transcriptional regulator                                                | ATRX    | 92   | S | 1     | 250.1 | 0.53 | 0.29 | 0.64 | 0.51 | 0.71 | 0.63 | 0.53 | 0.61 | 0.48 |
| P46821 | Microtubule-associated protein 1B;MAP1B heavy chain;MAP1 light chain LC1 | MAP1B   | 541  | S | 0.971 | 78.72 | NaN  | 0.48 | 0.55 | 0.45 | 0.37 | 0.44 | 1.27 | 1.23 | 1.28 |
| P46821 | Microtubule-associated protein 1B;MAP1B heavy chain;MAP1 light chain LC1 | MAP1B   | 1016 | S | 1     | 157.4 | NaN  | 0.45 | 0.55 | 0.82 | 0.64 | 0.64 | 1.04 | 0.93 | 0.93 |
| P46821 | Microtubule-associated protein 1B;MAP1B heavy chain;MAP1 light chain LC1 | MAP1B   | 1376 | S | 0.561 | 116.4 | 0.49 | 0.47 | 0.56 | 0.54 | 0.60 | 0.67 | 0.37 | 0.34 | 0.49 |
| P46821 | Microtubule-associated protein 1B;MAP1B heavy chain;MAP1 light chain LC1 | MAP1B   | 1378 | S | 1     | 272.3 | 0.54 | 0.50 | 0.42 | 0.53 | 0.55 | 0.56 | 0.48 | 0.43 | 0.60 |
| P46821 | Microtubule-associated protein 1B;MAP1B heavy chain;MAP1 light chain LC1 | MAP1B   | 1387 | S | 0.95  | 253.7 | 0.96 | 0.72 | NaN  | NaN  | 1.77 | 1.10 | NaN  | NaN  | NaN  |
| P46821 | Microtubule-associated protein 1B;MAP1B heavy chain;MAP1 light chain LC1 | MAP1B   | 1389 | S | 1     | 265.4 | 0.78 | 0.87 | 0.93 | 0.94 | 0.98 | 1.72 | 0.67 | 0.62 | 0.68 |
| P46821 | Microtubule-associated protein 1B;MAP1B heavy chain;MAP1 light chain LC1 | MAP1B   | 1252 | S | 0.9   | 114.8 | 0.28 | 0.45 | 0.46 | 0.13 | 0.64 | 0.31 | 0.89 | 0.69 | 0.53 |
| P46821 | Microtubule-associated protein 1B;MAP1B heavy chain;MAP1 light chain LC1 | MAP1B   | 1254 | S | 0.677 | 114.8 | 0.44 | 0.47 | 0.77 | NaN  | 1.08 | 0.66 | 0.97 | 0.69 | 0.83 |
| P46821 | Microtubule-associated protein 1B;MAP1B heavy chain;MAP1 light chain LC1 | MAP1B   | 1256 | S | 0.963 | 114.8 | 0.28 | 1.05 | 1.09 | 1.11 | 1.08 | 0.95 | 0.96 | 1.02 | 0.87 |

|        |                                                                                |       |      |   |       |       |      |      |      |      |      |      |      |      |      |
|--------|--------------------------------------------------------------------------------|-------|------|---|-------|-------|------|------|------|------|------|------|------|------|------|
| P46821 | Microtubule-associated protein<br>1B;MAP1B heavy chain;MAP1<br>light chain LC1 | MAP1B | 1258 | S | 0.826 | 114.6 | 0.28 | 0.74 | 1.09 | 1.08 | NaN  | 0.75 | 0.96 | NaN  | 0.91 |
| P46821 | Microtubule-associated protein<br>1B;MAP1B heavy chain;MAP1<br>light chain LC1 | MAP1B | 1260 | S | 0.98  | 114.7 | 1.14 | NaN  | 0.50 | 0.44 | 1.08 | 0.92 | 1.09 | 1.12 | 0.75 |
| P46821 | Microtubule-associated protein<br>1B;MAP1B heavy chain;MAP1<br>light chain LC1 | MAP1B | 1265 | S | 1     | 217.8 | 1.03 | 1.03 | 1.05 | 0.83 | 0.85 | 0.88 | 1.05 | 1.02 | 0.27 |
| P46821 | Microtubule-associated protein<br>1B;MAP1B heavy chain;MAP1<br>light chain LC1 | MAP1B | 1154 | S | 0.993 | 204.9 | 0.62 | 0.62 | 0.58 | 0.66 | 0.86 | 0.85 | 0.43 | 0.48 | 0.54 |
| P46821 | Microtubule-associated protein<br>1B;MAP1B heavy chain;MAP1<br>light chain LC1 | MAP1B | 1208 | S | 0.981 | 243.8 | 0.44 | 0.46 | NaN  | 0.74 | 0.86 | 0.75 | NaN  | 0.56 | 0.50 |
| P46821 | Microtubule-associated protein<br>1B;MAP1B heavy chain;MAP1<br>light chain LC1 | MAP1B | 614  | S | 1     | 110   | 0.38 | 0.37 | 0.41 | 0.63 | 0.55 | 0.66 | 0.76 | 0.80 | 0.77 |
| P46821 | Microtubule-associated protein<br>1B;MAP1B heavy chain;MAP1<br>light chain LC1 | MAP1B | 1792 | S | 0.872 | 246.1 | 0.60 | 0.59 | 0.70 | NaN  | 0.52 | 0.54 | 1.02 | 1.02 | 0.94 |
| P46821 | Microtubule-associated protein<br>1B;MAP1B heavy chain;MAP1<br>light chain LC1 | MAP1B | 1793 | S | 0.989 | 239.2 | 0.60 | 0.58 | 0.64 | 0.50 | 0.50 | 0.49 | 0.93 | 1.01 | 1.02 |
| P46821 | Microtubule-associated protein<br>1B;MAP1B heavy chain;MAP1<br>light chain LC1 | MAP1B | 1797 | S | 1     | 246.1 | 1.24 | 1.23 | 1.57 | 1.34 | 1.26 | 1.43 | 1.11 | 0.84 | 1.05 |
| P46821 | Microtubule-associated protein<br>1B;MAP1B heavy chain;MAP1<br>light chain LC1 | MAP1B | 995  | S | 1     | 101.6 | 0.43 | 0.43 | NaN  | NaN  | NaN  | NaN  | 1.57 | NaN  | NaN  |
| P46821 | Microtubule-associated protein<br>1B;MAP1B heavy chain;MAP1<br>light chain LC1 | MAP1B | 1427 | S | 1     | 204.2 | 1.18 | 1.21 | 1.21 | 1.19 | 1.22 | 1.20 | 1.31 | 1.25 | 1.35 |
| P46821 | Microtubule-associated protein<br>1B;MAP1B heavy chain;MAP1<br>light chain LC1 | MAP1B | 891  | S | 0.995 | 90.34 | 1.04 | 0.61 | NaN  | NaN  | NaN  | NaN  | NaN  | NaN  | NaN  |
| P46821 | Microtubule-associated protein<br>1B;MAP1B heavy chain;MAP1<br>light chain LC1 | MAP1B | 2209 | S | 1     | 108.6 | 0.77 | 0.80 | 0.85 | 0.95 | 0.90 | 0.90 | 0.78 | 0.79 | NaN  |
| P46821 | Microtubule-associated protein<br>1B;MAP1B heavy chain;MAP1<br>light chain LC1 | MAP1B | 2211 | S | 1     | 108.6 | 0.77 | 0.80 | 0.85 | 0.95 | 0.90 | 0.90 | 0.78 | 0.79 | NaN  |
| P46821 | Microtubule-associated protein<br>1B;MAP1B heavy chain;MAP1<br>light chain LC1 | MAP1B | 561  | S | 0.985 | 63.68 | 0.32 | NaN  | NaN  | 0.24 | NaN  | NaN  | 0.26 | 0.25 | 0.65 |

|        |                                                                                |       |      |   |       |       |      |      |      |      |      |      |      |      |      |
|--------|--------------------------------------------------------------------------------|-------|------|---|-------|-------|------|------|------|------|------|------|------|------|------|
| P46821 | Microtubule-associated protein<br>1B;MAP1B heavy chain;MAP1<br>light chain LC1 | MAP1B | 1501 | S | 1     | 199.4 | 0.89 | 0.88 | 0.64 | 0.85 | 0.85 | 0.81 | 0.90 | 0.56 | 0.92 |
| P46821 | Microtubule-associated protein<br>1B;MAP1B heavy chain;MAP1<br>light chain LC1 | MAP1B | 1438 | S | 1     | 241.1 | 0.31 | 0.32 | 0.34 | 0.41 | 0.59 | 0.46 | 0.47 | 0.62 | 0.86 |
| P46821 | Microtubule-associated protein<br>1B;MAP1B heavy chain;MAP1<br>light chain LC1 | MAP1B | 1443 | S | 1     | 241.1 | 0.63 | 0.68 | 0.67 | 0.83 | 0.77 | 0.73 | 0.66 | 0.51 | 0.58 |
| P46821 | Microtubule-associated protein<br>1B;MAP1B heavy chain;MAP1<br>light chain LC1 | MAP1B | 937  | S | 0.784 | 221.1 | 0.71 | 0.55 | NaN  | 0.52 | NaN  | 0.66 | 0.89 | 0.82 | NaN  |
| P46821 | Microtubule-associated protein<br>1B;MAP1B heavy chain;MAP1<br>light chain LC1 | MAP1B | 1666 | S | 0.999 | 179.2 | NaN  | 0.27 | 0.54 | 0.69 | 0.62 | NaN  | 0.83 | NaN  | 0.74 |
| P46821 | Microtubule-associated protein<br>1B;MAP1B heavy chain;MAP1<br>light chain LC1 | MAP1B | 1782 | S | 1     | 120.4 | 1.42 | 1.65 | 1.17 | 0.81 | 1.14 | 1.15 | 1.55 | 1.49 | 1.69 |
| P46821 | Microtubule-associated protein<br>1B;MAP1B heavy chain;MAP1<br>light chain LC1 | MAP1B | 1785 | S | 1     | 146.8 | 0.37 | 0.34 | 0.36 | 0.36 | 0.36 | 0.38 | 0.41 | 0.37 | 0.36 |
| P46821 | Microtubule-associated protein<br>1B;MAP1B heavy chain;MAP1<br>light chain LC1 | MAP1B | 831  | S | 1     | 209.4 | 0.58 | 0.59 | 0.63 | 0.30 | 0.77 | 0.76 | 0.31 | 0.19 | 0.69 |
| P46821 | Microtubule-associated protein<br>1B;MAP1B heavy chain;MAP1<br>light chain LC1 | MAP1B | 832  | S | 1     | 209.4 | 0.21 | 0.28 | 0.63 | 0.32 | 0.32 | 0.76 | 0.24 | 0.66 | 0.69 |
| P46821 | Microtubule-associated protein<br>1B;MAP1B heavy chain;MAP1<br>light chain LC1 | MAP1B | 1915 | S | 0.999 | 205   | 0.82 | 0.67 | 0.70 | 0.91 | 0.90 | 0.80 | 0.97 | 0.93 | 0.91 |
| P46821 | Microtubule-associated protein<br>1B;MAP1B heavy chain;MAP1<br>light chain LC1 | MAP1B | 2256 | S | 0.989 | 84.62 | 0.76 | NaN  | 1.06 | NaN  | NaN  | NaN  | 0.83 | NaN  | 0.65 |
| P46821 | Microtubule-associated protein<br>1B;MAP1B heavy chain;MAP1<br>light chain LC1 | MAP1B | 1322 | S | 1     | 215.4 | 0.27 | 0.30 | 0.33 | 0.47 | 0.44 | 0.48 | 0.61 | 0.65 | 0.57 |
| P46821 | Microtubule-associated protein<br>1B;MAP1B heavy chain;MAP1<br>light chain LC1 | MAP1B | 1326 | S | 0.613 | 106.3 | 0.37 | 0.42 | NaN  | NaN  | NaN  | NaN  | 1.28 | NaN  | NaN  |
| P46821 | Microtubule-associated protein<br>1B;MAP1B heavy chain;MAP1<br>light chain LC1 | MAP1B | 1339 | S | 0.938 | 224   | 0.51 | 0.30 | 0.49 | 0.47 | 0.44 | 0.59 | 0.47 | 1.78 | 0.52 |
| P46821 | Microtubule-associated protein<br>1B;MAP1B heavy chain;MAP1<br>light chain LC1 | MAP1B | 1881 | S | 0.989 | 237.6 | 0.44 | NaN  | NaN  | NaN  | 0.64 | 0.62 | 0.58 | 0.55 | 0.53 |

|        |                                                                                |        |      |   |       |       |      |      |      |      |      |      |      |      |      |
|--------|--------------------------------------------------------------------------------|--------|------|---|-------|-------|------|------|------|------|------|------|------|------|------|
| P46821 | Microtubule-associated protein<br>1B;MAP1B heavy chain;MAP1<br>light chain LC1 | MAP1B  | 1396 | S | 1     | 375.4 | 1.07 | 0.81 | 1.03 | 0.99 | 0.96 | 0.91 | 0.80 | 1.10 | 0.89 |
| P46821 | Microtubule-associated protein<br>1B;MAP1B heavy chain;MAP1<br>light chain LC1 | MAP1B  | 1400 | S | 1     | 375.4 | 0.52 | 0.63 | 1.19 | 0.62 | 0.57 | 0.58 | 1.00 | 1.11 | 1.16 |
| P46821 | Microtubule-associated protein<br>1B;MAP1B heavy chain;MAP1<br>light chain LC1 | MAP1B  | 1779 | S | 1     | 154.5 | 0.44 | 0.46 | 0.43 | 0.45 | 0.46 | 0.44 | 0.64 | 0.64 | 0.62 |
| P46821 | Microtubule-associated protein<br>1B;MAP1B heavy chain;MAP1<br>light chain LC1 | MAP1B  | 1298 | S | 1     | 183.6 | 1.29 | 1.33 | 1.36 | 0.73 | 1.02 | 1.26 | 1.04 | 0.89 | 0.98 |
| P46821 | Microtubule-associated protein<br>1B;MAP1B heavy chain;MAP1<br>light chain LC1 | MAP1B  | 1312 | S | 1     | 205.6 | 0.67 | 0.65 | 0.55 | 0.70 | 0.62 | 0.69 | 0.78 | 0.93 | 1.57 |
| P46937 | Transcriptional coactivator<br>YAP1                                            | YAP1   | 61   | S | 1     | 222.8 | 0.71 | 0.75 | 0.87 | 0.84 | 0.75 | 0.86 | 2.26 | 1.67 | 0.66 |
| P46937 | Transcriptional coactivator<br>YAP1                                            | YAP1   | 289  | S | 1     | 116.5 | NaN  | NaN  | NaN  | NaN  | 2.01 | 2.28 | NaN  | NaN  | NaN  |
| P46937 | Transcriptional coactivator<br>YAP1                                            | YAP1   | 163  | S | 0.969 | 93.88 | NaN  | 1.03 | NaN  | NaN  | 1.11 | NaN  | NaN  | 1.05 | 1.04 |
| P46937 | Transcriptional coactivator<br>YAP1                                            | YAP1   | 164  | S | 0.966 | 114.1 | 0.99 | 0.97 | 1.07 | 0.97 | 0.96 | 1.10 | 1.08 | 0.88 | 1.17 |
| P46937 | Transcriptional coactivator<br>YAP1                                            | YAP1   | 367  | S | 0.982 | 140.9 | 1.05 | NaN  | NaN  | 1.61 | 1.62 | NaN  | NaN  | NaN  | 1.04 |
| P48634 | Protein PRRC2A                                                                 | PRRC2A | 380  | S | 0.99  | 52.07 | 0.70 | 0.68 | NaN  | NaN  | 0.97 | NaN  | NaN  | NaN  | NaN  |
| P48634 | Protein PRRC2A                                                                 | PRRC2A | 1219 | S | 1     | 86.29 | 2.23 | 2.23 | 2.13 | 2.15 | 2.24 | 2.09 | 1.31 | 1.28 | NaN  |
| P48634 | Protein PRRC2A                                                                 | PRRC2A | 342  | S | 1     | 106.1 | 1.77 | NaN  | 1.16 | NaN  | NaN  | NaN  | 1.04 | 0.98 | 1.11 |
| P48634 | Protein PRRC2A                                                                 | PRRC2A | 350  | S | 1     | 106.1 | 1.77 | NaN  | 1.16 | NaN  | NaN  | NaN  | 1.04 | 0.98 | 1.11 |
| P48651 | Phosphatidylserine synthase 1                                                  | PTDSS1 | 442  | S | 1     | 77.19 | 0.74 | 0.63 | NaN  | 0.94 | 0.78 | 0.88 | 0.96 | NaN  | 0.76 |
| P48681 | Nestin                                                                         | NES    | 680  | S | 1     | 85.75 | 1.18 | 1.05 | NaN  | NaN  | NaN  | NaN  | 1.03 | 0.93 | 1.04 |
| P48681 | Nestin                                                                         | NES    | 471  | S | 0.995 | 176.5 | 0.84 | 0.75 | 1.16 | 0.77 | NaN  | 1.16 | 1.53 | NaN  | NaN  |
| P48681 | Nestin                                                                         | NES    | 768  | S | 1     | 50.87 | NaN  | NaN  | NaN  | NaN  | NaN  | NaN  | 1.35 | 1.27 | NaN  |
| P48960 | CD97 antigen;CD97 antigen<br>subunit alpha;CD97 antigen<br>subunit beta        | CD97   | 831  | S | 0.86  | 63.69 | NaN  | NaN  | 1.65 | 1.88 | NaN  | 1.81 | 3.86 | 3.63 | NaN  |
| P49321 | Nuclear autoantigenic sperm<br>protein                                         | NASP   | 480  | S | 1     | 248.2 | NaN  | 0.33 | 0.31 | 0.56 | 0.62 | 0.57 | 0.36 | 0.38 | NaN  |
| P49321 | Nuclear autoantigenic sperm<br>protein                                         | NASP   | 726  | S | 1     | 85.36 | 0.78 | 0.83 | 0.80 | 1.02 | NaN  | 0.95 | 0.74 | NaN  | 0.73 |
| P49321 | Nuclear autoantigenic sperm<br>protein                                         | NASP   | 421  | S | 0.999 | 67.93 | 2.19 | 2.34 | 2.98 | 1.61 | 1.23 | 3.42 | 1.13 | 1.23 | 3.20 |
| P49321 | Nuclear autoantigenic sperm<br>protein                                         | NASP   | 451  | S | 0.528 | 41.32 | NaN  | NaN  | NaN  | 1.33 | 1.47 | NaN  | NaN  | 1.03 | 0.96 |
| P49454 | Centromere protein F                                                           | CENPF  | 3079 | S | 0.832 | 70.99 | 0.54 | 0.63 | NaN  | NaN  | NaN  | 1.51 | NaN  | NaN  | 0.52 |
| P49585 | Choline-phosphate<br>cytidyltransferase A                                      | PCYT1A | 362  | S | 1     | 116.8 | 2.16 | 2.24 | 2.32 | 2.34 | 2.04 | 2.06 | 1.30 | 1.26 | 1.29 |

|        |                                                                                                                                                                                                                                                                                                                                                                                                                                                                                                                                        |        |      |   |       |       |      |      |      |      |      |      |      |      |      |
|--------|----------------------------------------------------------------------------------------------------------------------------------------------------------------------------------------------------------------------------------------------------------------------------------------------------------------------------------------------------------------------------------------------------------------------------------------------------------------------------------------------------------------------------------------|--------|------|---|-------|-------|------|------|------|------|------|------|------|------|------|
| P49585 | Choline-phosphate<br>cytidyltransferase A                                                                                                                                                                                                                                                                                                                                                                                                                                                                                              | PCYT1A | 329  | S | 1     | 71.15 | NaN  | NaN  | 0.82 | 0.93 | NaN  | 0.87 | 0.90 | 0.80 | 0.87 |
| P49585 | Choline-phosphate<br>cytidyltransferase A                                                                                                                                                                                                                                                                                                                                                                                                                                                                                              | PCYT1A | 331  | S | 0.996 | 71.15 | NaN  | NaN  | 0.82 | 0.93 | 1.09 | 0.87 | 0.90 | 0.80 | 0.87 |
| P49585 | Choline-phosphate<br>cytidyltransferase A                                                                                                                                                                                                                                                                                                                                                                                                                                                                                              | PCYT1A | 315  | S | 1     | 120.8 | 0.72 | 0.59 | 0.70 | 0.89 | 1.00 | 0.75 | 0.57 | 0.54 | NaN  |
| P49585 | Choline-phosphate<br>cytidyltransferase A                                                                                                                                                                                                                                                                                                                                                                                                                                                                                              | PCYT1A | 319  | S | 0.999 | 120.8 | 0.72 | 0.59 | 0.70 | 0.89 | 1.00 | 0.75 | 0.57 | 0.52 | NaN  |
| P49585 | Choline-phosphate<br>cytidyltransferase A                                                                                                                                                                                                                                                                                                                                                                                                                                                                                              | PCYT1A | 321  | S | 0.569 | 63.46 | NaN  | 0.47 | NaN  | 0.93 | 1.04 | NaN  | 0.55 | 0.54 | NaN  |
| P49585 | Choline-phosphate<br>cytidyltransferase A                                                                                                                                                                                                                                                                                                                                                                                                                                                                                              | PCYT1A | 322  | S | 0.884 | 118   | 0.72 | 0.47 | NaN  | 0.93 | 1.04 | NaN  | 0.55 | 0.52 | NaN  |
| P49585 | Choline-phosphate<br>cytidyltransferase A                                                                                                                                                                                                                                                                                                                                                                                                                                                                                              | PCYT1A | 323  | S | 0.872 | 120.8 | NaN  | 0.53 | 0.70 | 0.88 | 1.00 | 0.75 | 0.57 | 0.52 | NaN  |
| P49736 | DNA replication licensing<br>factor MCM2                                                                                                                                                                                                                                                                                                                                                                                                                                                                                               | MCM2   | 139  | S | 1     | 343.7 | 0.80 | 0.81 | 0.76 | 0.85 | 0.88 | 0.84 | 0.85 | 0.82 | 0.84 |
| P49736 | DNA replication licensing<br>factor MCM2                                                                                                                                                                                                                                                                                                                                                                                                                                                                                               | MCM2   | 26   | S | 0.588 | 229.8 | NaN  | 0.86 | NaN  | 0.96 | 1.00 | NaN  | 0.80 | NaN  | 0.69 |
| P49736 | DNA replication licensing<br>factor MCM2                                                                                                                                                                                                                                                                                                                                                                                                                                                                                               | MCM2   | 27   | S | 0.977 | 229.8 | 0.85 | NaN  | 0.90 | 0.96 | 0.95 | 0.99 | NaN  | NaN  | NaN  |
| P49736 | DNA replication licensing<br>factor MCM2                                                                                                                                                                                                                                                                                                                                                                                                                                                                                               | MCM2   | 41   | S | 0.957 | 150.4 | 0.70 | 0.69 | NaN  | NaN  | NaN  | NaN  | 0.66 | NaN  | NaN  |
| P49756 | RNA-binding protein 25                                                                                                                                                                                                                                                                                                                                                                                                                                                                                                                 | RBM25  | 583  | S | 1     | 181.8 | 1.07 | 0.96 | 1.53 | 1.48 | 1.43 | 1.45 | 1.66 | 1.52 | 0.93 |
| P49790 | Nuclear pore complex protein<br>Nup153                                                                                                                                                                                                                                                                                                                                                                                                                                                                                                 | NUP153 | 687  | S | 1     | 112.2 | NaN  | NaN  | 1.16 | 1.55 | 1.59 | 1.32 | 0.57 | NaN  | 0.56 |
| P49792 | E3 SUMO-protein ligase<br>RanBP2;RanBP2-like and<br>GRIP domain-containing<br>protein 4;RanBP2-like and<br>GRIP domain-containing<br>protein 3;RANBP2-like and<br>GRIP domain-containing<br>protein 1;RANBP2-like and<br>GRIP domain-containing<br>protein 2;RANBP2-like and<br>GRIP domain-containing<br>protein 5/6;RANBP2-like and<br>GRIP domain-containing<br>protein 4;RanBP2-like and<br>GRIP domain-containing<br>protein 3;RANBP2-like and<br>GRIP domain-containing<br>protein 5/6;RANBP2-like and<br>GRIP domain-containing | RANBP2 | 2510 | S | 1     | 61.18 | NaN  | 0.46 | 0.54 | 0.84 | 0.88 | 1.10 | 0.84 | 0.82 | 1.19 |
| P49792 | E3 SUMO-protein ligase<br>RanBP2;RanBP2-like and<br>GRIP domain-containing<br>protein 4;RanBP2-like and<br>GRIP domain-containing<br>protein 3;RANBP2-like and<br>GRIP domain-containing<br>protein 5/6;RANBP2-like and<br>GRIP domain-containing                                                                                                                                                                                                                                                                                      | RANBP2 | 2246 | S | 0.989 | 152.2 | 0.98 | 1.32 | 1.62 | 1.27 | NaN  | 1.25 | 1.31 | 1.27 | 1.04 |



|        |                                                                                                                                                                                                                                                                             |         |      |   |       |       |      |      |      |       |      |       |      |      |      |
|--------|-----------------------------------------------------------------------------------------------------------------------------------------------------------------------------------------------------------------------------------------------------------------------------|---------|------|---|-------|-------|------|------|------|-------|------|-------|------|------|------|
| P51610 | Host cell factor 1;HCF N-terminal chain 1;HCF N-terminal chain 2;HCF N-terminal chain 3;HCF N-terminal chain 4;HCF N-terminal chain 5;HCF N-terminal chain 6;HCF C-terminal chain 1;HCF C-terminal chain 2;HCF C-terminal chain 3;HCF C-Ribosomal protein S6 kinase alpha-3 | HCFC1   | 1507 | S | 1     | 89.68 | 1.73 | 2.03 | 2.15 | NaN   | NaN  | 2.07  | 1.60 | 1.35 | NaN  |
| P51812 | Ribosomal protein S6 kinase alpha-3                                                                                                                                                                                                                                         | RPS6KA3 | 715  | S | 1     | 57.43 | NaN  | NaN  | NaN  | 1.78  | NaN  | NaN   | 1.24 | 1.08 | 1.18 |
| P51812 | Ribosomal protein S6 kinase alpha-3                                                                                                                                                                                                                                         | RPS6KA3 | 369  | S | 0.987 | 51    | NaN  | NaN  | NaN  | NaN   | NaN  | 1.24  | 0.80 | 0.83 | 0.87 |
| P51858 | Hepatoma-derived growth factor                                                                                                                                                                                                                                              | HDGF    | 165  | S | 1     | 191.9 | 0.98 | 0.94 | 0.98 | 0.99  | 0.99 | 1.00  | 1.09 | 1.10 | 1.11 |
| P51858 | Hepatoma-derived growth factor                                                                                                                                                                                                                                              | HDGF    | 132  | S | 1     | 219   | 1.03 | 1.00 | 0.66 | 0.94  | 0.92 | 0.75  | 1.16 | 1.14 | 0.98 |
| P51858 | Hepatoma-derived growth factor                                                                                                                                                                                                                                              | HDGF    | 133  | S | 1     | 219   | 0.84 | 0.66 | 0.72 | 0.62  | 0.73 | 0.80  | 0.73 | 0.65 | 0.83 |
| P51991 | Heterogeneous nuclear ribonucleoprotein A3                                                                                                                                                                                                                                  | HNRNPA3 | 358  | S | 1     | 277.5 | 1.01 | 1.03 | 0.94 | 0.91  | 0.99 | 0.96  | 1.19 | 1.10 | 0.97 |
| P52756 | RNA-binding protein 5                                                                                                                                                                                                                                                       | RBM5    | 59   | S | 0.852 | 40.62 | 1.02 | 0.86 | NaN  | NaN   | NaN  | NaN   | NaN  | NaN  | NaN  |
| P52756 | RNA-binding protein 5                                                                                                                                                                                                                                                       | RBM5    | 624  | S | 1     | 176.9 | 1.33 | 1.12 | NaN  | NaN   | 1.11 | 0.90  | 1.31 | 1.42 | NaN  |
| P52926 | High mobility group protein HMGI-C                                                                                                                                                                                                                                          | HMGA2   | 44   | S | 1     | 108.4 | 0.37 | NaN  | 0.61 | 1.11  | 1.03 | 0.48  | NaN  | 0.78 | 0.79 |
| P53396 | ATP-citrate synthase                                                                                                                                                                                                                                                        | ACLY    | 481  | S | 1     | 92.77 | 1.65 | 1.59 | 1.68 | 2.08  | 2.24 | 2.07  | 0.99 | 1.02 | 0.91 |
| P54198 | Protein HIRA                                                                                                                                                                                                                                                                | HIRA    | 610  | S | 1     | 57.41 | 0.66 | NaN  | NaN  | NaN   | 0.60 | NaN   | NaN  | 0.96 | 0.86 |
| P54198 | Protein HIRA                                                                                                                                                                                                                                                                | HIRA    | 611  | S | 1     | 57.41 | 0.66 | NaN  | NaN  | NaN   | 0.60 | NaN   | NaN  | 0.96 | 0.86 |
| P54198 | Protein HIRA                                                                                                                                                                                                                                                                | HIRA    | 612  | S | 1     | 57.41 | 0.66 | NaN  | NaN  | NaN   | 0.60 | NaN   | NaN  | 0.96 | 0.86 |
| P54198 | Protein HIRA                                                                                                                                                                                                                                                                | HIRA    | 614  | S | 1     | 57.41 | 0.66 | NaN  | NaN  | NaN   | 0.60 | NaN   | NaN  | 0.96 | 0.86 |
| P54259 | Atrophin-1                                                                                                                                                                                                                                                                  | ATN1    | 661  | S | 0.926 | 77.63 | NaN  | 1.05 | 1.07 | 1.02  | NaN  | 0.96  | 0.95 | 0.81 | 0.94 |
| P54259 | Atrophin-1                                                                                                                                                                                                                                                                  | ATN1    | 101  | S | 0.958 | 62.65 | NaN  | 0.58 | 0.80 | 0.60  | 0.57 | NaN   | NaN  | NaN  | NaN  |
| P55081 | Microfibrillar-associated protein 1                                                                                                                                                                                                                                         | MFAP1   | 116  | S | 1     | 155.9 | 1.10 | 1.00 | 1.11 | 1.08  | 1.04 | 1.11  | 1.05 | 0.96 | 1.16 |
| P55081 | Microfibrillar-associated protein 1                                                                                                                                                                                                                                         | MFAP1   | 118  | S | 1     | 155.9 | 1.27 | 1.29 | 1.27 | 1.15  | 1.02 | 1.05  | 1.29 | 0.99 | 1.24 |
| P55081 | Microfibrillar-associated protein 1                                                                                                                                                                                                                                         | MFAP1   | 52   | S | 1     | 134.1 | 0.62 | 0.66 | 0.66 | 0.84  | 0.80 | 0.72  | 0.52 | 0.50 | 0.59 |
| P55081 | Microfibrillar-associated protein 1                                                                                                                                                                                                                                         | MFAP1   | 53   | S | 1     | 134.1 | 0.62 | 0.66 | 0.66 | 0.84  | 0.80 | 0.72  | 0.52 | 0.50 | 0.59 |
| P55327 | Tumor protein D52                                                                                                                                                                                                                                                           | TPD52   | 171  | S | 0.955 | 66.39 | 1.64 | NaN  | NaN  | 2.65  | 2.90 | 3.05  | 0.78 | 0.87 | 1.20 |
| P55327 | Tumor protein D52                                                                                                                                                                                                                                                           | TPD52   | 176  | S | 1     | 76.07 | 0.66 | 0.59 | 0.83 | 0.49  | 0.56 | 0.63  | 3.08 | 2.88 | 3.51 |
| P56524 | Histone deacetylase 4                                                                                                                                                                                                                                                       | HDAC4   | 565  | S | 1     | 140   | 0.90 | 1.02 | 0.89 | 0.73  | 0.66 | 0.93  | 0.98 | 1.17 | 1.06 |
| P60174 | Triosephosphate isomerase                                                                                                                                                                                                                                                   | TPI1    | 58   | S | 1     | 257.5 | 1.00 | 1.09 | 1.00 | 1.18  | 1.16 | 1.11  | 1.06 | 0.96 | 1.13 |
| P61006 | Ras-related protein Rab-8A                                                                                                                                                                                                                                                  | RAB8A   | 181  | S | 1     | 158.7 | NaN  | NaN  | 8.22 | 20.18 | NaN  | 11.42 | 1.97 | NaN  | NaN  |



|        |                                                                        |        |         |   |       |       |      |      |      |      |      |      |      |      |      |
|--------|------------------------------------------------------------------------|--------|---------|---|-------|-------|------|------|------|------|------|------|------|------|------|
| P61978 | Heterogeneous nuclear ribonucleoprotein K                              | HNRNPK | 284     | S | 1     | 113.6 | 1.22 | 1.32 | 1.26 | 1.24 | NaN  | 1.18 | 1.19 | 1.18 | 1.31 |
| P61978 | Heterogeneous nuclear ribonucleoprotein K                              | HNRNPK | 379     | S | 0.952 | 92.43 | 1.93 | NaN  | NaN  | NaN  | 2.54 | 2.87 | 1.62 | NaN  | NaN  |
| P61978 | Heterogeneous nuclear ribonucleoprotein K                              | HNRNPK | 214     | S | 0.979 | 106.3 | 1.98 | 2.14 | 2.66 | NaN  | NaN  | NaN  | 0.90 | 0.86 | 0.85 |
| P61978 | Heterogeneous nuclear ribonucleoprotein K                              | HNRNPK | 216     | S | 0.985 | 139   | 1.90 | 2.20 | 2.32 | 3.68 | 3.59 | NaN  | NaN  | NaN  | 0.95 |
| P61978 | Heterogeneous nuclear ribonucleoprotein K                              | HNRNPK | 116     | S | 1     | 252.8 | 1.05 | 1.02 | 0.95 | 0.98 | 1.09 | 1.02 | 0.49 | 0.48 | 0.45 |
| P62070 | Ras-related protein R-Ras2                                             | RRAS2  | 186     | S | 1     | 181.7 | 1.39 | 1.42 | 1.34 | 1.48 | 1.49 | 1.49 | 1.01 | 0.94 | 1.03 |
| P62258 | 14-3-3 protein epsilon                                                 | YWHAE  | 210     | S | 0.989 | 125.5 | 1.01 | 1.06 | 1.18 | 0.99 | 1.01 | 1.02 | 1.03 | 0.98 | 0.99 |
| P62328 | Thymosin beta-4;Hematopoietic system                                   | TMSB4X | 44      | S | 1     | 145.5 | 1.03 | 1.27 | 1.40 | 1.62 | 1.66 | 1.80 | 1.02 | 1.01 | NaN  |
| P62995 | Transformer-2 protein homolog beta                                     | TRA2B  | 95      | S | 0.999 | 53.74 | 0.77 | 0.80 | NaN  | NaN  | NaN  | NaN  | NaN  | NaN  | NaN  |
| P62995 | Transformer-2 protein homolog beta                                     | TRA2B  | 97      | S | 0.994 | 53.74 | 0.77 | 0.80 | NaN  | NaN  | NaN  | NaN  | NaN  | NaN  | NaN  |
| P62995 | Transformer-2 protein homolog beta                                     | TRA2B  | 99      | S | 0.757 | 53.74 | 0.77 | 0.80 | NaN  | NaN  | NaN  | NaN  | NaN  | NaN  | NaN  |
| Q13595 | Transformer-2 protein homolog beta;Transformer-2 protein homolog alpha | TRA2B  | 264;260 | S | 1     | 105.8 | 0.63 | 0.66 | 0.56 | 0.64 | 0.60 | 0.90 | 1.14 | 1.14 | 0.61 |
| Q13595 | Transformer-2 protein homolog beta;Transformer-2 protein homolog alpha | TRA2B  | 266;262 | S | 0.999 | 103.1 | 0.92 | 0.75 | 1.00 | 0.91 | 0.95 | 0.90 | 1.14 | 1.10 | 1.19 |
| Q13595 | Transformer-2 protein homolog beta;Transformer-2 protein homolog alpha | TRA2B  | 270;266 | S | 0.894 | 105.8 | 0.93 | NaN  | NaN  | NaN  | NaN  | NaN  | 1.09 | NaN  | 1.14 |
| Q5VU10 | Ribonuclease P protein subunit p30                                     | RPP30  | 195     | S | 1     | 59.56 | 0.83 | 0.78 | NaN  | 1.17 | 1.06 | NaN  | NaN  | NaN  | NaN  |
| P78527 | DNA-dependent protein kinase catalytic subunit                         | PRKDC  | 2612    | S | 0.992 | 159.8 | 0.91 | 0.98 | 0.93 | 1.27 | 1.22 | 1.13 | 0.65 | 0.73 | NaN  |
| P78536 | Disintegrin and metalloproteinase domain-containing protein 17         | ADAM17 | 791     | S | 1     | 137   | 2.04 | 2.33 | 2.60 | 2.44 | 2.30 | 1.96 | 1.66 | 1.77 | 1.86 |
| P80723 | Brain acid soluble protein 1                                           | BASP1  | 164     | S | 0.99  | 60.62 | NaN  | 0.91 | NaN  | 0.80 | 0.85 | NaN  | NaN  | 1.38 | NaN  |
| P80723 | Brain acid soluble protein 1                                           | BASP1  | 170     | S | 0.888 | 51.62 | 1.04 | NaN  | 1.11 | NaN  | NaN  | 0.92 | NaN  | NaN  | NaN  |
| P84103 | Serine/arginine-rich splicing factor 3                                 | SRSF3  | 138     | S | 1     | 67.19 | 1.31 | 1.36 | 1.27 | 1.17 | 1.16 | 1.10 | 1.51 | 1.48 | 1.43 |
| P84103 | Serine/arginine-rich splicing factor 3                                 | SRSF3  | 140     | S | 1     | 67.19 | 1.31 | 1.36 | 1.27 | 1.17 | 1.16 | 1.10 | 1.51 | 1.48 | 1.43 |
| P85037 | Forkhead box protein K1                                                | FOXK1  | 299     | S | 0.695 | 197   | NaN  | NaN  | NaN  | NaN  | NaN  | NaN  | 0.78 | 0.61 | NaN  |
| P85037 | Forkhead box protein K1                                                | FOXK1  | 213     | S | 0.999 | 75.18 | NaN  | 0.93 | NaN  | 0.74 | NaN  | 0.88 | 0.73 | 0.88 | NaN  |
| P85037 | Forkhead box protein K1                                                | FOXK1  | 445     | S | 1     | 158.9 | 0.96 | 0.99 | 1.00 | 0.92 | 0.91 | 0.89 | 0.97 | 0.98 | 0.95 |
| P85037 | Forkhead box protein K1                                                | FOXK1  | 420     | S | 0.987 | 142.3 | 0.79 | 0.74 | 0.74 | 0.76 | 0.81 | 0.72 | 0.68 | 0.63 | 0.73 |
| P85037 | Forkhead box protein K1                                                | FOXK1  | 243     | S | 0.976 | 103.9 | 0.83 | 0.77 | 0.67 | 1.33 | 0.97 | 0.92 | NaN  | 1.19 | NaN  |

|        |                                                                             |              |      |   |       |       |      |      |      |      |      |      |      |      |      |
|--------|-----------------------------------------------------------------------------|--------------|------|---|-------|-------|------|------|------|------|------|------|------|------|------|
| P85037 | Forkhead box protein K1                                                     | FOXK1        | 253  | S | 0.684 | 62.61 | NaN  | NaN  | NaN  | NaN  | 0.97 | 0.79 | NaN  | 1.19 | NaN  |
| P85037 | Forkhead box protein K1                                                     | FOXK1        | 257  | S | 0.972 | 90.32 | 0.83 | 0.77 | 0.67 | NaN  | NaN  | NaN  | 0.97 | 0.67 | NaN  |
| P98082 | Disabled homolog 2                                                          | DAB2         | 401  | S | 1     | 62.69 | 0.87 | 1.00 | NaN  | 0.86 | 1.15 | NaN  | NaN  | NaN  | NaN  |
| P98175 | RNA-binding protein 10                                                      | RBM10        | 736  | S | 1     | 120.9 | 0.99 | 0.95 | 1.04 | 0.88 | 0.94 | 0.86 | 1.09 | 1.17 | 1.04 |
| P98175 | RNA-binding protein 10                                                      | RBM10        | 738  | S | 1     | 136.6 | 0.99 | 0.95 | 1.04 | 0.88 | 0.94 | 0.86 | 1.09 | 1.17 | 1.04 |
| P98175 | RNA-binding protein 10                                                      | RBM10        | 723  | S | 1     | 121.5 | 1.21 | 1.30 | 1.22 | 1.14 | 1.13 | 1.11 | 1.15 | 1.15 | 1.18 |
| Q00587 | Cdc42 effector protein 1                                                    | CDC42EP<br>1 | 350  | S | 1     | 92.3  | NaN  | 0.93 | 0.96 | NaN  | 0.78 | 0.84 | 1.36 | 1.28 | NaN  |
| Q00587 | Cdc42 effector protein 1                                                    | CDC42EP<br>1 | 101  | S | 0.985 | 41.67 | NaN  | 1.21 | NaN  | 1.51 | 1.64 | NaN  | NaN  | 0.61 | NaN  |
| Q00587 | Cdc42 effector protein 1                                                    | CDC42EP<br>1 | 303  | S | 0.998 | 81.19 | 1.32 | 1.25 | 1.26 | NaN  | NaN  | 0.94 | NaN  | 1.73 | 1.83 |
| Q01130 | Serine/arginine-rich splicing factor 2                                      | SRSF2        | 206  | S | 1     | 60.74 | NaN  | 0.54 | 1.08 | 0.76 | 0.57 | NaN  | 1.14 | 0.97 | NaN  |
| Q01130 | Serine/arginine-rich splicing factor 2                                      | SRSF2        | 208  | S | 1     | 60.74 | NaN  | 0.54 | 1.08 | 0.76 | 0.57 | NaN  | 1.14 | 0.97 | NaN  |
| Q01130 | Serine/arginine-rich splicing factor 2                                      | SRSF2        | 212  | S | 1     | 58.69 | NaN  | 0.54 | 1.08 | 1.06 | NaN  | NaN  | 1.14 | 1.27 | NaN  |
| Q01130 | Serine/arginine-rich splicing factor 2                                      | SRSF2        | 220  | S | 0.545 | 60.74 | NaN  | NaN  | 1.08 | 0.76 | 0.57 | NaN  | 1.14 | 0.97 | NaN  |
| Q01130 | Serine/arginine-rich splicing factor 2                                      | SRSF2        | 189  | S | 1     | 73.44 | 1.07 | 1.06 | 1.01 | 0.95 | 0.97 | 0.97 | 1.15 | 1.12 | 1.16 |
| Q01130 | Serine/arginine-rich splicing factor 2                                      | SRSF2        | 191  | S | 1     | 73.44 | 1.07 | 1.06 | 1.01 | 0.30 | 0.97 | 0.97 | 0.29 | 0.28 | 1.16 |
| Q01130 | Serine/arginine-rich splicing factor 2                                      | SRSF2        | 187  | S | 1     | 60.55 | 0.97 | 0.98 | NaN  | NaN  | 0.88 | 0.90 | 1.07 | 1.13 | 1.04 |
| Q01130 | Serine/arginine-rich splicing factor 2                                      | SRSF2        | 26   | S | 0.999 | 157   | 1.00 | 0.97 | 0.98 | 1.22 | 1.15 | 1.21 | 1.05 | 0.85 | 1.13 |
| Q01167 | Forkhead box protein K2                                                     | FOXK2        | 398  | S | 1     | 182.1 | 0.59 | 0.42 | NaN  | NaN  | NaN  | NaN  | 0.87 | 0.73 | NaN  |
| Q01167 | Forkhead box protein K2                                                     | FOXK2        | 170  | S | 0.732 | 47.31 | NaN  | NaN  | 0.57 | NaN  | 1.01 | 0.98 | 0.68 | 0.68 | NaN  |
| Q01518 | Adenylyl cyclase-associated protein 1;Adenylyl cyclase-associated protein 1 | CAP1         | 34   | S | 0.999 | 157.8 | 3.02 | 2.54 | 2.96 | 4.15 | 4.26 | 4.46 | 0.96 | 0.87 | 1.00 |
| Q01518 | Adenylyl cyclase-associated protein 1                                       | CAP1         | 308  | S | 0.882 | 78.35 | NaN  | NaN  | 0.35 | 0.36 | 0.36 | 0.32 | 0.20 | 0.24 | 0.21 |
| Q01804 | OTU domain-containing protein 4                                             | OTUD4        | 1006 | S | 0.999 | 88.49 | 1.65 | 1.61 | NaN  | NaN  | NaN  | NaN  | 0.82 | NaN  | NaN  |
| Q01804 | OTU domain-containing protein 4                                             | OTUD4        | 1023 | S | 0.999 | 117.2 | 1.08 | 1.06 | NaN  | 0.75 | NaN  | NaN  | NaN  | 1.01 | NaN  |
| Q01804 | OTU domain-containing protein 4                                             | OTUD4        | 1024 | S | 0.999 | 117.2 | 1.08 | 1.06 | NaN  | 0.75 | NaN  | NaN  | NaN  | 1.01 | NaN  |
| Q02040 | A-kinase anchor protein 17A                                                 | AKAP17A      | 537  | S | 1     | 77.59 | NaN  | 1.81 | 0.80 | 0.85 | 0.88 | 0.96 | 0.93 | 0.92 | 0.95 |
| Q02880 | DNA topoisomerase 2-beta                                                    | TOP2B        | 1336 | S | 0.998 | 52.35 | 0.63 | 0.81 | 0.78 | 0.67 | NaN  | NaN  | NaN  | 1.50 | 0.89 |
| Q02880 | DNA topoisomerase 2-beta                                                    | TOP2B        | 1340 | S | 0.999 | 52.35 | 0.63 | 0.81 | 0.78 | 0.67 | NaN  | NaN  | NaN  | 1.50 | 0.89 |
| Q02880 | DNA topoisomerase 2-beta                                                    | TOP2B        | 1342 | S | 0.996 | 52.35 | 0.63 | 0.81 | 0.78 | 0.67 | NaN  | NaN  | NaN  | 1.50 | 0.89 |
| Q02880 | DNA topoisomerase 2-beta                                                    | TOP2B        | 1344 | S | 0.995 | 52.35 | 0.63 | 0.81 | 0.78 | 0.67 | NaN  | NaN  | NaN  | 1.50 | 0.89 |
| Q02880 | DNA topoisomerase 2-beta                                                    | TOP2B        | 1581 | S | 0.995 | 110.3 | 0.77 | 0.78 | 0.76 | 0.80 | 0.80 | 0.71 | 1.00 | 1.04 | 1.03 |

|        |                                                                                                        |         |         |   |       |       |       |       |      |      |      |      |      |      |      |
|--------|--------------------------------------------------------------------------------------------------------|---------|---------|---|-------|-------|-------|-------|------|------|------|------|------|------|------|
| Q02880 | DNA topoisomerase 2-beta                                                                               | TOP2B   | 1522    | S | 1     | 173   | 0.72  | 0.37  | 0.81 | 0.93 | 0.69 | 0.88 | 0.99 | 1.05 | 0.87 |
| Q02880 | DNA topoisomerase 2-beta                                                                               | TOP2B   | 1524    | S | 0.998 | 173   | 0.72  | 0.69  | 0.81 | 0.93 | 0.58 | 0.88 | 0.99 | 1.05 | 0.87 |
| Q02880 | DNA topoisomerase 2-beta                                                                               | TOP2B   | 1526    | S | 0.958 | 89.14 | NaN   | NaN   | NaN  | NaN  | 0.84 | 0.94 | NaN  | 0.88 | NaN  |
| Q02880 | DNA topoisomerase 2-beta                                                                               | TOP2B   | 1400    | S | 0.952 | 93.86 | NaN   | 0.57  | NaN  | NaN  | 0.88 | 0.67 | NaN  | 0.37 | NaN  |
| Q02880 | DNA topoisomerase 2-beta                                                                               | TOP2B   | 1413    | S | 0.995 | 93.86 | NaN   | 0.50  | NaN  | NaN  | 0.88 | 0.67 | NaN  | 0.37 | NaN  |
| Q02952 | A-kinase anchor protein 12                                                                             | AKAP12  | 1331    | S | 0.999 | 55.31 | 1.66  | 1.87  | NaN  | NaN  | 0.79 | 0.92 | 2.46 | NaN  | NaN  |
| Q03111 | Protein ENL                                                                                            | MLLT1   | 475     | S | 0.993 | 47.54 | NaN   | NaN   | NaN  | 1.03 | 1.16 | 0.68 | NaN  | NaN  | 0.74 |
| Q03111 | Protein ENL                                                                                            | MLLT1   | 315     | S | 0.5   | 84.82 | NaN   | NaN   | NaN  | 0.93 | NaN  | NaN  | 0.97 | NaN  | 0.85 |
| Q03164 | Histone-lysine N-methyltransferase 2A;MLL cleavage product N320;MLL cleavage product C180              | KMT2A   | 1837    | S | 0.973 | 93.15 | 0.59  | 0.58  | 0.80 | 0.64 | NaN  | NaN  | NaN  | NaN  | 0.74 |
| Q03164 | Histone-lysine N-methyltransferase 2A;MLL cleavage product N320;MLL cleavage product C180              | KMT2A   | 3527    | S | 0.949 | 50.4  | 0.69  | 0.83  | NaN  | NaN  | NaN  | NaN  | NaN  | NaN  | NaN  |
| Q03164 | Histone-lysine N-methyltransferase 2A;MLL cleavage product N320;MLL cleavage product C180              | KMT2A   | 2098    | S | 0.98  | 83.72 | NaN   | 0.54  | 0.51 | NaN  | 0.72 | NaN  | 0.51 | NaN  | NaN  |
| Q03252 | Lamin-B2                                                                                               | LMNB2   | 37      | S | 0.999 | 165   | 3.48  | 3.56  | 3.37 | NaN  | NaN  | 5.36 | 0.88 | NaN  | 0.98 |
| Q04721 | Neurogenic locus notch homolog protein 2;Notch 2 extracellular truncation;Notch 2 intracellular domain | NOTCH2  | 1845    | S | 0.992 | 206.4 | 1.01  | 1.40  | NaN  | NaN  | NaN  | 1.14 | 1.05 | NaN  | 0.87 |
| Q05209 | Tyrosine-protein phosphatase non-receptor type 12                                                      | PTPN12  | 603     | S | 1     | 121.6 | 1.13  | 1.07  | 1.25 | 0.81 | 0.90 | 0.86 | 1.09 | 0.89 | 1.10 |
| Q05209 | Tyrosine-protein phosphatase non-receptor type 12                                                      | PTPN12  | 606     | S | 0.999 | 121.6 | 1.13  | 1.07  | 1.11 | 0.49 | 0.90 | 0.86 | 0.76 | 1.31 | 1.00 |
| Q5T757 | Serine/arginine-rich splicing factor 11                                                                | SRSF11  | 374     | S | 1     | 237.9 | 1.09  | 1.15  | 1.08 | 1.05 | 1.15 | 8.01 | 1.56 | 1.31 | 1.36 |
| Q5T757 | Serine/arginine-rich splicing factor 11                                                                | SRSF11  | 389     | S | 1     | 115.9 | NaN   | 0.90  | 0.87 | 0.98 | 1.01 | 0.96 | 0.92 | NaN  | 0.90 |
| Q5T757 | Serine/arginine-rich splicing factor 11                                                                | SRSF11  | 147     | S | 0.994 | 113.5 | 2.82  | 2.73  | 3.13 | 3.72 | NaN  | 3.27 | 1.18 | 1.24 | 1.65 |
| Q96PN7 | Transcriptional-regulating factor 1                                                                    | BCAR2   | 491;491 | S | 0.991 | 78.4  | 0.43  | 0.44  | 0.35 | 0.62 | 0.61 | 0.54 | 0.67 | 0.60 | 0.62 |
| Q06210 | Glutamine--fructose-6-phosphate aminotransferase [isomerizing] 1                                       | GFPT1   | 261     | S | 0.905 | 100.2 | 22.02 | 20.07 | NaN  | NaN  | NaN  | NaN  | NaN  | NaN  | NaN  |
| Q07065 | Cytoskeleton-associated protein 4                                                                      | CKAP4   | 17      | S | 0.987 | 129.8 | 2.84  | NaN   | NaN  | 4.15 | 5.10 | NaN  | NaN  | NaN  | NaN  |
| Q08211 | ATP-dependent RNA helicase                                                                             | DHX9    | 87      | S | 1     | 247.7 | 0.95  | 0.97  | 0.98 | 1.42 | 1.16 | 1.34 | 0.74 | 0.83 | 0.87 |
| Q08AD1 | Calmodulin-regulated spectrin-associated protein 2                                                     | CAMSAP2 | 599     | S | 0.733 | 56.47 | NaN   | NaN   | NaN  | 0.75 | 0.65 | 1.04 | 0.86 | 0.88 | NaN  |
| Q08AD1 | Calmodulin-regulated spectrin-associated protein 2                                                     | CAMSAP2 | 464     | S | 0.999 | 103.6 | NaN   | 2.38  | 2.50 | 1.91 | NaN  | NaN  | 1.80 | 2.10 | 2.17 |



|        |                                                      |        |      |   |       |       |      |      |      |      |      |      |      |      |      |
|--------|------------------------------------------------------|--------|------|---|-------|-------|------|------|------|------|------|------|------|------|------|
| Q09666 | Neuroblast differentiation-associated protein AHNAK  | AHNAK  | 5782 | S | 0.999 | 147.3 | 1.09 | 1.14 | 1.17 | 0.93 | 0.93 | 0.94 | 1.43 | 1.43 | 1.45 |
| Q09666 | Neuroblast differentiation-associated protein AHNAK  | AHNAK  | 5745 | S | 0.62  | 118.4 | 0.42 | NaN  | 0.90 | NaN  | NaN  | 0.33 | NaN  | NaN  | NaN  |
| Q09666 | Neuroblast differentiation-associated protein AHNAK  | AHNAK  | 5746 | S | 0.659 | 118.4 | 0.42 | 0.44 | 0.90 | NaN  | NaN  | 0.33 | NaN  | NaN  | NaN  |
| Q09666 | Neuroblast differentiation-associated protein AHNAK  | AHNAK  | 3426 | S | 1     | 107.8 | 3.73 | 3.94 | 4.23 | 3.51 | 3.86 | 3.23 | 1.51 | 1.68 | 1.40 |
| Q0JRZ9 | F-BAR domain only protein 2                          | FCHO2  | 403  | S | 1     | 80.78 | 1.15 | 1.22 | 1.23 | 0.91 | 0.98 | 0.98 | 1.24 | 1.29 | 1.29 |
| Q12802 | A-kinase anchor protein 13                           | AKAP13 | 2398 | S | 0.728 | 61.11 | NaN  | 0.76 | 1.23 | 1.17 | NaN  | NaN  | NaN  | NaN  | NaN  |
| Q12872 | Splicing factor, suppressor of white-apricot homolog | SFSWAP | 604  | S | 0.992 | 174.9 | 0.93 | 0.93 | 0.87 | 0.91 | 0.96 | 0.92 | 0.86 | NaN  | 0.85 |
| Q12906 | Interleukin enhancer-binding factor 3                | ILF3   | 482  | S | 1     | 156.2 | 0.73 | 0.69 | NaN  | 0.85 | 0.88 | NaN  | 0.85 | NaN  | 0.84 |
| Q12906 | Interleukin enhancer-binding factor 3                | ILF3   | 382  | S | 1     | 226.1 | 0.55 | 0.55 | 0.55 | 1.06 | 1.07 | 0.95 | 0.36 | 0.37 | 0.35 |
| Q12906 | Interleukin enhancer-binding factor 3                | ILF3   | 384  | S | 0.888 | 96.39 | 0.55 | NaN  | 0.55 | 1.01 | 1.06 | NaN  | 0.56 | 0.44 | 0.43 |
| Q5T8C6 | Cell division cycle protein 16 homolog               | CDC16  | 415  | S | 1     | 48.57 | 1.41 | 1.65 | NaN  | NaN  | NaN  | NaN  | NaN  | NaN  | NaN  |
| Q13045 | Protein flightless-1 homolog                         | FLII   | 856  | S | 1     | 154.5 | NaN  | 1.02 | 1.05 | NaN  | 1.21 | 1.25 | 1.36 | 1.33 | 1.43 |
| Q13085 | Acetyl-CoA carboxylase 1;Biotin carboxylase          | ACACA  | 23   | S | 0.641 | 109.7 | 0.75 | 0.68 | NaN  | NaN  | 1.31 | NaN  | NaN  | NaN  | NaN  |
| Q13085 | Acetyl-CoA carboxylase 1;Biotin carboxylase          | ACACA  | 25   | S | 0.88  | 110.6 | NaN  | NaN  | NaN  | 0.92 | 1.31 | 0.96 | 1.93 | NaN  | 1.62 |
| Q13085 | Acetyl-CoA carboxylase 1;Biotin carboxylase          | ACACA  | 29   | S | 1     | 263.7 | 0.68 | 0.64 | 0.70 | 0.79 | 0.68 | 0.78 | 0.78 | 0.73 | 0.83 |
| Q13085 | Acetyl-CoA carboxylase 1;Biotin carboxylase          | ACACA  | 1259 | S | 0.999 | 210.1 | 0.71 | 0.69 | 0.73 | 0.98 | NaN  | 0.85 | 0.75 | NaN  | 0.71 |
| Q13085 | Acetyl-CoA carboxylase 1;Biotin carboxylase          | ACACA  | 1263 | S | 0.976 | 210.1 | 0.71 | 0.69 | 0.73 | 0.98 | NaN  | 0.85 | 0.75 | 0.78 | 0.71 |
| Q13111 | Chromatin assembly factor 1 subunit A                | CHAF1A | 951  | S | 0.951 | 69.67 | 0.53 | 0.58 | NaN  | 0.90 | 0.79 | NaN  | 0.70 | 0.65 | 0.87 |
| Q13112 | Chromatin assembly factor 1 subunit B                | CHAF1B | 409  | S | 0.564 | 61.28 | NaN  | 0.68 | 0.86 | 1.04 | 1.13 | 0.93 | NaN  | NaN  | NaN  |
| Q13112 | Chromatin assembly factor 1 subunit B                | CHAF1B | 410  | S | 0.956 | 98.42 | 0.78 | 0.76 | 0.89 | 1.04 | 0.89 | 1.00 | 0.85 | 0.77 | 1.05 |
| Q13112 | Chromatin assembly factor 1 subunit B                | CHAF1B | 538  | S | 0.992 | 77.45 | 0.59 | 0.69 | NaN  | NaN  | NaN  | 0.96 | 0.54 | NaN  | 0.85 |
| Q13112 | Chromatin assembly factor 1 subunit B                | CHAF1B | 429  | S | 0.97  | 160.8 | 0.64 | 0.52 | NaN  | 0.65 | NaN  | 1.23 | 0.64 | NaN  | 0.61 |
| Q13177 | Serine/threonine-protein kinase PAK 2;PAK-2p27;PAK-  | PAK2   | 141  | S | 1     | 197.7 | 2.05 | 1.98 | 2.23 | 2.83 | 2.94 | 2.96 | 1.04 | 1.01 | 1.06 |
| Q13185 | Chromobox protein homolog 3                          | CBX3   | 93   | S | 1     | 104.4 | 0.63 | 0.93 | 0.66 | 1.04 | 1.44 | 1.32 | 0.74 | 0.79 | 0.93 |
| Q13185 | Chromobox protein homolog 3                          | CBX3   | 95   | S | 1     | 309   | 1.03 | 1.06 | 1.08 | 1.10 | 1.05 | 1.01 | 0.86 | 0.85 | 0.64 |
| Q13185 | Chromobox protein homolog 3                          | CBX3   | 97   | S | 1     | 107.2 | 1.18 | 1.03 | 0.71 | 1.03 | 0.91 | 1.04 | 0.83 | 0.87 | 0.75 |
| Q13185 | Chromobox protein homolog 3                          | CBX3   | 99   | S | 1     | 103.3 | 1.27 | 1.04 | 1.47 | 0.95 | 0.94 | 0.85 | 0.72 | 0.87 | 0.75 |

|        |                                                               |        |      |   |       |       |      |      |      |      |      |      |      |      |      |
|--------|---------------------------------------------------------------|--------|------|---|-------|-------|------|------|------|------|------|------|------|------|------|
| Q13185 | Chromobox protein homolog 3                                   | CBX3   | 176  | S | 0.966 | 124.2 | 1.06 | 1.25 | 1.35 | 1.06 | 1.17 | 0.93 | 1.07 | 0.99 | 1.15 |
| Q13242 | Serine/arginine-rich splicing factor 9                        | SRSF9  | 204  | S | 1     | 108.7 | 1.45 | 1.33 | 1.29 | 1.14 | NaN  | 1.00 | 1.37 | 1.35 | NaN  |
| Q13242 | Serine/arginine-rich splicing factor 9                        | SRSF9  | 211  | S | 1     | 150.5 | 1.02 | 1.06 | 1.03 | 0.93 | 0.90 | 0.96 | 0.97 | 0.97 | 0.99 |
| Q13242 | Serine/arginine-rich splicing factor 9                        | SRSF9  | 216  | S | 1     | 119.5 | 0.90 | 1.03 | 1.00 | 1.10 | 0.92 | 0.82 | 1.13 | 1.13 | 1.07 |
| Q13242 | Serine/arginine-rich splicing factor 9                        | SRSF9  | 189  | S | 0.928 | 42.16 | 1.15 | 1.03 | NaN  | NaN  | 0.90 | NaN  | NaN  | NaN  | NaN  |
| Q13247 | Serine/arginine-rich splicing factor 6                        | SRSF6  | 314  | S | 1     | 78.49 | 1.16 | 1.14 | 1.12 | 1.03 | 1.05 | 1.08 | 1.11 | 1.00 | 1.12 |
| Q13247 | Serine/arginine-rich splicing factor 6                        | SRSF6  | 316  | S | 1     | 86.9  | 1.16 | 1.14 | 0.27 | 0.30 | 0.28 | 0.31 | 0.40 | 0.29 | 0.29 |
| Q13247 | Serine/arginine-rich splicing factor 6                        | SRSF6  | 303  | S | 1     | 172.3 | 1.05 | 1.02 | 1.15 | 0.98 | 1.00 | 1.01 | 0.91 | 0.91 | 0.95 |
| Q13263 | Transcription intermediary factor 1-beta                      | TRIM28 | 50   | S | 0.995 | 169.4 | 1.02 | 0.97 | 0.82 | 1.08 | NaN  | NaN  | 1.08 | NaN  | NaN  |
| Q13283 | Ras GTPase-activating protein-binding protein 1               | G3BP1  | 232  | S | 1     | 494   | 1.26 | 1.29 | 1.43 | 1.09 | NaN  | 1.11 | 1.17 | 1.04 | 1.21 |
| Q13283 | Ras GTPase-activating protein-binding protein 1               | G3BP1  | 149  | S | 1     | 148.2 | 1.20 | 1.32 | 2.34 | 1.64 | NaN  | 1.16 | 1.15 | 1.25 | NaN  |
| Q13425 | Beta-2-syntrophin                                             | SNTB2  | 95   | S | 1     | 160.4 | NaN  | 1.01 | 0.92 | NaN  | NaN  | 0.95 | NaN  | NaN  | 0.99 |
| Q13425 | Beta-2-syntrophin                                             | SNTB2  | 110  | S | 1     | 112.7 | 0.68 | 0.58 | NaN  | 0.63 | 0.70 | 0.75 | 0.82 | 0.66 | 0.83 |
| Q13425 | Beta-2-syntrophin                                             | SNTB2  | 233  | S | 0.879 | 125.4 | 0.70 | 0.61 | 0.60 | 0.64 | 0.61 | 0.55 | 0.89 | 0.90 | 0.83 |
| Q13428 | Treacle protein                                               | TCOF1  | 1111 | S | 0.965 | 119.4 | NaN  | NaN  | NaN  | 0.90 | 0.87 | NaN  | NaN  | 0.76 | 0.99 |
| Q13442 | 28 kDa heat- and acid-stable phosphoprotein                   | PDAP1  | 60   | S | 1     | 571.9 | 0.19 | 0.20 | 0.22 | 0.27 | 0.27 | 0.25 | 0.58 | 0.49 | 0.53 |
| Q13442 | 28 kDa heat- and acid-stable phosphoprotein                   | PDAP1  | 63   | S | 1     | 398.3 | NaN  | NaN  | 0.19 | 0.21 | NaN  | 0.23 | 0.50 | 0.55 | 0.45 |
| Q13443 | Disintegrin and metalloproteinase domain-containing protein 9 | ADAM9  | 758  | S | 1     | 99.86 | 1.10 | 1.20 | 1.31 | 0.93 | 1.02 | 1.11 | 1.04 | 0.90 | 1.19 |
| Q13469 | Nuclear factor of activated T-cells, cytoplasmic 2            | NFATC2 | 326  | S | 0.983 | 105.1 | NaN  | NaN  | 1.28 | 0.76 | 0.68 | 0.75 | NaN  | 1.71 | NaN  |
| Q13501 | Sequestosome-1                                                | SQSTM1 | 366  | S | 0.951 | 215.3 | 1.56 | 1.48 | 1.60 | 1.95 | NaN  | 2.01 | 0.83 | NaN  | 0.90 |
| Q13501 | Sequestosome-1                                                | SQSTM1 | 332  | S | 0.998 | 117   | 0.82 | 0.99 | NaN  | NaN  | NaN  | NaN  | NaN  | NaN  | NaN  |
| Q13501 | Sequestosome-1                                                | SQSTM1 | 272  | S | 1     | 205.3 | 1.14 | 1.70 | 1.12 | 2.61 | 2.65 | 1.45 | 0.64 | 0.61 | 0.61 |
| Q13501 | Sequestosome-1                                                | SQSTM1 | 24   | S | 0.961 | 145.8 | 3.27 | 2.86 | NaN  | 3.83 | 4.80 | 4.30 | NaN  | NaN  | NaN  |
| Q13501 | Sequestosome-1                                                | SQSTM1 | 28   | S | 0.688 | 100.9 | NaN  | NaN  | 3.13 | NaN  | 4.80 | NaN  | 0.86 | 0.77 | NaN  |
| Q13501 | Sequestosome-1                                                | SQSTM1 | 284  | S | 0.95  | 161.7 | 1.09 | 1.26 | NaN  | 1.75 | NaN  | NaN  | NaN  | NaN  | NaN  |
| Q13523 | Serine/threonine-protein kinase PRP4 homolog                  | PRPF4B | 257  | S | 0.998 | 100.4 | 0.88 | 0.88 | 0.91 | 0.89 | 0.87 | 0.92 | 0.90 | 0.89 | 0.90 |
| Q13523 | Serine/threonine-protein kinase PRP4 homolog                  | PRPF4B | 431  | S | 1     | 83.82 | NaN  | 1.19 | 1.40 | 0.85 | 1.17 | 0.94 | 0.68 | 0.59 | 0.96 |
| Q13523 | Serine/threonine-protein kinase PRP4 homolog                  | PRPF4B | 437  | S | 0.943 | 72.32 | NaN  | 1.19 | 1.40 | 0.95 | 1.17 | 1.23 | 0.68 | 0.59 | 1.55 |

|        |                                                               |          |      |   |       |       |      |      |      |      |      |      |      |      |      |
|--------|---------------------------------------------------------------|----------|------|---|-------|-------|------|------|------|------|------|------|------|------|------|
| Q13523 | Serine/threonine-protein kinase PRP4 homolog                  | PRPF4B   | 20   | S | 1     | 123.6 | 0.52 | 0.45 | 0.40 | NaN  | 0.62 | 0.66 | 0.39 | 0.42 | 0.42 |
| Q13523 | Serine/threonine-protein kinase PRP4 homolog                  | PRPF4B   | 277  | S | 1     | 85.99 | 0.88 | 0.91 | 0.84 | NaN  | NaN  | 0.94 | 0.84 | 0.89 | 0.92 |
| Q13523 | Serine/threonine-protein kinase PRP4 homolog                  | PRPF4B   | 427  | S | 1     | 45.83 | NaN  | 1.19 | NaN  | NaN  | NaN  | NaN  | NaN  | 1.36 | 1.61 |
| Q13523 | Serine/threonine-protein kinase PRP4 homolog                  | PRPF4B   | 368  | S | 1     | 75.48 | 1.05 | 0.48 | NaN  | NaN  | NaN  | NaN  | NaN  | NaN  | NaN  |
| Q13523 | Serine/threonine-protein kinase PRP4 homolog                  | PRPF4B   | 578  | S | 0.975 | 98.42 | 0.36 | 0.36 | NaN  | NaN  | 0.49 | 0.49 | NaN  | NaN  | NaN  |
| Q13523 | Serine/threonine-protein kinase PRP4 homolog                  | PRPF4B   | 580  | S | 1     | 98.42 | 0.36 | 0.36 | NaN  | NaN  | 0.49 | 0.49 | NaN  | NaN  | NaN  |
| Q13541 | Eukaryotic translation initiation factor 4E-binding protein 1 | EIF4EBP1 | 96   | S | 0.515 | 176.9 | NaN  | NaN  | NaN  | NaN  | NaN  | NaN  | 0.81 | NaN  | 0.55 |
| Q13541 | Eukaryotic translation initiation factor 4E-binding protein 1 | EIF4EBP1 | 65   | S | 0.991 | 152.9 | 2.90 | 2.76 | 2.72 | 2.12 | 0.86 | 2.39 | 2.18 | 2.00 | 2.30 |
| Q13547 | Histone deacetylase 1                                         | HDAC1    | 393  | S | 1     | 144.3 | 0.63 | 0.57 | NaN  | 0.92 | 0.77 | 0.67 | 0.54 | 0.56 | 0.55 |
| Q13595 | Transformer-2 protein homolog alpha                           | TRA2A    | 96   | S | 1     | 70.56 | 0.70 | 0.64 | NaN  | NaN  | NaN  | 0.83 | NaN  | 0.68 | 0.67 |
| Q13595 | Transformer-2 protein homolog alpha                           | TRA2A    | 98   | S | 1     | 70.56 | 0.70 | 0.64 | NaN  | NaN  | NaN  | 0.83 | NaN  | 0.68 | 0.67 |
| Q13595 | Transformer-2 protein homolog alpha                           | TRA2A    | 100  | S | 0.996 | 70.56 | 0.70 | 0.64 | NaN  | NaN  | NaN  | 0.83 | NaN  | 0.68 | 0.67 |
| Q13595 | Transformer-2 protein homolog alpha                           | TRA2A    | 84   | S | 0.962 | 61.44 | 1.08 | NaN  | 0.97 | 0.90 | 0.83 | 0.94 | 1.32 | 1.24 | 1.25 |
| Q13610 | Periodic tryptophan protein 1 homolog                         | PWP1     | 50   | S | 1     | 151.5 | 0.55 | 0.49 | 0.50 | 0.61 | 0.66 | 0.64 | 0.69 | 0.62 | 0.72 |
| Q13614 | Myotubularin-related protein 2                                | MTMR2    | 630  | S | 0.562 | 54.65 | 1.27 | 1.03 | NaN  | 0.70 | 0.60 | NaN  | NaN  | NaN  | NaN  |
| Q13625 | Apoptosis-stimulating of p53 protein 2                        | TP53BP2  | 698  | S | 0.969 | 65.84 | 0.88 | 0.90 | NaN  | 0.96 | NaN  | 0.94 | NaN  | 0.93 | NaN  |
| Q13905 | Rap guanine nucleotide exchange factor 1                      | RAPGEF1  | 296  | S | 0.94  | 87.57 | 0.86 | 0.81 | 0.92 | 0.73 | 0.78 | 0.84 | NaN  | NaN  | 1.08 |
| Q14166 | Tubulin--tyrosine ligase-like protein 12                      | TTLL12   | 16   | S | 0.994 | 305.8 | 0.70 | 0.47 | NaN  | 0.88 | 0.79 | 0.85 | 0.79 | 0.85 | NaN  |
| Q14247 | Src substrate cortactin                                       | CTTN     | 405  | S | 1     | 252.6 | 1.08 | 1.02 | 0.68 | 1.04 | 2.76 | 1.90 | 0.83 | 0.89 | 1.44 |
| Q14247 | Src substrate cortactin                                       | CTTN     | 417  | S | 0.726 | 196.4 | 0.79 | 0.79 | 3.10 | 1.32 | 1.48 | 0.68 | 1.08 | 0.86 | 0.83 |
| Q14247 | Src substrate cortactin                                       | CTTN     | 418  | S | 0.999 | 246.6 | 1.31 | 1.33 | 0.99 | 1.35 | 1.44 | 1.34 | 0.95 | 0.96 | 0.92 |
| Q14315 | Filamin-C                                                     | FLNC     | 2233 | S | 0.999 | 70.41 | 2.61 | 2.32 | NaN  | NaN  | NaN  | NaN  | 3.56 | 4.24 | NaN  |
| Q14566 | DNA replication licensing factor MCM6                         | MCM6     | 762  | S | 1     | 194.6 | NaN  | 1.31 | NaN  | NaN  | NaN  | NaN  | 0.74 | 0.66 | 0.95 |
| Q14573 | Inositol 1,4,5-trisphosphate receptor type 3                  | ITPR3    | 2670 | S | 1     | 88.51 | 0.93 | 1.05 | 0.88 | NaN  | NaN  | NaN  | 2.32 | 2.23 | 2.45 |
| Q14669 | E3 ubiquitin-protein ligase TRIP12                            | TRIP12   | 77   | S | 0.935 | 46.02 | NaN  | NaN  | NaN  | 1.27 | 1.00 | 1.23 | 0.81 | 0.86 | NaN  |
| Q14669 | E3 ubiquitin-protein ligase TRIP12                            | TRIP12   | 312  | S | 1     | 84.73 | 1.15 | 1.08 | 1.29 | 1.03 | 1.20 | NaN  | 1.13 | 1.01 | NaN  |

|        |                                                           |         |      |   |       |       |      |      |      |      |      |      |      |      |      |
|--------|-----------------------------------------------------------|---------|------|---|-------|-------|------|------|------|------|------|------|------|------|------|
| Q14669 | E3 ubiquitin-protein ligase TRIP12                        | TRIP12  | 1016 | S | 0.934 | 47.02 | NaN  | NaN  | 0.55 | NaN  | 0.60 | NaN  | 0.72 | 0.71 | 0.67 |
| Q14676 | Mediator of DNA damage checkpoint protein 1               | MDC1    | 329  | S | 0.995 | 233.6 | 0.75 | 0.84 | 0.83 | 1.25 | NaN  | 0.99 | 0.68 | 0.56 | 0.55 |
| Q14676 | Mediator of DNA damage checkpoint protein 1               | MDC1    | 376  | S | 0.998 | 296.4 | 1.04 | 1.01 | 1.03 | 0.95 | 1.43 | 0.99 | 0.88 | 0.79 | 0.93 |
| Q14676 | Mediator of DNA damage checkpoint protein 1               | MDC1    | 168  | S | 1     | 114.6 | 1.01 | 1.04 | 0.95 | NaN  | 0.99 | 1.01 | 0.92 | 0.98 | 0.99 |
| Q14676 | Mediator of DNA damage checkpoint protein 1               | MDC1    | 453  | S | 0.953 | 337.1 | 0.98 | 0.95 | 0.91 | 0.97 | NaN  | NaN  | NaN  | NaN  | NaN  |
| Q14677 | Clathrin interactor 1                                     | CLINT1  | 299  | S | 0.797 | 106.2 | 0.78 | NaN  | NaN  | 1.18 | NaN  | NaN  | 0.83 | 0.77 | 0.54 |
| Q14684 | Ribosomal RNA processing protein 1 homolog B              | RRP1B   | 732  | S | 0.922 | 91.71 | NaN  | NaN  | 0.81 | 0.63 | NaN  | NaN  | NaN  | 0.57 | 0.70 |
| Q14684 | Ribosomal RNA processing protein 1 homolog B              | RRP1B   | 245  | S | 1     | 188.6 | 1.70 | 1.42 | 1.71 | 1.79 | 1.74 | 1.72 | 1.41 | 1.41 | 1.42 |
| Q14764 | Major vault protein                                       | MVP     | 873  | S | 1     | 149.7 | 0.86 | NaN  | 0.85 | NaN  | 1.15 | 1.93 | 1.36 | NaN  | 0.97 |
| Q14814 | Myocyte-specific enhancer factor 2D                       | MEF2D   | 251  | S | 0.999 | 75.72 | 1.73 | 1.48 | 1.78 | 1.67 | 1.77 | 1.97 | 1.28 | 1.51 | NaN  |
| Q14966 | Zinc finger protein 638                                   | ZNF638  | 1400 | S | 0.716 | 91.87 | NaN  | 2.37 | 1.84 | 2.42 | 2.05 | 2.30 | 1.50 | 1.11 | 1.49 |
| Q14966 | Zinc finger protein 638                                   | ZNF638  | 1401 | S | 0.5   | 85.73 | NaN  | NaN  | 1.84 | NaN  | 2.05 | NaN  | NaN  | 1.11 | 1.49 |
| Q14993 | Collagen alpha-1(XIX) chain GTPase-activating protein and | COL19A1 | 81   | S | 1     | 50.37 | NaN  | 0.68 | 0.77 | NaN  | NaN  | NaN  | NaN  | 0.72 | NaN  |
| Q14C86 | VPS9 domain-containing protein 1                          | GAPVD1  | 946  | S | 0.649 | 259   | NaN  | NaN  | NaN  | 1.29 | 1.27 | NaN  | NaN  | NaN  | NaN  |
| Q15007 | Pre-mRNA-splicing regulator WTAP                          | WTAP    | 306  | S | 0.99  | 288   | 1.06 | 0.99 | NaN  | NaN  | NaN  | NaN  | 1.36 | NaN  | NaN  |
| Q15036 | Sorting nexin-17                                          | SNX17   | 333  | S | 0.551 | 121.3 | NaN  | NaN  | NaN  | NaN  | NaN  | NaN  | NaN  | 0.78 | 0.90 |
| Q15059 | Bromodomain-containing protein 3                          | BRD3    | 263  | S | 0.994 | 100.9 | 0.79 | 0.99 | 0.67 | 0.75 | NaN  | 0.78 | 0.84 | 0.80 | 0.79 |
| Q15061 | WD repeat-containing protein 43                           | WDR43   | 77   | S | 1     | 117.2 | 0.90 | 0.99 | 0.92 | 0.98 | 0.96 | 0.98 | 0.85 | 0.85 | 0.82 |
| Q15084 | Protein disulfide-isomerase A6                            | PDIA6   | 428  | S | 1     | 344.7 | 1.11 | 1.19 | 1.28 | 0.98 | 0.96 | 0.98 | 1.41 | 1.11 | 1.00 |
| Q15149 | Plectin                                                   | PLEC    | 1435 | S | 1     | 108.4 | 1.31 | 1.25 | 1.22 | 1.89 | 2.07 | 1.77 | 0.86 | 1.08 | 0.85 |
| Q15149 | Plectin                                                   | PLEC    | 720  | S | 1     | 160.5 | 1.40 | 1.39 | 1.42 | 1.73 | 1.75 | 1.61 | NaN  | 1.33 | 1.16 |
| Q15149 | Plectin                                                   | PLEC    | 4613 | S | 1     | 247.4 | 1.26 | 1.35 | 1.16 | 1.26 | 1.36 | 1.34 | 1.96 | 1.86 | 1.94 |
| Q15149 | Plectin                                                   | PLEC    | 4386 | S | 1     | 366.2 | 1.69 | 1.72 | 1.76 | 1.15 | 1.15 | 1.26 | 2.20 | 2.25 | 2.41 |
| Q15149 | Plectin                                                   | PLEC    | 4396 | S | 0.999 | 267.6 | 2.80 | 2.67 | 2.36 | 1.87 | 2.23 | 2.18 | 2.31 | 2.08 | 2.26 |
| Q15149 | Plectin                                                   | PLEC    | 125  | S | 1     | 78.78 | 0.99 | 0.81 | 0.96 | NaN  | 1.21 | NaN  | NaN  | 1.28 | NaN  |
| Q15149 | Plectin                                                   | PLEC    | 4406 | S | 0.896 | 199.2 | 1.10 | 1.30 | 0.97 | 1.30 | NaN  | 1.99 | 1.13 | NaN  | 1.20 |
| Q15311 | RalA-binding protein 1                                    | RALBP1  | 645  | S | 0.964 | 59.71 | 0.63 | 0.76 | 0.81 | NaN  | 0.80 | 0.79 | 1.04 | 1.00 | 1.00 |
| Q15311 | RalA-binding protein 1                                    | RALBP1  | 92   | S | 0.999 | 115.4 | 0.72 | 0.67 | 0.86 | 0.65 | 0.67 | 0.67 | 0.97 | 0.93 | 1.00 |
| Q15311 | RalA-binding protein 1                                    | RALBP1  | 93   | S | 0.999 | 115.4 | 0.72 | 0.67 | 0.86 | 0.65 | 0.67 | 0.67 | 0.97 | 0.93 | 1.00 |
| Q15311 | RalA-binding protein 1                                    | RALBP1  | 48   | S | 0.988 | 91.44 | 1.44 | 1.55 | NaN  | NaN  | NaN  | NaN  | NaN  | NaN  | NaN  |
| Q15311 | RalA-binding protein 1                                    | RALBP1  | 62   | S | 1     | 91.44 | 1.44 | 1.55 | NaN  | NaN  | NaN  | NaN  | NaN  | NaN  | NaN  |
| Q15311 | RalA-binding protein 1                                    | RALBP1  | 29   | S | 0.716 | 41.52 | NaN  | 1.96 | NaN  | NaN  | NaN  | NaN  | 1.61 | 1.39 | NaN  |
| Q15365 | Poly(rC)-binding protein 1                                | PCBP1   | 171  | S | 0.937 | 284.2 | 0.68 | 0.79 | NaN  | NaN  | NaN  | NaN  | NaN  | NaN  | NaN  |
| Q15365 | Poly(rC)-binding protein 1                                | PCBP1   | 173  | S | 1     | 340.6 | 1.01 | 1.12 | 1.04 | 1.37 | 1.38 | 1.39 | 0.75 | 0.79 | 1.31 |



|        |                                                             |        |      |   |       |       |      |      |      |      |      |      |      |      |      |
|--------|-------------------------------------------------------------|--------|------|---|-------|-------|------|------|------|------|------|------|------|------|------|
| Q15365 | Poly(rC)-binding protein 1                                  | PCBP1  | 190  | S | 0.961 | 122.5 | 1.59 | 1.75 | 1.67 | 2.95 | NaN  | 2.91 | 1.03 | 0.97 | 1.09 |
| Q15366 | Poly(rC)-binding protein 2                                  | PCBP2  | 189  | S | 0.652 | 127.2 | NaN  | 2.06 | 1.67 | NaN  | NaN  | NaN  | NaN  | 1.06 | NaN  |
| Q15366 | Poly(rC)-binding protein 2                                  | PCBP2  | 173  | S | 0.996 | 93.5  | 0.60 | 0.43 | NaN  | 0.72 | 0.88 | NaN  | 0.61 | 0.53 | NaN  |
| Q15398 | Disks large-associated protein 5                            | DLGAP5 | 662  | S | 0.987 | 79.46 | NaN  | 0.77 | NaN  | NaN  | 1.76 | NaN  | 0.47 | 0.38 | 0.52 |
| Q15398 | Disks large-associated protein 5                            | DLGAP5 | 690  | S | 0.775 | 108.7 | 4.96 | 3.27 | NaN  | NaN  | NaN  | NaN  | NaN  | NaN  | NaN  |
| Q15424 | Scaffold attachment factor B1                               | SAFB   | 383  | S | 1     | 222   | 0.65 | 0.66 | 0.65 | 0.99 | 0.94 | 0.98 | 0.52 | 0.55 | 0.57 |
| Q15424 | Scaffold attachment factor B1                               | SAFB   | 384  | S | 0.998 | 222   | 0.65 | 0.66 | 0.65 | 0.99 | 0.99 | 0.98 | 0.52 | 0.55 | 0.57 |
| Q15424 | Scaffold attachment factor B1                               | SAFB   | 604  | S | 1     | 113.8 | 1.07 | 1.12 | 0.99 | 1.14 | 1.05 | 1.03 | 1.17 | 1.43 | NaN  |
| Q15424 | Scaffold attachment factor B1;Scaffold attachment factor B2 | SAFB   | 344  | S | 0.969 | 101.2 | NaN  | 1.53 | NaN  | NaN  | 1.74 | NaN  | 1.55 | 1.75 | NaN  |
| Q15459 | Splicing factor 3A subunit 1                                | SF3A1  | 451  | S | 0.994 | 55.03 | 1.58 | 0.94 | NaN  | 1.51 | NaN  | NaN  | NaN  | NaN  | NaN  |
| Q15459 | Splicing factor 3A subunit 1                                | SF3A1  | 329  | S | 1     | 211.1 | 0.98 | 0.78 | 0.93 | 0.91 | 1.05 | 0.95 | 1.04 | 0.59 | 0.61 |
| Q15477 | Helicase SKI2W                                              | SKI2L  | 256  | S | 0.999 | 145.1 | 0.17 | 0.14 | NaN  | 0.22 | 0.19 | 0.19 | 1.01 | 1.00 | 0.91 |
| Q15545 | Transcription initiation factor TFIID subunit 7             | TAF7   | 201  | S | 0.8   | 65.75 | 1.45 | NaN  | NaN  | 1.33 | 1.03 | 1.46 | 1.05 | 0.88 | 1.03 |
| Q15637 | Splicing factor 1                                           | SF1    | 80   | S | 1     | 188.3 | 1.02 | 1.06 | 0.95 | 1.00 | 0.98 | 0.96 | 0.84 | 0.87 | 0.91 |
| Q15637 | Splicing factor 1                                           | SF1    | 82   | S | 1     | 188.3 | 1.02 | 1.06 | 0.95 | 1.00 | 1.01 | 0.96 | 0.84 | 0.87 | 0.91 |
| Q15648 | Mediator of RNA polymerase II transcription subunit 1       | MED1   | 1049 | S | 0.544 | 44.2  | 0.64 | 0.79 | NaN  | NaN  | NaN  | 0.81 | NaN  | NaN  | NaN  |
| Q15648 | Mediator of RNA polymerase II transcription subunit 1       | MED1   | 1479 | S | 0.998 | 85    | 0.80 | 0.65 | 0.74 | 0.87 | 0.89 | 0.91 | NaN  | 0.78 | 0.69 |
| Q15648 | Mediator of RNA polymerase II transcription subunit 1       | MED1   | 1481 | S | 0.566 | 59.66 | NaN  | NaN  | 0.74 | NaN  | 0.89 | 0.91 | NaN  | NaN  | NaN  |
| Q15648 | Mediator of RNA polymerase II transcription subunit 1       | MED1   | 1482 | S | 0.805 | 85    | 0.80 | 0.65 | NaN  | 0.87 | NaN  | NaN  | NaN  | 0.78 | 0.69 |
| Q15678 | Tyrosine-protein phosphatase non-receptor type 14           | PTPN14 | 314  | S | 0.995 | 85.74 | 0.98 | NaN  | 1.01 | NaN  | NaN  | 0.77 | 1.25 | 1.06 | 1.26 |
| Q15678 | Tyrosine-protein phosphatase non-receptor type 14           | PTPN14 | 593  | S | 0.998 | 97.2  | NaN  | 1.41 | 1.26 | 0.90 | NaN  | 0.89 | 1.30 | 1.72 | 1.67 |
| Q15678 | Tyrosine-protein phosphatase non-receptor type 14           | PTPN14 | 594  | S | 0.999 | 175.9 | 0.95 | 0.93 | 1.26 | 0.87 | 0.91 | 0.89 | 1.65 | 1.72 | 1.67 |
| Q15942 | Zyxin                                                       | ZYX    | 281  | S | 1     | 105.6 | NaN  | NaN  | 1.73 | 1.81 | 2.30 | 2.75 | NaN  | 1.23 | NaN  |
| Q15942 | Zyxin                                                       | ZYX    | 267  | S | 1     | 93.7  | 1.57 | 1.47 | 1.77 | 1.99 | 2.03 | 1.92 | 1.33 | 1.28 | 1.28 |
| Q15942 | Zyxin                                                       | ZYX    | 259  | S | 0.994 | 87.21 | 7.05 | 9.04 | NaN  | 5.03 | NaN  | NaN  | 4.90 | 3.94 | 4.06 |
| Q15942 | Zyxin                                                       | ZYX    | 344  | S | 1     | 57.57 | 1.94 | 2.04 | NaN  | 2.13 | 2.12 | NaN  | 1.01 | 1.04 | 1.04 |
| Q16204 | Coiled-coil domain-containing protein 6                     | CCDC6  | 244  | S | 1     | 176.3 | 1.74 | 1.69 | 1.62 | 1.87 | 1.89 | 1.76 | 1.10 | 1.09 | 1.05 |
| Q16204 | Coiled-coil domain-containing protein 6                     | CCDC6  | 419  | S | 0.999 | 85.54 | 0.89 | 0.93 | 0.85 | 0.82 | 0.80 | 0.88 | 0.99 | 0.88 | 0.91 |
| Q16512 | Serine/threonine-protein kinase N1                          | PKN1   | 562  | S | 0.74  | 118   | NaN  | NaN  | NaN  | 0.75 | 0.99 | NaN  | NaN  | NaN  | NaN  |
| Q16512 | Serine/threonine-protein kinase N1                          | PKN1   | 916  | S | 0.999 | 273.3 | NaN  | 1.02 | 0.98 | 0.74 | 0.89 | NaN  | 0.98 | 1.17 | 1.04 |

|        |                                                      |          |      |   |       |       |      |      |      |      |      |      |      |      |      |
|--------|------------------------------------------------------|----------|------|---|-------|-------|------|------|------|------|------|------|------|------|------|
| Q16513 | Serine/threonine-protein kinase N2                   | PKN2     | 583  | S | 1     | 208.5 | 0.84 | 1.00 | 0.98 | 0.93 | 0.99 | 1.14 | 0.95 | 0.93 | 1.03 |
| Q16514 | Transcription initiation factor TFIID subunit 12     | TAF12    | 51   | S | 0.838 | 59.28 | NaN  | 0.99 | NaN  | NaN  | NaN  | NaN  | 0.91 | 0.93 | NaN  |
| Q16643 | Drebrin                                              | DBN1     | 142  | S | 0.998 | 99.26 | 0.91 | 1.00 | 0.97 | 0.78 | 0.79 | 0.79 | 1.31 | 1.39 | 1.44 |
| Q1RLN5 | Rho GTPase-activating protein 12                     | ARHGAP12 | 240  | S | 1     | 117.9 | 0.59 | 0.60 | 0.65 | 0.84 | 0.87 | 0.70 | 0.86 | 0.78 | 0.80 |
| Q27J81 | Inverted formin-2                                    | INF2     | 1149 | S | 0.876 | 88.74 | 1.27 | 1.13 | NaN  | 0.66 | NaN  | NaN  | NaN  | 1.19 | NaN  |
| Q2M2I8 | AP2-associated protein kinase 1                      | AAK1     | 623  | S | 0.866 | 131.1 | 1.29 | NaN  | 1.41 | 1.26 | 1.28 | 1.34 | 1.53 | 1.48 | 1.49 |
| Q32MZ4 | Leucine-rich repeat flightless-interacting protein 1 | LRRFIP1  | 733  | S | 0.999 | 327.2 | NaN  | NaN  | 0.72 | 0.87 | 0.85 | 0.90 | NaN  | 1.23 | 1.24 |
| Q32MZ4 | Leucine-rich repeat flightless-interacting protein 1 | LRRFIP1  | 714  | S | 0.988 | 205.5 | 0.50 | 0.51 | NaN  | 0.80 | 0.84 | 0.80 | NaN  | 0.93 | 0.93 |
| Q32MZ4 | Leucine-rich repeat flightless-interacting protein 1 | LRRFIP1  | 120  | S | 0.928 | 114.5 | 1.30 | NaN  | NaN  | NaN  | NaN  | 1.14 | 1.25 | NaN  | 1.28 |
| Q32MZ4 | Leucine-rich repeat flightless-interacting protein 1 | LRRFIP1  | 521  | S | 0.984 | 155.3 | NaN  | NaN  | NaN  | 1.58 | NaN  | 0.87 | 0.85 | NaN  | NaN  |
| Q3KQU3 | MAP7 domain-containing protein 1                     | MAP7D1   | 741  | S | 0.791 | 127.9 | NaN  | 0.56 | 0.54 | NaN  | NaN  | NaN  | NaN  | 0.68 | NaN  |
| Q3KQU3 | MAP7 domain-containing protein 1                     | MAP7D1   | 544  | S | 0.998 | 96.56 | 1.32 | 1.02 | 2.08 | 1.16 | NaN  | 1.68 | 1.12 | 1.63 | 0.88 |
| Q3KQU3 | MAP7 domain-containing protein 1                     | MAP7D1   | 552  | S | 0.981 | 96.56 | 1.32 | 2.32 | 2.08 | NaN  | NaN  | 1.68 | 1.55 | 1.63 | 1.36 |
| Q3KQU3 | MAP7 domain-containing protein 1                     | MAP7D1   | 460  | S | 0.965 | 79.27 | NaN  | 2.01 | 2.21 | 1.93 | 2.05 | 1.95 | 1.30 | 1.15 | 1.17 |
| Q3KQU3 | MAP7 domain-containing protein 1                     | MAP7D1   | 86   | S | 0.862 | 147.4 | NaN  | 1.27 | 1.11 | 0.54 | NaN  | 1.47 | 0.90 | NaN  | 1.22 |
| Q3KQU3 | MAP7 domain-containing protein 1                     | MAP7D1   | 113  | S | 0.774 | 59.05 | 1.44 | 1.42 | 1.28 | 1.17 | 1.17 | 1.03 | 0.90 | 0.82 | 0.89 |
| Q3KQU3 | MAP7 domain-containing protein 1                     | MAP7D1   | 116  | S | 0.837 | 59.05 | 1.44 | 1.42 | 1.28 | 1.17 | 1.17 | 1.31 | 0.90 | 0.82 | 0.89 |
| Q4G0J3 | La-related protein 7                                 | LARP7    | 337  | S | 1     | 115.3 | 1.07 | 1.03 | 1.12 | NaN  | 1.20 | 0.91 | 1.31 | 1.14 | 0.97 |
| Q4G0J3 | La-related protein 7                                 | LARP7    | 261  | S | 1     | 144.3 | 0.88 | 0.89 | NaN  | 1.31 | NaN  | NaN  | NaN  | 0.94 | NaN  |
| Q4KMP7 | TBC1 domain family member 10B                        | TBC1D10B | 678  | S | 1     | 59.25 | 1.24 | 1.19 | 1.37 | 1.07 | NaN  | 1.14 | NaN  | 1.20 | 1.22 |
| Q4KMP7 | TBC1 domain family member 10B                        | TBC1D10B | 132  | S | 1     | 120   | NaN  | 0.38 | 0.96 | 0.64 | 0.87 | 0.65 | NaN  | 1.19 | 1.21 |
| Q4L180 | Filamin A-interacting protein 1-like                 | FILIP1L  | 791  | S | 1     | 68.17 | 0.84 | 0.87 | NaN  | NaN  | NaN  | NaN  | NaN  | NaN  | NaN  |
| Q4VCS5 | Angiomotin                                           | AMOT     | 4    | S | 1     | 61.17 | 0.83 | NaN  | 0.87 | 0.70 | 0.78 | 0.74 | 0.90 | 0.94 | NaN  |
| Q4VCS5 | Angiomotin                                           | AMOT     | 9    | S | 0.691 | 61.17 | 0.83 | NaN  | 0.87 | 0.70 | 0.78 | 0.74 | 0.90 | 0.94 | NaN  |
| Q52LW3 | Rho GTPase-activating protein 29                     | ARHGAP29 | 949  | S | 1     | 151.1 | 1.20 | 1.23 | 1.22 | 1.33 | 1.42 | 1.34 | 1.30 | 1.41 | 1.31 |
| Q52LW3 | Rho GTPase-activating protein 29                     | ARHGAP29 | 589  | S | 0.999 | 132.1 | NaN  | NaN  | NaN  | NaN  | 0.49 | 0.88 | 0.46 | 0.79 | 0.79 |

|        |                                                       |          |      |   |       |       |      |      |      |      |      |      |      |      |      |
|--------|-------------------------------------------------------|----------|------|---|-------|-------|------|------|------|------|------|------|------|------|------|
| Q52LW3 | Rho GTPase-activating protein 29                      | ARHGAP29 | 1185 | S | 0.985 | 106.9 | NaN  | 1.52 | 1.67 | 2.09 | 2.18 | 1.70 | 1.08 | 1.00 | 1.05 |
| Q52LW3 | Rho GTPase-activating protein 29                      | ARHGAP29 | 190  | S | 1     | 259.2 | 1.09 | 0.98 | 1.60 | 1.73 | 1.83 | 1.94 | 0.48 | 0.30 | 0.72 |
| Q52LW3 | Rho GTPase-activating protein 29                      | ARHGAP29 | 499  | S | 1     | 106.4 | 0.87 | NaN  | 1.13 | NaN  | 0.88 | NaN  | 1.46 | 1.54 | NaN  |
| Q52LW3 | Rho GTPase-activating protein 29                      | ARHGAP29 | 913  | S | 1     | 210.1 | 0.95 | 1.02 | 0.84 | 1.61 | 1.54 | 1.37 | 0.55 | NaN  | 0.48 |
| Q52LW3 | Rho GTPase-activating protein 29                      | ARHGAP29 | 1029 | S | 1     | 142.1 | NaN  | 1.05 | 1.01 | 1.31 | 1.33 | 1.34 | 0.92 | 0.93 | 0.94 |
| Q52LW3 | Rho GTPase-activating protein 29                      | ARHGAP29 | 171  | S | 1     | 161.9 | NaN  | NaN  | 0.72 | 0.70 | 0.63 | NaN  | 1.10 | 1.28 | 1.34 |
| Q52LW3 | Rho GTPase-activating protein 29                      | ARHGAP29 | 559  | S | 0.976 | 173   | 0.60 | NaN  | 0.67 | 0.96 | 0.87 | 0.88 | 0.68 | 0.74 | NaN  |
| Q5VZS7 | Programmed cell death protein 4                       | PDCD4    | 80   | S | 0.752 | 155.2 | 0.76 | 0.75 | NaN  | NaN  | NaN  | 0.87 | NaN  | NaN  | 1.08 |
| Q53EZ4 | Centrosomal protein of 55 kDa                         | CEP55    | 428  | S | 0.978 | 171   | 1.58 | 1.61 | 1.59 | 2.32 | 1.03 | 1.81 | 0.66 | 0.75 | 0.66 |
| Q53EZ4 | Centrosomal protein of 55 kDa                         | CEP55    | 425  | S | 1     | 171   | 1.68 | 1.65 | 2.04 | 2.32 | 2.70 | 2.77 | 0.76 | NaN  | 0.86 |
| Q53F19 | Uncharacterized protein C17orf85                      | C17orf85 | 415  | S | 0.993 | 77.74 | NaN  | NaN  | NaN  | 1.09 | 1.19 | 0.99 | 0.44 | NaN  | NaN  |
| Q58WW2 | DDB1- and CUL4-associated factor 6                    | DCAF6    | 657  | S | 0.999 | 76.2  | 0.61 | 0.62 | 0.62 | NaN  | NaN  | NaN  | NaN  | NaN  | NaN  |
| Q5C9Z4 | Nucleolar MIF4G domain-containing protein 1           | NOM1     | 139  | S | 0.978 | 47.92 | NaN  | 0.86 | 1.03 | NaN  | 0.88 | 0.98 | NaN  | 0.96 | NaN  |
| Q5H909 | Melanoma-associated antigen D2                        | MAGED2   | 173  | S | 0.999 | 233.3 | 0.63 | 0.70 | 0.66 | 0.64 | NaN  | 0.65 | 1.02 | 1.10 | 1.02 |
| Q5JPT2 | SH3 domain-containing kinase-binding protein 1        | SH3KBP1  | 567  | S | 0.999 | 133.2 | 3.33 | 4.27 | 3.89 | 2.43 | 2.83 | 2.41 | 2.93 | 2.95 | 2.80 |
| Q5JSH3 | WD repeat-containing protein 44                       | WDR44    | 96   | S | 0.985 | 172.1 | NaN  | 2.11 | 2.20 | NaN  | NaN  | 1.83 | 2.90 | 2.44 | 1.71 |
| Q5JSH3 | WD repeat-containing protein 44                       | WDR44    | 403  | S | 1     | 367   | 0.71 | 0.77 | 0.84 | 0.87 | 0.83 | 0.90 | 1.04 | 1.10 | 1.10 |
| Q5JSH3 | WD repeat-containing protein 44                       | WDR44    | 162  | S | 0.702 | 184   | 0.82 | NaN  | 0.99 | NaN  | 0.94 | NaN  | 1.25 | NaN  | NaN  |
| Q5JSH3 | WD repeat-containing protein 44                       | WDR44    | 50   | S | 1     | 111.7 | 0.96 | NaN  | NaN  | 0.96 | 0.96 | 0.99 | 1.14 | 1.19 | NaN  |
| Q5JSZ5 | Protein PRRC2B                                        | PRRC2B   | 613  | S | 1     | 59.12 | 1.30 | 1.37 | 1.70 | 1.27 | 1.48 | 1.25 | 0.96 | 1.02 | 0.81 |
| Q5JSZ5 | Protein PRRC2B                                        | PRRC2B   | 556  | S | 0.977 | 82.36 | NaN  | 2.54 | 1.97 | 2.44 | 2.07 | 2.61 | 1.39 | 1.23 | 1.74 |
| Q5JTD0 | Tight junction-associated protein 1                   | TJAP1    | 300  | S | 1     | 281.5 | 0.86 | 0.89 | 0.85 | 0.94 | 0.97 | 0.92 | 0.80 | 0.96 | 0.92 |
| Q5JTH9 | RRP12-like protein                                    | RRP12    | 1080 | S | 1     | 223.4 | 0.89 | 0.69 | 0.88 | 0.95 | 0.94 | 0.81 | 1.06 | 1.03 | 0.96 |
| Q5M775 | Cytospin-B                                            | SPECC1   | 134  | S | 0.991 | 134.9 | 2.50 | 2.50 | 2.06 | NaN  | 1.25 | 1.46 | NaN  | NaN  | 1.49 |
| Q5M775 | Cytospin-B                                            | SPECC1   | 810  | S | 0.955 | 66.92 | NaN  | 1.54 | 1.55 | NaN  | 1.22 | 1.15 | NaN  | 1.54 | 1.43 |
| Q5S007 | Leucine-rich repeat serine/threonine-protein kinase 2 | LRRK2    | 954  | S | 0.998 | 72.73 | NaN  | NaN  | NaN  | 1.05 | 1.10 | NaN  | NaN  | 1.13 | NaN  |

|        |                                                       |          |      |   |       |       |      |      |      |      |      |      |      |      |      |
|--------|-------------------------------------------------------|----------|------|---|-------|-------|------|------|------|------|------|------|------|------|------|
| Q5S007 | Leucine-rich repeat serine/threonine-protein kinase 2 | LRRK2    | 955  | S | 0.992 | 72.73 | NaN  | NaN  | NaN  | 1.05 | 1.10 | NaN  | NaN  | 1.13 | NaN  |
| Q5SQI0 | Alpha-tubulin N-acetyltransferase 1                   | ATAT1    | 276  | S | 1     | 71.22 | NaN  | NaN  | NaN  | 0.61 | 0.68 | 0.41 | 0.98 | 0.72 | NaN  |
| Q5SRE5 | Nucleoporin NUP188 homolog                            | NUP188   | 1709 | S | 0.966 | 68.49 | 1.39 | 1.37 | NaN  | NaN  | NaN  | NaN  | NaN  | NaN  | NaN  |
| Q5STZ8 | ATP-binding cassette sub-family F member 1            | ABCF1    | 229  | S | 1     | 225.4 | 0.64 | 0.63 | 0.79 | 0.84 | 0.76 | 0.88 | 0.77 | 0.79 | 0.84 |
| Q5STZ8 | ATP-binding cassette sub-family F member 1            | ABCF1    | 106  | S | 1     | 108   | 0.53 | 0.45 | 0.48 | 0.65 | 0.75 | 0.70 | 1.09 | 1.08 | 1.03 |
| Q5STZ8 | ATP-binding cassette sub-family F member 1            | ABCF1    | 110  | S | 1     | 230.7 | 0.77 | 0.91 | 0.76 | 0.88 | 0.94 | 0.89 | 0.57 | 0.50 | 0.59 |
| Q5STZ8 | ATP-binding cassette sub-family F member 1            | ABCF1    | 22   | S | 0.961 | 146.1 | 0.83 | 0.88 | 0.73 | 1.19 | 1.20 | 1.13 | 0.85 | 0.86 | 0.69 |
| Q5T200 | Zinc finger CCCH domain-containing protein 13         | ZC3H13   | 198  | S | 1     | 93.62 | 0.81 | 0.89 | NaN  | 1.05 | 0.95 | NaN  | NaN  | 0.87 | 0.97 |
| Q5T200 | Zinc finger CCCH domain-containing protein 13         | ZC3H13   | 993  | S | 1     | 129.9 | 1.73 | 1.11 | NaN  | 1.33 | 1.38 | NaN  | NaN  | NaN  | NaN  |
| Q5T200 | Zinc finger CCCH domain-containing protein 13         | ZC3H13   | 265  | S | 1     | 78.99 | 0.82 | 0.84 | 0.91 | 0.82 | 0.88 | 1.04 | 0.81 | 0.98 | 0.75 |
| Q5T200 | Zinc finger CCCH domain-containing protein 13         | ZC3H13   | 110  | S | 0.732 | 49.15 | 1.03 | NaN  | 0.91 | NaN  | 1.03 | 0.92 | 1.02 | 0.83 | NaN  |
| Q5T200 | Zinc finger CCCH domain-containing protein 13         | ZC3H13   | 77   | S | 1     | 56.87 | 0.73 | NaN  | NaN  | 0.74 | 0.85 | NaN  | NaN  | NaN  | NaN  |
| Q5T2Z0 | Proline/serine-rich coiled-coil protein 1             | PSRC1    | 189  | S | 0.635 | 56.71 | NaN  | NaN  | 0.71 | 0.67 | NaN  | 0.74 | 0.90 | 1.05 | 0.96 |
| Q5T4S7 | E3 ubiquitin-protein ligase UBR4                      | UBR4     | 619  | S | 0.911 | 124.4 | NaN  | NaN  | NaN  | 1.14 | 1.08 | 1.30 | 1.06 | 1.12 | 0.96 |
| Q5T4S7 | E3 ubiquitin-protein ligase UBR4                      | UBR4     | 620  | S | 0.621 | 124.4 | NaN  | 0.77 | 0.80 | 1.14 | NaN  | 1.66 | 1.20 | 1.12 | 0.96 |
| Q5T4S7 | E3 ubiquitin-protein ligase UBR4                      | UBR4     | 178  | S | 0.978 | 77.24 | 1.25 | 1.35 | 1.67 | 0.48 | NaN  | NaN  | 0.77 | NaN  | NaN  |
| Q5T4S7 | E3 ubiquitin-protein ligase UBR4                      | UBR4     | 2719 | S | 0.983 | 131.5 | 1.02 | NaN  | 0.98 | NaN  | 0.96 | 0.95 | 0.95 | 0.94 | 0.99 |
| Q5T4S7 | E3 ubiquitin-protein ligase UBR4                      | UBR4     | 362  | S | 0.97  | 215.5 | 0.92 | 0.89 | 0.91 | 1.19 | NaN  | 1.27 | 1.08 | NaN  | 1.49 |
| Q5T5P2 | Sickle tail protein homolog                           | KIAA1217 | 1044 | S | 1     | 76.53 | 0.90 | 1.03 | NaN  | 1.43 | 1.44 | NaN  | NaN  | NaN  | NaN  |
| Q5T5U3 | Rho GTPase-activating protein 21                      | ARHGAP21 | 1504 | S | 0.94  | 56.71 | NaN  | 1.00 | 0.77 | 1.07 | NaN  | 0.86 | NaN  | 0.75 | NaN  |
| Q5T5Y3 | Calmodulin-regulated spectrin-associated protein 1    | CAMSAP1  | 563  | S | 1     | 81.43 | NaN  | 1.33 | 1.63 | 1.00 | 1.14 | 1.13 | 1.37 | 1.24 | NaN  |
| Q5TBR0 | Sialic acid synthase                                  | NANS     | 83   | S | 0.994 | 91.32 | 1.04 | 0.77 | 0.81 | 0.91 | 0.77 | 1.17 | 1.14 | 0.95 | 0.98 |
| Q5UIP0 | Telomere-associated protein RIF1                      | RIF1     | 2393 | S | 0.998 | 75.65 | 0.75 | 0.65 | 0.68 | 0.93 | 0.94 | 0.77 | 0.55 | 0.77 | NaN  |
| Q5VSL9 | Striatin-interacting protein 1                        | STRIP1   | 335  | S | 1     | 170.1 | 0.80 | 0.70 | 0.85 | 0.78 | 1.00 | 0.83 | 1.05 | NaN  | 0.98 |

|        |                                                                       |          |      |   |       |       |      |      |      |      |      |      |      |      |      |
|--------|-----------------------------------------------------------------------|----------|------|---|-------|-------|------|------|------|------|------|------|------|------|------|
| Q5VT52 | Regulation of nuclear pre-mRNA domain-containing protein 2            | RPRD2    | 374  | S | 1     | 193   | 0.87 | 1.00 | 1.23 | 1.23 | 1.07 | 1.34 | 0.88 | 0.91 | NaN  |
| Q5VT52 | Regulation of nuclear pre-mRNA domain-containing protein 2            | RPRD2    | 485  | S | 0.632 | 103.1 | 1.03 | 0.94 | NaN  | 1.11 | NaN  | NaN  | 0.99 | NaN  | NaN  |
| Q5VTR2 | E3 ubiquitin-protein ligase BRE1A                                     | RNF20    | 138  | S | 0.969 | 97.9  | NaN  | NaN  | NaN  | NaN  | NaN  | NaN  | 1.42 | 1.64 | 1.10 |
| Q5VUA4 | Zinc finger protein 318                                               | ZNF318   | 173  | S | 1     | 73.77 | 0.61 | 0.59 | NaN  | 0.71 | 0.72 | NaN  | NaN  | 0.57 | NaN  |
| Q5VUB5 | Protein FAM171A1                                                      | FAM171A1 | 849  | S | 0.999 | 51.69 | NaN  | NaN  | NaN  | 1.25 | 0.99 | 2.28 | NaN  | 0.90 | 1.57 |
| Q5VWV2 | Partitioning defective 3                                              | PARD3    | 792  | S | 1     | 47.62 | 0.69 | NaN  | NaN  | NaN  | NaN  | NaN  | 0.72 | 0.68 | 0.64 |
| Q5VWV2 | Partitioning defective 3                                              | PARD3    | 635  | S | 0.557 | 67.25 | 0.89 | 1.25 | NaN  | NaN  | 1.38 | NaN  | NaN  | 1.09 | 1.13 |
| Q5VWV2 | Partitioning defective 3                                              | PARD3    | 638  | S | 0.526 | 58.95 | 0.89 | 1.25 | NaN  | NaN  | NaN  | NaN  | 1.03 | NaN  | 1.13 |
| Q5VY60 | HAUS augmin-like complex subunit 6                                    | HAUS6    | 416  | S | 0.997 | 106.4 | NaN  | NaN  | 1.28 | NaN  | 1.56 | 2.65 | 1.08 | 1.51 | 0.96 |
| Q5VZ89 | DENN domain-containing protein 4C                                     | DENND4C  | 1125 | S | 0.5   | 135.9 | 0.59 | 0.68 | 0.90 | 0.69 | NaN  | NaN  | NaN  | NaN  | NaN  |
| Q5VZ89 | DENN domain-containing protein 4C                                     | DENND4C  | 1126 | S | 0.5   | 135.9 | 0.59 | 0.68 | 0.90 | 0.69 | NaN  | NaN  | NaN  | NaN  | NaN  |
| Q5VZL5 | Zinc finger MYM-type protein 4                                        | ZMYM4    | 122  | S | 0.993 | 135.3 | 0.18 | NaN  | NaN  | NaN  | 0.54 | 0.66 | 0.89 | NaN  | 1.49 |
| Q63ZY6 | Putative methyltransferase NSUN5C                                     | NSUN5P2  | 260  | S | 0.999 | 42.63 | NaN  | NaN  | 0.59 | NaN  | 1.12 | 0.72 | NaN  | NaN  | 0.60 |
| Q66K14 | TBC1 domain family member 9B                                          | TBC1D9B  | 435  | S | 0.956 | 128.2 | 1.04 | 0.92 | 0.92 | 1.06 | 0.65 | 1.14 | 1.26 | 1.17 | 1.43 |
| Q66K14 | TBC1 domain family member 9B                                          | TBC1D9B  | 994  | S | 0.693 | 66.96 | NaN  | NaN  | 1.06 | NaN  | 1.21 | NaN  | 0.86 | 0.88 | NaN  |
| Q66K74 | Microtubule-associated protein 1S;MAP1S heavy chain:MAP1S light chain | MAP1S    | 631  | S | 0.567 | 97.06 | NaN  | NaN  | NaN  | 0.82 | 0.62 | NaN  | NaN  | NaN  | NaN  |
| Q66K74 | Microtubule-associated protein 1S;MAP1S heavy chain:MAP1S light chain | MAP1S    | 632  | S | 0.7   | 162   | NaN  | NaN  | NaN  | 0.84 | 0.62 | NaN  | 1.15 | NaN  | NaN  |
| Q66K74 | Microtubule-associated protein 1S;MAP1S heavy chain:MAP1S light chain | MAP1S    | 640  | S | 0.997 | 176   | 0.94 | 0.94 | 0.91 | 0.86 | 0.93 | 0.87 | 1.08 | 1.04 | 1.08 |
| Q66K74 | Microtubule-associated protein 1S;MAP1S heavy chain:MAP1S light chain | MAP1S    | 643  | S | 0.511 | 54.98 | NaN  | NaN  | NaN  | 0.99 | 0.56 | NaN  | NaN  | NaN  | NaN  |
| Q66K74 | Microtubule-associated protein 1S;MAP1S heavy chain:MAP1S light chain | MAP1S    | 759  | S | 1     | 237.3 | 0.56 | 0.59 | 0.62 | 0.87 | 0.83 | 0.84 | 0.66 | 0.68 | 0.69 |
| Q66K74 | Microtubule-associated protein 1S;MAP1S heavy chain:MAP1S light chain | MAP1S    | 592  | S | 0.899 | 64.38 | 0.60 | NaN  | 0.41 | 0.98 | NaN  | 0.71 | 1.06 | NaN  | 0.93 |

|        |                                                                             |              |      |   |       |       |      |      |      |      |      |      |      |      |      |
|--------|-----------------------------------------------------------------------------|--------------|------|---|-------|-------|------|------|------|------|------|------|------|------|------|
| Q66K74 | Microtubule-associated protein<br>1S;MAP1S heavy<br>chain:MAP1S light chain | MAP1S        | 582  | S | 0.986 | 66.08 | NaN  | NaN  | 0.55 | 0.77 | NaN  | 0.85 | 0.89 | 0.86 | NaN  |
| Q66K74 | Microtubule-associated protein<br>1S;MAP1S heavy<br>chain:MAP1S light chain | MAP1S        | 731  | S | 0.845 | 111.7 | 1.33 | 1.15 | NaN  | NaN  | NaN  | NaN  | 1.19 | 1.35 | NaN  |
| Q68CZ2 | Tensin-3                                                                    | TNS3         | 1154 | S | 1     | 65.74 | 0.65 | 0.90 | NaN  | NaN  | 1.25 | 1.21 | 0.55 | 0.80 | 0.71 |
| Q68CZ2 | Tensin-3                                                                    | TNS3         | 690  | S | 0.937 | 169.8 | 0.85 | NaN  | NaN  | 0.92 | 0.97 | 0.87 | NaN  | NaN  | NaN  |
| Q68CZ2 | Tensin-3                                                                    | TNS3         | 660  | S | 0.995 | 148.3 | 0.74 | 0.84 | 0.81 | 1.20 | 1.32 | 1.44 | 0.62 | 0.57 | 0.58 |
| Q68CZ2 | Tensin-3                                                                    | TNS3         | 776  | S | 0.972 | 60.1  | 1.11 | 0.87 | NaN  | NaN  | 1.60 | NaN  | NaN  | NaN  | NaN  |
| Q68CZ2 | Tensin-3                                                                    | TNS3         | 1441 | S | 1     | 64.71 | 0.46 | 0.41 | 0.47 | 0.90 | NaN  | 0.70 | 0.61 | 0.52 | NaN  |
| Q68DQ2 | Very large A-kinase anchor<br>protein                                       | CRYBG3       | 1280 | S | 0.97  | 65.11 | 1.03 | 0.89 | NaN  | NaN  | NaN  | NaN  | NaN  | NaN  | NaN  |
| Q68E01 | Integrator complex subunit 3                                                | INTS3        | 502  | S | 0.999 | 65.65 | NaN  | NaN  | NaN  | 0.72 | NaN  | NaN  | 0.95 | 0.93 | NaN  |
| Q68EM7 | Rho GTPase-activating<br>protein 17                                         | ARHGAP<br>17 | 575  | S | 1     | 208.1 | 0.57 | 0.62 | NaN  | 0.71 | 0.75 | 0.90 | NaN  | NaN  | 0.79 |
| Q68EM7 | Rho GTPase-activating<br>protein 17                                         | ARHGAP<br>17 | 676  | S | 0.997 | 188.3 | 0.85 | 0.90 | 0.96 | 0.89 | 0.96 | 0.87 | 1.00 | 1.05 | 1.09 |
| Q69YN4 | Protein virilizer homolog                                                   | KIAA1429     | 133  | S | 0.544 | 67.31 | 1.03 | 0.95 | 1.01 | 0.95 | NaN  | NaN  | NaN  | NaN  | NaN  |
| Q69YN4 | Protein virilizer homolog                                                   | KIAA1429     | 138  | S | 0.883 | 105.4 | 1.03 | 0.95 | NaN  | 0.95 | 1.06 | NaN  | 0.96 | 0.89 | 1.04 |
| Q6GQQ9 | OTU domain-containing<br>protein 7B                                         | OTUD7B       | 464  | S | 0.998 | 84.74 | 1.23 | 1.35 | NaN  | 1.32 | 1.77 | NaN  | NaN  | 1.55 | NaN  |
| Q6GQQ9 | OTU domain-containing<br>protein 7B                                         | OTUD7B       | 467  | S | 0.999 | 84.74 | 2.15 | 1.35 | NaN  | 1.32 | 1.77 | NaN  | NaN  | 1.55 | NaN  |
| Q6IQ49 | Protein SDE2 homolog                                                        | SDE2         | 278  | S | 0.651 | 90.13 | 1.27 | 1.08 | NaN  | 1.15 | NaN  | 0.92 | 0.97 | 0.99 | NaN  |
| Q6KC79 | Nipped-B-like protein                                                       | NIPBL        | 350  | S | 0.627 | 124.7 | 1.07 | 0.83 | 1.24 | 1.99 | 2.13 | NaN  | 0.84 | NaN  | NaN  |
| Q6KC79 | Nipped-B-like protein                                                       | NIPBL        | 2658 | S | 1     | 165.6 | 0.74 | 0.72 | 0.75 | 0.74 | 0.86 | 0.81 | 0.85 | 0.94 | 0.84 |
| Q6KC79 | Nipped-B-like protein                                                       | NIPBL        | 318  | S | 1     | 59.59 | 0.85 | 0.96 | NaN  | 0.86 | 0.80 | NaN  | 0.82 | 0.73 | NaN  |
| Q6NZI2 | Polymerase I and transcript<br>release factor                               | PTRF         | 202  | S | 1     | 183.7 | 1.10 | 1.07 | 1.08 | NaN  | 0.98 | 1.04 | 1.19 | NaN  | NaN  |
| Q6NZI2 | Polymerase I and transcript<br>release factor                               | PTRF         | 203  | S | 1     | 183.7 | 1.10 | 1.07 | 1.08 | NaN  | 0.98 | 1.04 | 1.19 | NaN  | NaN  |
| Q6NZI2 | Polymerase I and transcript<br>release factor                               | PTRF         | 365  | S | 1     | 200   | 1.38 | 1.31 | 1.18 | 0.95 | 0.83 | 1.04 | 1.00 | 0.86 | 0.96 |
| Q6NZI2 | Polymerase I and transcript<br>release factor                               | PTRF         | 366  | S | 1     | 200   | 1.38 | 1.35 | 1.18 | 0.95 | 1.00 | 1.04 | 1.00 | 1.03 | 0.96 |
| Q6NZI2 | Polymerase I and transcript<br>release factor                               | PTRF         | 379  | S | 0.991 | 173   | 0.76 | 0.69 | NaN  | 0.58 | NaN  | NaN  | 0.74 | 0.72 | NaN  |
| Q6NZI2 | Polymerase I and transcript<br>release factor                               | PTRF         | 387  | S | 1     | 200   | 0.63 | 0.55 | 0.60 | 0.61 | 0.57 | 0.68 | 0.67 | 0.87 | 1.05 |
| Q6NZI2 | Polymerase I and transcript<br>release factor                               | PTRF         | 389  | S | 1     | 200   | 0.63 | 0.55 | 0.60 | 0.61 | 0.57 | 0.68 | 0.67 | 0.87 | 1.05 |
| Q6P2E9 | Enhancer of mRNA-decapping<br>protein 4                                     | EDC4         | 879  | S | 0.998 | 161   | 1.47 | 1.67 | 1.01 | 1.02 | NaN  | 0.86 | 1.45 | NaN  | NaN  |
| Q6P2E9 | Enhancer of mRNA-decapping<br>protein 4                                     | EDC4         | 723  | S | 0.981 | 139   | 1.49 | NaN  | 0.85 | NaN  | 1.93 | 1.55 | 1.19 | 1.40 | 1.51 |
| Q6P597 | Kinesin light chain 3                                                       | KLC3         | 502  | S | 0.994 | 94.51 | 1.04 | 0.91 | NaN  | NaN  | NaN  | 1.04 | NaN  | 1.07 | NaN  |

|        |                                                         |          |     |   |       |       |      |      |      |      |      |      |      |      |      |      |
|--------|---------------------------------------------------------|----------|-----|---|-------|-------|------|------|------|------|------|------|------|------|------|------|
| Q6PD62 | RNA polymerase-associated protein CTR9 homolog          | CTR9     | 970 | S | 1     | 313.9 | 0.62 | 0.57 | 0.63 | 0.58 | 0.62 | NaN  | 0.69 | 0.91 | 0.74 |      |
| Q6PKG0 | La-related protein 1                                    | LARP1    | 90  | S | 1     | 99.79 | NaN  | NaN  | 1.09 | NaN  | 0.92 | NaN  | NaN  | 1.05 | 0.52 |      |
| Q6PKG0 | La-related protein 1                                    | LARP1    | 521 | S | 1     | 157   | 1.18 | 1.14 | 1.12 | 1.08 | 1.11 | 1.09 | 1.04 | 1.03 | 1.09 |      |
| Q6PKG0 | La-related protein 1                                    | LARP1    | 546 | S | 0.5   | 209.6 | 3.14 | 3.44 | NaN  | NaN  | NaN  | 2.28 | 2.55 | NaN  | NaN  |      |
| Q6PKG0 | La-related protein 1                                    | LARP1    | 548 | S | 1     | 276   | 3.36 | 3.44 | NaN  | 3.76 | 3.04 | 2.28 | 2.55 | NaN  | NaN  |      |
| Q6PKG0 | La-related protein 1                                    | LARP1    | 627 | S | 0.983 | 78.92 | NaN  | NaN  | NaN  | NaN  | NaN  | NaN  | 2.14 | 2.38 | NaN  |      |
| Q6PKG0 | La-related protein 1                                    | LARP1    | 143 | S | 0.99  | 90.3  | 0.87 | NaN  | NaN  | 1.01 | 0.93 | NaN  | 0.93 | 0.81 | 0.79 | 0.86 |
| Q6PKG0 | La-related protein 1                                    | LARP1    | 774 | S | 1     | 109.1 | NaN  | NaN  | 2.66 | 2.32 | 2.39 | 2.48 | 2.23 | 2.17 | 2.48 |      |
| Q6PKG0 | La-related protein 1                                    | LARP1    | 851 | S | 0.744 | 162.8 | NaN  | NaN  | NaN  | 0.93 | 0.79 | NaN  | NaN  | NaN  | NaN  |      |
| Q6QNY0 | Biogenesis of lysosome-related organelles complex 1     | BLOC1S3  | 65  | S | 1     | 128.9 | 1.15 | 1.16 | 1.25 | 1.09 | 1.11 | NaN  | 1.09 | 1.11 | 1.16 |      |
| Q6SPF0 | Atherin                                                 | SAMD1    | 161 | S | 0.993 | 67.36 | NaN  | 0.75 | 1.66 | 1.55 | 1.17 | NaN  | 2.09 | 2.13 | NaN  |      |
| Q6UN15 | Pre-mRNA 3'-end-processing factor FIP1                  | FIP1L1   | 259 | S | 0.976 | 108.7 | 1.29 | 1.31 | 1.21 | 1.96 | 2.09 | 1.88 | NaN  | NaN  | 0.91 |      |
| Q6UN15 | Pre-mRNA 3'-end-processing factor FIP1                  | FIP1L1   | 304 | S | 1     | 75.04 | NaN  | NaN  | NaN  | NaN  | NaN  | NaN  | 3.28 | NaN  | 3.83 |      |
| Q6UN15 | Pre-mRNA 3'-end-processing factor FIP1                  | FIP1L1   | 492 | S | 1     | 128   | 0.89 | 0.94 | 0.93 | 0.92 | 0.86 | 0.90 | 1.03 | 1.01 | 0.96 |      |
| Q6UN15 | Pre-mRNA 3'-end-processing factor FIP1                  | FIP1L1   | 500 | S | 0.999 | 128   | 1.21 | 1.10 | 1.49 | 0.85 | 1.00 | 1.24 | 1.12 | 1.06 | 1.03 |      |
| Q6VMQ6 | Activating transcription factor 7-interacting protein 1 | ATF7IP   | 557 | S | 0.5   | 41.3  | NaN  | NaN  | NaN  | NaN  | 0.96 | 1.12 | 0.91 | 0.88 | NaN  |      |
| Q6VMQ6 | Activating transcription factor 7-interacting protein 1 | ATF7IP   | 559 | S | 0.976 | 67.1  | 0.43 | NaN  | NaN  | 0.81 | 0.85 | 1.12 | 0.91 | 0.75 | 0.79 |      |
| Q6VY07 | Phosphofurin acidic cluster sorting protein 1           | PACS1    | 495 | S | 0.917 | 112.6 | 2.53 | 2.16 | 1.71 | NaN  | NaN  | NaN  | 1.38 | NaN  | 1.50 |      |
| Q6VY07 | Phosphofurin acidic cluster sorting protein 1           | PACS1    | 529 | S | 0.778 | 106.4 | NaN  | NaN  | 1.21 | 1.07 | 1.27 | 0.95 | 2.12 | NaN  | NaN  |      |
| Q6VY07 | Phosphofurin acidic cluster sorting protein 1           | PACS1    | 534 | S | 0.95  | 106.4 | 1.01 | 0.43 | 0.74 | 1.07 | 1.27 | 0.95 | 1.13 | NaN  | 1.73 |      |
| Q6ZRP7 | Sulfhydryl oxidase 2                                    | QSOX2    | 578 | S | 0.854 | 342.2 | 1.01 | 0.95 | 0.78 | 0.88 | 0.78 | 0.87 | 0.99 | 0.80 | 1.06 |      |
| Q6ZTN6 | Ankyrin repeat domain-containing protein 13D            | ANKRD13D | 465 | S | 1     | 66.08 | 0.81 | 0.71 | NaN  | 1.00 | 1.13 | 0.81 | 0.94 | 1.20 | 0.91 |      |
| Q6ZUT6 | Uncharacterized protein C15orf52                        | C15orf52 | 201 | S | 0.943 | 99.81 | NaN  | NaN  | 0.81 | 0.97 | 0.78 | 0.91 | 0.94 | 1.01 | 1.08 |      |
| Q71RC2 | La-related protein 4                                    | LARP4    | 597 | S | 0.718 | 134.5 | 1.72 | 1.93 | NaN  | NaN  | NaN  | NaN  | NaN  | NaN  | NaN  |      |
| Q71RC2 | La-related protein 4                                    | LARP4    | 583 | S | 0.979 | 158.7 | 1.23 | 1.28 | 1.28 | 1.44 | 1.44 | 1.50 | 0.82 | 0.75 | 0.82 |      |
| Q71RC2 | La-related protein 4                                    | LARP4    | 722 | S | 1     | 81.24 | 2.13 | 1.94 | NaN  | NaN  | 1.70 | 1.43 | 0.93 | 1.25 | 1.06 |      |
| Q7KZ85 | Transcription elongation factor SPT6                    | SUPT6H   | 125 | S | 1     | 106   | 0.59 | NaN  | 0.53 | 0.87 | 0.88 | 0.91 | 0.47 | NaN  | 0.72 |      |
| Q7L7X3 | Serine/threonine-protein kinase TAO1                    | TAOK1    | 421 | S | 0.995 | 84.09 | NaN  | 0.97 | NaN  | NaN  | NaN  | NaN  | 1.25 | 1.38 | NaN  |      |
| Q7L8J4 | SH3 domain-binding protein 5-like                       | SH3BP5L  | 30  | S | 1     | 173   | 1.03 | 1.16 | 1.49 | 1.11 | NaN  | 1.21 | 1.26 | 1.52 | NaN  |      |
| Q7LBC6 | Lysine-specific demethylase                             | KDM3B    | 744 | S | 0.964 | 230.4 | NaN  | 0.81 | 0.65 | 0.87 | 0.99 | 0.79 | 0.78 | NaN  | 0.80 |      |

|        |                                                          |         |      |   |       |       |      |      |      |      |      |      |      |      |      |
|--------|----------------------------------------------------------|---------|------|---|-------|-------|------|------|------|------|------|------|------|------|------|
| Q7RTP6 | Protein-methionine sulfoxide oxidase MICAL3              | MICAL3  | 1649 | S | 0.867 | 43.86 | NaN  | NaN  | NaN  | NaN  | NaN  | NaN  | 1.31 | 1.23 | NaN  |
| Q7Z333 | Probable helicase senataxin                              | SETX    | 1017 | S | 1     | 127.3 | NaN  | NaN  | NaN  | NaN  | NaN  | NaN  | 1.12 | 0.95 | NaN  |
| Q7Z333 | Probable helicase senataxin                              | SETX    | 1019 | S | 1     | 127.3 | NaN  | NaN  | NaN  | NaN  | NaN  | NaN  | 1.12 | 0.95 | NaN  |
| Q7Z3C6 | Autophagy-related protein 9A                             | ATG9A   | 18   | S | 0.973 | 117.3 | 0.82 | 1.01 | NaN  | 0.83 | NaN  | NaN  | 0.97 | 0.69 | 1.04 |
| Q7Z3K3 | Pogo transposable element with ZNF domain                | POGZ    | 1338 | S | 0.838 | 63.3  | NaN  | 0.73 | 1.37 | NaN  | NaN  | 1.07 | NaN  | NaN  | NaN  |
| Q7Z3K3 | Pogo transposable element with ZNF domain                | POGZ    | 425  | S | 0.969 | 112.3 | 0.62 | 0.48 | 0.50 | 0.72 | 0.67 | 0.65 | 0.83 | 0.76 | 0.79 |
| Q7Z417 | Nuclear fragile X mental retardation-interacting protein | NUFIP2  | 629  | S | 1     | 276.3 | 2.91 | 2.88 | 3.05 | 2.52 | NaN  | 2.66 | 1.10 | 1.18 | 1.12 |
| Q7Z417 | Nuclear fragile X mental retardation-interacting protein | NUFIP2  | 212  | S | 1     | 253.3 | 2.51 | 3.41 | 3.11 | 2.38 | 2.14 | 2.14 | 1.69 | 1.74 | 1.64 |
| Q7Z417 | Nuclear fragile X mental retardation-interacting protein | NUFIP2  | 652  | S | 1     | 73.88 | 2.39 | 2.73 | 2.83 | 2.18 | 2.13 | NaN  | 0.95 | 0.99 | NaN  |
| Q7Z417 | Nuclear fragile X mental retardation-interacting protein | NUFIP2  | 572  | S | 0.98  | 90.86 | 1.73 | 1.84 | 1.90 | 2.05 | 1.94 | 1.82 | 0.90 | 1.17 | NaN  |
| Q7Z422 | SUZ domain-containing protein 1                          | SZRD1   | 107  | S | 0.997 | 95.52 | 0.66 | 0.63 | 0.67 | 0.70 | 0.70 | 0.72 | 0.89 | 0.81 | 0.82 |
| Q7Z422 | SUZ domain-containing protein 1                          | SZRD1   | 39   | S | 0.997 | 175   | NaN  | 0.67 | NaN  | 0.80 | 0.72 | NaN  | 0.83 | 0.74 | NaN  |
| Q7Z434 | Mitochondrial antiviral-signaling protein                | MAVS    | 152  | S | 0.988 | 124.5 | 1.37 | 0.94 | 1.88 | 2.10 | 1.91 | 1.98 | 0.51 | NaN  | 0.79 |
| Q7Z434 | Mitochondrial antiviral-signaling protein                | MAVS    | 165  | S | 0.989 | 156.9 | 1.47 | 1.08 | 1.33 | 1.51 | 1.44 | 1.43 | 0.66 | 0.69 | 0.77 |
| Q7Z434 | Mitochondrial antiviral-signaling protein                | MAVS    | 222  | S | 0.981 | 106.7 | 2.71 | 2.55 | 2.26 | NaN  | 3.00 | NaN  | 1.63 | NaN  | 1.50 |
| Q7Z460 | CLIP-associating protein 1                               | CLASP1  | 1091 | S | 0.99  | 120.5 | NaN  | 1.41 | 1.51 | 1.31 | 1.77 | 1.63 | 1.19 | 1.26 | 1.65 |
| Q7Z4V5 | Hepatitis-derived growth factor-related protein 2        | HDGFRP2 | 366  | S | 1     | 99.45 | 0.89 | 1.01 | 1.00 | 0.96 | 0.98 | 0.95 | 1.06 | 0.98 | 1.01 |
| Q7Z4V5 | Hepatitis-derived growth factor-related protein 2        | HDGFRP2 | 369  | S | 1     | 99.45 | 0.89 | 1.01 | 1.00 | 0.96 | 0.98 | 0.95 | 1.06 | 0.98 | 1.01 |
| Q7Z4V5 | Hepatitis-derived growth factor-related protein 2        | HDGFRP2 | 370  | S | 1     | 99.45 | 0.89 | 1.01 | 1.00 | 0.96 | 0.98 | 0.95 | 1.06 | 0.98 | 1.01 |
| Q7Z4V5 | Hepatitis-derived growth factor-related protein 2        | HDGFRP2 | 664  | S | 1     | 113.8 | 1.57 | 1.54 | 1.53 | 1.43 | 1.45 | 1.66 | 1.57 | 1.85 | 1.53 |
| Q7Z4V5 | Hepatitis-derived growth factor-related protein 2        | HDGFRP2 | 652  | S | 1     | 67.4  | 1.17 | NaN  | NaN  | 1.33 | 1.15 | NaN  | NaN  | NaN  | NaN  |
| Q7Z4V5 | Hepatitis-derived growth factor-related protein 2        | HDGFRP2 | 230  | S | 0.999 | 54.31 | NaN  | NaN  | 0.45 | 0.66 | 0.67 | 0.64 | NaN  | 0.44 | 0.58 |
| Q7Z4V5 | Hepatitis-derived growth factor-related protein 2        | HDGFRP2 | 232  | S | 0.996 | 72.14 | NaN  | 0.46 | 0.47 | 0.66 | 0.67 | 0.59 | NaN  | 0.44 | 0.58 |
| Q7Z4V5 | Hepatitis-derived growth factor-related protein 2        | HDGFRP2 | 234  | S | 0.982 | 72.14 | NaN  | 0.46 | 0.47 | 0.66 | 0.64 | 0.59 | NaN  | 0.43 | 0.58 |
| Q7Z4V5 | Hepatitis-derived growth factor-related protein 2        | HDGFRP2 | 240  | S | 0.989 | 72.14 | NaN  | 0.46 | 0.47 | 0.66 | 0.67 | 0.59 | NaN  | 0.43 | 0.58 |



|        |                                                  |         |      |   |       |       |      |      |      |      |      |      |      |      |      |
|--------|--------------------------------------------------|---------|------|---|-------|-------|------|------|------|------|------|------|------|------|------|
| Q7Z5K2 | Wings apart-like protein homolog                 | WAPAL   | 221  | S | 0.996 | 91.66 | 0.80 | 1.02 | 0.77 | 0.66 | NaN  | 1.37 | 1.14 | 0.90 | 1.13 |
| Q7Z5K2 | Wings apart-like protein homolog                 | WAPAL   | 223  | S | 0.957 | 77.29 | NaN  | NaN  | NaN  | NaN  | 0.69 | 0.72 | NaN  | NaN  | NaN  |
| Q7Z5K2 | Wings apart-like protein homolog                 | WAPAL   | 77   | S | 0.999 | 164.4 | 1.02 | 1.07 | 1.04 | 0.86 | 0.93 | 1.05 | 0.93 | 1.35 | 0.98 |
| Q7Z5L9 | Interferon regulatory factor 2-binding protein 2 | IRF2BP2 | 360  | S | 1     | 143.6 | 0.52 | 0.49 | 0.58 | 0.50 | 0.42 | 0.50 | 0.83 | 0.94 | 0.96 |
| Q7Z5L9 | Interferon regulatory factor 2-binding protein 2 | IRF2BP2 | 175  | S | 1     | 129.8 | NaN  | 1.38 | NaN  | NaN  | 0.83 | NaN  | 2.33 | 2.26 | 2.69 |
| Q7Z5L9 | Interferon regulatory factor 2-binding protein 2 | IRF2BP2 | 457  | S | 0.969 | 77.36 | 0.49 | 0.47 | NaN  | NaN  | NaN  | 0.40 | 0.56 | 0.64 | 0.80 |
| Q7Z5L9 | Interferon regulatory factor 2-binding protein 2 | IRF2BP2 | 460  | S | 0.959 | 109.1 | 0.49 | 0.47 | NaN  | 0.40 | NaN  | 0.40 | 0.59 | 0.59 | NaN  |
| Q7Z6Z7 | E3 ubiquitin-protein ligase HUWE1                | HUWE1   | 3373 | S | 0.983 | 163.6 | 1.00 | 0.97 | 0.89 | 1.43 | NaN  | 1.41 | 1.34 | NaN  | 1.34 |
| Q7Z6Z7 | E3 ubiquitin-protein ligase HUWE1                | HUWE1   | 1395 | S | 1     | 106.4 | NaN  | NaN  | 1.63 | 1.47 | 1.40 | 1.46 | 1.37 | 1.36 | 1.39 |
| Q7Z6Z7 | E3 ubiquitin-protein ligase HUWE1                | HUWE1   | 2887 | S | 0.872 | 138.3 | NaN  | NaN  | NaN  | 1.25 | 1.60 | NaN  | NaN  | 0.71 | NaN  |
| Q7Z6Z7 | E3 ubiquitin-protein ligase HUWE1                | HUWE1   | 3662 | S | 0.991 | 93.23 | 2.36 | NaN  | 2.00 | 2.60 | 2.76 | 2.21 | 0.98 | 1.00 | 0.89 |
| Q7Z6Z7 | E3 ubiquitin-protein ligase HUWE1                | HUWE1   | 3919 | S | 0.999 | 90.66 | 4.90 | 5.39 | 3.39 | 3.85 | NaN  | 3.60 | 1.76 | NaN  | NaN  |
| Q7Z6Z7 | E3 ubiquitin-protein ligase HUWE1                | HUWE1   | 2362 | S | 1     | 80.47 | 0.38 | 0.44 | NaN  | NaN  | NaN  | NaN  | NaN  | NaN  | NaN  |
| Q7Z6Z7 | E3 ubiquitin-protein ligase HUWE1                | HUWE1   | 1907 | S | 1     | 216.5 | 1.12 | 1.11 | 1.17 | 1.05 | 1.03 | 1.07 | 1.14 | 1.08 | 1.11 |
| Q7Z6Z7 | E3 ubiquitin-protein ligase HUWE1                | HUWE1   | 3816 | S | 0.997 | 153.9 | 0.81 | 0.76 | 0.73 | 1.16 | 1.04 | 1.04 | 0.56 | NaN  | 0.54 |
| Q7Z6Z7 | E3 ubiquitin-protein ligase HUWE1                | HUWE1   | 2918 | S | 0.915 | 120.3 | NaN  | 1.03 | 1.03 | NaN  | 1.35 | 1.40 | 1.02 | 1.08 | 1.23 |
| Q86TB9 | Protein PAT1 homolog 1                           | PATL1   | 179  | S | 0.995 | 97.46 | 1.01 | 1.37 | NaN  | NaN  | NaN  | 0.90 | NaN  | 0.98 | 1.12 |
| Q86TB9 | Protein PAT1 homolog 1                           | PATL1   | 184  | S | 1     | 88.28 | 1.29 | 1.37 | NaN  | NaN  | NaN  | NaN  | NaN  | 1.37 | NaN  |
| Q86U06 | Probable RNA-binding protein 23                  | RBM23   | 149  | S | 1     | 73.57 | 0.84 | NaN  | 0.93 | 1.03 | 1.02 | 0.89 | 0.83 | 0.66 | NaN  |
| Q86U42 | Polyadenylate-binding protein                    | PABPN1  | 95   | S | 0.955 | 73.24 | 1.52 | 1.26 | 1.38 | 1.20 | 1.05 | 1.43 | 1.57 | NaN  | 1.10 |
| Q86U42 | Polyadenylate-binding protein                    | PABPN1  | 150  | S | 1     | 91.66 | 0.70 | 0.81 | 0.76 | 1.31 | 1.75 | 1.17 | NaN  | 0.36 | NaN  |
| Q86U86 | Protein polybromo-1                              | PBRM1   | 10   | S | 0.976 | 129.9 | NaN  | 0.74 | 0.66 | 0.84 | 0.95 | NaN  | 1.01 | 0.92 | NaN  |
| Q86U90 | YrdC domain-containing protein, mitochondrial    | YRDC    | 37   | S | 1     | 60.62 | NaN  | 1.13 | NaN  | 1.04 | 1.00 | NaN  | NaN  | 1.11 | 0.96 |
| Q86UP2 | Kinectin                                         | KTN1    | 75   | S | 0.994 | 97.93 | 2.66 | 1.94 | NaN  | NaN  | 1.92 | NaN  | NaN  | 2.16 | NaN  |
| Q86UU0 | B-cell CLL/lymphoma 9-like protein               | BCL9L   | 21   | S | 1     | 100.2 | 2.49 | NaN  | 2.64 | NaN  | NaN  | 0.65 | NaN  | 0.97 | 1.11 |
| Q86UU0 | B-cell CLL/lymphoma 9-like protein               | BCL9L   | 25   | S | 1     | 64.22 | 2.49 | NaN  | 2.64 | NaN  | NaN  | NaN  | NaN  | NaN  | NaN  |

|        |                                                   |         |      |   |       |       |      |      |      |      |      |      |      |      |      |
|--------|---------------------------------------------------|---------|------|---|-------|-------|------|------|------|------|------|------|------|------|------|
| Q86UU1 | Pleckstrin homology-like domain family B member 1 | PHLDB1  | 518  | S | 0.838 | 97.35 | 3.37 | 2.96 | NaN  | NaN  | NaN  | NaN  | NaN  | NaN  | NaN  |
| Q86UX6 | Serine/threonine-protein kinase 32C               | STK32C  | 18   | S | 0.979 | 112.3 | 0.59 | 0.72 | NaN  | 0.69 | 0.70 | NaN  | 0.78 | 0.94 | NaN  |
| Q86V15 | Zinc finger protein castor homolog 1              | CASZ1   | 1758 | S | 0.959 | 60.1  | 0.28 | NaN  | NaN  | NaN  | NaN  | NaN  | NaN  | 0.43 | 0.84 |
| Q86V48 | Leucine zipper protein 1                          | LUZP1   | 659  | S | 1     | 179.2 | 1.84 | 1.60 | 2.05 | 1.17 | 1.27 | 1.25 | 1.18 | 1.42 | 1.56 |
| Q86V48 | Leucine zipper protein 1                          | LUZP1   | 394  | S | 1     | 63.18 | 1.61 | 1.34 | 1.52 | 1.08 | 1.16 | 1.07 | 1.39 | 1.66 | 1.37 |
| Q86VQ1 | Glucocorticoid-induced transcript 1 protein       | GLCCI1  | 105  | S | 0.983 | 147.5 | NaN  | NaN  | 0.45 | 0.57 | 0.55 | NaN  | 0.82 | 0.87 | NaN  |
| Q86VQ1 | Glucocorticoid-induced transcript 1 protein       | GLCCI1  | 107  | S | 0.693 | 71.42 | NaN  | NaN  | NaN  | NaN  | 0.55 | NaN  | 0.82 | 0.87 | NaN  |
| Q86VQ1 | Glucocorticoid-induced transcript 1 protein       | GLCCI1  | 223  | S | 1     | 86.29 | 0.66 | 0.46 | NaN  | NaN  | NaN  | NaN  | NaN  | NaN  | NaN  |
| Q86VQ1 | Glucocorticoid-induced transcript 1 protein       | GLCCI1  | 303  | S | 1     | 56.77 | NaN  | NaN  | NaN  | 0.62 | NaN  | NaN  | 0.70 | 0.74 | 0.70 |
| Q86W56 | Poly(ADP-ribose) glycohydrolase                   | PARG    | 130  | S | 0.776 | 66.64 | NaN  | NaN  | 1.14 | NaN  | 1.21 | 1.03 | NaN  | 1.03 | NaN  |
| Q86W56 | Poly(ADP-ribose) glycohydrolase                   | PARG    | 137  | S | 0.704 | 57.77 | 0.94 | 1.01 | NaN  | NaN  | NaN  | NaN  | 1.05 | NaN  | 1.17 |
| Q86W56 | Poly(ADP-ribose) glycohydrolase                   | PARG    | 448  | S | 1     | 74.79 | NaN  | 0.75 | NaN  | 0.99 | 0.89 | NaN  | NaN  | NaN  | NaN  |
| Q86W92 | Liprin-beta-1                                     | PPFIBP1 | 466  | S | 0.938 | 51.77 | 1.81 | 1.87 | NaN  | NaN  | NaN  | NaN  | NaN  | NaN  | NaN  |
| Q86WR7 | Proline and serine-rich protein 2                 | PROSER2 | 179  | S | 1     | 99.5  | 1.89 | 2.10 | 2.01 | 0.92 | 0.94 | 0.91 | 1.97 | 2.03 | 1.97 |
| Q86WR7 | Proline and serine-rich protein 2                 | PROSER2 | 212  | S | 0.907 | 94.13 | NaN  | 4.02 | 4.54 | NaN  | 2.82 | NaN  | NaN  | NaN  | NaN  |
| Q86WR7 | Proline and serine-rich protein 2                 | PROSER2 | 43   | S | 0.959 | 86.11 | NaN  | 5.29 | 3.40 | NaN  | NaN  | NaN  | 3.73 | NaN  | NaN  |
| Q86X95 | Corepressor interacting with RBPJ 1               | CIR1    | 202  | S | 1     | 204.9 | 1.33 | 1.50 | 0.83 | 0.99 | 0.92 | 0.80 | 1.13 | 0.95 | 0.98 |
| Q86XP3 | ATP-dependent RNA helicase DDX42                  | DDX42   | 109  | S | 1     | 272.3 | 0.77 | 0.87 | 0.86 | 0.99 | 1.10 | NaN  | NaN  | NaN  | NaN  |
| Q86XP3 | ATP-dependent RNA helicase DDX42                  | DDX42   | 111  | S | 1     | 272.3 | 0.77 | 0.87 | 0.86 | 0.99 | 1.10 | NaN  | NaN  | NaN  | NaN  |
| Q86XP3 | ATP-dependent RNA helicase DDX42                  | DDX42   | 185  | S | 1     | 341.6 | 0.64 | 0.68 | 0.71 | 0.80 | 0.88 | 0.76 | 0.60 | 0.59 | 0.65 |
| Q86YD1 | Prostate tumor-overexpressed gene 1 protein       | PTOV1   | 34   | S | 0.96  | 78.15 | 0.98 | 1.29 | NaN  | NaN  | NaN  | 1.03 | NaN  | NaN  | NaN  |
| Q86YP4 | Transcriptional repressor p66-alpha               | GATAD2A | 100  | S | 1     | 123.4 | 0.70 | 0.64 | 1.30 | 0.74 | 1.13 | NaN  | 0.77 | 0.76 | 1.26 |
| Q86YP4 | Transcriptional repressor p66-alpha               | GATAD2A | 107  | S | 1     | 113.8 | NaN  | 1.17 | 1.17 | 1.12 | 1.13 | NaN  | 1.19 | 1.21 | 1.26 |
| Q86YP4 | Transcriptional repressor p66-alpha               | GATAD2A | 113  | S | 0.668 | 78.66 | NaN  | 0.55 | 1.17 | NaN  | NaN  | NaN  | NaN  | NaN  | NaN  |
| Q86YP4 | Transcriptional repressor p66-alpha               | GATAD2A | 114  | S | 0.952 | 123.4 | NaN  | 1.17 | NaN  | 0.74 | 1.13 | NaN  | 1.19 | 0.74 | 1.26 |

|        |                                                          |              |      |   |       |       |      |      |      |      |      |      |      |      |      |
|--------|----------------------------------------------------------|--------------|------|---|-------|-------|------|------|------|------|------|------|------|------|------|
| Q86YS7 | C2 domain-containing protein Tyrosine-protein kinase     | C2CD5        | 295  | S | 0.851 | 49.36 | NaN  | NaN  | NaN  | 0.94 | 0.65 | NaN  | NaN  | NaN  | NaN  |
| Q86YV5 | SgK223 Tyrosine-protein kinase                           | SGK223       | 263  | S | 1     | 95.11 | NaN  | NaN  | NaN  | 0.88 | NaN  | 0.64 | 0.62 | NaN  | NaN  |
| Q86YV5 | SgK223 Tyrosine-protein kinase                           | SGK223       | 148  | S | 0.874 | 112.9 | 0.54 | 0.81 | NaN  | 1.21 | 1.05 | 1.11 | NaN  | NaN  | 0.45 |
| Q8IU81 | Interferon regulatory factor 2-binding protein 1         | IRF2BP1      | 384  | S | 1     | 105.2 | 0.84 | 0.59 | 0.84 | 0.86 | 0.84 | 0.83 | 0.91 | 0.94 | 0.91 |
| Q8IVF2 | Protein AHNAK2                                           | AHNAK2       | 294  | S | 0.883 | 125.1 | NaN  | 1.40 | 1.30 | 2.21 | NaN  | NaN  | 1.51 | 1.71 | 3.12 |
| Q8IVF2 | Protein AHNAK2                                           | AHNAK2       | 5175 | S | 1     | 96.02 | NaN  | 0.53 | NaN  | 0.43 | 0.63 | NaN  | 0.80 | 0.83 | NaN  |
| Q8IWE2 | Protein NOXP20                                           | FAM114A<br>1 | 196  | S | 0.972 | 76.2  | 1.09 | NaN  | 1.25 | NaN  | NaN  | NaN  | 1.98 | NaN  | NaN  |
| Q8IWE2 | Protein NOXP20                                           | FAM114A<br>1 | 120  | S | 0.991 | 94.8  | 0.80 | NaN  | NaN  | 1.16 | 1.18 | NaN  | NaN  | NaN  | NaN  |
| Q8IWZ3 | Ankyrin repeat and KH domain-containing protein 1        | ANKHD1       | 93   | S | 0.925 | 154.4 | 0.83 | 0.70 | NaN  | 0.68 | 0.86 | 1.13 | 0.87 | 0.71 | 0.59 |
| Q8IWZ3 | Ankyrin repeat and KH domain-containing protein 1        | ANKHD1       | 95   | S | 0.994 | 154.4 | 0.83 | 0.70 | NaN  | 0.68 | 0.81 | 1.13 | 0.87 | 0.71 | 0.59 |
| Q8IY81 | pre-rRNA processing protein FTSJ3                        | FTSJ3        | 335  | S | 1     | 219.2 | 1.15 | 1.12 | 1.14 | NaN  | 0.66 | 0.92 | 1.30 | 1.04 | 1.15 |
| Q8IY81 | pre-rRNA processing protein FTSJ3                        | FTSJ3        | 336  | S | 1     | 219.2 | 1.15 | 1.12 | 1.14 | NaN  | 0.66 | 0.92 | 1.30 | 1.04 | 1.15 |
| Q8N1G2 | Cap-specific mRNA (nucleoside-2'-O-)-methyltransferase 1 | CMTR1        | 49   | S | 0.895 | 100.6 | NaN  | NaN  | 0.55 | 0.61 | NaN  | 0.52 | 0.43 | 0.50 | 0.68 |
| Q8N1G2 | Cap-specific mRNA (nucleoside-2'-O-)-methyltransferase 1 | CMTR1        | 51   | S | 0.988 | 133.3 | NaN  | 0.98 | 0.59 | 0.38 | NaN  | 0.69 | 0.75 | 0.50 | 0.88 |
| Q8N1G2 | Cap-specific mRNA (nucleoside-2'-O-)-methyltransferase 1 | CMTR1        | 53   | S | 0.981 | 192.4 | 0.32 | 0.98 | 0.45 | 0.34 | NaN  | 0.39 | 0.75 | 0.56 | 0.55 |
| Q8N1G4 | Leucine-rich repeat-containing protein 47                | LRRC47       | 520  | S | 0.942 | 151.7 | 0.83 | 0.86 | 0.68 | 0.89 | NaN  | 0.89 | 1.06 | NaN  | 1.13 |
| Q8N392 | Rho GTPase-activating protein 18                         | ARHGAP<br>18 | 64   | S | 0.692 | 145.2 | NaN  | NaN  | NaN  | NaN  | NaN  | NaN  | NaN  | 1.08 | 1.57 |
| Q8N392 | Rho GTPase-activating protein 18                         | ARHGAP<br>18 | 66   | S | 0.761 | 145.2 | 1.87 | 2.14 | NaN  | 2.36 | NaN  | NaN  | 1.38 | 1.08 | 1.57 |
| Q8N392 | Rho GTPase-activating protein 18                         | ARHGAP<br>18 | 69   | S | 0.986 | 133.4 | 1.87 | 2.14 | NaN  | 2.36 | NaN  | NaN  | 1.38 | 1.08 | 1.57 |
| Q8N3D4 | EH domain-binding protein 1-like protein 1               | EHBP1L1      | 285  | S | 0.5   | 152.3 | NaN  | NaN  | 0.98 | 1.15 | 1.13 | 1.03 | 0.96 | 0.83 | 0.82 |
| Q8N3D4 | EH domain-binding protein 1-like protein 1               | EHBP1L1      | 964  | S | 1     | 65.8  | NaN  | 0.75 | NaN  | 1.14 | 1.04 | 0.99 | 1.00 | 0.89 | 0.96 |
| Q8N3F8 | MICAL-like protein 1                                     | MICAL1       | 621  | S | 0.908 | 77.63 | NaN  | 1.23 | NaN  | 0.86 | 1.16 | NaN  | 1.27 | 1.06 | 1.28 |
| Q8N3V7 | Synaptopodin                                             | SYNPO        | 833  | S | 0.998 | 106.4 | 0.98 | 0.96 | NaN  | 0.78 | 1.08 | NaN  | 1.45 | 1.32 | NaN  |
| Q8N3V7 | Synaptopodin                                             | SYNPO        | 685  | S | 1     | 65.18 | 0.95 | 0.86 | NaN  | 0.70 | NaN  | NaN  | 1.30 | 1.53 | NaN  |
| Q8N3X1 | Formin-binding protein 4                                 | FNBP4        | 116  | S | 0.927 | 51.46 | NaN  | NaN  | NaN  | 0.98 | 0.98 | NaN  | 1.35 | 1.28 | NaN  |
| Q8N3X1 | Formin-binding protein 4                                 | FNBP4        | 18   | S | 1     | 54.86 | 0.99 | NaN  | 1.02 | NaN  | 1.11 | 1.12 | 1.13 | 1.15 | 0.98 |

|        |                                            |         |      |   |       |       |      |      |      |      |      |       |      |      |      |      |
|--------|--------------------------------------------|---------|------|---|-------|-------|------|------|------|------|------|-------|------|------|------|------|
| Q8N4X5 | Actin filament-associated protein 1-like 2 | AFAP1L2 | 640  | S | 0.999 | 66.91 | NaN  | NaN  | NaN  | 0.59 | NaN  | NaN   | 1.30 | 1.31 | 1.79 |      |
| Q8N4X5 | Actin filament-associated protein 1-like 2 | AFAP1L2 | 414  | S | 0.62  | 107.2 | 0.43 | NaN  | NaN  | NaN  | 0.64 | NaN   | 1.87 | 1.26 | NaN  |      |
| Q8N556 | Actin filament-associated protein 1        | AFAP1   | 264  | S | 0.594 | 167.1 | NaN  | NaN  | 1.42 | NaN  | 1.36 | 1.59  | 0.87 | NaN  | 0.96 |      |
| Q8N556 | Actin filament-associated protein 1        | AFAP1   | 265  | S | 0.876 | 167.1 | 1.35 | 1.43 | NaN  | 1.34 | 1.36 | NaN   | NaN  | 0.96 | NaN  |      |
| Q8N556 | Actin filament-associated protein 1        | AFAP1   | 665  | S | 0.978 | 101.4 | 0.20 | 1.50 | 1.12 | 1.38 | NaN  | NaN   | 1.11 | NaN  | NaN  |      |
| Q8N556 | Actin filament-associated protein 1        | AFAP1   | 668  | S | 1     | 133   | 1.47 | 1.93 | 2.05 | 1.38 | 1.48 | 1.47  | 1.79 | NaN  | 1.65 |      |
| Q8N556 | Actin filament-associated protein 1        | AFAP1   | 679  | S | 0.919 | 111.4 | NaN  | NaN  | NaN  | 0.47 | 0.43 | NaN   | NaN  | NaN  | NaN  |      |
| Q8N6N3 | UPF0690 protein C1orf52                    | C1orf52 | 158  | S | 1     | 261.5 | 1.22 | 1.26 | 1.18 | 1.14 | 1.16 | 1.14  | 1.00 | 0.89 | 0.97 |      |
| Q8N8A6 | ATP-dependent RNA helicase DDX51           | DDX51   | 83   | S | 1     | 125.4 | 0.60 | 0.63 | 0.71 | 0.74 | 0.64 | 0.61  | 0.85 | 0.84 | 0.93 |      |
| Q8N9M5 | Transmembrane protein 102                  | TMEM102 | 246  | S | 1     | 52.73 | NaN  | NaN  | 2.37 | 1.92 | 2.04 | NaN   | 1.12 | 1.25 | 1.74 |      |
| Q8NAV1 | Pre-mRNA-splicing factor 38A               | PRPF38A | 209  | S | 1     | 78.15 | 1.00 | 1.00 | NaN  | NaN  | 0.96 | NaN   | NaN  | 1.12 | NaN  |      |
| Q8NBN3 | Transmembrane protein 87A                  | TMEM87A | 540  | S | 1     | 145.1 | 1.37 | 1.62 | 1.11 | 1.17 | 1.38 | 0.87  | 1.11 | 0.84 | 1.28 |      |
| Q8NC44 | Protein FAM134A                            | FAM134A | 281  | S | 0.966 | 118.3 | NaN  | 0.99 | 0.95 | NaN  | 2.01 | 1.01  | 1.32 | NaN  | 1.65 |      |
| Q8NC44 | Protein FAM134A                            | FAM134A | 283  | S | 0.769 | 118.3 | NaN  | NaN  | 0.95 | NaN  | NaN  | NaN   | NaN  | 1.34 | 1.65 |      |
| Q8NC44 | Protein FAM134A                            | FAM134A | 385  | S | 1     | 266.4 | 1.20 | 1.15 | 1.15 | 1.28 | 2.06 | 1.23  | 1.18 | 1.18 | 1.17 |      |
| Q8NC56 | LEM domain-containing protein 2            | LEMD2   | 134  | S | 1     | 81.64 | NaN  | 2.20 | NaN  | NaN  | 1.86 | 10.75 | NaN  | 2.41 | NaN  |      |
| Q8NC56 | LEM domain-containing protein 2            | LEMD2   | 138  | S | 1     | 131.1 | 0.81 | 0.83 | 0.87 | 0.81 | 0.90 | 0.84  | 0.64 | 0.68 | 0.71 |      |
| Q8NC56 | LEM domain-containing protein 2            | LEMD2   | 139  | S | 1     | 81.64 | 0.86 | 0.88 | 0.82 | 0.81 | 0.90 | 0.82  | 0.64 | 0.68 | 0.71 |      |
| Q8ND56 | Protein LSM14 homolog A                    | LSM14A  | 216  | S | 1     | 56.6  | 1.17 | 1.12 | 1.23 | 1.09 | 1.13 | 1.06  | NaN  | 1.02 | 1.08 |      |
| Q8ND56 | Protein LSM14 homolog A                    | LSM14A  | 192  | S | 0.986 | 116.1 | 1.24 | NaN  | 1.25 | 1.28 | 1.24 | 1.21  | 0.91 | 0.94 | 0.85 |      |
| Q8ND56 | Protein LSM14 homolog A                    | LSM14A  | 182  | S | 0.896 | 110   | 1.38 | 1.30 | NaN  | 1.09 | NaN  | 1.25  | 1.26 | NaN  | 1.37 |      |
| Q8ND56 | Protein LSM14 homolog A                    | LSM14A  | 183  | S | 0.942 | 116.8 | 1.16 | 1.23 | 1.33 | 1.25 | 1.10 | 1.12  | 1.47 | 1.18 | 1.45 |      |
| Q8ND76 | Cyclin-Y                                   | CCNY    | 326  | S | 1     | 149.7 | 1.59 | 1.20 | 1.43 | 1.18 | 0.96 | 1.13  | 1.70 | 1.92 | 1.68 |      |
| Q8NDI1 | EH domain-binding protein 1                | EHBP1   | 428  | S | 0.874 | 130.1 | 0.58 | 0.63 | 0.59 | 1.59 | 0.87 | 0.52  | 0.43 | 2.00 | 0.56 |      |
| Q8NDI1 | EH domain-binding protein 1                | EHBP1   | 432  | S | 1     | 101.5 | 1.84 | 1.85 | 2.00 | 1.59 | 1.62 | 1.64  | 2.14 | 2.00 | 2.11 |      |
| Q8NDI1 | EH domain-binding protein 1                | EHBP1   | 436  | S | 1     | 130.1 | 0.91 | 0.82 | 0.92 | 0.84 | 0.87 | 0.92  | 0.91 | 0.80 | 0.87 |      |
| Q8NDI1 | EH domain-binding protein 1                | EHBP1   | 335  | S | 0.953 | 244.9 | 0.70 | 0.92 | 0.91 | 0.98 | 0.86 | 0.96  | 1.13 | NaN  | 0.93 |      |
| Q8NDI1 | EH domain-binding protein 1                | EHBP1   | 1058 | S | 1     | 98.9  | NaN  | 0.80 | 1.06 | 1.67 | 1.36 | 1.19  | 1.81 | 1.65 | 1.06 |      |
| Q8NDI1 | EH domain-binding protein 1                | EHBP1   | 751  | S | 1     | 67.93 | 1.21 | 1.17 | 1.28 | 1.28 | 1.26 | 1.28  | 1.05 | 1.02 | 1.05 |      |
| Q8NDI1 | EH domain-binding protein 1                | EHBP1   | 759  | S | 0.962 | 58.7  | NaN  | NaN  | 2.16 | 2.11 | 2.35 | 2.04  | 0.93 | 1.00 | NaN  |      |
| Q8NDX6 | Zinc finger protein 740                    | ZNF740  | 44   | S | 1     | 57.53 | NaN  | NaN  | NaN  | NaN  | NaN  | NaN   | NaN  | 0.91 | 1.00 | 0.89 |
| Q8NE01 | Metal transporter CNNM3                    | CNNM3   | 700  | S | 0.983 | 77.49 | 1.39 | 1.20 | NaN  | NaN  | NaN  | NaN   | NaN  | NaN  | NaN  |      |
| Q8NEF9 | Serum response factor-binding protein 1    | SRFBP1  | 203  | S | 0.956 | 85.36 | 1.68 | NaN  | 1.62 | NaN  | 1.56 | NaN   | 1.21 | 0.82 | NaN  |      |

|        |                                                                              |         |      |   |       |       |      |      |      |      |      |      |      |      |      |
|--------|------------------------------------------------------------------------------|---------|------|---|-------|-------|------|------|------|------|------|------|------|------|------|
| Q8NFC6 | Biorientation of chromosomes in cell division protein 1-like 1               | BOD1L1  | 3029 | S | 1     | 64.19 | NaN  | 0.79 | 0.93 | 0.83 | 0.89 | 0.91 | 1.13 | NaN  | NaN  |
| Q8NFC6 | Biorientation of chromosomes in cell division protein 1-like 1               | BOD1L1  | 2986 | S | 1     | 274.6 | 0.68 | 0.79 | 0.86 | NaN  | NaN  | 0.72 | 0.52 | 0.92 | 0.77 |
| Q8NFJ5 | Retinoic acid-induced protein E3 ubiquitin-protein ligase                    | GPRC5A  | 345  | S | 1     | 79.39 | 0.78 | NaN  | NaN  | 0.61 | 0.68 | NaN  | NaN  | NaN  | NaN  |
| Q8NHG8 | ZNRF2                                                                        | ZNRF2   | 135  | S | 1     | 50.11 | 1.27 | 1.17 | NaN  | NaN  | NaN  | NaN  | NaN  | NaN  | NaN  |
| Q8NHV4 | Protein NEDD1                                                                | NEDD1   | 516  | S | 0.99  | 93.22 | 0.67 | 0.53 | NaN  | NaN  | 0.70 | NaN  | NaN  | 1.01 | 1.39 |
| Q8NI08 | Nuclear receptor coactivator 7                                               | NCOA7   | 211  | S | 0.82  | 130.5 | NaN  | 0.94 | 0.67 | NaN  | NaN  | NaN  | NaN  | 1.10 | 0.90 |
| Q8TAD8 | Smad nuclear-interacting protein 1                                           | SNIP1   | 35   | S | 1     | 103   | 0.90 | NaN  | 1.15 | 0.93 | 0.95 | 0.88 | 1.02 | 0.99 | 1.01 |
| Q8TAP8 | Protein phosphatase 1 regulatory subunit 35                                  | PPP1R35 | 52   | S | 0.98  | 82.34 | NaN  | 2.04 | 1.85 | 1.40 | 1.27 | NaN  | 1.56 | 1.51 | NaN  |
| Q8TB61 | Adenosine 3'-phospho 5'-phosphosulfate transporter 1                         | SLC35B2 | 427  | S | 1     | 103   | 1.64 | 1.30 | 1.36 | 3.49 | 2.27 | 2.02 | 0.83 | 0.99 | 0.80 |
| Q8TCJ2 | Dolichyl-diphosphooligosaccharide--protein glycosyltransferase subunit STT3B | STT3B   | 498  | S | 1     | 199   | 1.06 | 1.01 | 0.94 | 0.79 | 0.76 | 0.96 | 0.81 | 0.67 | 1.12 |
| Q8TCJ2 | Dolichyl-diphosphooligosaccharide--protein glycosyltransferase subunit STT3B | STT3B   | 499  | S | 1     | 133.8 | 0.93 | 1.01 | 0.99 | 1.02 | 0.73 | 0.99 | 1.09 | 0.82 | 1.02 |
| Q8TD16 | Protein bicaudal D homolog 2                                                 | BICD2   | 582  | S | 1     | 43    | 1.06 | 1.04 | 1.08 | 0.97 | 0.98 | 1.12 | 1.08 | 1.10 | 1.08 |
| Q8TD19 | Serine/threonine-protein kinase Nek9                                         | NEK9    | 868  | S | 0.5   | 127.2 | 1.54 | 1.56 | 1.45 | 1.81 | NaN  | 1.89 | 0.95 | 1.04 | 0.94 |
| Q8TD19 | Serine/threonine-protein kinase Nek9                                         | NEK9    | 869  | S | 0.619 | 127.2 | 1.43 | 1.56 | 1.45 | 1.81 | NaN  | 1.89 | 0.95 | 1.04 | 0.94 |
| Q8TDB6 | E3 ubiquitin-protein ligase DTX3L                                            | DTX3L   | 202  | S | 0.994 | 77.26 | NaN  | NaN  | NaN  | 1.10 | 1.14 | 0.90 | NaN  | NaN  | NaN  |
| Q8TDD1 | ATP-dependent RNA helicase DDX54                                             | DDX54   | 782  | S | 1     | 180.7 | NaN  | NaN  | 1.87 | 1.44 | 1.62 | 1.34 | NaN  | 1.21 | 1.11 |
| Q8TDY2 | RB1-inducible coiled-coil protein 1                                          | RB1CC1  | 647  | S | 0.896 | 101.3 | NaN  | NaN  | 1.20 | NaN  | 0.60 | 0.52 | NaN  | NaN  | NaN  |
| Q8TDY2 | RB1-inducible coiled-coil protein 1                                          | RB1CC1  | 237  | S | 0.862 | 75.89 | 0.43 | 0.59 | NaN  | NaN  | NaN  | NaN  | NaN  | NaN  | NaN  |
| Q8TEA8 | D-tyrosyl-tRNA(Tyr) deacylase 1                                              | DTD1    | 194  | S | 0.751 | 182.2 | 1.49 | NaN  | NaN  | 1.38 | NaN  | 1.13 | NaN  | 1.91 | 1.38 |
| Q8TEA8 | D-tyrosyl-tRNA(Tyr) deacylase 1                                              | DTD1    | 196  | S | 0.993 | 261.9 | 1.49 | 2.03 | 1.63 | 1.38 | 1.23 | NaN  | 1.82 | 1.44 | NaN  |
| Q8TEA8 | D-tyrosyl-tRNA(Tyr) deacylase 1                                              | DTD1    | 197  | S | 1     | 372.7 | 1.49 | 1.82 | 1.79 | 1.38 | 1.40 | 1.48 | 1.39 | 1.89 | 1.93 |
| Q8TF01 | Arginine/serine-rich protein PNISR                                           | PNISR   | 290  | S | 0.941 | 196.8 | 0.86 | NaN  | 0.85 | NaN  | NaN  | 0.70 | 0.77 | NaN  | 0.59 |
| Q8WUA2 | Peptidyl-prolyl cis-trans isomerase-like 4                                   | PPIL4   | 178  | S | 0.97  | 235.1 | NaN  | 1.63 | 1.26 | 1.25 | 1.02 | 1.02 | 1.09 | NaN  | NaN  |

|        |                                                     |          |      |   |       |       |      |      |      |      |      |      |      |      |      |     |
|--------|-----------------------------------------------------|----------|------|---|-------|-------|------|------|------|------|------|------|------|------|------|-----|
| Q8WUF5 | RelA-associated inhibitor                           | PPP1R13L | 567  | S | 0.973 | 49.89 | NaN  | NaN  | NaN  | NaN  | NaN  | NaN  | NaN  | 0.85 | 1.03 | NaN |
| Q8WUX9 | Charged multivesicular body protein 7               | CHMP7    | 417  | S | 1     | 163.2 | 1.41 | 1.28 | 1.40 | NaN  | 0.81 | 1.46 | NaN  | NaN  | NaN  | NaN |
| Q8WVC0 | RNA polymerase-associated protein LEO1              | LEO1     | 171  | S | 1     | 97.3  | 0.64 | 0.66 | NaN  | 0.99 | NaN  | NaN  | NaN  | 0.80 | NaN  | NaN |
| Q8WVC0 | RNA polymerase-associated protein LEO1              | LEO1     | 179  | S | 1     | 97.3  | 0.64 | 0.66 | NaN  | 0.99 | NaN  | NaN  | NaN  | 0.80 | NaN  | NaN |
| Q8WVC0 | RNA polymerase-associated protein LEO1              | LEO1     | 630  | S | 0.93  | 106.9 | 0.85 | 0.89 | 0.83 | 1.07 | 0.83 | 0.68 | 0.98 | 1.01 | 0.94 | NaN |
| Q8WVC0 | RNA polymerase-associated protein LEO1              | LEO1     | 294  | S | 1     | 121.8 | 0.67 | 1.18 | NaN  | 1.13 | 0.49 | 1.00 | 0.79 | 1.53 | 1.04 | NaN |
| Q8WVC0 | RNA polymerase-associated protein LEO1              | LEO1     | 296  | S | 1     | 121.8 | 1.10 | 1.18 | NaN  | 1.13 | 1.03 | 1.00 | 1.42 | 1.53 | 1.12 | NaN |
| Q8WVC0 | RNA polymerase-associated protein LEO1              | LEO1     | 300  | S | 0.99  | 121.8 | 0.67 | 1.18 | NaN  | 1.13 | 0.49 | 1.00 | 0.79 | 1.53 | 1.04 | NaN |
| Q8WVC0 | RNA polymerase-associated protein LEO1              | LEO1     | 658  | S | 1     | 212.3 | 0.94 | 0.98 | 0.82 | 0.98 | 0.88 | 0.87 | 1.08 | 1.03 | 1.00 | NaN |
| Q8WVC0 | RNA polymerase-associated protein LEO1              | LEO1     | 197  | S | 1     | 56.47 | 0.68 | 0.46 | NaN  | NaN  | NaN  | NaN  | 0.66 | NaN  | NaN  | NaN |
| Q8WW12 | PEST proteolytic signal-containing nuclear protein  | PCNP     | 119  | S | 1     | 178.9 | 1.15 | 1.16 | 1.05 | 0.99 | 1.12 | 1.06 | 0.73 | 0.72 | 0.93 | NaN |
| Q8WWM7 | Ataxin-2-like protein                               | ATXN2L   | 594  | S | 0.992 | 278.3 | 1.14 | 0.97 | 0.98 | 1.23 | 1.37 | 1.19 | 0.55 | 0.50 | 0.50 | NaN |
| Q8WWM7 | Ataxin-2-like protein                               | ATXN2L   | 111  | S | 1     | 138.7 | 2.34 | 2.58 | 2.31 | 2.09 | 2.01 | 1.99 | 0.95 | 0.93 | 0.92 | NaN |
| Q8WWM7 | Ataxin-2-like protein                               | ATXN2L   | 449  | S | 1     | 68.89 | 2.18 | 2.09 | 2.17 | 2.25 | 2.02 | 2.18 | 1.17 | 1.19 | 1.23 | NaN |
| Q8WWM7 | Ataxin-2-like protein                               | ATXN2L   | 339  | S | 0.987 | 85.47 | 3.00 | 3.50 | 3.73 | NaN  | NaN  | NaN  | NaN  | 2.80 | 4.07 | NaN |
| Q8WWM7 | Ataxin-2-like protein                               | ATXN2L   | 634  | S | 0.977 | 124   | 0.92 | 0.99 | 0.79 | 0.96 | 0.95 | 1.04 | 0.93 | 0.90 | 0.92 | NaN |
| Q8WWQ0 | PH-interacting protein                              | PHIP     | 1281 | S | 1     | 96.53 | 1.45 | NaN  | 0.85 | 0.78 | 0.46 | 0.83 | 0.85 | 0.88 | 0.88 | NaN |
| Q8WWQ0 | PH-interacting protein                              | PHIP     | 1283 | S | 1     | 96.53 | 1.45 | NaN  | 0.85 | 0.78 | 0.46 | 0.83 | 0.85 | 0.88 | 0.88 | NaN |
| Q8WWQ0 | PH-interacting protein                              | PHIP     | 1783 | S | 1     | 253.1 | 1.16 | 1.04 | 1.22 | 1.30 | 1.03 | 1.25 | 0.98 | 0.95 | 1.02 | NaN |
| Q8WX92 | Negative elongation factor B                        | NELFB    | 557  | S | 0.999 | 125.6 | 0.81 | 0.89 | 0.84 | NaN  | 0.99 | 0.75 | 1.17 | NaN  | 0.94 | NaN |
| Q8WX93 | Palladin                                            | PALLD    | 893  | S | 1     | 176.3 | 1.00 | NaN  | 0.98 | 1.59 | 1.52 | 1.63 | 1.34 | 1.35 | 1.46 | NaN |
| Q8WX93 | Palladin                                            | PALLD    | 1118 | S | 1     | 117.3 | 0.56 | 0.43 | NaN  | 0.53 | 1.51 | 0.61 | 0.54 | 1.96 | 0.49 | NaN |
| Q8WX93 | Palladin                                            | PALLD    | 1121 | S | 1     | 214.3 | 0.55 | 0.53 | 0.51 | 0.58 | 0.64 | 0.55 | 0.62 | 0.55 | 0.49 | NaN |
| Q8WX93 | Palladin                                            | PALLD    | 1116 | S | 1     | 117.3 | 1.57 | 1.49 | NaN  | 1.52 | 1.51 | 1.55 | 1.90 | 1.96 | 1.94 | NaN |
| Q8WXH0 | Nesprin-2                                           | SYNE2    | 6361 | S | 0.99  | 108.7 | 0.65 | 0.63 | 0.85 | 1.14 | 1.12 | 1.12 | NaN  | 0.78 | 0.78 | NaN |
| Q8WYL5 | Protein phosphatase Slingshot homolog 1             | SSH1     | 897  | S | 0.962 | 92.41 | NaN  | NaN  | 1.24 | NaN  | NaN  | NaN  | NaN  | 0.98 | 1.18 | NaN |
| Q8WYP5 | Protein ELYS                                        | AHCTF1   | 528  | S | 1     | 78.69 | 1.16 | 0.87 | NaN  | 1.65 | 1.99 | NaN  | NaN  | NaN  | NaN  | NaN |
| Q8WYP5 | Protein ELYS                                        | AHCTF1   | 1944 | S | 0.986 | 54.54 | 0.48 | NaN  | 0.52 | 0.53 | NaN  | NaN  | 0.56 | NaN  | 0.76 | NaN |
| Q8WYP5 | Protein ELYS                                        | AHCTF1   | 1222 | S | 0.924 | 94.38 | NaN  | NaN  | NaN  | NaN  | 1.66 | 1.99 | 1.75 | 1.38 | NaN  | NaN |
| Q8WYQ5 | Microprocessor complex subunit DGCR8                | DGCR8    | 377  | S | 0.982 | 98.84 | 2.76 | 2.19 | 2.45 | NaN  | 2.50 | 2.38 | 0.67 | 1.01 | 0.96 | NaN |
| Q8WYQ5 | Microprocessor complex subunit DGCR8                | DGCR8    | 275  | S | 0.995 | 74.28 | NaN  | NaN  | NaN  | 1.63 | 1.81 | NaN  | NaN  | NaN  | NaN  | NaN |
| Q92508 | Piezo-type mechanosensitive ion channel component 1 | PIEZO1   | 1621 | S | 0.999 | 177.4 | NaN  | 0.74 | 0.90 | 0.68 | NaN  | NaN  | 0.99 | 0.99 | 1.25 | NaN |

|        |                                                                                   |         |      |   |       |       |      |      |      |      |      |      |       |      |      |
|--------|-----------------------------------------------------------------------------------|---------|------|---|-------|-------|------|------|------|------|------|------|-------|------|------|
| Q92522 | Histone H1x                                                                       | H1FX    | 31   | S | 0.98  | 83.53 | 0.65 | NaN  | 0.59 | 1.22 | 1.24 | 1.03 | NaN   | 0.61 | NaN  |
| Q92538 | Golgi-specific brefeldin A-<br>resistance guanine nucleotide<br>exchange factor 1 | GBF1    | 1780 | S | 0.83  | 44.83 | NaN  | NaN  | NaN  | NaN  | NaN  | NaN  | 10.22 | 4.30 | NaN  |
| Q92538 | Golgi-specific brefeldin A-<br>resistance guanine nucleotide<br>exchange factor 1 | GBF1    | 1784 | S | 0.918 | 44.83 | NaN  | NaN  | NaN  | NaN  | NaN  | NaN  | 10.22 | 4.30 | NaN  |
| Q92538 | Golgi-specific brefeldin A-<br>resistance guanine nucleotide<br>exchange factor 1 | GBF1    | 1298 | S | 1     | 350.1 | 1.12 | 1.28 | 1.28 | 1.13 | 1.12 | 1.51 | 1.91  | 1.87 | 1.67 |
| Q92538 | Golgi-specific brefeldin A-<br>resistance guanine nucleotide<br>exchange factor 1 | GBF1    | 1318 | S | 0.994 | 130.3 | 1.60 | 1.70 | 1.52 | 1.55 | 1.52 | 1.53 | 2.48  | 2.44 | 2.36 |
| Q92538 | Golgi-specific brefeldin A-<br>resistance guanine nucleotide<br>exchange factor 1 | GBF1    | 1773 | S | 1     | 144.2 | 1.22 | 1.37 | 2.85 | 2.90 | NaN  | 2.49 | NaN   | NaN  | 1.04 |
| Q92576 | PHD finger protein 3                                                              | PHF3    | 1133 | S | 1     | 84.3  | NaN  | 0.55 | 0.62 | 0.95 | 1.06 | 1.13 | 0.57  | NaN  | 0.62 |
| Q92576 | PHD finger protein 3                                                              | PHF3    | 1642 | S | 1     | 44.72 | 0.90 | 0.76 | NaN  | NaN  | NaN  | NaN  | NaN   | NaN  | NaN  |
| Q92614 | Unconventional myosin-XVIIIa                                                      | MYO18A  | 1998 | S | 1     | 72.82 | 0.61 | 0.59 | NaN  | 0.75 | NaN  | 0.71 | NaN   | NaN  | 0.60 |
| Q92614 | Unconventional myosin-XVIIIa                                                      | MYO18A  | 102  | S | 0.905 | 77.44 | 1.01 | 0.69 | NaN  | NaN  | NaN  | NaN  | NaN   | NaN  | NaN  |
| Q92614 | Unconventional myosin-XVIIIa                                                      | MYO18A  | 1942 | S | 1     | 123.4 | NaN  | NaN  | NaN  | 0.69 | 0.78 | 1.05 | NaN   | NaN  | NaN  |
| Q92614 | Unconventional myosin-XVIIIa                                                      | MYO18A  | 1970 | S | 1     | 91.1  | 0.75 | 0.74 | NaN  | 0.97 | 1.51 | NaN  | NaN   | NaN  | NaN  |
| Q92614 | Unconventional myosin-XVIIIa                                                      | MYO18A  | 2020 | S | 1     | 184.4 | 0.97 | 0.97 | 0.95 | 1.03 | 1.07 | 0.88 | 1.01  | 1.03 | 0.92 |
| Q92614 | Unconventional myosin-XVIIIa                                                      | MYO18A  | 2007 | S | 0.999 | 115.8 | NaN  | 0.78 | 0.62 | 0.75 | 0.73 | 0.76 | 0.61  | 0.60 | 0.54 |
| Q92614 | Unconventional myosin-XVIIIa                                                      | MYO18A  | 2041 | S | 1     | 185   | 0.94 | 0.71 | 0.93 | 0.86 | 0.92 | 0.90 | 1.02  | 0.93 | 0.84 |
| Q92614 | Unconventional myosin-XVIIIa                                                      | MYO18A  | 2043 | S | 0.993 | 145.7 | 1.03 | 0.96 | 0.88 | 0.89 | 0.85 | 0.90 | 0.99  | 0.80 | 0.92 |
| Q92619 | Minor histocompatibility<br>protein HA-1;Minor<br>histocompatibility antigen HA-  | HMHA1   | 23   | S | 0.996 | 103.7 | NaN  | 4.72 | 1.35 | 1.04 | 1.09 | 0.88 | 1.68  | 1.75 | 1.44 |
| Q92667 | A-kinase anchor protein 1,<br>mitochondrial                                       | AKAP1   | 150  | S | 0.699 | 139.5 | 1.36 | 1.37 | NaN  | 2.07 | 2.04 | NaN  | NaN   | NaN  | NaN  |
| Q92667 | A-kinase anchor protein 1,<br>mitochondrial                                       | AKAP1   | 151  | S | 0.5   | 122.5 | 1.36 | NaN  | NaN  | 2.07 | 2.04 | NaN  | NaN   | NaN  | NaN  |
| Q92733 | Proline-rich protein PRCC                                                         | PRCC    | 157  | S | 1     | 104.8 | 1.01 | 1.04 | NaN  | 0.98 | 1.02 | 1.00 | 1.05  | 0.92 | 1.03 |
| Q92733 | Proline-rich protein PRCC                                                         | PRCC    | 159  | S | 1     | 104.8 | 1.01 | 1.04 | NaN  | 0.98 | 1.02 | 1.00 | 1.05  | 0.92 | 1.03 |
| Q92733 | Proline-rich protein PRCC                                                         | PRCC    | 267  | S | 1     | 128.7 | 0.76 | 0.73 | 0.66 | 0.63 | 0.68 | 0.72 | 0.59  | 0.66 | 0.62 |
| X6RAB3 | USP6 N-terminal-like protein                                                      | USP6NL  | 739  | S | 0.948 | 83.88 | 1.62 | 1.41 | 1.28 | 1.42 | 1.40 | NaN  | 1.53  | NaN  | 1.17 |
| Q92769 | Histone deacetylase 2                                                             | HDAC2   | 422  | S | 1     | 171.3 | 0.47 | NaN  | 0.46 | NaN  | 0.53 | 0.48 | NaN   | 0.45 | NaN  |
| Q92769 | Histone deacetylase 2                                                             | HDAC2   | 394  | S | 1     | 243.5 | 0.53 | 0.53 | NaN  | 0.71 | 1.39 | NaN  | 0.47  | 0.37 | 0.31 |
| Q92797 | Symplekin                                                                         | SYMPK   | 1171 | S | 0.895 | 76.97 | NaN  | 0.91 | NaN  | NaN  | 1.05 | NaN  | 1.27  | NaN  | 1.76 |
| Q92797 | Symplekin                                                                         | SYMPK   | 1259 | S | 1     | 120.7 | 0.67 | 0.85 | 0.62 | 1.11 | NaN  | 1.07 | 0.78  | 0.67 | 0.84 |
| Q92882 | Osteoclast-stimulating factor 1<br>G patch domain and KOW                         | OSTF1   | 213  | S | 1     | 281.5 | 0.92 | 0.94 | 0.92 | 0.82 | 0.86 | 0.86 | 1.03  | 1.01 | 0.98 |
| Q92917 | motifs-containing protein                                                         | GPKOW   | 42   | S | 0.999 | 62.1  | 1.49 | 1.65 | NaN  | NaN  | NaN  | NaN  | NaN   | NaN  | NaN  |
| Q92922 | SWI/SNF complex subunit<br>SMARCC1                                                | SMARCC1 | 328  | S | 1     | 101.2 | 0.90 | 0.97 | 0.93 | NaN  | 1.16 | NaN  | 1.01  | 1.02 | 1.23 |

|        |                                                                                                                                                    |          |      |   |       |       |      |      |      |      |      |      |      |      |      |
|--------|----------------------------------------------------------------------------------------------------------------------------------------------------|----------|------|---|-------|-------|------|------|------|------|------|------|------|------|------|
| Q92922 | SWI/SNF complex subunit SMARCC1                                                                                                                    | SMARCC1  | 330  | S | 1     | 101.2 | 0.90 | 0.97 | 0.93 | NaN  | 1.16 | NaN  | 1.01 | 1.02 | 1.23 |
| V9GYM8 | Rho guanine nucleotide exchange factor 2                                                                                                           | ARHGEF2  | 741  | S | 1     | 111.2 | NaN  | NaN  | NaN  | 1.21 | 1.42 | 1.30 | 0.84 | 0.90 | 1.05 |
| V9GYM8 | Rho guanine nucleotide exchange factor 2                                                                                                           | ARHGEF2  | 977  | S | 1     | 139.9 | 0.78 | 0.72 | 0.61 | 0.85 | 0.76 | 0.81 | 0.92 | 0.89 | NaN  |
| V9GYM8 | Rho guanine nucleotide exchange factor 2                                                                                                           | ARHGEF2  | 1005 | S | 0.988 | 70.18 | NaN  | 1.05 | 0.90 | NaN  | 0.87 | 1.12 | NaN  | 0.91 | 1.00 |
| V9GYM8 | Rho guanine nucleotide exchange factor 2                                                                                                           | ARHGEF2  | 690  | S | 0.99  | 76.28 | 5.38 | 5.97 | 5.34 | 4.20 | 4.83 | NaN  | NaN  | NaN  | NaN  |
| Q93008 | Probable ubiquitin carboxyl-terminal hydrolase FAF-X                                                                                               | USP9X    | 2563 | S | 0.997 | 70.7  | NaN  | NaN  | 0.81 | 1.54 | 1.66 | NaN  | 0.88 | 0.96 | NaN  |
| Q969E4 | Transcription elongation factor A protein-like 3                                                                                                   | TCEAL3   | 65   | S | 1     | 242.2 | 1.32 | 1.25 | 1.21 | 1.04 | 1.17 | 1.09 | 1.26 | 1.32 | 1.11 |
| Q969E4 | Transcription elongation factor A protein-like 3;Transcription elongation factor A protein-like 6;Transcription elongation factor A protein-like 5 | TCEAL3   | 121  | S | 1     | 276   | 0.80 | 0.80 | 0.89 | 1.11 | 1.06 | 1.15 | 1.16 | 1.26 | 1.14 |
| Q969E4 | Transcription elongation factor A protein-like 3;Transcription elongation factor A protein-like 6;Transcription elongation factor A protein-like 5 | TCEAL3   | 125  | S | 1     | 130.7 | 2.49 | 2.01 | NaN  | NaN  | NaN  | NaN  | 2.80 | 2.25 | NaN  |
| Q969S3 | Zinc finger protein 622                                                                                                                            | ZNF622   | 141  | S | 0.794 | 80.69 | NaN  | 1.11 | 1.05 | 1.61 | 1.65 | 1.66 | NaN  | 0.49 | 0.43 |
| Q969S3 | Zinc finger protein 622                                                                                                                            | ZNF622   | 143  | S | 0.76  | 71.35 | 1.12 | NaN  | 1.05 | NaN  | NaN  | NaN  | 0.51 | NaN  | NaN  |
| Q96AE4 | Far upstream element-binding protein 1                                                                                                             | FUBP1    | 630  | S | 0.906 | 109.9 | 1.03 | NaN  | NaN  | 1.44 | 1.49 | NaN  | NaN  | NaN  | NaN  |
| Q96AT1 | Uncharacterized protein KIAA1143                                                                                                                   | KIAA1143 | 50   | S | 1     | 178.9 | 0.67 | 0.77 | 0.63 | 0.74 | 0.68 | 0.76 | 0.76 | 0.81 | 0.80 |
| Q96B36 | Proline-rich AKT1 substrate 1                                                                                                                      | AKT1S1   | 88   | S | 0.994 | 119.7 | 1.17 | NaN  | 1.10 | 1.30 | 1.14 | 1.11 | NaN  | NaN  | 1.00 |
| Q96B36 | Proline-rich AKT1 substrate 1                                                                                                                      | AKT1S1   | 92   | S | 0.879 | 119.7 | 1.36 | NaN  | 1.07 | 1.30 | 1.14 | 1.11 | NaN  | NaN  | NaN  |
| Q96B36 | Proline-rich AKT1 substrate 1                                                                                                                      | AKT1S1   | 203  | S | 0.999 | 221.9 | 1.03 | 0.90 | 1.12 | 0.98 | 0.93 | 0.93 | 1.21 | 1.33 | 1.14 |
| Q96B36 | Proline-rich AKT1 substrate 1                                                                                                                      | AKT1S1   | 211  | S | 0.839 | 211.1 | 1.05 | 0.99 | 1.03 | NaN  | 0.96 | 0.96 | 1.21 | 1.33 | NaN  |
| Q96B36 | Proline-rich AKT1 substrate 1                                                                                                                      | AKT1S1   | 212  | S | 0.9   | 229.8 | 0.93 | 0.90 | 1.22 | 0.98 | 0.99 | 0.90 | NaN  | 1.22 | 1.14 |
| Q96C19 | EF-hand domain-containing protein D2                                                                                                               | EFHD2    | 74   | S | 0.959 | 126   | 3.70 | 3.35 | 3.21 | 2.32 | 2.48 | 3.22 | NaN  | 1.92 | NaN  |
| Q96C19 | EF-hand domain-containing protein D2                                                                                                               | EFHD2    | 76   | S | 0.5   | 65.44 | NaN  | NaN  | NaN  | 2.64 | 3.39 | NaN  | NaN  | NaN  | NaN  |
| Q96C90 | Protein phosphatase 1 regulatory subunit 14B                                                                                                       | PPP1R14B | 32   | S | 1     | 76.82 | 5.00 | 3.75 | NaN  | 4.39 | 3.29 | NaN  | NaN  | NaN  | NaN  |
| Q96CW6 | Probable RNA polymerase II nuclear localization protein SLC7A6OS                                                                                   | SLC7A6OS | 308  | S | 1     | 178.4 | 0.70 | 0.56 | 0.66 | 0.96 | 0.98 | 0.87 | 0.71 | 0.70 | 0.75 |
| Q96CX2 | BTB/POZ domain-containing protein KCTD12                                                                                                           | KCTD12   | 176  | S | 0.807 | 137.5 | 0.91 | 0.98 | 0.88 | NaN  | 1.40 | 1.19 | NaN  | NaN  | NaN  |



|        |                                                                                   |         |     |   |       |       |      |      |      |      |      |      |      |      |      |
|--------|-----------------------------------------------------------------------------------|---------|-----|---|-------|-------|------|------|------|------|------|------|------|------|------|
| Q96CX2 | BTB/POZ domain-containing protein KCTD12                                          | KCTD12  | 185 | S | 0.887 | 105.7 | NaN  | 0.91 | 0.76 | 0.96 | 0.90 | 1.12 | 0.78 | 0.72 | 1.07 |
| Q96CX2 | BTB/POZ domain-containing protein KCTD12                                          | KCTD12  | 187 | S | 0.54  | 97.49 | 0.94 | 0.91 | NaN  | NaN  | 0.90 | 1.12 | NaN  | NaN  | NaN  |
| Q96E09 | Protein FAM122A NAD-dependent protein deacetylase sirtuin-1;Sirt1 75 kDa fragment | FAM122A | 270 | S | 0.942 | 87.2  | 0.81 | 0.96 | NaN  | 0.91 | 0.81 | 1.00 | 1.21 | 1.20 | 1.30 |
| Q96EB6 | Ribosomal RNA processing protein 36 homolog                                       | SIRT1   | 27  | S | 0.936 | 97.96 | NaN  | NaN  | 0.84 | 0.89 | NaN  | 1.25 | 1.22 | 1.13 | 1.17 |
| Q96EU6 | RNA-binding protein 33                                                            | RRP36   | 73  | S | 1     | 88.19 | 1.19 | 0.98 | 0.78 | 1.14 | 1.12 | 1.15 | 0.58 | 0.55 | NaN  |
| Q96EV2 | RNA-binding protein 33                                                            | RBM33   | 41  | S | 1     | 139.7 | 2.02 | 2.02 | NaN  | NaN  | NaN  | NaN  | 2.35 | 2.07 | 0.76 |
| Q96EV2 | RNA-binding protein 33                                                            | RBM33   | 205 | S | 1     | 248.7 | 0.85 | 1.13 | 1.03 | 0.99 | 1.02 | 1.00 | 0.94 | 0.95 | 1.02 |
| Q96EV2 | tRNA-dihydrouridine(47) synthase [NAD(P)(+)]-like                                 | RBM33   | 765 | S | 1     | 79.99 | NaN  | 0.81 | 0.83 | 1.00 | 0.91 | 0.95 | 0.76 | 0.86 | 0.82 |
| Q96G46 | Target of EGR1 protein 1                                                          | DUS3L   | 276 | S | 0.629 | 101   | NaN  | NaN  | NaN  | 0.94 | 0.65 | NaN  | NaN  | 1.32 | 1.16 |
| Q96GM8 | Methylthioribulose-1-phosphate dehydratase                                        | TOE1    | 5   | S | 1     | 241.9 | 0.69 | 0.62 | NaN  | NaN  | NaN  | 0.69 | 0.69 | NaN  | 0.89 |
| S4R3D6 | H/ACA ribonucleoprotein complex non-core subunit                                  | APIP    | 40  | S | 0.974 | 114.7 | 1.02 | 1.11 | 1.18 | 0.97 | 1.01 | 1.06 | 1.17 | 0.86 | 1.08 |
| Q96HR8 | Splicing factor 45                                                                | NAF1    | 315 | S | 1     | 94    | 0.96 | 1.14 | 1.14 | 1.25 | 1.18 | 1.45 | 1.00 | 1.11 | 1.07 |
| Q96I25 | Splicing factor 45                                                                | RBM17   | 222 | S | 0.859 | 179.7 | 0.70 | 0.57 | 0.69 | NaN  | NaN  | 0.88 | 0.61 | NaN  | NaN  |
| Q96I25 | LIM domain-containing protein ajuba                                               | RBM17   | 155 | S | 1     | 188.3 | 0.99 | 1.01 | 0.90 | 0.92 | 0.93 | 1.04 | 1.06 | 1.03 | 0.82 |
| Q96IF1 | LIM domain-containing protein ajuba                                               | AJUBA   | 119 | S | 1     | 144.6 | NaN  | 1.68 | 1.49 | 1.49 | 1.54 | NaN  | 1.12 | 1.08 | NaN  |
| Q96IF1 | Chromosome alignment-maintaining phosphoprotein 1                                 | AJUBA   | 137 | S | 0.999 | 401.3 | 1.47 | 1.15 | NaN  | 1.13 | 1.07 | 0.83 | 0.84 | 0.73 | 0.70 |
| Q96JM3 | Chromosome alignment-maintaining phosphoprotein 1                                 | CHAMP1  | 416 | S | 1     | 85.81 | 1.03 | 0.87 | 1.13 | NaN  | NaN  | 1.58 | 1.04 | 0.97 | NaN  |
| Q96JM3 | Chromosome alignment-maintaining phosphoprotein 1                                 | CHAMP1  | 476 | S | 1     | 135.6 | 0.84 | 0.88 | 0.86 | 0.95 | 1.04 | 1.08 | 1.09 | 1.03 | 1.17 |
| Q96JM3 | Chromosome alignment-maintaining phosphoprotein 1                                 | CHAMP1  | 651 | S | 0.911 | 106.9 | NaN  | 0.70 | 0.80 | 0.82 | 0.68 | 0.82 | 0.91 | 1.06 | 0.72 |
| Q96JM3 | Chromosome alignment-maintaining phosphoprotein 1                                 | CHAMP1  | 652 | S | 0.787 | 73.68 | NaN  | NaN  | NaN  | NaN  | 0.68 | 0.82 | 0.91 | 1.06 | 0.72 |
| Q96JM3 | Chromosome alignment-maintaining phosphoprotein 1                                 | CHAMP1  | 653 | S | 0.818 | 106.9 | NaN  | 0.70 | 0.80 | 0.82 | 0.68 | NaN  | NaN  | NaN  | 0.72 |
| Q96JM3 | Chromosome alignment-maintaining phosphoprotein 1                                 | CHAMP1  | 427 | S | 1     | 58.78 | 1.53 | NaN  | 1.54 | 1.99 | 2.21 | 1.76 | 0.82 | 1.78 | 1.30 |
| Q96JM3 | Chromosome alignment-maintaining phosphoprotein 1                                 | CHAMP1  | 432 | S | 1     | 58.78 | 1.53 | NaN  | 1.54 | 1.99 | 2.21 | 1.76 | NaN  | 1.78 | 1.78 |
| Q96JM3 | Chromosome alignment-maintaining phosphoprotein 1                                 | CHAMP1  | 436 | S | 1     | 58.78 | 1.53 | NaN  | 1.54 | 1.99 | 2.21 | 1.76 | NaN  | 1.78 | 1.78 |
| Q96JM3 | Chromosome alignment-maintaining phosphoprotein 1                                 | CHAMP1  | 443 | S | 0.737 | 56.47 | NaN  | NaN  | NaN  | 0.98 | 0.96 | 0.88 | 1.04 | 0.91 | NaN  |
| Q96JM3 | Chromosome alignment-maintaining phosphoprotein 1                                 | CHAMP1  | 445 | S | 0.598 | 83.25 | 0.46 | 0.58 | NaN  | 0.98 | 0.96 | 0.88 | 0.59 | NaN  | 0.40 |

|        |                                                                            |         |      |   |       |       |      |      |      |      |      |      |      |      |      |
|--------|----------------------------------------------------------------------------|---------|------|---|-------|-------|------|------|------|------|------|------|------|------|------|
| Q96JM3 | Chromosome alignment-maintaining phosphoprotein 1                          | CHAMP1  | 452  | S | 1     | 83.25 | 0.46 | 0.58 | NaN  | 1.10 | 0.94 | 0.88 | 0.59 | NaN  | 0.40 |
| Q96JM3 | Chromosome alignment-maintaining phosphoprotein 1                          | CHAMP1  | 282  | S | 0.983 | 86.3  | 0.44 | 0.92 | 0.53 | 0.48 | NaN  | 0.46 | 0.86 | 0.87 | 1.24 |
| Q96JM3 | Chromosome alignment-maintaining phosphoprotein 1                          | CHAMP1  | 405  | S | 0.993 | 79.35 | 1.19 | 0.71 | NaN  | 0.96 | 1.13 | 0.92 | 0.49 | 0.58 | 0.81 |
| Q96JM3 | Chromosome alignment-maintaining phosphoprotein 1                          | CHAMP1  | 204  | S | 1     | 115.1 | 0.59 | 0.64 | 0.63 | 0.75 | 0.75 | 0.64 | 0.81 | 0.90 | 0.84 |
| Q96JM3 | Chromosome alignment-maintaining phosphoprotein 1                          | CHAMP1  | 214  | S | 0.996 | 115.1 | 0.77 | 0.60 | 0.68 | 0.98 | 0.99 | 0.91 | 0.85 | 0.82 | 0.83 |
| Q96JM3 | Chromosome alignment-maintaining phosphoprotein 1                          | CHAMP1  | 382  | S | 0.715 | 69.47 | NaN  | NaN  | 1.29 | 2.05 | 1.73 | NaN  | 1.17 | 1.22 | NaN  |
| Q96JM3 | Chromosome alignment-maintaining phosphoprotein 1                          | CHAMP1  | 386  | S | 0.964 | 69.47 | NaN  | NaN  | 1.29 | 2.05 | 1.73 | NaN  | 1.17 | 1.22 | NaN  |
| Q96JM3 | Chromosome alignment-maintaining phosphoprotein 1                          | CHAMP1  | 275  | S | 0.993 | 114.2 | 0.70 | NaN  | NaN  | NaN  | NaN  | NaN  | 1.06 | NaN  | 0.79 |
| Q96K76 | Ubiquitin carboxyl-terminal hydrolase 47                                   | USP47   | 910  | S | 1     | 220.1 | 1.09 | NaN  | NaN  | NaN  | NaN  | NaN  | 0.72 | 1.07 | NaN  |
| Q96KR1 | Zinc finger RNA-binding                                                    | ZFR     | 1054 | S | 1     | 115.6 | 1.07 | 0.99 | 1.05 | 0.91 | 0.98 | 0.95 | 1.14 | 1.17 | 1.51 |
| Q96N66 | Lysophospholipid acyltransferase 7                                         | MBOAT7  | 284  | S | 0.933 | 157.4 | 1.00 | 0.99 | 1.21 | 1.74 | 1.69 | 1.67 | 1.00 | 0.92 | NaN  |
| Q96N66 | Lysophospholipid acyltransferase 7                                         | MBOAT7  | 285  | S | 0.529 | 76.03 | 1.09 | NaN  | 1.21 | 1.59 | NaN  | 1.55 | 1.00 | 0.92 | NaN  |
| Q96N67 | Dedicator of cytokinesis protein 7                                         | DOCK7   | 900  | S | 0.998 | 268.4 | 0.89 | NaN  | 1.04 | 1.18 | 1.44 | NaN  | 3.18 | NaN  | NaN  |
| Q96N67 | Dedicator of cytokinesis protein 7                                         | DOCK7   | 910  | S | 0.873 | 207   | NaN  | NaN  | 1.04 | 1.18 | 0.98 | NaN  | 3.18 | 0.88 | NaN  |
| Q96NE9 | FERM domain-containing protein 6                                           | FRMD6   | 522  | S | 0.997 | 151.6 | NaN  | NaN  | 1.82 | 1.13 | 1.10 | NaN  | NaN  | 2.94 | 2.65 |
| Q96NE9 | FERM domain-containing protein 6                                           | FRMD6   | 544  | S | 1     | 127.2 | 2.31 | 1.98 | NaN  | 1.17 | 1.12 | 1.30 | 2.06 | 2.40 | 1.91 |
| Q96NY7 | Chloride intracellular channel protein 6                                   | CLIC6   | 293  | S | 1     | 156.2 | 2.04 | 2.11 | 1.92 | 0.99 | 1.68 | NaN  | NaN  | 1.20 | NaN  |
| Q96NY7 | Chloride intracellular channel protein 6                                   | CLIC6   | 305  | S | 0.999 | 156.2 | 2.04 | 2.11 | 1.92 | 1.96 | 1.68 | NaN  | NaN  | 1.20 | NaN  |
| Q96P48 | Arf-GAP with Rho-GAP domain, ANK repeat and PH domain-containing protein 1 | ARAP1   | 229  | S | 1     | 102.6 | 0.76 | 0.63 | 0.59 | 0.77 | 0.71 | NaN  | 1.36 | 1.33 | 1.30 |
| Q96PK6 | RNA-binding protein 14                                                     | RBM14   | 215  | S | 1     | 68.17 | 1.41 | NaN  | 1.24 | 1.09 | 1.19 | 1.19 | 1.30 | 1.27 | 1.25 |
| Q96PK6 | RNA-binding protein 14                                                     | RBM14   | 220  | S | 1     | 68.17 | 1.41 | NaN  | 1.24 | 1.09 | 1.19 | 1.19 | 1.30 | 1.27 | 1.25 |
| Q96PX8 | SLIT and NTRK-like protein 1                                               | SLITRK1 | 586  | S | 0.986 | 79.04 | NaN  | NaN  | 1.05 | 0.91 | 0.70 | NaN  | 1.17 | 1.14 | NaN  |
| Q96QB1 | Rho GTPase-activating protein 7                                            | DLC1    | 523  | S | 1     | 91.73 | 1.42 | NaN  | 2.02 | 1.04 | 1.10 | NaN  | 1.88 | 1.76 | 2.03 |
| Q96QB1 | Rho GTPase-activating protein 7                                            | DLC1    | 526  | S | 1     | 180.7 | 1.42 | NaN  | 2.02 | 1.04 | 1.10 | NaN  | 1.88 | 1.76 | 2.03 |

|        |                                                              |         |      |   |       |       |      |      |      |      |      |      |      |      |      |
|--------|--------------------------------------------------------------|---------|------|---|-------|-------|------|------|------|------|------|------|------|------|------|
| Q96QC0 | Serine/threonine-protein phosphatase 1 regulatory subunit 10 | PPP1R10 | 545  | S | 0.93  | 88.72 | 0.40 | 0.59 | NaN  | NaN  | 0.96 | 0.95 | 0.49 | NaN  | NaN  |
| Q96QC0 | Serine/threonine-protein phosphatase 1 regulatory subunit 10 | PPP1R10 | 313  | S | 0.997 | 78.92 | 1.74 | 2.44 | 2.34 | 1.99 | 1.93 | 2.23 | 1.46 | 1.55 | NaN  |
| Q96QR8 | Transcriptional activator protein Pur-beta                   | PURB    | 304  | S | 1     | 165.2 | 1.36 | 1.43 | 1.59 | 1.22 | 1.17 | 1.33 | 1.38 | 1.51 | 1.61 |
| Q96RL1 | BRCA1-A complex subunit RAP80                                | UIMC1   | 677  | S | 1     | 57.2  | NaN  | NaN  | NaN  | NaN  | 1.27 | 1.14 | 1.21 | NaN  | 1.42 |
| Q96RT1 | Protein LAP2                                                 | ERBB2IP | 852  | S | 0.877 | 68.36 | 1.07 | NaN  | NaN  | NaN  | 0.60 | NaN  | 1.35 | 0.97 | NaN  |
| Q96RT1 | Protein LAP2                                                 | ERBB2IP | 857  | S | 1     | 97.45 | 1.18 | 0.27 | NaN  | 1.44 | 1.56 | 0.95 | 1.02 | NaN  | 1.07 |
| Q96RU3 | Formin-binding protein 1                                     | FNBP1   | 359  | S | 0.999 | 94.73 | 0.74 | 0.73 | 0.66 | 0.79 | 0.80 | 0.74 | 0.74 | 0.75 | 0.71 |
| Q96S55 | ATPase WRNIP1                                                | WRNIP1  | 65   | S | 1     | 78.52 | NaN  | NaN  | 0.73 | 0.80 | 0.85 | 0.87 | 0.88 | 0.85 | 0.82 |
| Q96S94 | Cyclin-L2                                                    | CCNL2   | 369  | S | 1     | 70.52 | NaN  | NaN  | 1.08 | NaN  | NaN  | NaN  | 1.08 | 0.99 | NaN  |
| Q96S94 | Cyclin-L2                                                    | CCNL2   | 348  | S | 0.933 | 40.73 | NaN  | NaN  | 0.92 | NaN  | 0.78 | NaN  | 1.02 | 1.15 | NaN  |
| Q96ST2 | Protein IWS1 homolog                                         | IWS1    | 398  | S | 1     | 105.5 | 0.96 | 1.01 | 0.97 | 0.94 | 0.93 | 0.99 | 1.09 | 1.11 | 1.15 |
| Q96ST2 | Protein IWS1 homolog                                         | IWS1    | 400  | S | 1     | 105.5 | 0.96 | 1.01 | 0.97 | 0.94 | 0.93 | 0.99 | 1.09 | 1.11 | 1.15 |
| Q96ST2 | Protein IWS1 homolog                                         | IWS1    | 511  | S | 1     | 127.1 | 0.74 | 0.87 | 0.89 | 0.93 | 0.89 | 1.14 | 0.97 | 1.00 | 1.45 |
| Q96ST2 | Protein IWS1 homolog                                         | IWS1    | 513  | S | 1     | 127.1 | 0.74 | 0.87 | 0.89 | 0.93 | 0.89 | 1.14 | 0.97 | 1.00 | 1.45 |
| Q96ST2 | Protein IWS1 homolog                                         | IWS1    | 235  | S | 1     | 52.27 | NaN  | NaN  | NaN  | NaN  | 0.89 | 0.88 | 1.21 | 1.00 | 1.17 |
| Q96ST2 | Protein IWS1 homolog                                         | IWS1    | 237  | S | 1     | 52.27 | NaN  | NaN  | NaN  | NaN  | 0.89 | 0.88 | 1.21 | 1.00 | 1.17 |
| Q96ST2 | Protein IWS1 homolog                                         | IWS1    | 196  | S | 1     | 46.57 | NaN  | NaN  | 1.71 | 1.44 | 1.34 | 0.81 | NaN  | 1.50 | 1.66 |
| Q96ST2 | Protein IWS1 homolog                                         | IWS1    | 198  | S | 1     | 46.57 | NaN  | NaN  | 1.71 | 1.44 | 1.34 | NaN  | NaN  | 1.50 | 1.66 |
| Q96ST2 | Protein IWS1 homolog                                         | IWS1    | 248  | S | 1     | 74.78 | 1.32 | 1.47 | 1.46 | 1.68 | 1.60 | 0.76 | 1.87 | 1.50 | 0.98 |
| Q96ST2 | Protein IWS1 homolog                                         | IWS1    | 250  | S | 0.996 | 74.78 | 1.32 | 1.47 | 1.46 | 1.68 | 1.60 | NaN  | 1.87 | 1.50 | NaN  |
| Q96ST2 | Protein IWS1 homolog                                         | IWS1    | 261  | S | 0.894 | 49    | 0.85 | 0.94 | 0.93 | NaN  | 0.62 | 0.76 | NaN  | 0.98 | 0.98 |
| Q96ST2 | Protein IWS1 homolog                                         | IWS1    | 263  | S | 0.925 | 49    | 0.85 | 0.94 | 0.93 | NaN  | 0.62 | 0.76 | NaN  | 0.98 | 0.98 |
| Q96ST2 | Protein IWS1 homolog                                         | IWS1    | 274  | S | 0.977 | 59.36 | NaN  | 0.91 | 0.97 | NaN  | 0.85 | NaN  | NaN  | 0.94 | 0.70 |
| Q96ST2 | Protein IWS1 homolog                                         | IWS1    | 287  | S | 1     | 92.68 | NaN  | 0.91 | 0.97 | NaN  | 0.85 | NaN  | NaN  | 0.94 | NaN  |
| Q96ST2 | Protein IWS1 homolog                                         | IWS1    | 289  | S | 1     | 92.68 | NaN  | 0.91 | 0.97 | NaN  | 0.85 | NaN  | NaN  | 0.94 | 0.70 |
| Q96ST2 | Protein IWS1 homolog                                         | IWS1    | 377  | S | 1     | 131.7 | 0.74 | 0.70 | 0.70 | 0.70 | 0.87 | 0.80 | 0.72 | 0.63 | 0.80 |
| Q96ST2 | Protein IWS1 homolog                                         | IWS1    | 438  | S | 1     | 199.8 | 0.99 | 0.89 | 1.05 | 0.94 | 0.92 | 0.90 | 0.96 | 1.22 | 1.02 |
| Q96ST2 | Protein IWS1 homolog                                         | IWS1    | 440  | S | 1     | 199.8 | 0.99 | 0.89 | 1.05 | 0.94 | 0.92 | 0.90 | 0.96 | 1.22 | 1.02 |
| Q96ST2 | Protein IWS1 homolog                                         | IWS1    | 300  | S | 0.999 | 101.2 | NaN  | NaN  | 0.45 | 0.42 | NaN  | 0.67 | 0.43 | 1.11 | 0.60 |
| Q96ST2 | Protein IWS1 homolog                                         | IWS1    | 313  | S | 0.996 | 101.2 | NaN  | NaN  | 0.45 | 0.42 | NaN  | 0.50 | 0.43 | 0.37 | 0.60 |
| Q96ST2 | Protein IWS1 homolog                                         | IWS1    | 415  | S | 1     | 166.7 | 0.36 | NaN  | NaN  | NaN  | 0.34 | 0.40 | NaN  | NaN  | 0.41 |
| Q96ST2 | Protein IWS1 homolog                                         | IWS1    | 420  | S | 1     | 196.7 | 0.36 | NaN  | 0.36 | 0.28 | NaN  | 0.40 | 0.34 | 0.38 | 0.41 |
| Q96ST2 | Protein IWS1 homolog                                         | IWS1    | 422  | S | 1     | 196.7 | NaN  | NaN  | 0.36 | 0.28 | 0.34 | NaN  | 0.34 | 0.38 | NaN  |
| Q96ST3 | Paired amphipathic helix protein Sin3a                       | SIN3A   | 832  | S | 1     | 196.5 | NaN  | 0.49 | 0.47 | NaN  | 0.87 | 0.73 | NaN  | 0.72 | 0.75 |
| Q96T23 | Remodeling and spacing factor 1                              | RSF1    | 604  | S | 1     | 92.83 | 0.77 | 0.77 | 0.75 | 1.00 | 0.72 | 0.81 | 0.93 | 1.07 | 0.97 |
| Q96T23 | Remodeling and spacing factor 1                              | RSF1    | 1345 | S | 1     | 138.3 | 0.91 | NaN  | NaN  | NaN  | 0.57 | 0.76 | NaN  | NaN  | 1.02 |
| Q96T23 | Remodeling and spacing factor 1                              | RSF1    | 397  | S | 1     | 55.45 | 0.63 | NaN  | 0.77 | NaN  | 1.12 | 1.01 | 0.68 | 0.78 | 0.59 |

|        |                                             |           |      |   |       |       |      |      |      |      |      |      |      |      |      |
|--------|---------------------------------------------|-----------|------|---|-------|-------|------|------|------|------|------|------|------|------|------|
| Q96T23 | Remodeling and spacing factor 1             | RSF1      | 622  | S | 0.999 | 116.9 | 0.76 | 0.72 | 0.69 | 0.96 | 0.73 | 0.78 | 0.94 | 1.01 | 1.07 |
| Q96T23 | Remodeling and spacing factor 1             | RSF1      | 629  | S | 0.773 | 100.8 | 0.73 | 0.84 | NaN  | 0.96 | 0.99 | 0.65 | 0.89 | NaN  | 1.07 |
| Q96T23 | Remodeling and spacing factor 1             | RSF1      | 1359 | S | 0.984 | 65.89 | 0.64 | 0.69 | 0.54 | 0.59 | 0.69 | 0.58 | 0.70 | 0.51 | 0.76 |
| Q96T23 | Remodeling and spacing factor 1             | RSF1      | 1375 | S | 0.904 | 65.89 | 0.64 | 0.69 | 0.54 | 0.59 | 0.69 | 0.58 | 0.70 | 0.51 | 0.76 |
| Q96T58 | Msx2-interacting protein                    | SPEN      | 727  | S | 1     | 64.06 | 0.95 | 0.76 | NaN  | NaN  | NaN  | NaN  | NaN  | NaN  | NaN  |
| Q96TA1 | Niban-like protein 1                        | FAM129B   | 691  | S | 0.89  | 232.1 | NaN  | 1.05 | 2.74 | 2.98 | 0.81 | 0.83 | 0.95 | 1.00 | 1.32 |
| Q96TA1 | Niban-like protein 1                        | FAM129B   | 692  | S | 0.995 | 261.7 | 1.10 | 1.15 | 1.07 | 0.80 | NaN  | 0.65 | 1.07 | 0.83 | 1.01 |
| Q96TA1 | Niban-like protein 1                        | FAM129B   | 696  | S | 1     | 211.3 | 2.65 | 2.71 | 2.92 | 2.59 | 2.49 | 2.64 | 1.31 | 1.28 | 1.32 |
| Q96TA1 | Niban-like protein 1                        | FAM129B   | 665  | S | 1     | 116.4 | 2.00 | 1.93 | 1.68 | 2.25 | 3.02 | 2.09 | 1.51 | 1.25 | 0.98 |
| Q96TA1 | Niban-like protein 1                        | FAM129B   | 681  | S | 1     | 112.7 | 2.00 | 1.93 | 1.68 | 2.25 | 3.02 | 2.09 | 0.95 | NaN  | 0.98 |
| Q96TA1 | Niban-like protein 1                        | FAM129B   | 638  | S | 1     | 107   | 2.91 | 3.29 | 3.57 | 3.45 | 4.21 | 4.98 | NaN  | NaN  | NaN  |
| Q96TA1 | Niban-like protein 1                        | FAM129B   | 641  | S | 1     | 147.2 | 3.43 | 3.54 | 3.10 | 2.70 | 4.21 | 2.82 | NaN  | NaN  | NaN  |
| Q96TA1 | Niban-like protein 1                        | FAM129B   | 646  | S | 0.998 | 147.2 | 3.43 | 3.54 | 3.10 | 2.70 | 4.21 | 2.82 | NaN  | NaN  | NaN  |
| Q99459 | Cell division cycle 5-like                  | CDC5L     | 303  | S | 1     | 157.3 | 1.32 | 2.11 | 2.07 | 1.62 | 1.84 | 1.75 | 2.65 | 2.42 | 2.85 |
| Q99523 | Sortilin                                    | SORT1     | 825  | S | 1     | 156   | 0.94 | 0.93 | NaN  | 0.72 | 0.80 | 0.68 | 0.82 | 0.73 | 0.76 |
| Q99549 | M-phase phosphoprotein 8                    | MPHOSP H8 | 164  | S | 1     | 51.61 | NaN  | 0.46 | NaN  | 0.47 | NaN  | 0.59 | 0.59 | 0.64 | 0.73 |
| Q99549 | M-phase phosphoprotein 8                    | MPHOSP H8 | 51   | S | 1     | 250   | 0.52 | 0.47 | NaN  | 0.71 | 0.58 | 0.46 | 0.63 | 0.58 | 0.79 |
| Q99549 | M-phase phosphoprotein 8                    | MPHOSP H8 | 403  | S | 0.929 | 120.3 | 0.56 | NaN  | NaN  | 0.57 | NaN  | 0.99 | 1.09 | 0.86 | NaN  |
| Q99549 | M-phase phosphoprotein 8                    | MPHOSP H8 | 85   | S | 0.964 | 166.2 | 0.44 | 0.37 | 0.38 | 0.54 | 0.45 | 0.50 | 0.61 | 0.58 | 0.65 |
| Q99567 | Nuclear pore complex protein Nup88          | NUP88     | 517  | S | 1     | 71.51 | 1.42 | 1.28 | NaN  | NaN  | NaN  | NaN  | NaN  | NaN  | NaN  |
| Q99567 | Nuclear pore complex protein Nup88          | NUP88     | 35   | S | 0.995 | 107   | NaN  | NaN  | NaN  | 2.01 | 1.65 | 1.42 | 1.58 | 1.64 | NaN  |
| Q99638 | Cell cycle checkpoint control protein RAD9A | RAD9A     | 375  | S | 0.675 | 40.76 | NaN  | NaN  | NaN  | NaN  | NaN  | 1.65 | 1.98 | 1.60 | 1.61 |
| Q99638 | Cell cycle checkpoint control protein RAD9A | RAD9A     | 380  | S | 0.674 | 40.76 | NaN  | NaN  | NaN  | NaN  | NaN  | 1.65 | 1.98 | 1.60 | 1.61 |
| Q99638 | Cell cycle checkpoint control protein RAD9A | RAD9A     | 387  | S | 1     | 112.7 | NaN  | NaN  | NaN  | NaN  | NaN  | 1.65 | 1.98 | 1.60 | 1.61 |
| Q99959 | Plakophilin-2                               | PKP2      | 151  | S | 1     | 97.42 | NaN  | NaN  | 1.10 | NaN  | 0.83 | 1.11 | 1.13 | 0.80 | 0.92 |
| Q99959 | Plakophilin-2                               | PKP2      | 154  | S | 0.823 | 97.42 | NaN  | NaN  | 1.10 | NaN  | NaN  | 1.11 | 1.13 | 0.80 | 0.92 |
| Q9BPX3 | Condensin complex subunit 3                 | NCAPG     | 975  | S | 1     | 167.3 | NaN  | NaN  | NaN  | 0.81 | 0.88 | 0.66 | NaN  | 0.72 | NaN  |
| Q9BPX3 | Condensin complex subunit 3                 | NCAPG     | 1015 | S | 1     | 151.7 | 1.41 | 1.33 | 1.23 | 1.31 | 1.43 | 1.14 | 1.06 | 1.09 | 1.15 |
| Q9BPX3 | Condensin complex subunit 3                 | NCAPG     | 674  | S | 1     | 376.2 | 0.82 | 0.71 | 0.93 | 0.85 | 0.86 | 0.97 | 0.94 | 0.93 | 0.93 |
| Q9BQG0 | Myb-binding protein 1A                      | MYBBP1    | 11   | S | 0.996 | 79.46 | 0.88 | NaN  | NaN  | NaN  | 1.18 | 1.33 | NaN  | NaN  | NaN  |
| Q9BQG0 | Myb-binding protein 1A                      | MYBBP1    | 1163 | S | 0.961 | 112.6 | 0.87 | 0.86 | 0.88 | 1.41 | 1.50 | NaN  | 0.66 | 0.66 | 0.63 |
| Q9BRD0 | BUD13 homolog                               | BUD13     | 357  | S | 0.731 | 147.2 | 0.71 | 0.79 | NaN  | 0.81 | 0.80 | NaN  | 0.94 | 0.98 | 0.84 |
| Q9BRD0 | BUD13 homolog                               | BUD13     | 197  | S | 1     | 70.09 | NaN  | 0.82 | 0.90 | 0.88 | 0.87 | 0.95 | 0.99 | 0.98 | 1.04 |
| Q9BRD0 | BUD13 homolog                               | BUD13     | 201  | S | 1     | 70.09 | NaN  | 0.82 | 0.90 | 0.88 | 0.87 | 0.95 | 0.99 | 0.98 | 1.04 |

|        |                                             |          |      |   |       |       |      |      |      |      |      |      |      |      |      |
|--------|---------------------------------------------|----------|------|---|-------|-------|------|------|------|------|------|------|------|------|------|
| Q9BRD0 | BUD13 homolog                               | BUD13    | 163  | S | 1     | 58.78 | 1.42 | 1.92 | NaN  | NaN  | NaN  | NaN  | 2.23 | 2.11 | NaN  |
| Q9BRD0 | BUD13 homolog                               | BUD13    | 139  | S | 1     | 71.56 | 1.47 | NaN  | 1.90 | NaN  | NaN  | NaN  | 1.76 | NaN  | NaN  |
| Q9BRD0 | BUD13 homolog                               | BUD13    | 325  | S | 1     | 115.6 | 0.89 | 0.79 | NaN  | 0.86 | 0.78 | 0.89 | 1.17 | 0.99 | NaN  |
| Q9BRG2 | SH2 domain-containing protein 3A            | SH2D3A   | 180  | S | 0.992 | 92.61 | NaN  | NaN  | 0.39 | 0.60 | NaN  | NaN  | 0.99 | 0.98 | NaN  |
| Q9BRL6 | Serine/arginine-rich splicing factor 8      | SRSF8    | 273  | S | 1     | 71.47 | NaN  | 1.18 | 1.95 | 2.55 | 2.17 | NaN  | 1.75 | 1.98 | 1.59 |
| Q9BRL6 | Serine/arginine-rich splicing factor 8      | SRSF8    | 282  | S | 0.756 | 71.47 | NaN  | 1.18 | 1.95 | 2.55 | 2.17 | NaN  | 1.75 | 1.98 | 1.59 |
| Q9BRQ0 | Pygopus homolog 2                           | PYGO2    | 40   | S | 1     | 55.11 | 0.97 | 1.25 | 0.85 | NaN  | 1.21 | 1.54 | 0.48 | 0.46 | NaN  |
| Q9BRS8 | La-related protein 6                        | LARP6    | 447  | S | 0.829 | 57.15 | NaN  | NaN  | NaN  | NaN  | NaN  | NaN  | 1.48 | 1.76 | 1.74 |
| Q9BSJ8 | Extended synaptotagmin-1                    | ESYT1    | 1034 | S | 1     | 107.1 | NaN  | NaN  | NaN  | 0.95 | 0.92 | NaN  | 1.07 | 1.16 | 1.41 |
| Q9BTC0 | Death-inducer obliterator 1                 | DIDO1    | 1260 | S | 0.984 | 60.66 | NaN  | 0.85 | 1.25 | 1.11 | 1.40 | 1.24 | 0.75 | NaN  | NaN  |
| Q9BTC0 | Death-inducer obliterator 1                 | DIDO1    | 1456 | S | 1     | 76.35 | NaN  | 1.94 | NaN  | 1.70 | 1.80 | 1.76 | NaN  | 1.85 | NaN  |
| Q9BTC0 | Death-inducer obliterator 1                 | DIDO1    | 1713 | S | 0.519 | 61.94 | NaN  | NaN  | NaN  | 0.72 | 1.12 | NaN  | NaN  | 1.04 | NaN  |
| Q9BTC0 | Death-inducer obliterator 1                 | DIDO1    | 1714 | S | 0.831 | 82.54 | 1.11 | 1.03 | 0.86 | NaN  | NaN  | 0.94 | 1.24 | NaN  | 1.03 |
| Q9BTU6 | Phosphatidylinositol 4-kinase type 2-alpha  | PI4K2A   | 44   | S | 0.536 | 66.36 | NaN  | 0.53 | NaN  | NaN  | 0.96 | 1.49 | NaN  | NaN  | NaN  |
| Q9BTU6 | Phosphatidylinositol 4-kinase type 2-alpha  | PI4K2A   | 47   | S | 1     | 178.1 | 1.39 | 1.34 | 1.71 | 1.79 | 0.60 | 0.60 | 0.99 | 0.97 | 1.06 |
| Q9BTU6 | Phosphatidylinositol 4-kinase type 2-alpha  | PI4K2A   | 51   | S | 1     | 178.1 | 1.39 | 1.34 | 1.35 | 1.79 | 1.01 | 1.32 | 1.30 | 1.61 | 1.28 |
| Q9BU76 | Multiple myeloma tumor-associated protein 2 | MMTAG2   | 220  | S | 0.937 | 88.78 | NaN  | NaN  | NaN  | 0.68 | 0.60 | NaN  | 0.65 | 0.71 | NaN  |
| Q9BUA3 | Uncharacterized protein C11orf84            | C11orf84 | 308  | S | 1     | 134.6 | 1.27 | 1.19 | NaN  | 1.11 | 1.15 | NaN  | 1.30 | 1.32 | 1.25 |
| Q9BUA3 | Uncharacterized protein C11orf84            | C11orf84 | 248  | S | 1     | 106.1 | 1.20 | 0.85 | 1.07 | 0.76 | NaN  | 0.95 | NaN  | NaN  | 1.18 |
| Q9BUA3 | Uncharacterized protein C11orf84            | C11orf84 | 251  | S | 0.97  | 106.1 | 1.20 | 2.58 | 1.07 | 0.76 | NaN  | 0.95 | NaN  | NaN  | 1.18 |
| Q9BUH6 | Protein PAXX                                | C9orf142 | 148  | S | 1     | 222.6 | 1.39 | 1.29 | 1.51 | 1.42 | 1.46 | 1.55 | 1.07 | 1.10 | 0.95 |
| Q9BV36 | Melanophilin                                | MLPH     | 266  | S | 0.872 | 200.4 | 2.63 | 1.42 | NaN  | 3.10 | 2.02 | NaN  | NaN  | NaN  | NaN  |
| Q9BVG4 | Protein PBDC1                               | PBDC1    | 197  | S | 1     | 132   | 0.91 | 1.06 | 0.82 | 0.94 | 0.96 | 0.90 | 0.92 | 0.95 | 0.97 |
| Q9BVV8 | Uncharacterized membrane protein C19orf24   | C19orf24 | 117  | S | 0.998 | 128.9 | 1.19 | 1.13 | 0.57 | NaN  | 1.65 | 1.62 | NaN  | NaN  | NaN  |
| Q9BVV8 | Uncharacterized membrane protein C19orf24   | C19orf24 | 120  | S | 0.999 | 128.9 | 1.19 | 1.13 | NaN  | NaN  | 1.65 | 1.62 | NaN  | NaN  | NaN  |
| Q9BW61 | DET1- and DDB1-associated protein 1         | DDA1     | 95   | S | 1     | 101.1 | 0.43 | 0.38 | 0.41 | 0.55 | 0.44 | 0.44 | 0.65 | 0.77 | 0.69 |
| Q9BW71 | HIRA-interacting protein 3                  | HIRIP3   | 159  | S | 1     | 46.07 | NaN  | NaN  | NaN  | NaN  | 0.90 | NaN  | NaN  | 0.96 | 0.93 |
| Q9BW71 | HIRA-interacting protein 3                  | HIRIP3   | 160  | S | 1     | 46.07 | NaN  | NaN  | NaN  | NaN  | 0.90 | NaN  | NaN  | 0.96 | 0.93 |
| Q9BW71 | HIRA-interacting protein 3                  | HIRIP3   | 196  | S | 1     | 289.4 | 0.59 | 0.58 | NaN  | NaN  | NaN  | 0.62 | NaN  | NaN  | 0.88 |
| Q9BW85 | Coiled-coil domain-containing protein 94    | CCDC94   | 211  | S | 1     | 144.9 | 0.86 | 0.81 | 0.68 | 0.83 | 0.80 | 0.74 | 0.88 | 0.86 | 0.85 |
| Q9BW85 | Coiled-coil domain-containing protein 94    | CCDC94   | 213  | S | 1     | 144.9 | 0.86 | 0.81 | 0.68 | 0.83 | 0.80 | 0.74 | 0.88 | 0.86 | 0.85 |

|        |                                             |          |      |   |       |       |      |      |      |      |      |      |      |      |      |
|--------|---------------------------------------------|----------|------|---|-------|-------|------|------|------|------|------|------|------|------|------|
| Q9BX95 | Sphingosine-1-phosphate phosphatase 1       | SGPP1    | 112  | S | 0.994 | 77.05 | 1.04 | 0.72 | NaN  | NaN  | NaN  | NaN  | 1.05 | 0.89 | NaN  |
| Q9BXP5 | Serrate RNA effector molecule homolog       | SRRT     | 67   | S | 1     | 107   | 1.04 | 1.16 | 1.01 | 0.97 | 0.97 | 0.90 | 1.22 | 1.20 | 1.11 |
| Q9BXP5 | Serrate RNA effector molecule homolog       | SRRT     | 74   | S | 1     | 118.3 | 1.19 | 1.14 | 1.22 | 1.15 | 1.20 | 1.10 | 1.25 | 1.34 | 1.22 |
| Q9BXW6 | Oxysterol-binding protein-related protein 1 | OSBPL1A  | 499  | S | 1     | 42.32 | 1.18 | 0.80 | NaN  | NaN  | NaN  | NaN  | NaN  | NaN  | NaN  |
| Q9BY89 | Uncharacterized protein KIAA1671            | KIAA1671 | 1701 | S | 1     | 99.71 | 0.66 | 0.65 | NaN  | 0.74 | 0.68 | NaN  | 0.88 | 0.95 | NaN  |
| Q9BY89 | Uncharacterized protein KIAA1671            | KIAA1671 | 1019 | S | 1     | 84.9  | 0.98 | 0.91 | 0.99 | 1.10 | 1.16 | 1.14 | 0.98 | 0.96 | 0.80 |
| Q9BY89 | Uncharacterized protein KIAA1671            | KIAA1671 | 1363 | S | 0.557 | 58.37 | NaN  | NaN  | NaN  | 1.20 | NaN  | 0.88 | 1.15 | 0.94 | 0.76 |
| Q9BY89 | Uncharacterized protein KIAA1671            | KIAA1671 | 1366 | S | 0.832 | 54.2  | 0.74 | 0.84 | NaN  | NaN  | 1.04 | NaN  | 0.96 | 0.85 | 1.01 |
| Q9BYW2 | Histone-lysine N-methyltransferase SETD2    | SETD2    | 624  | S | 0.951 | 57.79 | NaN  | 0.86 | NaN  | 1.60 | NaN  | 1.30 | 1.40 | NaN  | 1.38 |
| Q9BYX2 | TBC1 domain family member 2A                | TBC1D2   | 920  | S | 1     | 145.6 | 0.75 | 0.87 | 0.88 | 0.75 | 0.75 | 0.78 | 1.18 | 1.06 | 1.09 |
| Q9BZF1 | Oxysterol-binding protein-related protein 8 | OSBPL8   | 807  | S | 0.998 | 160.8 | 0.84 | 0.75 | 0.76 | 0.72 | 0.73 | 0.65 | 0.92 | 1.10 | 0.92 |
| Q9BZF1 | Oxysterol-binding protein-related protein 8 | OSBPL8   | 808  | S | 0.999 | 160.8 | 0.84 | 0.75 | 0.76 | 0.72 | NaN  | 0.65 | 0.92 | 1.10 | 0.92 |
| Q9BZF1 | Oxysterol-binding protein-related protein 8 | OSBPL8   | 810  | S | 0.997 | 81.97 | 1.49 | 1.17 | 1.06 | NaN  | 0.73 | NaN  | 1.91 | NaN  | NaN  |
| Q9BZH6 | WD repeat-containing protein 11             | WDR11    | 208  | S | 0.857 | 143.8 | NaN  | NaN  | NaN  | NaN  | NaN  | NaN  | 1.04 | 0.91 | NaN  |
| Q9BZQ8 | Protein Niban                               | FAM129A  | 622  | S | 1     | 178.3 | 0.59 | 0.92 | 0.90 | 0.68 | NaN  | NaN  | 0.91 | 0.84 | NaN  |
| Q9BZQ8 | Protein Niban                               | FAM129A  | 926  | S | 1     | 102.6 | 1.75 | 1.65 | NaN  | NaN  | NaN  | NaN  | NaN  | NaN  | NaN  |
| Q9BZQ8 | Protein Niban                               | FAM129A  | 646  | S | 1     | 98.15 | 1.48 | 1.72 | NaN  | NaN  | 2.24 | NaN  | 1.12 | NaN  | NaN  |
| Q9C0B5 | Palmitoyltransferase ZDHHC5                 | ZDHHC5   | 529  | S | 0.831 | 66.87 | 1.61 | NaN  | NaN  | 1.24 | 1.30 | NaN  | NaN  | NaN  | 1.18 |
| Q9C0C2 | 182 kDa tankyrase-1-binding protein         | TNKS1BP1 | 672  | S | 1     | 195.4 | 1.26 | 1.28 | 1.22 | 1.17 | 1.06 | 1.13 | 1.48 | 1.41 | 1.37 |
| Q9C0C2 | 182 kDa tankyrase-1-binding protein         | TNKS1BP1 | 1620 | S | 1     | 171.8 | 1.02 | 1.11 | 1.10 | 0.99 | 1.03 | 1.01 | 1.25 | 1.24 | 1.20 |
| Q9C0C2 | 182 kDa tankyrase-1-binding protein         | TNKS1BP1 | 1621 | S | 1     | 171.8 | 1.02 | 1.11 | 1.10 | 0.99 | 1.03 | 1.01 | 1.25 | 1.24 | 1.20 |
| Q9C0C2 | 182 kDa tankyrase-1-binding protein         | TNKS1BP1 | 1024 | S | 0.999 | 77.4  | NaN  | 1.16 | 1.49 | NaN  | NaN  | NaN  | 1.35 | 1.66 | NaN  |
| Q9C0C2 | 182 kDa tankyrase-1-binding protein         | TNKS1BP1 | 494  | S | 1     | 224.6 | 0.69 | 0.77 | 0.85 | 0.77 | 1.39 | 2.00 | 1.85 | NaN  | 1.06 |
| Q9C0C2 | 182 kDa tankyrase-1-binding protein         | TNKS1BP1 | 498  | S | 0.999 | 224.6 | 1.81 | 1.56 | 1.97 | 1.57 | NaN  | 2.00 | 1.85 | 0.93 | 2.40 |
| Q9C0C2 | 182 kDa tankyrase-1-binding protein         | TNKS1BP1 | 1666 | S | 1     | 85.29 | 0.68 | 0.69 | NaN  | 0.68 | 0.92 | 1.27 | NaN  | 1.22 | 1.24 |

|        |                                                                   |          |      |   |       |       |      |      |      |      |      |      |      |      |      |
|--------|-------------------------------------------------------------------|----------|------|---|-------|-------|------|------|------|------|------|------|------|------|------|
| Q9C0C2 | 182 kDa tankyrase-1-binding protein                               | TNKS1BP1 | 987  | S | 0.962 | 202   | 2.98 | 2.94 | NaN  | 3.39 | NaN  | NaN  | NaN  | NaN  | NaN  |
| Q9C0C2 | 182 kDa tankyrase-1-binding protein                               | TNKS1BP1 | 1554 | S | 0.719 | 145.9 | NaN  | 1.16 | 2.47 | NaN  | NaN  | NaN  | NaN  | NaN  | NaN  |
| Q9C0C2 | 182 kDa tankyrase-1-binding protein                               | TNKS1BP1 | 836  | S | 1     | 148.7 | 3.52 | 3.78 | 3.96 | 2.50 | 2.46 | 2.44 | 2.32 | 2.60 | 2.67 |
| Q9C0C2 | 182 kDa tankyrase-1-binding protein                               | TNKS1BP1 | 1138 | S | 0.921 | 79.28 | 1.39 | 1.40 | NaN  | NaN  | 2.11 | NaN  | 1.06 | 1.24 | NaN  |
| Q9C0C2 | 182 kDa tankyrase-1-binding protein                               | TNKS1BP1 | 601  | S | 1     | 185   | 1.60 | 1.85 | NaN  | 1.40 | 1.62 | 1.56 | 1.27 | 1.37 | 1.50 |
| Q9C0C9 | E2/E3 hybrid ubiquitin-protein ligase UBE2O                       | UBE2O    | 87   | S | 1     | 180.1 | 0.58 | 0.62 | 0.63 | 0.87 | 0.85 | 0.71 | 0.79 | 0.75 | 0.81 |
| Q9C0C9 | E2/E3 hybrid ubiquitin-protein ligase UBE2O                       | UBE2O    | 89   | S | 1     | 180.1 | 0.58 | 0.62 | 0.63 | 0.87 | 0.85 | 0.71 | 0.79 | 0.75 | 0.81 |
| Q9C0C9 | E2/E3 hybrid ubiquitin-protein ligase UBE2O                       | UBE2O    | 836  | S | 0.919 | 103.9 | 1.34 | 0.88 | 0.72 | 1.53 | 1.52 | 1.15 | NaN  | NaN  | NaN  |
| Q9C0C9 | E2/E3 hybrid ubiquitin-protein ligase UBE2O                       | UBE2O    | 839  | S | 0.786 | 224.5 | 0.87 | 0.74 | 1.06 | 1.17 | NaN  | 1.37 | 0.54 | 0.81 | 0.75 |
| Q9GZP8 | Immortalization up-regulated protein                              | IMUP     | 29   | S | 1     | 91.47 | 0.99 | 1.07 | 1.08 | 1.09 | 1.13 | 1.04 | 1.06 | 1.06 | 1.13 |
| Q9H0D6 | 5'-3' exoribonuclease 2                                           | XRN2     | 499  | S | 1     | 186.6 | 0.72 | 0.40 | 0.72 | 0.60 | 0.55 | 0.72 | 0.80 | 0.76 | 0.92 |
| Q9H0D6 | 5'-3' exoribonuclease 2                                           | XRN2     | 501  | S | 1     | 217.7 | 0.72 | 0.76 | 0.79 | 0.75 | 0.78 | 0.72 | 0.90 | 0.99 | 0.92 |
| Q9H0D6 | 5'-3' exoribonuclease 2                                           | XRN2     | 448  | S | 1     | 87.88 | 1.00 | 1.52 | NaN  | 1.75 | 1.78 | 1.78 | 0.94 | 1.11 | 1.07 |
| Q9H0G5 | Nuclear speckle splicing regulatory protein 1                     | NSRP1    | 33   | S | 1     | 167   | 1.09 | 1.00 | NaN  | NaN  | NaN  | NaN  | 1.20 | NaN  | 1.80 |
| Q9H1B7 | Interferon regulatory factor 2-binding protein-like               | IRF2BPL  | 547  | S | 1     | 90.82 | 0.78 | 0.87 | 0.78 | 0.73 | 0.66 | 0.78 | 1.37 | 1.33 | 1.43 |
| Q9H1E3 | Nuclear ubiquitous casein and cyclin-dependent kinase substrate 1 | NUCKS1   | 181  | S | 1     | 198.5 | 2.75 | 2.68 | 2.59 | 2.88 | 3.22 | 2.72 | 1.16 | 1.14 | 1.16 |
| Q9H1E3 | Nuclear ubiquitous casein and cyclin-dependent kinase substrate 1 | NUCKS1   | 73   | S | 1     | 89.68 | 1.17 | 1.07 | NaN  | NaN  | NaN  | 1.01 | NaN  | NaN  | NaN  |
| Q9H1E3 | Nuclear ubiquitous casein and cyclin-dependent kinase substrate 1 | NUCKS1   | 75   | S | 1     | 163.1 | 0.29 | 0.34 | 1.03 | 1.01 | 1.02 | 1.11 | 0.59 | 0.53 | 1.06 |
| Q9H1E3 | Nuclear ubiquitous casein and cyclin-dependent kinase substrate 1 | NUCKS1   | 79   | S | 1     | 170.3 | 0.32 | 0.30 | 0.31 | 1.01 | 1.02 | 1.05 | 0.49 | 0.46 | 1.06 |
| Q9H1E3 | Nuclear ubiquitous casein and cyclin-dependent kinase substrate 1 | NUCKS1   | 214  | S | 1     | 271.5 | 0.74 | 0.75 | 0.69 | 0.75 | 0.76 | 0.72 | 0.90 | 0.91 | 0.89 |
| Q9H1E3 | Nuclear ubiquitous casein and cyclin-dependent kinase substrate 1 | NUCKS1   | 204  | S | 1     | 144.7 | 0.92 | 1.23 | 1.27 | 1.07 | 0.89 | 1.17 | 0.96 | 1.03 | 1.37 |

|        |                                                                   |          |     |   |       |       |      |      |      |      |      |      |      |      |      |
|--------|-------------------------------------------------------------------|----------|-----|---|-------|-------|------|------|------|------|------|------|------|------|------|
| Q9H1E3 | Nuclear ubiquitous casein and cyclin-dependent kinase substrate 1 | NUCKS1   | 113 | S | 1     | 162.2 | NaN  | NaN  | 0.29 | 0.36 | 0.31 | 0.27 | 0.22 | 0.26 | 0.25 |
| Q9H1E3 | Nuclear ubiquitous casein and cyclin-dependent kinase substrate 1 | NUCKS1   | 19  | S | 1     | 349   | 1.19 | 1.18 | 1.15 | 1.10 | 1.08 | 1.08 | 1.16 | 1.18 | 1.19 |
| Q9H1E3 | Nuclear ubiquitous casein and cyclin-dependent kinase substrate 1 | NUCKS1   | 54  | S | 0.998 | 159   | 0.92 | 0.65 | 0.99 | 0.69 | 0.81 | 1.02 | 0.57 | 0.98 | 0.85 |
| Q9H1E3 | Nuclear ubiquitous casein and cyclin-dependent kinase substrate 1 | NUCKS1   | 58  | S | 1     | 187   | 0.68 | 0.85 | 0.74 | 0.88 | 0.70 | 0.70 | 0.98 | 0.62 | 0.84 |
| Q9H1E3 | Nuclear ubiquitous casein and cyclin-dependent kinase substrate 1 | NUCKS1   | 61  | S | 1     | 228.6 | 0.63 | 0.67 | 0.62 | 0.70 | 0.71 | 0.87 | 0.83 | 0.94 | 0.99 |
| Q9H1E3 | Nuclear ubiquitous casein and cyclin-dependent kinase substrate 1 | NUCKS1   | 50  | S | 0.547 | 63.48 | 0.76 | 0.85 | NaN  | NaN  | 0.97 | NaN  | NaN  | NaN  | NaN  |
| Q9H1E3 | Nuclear ubiquitous casein and cyclin-dependent kinase substrate 1 | NUCKS1   | 223 | S | 1     | 150.2 | 0.32 | 0.35 | 0.36 | 0.39 | 0.38 | 0.39 | 0.47 | 0.47 | 0.49 |
| Q9H246 | Uncharacterized protein C1orf21                                   | C1orf21  | 115 | S | 0.999 | 65.09 | NaN  | NaN  | NaN  | 1.19 | 1.01 | 0.93 | 1.13 | 1.05 | NaN  |
| Q9H307 | Pinin                                                             | PNN      | 375 | S | 0.954 | 104.3 | NaN  | NaN  | 0.87 | 1.32 | 1.10 | 1.18 | 0.54 | 0.55 | 0.48 |
| Q9H307 | Pinin                                                             | PNN      | 381 | S | 1     | 224.6 | 0.88 | 0.89 | 0.75 | 1.19 | 1.18 | 0.99 | 0.57 | 0.56 | 0.55 |
| Q9H307 | Pinin                                                             | PNN      | 100 | S | 1     | 209.1 | 0.87 | 0.89 | 0.96 | 0.93 | 0.95 | 0.92 | 0.95 | 0.91 | 0.96 |
| Q9H330 | Transmembrane protein 245                                         | TMEM245  | 332 | S | 0.638 | 121.1 | NaN  | NaN  | NaN  | NaN  | 0.99 | NaN  | 1.25 | 1.26 | NaN  |
| Q9H3N1 | Thioredoxin-related transmembrane protein 1                       | TMX1     | 247 | S | 1     | 302   | 1.15 | 1.07 | 1.10 | 0.95 | 0.91 | 1.05 | 1.05 | 0.99 | 1.15 |
| Q9H3Q1 | Cdc42 effector protein 4                                          | CDC42EP4 | 141 | S | 0.733 | 84.31 | 0.75 | NaN  | NaN  | 0.89 | NaN  | 0.86 | NaN  | NaN  | NaN  |
| Q9H3Q1 | Cdc42 effector protein 4                                          | CDC42EP4 | 142 | S | 0.788 | 91.96 | NaN  | 0.78 | 0.81 | NaN  | 0.89 | NaN  | 0.51 | 0.53 | 0.52 |
| Q9H3Z4 | DnaJ homolog subfamily C member 5                                 | DNAJC5   | 10  | S | 0.999 | 429.1 | 1.18 | 1.24 | 1.20 | 0.99 | 0.98 | 0.99 | 1.01 | 0.89 | 1.01 |
| Q9H4L5 | Oxysterol-binding protein-related protein 3                       | OSBPL3   | 437 | S | 1     | 159.5 | 1.52 | 1.14 | NaN  | NaN  | NaN  | 6.56 | NaN  | 1.20 | NaN  |
| Q9H4L5 | Oxysterol-binding protein-related protein 3                       | OSBPL3   | 410 | S | 1     | 117   | 0.93 | 1.01 | 0.96 | 1.55 | 1.37 | 1.39 | 0.85 | 0.87 | 1.06 |
| Q9H4L5 | Oxysterol-binding protein-related protein 3                       | OSBPL3   | 304 | S | 0.959 | 127.6 | 1.13 | 1.05 | NaN  | NaN  | 1.02 | NaN  | NaN  | NaN  | NaN  |
| Q9H4L5 | Oxysterol-binding protein-related protein 3                       | OSBPL3   | 34  | S | 1     | 94.72 | 1.57 | 1.90 | 1.67 | 1.41 | 1.28 | NaN  | 1.37 | 1.56 | 1.56 |
| Q9H4L5 | Oxysterol-binding protein-related protein 3                       | OSBPL3   | 372 | S | 0.963 | 322.4 | 0.70 | 0.69 | 0.67 | 1.31 | 1.33 | 1.37 | 0.57 | 0.68 | 0.69 |
| Q9H4L5 | Oxysterol-binding protein-related protein 3                       | OSBPL3   | 262 | S | 0.706 | 122.4 | NaN  | 1.17 | 0.98 | 1.79 | NaN  | 1.60 | 0.62 | NaN  | 1.23 |



|        |                                                             |        |      |   |       |       |      |      |      |      |      |      |      |      |      |
|--------|-------------------------------------------------------------|--------|------|---|-------|-------|------|------|------|------|------|------|------|------|------|
| Q9H4L5 | Oxysterol-binding protein-related protein 3                 | OSBPL3 | 265  | S | 0.995 | 142.5 | 1.16 | 1.13 | NaN  | 1.27 | 1.85 | NaN  | NaN  | 0.65 | 0.69 |
| Q9H501 | ESF1 homolog                                                | ESF1   | 657  | S | 1     | 140.6 | 0.86 | 0.94 | 0.99 | 0.98 | 0.97 | 1.13 | 0.80 | 0.82 | 0.78 |
| Q9H501 | ESF1 homolog                                                | ESF1   | 663  | S | 1     | 134.6 | 1.24 | 0.80 | NaN  | 1.11 | 1.26 | 1.18 | 1.41 | 1.65 | 1.31 |
| Q9H501 | ESF1 homolog                                                | ESF1   | 153  | S | 1     | 110.4 | 1.02 | 0.96 | 0.90 | 1.15 | 1.26 | 1.17 | 0.48 | 0.70 | 0.53 |
| Q9H501 | ESF1 homolog                                                | ESF1   | 198  | S | 0.989 | 68.42 | 0.77 | 1.23 | NaN  | 1.88 | NaN  | NaN  | NaN  | NaN  | NaN  |
| Q9H6F5 | Coiled-coil domain-containing protein 86                    | CCDC86 | 58   | S | 1     | 93.65 | 1.21 | 1.46 | 1.36 | 1.58 | 1.58 | 1.61 | 0.68 | 0.70 | 0.70 |
| Q9H6F5 | Coiled-coil domain-containing protein 86                    | CCDC86 | 66   | S | 0.668 | 64.04 | 0.74 | 0.65 | 0.62 | 0.77 | 0.74 | NaN  | NaN  | NaN  | 0.80 |
| Q9H6F5 | Coiled-coil domain-containing protein 86                    | CCDC86 | 69   | S | 1     | 111.6 | 1.19 | 0.65 | 0.62 | 0.77 | 0.74 | 0.83 | 0.98 | NaN  | 0.71 |
| Q9H6F5 | Coiled-coil domain-containing protein 86                    | CCDC86 | 47   | S | 1     | 319.2 | 1.12 | 1.12 | 1.11 | 1.14 | 1.15 | 1.11 | 0.95 | 0.99 | 0.95 |
| Q9H6F5 | Coiled-coil domain-containing protein 86                    | CCDC86 | 18   | S | 0.999 | 88.68 | 1.55 | 1.43 | 1.78 | NaN  | 1.21 | 1.46 | 1.62 | 1.39 | 1.35 |
| Q9H6F5 | Coiled-coil domain-containing protein 86                    | CCDC86 | 91   | S | 1     | 331.6 | 1.04 | 1.07 | 1.14 | 1.15 | 1.08 | 1.07 | 1.07 | 0.94 | 1.13 |
| Q9H6F5 | Coiled-coil domain-containing protein 86                    | CCDC86 | 102  | S | 1     | 110.2 | 0.86 | NaN  | 0.86 | NaN  | 1.59 | NaN  | 1.08 | 1.03 | NaN  |
| Q9H6F5 | Coiled-coil domain-containing protein 86                    | CCDC86 | 110  | S | 0.97  | 94.15 | 0.80 | NaN  | 0.86 | NaN  | 1.59 | 0.92 | 1.08 | 1.03 | NaN  |
| Q9H6F5 | Coiled-coil domain-containing protein 86                    | CCDC86 | 113  | S | 0.998 | 70.63 | NaN  | 1.00 | 0.86 | NaN  | 0.92 | NaN  | 1.08 | 1.08 | 1.08 |
| Q9H6X2 | Anthrax toxin receptor 1                                    | ANTXR1 | 362  | S | 1     | 173.6 | 0.85 | NaN  | 0.86 | 0.89 | 0.89 | 0.87 | 1.03 | 0.91 | 1.13 |
| Q9H7D0 | Dedicator of cytokinesis protein 5                          | DOCK5  | 1789 | S | 0.985 | 47.43 | 1.53 | NaN  | 1.12 | NaN  | 1.02 | NaN  | NaN  | 1.08 | NaN  |
| Q9H7D0 | Dedicator of cytokinesis protein 5                          | DOCK5  | 1756 | S | 0.93  | 103.4 | NaN  | NaN  | 1.23 | 1.86 | NaN  | 1.26 | NaN  | NaN  | NaN  |
| Q9H7L9 | Sin3 histone deacetylase corepressor complex component SDS3 | SUDS3  | 234  | S | 0.985 | 125.4 | 0.83 | 0.90 | NaN  | 0.65 | 0.79 | NaN  | NaN  | 0.89 | 1.04 |
| Q9H7N4 | Splicing factor, arginine/serine-rich 19                    | SCAF1  | 734  | S | 1     | 116.8 | 1.41 | 1.63 | 1.20 | 1.13 | 1.03 | 1.44 | 1.15 | 1.14 | 1.71 |
| Q9H7N4 | Splicing factor, arginine/serine-rich 19                    | SCAF1  | 738  | S | 1     | 116.8 | 1.41 | 1.63 | 1.20 | 1.13 | 1.03 | 1.44 | 1.15 | 1.14 | 1.71 |
| Q9H7N4 | Splicing factor, arginine/serine-rich 19                    | SCAF1  | 239  | S | 1     | 156   | 0.82 | 0.84 | 0.85 | 0.82 | 0.87 | 0.93 | 1.02 | 0.86 | 0.78 |
| Q9H7N4 | Splicing factor, arginine/serine-rich 19                    | SCAF1  | 963  | S | 0.982 | 175.2 | 1.09 | 0.88 | NaN  | NaN  | 1.13 | 1.13 | NaN  | 0.87 | NaN  |
| Q9H7N4 | Splicing factor, arginine/serine-rich 19                    | SCAF1  | 724  | S | 0.937 | 97.75 | NaN  | 0.57 | 0.61 | 0.53 | 0.85 | NaN  | 0.70 | 0.61 | 0.64 |
| Q9H7N4 | Splicing factor, arginine/serine-rich 19                    | SCAF1  | 725  | S | 0.894 | 97.75 | NaN  | 0.51 | 0.61 | 0.30 | NaN  | NaN  | 0.70 | 0.52 | 0.64 |
| Q9H7N4 | Splicing factor, arginine/serine-rich 19                    | SCAF1  | 498  | S | 1     | 136.3 | 1.09 | 1.20 | 1.21 | 1.16 | 1.20 | 1.07 | 1.36 | 1.30 | 1.18 |

|        |                                                             |         |      |   |       |       |      |      |      |      |      |      |      |      |      |
|--------|-------------------------------------------------------------|---------|------|---|-------|-------|------|------|------|------|------|------|------|------|------|
| Q9H7N4 | Splicing factor, arginine/serine-rich 19                    | SCAF1   | 500  | S | 1     | 136.3 | 1.09 | 1.20 | 1.21 | 1.16 | 1.20 | 1.07 | 1.36 | 1.30 | 1.18 |
| Q9H7N4 | Splicing factor, arginine/serine-rich 19                    | SCAF1   | 612  | S | 1     | 51.76 | NaN  | NaN  | NaN  | 0.91 | 0.90 | NaN  | 0.92 | NaN  | 0.88 |
| Q9H7N4 | Splicing factor, arginine/serine-rich 19                    | SCAF1   | 614  | S | 1     | 51.76 | NaN  | NaN  | NaN  | 0.91 | 0.90 | NaN  | 0.92 | NaN  | 0.88 |
| Q9H8G2 | Caspase activity and apoptosis inhibitor 1                  | CAAP1   | 203  | S | 1     | 97.77 | 0.59 | 0.64 | 0.63 | 0.98 | 0.94 | 0.91 | 0.93 | 1.13 | 0.38 |
| Q9H8G2 | Caspase activity and apoptosis inhibitor 1                  | CAAP1   | 312  | S | 0.909 | 88.18 | 1.05 | 1.26 | NaN  | NaN  | 1.61 | 1.69 | NaN  | 1.39 | 1.12 |
| Q9H8M2 | Bromodomain-containing protein 9                            | BRD9    | 588  | S | 1     | 143.6 | 0.88 | 0.66 | NaN  | 0.99 | 0.78 | 0.66 | 1.04 | 0.83 | 0.79 |
| Q9H8Y8 | Golgi reassembly-stacking protein 2                         | GORASP2 | 451  | S | 1     | 122.7 | 0.72 | 0.88 | 0.86 | 1.24 | 1.18 | 1.39 | 1.00 | 0.99 | 0.99 |
| Q9HA65 | TBC1 domain family member                                   | TBC1D17 | 602  | S | 0.997 | 161.7 | 1.31 | 0.85 | 2.02 | NaN  | NaN  | NaN  | 1.03 | 1.57 | 1.32 |
| Q9HA65 | TBC1 domain family member                                   | TBC1D17 | 604  | S | 0.928 | 161.7 | 1.31 | 0.85 | 2.02 | NaN  | NaN  | NaN  | 1.03 | 1.57 | 1.32 |
| Q9HA65 | TBC1 domain family member                                   | TBC1D17 | 613  | S | 0.88  | 127.3 | NaN  | 0.85 | 2.02 | NaN  | NaN  | NaN  | 0.65 | 1.42 | NaN  |
| Q9HCD6 | Protein TANC2                                               | TANC2   | 169  | S | 0.986 | 228.5 | 0.87 | 1.19 | NaN  | 1.34 | 1.41 | 1.25 | 1.29 | 1.13 | NaN  |
| Q9HCD6 | Protein TANC2                                               | TANC2   | 1579 | S | 0.93  | 75.33 | 1.27 | 1.51 | NaN  | 1.47 | 1.20 | NaN  | NaN  | 1.51 | 1.37 |
| Q9HCE5 | N6-adenosine-methyltransferase subunit                      | METTL14 | 399  | S | 1     | 77.59 | 0.56 | NaN  | 0.57 | 0.70 | NaN  | 0.69 | 0.88 | NaN  | 0.84 |
| Q9HCN4 | METTL14                                                     |         |      |   |       |       |      |      |      |      |      |      |      |      |      |
| Q9HCN4 | GPN-loop GTPase 1                                           | GPN1    | 314  | S | 0.996 | 90.56 | 1.31 | 1.56 | 1.13 | 1.40 | 1.29 | 1.37 | 0.89 | 0.90 | NaN  |
| Q9NQC3 | Reticulon-4                                                 | RTN4    | 181  | S | 0.807 | 114.5 | 0.48 | 1.07 | 0.94 | 1.01 | 0.89 | 0.98 | 1.19 | 0.80 | NaN  |
| Q9NQC3 | Reticulon-4                                                 | RTN4    | 182  | S | 0.808 | 115.1 | 1.00 | 1.07 | 0.94 | 1.01 | 0.89 | 0.98 | 1.14 | 0.80 | NaN  |
| Q9NQC3 | Reticulon-4                                                 | RTN4    | 184  | S | 0.837 | 115.1 | 1.16 | 1.28 | 0.94 | 1.01 | 0.89 | 0.98 | 1.00 | 0.99 | NaN  |
| Q9NQG5 | Regulation of nuclear pre-mRNA domain-containing protein 1B | RPRD1B  | 134  | S | 0.906 | 73.98 | 0.78 | 0.53 | 0.74 | 0.53 | NaN  | NaN  | NaN  | NaN  | 0.55 |
| Q9NQG5 | Regulation of nuclear pre-mRNA domain-containing protein 1B | RPRD1B  | 166  | S | 1     | 225.5 | 1.00 | 1.02 | 1.00 | 1.01 | 1.18 | 0.94 | 1.46 | 1.13 | 0.94 |
| Q9NQP4 | Prefoldin subunit 4                                         | PFDN4   | 125  | S | 1     | 53.14 | 1.94 | 2.04 | NaN  | NaN  | NaN  | NaN  | NaN  | NaN  | NaN  |
| Q9NQS7 | Inner centromere protein                                    | INCENP  | 197  | S | 0.973 | 150.5 | 1.18 | NaN  | NaN  | 2.16 | 2.15 | 1.83 | NaN  | NaN  | NaN  |
| Q9NQS7 | Inner centromere protein                                    | INCENP  | 214  | S | 0.783 | 150.5 | 1.18 | NaN  | NaN  | 2.16 | 2.15 | 1.83 | NaN  | NaN  | NaN  |
| Q9NQW6 | Actin-binding protein anillin                               | ANLN    | 182  | S | 1     | 209.2 | 0.91 | 1.01 | 0.98 | 1.84 | 1.97 | 2.00 | 0.63 | 0.65 | 0.70 |
| Q9NQW6 | Actin-binding protein anillin                               | ANLN    | 54   | S | 1     | 83.31 | 1.27 | 1.57 | 1.26 | 2.75 | 2.78 | NaN  | 0.82 | 1.01 | NaN  |
| Q9NQW6 | Actin-binding protein anillin                               | ANLN    | 517  | S | 0.815 | 149.5 | 0.81 | NaN  | 1.05 | 2.25 | 2.39 | NaN  | NaN  | 0.92 | 0.80 |
| Q9NQW6 | Actin-binding protein anillin                               | ANLN    | 518  | S | 0.992 | 260.1 | 0.70 | 0.65 | 0.86 | 2.04 | 2.18 | 2.26 | 1.04 | 0.86 | NaN  |
| Q9NQW6 | Actin-binding protein anillin                               | ANLN    | 792  | S | 0.999 | 98.16 | 0.93 | 0.84 | NaN  | 2.01 | 1.94 | 2.16 | 0.27 | 0.30 | NaN  |
| Q9NQW6 | Actin-binding protein anillin                               | ANLN    | 323  | S | 1     | 77.64 | NaN  | NaN  | 0.79 | NaN  | NaN  | 1.80 | NaN  | 0.65 | 0.64 |
| Q9NQW6 | Actin-binding protein anillin                               | ANLN    | 65   | S | 0.994 | 102.6 | 0.73 | 0.67 | 0.68 | 1.64 | 1.67 | 1.58 | 0.58 | 0.58 | 0.56 |
| Q9NQZ2 | Something about silencing protein 10                        | UTP3    | 365  | S | 1     | 162   | 1.50 | 1.23 | 2.13 | NaN  | 1.33 | NaN  | 1.69 | 2.14 | NaN  |
| Q9NQZ2 | Something about silencing protein 10                        | UTP3    | 368  | S | 1     | 162   | 1.50 | 1.23 | 2.13 | NaN  | 1.33 | NaN  | 1.69 | 2.14 | NaN  |

|        |                                                  |          |      |   |       |       |      |      |      |      |      |      |      |      |      |
|--------|--------------------------------------------------|----------|------|---|-------|-------|------|------|------|------|------|------|------|------|------|
| Q9NR19 | Acetyl-coenzyme A synthetase, cytoplasmic        | ACSS2    | 267  | S | 0.995 | 167.9 | NaN  | 0.49 | NaN  | 0.77 | NaN  | 0.81 | NaN  | 0.51 | 0.60 |
| Q9NR19 | Acetyl-coenzyme A synthetase, cytoplasmic        | ACSS2    | 30   | S | 1     | 135.2 | 0.55 | 0.57 | 0.59 | 0.66 | 0.68 | 0.68 | 0.91 | 0.92 | 0.93 |
| Q9NR30 | Nucleolar RNA helicase 2                         | DDX21    | 71   | S | 1     | 64.41 | 1.27 | 1.24 | NaN  | NaN  | NaN  | NaN  | NaN  | NaN  | NaN  |
| Q9NR30 | Nucleolar RNA helicase 2                         | DDX21    | 89   | S | 1     | 103.2 | 0.61 | 0.67 | 0.77 | 0.73 | 1.05 | 1.02 | 0.67 | 0.61 | 0.65 |
| Q9NR30 | Nucleolar RNA helicase 2                         | DDX21    | 121  | S | 1     | 151.4 | 1.06 | 0.99 | 0.78 | 1.12 | 0.91 | 1.12 | 0.74 | 0.67 | 0.75 |
| Q9NRF2 | SH2B adapter protein 1                           | SH2B1    | 125  | S | 0.859 | 100.7 | 0.95 | 0.97 | 0.68 | NaN  | NaN  | NaN  | NaN  | NaN  | NaN  |
| Q9NRX5 | Serine incorporator 1                            | SERINC1  | 364  | S | 1     | 83.77 | 1.64 | 2.17 | 1.40 | 1.35 | 1.34 | NaN  | 1.15 | 0.85 | NaN  |
| Q9NRY4 | Rho GTPase-activating protein 35                 | ARHGAP35 | 975  | S | 1     | 144.4 | 0.97 | NaN  | 0.87 | 0.79 | 1.33 | 0.84 | NaN  | NaN  | NaN  |
| Q9NRY4 | Rho GTPase-activating protein 35                 | ARHGAP35 | 1179 | S | 1     | 254.6 | 0.93 | 0.92 | 0.84 | 0.94 | 0.99 | 0.85 | 1.00 | 0.98 | 1.02 |
| Q9NSV4 | Protein diaphanous homolog 3                     | DIAPH3   | 1093 | S | 0.984 | 54.97 | 0.87 | NaN  | 0.75 | 1.18 | 1.26 | NaN  | 0.91 | 0.90 | 0.96 |
| Q9NTI5 | Sister chromatid cohesion protein PDS5 homolog B | PDS5B    | 1358 | S | 1     | 250.4 | NaN  | NaN  | NaN  | 1.78 | NaN  | NaN  | 2.07 | NaN  | 2.75 |
| Q9NTI5 | Sister chromatid cohesion protein PDS5 homolog B | PDS5B    | 1283 | S | 1     | 124.8 | 0.94 | 0.86 | 0.81 | 1.29 | 1.21 | 1.15 | 0.74 | 0.84 | 0.76 |
| Q9NTI5 | Sister chromatid cohesion protein PDS5 homolog B | PDS5B    | 1166 | S | 0.975 | 401.3 | 0.71 | 0.56 | 0.84 | 0.94 | 1.10 | 0.94 | 0.50 | 0.50 | NaN  |
| Q9NTZ6 | RNA-binding protein 12                           | RBM12    | 411  | S | 0.968 | 61.42 | NaN  | NaN  | NaN  | NaN  | NaN  | NaN  | 0.90 | NaN  | 0.99 |
| Q9NTZ6 | RNA-binding protein 12                           | RBM12    | 413  | S | 0.93  | 54.65 | 1.10 | NaN  | NaN  | 0.98 | NaN  | 0.99 | NaN  | NaN  | NaN  |
| Q9NVD7 | Alpha-parvin                                     | PARVA    | 8    | S | 0.711 | 68.88 | NaN  | NaN  | NaN  | NaN  | 1.08 | 1.44 | NaN  | 0.98 | NaN  |
| Q9NVD7 | Alpha-parvin                                     | PARVA    | 14   | S | 0.997 | 129.5 | 1.71 | 1.32 | 1.29 | 1.34 | 1.30 | 1.35 | 1.48 | 1.60 | 1.61 |
| Q9NVD7 | Alpha-parvin                                     | PARVA    | 19   | S | 0.983 | 113.7 | 0.60 | 0.61 | 0.61 | 0.48 | 0.45 | 1.28 | 0.90 | 0.97 | 0.90 |
| Q9NW82 | WD repeat-containing protein 70                  | WDR70    | 638  | S | 1     | 161.3 | 0.65 | 0.52 | NaN  | 1.38 | 1.17 | NaN  | NaN  | 2.72 | 1.90 |
| Q9NWB6 | Arginine and glutamate-rich protein 1            | ARGLU1   | 76   | S | 0.709 | 95.07 | NaN  | NaN  | NaN  | NaN  | 0.84 | NaN  | 1.10 | 0.91 | NaN  |
| Q9NWB6 | Arginine and glutamate-rich protein 1            | ARGLU1   | 77   | S | 0.999 | 155.3 | 0.93 | 0.88 | 0.85 | 0.78 | 0.77 | 0.76 | 0.86 | 0.90 | 0.91 |
| Q9NWH9 | SAFB-like transcription modulator                | SLTM     | 289  | S | 1     | 218.4 | 0.64 | 0.64 | 0.65 | 0.71 | 0.70 | 0.70 | 0.68 | 0.71 | 0.71 |
| Q9NWZ5 | Uridine-cytidine kinase-like 1                   | UCKL1    | 56   | S | 0.982 | 91.59 | 1.31 | 1.28 | 1.30 | 1.81 | 1.97 | NaN  | NaN  | 0.93 | NaN  |
| Q9NWZ5 | Uridine-cytidine kinase-like 1                   | UCKL1    | 539  | S | 1     | 126.2 | 0.52 | 0.74 | NaN  | NaN  | NaN  | NaN  | 0.90 | NaN  | 1.13 |
| Q9NXC5 | WD repeat-containing protein mio                 | MIOS     | 766  | S | 0.888 | 125.3 | NaN  | NaN  | NaN  | 0.69 | NaN  | NaN  | 0.63 | 0.69 | 0.80 |
| Q9NXE8 | Pre-mRNA-splicing factor CWC25 homolog           | CWC25    | 218  | S | 0.62  | 68.46 | NaN  | NaN  | NaN  | 0.99 | 0.96 | NaN  | 0.68 | 0.57 | NaN  |
| Q9NY61 | Protein AATF                                     | AATF     | 316  | S | 1     | 131.1 | 0.70 | 0.74 | 0.72 | 0.80 | 0.80 | 0.74 | 0.72 | 0.87 | 0.79 |
| Q9NY61 | Protein AATF                                     | AATF     | 320  | S | 1     | 141.7 | 0.58 | 0.63 | 0.86 | 0.85 | 0.59 | 0.55 | 1.12 | 1.08 | 0.79 |
| Q9NY61 | Protein AATF                                     | AATF     | 321  | S | 1     | 141.7 | 0.58 | 0.63 | 0.86 | 0.85 | 0.59 | 0.55 | 1.12 | 1.08 | 0.79 |
| Q9NYQ8 | Protocadherin Fat 2                              | FAT2     | 1873 | S | 0.971 | 43.8  | NaN  | NaN  | NaN  | 0.89 | 0.93 | 0.95 | 0.40 | 0.46 | NaN  |
| Q9NZ63 | Uncharacterized protein C9orf78                  | C9orf78  | 261  | S | 1     | 102.5 | 1.19 | 1.07 | 1.08 | NaN  | NaN  | 1.08 | NaN  | 1.10 | 1.19 |
| Q9NZL4 | Hsp70-binding protein 1                          | HSPBP1   | 351  | S | 0.803 | 154.5 | NaN  | 1.53 | 1.40 | NaN  | NaN  | NaN  | NaN  | NaN  | NaN  |
| Q9NZM1 | Myoferlin                                        | MYOF     | 1915 | S | 0.998 | 48.39 | 0.65 | 0.65 | NaN  | NaN  | NaN  | 0.85 | NaN  | 1.15 | 0.87 |

|        |                                                           |            |      |   |       |       |      |      |      |      |      |      |      |      |      |
|--------|-----------------------------------------------------------|------------|------|---|-------|-------|------|------|------|------|------|------|------|------|------|
| Q9NZN4 | EH domain-containing protein                              | EHD2       | 438  | S | 1     | 288.3 | 0.44 | 0.46 | 0.49 | 0.64 | 0.63 | 0.62 | 0.58 | 0.57 | 0.58 |
| Q9NZN4 | EH domain-containing protein                              | EHD2       | 468  | S | 0.85  | 52.47 | NaN  | NaN  | NaN  | NaN  | 0.87 | 0.74 | 0.62 | NaN  | NaN  |
| Q9NZN4 | EH domain-containing protein                              | EHD2       | 470  | S | 0.575 | 78.76 | 1.31 | NaN  | NaN  | 0.79 | NaN  | 0.74 | 0.62 | 0.65 | 0.71 |
| Q9NZQ7 | Programmed cell death 1 ligand 1                          | CD274      | 283  | S | 0.976 | 58.57 | NaN  | NaN  | 2.48 | NaN  | NaN  | NaN  | 1.86 | NaN  | 1.82 |
| Q9P0K7 | Ankyrin                                                   | RAI14      | 327  | S | 0.971 | 112.4 | 1.36 | 1.34 | NaN  | NaN  | NaN  | NaN  | NaN  | NaN  | NaN  |
| Q9P0K7 | Ankyrin                                                   | RAI14      | 281  | S | 0.996 | 105.3 | 1.32 | NaN  | 1.75 | 1.57 | 1.33 | 1.30 | 1.10 | 1.09 | NaN  |
| Q9P0K7 | Ankyrin                                                   | RAI14      | 412  | S | 0.742 | 60.36 | NaN  | 1.43 | NaN  | NaN  | 1.34 | 1.38 | 1.47 | 1.44 | 1.32 |
| Q9P206 | Uncharacterized protein KIAA1522                          | KIAA1522   | 669  | S | 1     | 88    | 1.22 | 0.98 | 0.68 | 0.65 | 0.70 | 0.62 | 1.02 | 1.02 | 1.01 |
| Q9P206 | Uncharacterized protein KIAA1522                          | KIAA1522   | 673  | S | 0.997 | 88    | 1.22 | 0.98 | 0.68 | 0.65 | 0.70 | 0.62 | 1.02 | 1.02 | 1.01 |
| Q9P206 | Uncharacterized protein KIAA1522                          | KIAA1522   | 545  | S | 1     | 104.2 | NaN  | 2.23 | 2.23 | NaN  | NaN  | NaN  | 1.37 | 2.11 | 2.33 |
| Q9P2B4 | CTTNBP2 N-terminal-like protein                           | CTTNBP2 NL | 488  | S | 1     | 113.4 | 0.76 | 0.73 | 0.64 | 0.63 | 0.71 | 0.57 | 0.61 | 0.69 | 0.69 |
| Q9P2B4 | CTTNBP2 N-terminal-like protein                           | CTTNBP2 NL | 481  | S | 0.889 | 85.85 | 1.01 | NaN  | 0.78 | NaN  | 0.49 | NaN  | 1.07 | 0.88 | 0.89 |
| Q9P2B4 | CTTNBP2 N-terminal-like protein                           | CTTNBP2 NL | 568  | S | 0.939 | 129.3 | 0.93 | 0.94 | NaN  | 0.85 | NaN  | 0.71 | 1.51 | 1.63 | 1.46 |
| Q9P2C4 | Transmembrane protein 181                                 | TMEM181    | 580  | S | 0.992 | 98.99 | NaN  | NaN  | NaN  | 0.96 | NaN  | 1.42 | NaN  | NaN  | NaN  |
| Q9P2E9 | Ribosome-binding protein 1                                | RRBP1      | 615  | S | 1     | 168.7 | 0.59 | 0.66 | 0.74 | 1.08 | 1.13 | 1.19 | 0.76 | 0.66 | 0.64 |
| Q9P2E9 | Ribosome-binding protein 1                                | RRBP1      | 1276 | S | 0.726 | 111.2 | 0.99 | 0.95 | 0.80 | 0.93 | 0.99 | NaN  | 0.70 | 0.60 | 0.47 |
| Q9P2E9 | Ribosome-binding protein 1                                | RRBP1      | 1277 | S | 0.779 | 111.2 | NaN  | NaN  | NaN  | 0.93 | 0.95 | NaN  | NaN  | 0.68 | 0.47 |
| Q9P2G1 | Ankyrin repeat and IBR domain-containing protein 1        | ANKIB1     | 737  | S | 1     | 92.04 | 0.62 | 0.87 | NaN  | 0.36 | NaN  | NaN  | NaN  | 0.79 | NaN  |
| Q9P2I0 | Cleavage and polyadenylation specificity factor subunit 2 | CPSF2      | 419  | S | 0.912 | 110.8 | 0.42 | 0.19 | 3.75 | 0.63 | NaN  | NaN  | 2.02 | NaN  | NaN  |
| Q9P2I0 | Cleavage and polyadenylation specificity factor subunit 2 | CPSF2      | 420  | S | 0.912 | 110.8 | 0.42 | 0.19 | 3.75 | 0.63 | NaN  | NaN  | 2.02 | NaN  | NaN  |
| Q9P2I0 | Cleavage and polyadenylation specificity factor subunit 2 | CPSF2      | 423  | S | 0.734 | 93.73 | 0.42 | NaN  | 3.75 | NaN  | NaN  | NaN  | 2.02 | NaN  | NaN  |
| Q9P2Q2 | FERM domain-containing protein 4A                         | FRMD4A     | 694  | S | 0.798 | 79.07 | NaN  | NaN  | NaN  | NaN  | 0.74 | 1.52 | NaN  | 0.86 | NaN  |
| Q9UBB9 | Tuftelin-interacting protein 11                           | TFIP11     | 98   | S | 1     | 165.5 | 0.79 | 0.92 | 0.95 | 1.02 | 0.87 | 0.84 | 1.14 | 1.29 | 1.17 |
| Q9UBB9 | Tuftelin-interacting protein 11                           | TFIP11     | 210  | S | 1     | 144.7 | 0.80 | 0.82 | 1.02 | 1.01 | 0.92 | 1.39 | 0.69 | 0.83 | 0.71 |
| Q9UDT6 | CAP-Gly domain-containing linker protein 2                | CLIP2      | 53   | S | 0.538 | 83.32 | NaN  | NaN  | 1.25 | NaN  | NaN  | 2.10 | 0.61 | NaN  | 0.78 |
| Q9UER7 | Death domain-associated protein 6                         | DAXX       | 495  | S | 1     | 168.4 | NaN  | 0.51 | 0.71 | 0.73 | 0.72 | 0.98 | 0.63 | 0.83 | 0.62 |
| Q9UEY8 | Gamma-adducin                                             | ADD3       | 677  | S | 0.957 | 132.8 | 0.58 | 0.58 | NaN  | 0.57 | 0.66 | NaN  | 0.46 | 0.87 | NaN  |
| Q9UEY8 | Gamma-adducin                                             | ADD3       | 679  | S | 0.926 | 99.93 | 0.58 | 0.58 | 0.48 | 0.57 | 0.66 | NaN  | 0.46 | 0.91 | NaN  |
| Q9UEY8 | Gamma-adducin                                             | ADD3       | 681  | S | 0.689 | 87.67 | 0.50 | 0.52 | NaN  | NaN  | 0.66 | NaN  | NaN  | NaN  | NaN  |
| Q9UGU5 | HMG domain-containing protein 4                           | HMGXB4     | 497  | S | 0.997 | 52.25 | NaN  | NaN  | 0.95 | 1.07 | 1.38 | NaN  | 1.09 | NaN  | NaN  |
| Q9UHB6 | LIM domain and actin-binding protein 1                    | LIMA1      | 373  | S | 0.912 | 172.1 | 0.67 | NaN  | NaN  | 0.99 | NaN  | 1.08 | 0.81 | NaN  | 0.89 |

|        |                                                                             |          |      |   |       |       |      |      |      |      |      |      |      |      |      |
|--------|-----------------------------------------------------------------------------|----------|------|---|-------|-------|------|------|------|------|------|------|------|------|------|
| Q9UHB6 | LIM domain and actin-binding protein 1                                      | LIMA1    | 374  | S | 0.983 | 168.8 | NaN  | 0.67 | 0.73 | NaN  | 0.99 | NaN  | NaN  | 0.80 | NaN  |
| Q9UHB6 | LIM domain and actin-binding protein 1                                      | LIMA1    | 686  | S | 0.987 | 75.77 | NaN  | NaN  | NaN  | 0.11 | 0.14 | 0.14 | 0.09 | 0.18 | 0.18 |
| Q9UHB6 | LIM domain and actin-binding protein 1                                      | LIMA1    | 490  | S | 1     | 199.4 | 1.03 | 1.04 | 0.98 | 1.10 | 1.13 | 1.06 | 0.93 | 0.89 | 0.91 |
| Q9UHB6 | LIM domain and actin-binding protein 1                                      | LIMA1    | 132  | S | 1     | 78.71 | 0.82 | 0.91 | 1.10 | 0.98 | 0.97 | 1.28 | NaN  | 0.71 | 0.98 |
| Q9UHB6 | LIM domain and actin-binding protein 1                                      | LIMA1    | 698  | S | 1     | 168.5 | 0.76 | 0.71 | 0.90 | 0.89 | 0.88 | 0.86 | 0.83 | NaN  | 0.99 |
| Q9UHB6 | LIM domain and actin-binding protein 1                                      | LIMA1    | 362  | S | 1     | 203.3 | 0.65 | 0.70 | 0.68 | 0.95 | 0.97 | 0.89 | 0.74 | 0.76 | 0.82 |
| Q9UHB6 | LIM domain and actin-binding protein 1                                      | LIMA1    | 609  | S | 1     | 117.8 | 0.70 | 0.65 | 0.62 | 0.75 | NaN  | 0.77 | NaN  | 1.08 | 0.92 |
| Q9UHB7 | AF4/FMR2 family member 4                                                    | AFF4     | 1055 | S | 1     | 94.19 | NaN  | NaN  | NaN  | 1.85 | NaN  | NaN  | 1.08 | 0.74 | NaN  |
| Q9UHB7 | AF4/FMR2 family member 4                                                    | AFF4     | 1058 | S | 1     | 99.53 | NaN  | 1.13 | 1.01 | 1.39 | 1.29 | 1.16 | 0.55 | NaN  | 0.73 |
| Q9UHB7 | AF4/FMR2 family member 4                                                    | AFF4     | 703  | S | 1     | 113.2 | 1.16 | 1.14 | 1.25 | 1.63 | 1.71 | 1.13 | 1.13 | 0.97 | 0.99 |
| Q9UHB7 | AF4/FMR2 family member 4                                                    | AFF4     | 706  | S | 1     | 69.7  | 2.54 | 2.10 | 2.19 | 2.55 | 2.62 | 2.25 | 1.38 | 1.22 | NaN  |
| Q9UHB7 | AF4/FMR2 family member 4                                                    | AFF4     | 180  | S | 0.957 | 88.28 | 1.70 | 0.93 | 1.60 | 1.60 | NaN  | 1.51 | NaN  | NaN  | 0.92 |
| Q9UHD8 | Septin-9                                                                    | 9-Sep    | 85   | S | 1     | 150.4 | 1.38 | 1.36 | 1.28 | 1.10 | 1.02 | 1.17 | 1.20 | 1.16 | 1.23 |
| Q9UHD8 | Septin-9                                                                    | 9-Sep    | 30   | S | 1     | 262.4 | 1.77 | 1.72 | 1.86 | 1.62 | 1.65 | 1.47 | 1.86 | 1.38 | 1.75 |
| Q9UHK0 | Nuclear fragile X mental retardation-interacting protein                    | NUFIP1   | 338  | S | 1     | 70.42 | 1.08 | 1.30 | NaN  | NaN  | NaN  | NaN  | NaN  | NaN  | NaN  |
| Q9UHK0 | Nuclear fragile X mental retardation-interacting protein                    | NUFIP1   | 340  | S | 0.997 | 70.42 | 1.08 | 1.30 | NaN  | NaN  | NaN  | NaN  | NaN  | NaN  | NaN  |
| Q9UHK0 | Nuclear fragile X mental retardation-interacting protein                    | NUFIP1   | 342  | S | 0.994 | 70.42 | 1.08 | 1.30 | NaN  | NaN  | NaN  | NaN  | NaN  | NaN  | NaN  |
| Q9UHR4 | Brain-specific angiogenesis inhibitor 1-associated protein 2-like protein 1 | BAIAP2L1 | 414  | S | 0.779 | 79.46 | 2.09 | 1.48 | 1.57 | 1.90 | NaN  | NaN  | 2.53 | NaN  | 2.53 |
| Q9UHV7 | Mediator of RNA polymerase II transcription subunit 13                      | MED13    | 890  | S | 0.97  | 53.36 | 1.08 | NaN  | NaN  | NaN  | 1.02 | NaN  | 0.93 | 1.18 | NaN  |
| Q9UIG0 | Tyrosine-protein kinase Leucyl-cystinyl                                     | BAZ1B    | 1468 | S | 1     | 173.9 | 0.88 | 1.14 | NaN  | 0.80 | NaN  | NaN  | 1.56 | 1.11 | 1.03 |
| Q9UIQ6 | aminopeptidase;Leucyl-cystinyl aminopeptidase, pregnancy serum form         | LNPEP    | 329  | S | 0.644 | 45.92 | 0.64 | NaN  | 0.65 | 0.66 | 0.80 | 0.68 | NaN  | 0.60 | 0.91 |
| Q9UJM3 | ERBB receptor feedback inhibitor 1                                          | ERRF1    | 273  | S | 0.995 | 50.36 | NaN  | NaN  | 1.84 | NaN  | NaN  | NaN  | 1.43 | 2.42 | NaN  |
| Q9UJM3 | ERBB receptor feedback inhibitor 1                                          | ERRF1    | 251  | S | 0.997 | 93.92 | 2.71 | 2.64 | 2.71 | 2.14 | 2.26 | NaN  | 2.15 | 2.13 | 2.13 |
| Q9UJX2 | Cell division cycle protein 23 homolog                                      | CDC23    | 588  | S | 0.996 | 79.88 | NaN  | 0.59 | 1.33 | NaN  | NaN  | NaN  | 1.18 | NaN  | 0.86 |
| Q9UK58 | Cyclin-L1                                                                   | CCNL1    | 352  | S | 1     | 104.1 | 1.13 | 1.10 | 1.10 | 1.12 | 1.14 | 0.99 | 0.98 | 0.97 | 1.04 |
| Q9UK58 | Cyclin-L1                                                                   | CCNL1    | 335  | S | 0.982 | 149.2 | 2.35 | NaN  | 1.95 | NaN  | NaN  | 1.75 | 2.24 | NaN  | 1.78 |
| Q9UK58 | Cyclin-L1                                                                   | CCNL1    | 341  | S | 0.778 | 140.3 | NaN  | 0.77 | 1.95 | NaN  | NaN  | 1.75 | NaN  | 0.62 | 1.78 |
| Q9UK61 | Protein FAM208A                                                             | FAM208A  | 927  | S | 0.763 | 47.73 | NaN  | NaN  | NaN  | 0.60 | 0.54 | 0.56 | 1.01 | 0.96 | NaN  |

|        |                                                                                                                    |         |      |   |       |       |      |      |      |      |      |      |      |      |      |
|--------|--------------------------------------------------------------------------------------------------------------------|---------|------|---|-------|-------|------|------|------|------|------|------|------|------|------|
| Q9UK76 | Hematological and neurological expressed 1 protein;Hematological and neurological expressed 1 protein N-terminally | HN1     | 131  | S | 1     | 101.9 | 3.53 | 2.89 | NaN  | 2.96 | NaN  | 3.45 | NaN  | 2.55 | 2.58 |
| Q9UK76 | Hematological and neurological expressed 1 protein;Hematological and neurological expressed 1 protein N-terminally | HN1     | 87   | S | 0.997 | 319.4 | 1.03 | 1.04 | 0.99 | 0.83 | 0.83 | 0.82 | 1.75 | 1.74 | 1.82 |
| Q9UK76 | Hematological and neurological expressed 1 protein;Hematological and neurological expressed 1 protein N-terminally | HN1     | 88   | S | 0.627 | 172.1 | NaN  | 1.16 | NaN  | 0.81 | 0.81 | 0.88 | 1.69 | 1.61 | NaN  |
| Q9UKA4 | A-kinase anchor protein 11                                                                                         | AKAP11  | 448  | S | 1     | 115.6 | 3.19 | 2.94 | 2.89 | NaN  | NaN  | NaN  | NaN  | NaN  | NaN  |
| Q9UKA4 | A-kinase anchor protein 11                                                                                         | AKAP11  | 1240 | S | 0.501 | 66.33 | NaN  | 0.78 | 0.77 | NaN  | NaN  | NaN  | NaN  | NaN  | NaN  |
| Q9UKA4 | A-kinase anchor protein 11                                                                                         | AKAP11  | 1242 | S | 1     | 152.9 | 0.89 | 0.82 | 0.81 | 0.95 | 0.85 | 0.88 | 0.77 | 0.68 | 0.76 |
| Q9UKE5 | TRAF2 and NCK-interacting protein kinase                                                                           | TNIK    | 769  | S | 1     | 93.77 | 0.55 | 0.47 | NaN  | NaN  | NaN  | NaN  | NaN  | NaN  | NaN  |
| Q9UKG1 | DCC-interacting protein 13-alpha                                                                                   | APPL1   | 401  | S | 0.829 | 91.59 | NaN  | NaN  | 4.72 | 5.07 | NaN  | 3.88 | 4.80 | NaN  | 3.93 |
| Q9UKJ3 | G patch domain-containing protein 8                                                                                | GPATCH8 | 1081 | S | 0.982 | 71.4  | NaN  | NaN  | NaN  | NaN  | 1.05 | 1.12 | NaN  | 0.82 | NaN  |
| Q9UKJ3 | G patch domain-containing protein 8                                                                                | GPATCH8 | 740  | S | 0.979 | 98    | 1.71 | 1.52 | 1.58 | 1.63 | NaN  | 1.53 | 1.35 | NaN  | 1.18 |
| Q9UKJ3 | G patch domain-containing protein 8                                                                                | GPATCH8 | 653  | S | 0.822 | 57.62 | 1.58 | 1.33 | 1.55 | NaN  | NaN  | NaN  | NaN  | NaN  | NaN  |
| Q9UKL0 | REST corepressor 1                                                                                                 | RCOR1   | 260  | S | 1     | 170.2 | 0.74 | 0.65 | NaN  | NaN  | NaN  | NaN  | NaN  | NaN  | NaN  |
| Q9UKM9 | RNA-binding protein Raly                                                                                           | RALY    | 135  | S | 1     | 110.8 | 1.13 | 1.14 | 1.13 | 1.10 | 1.08 | 1.11 | 1.05 | 1.06 | 1.09 |
| Q9ULE0 | Protein WWC3                                                                                                       | WWC3    | 927  | S | 0.995 | 79.23 | NaN  | NaN  | NaN  | NaN  | 0.64 | NaN  | 1.24 | 1.19 | 0.96 |
| Q9ULL5 | Proline-rich protein 12                                                                                            | PRR12   | 651  | S | 1     | 98.63 | 0.51 | 0.58 | NaN  | 0.49 | NaN  | NaN  | NaN  | NaN  | NaN  |
| Q9ULW0 | Targeting protein for Xklp2                                                                                        | TPX2    | 186  | S | 0.927 | 52.74 | 0.41 | 0.38 | NaN  | 1.03 | NaN  | NaN  | 0.43 | NaN  | NaN  |
| Q9ULW0 | Targeting protein for Xklp2                                                                                        | TPX2    | 738  | S | 1     | 144   | 2.34 | 3.77 | 2.45 | 4.98 | 6.39 | NaN  | 1.34 | 1.30 | 1.49 |
| Q9ULX3 | RNA-binding protein NOB1                                                                                           | NOB1    | 201  | S | 1     | 142.2 | NaN  | NaN  | NaN  | NaN  | 0.85 | 0.92 | NaN  | NaN  | NaN  |
| Q9UNZ2 | NSFL1 cofactor p47                                                                                                 | NSFL1C  | 114  | S | 1     | 136.4 | 1.00 | NaN  | 1.02 | 1.11 | 1.01 | 0.88 | 0.83 | 0.86 | 0.80 |
| Q9UPT8 | Zinc finger CCCH domain-containing protein 4                                                                       | ZC3H4   | 1104 | S | 0.947 | 89.15 | 1.05 | NaN  | 1.13 | 0.90 | 0.96 | 0.88 | 0.82 | 0.90 | 0.96 |
| Q9UPT8 | Zinc finger CCCH domain-containing protein 4                                                                       | ZC3H4   | 1110 | S | 0.754 | 88.57 | 1.08 | NaN  | 0.93 | 0.98 | NaN  | NaN  | 1.05 | NaN  | 0.87 |
| Q9UPT8 | Zinc finger CCCH domain-containing protein 4                                                                       | ZC3H4   | 1114 | S | 0.917 | 94.62 | 1.05 | 0.98 | 0.95 | 0.94 | 0.86 | 0.78 | NaN  | 0.95 | 0.78 |
| Q9UPT8 | Zinc finger CCCH domain-containing protein 4                                                                       | ZC3H4   | 908  | S | 0.83  | 80.36 | NaN  | NaN  | 1.09 | 1.23 | 1.92 | 2.02 | 1.02 | NaN  | NaN  |
| Q9UPT8 | Zinc finger CCCH domain-containing protein 4                                                                       | ZC3H4   | 159  | S | 1     | 87.16 | 1.10 | 1.16 | 1.12 | 1.06 | 1.25 | 1.07 | 0.93 | 0.83 | NaN  |

|        |                                              |         |      |   |       |       |      |      |      |      |      |      |      |      |      |
|--------|----------------------------------------------|---------|------|---|-------|-------|------|------|------|------|------|------|------|------|------|
| Q9UPT8 | Zinc finger CCCH domain-containing protein 4 | ZC3H4   | 1269 | S | 0.695 | 45.13 | 1.54 | 1.80 | NaN  | NaN  | NaN  | NaN  | 1.96 | NaN  | NaN  |
| Q9UPT8 | Zinc finger CCCH domain-containing protein 4 | ZC3H4   | 1275 | S | 1     | 94.92 | 0.89 | 1.80 | 1.04 | 1.11 | 1.06 | 0.59 | 1.96 | 1.04 | 0.97 |
| Q9UPU5 | Ubiquitin carboxyl-terminal hydrolase 24     | USP24   | 1943 | S | 1     | 111.7 | NaN  | NaN  | NaN  | 1.01 | NaN  | NaN  | 0.77 | NaN  | 0.67 |
| Q9UPU5 | Ubiquitin carboxyl-terminal hydrolase 24     | USP24   | 2047 | S | 1     | 103.3 | 0.72 | 0.83 | 0.83 | 0.74 | 0.94 | 0.79 | 0.90 | 1.11 | 0.89 |
| Q9UPU7 | TBC1 domain family member 2B                 | TBC1D2B | 957  | S | 1     | 172.1 | 1.81 | 0.85 | 0.94 | 0.76 | 0.74 | 0.58 | 1.10 | 1.49 | 1.35 |
| Q9UQ35 | Serine/arginine repetitive matrix protein 2  | SRRM2   | 1404 | S | 0.997 | 270.5 | 0.73 | 0.82 | 0.65 | 0.86 | NaN  | 0.71 | 0.62 | 0.70 | 0.59 |
| Q9UQ35 | Serine/arginine repetitive matrix protein 2  | SRRM2   | 1415 | S | 0.905 | 52.1  | 0.72 | 0.61 | NaN  | NaN  | NaN  | NaN  | NaN  | NaN  | NaN  |
| Q9UQ35 | Serine/arginine repetitive matrix protein 2  | SRRM2   | 1012 | S | 0.625 | 79.37 | 1.58 | 1.33 | NaN  | NaN  | NaN  | NaN  | 1.40 | NaN  | NaN  |
| Q9UQ35 | Serine/arginine repetitive matrix protein 2  | SRRM2   | 1014 | S | 0.998 | 150.9 | 1.33 | 1.38 | NaN  | 1.37 | 1.37 | 1.28 | NaN  | 1.44 | 1.57 |
| Q9UQ35 | Serine/arginine repetitive matrix protein 2  | SRRM2   | 2132 | S | 1     | 85.86 | 1.34 | 1.28 | 1.62 | NaN  | NaN  | 1.39 | 1.41 | 1.55 | 1.42 |
| Q9UQ35 | Serine/arginine repetitive matrix protein 2  | SRRM2   | 1188 | S | 0.999 | 60.46 | 2.33 | 2.11 | NaN  | NaN  | NaN  | NaN  | NaN  | NaN  | NaN  |
| Q9UQ35 | Serine/arginine repetitive matrix protein 2  | SRRM2   | 454  | S | 1     | 110.4 | 0.97 | NaN  | NaN  | NaN  | NaN  | NaN  | 1.25 | 0.72 | NaN  |
| Q9UQ35 | Serine/arginine repetitive matrix protein 2  | SRRM2   | 455  | S | 0.989 | 114.9 | 0.88 | 0.74 | NaN  | 0.68 | NaN  | NaN  | 0.70 | NaN  | 0.63 |
| Q9UQ35 | Serine/arginine repetitive matrix protein 2  | SRRM2   | 456  | S | 0.995 | 114.9 | 0.88 | NaN  | NaN  | 0.80 | 0.72 | 0.63 | 1.20 | NaN  | 0.62 |
| Q9UQ35 | Serine/arginine repetitive matrix protein 2  | SRRM2   | 1318 | S | 1     | 122.8 | 0.48 | 0.55 | 0.71 | 0.82 | 0.79 | 0.66 | 1.81 | 1.21 | 1.41 |
| Q9UQ35 | Serine/arginine repetitive matrix protein 2  | SRRM2   | 1320 | S | 1     | 246.3 | 1.24 | 1.27 | 1.41 | 1.04 | 1.06 | 1.05 | 1.06 | 1.25 | 1.12 |
| Q9UQ35 | Serine/arginine repetitive matrix protein 2  | SRRM2   | 1329 | S | 1     | 160.8 | 1.11 | 1.08 | 1.12 | 1.08 | 1.01 | 1.04 | 1.39 | 1.39 | 1.38 |
| Q9UQ35 | Serine/arginine repetitive matrix protein 2  | SRRM2   | 2740 | S | 1     | 60.12 | 1.11 | 1.09 | NaN  | NaN  | NaN  | NaN  | NaN  | NaN  | NaN  |
| Q9UQ35 | Serine/arginine repetitive matrix protein 2  | SRRM2   | 1124 | S | 0.999 | 134   | 1.04 | 0.95 | 1.08 | 1.28 | 1.18 | 1.32 | 0.98 | 0.96 | 0.89 |
| Q9UQ35 | Serine/arginine repetitive matrix protein 2  | SRRM2   | 322  | S | 0.999 | 263.5 | 0.84 | 0.82 | 1.18 | 0.91 | 1.15 | 1.05 | 1.40 | 1.25 | 0.94 |
| Q9UQ35 | Serine/arginine repetitive matrix protein 2  | SRRM2   | 323  | S | 0.999 | 245   | 0.90 | 0.96 | 0.93 | 0.88 | 0.88 | 0.83 | 0.95 | 0.99 | 1.12 |
| Q9UQ35 | Serine/arginine repetitive matrix protein 2  | SRRM2   | 1072 | S | 0.787 | 97.47 | NaN  | 0.49 | NaN  | NaN  | NaN  | NaN  | 0.58 | 0.46 | NaN  |
| Q9UQ35 | Serine/arginine repetitive matrix protein 2  | SRRM2   | 1073 | S | 0.905 | 97.16 | 0.54 | NaN  | 0.53 | 0.51 | NaN  | 0.53 | NaN  | NaN  | 0.51 |

|        |                                             |       |      |   |       |       |      |      |      |      |      |      |      |      |      |
|--------|---------------------------------------------|-------|------|---|-------|-------|------|------|------|------|------|------|------|------|------|
| Q9UQ35 | Serine/arginine repetitive matrix protein 2 | SRRM2 | 1482 | S | 1     | 120.8 | 0.51 | 0.48 | 0.61 | 0.71 | 0.62 | 0.74 | 0.98 | 0.60 | 0.58 |
| Q9UQ35 | Serine/arginine repetitive matrix protein 2 | SRRM2 | 1483 | S | 1     | 172.2 | 0.64 | 0.58 | 0.49 | 0.78 | 0.62 | 0.63 | 0.73 | 0.60 | 0.70 |
| Q9UQ35 | Serine/arginine repetitive matrix protein 2 | SRRM2 | 1762 | S | 1     | 53    | 1.13 | NaN  | NaN  | NaN  | 1.15 | NaN  | 1.16 | 1.16 | NaN  |
| Q9UQ35 | Serine/arginine repetitive matrix protein 2 | SRRM2 | 1764 | S | 1     | 53    | 1.13 | NaN  | NaN  | NaN  | 1.15 | NaN  | 1.16 | 1.16 | NaN  |
| Q9UQ35 | Serine/arginine repetitive matrix protein 2 | SRRM2 | 435  | S | 1     | 121   | 0.95 | 0.95 | 1.02 | 0.97 | 0.83 | 0.99 | 0.99 | 0.97 | 0.98 |
| Q9UQ35 | Serine/arginine repetitive matrix protein 2 | SRRM2 | 436  | S | 1     | 121   | 0.95 | 0.95 | 1.02 | 0.97 | 0.83 | 0.99 | 0.99 | 0.97 | 0.98 |
| Q9UQ35 | Serine/arginine repetitive matrix protein 2 | SRRM2 | 437  | S | 1     | 121   | 0.95 | 0.95 | 1.02 | 0.97 | 0.84 | 0.99 | 0.99 | 0.91 | 0.89 |
| Q9UQ35 | Serine/arginine repetitive matrix protein 2 | SRRM2 | 440  | S | 1     | 121   | 0.95 | 0.95 | 1.02 | 0.97 | 0.84 | 0.99 | 0.99 | 0.91 | 0.89 |
| Q9UQ35 | Serine/arginine repetitive matrix protein 2 | SRRM2 | 377  | S | 0.999 | 170.5 | 1.00 | 1.91 | 0.97 | 1.33 | 0.88 | 1.53 | 1.08 | 1.10 | NaN  |
| Q9UQ35 | Serine/arginine repetitive matrix protein 2 | SRRM2 | 387  | S | 0.986 | 92.7  | NaN  | 2.09 | 1.20 | NaN  | NaN  | NaN  | NaN  | NaN  | NaN  |
| Q9UQ35 | Serine/arginine repetitive matrix protein 2 | SRRM2 | 398  | S | 0.873 | 170.5 | 0.97 | 1.07 | 0.97 | 1.33 | 0.92 | 1.53 | 0.82 | 1.10 | NaN  |
| Q9UQ35 | Serine/arginine repetitive matrix protein 2 | SRRM2 | 892  | S | 0.792 | 92.94 | NaN  | NaN  | NaN  | NaN  | 0.98 | 0.86 | NaN  | 1.03 | NaN  |
| Q9UQ35 | Serine/arginine repetitive matrix protein 2 | SRRM2 | 895  | S | 0.724 | 79.29 | NaN  | NaN  | 1.00 | NaN  | NaN  | NaN  | 1.12 | NaN  | 1.01 |
| Q9UQ35 | Serine/arginine repetitive matrix protein 2 | SRRM2 | 1462 | S | 0.659 | 137.4 | NaN  | NaN  | NaN  | NaN  | 0.87 | 0.55 | 0.48 | NaN  | NaN  |
| Q9UQ35 | Serine/arginine repetitive matrix protein 2 | SRRM2 | 1463 | S | 0.922 | 129.2 | 0.59 | NaN  | 0.62 | 0.83 | NaN  | 0.81 | 0.48 | NaN  | NaN  |
| Q9UQ35 | Serine/arginine repetitive matrix protein 2 | SRRM2 | 2690 | S | 0.942 | 105.2 | 0.74 | NaN  | 1.51 | NaN  | NaN  | NaN  | NaN  | NaN  | 1.47 |
| Q9UQ35 | Serine/arginine repetitive matrix protein 2 | SRRM2 | 2692 | S | 0.999 | 94.19 | 1.40 | 1.59 | NaN  | 1.30 | 1.18 | 1.27 | 1.39 | 1.41 | NaN  |
| Q9UQ35 | Serine/arginine repetitive matrix protein 2 | SRRM2 | 2694 | S | 1     | 105.2 | 1.40 | 1.59 | 1.51 | 1.30 | 1.18 | 1.27 | 1.39 | 1.41 | 1.47 |
| Q9UQ35 | Serine/arginine repetitive matrix protein 2 | SRRM2 | 1179 | S | 1     | 160   | 0.86 | 0.83 | 0.87 | 0.99 | 1.04 | 0.97 | 0.56 | 0.78 | 0.80 |
| Q9UQ35 | Serine/arginine repetitive matrix protein 2 | SRRM2 | 2449 | S | 0.948 | 211.3 | 2.16 | 2.23 | 2.42 | NaN  | 2.09 | 1.75 | NaN  | 2.06 | 1.89 |
| Q9UQ35 | Serine/arginine repetitive matrix protein 2 | SRRM2 | 2121 | S | 0.927 | 55.84 | 0.98 | 1.41 | 1.44 | NaN  | 2.10 | NaN  | NaN  | 0.84 | NaN  |
| Q9UQ35 | Serine/arginine repetitive matrix protein 2 | SRRM2 | 2123 | S | 0.934 | 55.84 | 0.98 | 1.41 | 1.44 | NaN  | 2.10 | NaN  | NaN  | 0.84 | NaN  |
| Q9UQ35 | Serine/arginine repetitive matrix protein 2 | SRRM2 | 2100 | S | 1     | 98    | 1.00 | 1.00 | 1.21 | 1.01 | 0.93 | 1.07 | 1.12 | 1.18 | NaN  |



|        |                                             |       |      |   |       |       |      |      |      |      |      |      |      |      |      |
|--------|---------------------------------------------|-------|------|---|-------|-------|------|------|------|------|------|------|------|------|------|
| Q9UQ35 | Serine/arginine repetitive matrix protein 2 | SRRM2 | 2102 | S | 1     | 98    | 1.00 | 1.00 | 1.21 | 1.01 | 0.93 | 1.07 | 1.12 | 1.18 | NaN  |
| Q9UQ35 | Serine/arginine repetitive matrix protein 2 | SRRM2 | 854  | S | 0.917 | 78.16 | 0.95 | 0.78 | 1.60 | 0.91 | NaN  | 1.55 | 0.83 | 2.17 | 2.32 |
| Q9UQ35 | Serine/arginine repetitive matrix protein 2 | SRRM2 | 857  | S | 1     | 203.2 | 0.76 | 0.75 | 0.74 | 0.87 | 0.77 | 1.55 | 0.92 | 0.88 | 0.92 |
| Q9UQ35 | Serine/arginine repetitive matrix protein 2 | SRRM2 | 1083 | S | 1     | 173.6 | 0.98 | 0.99 | 0.99 | 0.95 | 1.07 | 0.97 | 1.07 | 1.07 | 1.11 |
| Q9UQ35 | Serine/arginine repetitive matrix protein 2 | SRRM2 | 994  | S | 0.98  | 86.55 | 1.96 | 1.70 | 1.96 | 1.71 | 1.45 | 1.68 | 1.83 | 2.13 | 1.86 |
| Q9UQ35 | Serine/arginine repetitive matrix protein 2 | SRRM2 | 839  | S | 0.746 | 70.65 | 1.23 | 1.26 | 1.32 | 1.23 | 1.14 | 1.31 | 1.24 | NaN  | 1.38 |
| Q9UQ35 | Serine/arginine repetitive matrix protein 2 | SRRM2 | 2702 | S | 1     | 89.56 | 1.04 | 1.10 | 0.99 | 0.92 | 0.94 | 0.97 | 1.05 | 1.07 | 1.14 |
| Q9UQ35 | Serine/arginine repetitive matrix protein 2 | SRRM2 | 1729 | S | 1     | 59.15 | NaN  | 1.31 | 0.43 | NaN  | 0.51 | NaN  | NaN  | 0.77 | NaN  |
| Q9UQ35 | Serine/arginine repetitive matrix protein 2 | SRRM2 | 1732 | S | 1     | 59.15 | NaN  | 1.31 | 0.43 | NaN  | 0.51 | NaN  | NaN  | 0.77 | NaN  |
| Q9UQ35 | Serine/arginine repetitive matrix protein 2 | SRRM2 | 950  | S | 1     | 76.05 | 1.22 | 1.36 | 1.18 | 1.27 | 1.18 | 1.15 | NaN  | 1.59 | 1.56 |
| Q9UQ35 | Serine/arginine repetitive matrix protein 2 | SRRM2 | 952  | S | 1     | 102.7 | 0.80 | 0.91 | 1.02 | 1.28 | 1.02 | 0.95 | 0.95 | 0.95 | 0.75 |
| Q9UQ35 | Serine/arginine repetitive matrix protein 2 | SRRM2 | 954  | S | 0.999 | 127.3 | 0.39 | 0.40 | 0.42 | 0.45 | 0.45 | 0.42 | 0.40 | 0.41 | 0.38 |
| Q9UQ35 | Serine/arginine repetitive matrix protein 2 | SRRM2 | 957  | S | 0.917 | 69.11 | NaN  | NaN  | NaN  | NaN  | 1.18 | 1.21 | NaN  | 1.59 | 1.56 |
| Q9UQ35 | Serine/arginine repetitive matrix protein 2 | SRRM2 | 1691 | S | 0.896 | 47.61 | 1.12 | 1.37 | NaN  | NaN  | NaN  | NaN  | NaN  | NaN  | NaN  |
| Q9UQ35 | Serine/arginine repetitive matrix protein 2 | SRRM2 | 1694 | S | 0.964 | 80.68 | 0.58 | 0.55 | 0.54 | 0.65 | 0.59 | 0.63 | NaN  | NaN  | NaN  |
| Q9UQ35 | Serine/arginine repetitive matrix protein 2 | SRRM2 | 2581 | S | 0.984 | 127.8 | 0.97 | 1.01 | 0.97 | 0.97 | 0.98 | 0.94 | 1.06 | 1.07 | 1.09 |
| Q9UQ35 | Serine/arginine repetitive matrix protein 2 | SRRM2 | 346  | S | 0.975 | 51.7  | 1.06 | 1.09 | NaN  | NaN  | 1.01 | 0.92 | 1.15 | NaN  | NaN  |
| Q9UQ35 | Serine/arginine repetitive matrix protein 2 | SRRM2 | 351  | S | 0.996 | 102.1 | 1.00 | 1.04 | 1.05 | 0.95 | 0.94 | 0.92 | 1.09 | 1.08 | 1.10 |
| Q9UQ35 | Serine/arginine repetitive matrix protein 2 | SRRM2 | 353  | S | 1     | 102.1 | 1.00 | 1.04 | 1.05 | 0.95 | 0.94 | 0.92 | 1.09 | 1.08 | 1.09 |
| Q9UQ35 | Serine/arginine repetitive matrix protein 2 | SRRM2 | 875  | S | 1     | 156.7 | 1.04 | 1.10 | NaN  | NaN  | 1.06 | 1.37 | 1.27 | 1.23 | 1.92 |
| Q9UQ35 | Serine/arginine repetitive matrix protein 2 | SRRM2 | 876  | S | 1     | 236.9 | 1.02 | 1.08 | 0.98 | 1.02 | 1.06 | 1.09 | 1.25 | NaN  | 1.25 |
| Q9UQ35 | Serine/arginine repetitive matrix protein 2 | SRRM2 | 1132 | S | 1     | 131   | NaN  | 0.82 | 0.84 | 0.95 | 0.95 | 0.94 | 0.71 | 0.74 | 0.76 |
| Q9UQ35 | Serine/arginine repetitive matrix protein 2 | SRRM2 | 1444 | S | 1     | 148.5 | NaN  | 0.65 | 0.69 | 0.74 | 0.71 | NaN  | NaN  | 0.60 | NaN  |

|        |                                             |       |      |   |       |       |      |      |      |      |      |      |      |      |      |
|--------|---------------------------------------------|-------|------|---|-------|-------|------|------|------|------|------|------|------|------|------|
| Q9UQ35 | Serine/arginine repetitive matrix protein 2 | SRRM2 | 1541 | S | 0.97  | 51    | NaN  | NaN  | 0.54 | NaN  | 0.89 | 0.38 | 0.75 | 0.66 | NaN  |
| Q9UQ35 | Serine/arginine repetitive matrix protein 2 | SRRM2 | 1550 | S | 0.604 | 50.51 | NaN  | NaN  | 0.54 | NaN  | 0.89 | NaN  | 0.59 | 0.66 | NaN  |
| Q9UQ35 | Serine/arginine repetitive matrix protein 2 | SRRM2 | 846  | S | 0.538 | 75.18 | 0.95 | NaN  | 1.02 | 1.58 | NaN  | 1.09 | 2.11 | 0.81 | 2.32 |
| Q9UQ35 | Serine/arginine repetitive matrix protein 2 | SRRM2 | 778  | S | 1     | 85.86 | 2.64 | 2.39 | 2.47 | 1.99 | 4.32 | 1.49 | 2.07 | 3.97 | 2.58 |
| Q9UQ35 | Serine/arginine repetitive matrix protein 2 | SRRM2 | 780  | S | 1     | 85.86 | 2.64 | 2.56 | 2.47 | 1.99 | 1.85 | 1.49 | 1.68 | 3.16 | 2.25 |
| Q9UQ35 | Serine/arginine repetitive matrix protein 2 | SRRM2 | 782  | S | 0.671 | 96.64 | 1.04 | 2.39 | 0.92 | NaN  | 1.85 | 1.07 | 2.56 | NaN  | NaN  |
| Q9UQ35 | Serine/arginine repetitive matrix protein 2 | SRRM2 | 783  | S | 0.988 | 89.9  | 2.64 | 2.56 | 2.47 | 0.97 | 4.32 | 1.84 | 2.47 | 2.51 | 0.96 |
| Q9UQ35 | Serine/arginine repetitive matrix protein 2 | SRRM2 | 2067 | S | 1     | 73.93 | 2.36 | 1.20 | 0.24 | 1.22 | 1.23 | 1.28 | 1.19 | 1.21 | 1.28 |
| Q9UQ35 | Serine/arginine repetitive matrix protein 2 | SRRM2 | 2071 | S | 1     | 73.93 | 2.36 | 1.20 | 1.32 | 1.22 | 1.23 | 1.28 | 1.19 | 1.21 | 1.28 |
| Q9UQ35 | Serine/arginine repetitive matrix protein 2 | SRRM2 | 1916 | S | 1     | 112.6 | 0.92 | 0.94 | 0.96 | 0.95 | 0.97 | 0.98 | 1.11 | 1.01 | NaN  |
| Q9UQ35 | Serine/arginine repetitive matrix protein 2 | SRRM2 | 2046 | S | 1     | 80.98 | 0.24 | 0.19 | 1.58 | 1.29 | 1.35 | 1.35 | 1.58 | 1.59 | 1.67 |
| Q9UQ35 | Serine/arginine repetitive matrix protein 2 | SRRM2 | 1497 | S | 1     | 122.6 | 0.80 | 0.52 | 1.09 | 1.03 | 1.08 | 1.00 | 1.25 | 1.19 | 1.19 |
| Q9UQ35 | Serine/arginine repetitive matrix protein 2 | SRRM2 | 1499 | S | 1     | 122.6 | 0.80 | 1.10 | 1.09 | 1.03 | 1.08 | 1.00 | 1.25 | 1.19 | 1.19 |
| Q9UQ35 | Serine/arginine repetitive matrix protein 2 | SRRM2 | 1501 | S | 1     | 103.3 | 1.17 | 0.52 | 1.09 | 1.07 | 1.10 | 1.02 | 1.28 | 1.27 | 1.22 |
| Q9UQ35 | Serine/arginine repetitive matrix protein 2 | SRRM2 | 1502 | S | 1     | 122.6 | 1.11 | 1.10 | 1.09 | 1.03 | 1.08 | 1.00 | 1.25 | 1.19 | 1.19 |
| Q9UQ35 | Serine/arginine repetitive matrix protein 2 | SRRM2 | 1099 | S | 0.99  | 52.93 | NaN  | NaN  | NaN  | 1.11 | 1.16 | 1.07 | 1.37 | 1.27 | 1.54 |
| Q9UQ35 | Serine/arginine repetitive matrix protein 2 | SRRM2 | 1101 | S | 0.986 | 52.93 | 1.31 | 1.19 | NaN  | 1.11 | 1.16 | 1.07 | 1.37 | 1.27 | 1.54 |
| Q9UQ35 | Serine/arginine repetitive matrix protein 2 | SRRM2 | 1102 | S | 0.887 | 88.77 | 1.31 | 1.19 | NaN  | NaN  | NaN  | NaN  | NaN  | NaN  | NaN  |
| Q9UQ35 | Serine/arginine repetitive matrix protein 2 | SRRM2 | 1103 | S | 0.999 | 166.5 | 0.89 | 0.86 | 0.81 | 0.63 | 0.56 | 0.57 | 0.70 | 0.75 | 0.85 |
| Q9UQ35 | Serine/arginine repetitive matrix protein 2 | SRRM2 | 1112 | S | 0.955 | 93.88 | 0.68 | 0.63 | 0.69 | 0.72 | 0.59 | 0.65 | 0.56 | 0.80 | 0.77 |
| Q9UQ35 | Serine/arginine repetitive matrix protein 2 | SRRM2 | 2020 | S | 1     | 76.85 | 1.36 | 1.42 | 1.34 | 1.17 | 1.22 | 1.20 | 1.42 | 1.43 | 1.48 |
| Q9UQ35 | Serine/arginine repetitive matrix protein 2 | SRRM2 | 2407 | S | 0.992 | 57.53 | 1.67 | 1.67 | 1.60 | 1.38 | NaN  | 1.38 | 1.48 | 1.58 | 1.49 |
| Q9UQ35 | Serine/arginine repetitive matrix protein 2 | SRRM2 | 1925 | S | 1     | 72.58 | 1.37 | 1.38 | 1.27 | 1.19 | NaN  | 1.20 | 1.45 | 1.42 | 1.52 |

|        |                                                  |        |      |   |       |       |      |      |      |      |      |      |      |      |      |
|--------|--------------------------------------------------|--------|------|---|-------|-------|------|------|------|------|------|------|------|------|------|
| Q9UQ35 | Serine/arginine repetitive matrix protein 2      | SRRM2  | 1975 | S | 0.948 | 86.11 | 1.14 | 0.75 | 0.76 | 0.81 | 0.83 | 0.84 | 0.90 | 0.85 | NaN  |
| Q9UQ35 | Serine/arginine repetitive matrix protein 2      | SRRM2  | 1893 | S | 0.91  | 77.87 | 0.70 | 0.73 | NaN  | 0.84 | 0.80 | 0.79 | 0.94 | 0.94 | 0.88 |
| Q9UQ35 | Serine/arginine repetitive matrix protein 2      | SRRM2  | 1987 | S | 0.997 | 128.9 | 0.75 | 0.72 | 0.70 | 0.76 | 0.78 | 0.79 | 0.91 | 0.92 | 0.93 |
| Q9UQ35 | Serine/arginine repetitive matrix protein 2      | SRRM2  | 1382 | S | 0.905 | 170   | 1.60 | 1.33 | NaN  | NaN  | NaN  | NaN  | 0.92 | NaN  | NaN  |
| Q9UQ35 | Serine/arginine repetitive matrix protein 2      | SRRM2  | 1387 | S | 1     | 232.7 | 0.92 | 0.89 | 0.88 | 0.83 | 0.76 | 0.80 | 0.86 | 0.89 | 0.83 |
| Q9UQ35 | Serine/arginine repetitive matrix protein 2      | SRRM2  | 901  | S | 0.766 | 66.39 | NaN  | NaN  | 0.91 | NaN  | 0.89 | 0.83 | NaN  | NaN  | 0.97 |
| Q9UQ35 | Serine/arginine repetitive matrix protein 2      | SRRM2  | 902  | S | 0.717 | 76.16 | NaN  | NaN  | NaN  | NaN  | NaN  | NaN  | NaN  | 1.08 | 1.09 |
| Q9UQ35 | Serine/arginine repetitive matrix protein 2      | SRRM2  | 908  | S | 0.996 | 93.39 | 0.97 | 0.91 | 0.91 | 0.84 | 0.87 | 0.84 | 1.06 | 1.08 | 0.97 |
| Q9UQ35 | Serine/arginine repetitive matrix protein 2      | SRRM2  | 910  | S | 0.652 | 52.25 | NaN  | 1.80 | 1.06 | NaN  | NaN  | NaN  | NaN  | 1.11 | 1.14 |
| Q9UQ35 | Serine/arginine repetitive matrix protein 2      | SRRM2  | 912  | S | 0.968 | 93.39 | NaN  | 1.02 | 1.07 | 1.00 | NaN  | NaN  | 1.07 | 1.11 | 1.14 |
| Q9UQ35 | Serine/arginine repetitive matrix protein 2      | SRRM2  | 913  | S | 0.584 | 48.33 | NaN  | 1.80 | 1.06 | NaN  | NaN  | NaN  | 1.07 | NaN  | 1.18 |
| Q9UQ35 | Serine/arginine repetitive matrix protein 2      | SRRM2  | 914  | S | 0.818 | 93.39 | NaN  | 1.02 | 1.07 | 1.00 | NaN  | NaN  | 1.07 | 1.11 | 1.10 |
| Q9UQ35 | Serine/arginine repetitive matrix protein 2      | SRRM2  | 295  | S | 1     | 199   | 1.15 | 1.14 | 1.08 | 0.93 | 1.01 | 0.92 | 1.11 | 1.09 | 1.22 |
| Q9UQ35 | Serine/arginine repetitive matrix protein 2      | SRRM2  | 297  | S | 0.999 | 199   | 1.15 | 1.14 | 1.08 | 0.93 | 0.99 | 0.92 | 1.11 | 1.12 | 1.22 |
| Q9UQ35 | Serine/arginine repetitive matrix protein 2      | SRRM2  | 2398 | S | 0.993 | 158.9 | 1.02 | 1.06 | 1.10 | 1.01 | 0.99 | 0.95 | 1.04 | 1.21 | 1.20 |
| Q9UQ35 | Serine/arginine repetitive matrix protein 2      | SRRM2  | 972  | S | 0.812 | 91.28 | NaN  | NaN  | NaN  | 0.66 | NaN  | 0.80 | 0.76 | NaN  | NaN  |
| Q9UQ35 | Serine/arginine repetitive matrix protein 2      | SRRM2  | 973  | S | 0.773 | 91.28 | NaN  | NaN  | NaN  | 0.66 | NaN  | 0.80 | 0.76 | NaN  | NaN  |
| Q9UQ35 | Serine/arginine repetitive matrix protein 2      | SRRM2  | 974  | S | 0.8   | 86.94 | NaN  | NaN  | NaN  | 0.66 | 0.75 | 0.80 | NaN  | NaN  | NaN  |
| Q9UQR0 | Sex comb on midleg-like protein 2                | SCML2  | 267  | S | 0.548 | 81.73 | NaN  | NaN  | NaN  | NaN  | 0.96 | 0.91 | NaN  | 0.49 | NaN  |
| Q9Y232 | Chromodomain Y-like protein                      | CDYL   | 201  | S | 1     | 80.98 | 0.98 | 0.94 | 1.17 | 1.10 | 1.26 | 1.32 | 0.71 | 0.81 | 0.85 |
| Q9Y2D5 | A-kinase anchor protein 2                        | AKAP2  | 152  | S | 0.955 | 218.9 | 2.21 | 2.48 | 2.48 | 1.67 | 1.61 | 1.72 | 1.57 | 1.61 | 1.62 |
| Q9Y2D5 | A-kinase anchor protein 2                        | AKAP2  | 393  | S | 1     | 195.5 | 1.04 | 0.87 | 1.25 | 1.01 | 1.07 | 0.99 | 0.79 | 1.29 | 1.04 |
| Q9Y2D5 | A-kinase anchor protein 2                        | AKAP2  | 778  | S | 0.985 | 229.3 | 1.24 | 1.36 | 1.51 | 1.05 | 0.96 | 1.17 | 1.25 | 1.34 | 1.30 |
| Q9Y2U5 | Mitogen-activated protein kinase kinase kinase 2 | MAP3K2 | 163  | S | 0.63  | 98.53 | 1.14 | 0.96 | NaN  | NaN  | NaN  | NaN  | 1.11 | NaN  | NaN  |
| Q9Y2U8 | Inner nuclear membrane protein Man1              | LEMD3  | 140  | S | 0.998 | 85.56 | 1.37 | 1.19 | 1.72 | 1.49 | 1.79 | 1.28 | 0.91 | 1.11 | 1.20 |

|        |                                                     |        |      |   |       |       |      |      |      |      |      |      |      |      |      |
|--------|-----------------------------------------------------|--------|------|---|-------|-------|------|------|------|------|------|------|------|------|------|
| Q9Y2U8 | Inner nuclear membrane protein Man1                 | LEMD3  | 141  | S | 0.994 | 85.56 | 1.37 | 1.19 | 1.72 | 1.49 | 1.79 | 1.28 | 0.91 | 1.11 | 1.20 |
| Q9Y2W1 | Thyroid hormone receptor-associated protein 3       | THRAP3 | 243  | S | 1     | 228.6 | 1.19 | 1.16 | 1.15 | 1.09 | 1.17 | 1.15 | 1.28 | 1.25 | 1.32 |
| Q9Y2W1 | Thyroid hormone receptor-associated protein 3       | THRAP3 | 248  | S | 1     | 110.9 | 1.27 | 1.31 | 1.24 | 1.13 | 1.14 | 1.13 | 1.46 | 1.44 | 1.48 |
| Q9Y2W1 | Thyroid hormone receptor-associated protein 3       | THRAP3 | 253  | S | 1     | 110.9 | 3.18 | 3.17 | 3.22 | 4.02 | 4.42 | 1.36 | 1.00 | 0.77 | NaN  |
| Q9Y2W1 | Thyroid hormone receptor-associated protein 3       | THRAP3 | 379  | S | 1     | 205.9 | 2.03 | 2.78 | 2.77 | 1.99 | 2.36 | NaN  | 2.66 | 2.44 | 2.60 |
| Q9Y2W1 | Thyroid hormone receptor-associated protein 3       | THRAP3 | 682  | S | 0.999 | 155.5 | 1.05 | 1.10 | 1.10 | 1.02 | 1.08 | 1.08 | 1.28 | 1.13 | 1.34 |
| Q9Y2W1 | Thyroid hormone receptor-associated protein 3       | THRAP3 | 575  | S | 1     | 65.81 | 0.98 | 1.09 | 1.32 | 1.94 | 1.81 | 1.55 | 1.67 | 1.56 | NaN  |
| Q9Y2W1 | Thyroid hormone receptor-associated protein 3       | THRAP3 | 672  | S | 1     | 66.71 | 0.90 | 0.97 | 0.93 | 0.87 | NaN  | 0.90 | 0.97 | 0.97 | 1.01 |
| Q9Y2W1 | Thyroid hormone receptor-associated protein 3       | THRAP3 | 535  | S | 0.995 | 91.32 | 0.99 | NaN  | NaN  | 0.94 | NaN  | NaN  | 1.21 | NaN  | 1.09 |
| Q9Y2W1 | Thyroid hormone receptor-associated protein 3       | THRAP3 | 55   | S | 0.994 | 76.28 | 0.42 | NaN  | NaN  | NaN  | 0.50 | NaN  | 0.42 | 0.45 | 0.48 |
| Q9Y2X3 | Nucleolar protein 58                                | NOP58  | 502  | S | 1     | 168.5 | 0.89 | 0.88 | 0.89 | 0.74 | 0.66 | 0.67 | 1.15 | 0.90 | 1.03 |
| Q9Y2X3 | Nucleolar protein 58                                | NOP58  | 514  | S | 1     | 168.5 | 1.13 | 1.09 | 1.01 | 1.58 | 2.58 | 1.32 | 0.73 | 0.78 | 0.97 |
| Q9Y3E7 | Charged multivesicular body protein 3               | CHMP3  | 200  | S | 1     | 153   | 1.02 | 1.02 | NaN  | NaN  | NaN  | NaN  | NaN  | NaN  | NaN  |
| Q9Y3F4 | Serine-threonine kinase receptor-associated protein | STRAP  | 335  | S | 0.998 | 110   | NaN  | 3.32 | NaN  | 2.27 | NaN  | 2.22 | 1.34 | 1.65 | NaN  |
| Q9Y3F4 | Serine-threonine kinase receptor-associated protein | STRAP  | 338  | S | 0.998 | 110   | NaN  | 3.32 | NaN  | 2.27 | NaN  | 2.22 | 1.34 | 1.65 | NaN  |
| Q9Y3T9 | Nucleolar complex protein 2 homolog                 | NOC2L  | 672  | S | 1     | 218.4 | 1.20 | NaN  | NaN  | 1.13 | 1.13 | NaN  | NaN  | 1.05 | NaN  |
| Q9Y3T9 | Nucleolar complex protein 2 homolog                 | NOC2L  | 673  | S | 1     | 218.4 | 1.20 | NaN  | NaN  | 1.13 | 1.13 | NaN  | NaN  | 1.05 | NaN  |
| Q9Y3T9 | Nucleolar complex protein 2 homolog                 | NOC2L  | 49   | S | 1     | 78.65 | 0.67 | 0.73 | 0.71 | 0.97 | 1.04 | 0.57 | 0.90 | 0.83 | 0.96 |
| Q9Y3T9 | Nucleolar complex protein 2 homolog                 | NOC2L  | 56   | S | 0.885 | 78.65 | 1.49 | NaN  | NaN  | NaN  | 1.30 | 1.38 | 0.59 | NaN  | NaN  |
| Q9Y426 | C2 domain-containing protein                        | C2CD2  | 438  | S | 0.608 | 52.73 | 0.88 | 1.11 | NaN  | NaN  | NaN  | NaN  | 0.84 | NaN  | NaN  |
| Q9Y490 | Talin-1                                             | TLN1   | 425  | S | 0.996 | 161   | 0.74 | NaN  | NaN  | 1.63 | 1.74 | NaN  | NaN  | NaN  | NaN  |
| Q9Y4B5 | Microtubule cross-linking factor 1                  | MTCL1  | 756  | S | 0.947 | 81.2  | 0.32 | NaN  | 0.37 | 0.56 | 0.51 | NaN  | NaN  | 0.46 | 0.42 |
| Q9Y4B5 | Microtubule cross-linking factor 1                  | MTCL1  | 1421 | S | 1     | 80.53 | 0.84 | 0.90 | 0.77 | 0.99 | 0.97 | 0.94 | 0.86 | 0.89 | 0.79 |
| Q9Y4B5 | Microtubule cross-linking factor 1                  | MTCL1  | 263  | S | 1     | 90.53 | 1.04 | 1.01 | 1.17 | 1.40 | 1.34 | 1.31 | 1.22 | 1.26 | 1.47 |
| Q9Y4B5 | Microtubule cross-linking factor 1                  | MTCL1  | 306  | S | 1     | 65.09 | NaN  | 0.71 | 0.59 | NaN  | NaN  | 0.72 | 0.78 | 0.82 | 0.78 |

|        |                                                             |         |      |   |       |       |      |      |      |      |      |      |      |      |      |
|--------|-------------------------------------------------------------|---------|------|---|-------|-------|------|------|------|------|------|------|------|------|------|
| Q9Y4B5 | Microtubule cross-linking factor 1                          | MTCL1   | 1812 | S | 1     | 80.54 | 0.76 | NaN  | 0.80 | 1.11 | 0.95 | NaN  | 0.83 | 0.92 | 0.80 |
| Q9Y4B5 | Microtubule cross-linking factor 1                          | MTCL1   | 1814 | S | 1     | 80.54 | 0.76 | NaN  | 0.80 | 1.11 | 0.95 | NaN  | 0.83 | 0.92 | 0.80 |
| Q9Y4B5 | Microtubule cross-linking factor 1                          | MTCL1   | 776  | S | 1     | 215.1 | 0.76 | 0.81 | NaN  | NaN  | NaN  | 0.85 | NaN  | NaN  | 0.67 |
| Q9Y4B5 | Microtubule cross-linking factor 1                          | MTCL1   | 549  | S | 0.994 | 67.5  | NaN  | NaN  | 0.94 | 1.44 | NaN  | 1.46 | NaN  | NaN  | 0.82 |
| Q9Y4G2 | Pleckstrin homology domain-containing family M member 1     | PLEKHM1 | 435  | S | 0.778 | 80.78 | NaN  | NaN  | NaN  | 0.78 | NaN  | 1.24 | NaN  | NaN  | NaN  |
| Q9Y4H2 | Insulin receptor substrate 2                                | IRS2    | 730  | S | 0.592 | 111.8 | 1.41 | 1.88 | NaN  | NaN  | NaN  | NaN  | NaN  | NaN  | NaN  |
| Q9Y4H2 | Insulin receptor substrate 2                                | IRS2    | 731  | S | 0.948 | 183.8 | NaN  | 1.24 | NaN  | 1.30 | 0.94 | 0.86 | NaN  | NaN  | NaN  |
| Q9Y4H2 | Insulin receptor substrate 2                                | IRS2    | 735  | S | 0.864 | 183.8 | 1.20 | 1.88 | 1.08 | 0.91 | 2.53 | NaN  | 0.94 | 0.97 | 0.86 |
| Q9Y4H2 | Insulin receptor substrate 2                                | IRS2    | 1203 | S | 0.866 | 217.7 | 2.25 | 1.93 | 2.40 | NaN  | 1.62 | NaN  | NaN  | NaN  | NaN  |
| Q9Y4H2 | Insulin receptor substrate 2                                | IRS2    | 973  | S | 0.852 | 102.6 | 0.79 | 0.87 | NaN  | NaN  | NaN  | NaN  | NaN  | 0.81 | NaN  |
| Q9Y4H2 | Insulin receptor substrate 2                                | IRS2    | 976  | S | 0.867 | 69.98 | NaN  | NaN  | NaN  | 0.74 | 0.72 | NaN  | 0.92 | NaN  | NaN  |
| Q9Y4P1 | Cysteine protease ATG4B WD repeat domain                    | ATG4B   | 383  | S | 1     | 158.4 | 1.27 | 1.33 | NaN  | 1.52 | 1.21 | 1.27 | 1.36 | 1.36 | NaN  |
| Q9Y4P8 | phosphoinositide-interacting protein 2                      | WIPI2   | 412  | S | 0.7   | 139   | 0.83 | NaN  | 0.73 | 0.83 | NaN  | 0.82 | 1.07 | NaN  | 1.05 |
| Q9Y5B6 | PAX3- and PAX7-binding protein 1                            | PAXBP1  | 262  | S | 1     | 84.67 | 1.11 | 1.16 | NaN  | 1.02 | 1.18 | 1.09 | NaN  | NaN  | 0.96 |
| Q9Y5J1 | U3 small nucleolar RNA-associated protein 18 homolog        | UTP18   | 206  | S | 0.999 | 245.6 | 0.68 | NaN  | NaN  | 0.89 | 0.82 | NaN  | NaN  | 0.87 | NaN  |
| Q9Y5J1 | U3 small nucleolar RNA-associated protein 18 homolog        | UTP18   | 210  | S | 1     | 245.6 | 0.71 | 0.79 | 0.94 | 0.84 | 0.82 | 0.83 | 0.79 | 0.95 | 0.90 |
| Q9Y5J1 | U3 small nucleolar RNA-associated protein 18 homolog        | UTP18   | 121  | S | 1     | 271.7 | 0.69 | 0.71 | 0.77 | 0.79 | 0.77 | 0.72 | 0.66 | 0.63 | 0.67 |
| Q9Y5J1 | U3 small nucleolar RNA-associated protein 18 homolog        | UTP18   | 124  | S | 1     | 183.6 | 0.83 | 0.57 | 0.49 | 0.49 | 0.52 | 0.54 | 0.68 | 0.76 | 0.78 |
| Q9Y5T5 | Ubiquitin carboxyl-terminal hydrolase 16                    | USP16   | 415  | S | 1     | 197.3 | 0.59 | 0.64 | 0.56 | 0.69 | 0.58 | 0.58 | 0.77 | 0.80 | 0.66 |
| Q9Y5T5 | Ubiquitin carboxyl-terminal hydrolase 16                    | USP16   | 552  | S | 0.748 | 190   | 0.55 | 0.64 | NaN  | NaN  | NaN  | NaN  | NaN  | NaN  | NaN  |
| Q9Y608 | Leucine-rich repeat flightless-interacting protein 2        | LRRFIP2 | 260  | S | 0.999 | 70.06 | NaN  | NaN  | 2.03 | 1.61 | 1.28 | 1.54 | 3.46 | 3.85 | 4.08 |
| Q9Y608 | Leucine-rich repeat flightless-interacting protein 2        | LRRFIP2 | 328  | S | 1     | 254.2 | 1.07 | 1.10 | 1.03 | 0.90 | 0.93 | 0.88 | 1.09 | 1.07 | NaN  |
| Q9Y608 | Leucine-rich repeat flightless-interacting protein 2        | LRRFIP2 | 320  | S | 0.817 | 109   | NaN  | NaN  | NaN  | NaN  | NaN  | NaN  | 2.43 | 1.76 | NaN  |
| Q9Y613 | FH1/FH2 domain-containing protein 1                         | FHOD1   | 523  | S | 1     | 51.98 | 3.30 | 2.88 | NaN  | NaN  | NaN  | NaN  | NaN  | NaN  | NaN  |
| Q9Y6D5 | Brefeldin A-inhibited guanine nucleotide-exchange protein 2 | ARFGEF2 | 218  | S | 0.999 | 133.7 | 1.76 | 1.76 | 1.65 | 1.50 | 1.47 | 1.60 | 1.28 | 1.38 | 1.34 |
| Q9Y6D5 | Brefeldin A-inhibited guanine nucleotide-exchange protein 2 | ARFGEF2 | 227  | S | 1     | 133.7 | 1.76 | 1.76 | 1.65 | 1.50 | 1.47 | 1.60 | 1.28 | 1.38 | 1.34 |

|            |                                                                                                                                                                                                           |         |         |   |       |       |      |      |      |      |      |      |      |      |      |
|------------|-----------------------------------------------------------------------------------------------------------------------------------------------------------------------------------------------------------|---------|---------|---|-------|-------|------|------|------|------|------|------|------|------|------|
| Q9Y6D5     | Brefeldin A-inhibited guanine nucleotide-exchange protein 2                                                                                                                                               | ARFGEF2 | 1528    | S | 1     | 133.9 | NaN  | NaN  | NaN  | NaN  | 0.81 | 1.21 | 1.34 | NaN  | 1.46 |
| Q9Y6D5     | Brefeldin A-inhibited guanine nucleotide-exchange protein 2                                                                                                                                               | ARFGEF2 | 349     | S | 0.704 | 77.36 | NaN  | 0.82 | NaN  | NaN  | NaN  | NaN  | 1.13 | 1.22 | NaN  |
| Q9Y6I3     | Epsin-1                                                                                                                                                                                                   | EPN1    | 435     | S | 1     | 103.9 | NaN  | NaN  | NaN  | 3.19 | 2.66 | NaN  | NaN  | NaN  | NaN  |
| Q9Y6Q9     | Nuclear receptor coactivator 3                                                                                                                                                                            | NCOA3   | 728     | S | 1     | 66.57 | NaN  | 2.08 | 1.70 | 2.47 | 2.96 | 1.64 | 0.80 | 1.19 | 0.86 |
| Q9Y6X9     | MORC family CW-type zinc finger protein 2                                                                                                                                                                 | MORC2   | 615     | S | 1     | 43.12 | 0.71 | 0.54 | NaN  | NaN  | NaN  | NaN  | NaN  | NaN  | NaN  |
| S5FZ81     |                                                                                                                                                                                                           | PHF10   | 376     | S | 0.999 | 45.14 | 0.86 | NaN  | NaN  | NaN  | 1.23 | 0.87 | 0.93 | 1.57 | NaN  |
| S5FZ81     | PHD finger protein 10                                                                                                                                                                                     | PHF10   | 297     | S | 1     | 119.9 | 0.81 | 0.58 | 0.81 | NaN  | 0.89 | 0.53 | 0.71 | 0.93 | 0.77 |
| S5FZ81     | PHD finger protein 10                                                                                                                                                                                     | PHF10   | 301     | S | 1     | 119.9 | 0.81 | 0.58 | 0.81 | NaN  | 0.89 | 0.53 | 0.71 | 0.93 | 0.77 |
| E7ER32     | MKL/myocardin-like protein 1                                                                                                                                                                              | MKL1    | 450     | T | 0.98  | 172.9 | 1.26 | 1.45 | NaN  | NaN  | NaN  | NaN  | NaN  | NaN  | NaN  |
| A0A087WUZ3 | Spectrin beta chain, non-erythrocytic 1                                                                                                                                                                   | SPTBN1  | 2161    | T | 0.806 | 107.4 | NaN  | 0.65 | NaN  | 0.74 | 0.87 | 0.76 | 1.12 | 1.06 | 0.96 |
| A0A087WVA8 | Testis-expressed sequence 2 protein                                                                                                                                                                       | TEX2    | 269     | T | 0.836 | 116.8 | NaN  | NaN  | NaN  | NaN  | 1.25 | 1.35 | NaN  | 0.90 | NaN  |
| Q15136     | cAMP-dependent protein kinase catalytic subunit beta;cAMP-dependent protein kinase catalytic subunit gamma;cAMP-dependent protein kinase catalytic subunit 26S proteasome non-ATPase regulatory subunit 1 | KIN27   | 181     | T | 1     | 216.2 | 1.24 | 1.00 | 1.10 | 1.29 | NaN  | NaN  | 0.80 | 0.87 | 1.01 |
| A0A087WW66 | 26S proteasome non-ATPase regulatory subunit 1                                                                                                                                                            | PSMD1   | 311     | T | 0.998 | 84.95 | NaN  | 0.95 | 0.95 | 1.04 | 1.08 | 1.22 | 1.01 | 0.98 | 1.26 |
| A0A087WW66 | 26S proteasome non-ATPase regulatory subunit 1                                                                                                                                                            | PSMD1   | 273     | T | 1     | 218   | 1.72 | 1.62 | NaN  | 2.09 | 2.25 | NaN  | NaN  | NaN  | NaN  |
| A0A087WWA3 | Kinesin-like protein;Kinesin-like protein KIF1B                                                                                                                                                           | KIF1B   | 1049    | T | 0.972 | 46.76 | 0.70 | 0.64 | NaN  | NaN  | NaN  | NaN  | NaN  | NaN  | NaN  |
| A0A087WWA3 | Kinesin-like protein;Kinesin-like protein KIF1B                                                                                                                                                           | KIF1B   | 1426    | T | 0.804 | 69.82 | NaN  | 0.48 | 0.62 | NaN  | NaN  | NaN  | NaN  | NaN  | NaN  |
| A0A087WWJ1 | DNA mismatch repair protein Msh6                                                                                                                                                                          | MSH6    | 923     | T | 0.987 | 64.04 | NaN  | NaN  | NaN  | 1.29 | 1.28 | NaN  | 0.53 | NaN  | NaN  |
| A0A499FJY3 | Putative RNA-binding protein 15                                                                                                                                                                           | RBM15   | 524     | T | 1     | 76.68 | 0.88 | 0.87 | 0.76 | 0.82 | 0.88 | 0.83 | 0.89 | 0.89 | 0.92 |
| A0A087WWY2 |                                                                                                                                                                                                           | FOLR2   | 157     | T | 0.964 | 48.11 | 0.80 | 0.67 | NaN  | NaN  | 0.73 | NaN  | 0.81 | 0.98 | NaN  |
| A0A087WWY2 |                                                                                                                                                                                                           | FOLR2   | 160     | T | 0.963 | 48.11 | 0.80 | 0.67 | NaN  | NaN  | 0.73 | NaN  | 0.81 | 0.98 | NaN  |
| A0A087WZ13 | Ribonucleoprotein PTB-binding 1                                                                                                                                                                           | RAVER1  | 463     | T | 1     | 81.79 | 1.77 | 1.88 | NaN  | 1.79 | 1.84 | NaN  | NaN  | 1.39 | NaN  |
| B7Z385     | Adenylyl cyclase-associated protein;Adenylyl cyclase-associated protein 2                                                                                                                                 | CAP2    | 199     | T | 0.711 | 121.6 | NaN  | 0.48 | NaN  | 0.86 | 0.66 | NaN  | 0.56 | 0.54 | NaN  |
| A0A087X1A5 | Double-stranded RNA-binding protein Staufen homolog 1                                                                                                                                                     | STAU1   | 196     | T | 0.615 | 56.37 | 1.44 | 1.23 | 1.63 | NaN  | NaN  | 2.32 | NaN  | NaN  | NaN  |
| E9PL71     | Elongation factor 1-delta WASH complex subunit                                                                                                                                                            | EEF1D   | 123     | T | 1     | 359   | 1.18 | 1.20 | 1.12 | 1.45 | 1.45 | 1.50 | 1.91 | 1.31 | 1.35 |
| F8W7U3     | FAM21C;WASH complex subunit FAM21A                                                                                                                                                                        | FAM21C  | 331;243 | T | 1     | 98.76 | 1.10 | 1.12 | 1.31 | 1.19 | 1.00 | 1.14 | 1.01 | 1.21 | 1.10 |

|            |                                                                                                                 |          |      |   |       |       |      |      |      |      |      |      |      |      |      |
|------------|-----------------------------------------------------------------------------------------------------------------|----------|------|---|-------|-------|------|------|------|------|------|------|------|------|------|
| Q5JSD2     | Voltage-dependent anion-selective channel protein 2                                                             | VDAC2    | 113  | T | 0.691 | 73.31 | NaN  | NaN  | NaN  | 0.70 | 0.70 | NaN  | NaN  | NaN  | NaN  |
| A0A0A0MRW1 | Protein FAM219A                                                                                                 | FAM219A  | 84   | T | 1     | 172.4 | 1.06 | 1.19 | NaN  | 1.84 | NaN  | 1.26 | NaN  | 0.82 | 1.11 |
| A0A0A0MSK5 | Torsin-1A-interacting protein 1                                                                                 | TOR1AIP1 | 99   | T | 1     | 185   | 2.19 | 2.16 | NaN  | NaN  | NaN  | NaN  | 2.16 | 1.49 | NaN  |
| K7EP41     | Glucose-6-phosphate isomerase                                                                                   | GPI      | 109  | T | 0.98  | 49.24 | 1.17 | NaN  | 1.12 | NaN  | NaN  | 0.93 | NaN  | 1.13 | 1.37 |
| F8WF49     | Disks large-associated protein 4                                                                                | DLGAP4   | 221  | T | 1     | 105.8 | 1.00 | 1.36 | NaN  | 1.28 | 1.67 | NaN  | 1.46 | 1.25 | NaN  |
| A0A2R8YCY2 | Protein furry homolog                                                                                           | FRY      | 1920 | T | 0.522 | 47.65 | NaN  | NaN  | NaN  | 0.79 | 0.82 | NaN  | NaN  | 0.86 | NaN  |
| A0A0C4DH22 | Band 4.1-like protein 1                                                                                         | EPB41L1  | 475  | T | 0.995 | 119.9 | NaN  | NaN  | 1.58 | 1.33 | 1.38 | 1.16 | 0.95 | 0.96 | 0.95 |
| Q5QPR4     | Cyclin-dependent kinase 11A;Cyclin-dependent kinase 11B                                                         | CDK11A   | 702  | T | 0.542 | 98.7  | 1.25 | 1.29 | 1.60 | 1.12 | NaN  | NaN  | 1.13 | NaN  | NaN  |
| A0A0D9SEV0 | Bitfunctional polynucleotide phosphatase/kinase;Polynucleotide 3'-phosphatase;Polynucleotide 5'-hydroxyl-kinase | PNKP     | 118  | T | 1     | 174.5 | 0.57 | 0.63 | 0.52 | 0.64 | 0.50 | 0.62 | 0.78 | 0.61 | 0.75 |
| H7C3Z6     | Mitogen-activated protein kinase kinase kinase 4                                                                | MAP4K4   | 240  | T | 0.705 | 54.2  | NaN  | NaN  | NaN  | NaN  | NaN  | NaN  | NaN  | 1.03 | 1.16 |
| A0A0G2JMS7 | Protein scribble homolog                                                                                        | SCRIB    | 1468 | T | 0.937 | 101.5 | NaN  | NaN  | NaN  | NaN  | NaN  | NaN  | 1.44 | NaN  | 1.33 |
| A0A0J9YWL0 | Absent in melanoma 1 protein                                                                                    | AIM1     | 933  | T | 0.813 | 72.91 | 0.58 | NaN  | 0.69 | NaN  | NaN  | NaN  | 0.75 | NaN  | 1.01 |
| A0A1B0GTL5 |                                                                                                                 |          | 899  | T | 0.887 | 95.07 | 1.04 | 1.05 | 1.21 | 1.13 | NaN  | 1.10 | 1.28 | 1.26 | 1.23 |
| A0A1B0GUM1 | Pleckstrin homology domain-containing family A member 7                                                         | PLEKHA7  | 91   | T | 0.541 | 92.73 | 0.51 | 1.04 | 0.69 | NaN  | NaN  | NaN  | NaN  | NaN  | NaN  |
| H0YN01     | Talin-2                                                                                                         | TLN2     | 236  | T | 1     | 94.36 | 1.42 | 0.78 | 0.73 | 0.75 | 0.74 | 0.71 | 1.13 | 1.09 | 1.05 |
| B4DP61     | Survival motor neuron protein                                                                                   | SMN2     | 25   | T | 0.809 | 132.5 | NaN  | 2.60 | NaN  | 2.50 | 1.05 | 1.04 | 0.96 | 0.99 | 0.99 |
| A0A2R8YF61 | Cyclin-dependent kinase 13                                                                                      | CDK13    | 649  | T | 1     | 82.55 | 0.95 | 1.10 | 1.28 | 1.24 | 1.24 | 1.18 | 1.30 | 1.40 | 1.10 |
| A0A2R8Y4Z8 | Coiled-coil domain-containing protein 9                                                                         | CCDC9    | 389  | T | 0.714 | 98.77 | 0.82 | 0.80 | NaN  | 0.80 | NaN  | 0.98 | NaN  | NaN  | 0.78 |
| H0YH87     | Ataxin-2                                                                                                        | ATXN2    | 581  | T | 0.997 | 64.73 | 2.07 | NaN  | 0.61 | 1.90 | 1.81 | 2.31 | 1.91 | 1.61 | 1.67 |
| H0Y470     | Girdin                                                                                                          | CCDC88A  | 690  | T | 0.592 | 230.1 | NaN  | 0.66 | NaN  | 0.82 | NaN  | 0.77 | NaN  | NaN  | 0.77 |
| F8WF45     | TATA element modulatory factor                                                                                  | TMF1     | 401  | T | 0.789 | 139.8 | NaN  | NaN  | NaN  | NaN  | 1.08 | NaN  | NaN  | 1.29 | 1.08 |
| C9JBX5     | Translocon-associated protein subunit alpha                                                                     | SSR1     | 192  | T | 0.644 | 62.41 | 1.90 | NaN  | NaN  | NaN  | NaN  | 2.08 | 0.95 | NaN  | 0.91 |
| A0A3B3ISN0 |                                                                                                                 |          | 192  | T | 0.985 | 81.77 | 2.13 | 2.28 | 2.43 | NaN  | 1.10 | 1.03 | 3.04 | 3.11 | 3.13 |
| A0A3F2YNX0 | Protein transport protein Sec16A                                                                                | SEC16A   | 415  | T | 0.917 | 130.9 | 0.73 | NaN  | NaN  | 0.63 | 1.04 | NaN  | 1.10 | NaN  | NaN  |
| A0A494BZT8 | Transforming acidic coiled-coil-containing protein 3                                                            | TACC3    | 249  | T | 0.573 | 73.46 | NaN  | 2.32 | NaN  | NaN  | 3.19 | 3.22 | NaN  | NaN  | NaN  |
| D6RC77     | Phosphoacetylglucosamine mutase                                                                                 | PGM3     | 90   | T | 0.87  | 124.1 | NaN  | NaN  | 0.46 | NaN  | 0.69 | 0.84 | 0.38 | NaN  | NaN  |
| A0A494C1F2 | Nuclear pore complex protein Nup214                                                                             | NUP214   | 437  | T | 0.947 | 91.66 | 1.39 | NaN  | 1.62 | 1.59 | NaN  | 1.50 | 1.70 | NaN  | 1.33 |

|        |                                                                     |         |      |   |       |       |      |      |      |      |       |       |      |      |      |
|--------|---------------------------------------------------------------------|---------|------|---|-------|-------|------|------|------|------|-------|-------|------|------|------|
| Q7Z6P5 | DNA replication licensing factor MCM3                               | MCM3    | 217  | T | 1     | 153.3 | 0.37 | 0.40 | 0.42 | 0.62 | 0.65  | 0.67  | 0.36 | 0.41 | NaN  |
| P07355 | Annexin A2;Putative annexin A2-like protein;Annexin                 | ANXA2   | 19   | T | 0.992 | 220.9 | 7.38 | 6.29 | 6.83 | NaN  | 11.44 | 11.86 | 0.65 | 0.65 | 0.65 |
| A9Z1X7 | Serine/arginine repetitive matrix protein 1                         | SRRM1   | 802  | T | 1     | 61.1  | 0.67 | 0.70 | NaN  | NaN  | 0.82  | 0.85  | NaN  | 1.06 | NaN  |
| A9Z1X7 | Serine/arginine repetitive matrix protein 1                         | SRRM1   | 220  | T | 1     | 146.3 | 0.99 | 1.01 | 0.97 | 0.95 | 0.96  | 0.96  | 1.01 | 1.00 | 1.05 |
| A9Z1X7 | Serine/arginine repetitive matrix protein 1                         | SRRM1   | 401  | T | 1     | 109.5 | 1.68 | 1.63 | 1.46 | 1.30 | 1.17  | 1.36  | 1.34 | 1.37 | 1.48 |
| A9Z1X7 | Serine/arginine repetitive matrix protein 1                         | SRRM1   | 881  | T | 1     | 180   | 1.88 | 1.64 | 2.18 | 1.86 | 1.43  | 1.43  | 2.55 | 1.30 | 1.94 |
| A9Z1X7 | Serine/arginine repetitive matrix protein 1                         | SRRM1   | 590  | T | 1     | 65.88 | 1.15 | 1.15 | 1.31 | 1.14 | 1.19  | 1.24  | 1.24 | 1.27 | 1.32 |
| A9Z1X7 | Serine/arginine repetitive matrix protein 1                         | SRRM1   | 581  | T | 1     | 68    | 1.15 | 1.25 | 1.22 | 1.10 | 1.11  | 1.10  | 1.15 | 1.17 | 1.20 |
| A9Z1X7 | Serine/arginine repetitive matrix protein 1                         | SRRM1   | 583  | T | 1     | 68    | 1.15 | 1.25 | 1.22 | 1.10 | 1.11  | 1.10  | 1.15 | 1.17 | 1.20 |
| A9Z1X7 | Serine/arginine repetitive matrix protein 1                         | SRRM1   | 623  | T | 1     | 106.3 | 1.24 | 1.32 | 1.34 | 0.93 | 1.18  | 1.14  | 0.90 | 1.26 | 1.27 |
| H0YCM0 | Non-specific serine/threonine kinase;Serine/threonine-              | PAK1    | 121  | T | 0.769 | 79.36 | NaN  | NaN  | NaN  | NaN  | NaN   | NaN   | 0.92 | 0.87 | NaN  |
| E7EX54 | Mitogen-activated protein kinase 14                                 | MAPK14  | 103  | T | 0.905 | 109.2 | NaN  | NaN  | NaN  | 0.91 | 1.15  | NaN   | NaN  | NaN  | NaN  |
| B5MBZ0 | Echinoderm microtubule-associated protein-like 4                    | EML4    | 910  | T | 0.995 | 130.4 | NaN  | NaN  | 0.85 | 0.92 | NaN   | NaN   | 1.21 | NaN  | 1.20 |
| F8VRJ2 | Nucleosome assembly protein 1-like 1                                | NAP1L1  | 21   | T | 1     | 185   | 3.75 | 3.40 | NaN  | NaN  | 3.56  | 2.34  | 1.11 | NaN  | NaN  |
| C9J1H7 | Nucleolin                                                           | NCL     | 53   | T | 0.92  | 87.9  | NaN  | NaN  | NaN  | 1.29 | 1.29  | NaN   | 0.53 | 0.53 | NaN  |
| C9J6P4 | Zinc finger CCCH-type antiviral protein 1                           | ZC3HAV1 | 273  | T | 0.998 | 94.02 | NaN  | 1.15 | NaN  | 1.16 | NaN   | 0.80  | NaN  | NaN  | NaN  |
| C9JC20 | NCK-interacting protein with SH3 domain                             | NCKIPSD | 65   | T | 0.918 | 50.48 | NaN  | NaN  | NaN  | NaN  | NaN   | NaN   | 1.17 | 1.15 | NaN  |
| E7EV54 | Proline-, glutamic acid- and leucine-rich protein 1                 | PELP1   | 598  | T | 0.941 | 98.8  | NaN  | 1.14 | 0.88 | NaN  | 0.97  | NaN   | 1.36 | NaN  | 1.18 |
| C9JN71 | Zinc finger protein 878                                             | ZNF878  | 216  | T | 0.851 | 62.24 | NaN  | NaN  | 0.55 | 1.02 | 0.67  | 0.53  | 0.62 | 0.90 | 0.67 |
| C9JN71 | Zinc finger protein 878                                             | ZNF878  | 222  | T | 0.997 | 62.24 | NaN  | NaN  | 0.55 | 1.02 | 0.67  | 0.53  | 0.62 | 0.90 | 0.67 |
| C9K0J5 | Ras-associated and pleckstrin homology domains-containing protein 1 | RAPH1   | 1205 | T | 0.623 | 77.52 | NaN  | 1.77 | NaN  | 1.84 | 1.49  | NaN   | 0.86 | 0.98 | 0.84 |
| H0Y3P2 | Eukaryotic translation initiation factor 4 gamma 2                  | EIF4G2  | 468  | T | 0.713 | 89.91 | NaN  | NaN  | NaN  | 1.01 | NaN   | 1.26  | 1.32 | 1.37 | NaN  |
| H0Y3P2 | Eukaryotic translation initiation factor 4 gamma 2                  | EIF4G2  | 470  | T | 1     | 117.4 | NaN  | NaN  | 1.17 | 1.13 | 1.12  | 1.25  | 1.38 | 1.23 | 1.27 |



|        |                                                                                                                                |          |      |   |       |       |      |      |      |      |      |      |      |      |      |
|--------|--------------------------------------------------------------------------------------------------------------------------------|----------|------|---|-------|-------|------|------|------|------|------|------|------|------|------|
| H0Y9J2 | Calcium/calmodulin-dependent protein kinase type II subunit delta                                                              | CAMK2D   | 41   | T | 0.988 | 337.4 | 0.66 | 0.57 | NaN  | NaN  | NaN  | 0.88 | 0.71 | NaN  | 0.62 |
| D6REC6 | Cyclin-dependent kinase 7                                                                                                      | CDK7     | 77   | T | 0.999 | 65.84 | 0.66 | NaN  | 0.53 | 0.89 | 0.89 | 0.83 | 0.58 | 0.70 | 0.80 |
| D6RCF2 | Histone H2A;Core histone macro-H2A.1                                                                                           | H2AFY    | 129  | T | 1     | 58.67 | NaN  | 1.71 | NaN  | 3.88 | 3.61 | NaN  | NaN  | NaN  | NaN  |
| E3W994 | CLIP-associating protein 2                                                                                                     | CLASP2   | 573  | T | 0.677 | 96.81 | 1.76 | 2.06 | 1.62 | 1.92 | NaN  | NaN  | 1.26 | 1.83 | 1.63 |
| E5RHT6 | ADP-ribosylation factor GTPase-activating protein 1                                                                            | ARFGAP1  | 61   | T | 1     | 67.99 | NaN  | 1.71 | 1.78 | 1.36 | 1.86 | NaN  | NaN  | 2.80 | NaN  |
| E7ERH2 | S-phase kinase-associated protein 1                                                                                            | SKP1     | 131  | T | 1     | 58.34 | 0.71 | NaN  | 0.96 | NaN  | NaN  | NaN  | 1.24 | 1.13 | 1.19 |
| E7EV99 | Alpha-adducin                                                                                                                  | ADD1     | 11   | T | 0.586 | 67.9  | 1.33 | 2.66 | NaN  | 3.03 | 2.74 | NaN  | NaN  | 0.76 | NaN  |
| E7EPK0 | LIM and calponin homology domains-containing protein 1                                                                         | LIMCH1   | 513  | T | 0.587 | 70.41 | 0.52 | 0.62 | NaN  | NaN  | NaN  | 0.82 | 0.91 | 1.16 | 0.64 |
| G3V1Q4 | Septin-7                                                                                                                       | 7-Sep    | 192  | T | 1     | 76.49 | 1.01 | 1.03 | 1.10 | 1.13 | 1.33 | 0.94 | 0.94 | 0.75 | 1.15 |
| E7EPN9 | Protein PRRC2C                                                                                                                 | PRRC2C   | 2675 | T | 1     | 126.3 | 3.68 | 3.80 | 4.05 | 2.84 | NaN  | 2.67 | NaN  | 2.41 | 2.35 |
| E7EPN9 | Protein PRRC2C                                                                                                                 | PRRC2C   | 2684 | T | 0.996 | 67.06 | NaN  | 3.56 | 3.34 | NaN  | NaN  | 2.20 | 2.38 | 2.06 | 2.34 |
| S4R3H4 | Apoptotic chromatin condensation inducer in the nucleus                                                                        | ACIN1    | 356  | T | 0.995 | 94.38 | NaN  | 0.83 | 1.32 | 1.25 | 1.14 | 1.27 | 1.06 | 0.91 | 1.08 |
| E7ESS4 | Intercellular adhesion molecule 1                                                                                              | ICAM1    | 308  | T | 0.999 | 73.93 | 0.67 | 0.59 | 0.70 | 1.58 | NaN  | 1.06 | NaN  | 0.53 | NaN  |
| E7EX17 | Eukaryotic translation initiation factor 4B                                                                                    | EIF4B    | 97   | T | 0.739 | 69.15 | NaN  | 1.41 | 1.41 | NaN  | NaN  | 1.34 | NaN  | 1.26 | NaN  |
| E7EX44 | Caldesmon                                                                                                                      | CALD1    | 552  | T | 0.794 | 56.75 | 0.99 | 1.11 | 1.06 | NaN  | 1.12 | 1.26 | 1.05 | 1.03 | NaN  |
| F8VZJ2 | Nascent polypeptide-associated complex subunit alpha;Nascent polypeptide-associated complex subunit alpha muscle-specific form | NACA     | 82   | T | 1     | 217.1 | 1.20 | 1.09 | 1.16 | 1.03 | 1.02 | 1.05 | 1.08 | NaN  | 1.11 |
| E9PFD7 | Receptor protein-tyrosine kinase;Epidermal growth factor receptor                                                              | EGFR     | 648  | T | 0.996 | 121.4 | NaN  | NaN  | NaN  | NaN  | NaN  | NaN  | 2.75 | NaN  | 2.86 |
| E9PHI6 | Cytoplasmic dynein 1 light intermediate chain 1                                                                                | DYNC1LI1 | 396  | T | 0.822 | 154.3 | NaN  | NaN  | 1.27 | 0.64 | NaN  | 1.18 | 0.95 | NaN  | 0.93 |
| E9PHI6 | Cytoplasmic dynein 1 light intermediate chain 1                                                                                | DYNC1LI1 | 397  | T | 0.985 | 147.5 | 0.94 | 0.91 | 1.57 | 1.70 | NaN  | 2.29 | NaN  | 0.76 | 0.82 |
| E9PHI6 | Cytoplasmic dynein 1 light intermediate chain 1                                                                                | DYNC1LI1 | 399  | T | 0.968 | 176.1 | NaN  | 0.91 | NaN  | 1.70 | 0.80 | NaN  | NaN  | NaN  | NaN  |
| E9PK52 | Band 4.1-like protein 2                                                                                                        | EPB41L2  | 600  | T | 0.531 | 58.07 | NaN  | NaN  | NaN  | 2.04 | 2.11 | NaN  | 0.86 | 0.96 | NaN  |
| E9PI52 | Arginine/serine-rich coiled-coil protein 2                                                                                     | RSRC2    | 16   | T | 0.772 | 79.01 | 0.83 | 0.95 | 1.04 | 0.97 | 1.10 | 0.81 | 1.29 | 0.88 | 1.41 |
| E9PSF4 | 40S ribosomal protein S3                                                                                                       | RPS3     | 95   | T | 0.996 | 167.9 | 1.74 | 1.96 | 2.35 | 2.12 | 1.77 | 2.17 | 2.05 | 1.77 | 2.01 |
| E9PMG1 | RalBP1-associated Eps domain-containing protein 1                                                                              | REPS1    | 173  | T | 0.722 | 132.6 | NaN  | NaN  | 0.75 | NaN  | 1.70 | 0.77 | NaN  | NaN  | 0.84 |
| E9PMS6 | LIM domain only protein 7                                                                                                      | LMO7     | 555  | T | 0.839 | 187.1 | 2.08 | 2.09 | 2.13 | 2.13 | 2.18 | NaN  | 1.43 | 1.18 | 1.55 |
| E9PMS6 | LIM domain only protein 7                                                                                                      | LMO7     | 613  | T | 1     | 68.84 | NaN  | 1.07 | 0.85 | NaN  | 1.14 | 1.47 | 0.64 | 0.73 | 0.71 |

|        |                                                                                                                                                      |              |         |   |       |       |      |      |      |      |      |      |      |      |      |
|--------|------------------------------------------------------------------------------------------------------------------------------------------------------|--------------|---------|---|-------|-------|------|------|------|------|------|------|------|------|------|
| E9PS23 | Cofilin-1                                                                                                                                            | CFL1         | 25      | T | 0.997 | 128.9 | 2.66 | 2.75 | 2.32 | 4.77 | NaN  | 4.42 | 0.93 | NaN  | 0.92 |
| F5H8D7 | DNA repair protein XRCC1<br>Ubiquitin carboxyl-terminal                                                                                              | XRCC1        | 422     | T | 0.999 | 115.3 | 0.51 | 0.54 | 0.61 | 0.75 | 0.69 | 0.70 | 0.90 | 0.87 | 0.93 |
| F8W6N3 | hydrolase;Ubiquitin carboxyl-<br>terminal hydrolase BAP1<br>Lamina-associated                                                                        | BAP1         | 499     | T | 0.876 | 63.23 | 1.01 | 0.69 | NaN  | NaN  | NaN  | 0.79 | 0.76 | 0.78 | NaN  |
| P42166 | polypeptide 2, isoforms<br>beta/gamma;Thymopoietin;Th<br>ymopentin;Lamina-associated<br>polypeptide 2, isoform<br>alpha;Thymopoietin;Thymope<br>ntin | TMPO         | 74;74   | T | 1     | 159.8 | 1.56 | 2.60 | 2.75 | 2.45 | 2.58 | 1.02 | 2.88 | 0.70 | 2.86 |
| H0Y4V9 | La-related protein 4B                                                                                                                                | LARP4B       | 84      | T | 0.953 | 107.2 | 1.63 | 1.35 | 1.22 | 1.06 | NaN  | 1.18 | 1.50 | 0.98 | 1.68 |
| H0Y4Z8 | Rab-like protein 6                                                                                                                                   | RABL6        | 600     | T | 1     | 150.5 | 1.19 | 1.15 | 1.46 | 1.34 | 1.06 | 1.09 | 1.17 | 1.36 | 1.28 |
| H0Y4Z8 | Rab-like protein 6                                                                                                                                   | RABL6        | 469     | T | 0.967 | 60.62 | 1.51 | 0.54 | NaN  | 0.65 | 1.35 | 1.58 | 1.10 | 0.49 | 1.23 |
| H0Y5S9 | Casein kinase I isoform                                                                                                                              | CSNK1E       | 65      | T | 0.5   | 88.16 | 0.79 | NaN  | NaN  | 0.97 | 0.79 | NaN  | 1.06 | 1.00 | 1.01 |
| H0Y6J7 |                                                                                                                                                      | PLXNB2       | 185     | T | 0.993 | 56.92 | 0.97 | 0.91 | 0.91 | 0.87 | 0.91 | NaN  | 1.04 | 1.06 | 1.08 |
| H7BZT5 | Zinc finger protein 185                                                                                                                              | ZNF185       | 206;450 | T | 0.935 | 187.5 | 0.92 | 0.88 | 0.87 | 0.92 | 0.91 | 0.80 | 1.38 | 1.39 | 1.24 |
| H7BZT5 | Zinc finger protein 185                                                                                                                              | ZNF185       | 272;516 | T | 0.963 | 199.6 | NaN  | 1.08 | 0.89 | NaN  | NaN  | 0.87 | NaN  | NaN  | 1.45 |
| H0YE35 | Synembryn-A                                                                                                                                          | RIC8A        | 49      | T | 0.989 | 243.2 | 0.93 | 1.03 | 0.95 | 1.15 | 0.74 | 1.11 | 1.02 | 1.06 | 1.00 |
| J3KPH4 | Sorting nexin-1                                                                                                                                      | SNX1         | 41      | T | 1     | 198.4 | 0.69 | 0.64 | 1.02 | 0.75 | 1.09 | 0.79 | 0.82 | 1.12 | 0.83 |
| H3BN50 |                                                                                                                                                      | SLC9A3R<br>2 | 8       | T | 1     | 152.7 | 2.12 | 1.93 | 2.11 | 1.43 | 1.46 | 1.41 | 2.07 | NaN  | 2.14 |
| H3BRW3 | Sulfhydryl oxidase;FAD-linked<br>sulfhydryl oxidase ALR                                                                                              | GFER         | 79      | T | 1     | 56.12 | NaN  | 0.75 | 0.77 | 0.90 | NaN  | NaN  | 1.23 | 0.86 | 1.15 |
| J3QLT7 | Nucleolar protein 3                                                                                                                                  | NOL3         | 72      | T | 0.995 | 186.2 | 1.24 | 0.70 | 0.85 | NaN  | 0.98 | 1.03 | 1.35 | 1.15 | 1.11 |
| H7BZT5 | Zinc finger protein 185                                                                                                                              | ZNF185       | 158     | T | 0.998 | 184.4 | 1.69 | 1.40 | 1.89 | 1.41 | 1.44 | 1.27 | 2.41 | 2.96 | 2.38 |
| H7C128 |                                                                                                                                                      | BRD8         | 255     | T | 1     | 85.53 | 0.73 | 0.61 | NaN  | 1.06 | 0.86 | NaN  | 1.06 | 0.82 | 0.88 |
| I3L467 | Unconventional prefoldin<br>RBP5 interactor 1                                                                                                        | URI1         | 5       | T | 0.838 | 46.98 | NaN  | NaN  | NaN  | 0.89 | NaN  | NaN  | 0.60 | 0.82 | NaN  |
| J3QLL0 | Importin subunit alpha-1                                                                                                                             | KPNA2        | 61      | T | 0.517 | 135.4 | NaN  | NaN  | NaN  | NaN  | NaN  | 4.44 | 0.76 | 0.67 | 0.84 |
| J3QK89 | Calcium homeostasis<br>endoplasmic reticulum protein                                                                                                 | CHERP        | 830     | T | 0.972 | 107   | 0.85 | 1.03 | 1.06 | NaN  | 0.87 | NaN  | 1.13 | 1.07 | 1.13 |
| J3QSD7 | Cyclin-dependent kinase 12                                                                                                                           | CDK12        | 691     | T | 1     | 58.68 | 0.68 | NaN  | 0.78 | 0.62 | 0.96 | 0.76 | 0.84 | 0.73 | 0.82 |
| K4DI93 | Cullin-4B                                                                                                                                            | CUL4B        | 36      | T | 0.73  | 76.05 | NaN  | 0.70 | NaN  | 1.22 | 1.11 | 1.29 | 0.71 | 0.61 | NaN  |
| K7ELG9 | Protein LSM12 homolog                                                                                                                                | LSM12        | 75      | T | 1     | 72.89 | 1.19 | 1.30 | NaN  | 1.30 | 0.97 | NaN  | NaN  | 2.35 | NaN  |
| K7EMR2 | Choline transporter-like protein<br>2                                                                                                                | SLC44A2      | 14      | T | 1     | 74.79 | 0.63 | 0.70 | 0.58 | 0.81 | NaN  | 0.69 | 0.70 | 0.91 | NaN  |
| M0QXD6 | General transcription factor IIF<br>subunit 1                                                                                                        | GTF2F1       | 305     | T | 0.929 | 90.96 | NaN  | 2.18 | 6.35 | NaN  | NaN  | NaN  | NaN  | NaN  | NaN  |
| M0QXD6 | General transcription factor IIF<br>subunit 1                                                                                                        | GTF2F1       | 247     | T | 1     | 68.13 | NaN  | 0.82 | 0.73 | 0.98 | 1.00 | 1.03 | 0.94 | 0.91 | 0.97 |
| M0QZ09 | NAD-dependent protein<br>deacetylase sirtuin-6                                                                                                       | SIRT6        | 220     | T | 1     | 66.6  | 1.30 | 1.10 | 1.15 | 1.17 | 0.96 | 1.10 | 1.03 | 0.86 | 1.09 |
| O00267 | Transcription elongation factor<br>SPT5                                                                                                              | SUPT5H       | 1034    | T | 0.981 | 69.76 | NaN  | NaN  | 1.81 | 3.84 | NaN  | NaN  | 0.64 | 0.95 | NaN  |



|        |                                                                                |        |      |   |       |       |      |      |      |      |      |      |      |      |      |
|--------|--------------------------------------------------------------------------------|--------|------|---|-------|-------|------|------|------|------|------|------|------|------|------|
| P17275 | Transcription factor jun-B                                                     | JUNB   | 255  | T | 1     | 140.3 | 4.31 | NaN  | NaN  | 0.99 | NaN  | 1.22 | NaN  | 5.63 | 5.63 |
| P18858 | DNA ligase 1;DNA ligase                                                        | LIG1   | 195  | T | 0.967 | 128.7 | 0.49 | 0.54 | NaN  | NaN  | 0.81 | NaN  | NaN  | NaN  | NaN  |
| P26641 | Elongation factor 1-gamma<br>Microtubule-associated protein                    | EEF1G  | 43   | T | 0.837 | 61.37 | 0.93 | 0.98 | NaN  | NaN  | NaN  | NaN  | NaN  | NaN  | NaN  |
| P27816 | 4;Microtubule-associated<br>protein                                            | MAP4   | 512  | T | 0.59  | 117.2 | 0.55 | 0.76 | NaN  | NaN  | 1.65 | 1.81 | NaN  | NaN  | 0.68 |
| P27816 | 4;Microtubule-associated<br>protein                                            | MAP4   | 521  | T | 1     | 279.1 | 0.65 | 0.65 | 0.66 | 0.85 | 0.85 | 0.90 | 0.78 | 1.10 | 0.80 |
| P27816 | Microtubule-associated protein<br>4                                            | MAP4   | 687  | T | 0.956 | 72.37 | NaN  | NaN  | NaN  | NaN  | NaN  | 0.53 | 0.83 | 0.81 | 1.08 |
| P27824 | Calnexin                                                                       | CANX   | 562  | T | 1     | 187.3 | 1.11 | 1.11 | 0.81 | 0.81 | 1.44 | 1.08 | 1.06 | 0.96 | 0.82 |
| P29966 | Myristoylated alanine-rich C-<br>kinase substrate                              | MARCKS | 143  | T | 1     | 213   | 1.04 | 1.42 | 1.15 | 2.23 | 2.69 | 1.67 | 1.05 | 1.07 | 0.75 |
| P29966 | Myristoylated alanine-rich C-<br>kinase substrate                              | MARCKS | 150  | T | 1     | 301.2 | 1.97 | 2.17 | 2.35 | 1.82 | 1.93 | 1.93 | 2.38 | 3.47 | 2.51 |
| P29966 | Myristoylated alanine-rich C-<br>kinase substrate                              | MARCKS | 120  | T | 0.731 | 170.9 | 2.78 | 2.75 | NaN  | NaN  | 0.76 | NaN  | NaN  | NaN  | NaN  |
| P29966 | Myristoylated alanine-rich C-<br>kinase substrate                              | MARCKS | 133  | T | 0.671 | 91.1  | NaN  | 1.14 | 1.39 | 0.68 | NaN  | NaN  | NaN  | NaN  | NaN  |
| P36507 | Dual specificity mitogen-<br>activated protein kinase kinase<br>2              | MAP2K2 | 394  | T | 1     | 144.6 | 1.24 | 1.31 | 1.24 | NaN  | NaN  | 1.17 | 1.50 | 1.43 | 1.54 |
| P41743 | Protein kinase C iota type<br>Probable 28S rRNA                                | PRKCI  | 564  | T | 1     | 186.1 | 0.56 | 0.94 | 0.88 | 0.75 | 0.77 | 0.76 | 0.82 | 0.89 | 0.77 |
| P46087 | (cytosine(4447)-C(5))-<br>methyltransferase                                    | NOP2   | 784  | T | 0.637 | 68.52 | 1.44 | NaN  | 1.33 | NaN  | NaN  | 1.97 | NaN  | NaN  | NaN  |
| P46821 | Microtubule-associated protein<br>1B;MAP1B heavy chain;MAP1<br>light chain LC1 | MAP1B  | 1067 | T | 0.97  | 102.2 | 1.10 | 1.31 | 1.42 | 2.20 | 2.41 | 2.38 | 1.37 | NaN  | 1.25 |
| P46821 | Microtubule-associated protein<br>1B;MAP1B heavy chain;MAP1<br>light chain LC1 | MAP1B  | 2305 | T | 0.73  | 43.81 | NaN  | NaN  | NaN  | NaN  | NaN  | 4.40 | 0.69 | NaN  | 1.00 |
| P46821 | Microtubule-associated protein<br>1B;MAP1B heavy chain;MAP1<br>light chain LC1 | MAP1B  | 704  | T | 1     | 51.01 | NaN  | 0.48 | NaN  | NaN  | 0.67 | NaN  | 0.80 | 0.79 | 0.80 |
| P46821 | Microtubule-associated protein<br>1B;MAP1B heavy chain;MAP1<br>light chain LC1 | MAP1B  | 1503 | T | 0.567 | 104.8 | NaN  | 0.71 | NaN  | 0.85 | 0.91 | NaN  | NaN  | 0.99 | NaN  |
| P46821 | Microtubule-associated protein<br>1B;MAP1B heavy chain;MAP1<br>light chain LC1 | MAP1B  | 1788 | T | 1     | 134.8 | 1.41 | 1.38 | 1.51 | 1.42 | 1.32 | 1.32 | 1.98 | 1.74 | 2.13 |
| P46821 | Microtubule-associated protein<br>1B;MAP1B heavy chain;MAP1<br>light chain LC1 | MAP1B  | 1282 | T | 1     | 122.1 | 2.11 | 1.79 | 2.11 | 3.51 | 3.23 | 3.00 | 0.81 | 1.06 | 0.76 |

|        |                                                                                |              |      |   |       |       |      |      |      |      |      |      |      |      |      |
|--------|--------------------------------------------------------------------------------|--------------|------|---|-------|-------|------|------|------|------|------|------|------|------|------|
| P46821 | Microtubule-associated protein<br>1B;MAP1B heavy chain;MAP1<br>light chain LC1 | MAP1B        | 1913 | T | 0.748 | 169.1 | 0.73 | 0.74 | 0.77 | 0.91 | NaN  | 0.85 | 0.89 | NaN  | 0.91 |
| P46821 | Microtubule-associated protein<br>1B;MAP1B heavy chain;MAP1<br>light chain LC1 | MAP1B        | 1930 | T | 0.541 | 139.8 | 1.08 | 0.94 | NaN  | NaN  | NaN  | 1.03 | 0.74 | NaN  | NaN  |
| P46821 | Microtubule-associated protein<br>1B;MAP1B heavy chain;MAP1<br>light chain LC1 | MAP1B        | 1932 | T | 0.985 | 125.4 | 1.19 | NaN  | NaN  | NaN  | NaN  | NaN  | 0.82 | NaN  | 0.83 |
| P46821 | Microtubule-associated protein<br>1B;MAP1B heavy chain;MAP1<br>light chain LC1 | MAP1B        | 1947 | T | 0.67  | 143.5 | 0.78 | NaN  | NaN  | NaN  | NaN  | NaN  | 1.19 | NaN  | 1.05 |
| P46937 | Transcriptional coactivator<br>YAP1                                            | YAP1         | 63   | T | 0.552 | 222.8 | NaN  | NaN  | 0.83 | NaN  | 1.06 | 0.91 | NaN  | NaN  | 0.66 |
| P48634 | Protein PRRC2A                                                                 | PRRC2A       | 610  | T | 0.828 | 71.65 | 1.65 | NaN  | 1.60 | 1.78 | 1.89 | 1.69 | 1.29 | 1.44 | 1.25 |
| P49006 | MARCKS-related protein                                                         | MARCKS<br>L1 | 148  | T | 0.999 | 101.4 | 0.98 | 0.83 | 0.83 | 0.82 | 1.01 | 0.73 | 0.80 | 0.69 | 0.63 |
| P49585 | Choline-phosphate<br>cytidyltransferase A                                      | PCYT1A       | 342  | T | 0.847 | 57.2  | NaN  | NaN  | NaN  | NaN  | NaN  | NaN  | 0.83 | NaN  | 0.58 |
| P51116 | Fragile X mental retardation<br>syndrome-related protein 2                     | FXR2         | 598  | T | 0.992 | 109.7 | 1.57 | 1.50 | NaN  | 0.95 | NaN  | NaN  | 1.55 | NaN  | NaN  |
| P52732 | Kinesin-like protein KIF11                                                     | KIF11        | 926  | T | 0.767 | 78.9  | 1.38 | 1.44 | 1.31 | NaN  | NaN  | 2.54 | 0.53 | NaN  | 0.62 |
| P55081 | Microfibrillar-associated<br>protein 1                                         | MFAP1        | 267  | T | 1     | 281.1 | 0.95 | 1.20 | 1.18 | 0.94 | 1.14 | 0.99 | 1.20 | 1.13 | 1.16 |
| P80723 | Brain acid soluble protein 1                                                   | BASP1        | 36   | T | 1     | 241.5 | NaN  | 1.17 | NaN  | 0.50 | 0.55 | NaN  | 0.54 | 0.43 | NaN  |
| P80723 | Brain acid soluble protein 1                                                   | BASP1        | 196  | T | 0.929 | 192.4 | 2.53 | NaN  | NaN  | 3.54 | 3.07 | NaN  | 2.48 | NaN  | NaN  |
| P85037 | Forkhead box protein K1                                                        | FOXK1        | 436  | T | 0.999 | 69.46 | 1.75 | 1.84 | NaN  | 1.56 | NaN  | NaN  | NaN  | NaN  | NaN  |
| P85037 | Forkhead box protein K1                                                        | FOXK1        | 245  | T | 0.687 | 83.25 | NaN  | NaN  | NaN  | 1.33 | 0.84 | NaN  | NaN  | NaN  | NaN  |
| Q01130 | Serine/arginine-rich splicing<br>factor 2                                      | SRSF2        | 22   | T | 0.774 | 89.98 | 0.94 | NaN  | NaN  | NaN  | NaN  | 1.15 | 0.64 | NaN  | 0.88 |
| Q03111 | Protein ENL                                                                    | MLLT1        | 314  | T | 0.836 | 85.62 | NaN  | NaN  | NaN  | 0.93 | NaN  | NaN  | 0.97 | NaN  | 0.87 |
| Q05209 | Tyrosine-protein phosphatase<br>non-receptor type 12                           | PTPN12       | 509  | T | 0.915 | 92.55 | NaN  | 0.79 | NaN  | NaN  | NaN  | NaN  | 1.05 | NaN  | 1.09 |
| Q09666 | Neuroblast differentiation-<br>associated protein AHNAK                        | AHNAK        | 5729 | T | 0.67  | 84.38 | NaN  | NaN  | NaN  | 1.00 | 1.11 | NaN  | 0.82 | 0.84 | NaN  |
| Q09666 | Neuroblast differentiation-<br>associated protein AHNAK                        | AHNAK        | 5839 | T | 0.738 | 108.7 | NaN  | 0.89 | 0.83 | 0.72 | 0.87 | NaN  | 0.81 | 1.13 | 1.01 |
| Q09666 | Neuroblast differentiation-<br>associated protein AHNAK                        | AHNAK        | 490  | T | 1     | 120.9 | 0.61 | 0.75 | 0.68 | 1.15 | 1.27 | 1.17 | 0.64 | 0.60 | 0.68 |
| Q12906 | Interleukin enhancer-binding<br>factor 3                                       | ILF3         | 486  | T | 0.545 | 73.39 | 0.52 | NaN  | 0.81 | NaN  | NaN  | 0.76 | 1.05 | 0.96 | 0.97 |
| Q12906 | Interleukin enhancer-binding<br>factor 3                                       | ILF3         | 592  | T | 1     | 133.2 | 2.88 | 2.63 | 2.52 | 4.67 | 5.09 | 4.21 | 0.76 | 0.75 | 0.76 |
| Q13177 | Serine/threonine-protein<br>kinase PAK 2;PAK-2p27;PAK-                         | PAK2         | 169  | T | 1     | 166.9 | 2.25 | 1.71 | 2.19 | 1.91 | 1.86 | 1.46 | 1.77 | 1.70 | NaN  |

|        |                                                               |          |      |   |       |       |      |      |      |      |      |      |      |      |      |
|--------|---------------------------------------------------------------|----------|------|---|-------|-------|------|------|------|------|------|------|------|------|------|
| Q13443 | Disintegrin and metalloproteinase domain-containing protein 9 | ADAM9    | 761  | T | 1     | 73.41 | 2.24 | NaN  | NaN  | NaN  | 2.76 | 2.66 | NaN  | NaN  | NaN  |
| Q13469 | Nuclear factor of activated T-cells, cytoplasmic 2            | NFATC2   | 325  | T | 0.678 | 113.2 | 1.44 | 0.98 | NaN  | NaN  | NaN  | NaN  | 1.67 | NaN  | 1.55 |
| Q13501 | Sequestosome-1                                                | SQSTM1   | 269  | T | 1     | 189.4 | 1.17 | 1.42 | 1.39 | 1.75 | 1.49 | 1.40 | 0.67 | 0.58 | 0.80 |
| Q13541 | Eukaryotic translation initiation factor 4E-binding protein 1 | EIF4EBP1 | 68   | T | 0.882 | 152.9 | 0.84 | 0.71 | NaN  | 2.03 | 2.61 | 2.44 | 1.84 | 1.44 | 1.88 |
| Q13541 | Eukaryotic translation initiation factor 4E-binding protein 1 | EIF4EBP1 | 70   | T | 0.757 | 98.69 | 2.91 | 2.68 | 2.72 | 2.12 | 2.38 | 2.33 | 0.72 | 0.83 | 2.30 |
| Q13541 | Eukaryotic translation initiation factor 4E-binding protein 1 | EIF4EBP1 | 37   | T | 0.883 | 106.9 | 2.50 | 2.34 | 2.68 | 2.04 | NaN  | 2.08 | 2.60 | NaN  | 2.26 |
| Q13541 | Eukaryotic translation initiation factor 4E-binding protein 1 | EIF4EBP1 | 46   | T | 0.951 | 106.9 | 2.40 | 1.93 | 2.68 | 2.01 | 1.91 | 2.10 | NaN  | NaN  | 2.26 |
| Q13542 | Eukaryotic translation initiation factor 4E-binding protein 2 | EIF4EBP2 | 36   | T | 0.736 | 79.87 | NaN  | 3.40 | NaN  | NaN  | NaN  | 2.17 | 3.25 | 2.70 | NaN  |
| Q13595 | Transformer-2 protein homolog alpha                           | TRA2A    | 88   | T | 0.997 | 68.37 | 1.08 | 0.50 | 0.39 | 0.53 | 0.83 | 0.94 | 1.32 | 1.24 | 1.25 |
| Q14247 | Src substrate cortactin                                       | CTTN     | 399  | T | 0.633 | 101.8 | 1.15 | 1.11 | 1.22 | 2.74 | 2.95 | 1.02 | 1.36 | 1.08 | 1.43 |
| Q14247 | Src substrate cortactin                                       | CTTN     | 401  | T | 1     | 252.6 | 1.11 | 0.97 | 0.95 | 1.14 | 1.22 | 0.99 | 1.31 | 1.41 | 1.32 |
| Q15648 | Mediator of RNA polymerase II transcription subunit 1         | MED1     | 1051 | T | 0.993 | 64.41 | 0.81 | 0.69 | 0.79 | 0.84 | 1.01 | 0.62 | 1.27 | 1.46 | 0.95 |
| Q15678 | Tyrosine-protein phosphatase non-receptor type 14             | PTPN14   | 309  | T | 0.509 | 48.22 | NaN  | NaN  | NaN  | NaN  | 0.86 | NaN  | NaN  | 1.47 | 1.30 |
| Q15910 | Histone-lysine N-methyltransferase EZH2                       | EZH2     | 487  | T | 1     | 175.8 | 0.54 | 0.54 | 0.67 | 1.02 | 0.70 | 0.69 | 0.96 | 0.82 | 0.87 |
| Q16513 | Serine/threonine-protein kinase N2                            | PKN2     | 958  | T | 1     | 106.5 | NaN  | NaN  | 0.88 | 0.89 | 1.24 | 1.26 | 0.91 | 1.00 | NaN  |
| Q1RLN5 | Rho GTPase-activating protein 12                              | ARHGAP12 | 230  | T | 0.603 | 117.9 | NaN  | NaN  | NaN  | 0.88 | 0.93 | 1.14 | NaN  | 0.83 | 0.87 |
| Q1RLN5 | Rho GTPase-activating protein 12                              | ARHGAP12 | 231  | T | 0.965 | 79.29 | 0.84 | 0.85 | 0.80 | NaN  | 0.93 | 1.46 | 0.86 | 0.83 | NaN  |
| Q27J81 | Inverted formin-2                                             | INF2     | 1148 | T | 0.663 | 88.74 | 1.27 | 1.13 | NaN  | 0.66 | NaN  | NaN  | NaN  | 1.19 | NaN  |
| Q2M2I8 | AP2-associated protein kinase 1                               | AAK1     | 620  | T | 1     | 131.1 | 0.51 | 0.42 | 1.41 | 0.60 | 0.56 | 1.34 | 0.56 | 0.57 | 0.55 |
| Q2M2I8 | AP2-associated protein kinase 1                               | AAK1     | 606  | T | 0.966 | 98.37 | 0.61 | 0.60 | NaN  | 0.94 | NaN  | 0.94 | NaN  | NaN  | 0.88 |
| Q32MZ4 | Leucine-rich repeat flightless-interacting protein 1          | LRRFIP1  | 123  | T | 0.869 | 114.5 | NaN  | 1.14 | 1.26 | NaN  | NaN  | NaN  | NaN  | NaN  | NaN  |
| Q3KQU3 | MAP7 domain-containing protein 1                              | MAP7D1   | 97   | T | 0.6   | 46.96 | 1.03 | 0.98 | 0.87 | 0.95 | 1.03 | 1.23 | 0.90 | NaN  | NaN  |
| Q4G0J3 | La-related protein 7                                          | LARP7    | 338  | T | 1     | 115.3 | 1.07 | 1.03 | 0.93 | NaN  | 1.20 | 0.91 | 1.31 | 1.14 | 0.97 |
| Q4KMP7 | TBC1 domain family member 10B                                 | TBC1D10B | 148  | T | 0.995 | 99.87 | 1.50 | 1.87 | NaN  | NaN  | NaN  | NaN  | 4.15 | NaN  | NaN  |
| Q4VCS5 | Angiotensin                                                   | AMOT     | 12   | T | 0.691 | 61.17 | 0.83 | NaN  | 0.87 | 0.70 | 0.78 | 0.74 | 0.90 | 0.94 | NaN  |
| Q5VZS7 | Programmed cell death protein 4                               | PDCD4    | 79   | T | 0.873 | 155.2 | 0.76 | 0.75 | NaN  | 0.84 | NaN  | NaN  | 1.04 | NaN  | NaN  |

|        |                                                                       |          |     |   |       |       |      |      |      |      |      |      |      |      |      |
|--------|-----------------------------------------------------------------------|----------|-----|---|-------|-------|------|------|------|------|------|------|------|------|------|
| Q53TN4 | Cytochrome b reductase 1                                              | CYBRD1   | 285 | T | 0.737 | 172.6 | NaN  | 0.40 | NaN  | 0.70 | NaN  | 0.76 | NaN  | NaN  | NaN  |
| Q58WW2 | DDB1- and CUL4-associated factor 6                                    | DCAF6    | 654 | T | 0.999 | 76.2  | 0.61 | 0.62 | 0.62 | NaN  | NaN  | NaN  | NaN  | 0.98 | NaN  |
| Q5JTD0 | Tight junction-associated protein 1                                   | TJAP1    | 422 | T | 1     | 82.59 | 2.30 | 2.05 | NaN  | 2.30 | 2.66 | 2.68 | 1.12 | 1.25 | NaN  |
| Q5STZ8 | ATP-binding cassette sub-family F member 1                            | ABCF1    | 109 | T | 1     | 123.2 | 1.17 | 0.45 | 2.28 | 1.61 | 1.56 | 1.51 | 1.76 | 0.55 | 0.54 |
| Q5T200 | Zinc finger CCCH domain-containing protein 13                         | ZC3H13   | 263 | T | 1     | 78.99 | 0.82 | 0.84 | 0.91 | 0.82 | 0.88 | 1.04 | 0.81 | 0.98 | 0.75 |
| Q5T2Z0 | Proline/serine-rich coiled-coil protein 1                             | PSRC1    | 177 | T | 0.812 | 56.71 | NaN  | NaN  | 0.71 | 0.67 | NaN  | 0.74 | 0.90 | 1.05 | 0.96 |
| Q5VT52 | Regulation of nuclear pre-mRNA domain-containing protein 2            | RPRD2    | 723 | T | 0.997 | 57.21 | 1.19 | 1.27 | NaN  | NaN  | NaN  | NaN  | NaN  | NaN  | 2.13 |
| Q5VT52 | Regulation of nuclear pre-mRNA domain-containing protein 2            | RPRD2    | 732 | T | 0.993 | 117.3 | 0.43 | 0.51 | 0.62 | 0.80 | NaN  | 0.82 | NaN  | 0.33 | NaN  |
| Q63ZY6 | Putative methyltransferase NSUN5C                                     | NSUN5P2  | 258 | T | 0.986 | 42.63 | NaN  | NaN  | 0.59 | NaN  | 1.12 | 0.72 | NaN  | NaN  | 0.60 |
| Q66K74 | Microtubule-associated protein 1S;MAP1S heavy chain;MAP1S light chain | MAP1S    | 638 | T | 1     | 176   | 0.94 | 0.99 | 0.91 | 0.99 | 0.93 | 0.87 | 1.01 | 1.04 | 1.08 |
| Q61Q49 | Protein SDE2 homolog                                                  | SDE2     | 274 | T | 0.545 | 78.98 | NaN  | 1.08 | NaN  | 1.15 | NaN  | NaN  | 0.97 | NaN  | 1.41 |
| Q6NZ12 | Polymerase I and transcript release factor                            | PTRF     | 376 | T | 0.85  | 131.5 | 0.57 | 0.48 | NaN  | NaN  | NaN  | NaN  | NaN  | NaN  | NaN  |
| Q6PD62 | RNA polymerase-associated protein CTR9 homolog                        | CTR9     | 925 | T | 1     | 135.8 | 0.80 | 0.90 | 0.79 | 0.86 | 0.69 | 0.89 | 0.96 | 0.88 | 0.98 |
| Q6PKG0 | La-related protein 1                                                  | LARP1    | 526 | T | 1     | 59.43 | 2.69 | 2.45 | 1.97 | NaN  | 1.97 | 1.54 | 2.06 | 2.20 | NaN  |
| Q6QNY0 | Biogenesis of lysosome-related organelles complex 1                   | BLOC1S3  | 63  | T | 1     | 128.9 | 1.15 | 1.16 | 1.25 | 1.09 | 1.11 | 0.39 | 1.09 | 0.45 | 1.16 |
| Q6UN15 | Pre-mRNA 3'-end-processing factor FIP1                                | FIP1L1   | 494 | T | 0.565 | 79.34 | NaN  | NaN  | NaN  | NaN  | NaN  | NaN  | 1.20 | 1.02 | NaN  |
| Q6ZTN6 | Ankyrin repeat domain-containing protein 13D                          | ANKRD13D | 469 | T | 1     | 66.08 | 0.81 | 0.71 | NaN  | 1.00 | 1.13 | 0.81 | 0.94 | 1.20 | 0.91 |
| Q7L4S7 | Protein ARM CX6                                                       | ARM CX6  | 166 | T | 0.587 | 53.33 | 1.32 | 1.22 | NaN  | NaN  | NaN  | NaN  | NaN  | NaN  | NaN  |
| Q7Z417 | Nuclear fragile X mental retardation-interacting protein              | NUFIP2   | 571 | T | 0.889 | 93.84 | 1.86 | 1.55 | NaN  | 1.80 | 1.64 | NaN  | 1.43 | 0.86 | NaN  |
| Q86TB9 | Protein PAT1 homolog 1                                                | PATL1    | 194 | T | 1     | 99.34 | 1.15 | 1.43 | 1.64 | 1.41 | 1.59 | 1.65 | 1.60 | 1.36 | 1.58 |
| Q86UP2 | Kinectin                                                              | KTN1     | 153 | T | 1     | 62.04 | 0.91 | NaN  | NaN  | 1.20 | NaN  | 1.07 | 1.07 | 1.08 | NaN  |
| Q86UU1 | Pleckstrin homology-like domain family B member 1                     | PHLDB1   | 417 | T | 0.732 | 59.15 | 5.48 | 5.63 | 6.05 | NaN  | 1.96 | 2.08 | 6.17 | NaN  | 4.83 |
| Q8N3D4 | EH domain-binding protein 1-like protein 1                            | EHBP1L1  | 284 | T | 0.616 | 180   | 1.00 | NaN  | 0.98 | 1.15 | 1.13 | 1.03 | 0.96 | 0.83 | 0.82 |
| Q8NC44 | Protein FAM134A                                                       | FAM134A  | 279 | T | 0.997 | 118.3 | NaN  | 0.99 | 0.95 | NaN  | 2.01 | 1.01 | 1.32 | 1.34 | 1.65 |
| Q8NC56 | LEM domain-containing protein 2                                       | LEMD2    | 147 | T | 1     | 131.1 | 0.77 | 0.78 | 0.94 | 0.88 | 1.04 | 0.98 | NaN  | NaN  | NaN  |
| Q8ND56 | Protein LSM14 homolog A                                               | LSM14A   | 194 | T | 0.805 | 116.8 | NaN  | 1.35 | NaN  | NaN  | NaN  | NaN  | 0.89 | NaN  | 1.25 |

|        |                                                                   |         |      |   |       |       |      |      |      |      |      |      |      |      |      |
|--------|-------------------------------------------------------------------|---------|------|---|-------|-------|------|------|------|------|------|------|------|------|------|
| Q8NI08 | Nuclear receptor coactivator 7                                    | NCOA7   | 210  | T | 0.673 | 116.6 | 0.88 | NaN  | NaN  | 1.06 | NaN  | 0.87 | 0.94 | NaN  | NaN  |
| Q8WVC0 | RNA polymerase-associated protein LEO1                            | LEO1    | 629  | T | 0.681 | 77.07 | 0.83 | 0.86 | 0.90 | NaN  | 0.62 | 0.58 | NaN  | NaN  | 0.66 |
| Q8WVC0 | RNA polymerase-associated protein LEO1                            | LEO1    | 188  | T | 1     | 56.47 | 0.68 | 0.46 | NaN  | NaN  | NaN  | NaN  | 0.66 | NaN  | NaN  |
| Q8WXX0 | Dynein heavy chain 7, axonemal                                    | DNAH7   | 2197 | T | 0.989 | 72.88 | NaN  | NaN  | NaN  | 0.94 | 0.76 | NaN  | NaN  | NaN  | NaN  |
| Q8WXX0 | Dynein heavy chain 7, axonemal                                    | DNAH7   | 2198 | T | 0.989 | 72.88 | NaN  | NaN  | NaN  | 0.94 | 0.76 | NaN  | NaN  | NaN  | NaN  |
| Q92688 | Acidic leucine-rich nuclear phosphoprotein 32 family member B     | ANP32B  | 244  | T | 1     | 251.9 | 0.93 | 0.96 | 0.96 | 0.96 | 0.97 | 0.80 | 0.94 | 0.95 | 0.96 |
| Q92692 | Nectin-2                                                          | PVRL2   | 410  | T | 0.997 | 137.5 | 0.93 | 1.14 | 1.31 | 1.32 | 1.28 | 0.89 | 1.15 | 1.43 | 1.83 |
| Q92797 | Symplekin                                                         | SYMPK   | 1257 | T | 1     | 120.7 | 0.67 | 0.85 | 0.62 | 1.11 | NaN  | 1.07 | 0.78 | 0.67 | 0.84 |
| Q92995 | Ubiquitin carboxyl-terminal hydrolase 13                          | USP13   | 122  | T | 1     | 105.5 | 0.66 | 0.68 | NaN  | NaN  | NaN  | NaN  | 0.42 | NaN  | NaN  |
| Q96A49 | Synapse-associated protein 1                                      | SYAP1   | 248  | T | 1     | 190.8 | NaN  | NaN  | 1.03 | 0.91 | 0.88 | 0.94 | 1.32 | 1.32 | 1.16 |
| Q96N67 | Dedicator of cytokinesis protein 7                                | DOCK7   | 909  | T | 0.964 | 325.4 | NaN  | 0.84 | 1.09 | 0.91 | NaN  | 0.78 | 0.86 | NaN  | NaN  |
| Q96PK6 | RNA-binding protein 14                                            | RBM14   | 206  | T | 1     | 117.5 | 1.31 | 1.23 | 1.28 | 1.09 | 1.13 | 1.09 | 1.32 | 1.24 | 1.27 |
| Q96PX8 | SLIT and NTRK-like protein 1                                      | SLITRK1 | 590  | T | 0.918 | 79.04 | NaN  | NaN  | 1.05 | 0.91 | 0.70 | NaN  | 1.17 | 1.14 | NaN  |
| Q96T23 | Remodeling and spacing factor 1                                   | RSF1    | 628  | T | 0.599 | 116.9 | NaN  | 0.62 | 0.69 | NaN  | 0.95 | 0.93 | 0.98 | 1.11 | NaN  |
| Q99442 | Translocation protein SEC62                                       | SEC62   | 158  | T | 0.972 | 74.53 | 1.39 | 1.37 | NaN  | NaN  | NaN  | 0.86 | 1.25 | NaN  | NaN  |
| Q9BQA1 | Methylosome protein 50                                            | WDR77   | 5    | T | 1     | 48.11 | 1.17 | 1.28 | 1.19 | 1.30 | 1.18 | 1.37 | 1.10 | 1.00 | 1.13 |
| Q9BRD0 | BUD13 homolog                                                     | BUD13   | 159  | T | 1     | 58.78 | 1.42 | 1.92 | NaN  | NaN  | NaN  | NaN  | 2.23 | 2.11 | NaN  |
| Q9BRD0 | BUD13 homolog                                                     | BUD13   | 135  | T | 1     | 71.56 | 1.47 | NaN  | 1.90 | NaN  | NaN  | NaN  | 1.76 | NaN  | NaN  |
| Q9BRQ0 | Pygopus homolog 2                                                 | PYGO2   | 302  | T | 1     | 167.3 | 1.06 | 0.91 | 1.00 | NaN  | NaN  | 0.94 | 1.01 | 1.05 | 0.97 |
| Q9BRS8 | La-related protein 6                                              | LARP6   | 450  | T | 0.533 | 57.15 | NaN  | NaN  | NaN  | NaN  | NaN  | NaN  | 1.48 | 1.76 | 1.74 |
| Q9BTC0 | Death-inducer obliterator 1                                       | DIDO1   | 1255 | T | 0.841 | 41.59 | NaN  | NaN  | NaN  | 1.10 | 1.24 | NaN  | 0.95 | NaN  | NaN  |
| Q9BTC0 | Death-inducer obliterator 1                                       | DIDO1   | 1256 | T | 0.841 | 60.66 | NaN  | NaN  | NaN  | 1.10 | 1.24 | NaN  | 0.95 | NaN  | NaN  |
| Q9BU76 | Multiple myeloma tumor-associated protein 2                       | MMTAG2  | 215  | T | 0.956 | 90.87 | 0.59 | 0.73 | NaN  | NaN  | 1.35 | NaN  | 1.61 | NaN  | NaN  |
| Q9BU76 | Multiple myeloma tumor-associated protein 2                       | MMTAG2  | 219  | T | 0.95  | 90.87 | 0.59 | 0.73 | NaN  | 0.74 | 0.60 | NaN  | NaN  | 0.76 | NaN  |
| Q9BXP5 | Serrate RNA effector molecule homolog                             | SRRT    | 544  | T | 1     | 144.4 | 0.91 | 0.97 | 1.02 | 1.12 | 1.12 | 1.08 | 1.15 | 1.24 | 1.06 |
| Q9C0B5 | Palmitoyltransferase ZDHHC5                                       | ZDHHC5  | 524  | T | 0.568 | 60.76 | NaN  | 1.56 | 1.68 | NaN  | NaN  | 1.25 | NaN  | NaN  | NaN  |
| Q9H1E3 | Nuclear ubiquitous casein and cyclin-dependent kinase substrate 1 | NUCKS1  | 179  | T | 1     | 155.5 | 1.79 | 1.89 | 2.00 | 3.16 | 2.83 | 3.27 | 1.05 | 1.04 | 1.08 |
| Q9H1E3 | Nuclear ubiquitous casein and cyclin-dependent kinase substrate 1 | NUCKS1  | 202  | T | 1     | 144.7 | 0.78 | 1.23 | 1.27 | 1.07 | 0.89 | 1.17 | 0.96 | 1.03 | 1.37 |
| Q9H6F5 | Coiled-coil domain-containing protein 86                          | CCDC86  | 65   | T | 0.874 | 64.04 | 0.74 | 0.65 | 0.62 | 0.77 | 0.74 | 0.83 | NaN  | NaN  | 0.55 |



|        |                                                                             |         |      |   |       |       |      |      |      |      |      |       |      |      |      |
|--------|-----------------------------------------------------------------------------|---------|------|---|-------|-------|------|------|------|------|------|-------|------|------|------|
| Q9H6F5 | Coiled-coil domain-containing protein 86                                    | CCDC86  | 42   | T | 0.998 | 122   | 1.12 | NaN  | NaN  | 1.21 | NaN  | NaN   | 1.00 | 1.01 | NaN  |
| Q9H7N4 | Splicing factor, arginine/serine-rich 19                                    | SCAF1   | 989  | T | 1     | 177   | 0.77 | 0.86 | 0.78 | 1.30 | 1.03 | 0.83  | 0.64 | 0.66 | 1.26 |
| Q9H7N4 | Splicing factor, arginine/serine-rich 19                                    | SCAF1   | 1001 | T | 0.865 | 116.5 | NaN  | NaN  | NaN  | 1.03 | NaN  | 0.99  | NaN  | NaN  | NaN  |
| Q9H7N4 | Splicing factor, arginine/serine-rich 19                                    | SCAF1   | 976  | T | 0.981 | 72.37 | 1.02 | 0.94 | 0.89 | NaN  | 0.97 | 1.00  | 1.01 | 0.98 | NaN  |
| Q9HA65 | TBC1 domain family member                                                   | TBC1D17 | 606  | T | 0.802 | 97.04 | NaN  | NaN  | 2.02 | NaN  | NaN  | NaN   | 0.65 | 1.74 | NaN  |
| Q9NQS7 | Inner centromere protein                                                    | INCENP  | 219  | T | 0.787 | 150.5 | 1.18 | NaN  | NaN  | 2.16 | NaN  | 1.83  | NaN  | NaN  | NaN  |
| Q9NVD7 | Alpha-parvin                                                                | PARVA   | 16   | T | 0.941 | 129.5 | NaN  | 1.32 | 0.61 | NaN  | 1.13 | 0.46  | 0.90 | 0.89 | 1.08 |
| Q9NWZ5 | Uridine-cytidine kinase-like 1                                              | UCKL1   | 53   | T | 0.86  | 125.4 | 1.26 | 1.23 | NaN  | NaN  | NaN  | 1.88  | 0.91 | NaN  | 0.83 |
| Q9P2Q2 | FERM domain-containing protein 4A<br>Leucyl-cystinyl                        | FRMD4A  | 696  | T | 0.5   | 79.07 | NaN  | NaN  | NaN  | NaN  | 0.74 | 1.52  | NaN  | 0.86 | NaN  |
| Q9UIQ6 | aminopeptidase;Leucyl-cystinyl aminopeptidase,                              | LNPEP   | 326  | T | 0.644 | 45.92 | 0.64 | NaN  | 0.65 | 0.66 | 0.80 | 0.68  | NaN  | 0.60 | 0.91 |
| Q9UK61 | pregnancy serum form Protein FAM208A<br>Hematological and                   | FAM208A | 921  | T | 0.598 | 53.78 | 0.50 | 0.50 | NaN  | NaN  | NaN  | NaN   | NaN  | NaN  | 0.95 |
| Q9UK76 | neurological expressed 1 protein;Hematological and neurological expressed 1 | HN1     | 54   | T | 1     | 183.8 | 5.27 | 5.14 | 4.83 | 9.89 | 8.91 | 10.25 | NaN  | 2.08 | NaN  |
| Q9UKJ3 | protein N-terminally G patch domain-containing protein 8                    | GPATCH8 | 655  | T | 0.626 | 69.74 | NaN  | NaN  | NaN  | 1.50 | NaN  | 1.27  | NaN  | NaN  | 0.94 |
| Q9UKK3 | Poly [ADP-ribose] polymerase                                                | PARP4   | 1493 | T | 0.5   | 129   | 0.83 | 0.65 | 0.75 | 0.74 | 0.70 | 0.86  | 1.01 | 1.03 | 0.99 |
| Q9UKK3 | Poly [ADP-ribose] polymerase                                                | PARP4   | 1494 | T | 0.5   | 129   | 0.83 | 0.65 | 0.75 | 0.74 | 0.70 | 0.86  | 1.01 | 1.03 | 0.99 |
| Q9UQ35 | Serine/arginine repetitive matrix protein 2                                 | SRRM2   | 1492 | T | 1     | 73.63 | NaN  | 1.25 | NaN  | NaN  | NaN  | NaN   | 1.81 | NaN  | 2.06 |
| Q9UQ35 | Serine/arginine repetitive matrix protein 2                                 | SRRM2   | 1003 | T | 1     | 181   | 0.55 | 0.60 | 0.50 | 1.37 | 0.71 | 0.74  | 0.83 | 0.67 | 0.85 |
| Q9UQ35 | Serine/arginine repetitive matrix protein 2                                 | SRRM2   | 1434 | T | 1     | 72.53 | 1.75 | 1.78 | 1.78 | 1.46 | 1.59 | 1.57  | 1.77 | 1.65 | 1.61 |
| Q9UQ35 | Serine/arginine repetitive matrix protein 2                                 | SRRM2   | 1208 | T | 1     | 110.4 | 1.05 | 1.14 | 1.14 | 1.06 | 1.18 | 1.10  | 1.13 | 1.10 | 1.14 |
| Q9UQ35 | Serine/arginine repetitive matrix protein 2                                 | SRRM2   | 1231 | T | 0.708 | 77.85 | NaN  | 1.05 | 0.97 | NaN  | NaN  | NaN   | NaN  | NaN  | NaN  |
| Q9UQ35 | Serine/arginine repetitive matrix protein 2                                 | SRRM2   | 2738 | T | 1     | 51.03 | 1.11 | 1.09 | NaN  | NaN  | NaN  | NaN   | NaN  | NaN  | NaN  |
| Q9UQ35 | Serine/arginine repetitive matrix protein 2                                 | SRRM2   | 383  | T | 0.778 | 96.79 | NaN  | 1.75 | 1.53 | 1.33 | NaN  | NaN   | NaN  | NaN  | NaN  |
| Q9UQ35 | Serine/arginine repetitive matrix protein 2                                 | SRRM2   | 1177 | T | 0.726 | 79.02 | 0.59 | 0.62 | 0.72 | 0.80 | NaN  | NaN   | NaN  | NaN  | 0.83 |
| Q9UQ35 | Serine/arginine repetitive matrix protein 2                                 | SRRM2   | 2104 | T | 1     | 98    | 1.00 | 1.00 | 1.21 | 1.01 | 0.93 | 1.07  | 1.12 | 1.18 | NaN  |

|            |                                                                               |          |           |   |       |       |      |      |      |      |      |      |      |      |      |
|------------|-------------------------------------------------------------------------------|----------|-----------|---|-------|-------|------|------|------|------|------|------|------|------|------|
| Q9UQ35     | Serine/arginine repetitive matrix protein 2                                   | SRRM2    | 856       | T | 0.812 | 115.8 | 1.35 | 1.81 | 0.68 | NaN  | NaN  | NaN  | 2.11 | 0.74 | 2.32 |
| Q9UQ35     | Serine/arginine repetitive matrix protein 2                                   | SRRM2    | 866       | T | 0.989 | 119.2 | 2.66 | 1.81 | 1.85 | 2.15 | 1.58 | 1.60 | 2.45 | 2.85 | 2.34 |
| Q9UQ35     | Serine/arginine repetitive matrix protein 2                                   | SRRM2    | 2583      | T | 0.978 | 66.5  | 0.94 | NaN  | 1.06 | 0.98 | NaN  | 0.97 | 1.06 | NaN  | 1.11 |
| Q9UQ35     | Serine/arginine repetitive matrix protein 2                                   | SRRM2    | 2092      | T | 0.985 | 56.01 | NaN  | NaN  | 0.44 | 0.58 | NaN  | 0.63 | NaN  | NaN  | 0.44 |
| Q9UQ35     | Serine/arginine repetitive matrix protein 2                                   | SRRM2    | 848       | T | 0.917 | 115.8 | 0.89 | 0.83 | 0.83 | 0.84 | 0.82 | 1.60 | 0.73 | 0.74 | 0.72 |
| Q9UQ35     | Serine/arginine repetitive matrix protein 2                                   | SRRM2    | 2069      | T | 1     | 68.46 | 2.36 | 2.46 | 2.63 | 2.00 | 1.96 | NaN  | 0.28 | 2.61 | NaN  |
| Q9UQ35     | Serine/arginine repetitive matrix protein 2                                   | SRRM2    | 2022      | T | 1     | 76.85 | 1.36 | 1.42 | 1.34 | 1.17 | 1.22 | 1.20 | 1.42 | 1.43 | 1.48 |
| Q9UQ35     | Serine/arginine repetitive matrix protein 2                                   | SRRM2    | 2409      | T | 1     | 106.3 | 0.91 | 1.07 | 0.88 | 0.91 | 0.98 | 0.81 | 1.08 | 0.97 | 0.89 |
| Q9UQ35     | Serine/arginine repetitive matrix protein 2                                   | SRRM2    | 1927      | T | 1     | 72.58 | 1.37 | 1.38 | 1.27 | 1.19 | NaN  | 1.20 | 1.45 | 1.42 | 1.52 |
| Q9UQ35     | Serine/arginine repetitive matrix protein 2                                   | SRRM2    | 1043      | T | 0.987 | 157.4 | 0.88 | 0.80 | 0.76 | 0.97 | 0.81 | 0.75 | 0.99 | 0.93 | 0.93 |
| Q9UQ35     | Serine/arginine repetitive matrix protein 2                                   | SRRM2    | 903       | T | 0.903 | 93.39 | 0.97 | 0.91 | 1.07 | NaN  | 0.85 | 0.84 | 1.06 | NaN  | NaN  |
| Q9UQ35     | Serine/arginine repetitive matrix protein 2                                   | SRRM2    | 1527      | T | 0.862 | 62.34 | 2.57 | NaN  | 1.78 | 1.47 | 1.57 | NaN  | 2.41 | NaN  | NaN  |
| Q9UQ35     | Serine/arginine repetitive matrix protein 2                                   | SRRM2    | 983       | T | 1     | 173.4 | 0.82 | 0.80 | 0.86 | 0.81 | 0.85 | 0.88 | 0.87 | 1.05 | 0.81 |
| Q9Y3P9     | Rab GTPase-activating protein 1                                               | RABGAP1  | 996       | T | 1     | 163.9 | 1.03 | 0.84 | 0.66 | 0.77 | 0.81 | 0.54 | 0.66 | 0.89 | 0.67 |
| Q9Y4B5     | Microtubule cross-linking factor 1                                            | MTCL1    | 1417      | T | 1     | 80.53 | 0.84 | 0.90 | NaN  | 0.99 | 0.97 | NaN  | NaN  | 0.89 | NaN  |
| Q9Y4D8     | Probable E3 ubiquitin-protein ligase HECTD4                                   | HECTD4   | 2080      | T | 0.999 | 69.03 | 0.69 | 0.76 | 0.70 | 0.86 | NaN  | 0.88 | 1.02 | 0.80 | 0.93 |
| Q9Y4H2     | Insulin receptor substrate 2                                                  | IRS2     | 1202      | T | 0.832 | 183.2 | 2.45 | NaN  | 2.40 | 1.37 | NaN  | 1.41 | 2.38 | 1.73 | 1.79 |
| Q9Y4H2     | Insulin receptor substrate 2                                                  | IRS2     | 779       | T | 0.946 | 56.9  | NaN  | NaN  | NaN  | 1.45 | NaN  | 1.29 | NaN  | NaN  | NaN  |
| G3V317     | Cyclin-dependent kinase 1;Cyclin-dependent kinase 2;Cyclin-dependent kinase 3 | CDK2     | 15        | Y | 1     | 100.8 | NaN  | 0.91 | NaN  | NaN  | 1.47 | 1.50 | NaN  | 0.69 | 0.71 |
| A0A087WY22 | Protein-tyrosine-phosphatase;Receptor-type tyrosine-protein phosphatase       | PTPRT    | 1045      | Y | 1     | 63.73 | NaN  | 0.80 | NaN  | 0.78 | 0.74 | NaN  | NaN  | NaN  | 0.91 |
| A0A087WTN1 | Uncharacterized protein C9orf173                                              | C9orf173 | 76        | Y | 0.864 | 46.92 | NaN  | NaN  | NaN  | NaN  | 0.78 | 0.77 | NaN  | NaN  | 0.82 |
| A0A087WWY2 |                                                                               | FOLR2    | 144       | Y | 0.991 | 48.11 | 0.80 | 0.67 | NaN  | NaN  | 0.73 | NaN  | 0.81 | 0.98 | NaN  |
| A0A087X0K9 | Tight junction protein ZO-1                                                   | TJP1     | 120;132   | Y | 0.703 | 77.04 | NaN  | NaN  | NaN  | 1.80 | 1.42 | NaN  | 1.52 | NaN  | NaN  |
| A0A087X0K9 | Tight junction protein ZO-1                                                   | TJP1     | 1440;153; | Y | 0.527 | 42.81 | 0.32 | 0.57 | NaN  | NaN  | NaN  | NaN  | NaN  | NaN  | NaN  |
| A0A096LP07 |                                                                               | GPS1     | 207       | Y | 0.722 | 47.13 | NaN  | NaN  | 1.60 | 1.42 | 1.41 | 1.36 | 1.54 | 1.52 | NaN  |
| A0A096LP07 |                                                                               | GPS1     | 217       | Y | 0.743 | 47.13 | NaN  | NaN  | 1.60 | 1.42 | 1.41 | 1.36 | 1.54 | 1.52 | NaN  |

|            |                                                                                                                                                                        |          |       |   |       |       |      |      |      |      |      |      |      |      |      |
|------------|------------------------------------------------------------------------------------------------------------------------------------------------------------------------|----------|-------|---|-------|-------|------|------|------|------|------|------|------|------|------|
| A0A0A0MRA3 | Titin                                                                                                                                                                  | TTN      | 25698 | Y | 1     | 59.26 | NaN  | NaN  | 0.78 | 0.69 | 0.61 | 0.71 | 1.11 | 1.02 | 0.95 |
| A0A0A0MRZ4 | TNFAIP3-interacting protein 1                                                                                                                                          | TNIP1    | 7     | Y | 0.506 | 50.23 | 2.02 | 1.69 | NaN  | 2.72 | 3.58 | NaN  | NaN  | 0.76 | NaN  |
| A0A0A0MRZ4 | TNFAIP3-interacting protein 1                                                                                                                                          | TNIP1    | 10    | Y | 0.506 | 50.23 | 2.02 | 1.69 | NaN  | 2.72 | 3.58 | NaN  | NaN  | 0.76 | NaN  |
| A0A0D9SEV1 |                                                                                                                                                                        | KCNQ2    | 566   | Y | 1     | 43.99 | NaN  | NaN  | 1.49 | 1.34 | 1.29 | 1.02 | 1.07 | 1.20 | 1.14 |
| F5GZ78     | Paxillin                                                                                                                                                               | PXN      | 116   | Y | 0.923 | 81.8  | 2.09 | 2.28 | NaN  | 1.61 | 1.67 | 1.38 | 0.91 | NaN  | NaN  |
| A0A2R8Y6M1 | ATP-binding cassette sub-family G member 8                                                                                                                             | ABCG8    | 325   | Y | 0.998 | 45.72 | NaN  | NaN  | 1.05 | NaN  | 0.83 | 0.83 | NaN  | 1.24 | 1.04 |
| A0A2R8YEM9 | TPR and ankyrin repeat-containing protein 1                                                                                                                            | TRANK1   | 1677  | Y | 0.999 | 40.29 | NaN  | NaN  | NaN  | 1.12 | 0.95 | NaN  | NaN  | NaN  | NaN  |
| A8MT37     | Glycogen synthase kinase-3 beta;Glycogen synthase kinase-3 alpha                                                                                                       | GSK3A    | 197   | Y | 0.987 | 163.5 | NaN  | NaN  | 0.76 | NaN  | 0.71 | 0.78 | 1.16 | 1.16 | 1.26 |
| A0A3B3IUFB | Rho guanine nucleotide exchange factor 15                                                                                                                              | ARHGEF15 | 253   | Y | 0.657 | 47.22 | 1.43 | 1.63 | NaN  | NaN  | 1.41 | NaN  | 0.89 | 1.57 | NaN  |
| A6NCQ9     | RING finger protein 222                                                                                                                                                | RNF222   | 66    | Y | 0.784 | 47.54 | NaN  | NaN  | 1.44 | 1.27 | 0.73 | NaN  | 0.72 | 0.91 | NaN  |
| P07355     | Annexin A2;Putative annexin A2-like protein;Annexin A2-like protein;Annexin                                                                                            | ANXA2    | 24    | Y | 0.896 | 242.1 | 0.60 | 0.68 | 0.77 | 0.82 | NaN  | 0.94 | 0.75 | 0.76 | NaN  |
| E7EX54     | Mitogen-activated protein kinase 14                                                                                                                                    | MAPK14   | 105   | Y | 0.71  | 101.6 | NaN  | NaN  | NaN  | NaN  | NaN  | NaN  | 1.00 | NaN  | 0.88 |
| D6R9P1     | Ectonucleotide pyrophosphatase/phosphodiesterase family member 6                                                                                                       | ENPP6    | 131   | Y | 0.976 | 46.88 | NaN  | NaN  | NaN  | 0.75 | 0.89 | NaN  | NaN  | NaN  | NaN  |
| H0YDD4     | Acetyltransferase component of pyruvate dehydrogenase complex;Dihydrolipoyllysine-residue acetyltransferase component of pyruvate dehydrogenase complex, mitochondrial | DLAT     | 278   | Y | 0.599 | 40.09 | NaN  | NaN  | NaN  | 0.95 | 1.17 | NaN  | NaN  | NaN  | NaN  |
| H0YE41     | Tyrosine-protein kinase;Non-receptor tyrosine-protein kinase TYK2                                                                                                      | TYK2     | 71    | Y | 1     | 93.26 | NaN  | NaN  | NaN  | NaN  | NaN  | NaN  | 1.41 | 1.27 | 1.59 |
| F5GZJ9     |                                                                                                                                                                        | PPP1R32  | 26    | Y | 1     | 41.62 | 0.46 | 0.56 | NaN  | NaN  | NaN  | NaN  | 0.86 | 0.74 | NaN  |
| F5H7D6     | Transducin-like enhancer protein 3                                                                                                                                     | TLE3     | 182   | Y | 0.949 | 95.34 | NaN  | NaN  | NaN  | 0.44 | 0.39 | NaN  | NaN  | NaN  | 1.14 |
| F5H7P5     | Palmitoyltransferase;Probable palmitoyltransferase ZDHHC11B                                                                                                            | ZDHHC11B | 282   | Y | 0.911 | 54.74 | NaN  | NaN  | NaN  | 1.37 | NaN  | NaN  | 1.50 | 1.48 | 1.45 |
| F6VUX8     | Centromere protein J                                                                                                                                                   | CENPJ    | 980   | Y | 1     | 44.83 | 0.70 | 0.95 | 1.14 | 1.00 | 0.55 | NaN  | 1.28 | 0.81 | NaN  |
| F8VXW2     |                                                                                                                                                                        | ARPC1B   | 124   | Y | 0.998 | 41.05 | 1.25 | 1.39 | NaN  | 1.11 | NaN  | 0.84 | 1.29 | 1.68 | NaN  |
| F8W6Z3     |                                                                                                                                                                        | ODF3     | 51    | Y | 0.991 | 41.08 | NaN  | NaN  | NaN  | NaN  | NaN  | NaN  | 2.31 | 1.26 | NaN  |
| H0YGI1     | Uncharacterized protein C12orf56                                                                                                                                       | C12orf56 | 39    | Y | 0.999 | 40.29 | NaN  | NaN  | NaN  | NaN  | NaN  | NaN  | 0.50 | 0.81 | NaN  |
| H7C1A6     |                                                                                                                                                                        | ADCY3    | 10    | Y | 0.951 | 40.55 | 1.07 | NaN  | NaN  | 1.02 | 1.10 | NaN  | 1.29 | NaN  | NaN  |
| H7C1A6     |                                                                                                                                                                        | ADCY3    | 11    | Y | 0.999 | 40.55 | 1.07 | NaN  | NaN  | 1.02 | 1.10 | NaN  | 1.29 | NaN  | NaN  |
| J3KSR8     | Serine/arginine-rich splicing factor 1                                                                                                                                 | SRSF1    | 97    | Y | 0.924 | 54.95 | NaN  | NaN  | 1.27 | 1.48 | 1.34 | 1.27 | 1.45 | 1.29 | NaN  |

|        |                                                                                     |               |      |   |       |       |      |      |      |      |      |      |      |      |      |
|--------|-------------------------------------------------------------------------------------|---------------|------|---|-------|-------|------|------|------|------|------|------|------|------|------|
| P49448 | Glutamate dehydrogenase 2, mitochondrial;Glutamate dehydrogenase 1,                 | GLUD2         | 170  | Y | 0.937 | 43.79 | NaN  | NaN  | NaN  | NaN  | 1.23 | 1.10 | 1.17 | 1.08 | 0.97 |
| P28482 | Mitogen-activated protein kinase 1                                                  | MAPK1         | 187  | Y | 1     | 250.5 | 1.99 | 2.07 | 1.93 | 1.93 | 1.84 | 1.75 | 1.11 | 1.16 | 1.08 |
| Q13523 | Serine/threonine-protein kinase PRP4 homolog                                        | PRPF4B        | 849  | Y | 0.986 | 261.3 | 1.10 | 1.07 | 1.09 | 1.17 | 1.12 | 1.17 | 1.15 | 1.14 | 1.10 |
| Q13541 | Eukaryotic translation initiation factor 4E-binding protein 1                       | EIF4EBP1      | 34   | Y | 0.72  | 81.21 | NaN  | 2.29 | 2.19 | 2.01 | NaN  | 2.06 | 2.05 | NaN  | 2.05 |
| Q13595 | Transformer-2 protein homolog alpha                                                 | TRA2A         | 87   | Y | 0.671 | 61.44 | 1.08 | NaN  | 0.97 | 0.90 | 0.83 | 0.94 | 1.32 | 1.24 | 1.25 |
| Q8N2E6 | Prosalusin;Salusin-alpha;Salusin-beta;Torsin-2A                                     | TOR2A         | 185  | Y | 0.605 | 42.68 | 0.96 | 0.78 | 1.08 | 0.90 | 0.70 | 0.97 | NaN  | 0.73 | NaN  |
| Q8N2E6 | Prosalusin;Salusin-alpha;Salusin-beta;Torsin-2A                                     | TOR2A         | 189  | Y | 0.992 | 42.68 | 0.96 | 0.78 | 1.08 | 0.90 | 0.70 | 0.97 | NaN  | 0.73 | NaN  |
| Q68DU9 | Kelch-like protein 8                                                                | DKFZp781C1855 | 353  | Y | 0.999 | 43.18 | NaN  | NaN  | NaN  | 0.96 | 1.13 | 1.21 | NaN  | NaN  | 1.04 |
| Q6PI26 | Protein SHQ1 homolog                                                                | SHQ1          | 344  | Y | 1     | 43.59 | NaN  | NaN  | NaN  | NaN  | NaN  | NaN  | 1.05 | 0.85 | NaN  |
| Q86YV5 | Tyrosine-protein kinase Sgk223                                                      | SGK223        | 413  | Y | 0.926 | 57.29 | 1.23 | 0.86 | NaN  | NaN  | 0.66 | NaN  | NaN  | NaN  | NaN  |
| Q96M20 | Cyclic nucleotide-binding domain-containing protein 2                               | CNBD2         | 302  | Y | 0.971 | 45.88 | NaN  | NaN  | NaN  | 1.56 | 2.72 | NaN  | NaN  | NaN  | NaN  |
| Q9NWQ8 | Phosphoprotein associated with glycosphingolipid-enriched microdomains 1            | PAG1          | 417  | Y | 1     | 124.5 | NaN  | NaN  | NaN  | 0.75 | 0.52 | NaN  | NaN  | 1.13 | NaN  |
| Q9NYQ8 | Protocadherin Fat 2                                                                 | FAT2          | 1877 | Y | 0.994 | 43.8  | NaN  | NaN  | NaN  | 0.89 | 0.93 | 0.95 | 0.40 | 0.46 | NaN  |
| Q9UIQ6 | Leucyl-cystinyl aminopeptidase;Leucyl-cystinyl aminopeptidase, oreanancv serum form | LNPEP         | 325  | Y | 0.73  | 45.92 | 0.64 | NaN  | 0.65 | 0.66 | 0.80 | 0.68 | NaN  | 0.60 | 0.91 |

Supplementary Table S3 The Bonding Energy of SFN docking to RAFs

| Software |        | Autodock4 <sup>[1]</sup> | Autodock Vina <sup>[2]</sup> | DockThor <sup>[3]</sup>   |                     |
|----------|--------|--------------------------|------------------------------|---------------------------|---------------------|
| Protein  | PDB id | ligand                   | Bonding energy (Kcal/mol)    | Bonding energy (Kcal/mol) | Affinity (Kcal/mol) |
| A-RAF    | 1wxm   | R,S-SFN                  | -2.8                         | -3.78                     | -6.909              |
|          |        | R-SFN                    | -3.0                         | -3.69                     | -6.988              |
|          |        | S-SFN                    | -2.8                         | -4.37                     | -6.909              |
| B-RAF    | 6p3d   | R,S-SFN                  | -3.7                         | -5.19                     | -7.139              |
|          |        | R-SFN                    | -4.0                         | -5.12                     | -7.139              |
|          |        | S-SFN                    | -4.0                         | -5.47                     | -7.144              |
| C-RAF    | 3omv   | R,S-SFN                  | -3.8                         | -5.0                      | -7.522              |
|          |        | R-SFN                    | -3.0                         | -5.34                     | -7.421              |
|          |        | S-SFN                    | -3.4                         | -5.27                     | -6.849              |

## References

- [1] Morris, G.M. et al. AutoDock4 and AutoDockTools4: Automated docking with selective receptor flexibility. *J Comput Chem* **30**, 2785-2791 (2009).
- [2] Trott, O., & Olson, A.J. AutoDock Vina: improving the speed and accuracy of docking with a new scoring function, efficient optimization, and multithreading. *J Comput Chem* **31**, 455-461 (2010).
- [3] Santos, K.B., Guedes, I.A., Karl, A.L.M., & Dardenne, L.E. Highly Flexible Ligand Docking: Benchmarking of the DockThor Program on the LEADS-PEP Protein-Peptide Data Set. *J Chem Inf Model* **60**, 667-683 (2020).

# Supplementary Figure S1

Uncropped western blots presented in Figure 7A are shown.

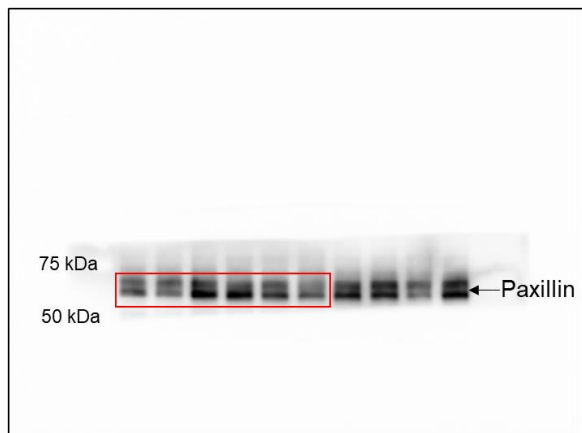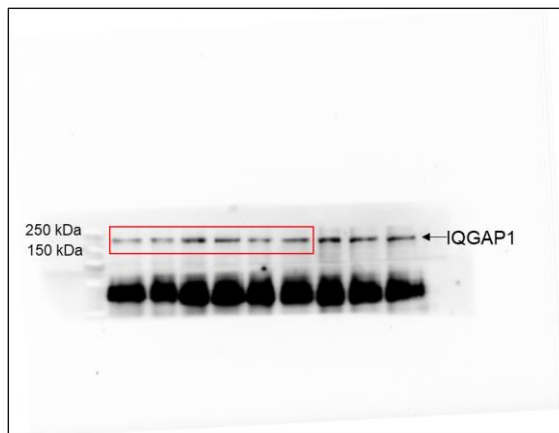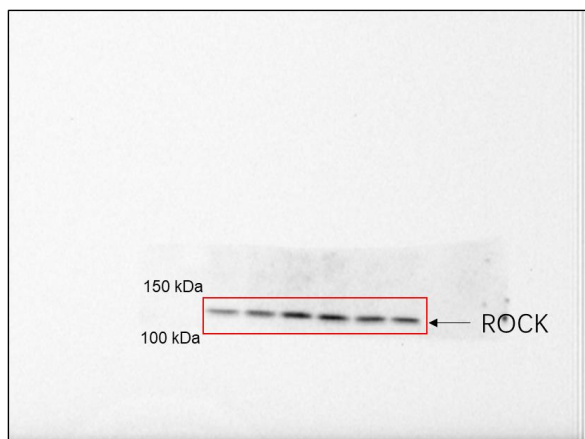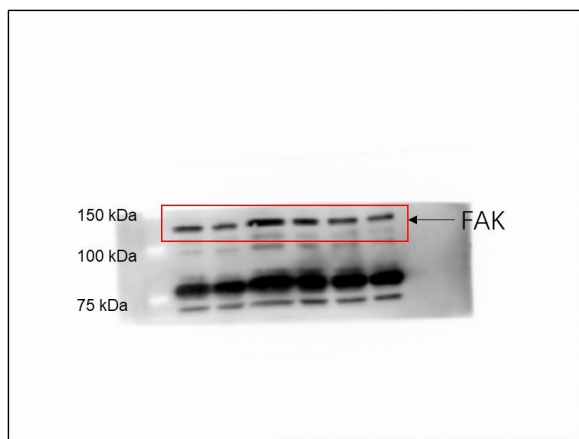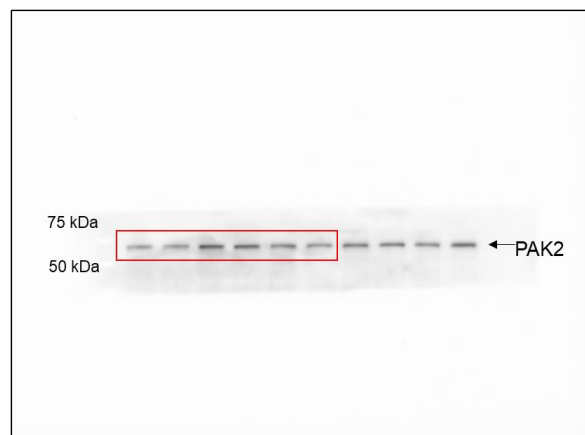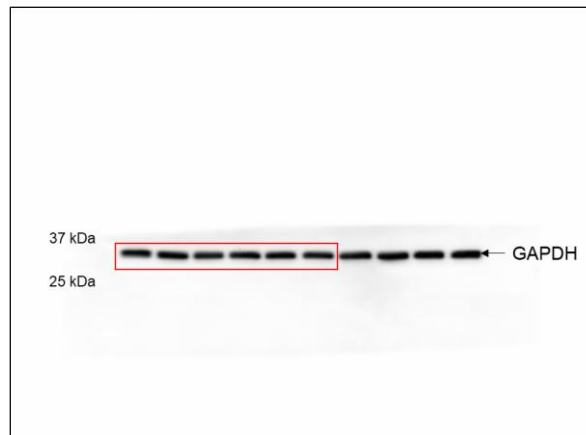

# Supplementary Figure S1

Uncropped western blots presented in Figure 7B are shown.

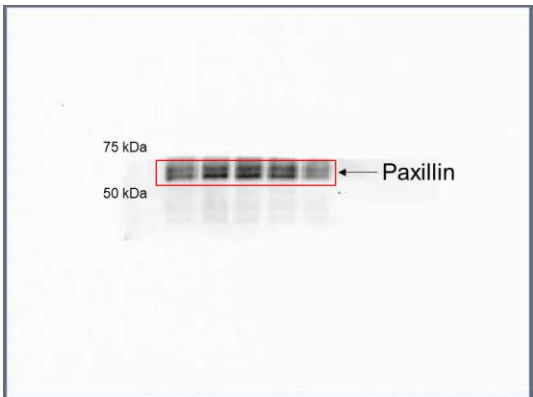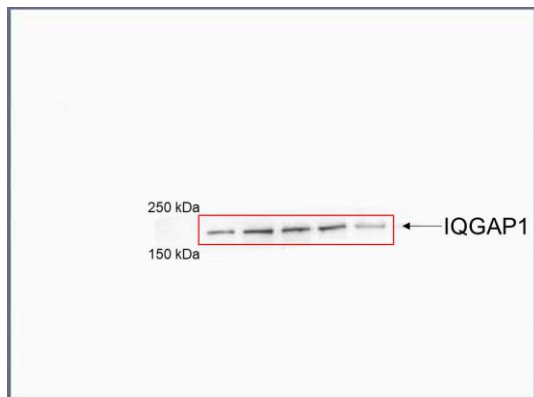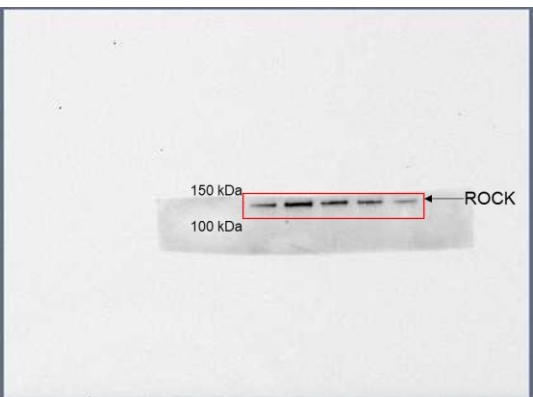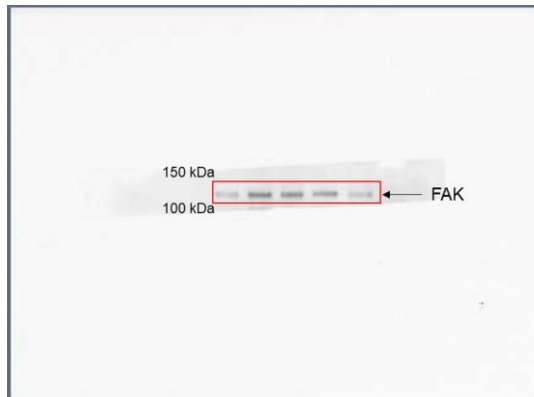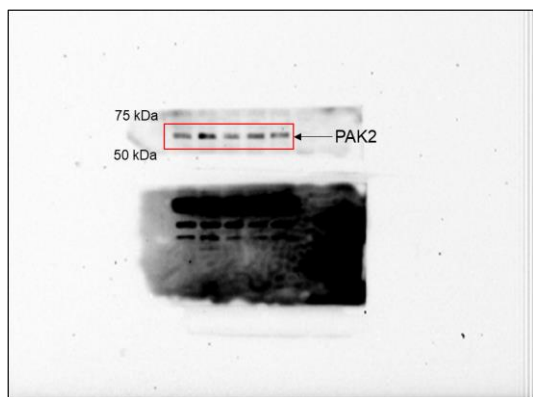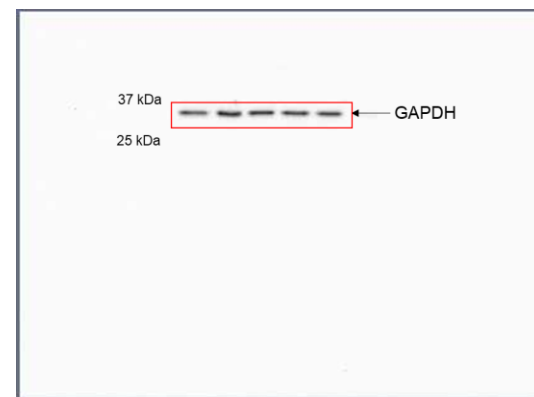

# Supplementary Figure S1

Uncropped western blots presented in Figure 8A are shown.

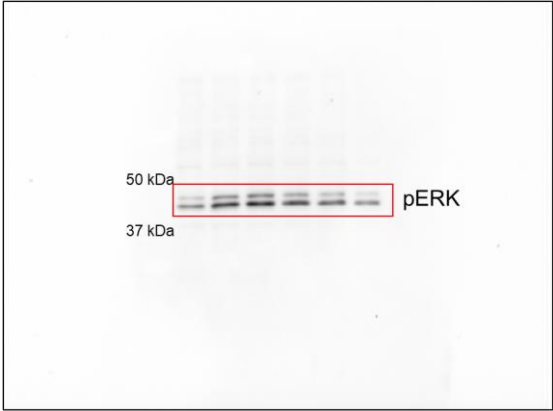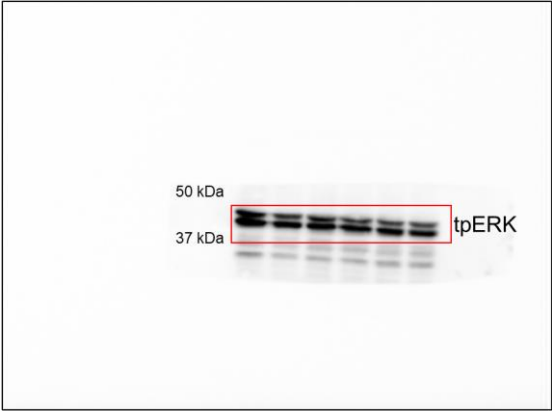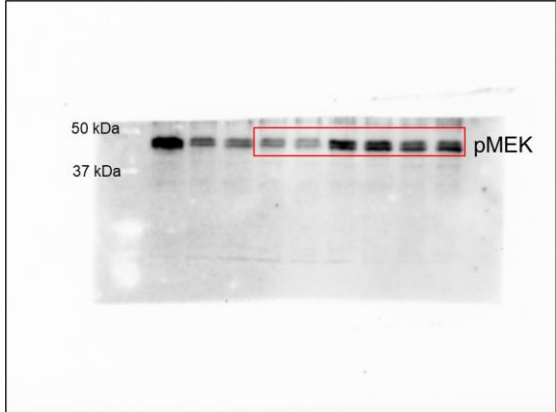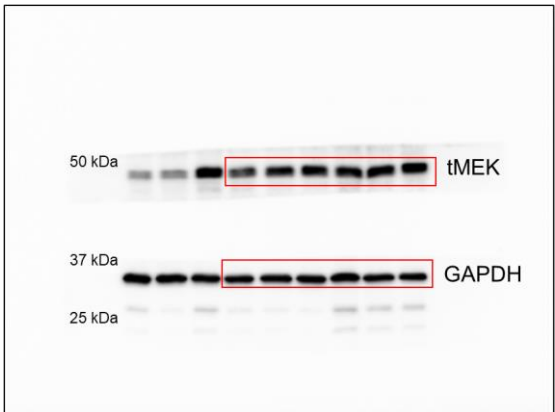

Supplement: 41523_2022_402_MOESM1_ESM.pdf [file 41523_2022_402_MOESM1_ESM.pdf]
